# Supplementary material for: Metal ion-immobilized magnetic nanoparticles for global enrichment and identification of phosphopeptides by mass spectrometry
Source: Royal Society of Chemistry journal article supplement (doi:10.1039/c5ra22006h), 2015-12-14
Supplement: c5ra22006h1.pdf [file c5ra22006h1.pdf]

## Electronic Supporting Information

### **Metal ion-immobilized magnetic nanoparticles for global enrichment and identification of phosphopeptides by mass spectrometry**

Rui Zhai,<sup>a,b</sup> Fang Tian,<sup>b</sup> Ruiqing Xue,<sup>b</sup> Fenglong Jiao,<sup>b</sup> Feiran Hao,<sup>b</sup> Yangjun Zhang,<sup>\*</sup>  
<sup>b</sup> and Xiaohong Qian<sup>\*,b</sup>

*<sup>a</sup>. College of Life Science and Bio-Engineering, Beijing University of Technology, Beijing 100022, China;*

*<sup>b</sup>. State Key Laboratory of Proteomics, Beijing Proteome Research Center, Beijing Institute of Radiation Medicine, Beijing 102206, China*

#### **Corresponding Authors**

\*E-mail: Xiaohong Qian: qianxh1@163.com. Phone&Fax: 86-01-80727777-1231.

\*E-mail: Yangjun Zhang: 13683167093@163.com. Phone&Fax: 86-01-80727777-1142.

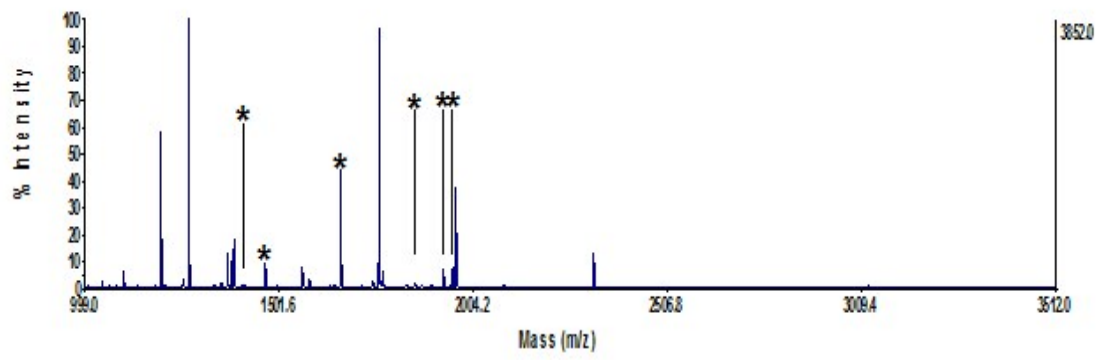

Figure S1. MALDI-TOF mass spectra of tryptic digest of 5 pmol of  $\alpha$ -casein after direct analysis.

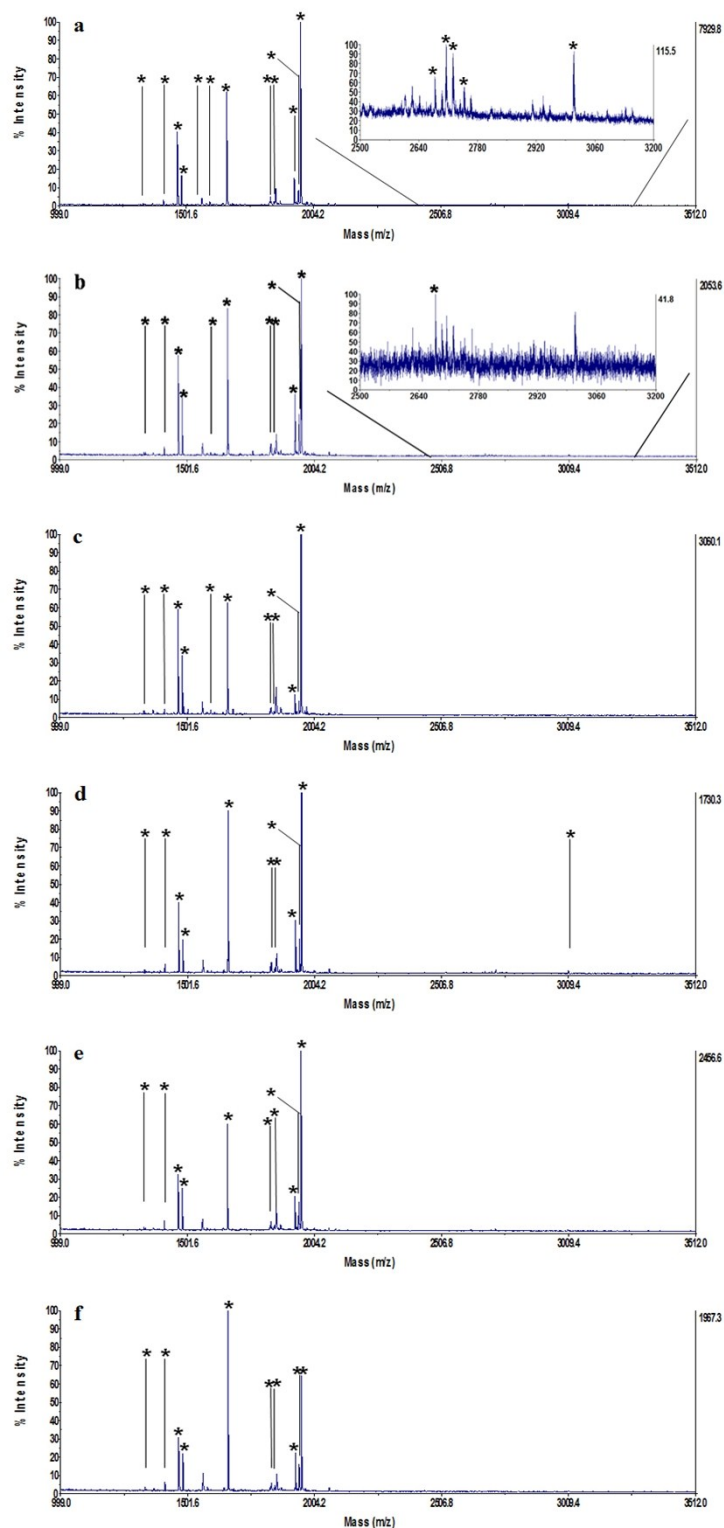

Figure S2. MALDI-TOF mass spectra of tryptic digest of 5 pmol of  $\alpha$ -casein (a-f) after enrichment by  $\text{Fe}_3\text{O}_4@\text{TCPP-DOTA-M}$  ( $\text{Ti}^{4+}$ ,  $\text{Zr}^{4+}$ ,  $\text{Fe}^{3+}$ ,  $\text{Tb}^{3+}$ ,  $\text{Tm}^{3+}$ ,  $\text{Ho}^{3+}$ ) for the first time.

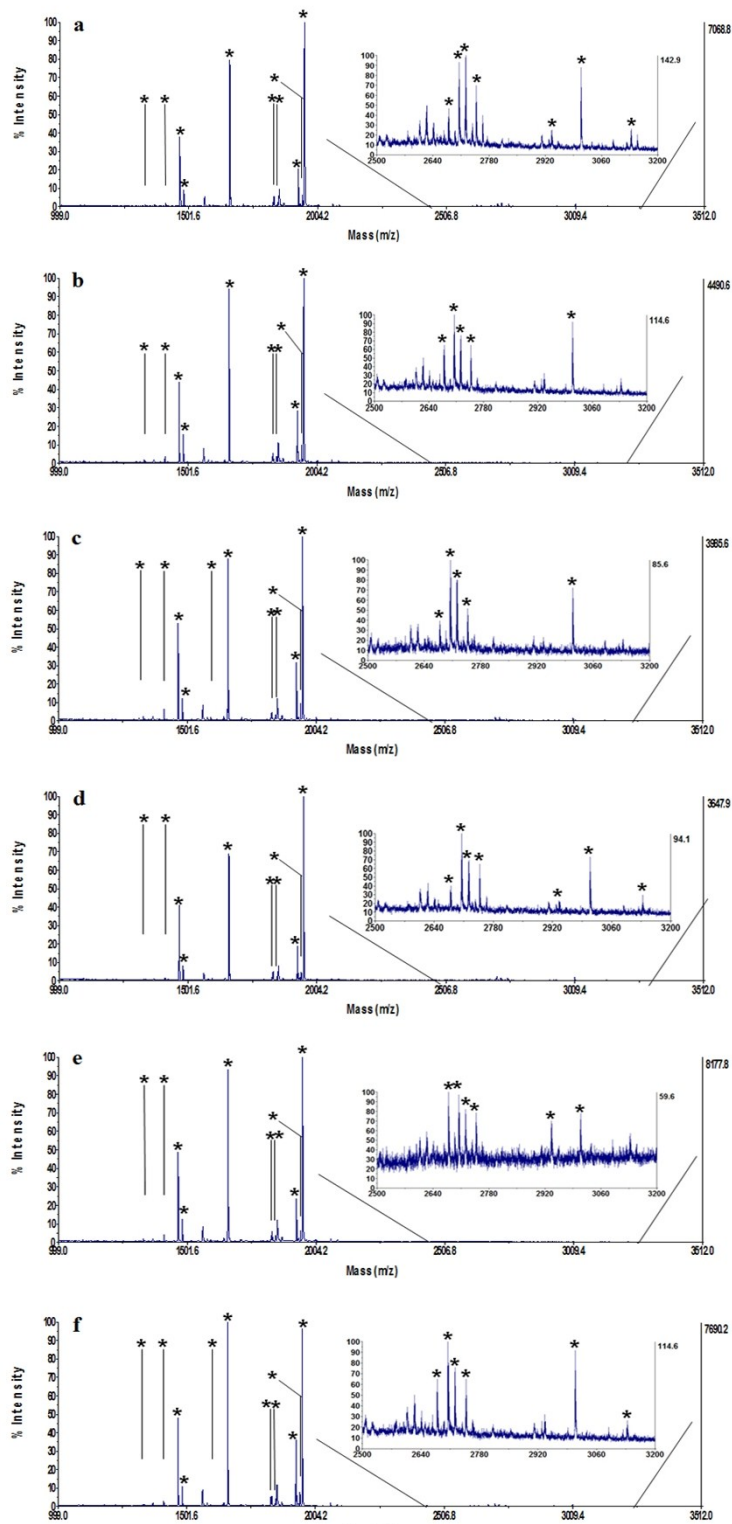

Figure S3. MALDI-TOF mass spectra of tryptic digest of 5 pmol of  $\alpha$ -casein (a-f) after enrichment by  $\text{Fe}_3\text{O}_4@\text{TCPP-DOTA-M}$  (Ti<sup>4+</sup>, Zr<sup>4+</sup>, Fe<sup>3+</sup>, Tb<sup>3+</sup>, Tm<sup>3+</sup>, Ho<sup>3+</sup>) for the fifth time.

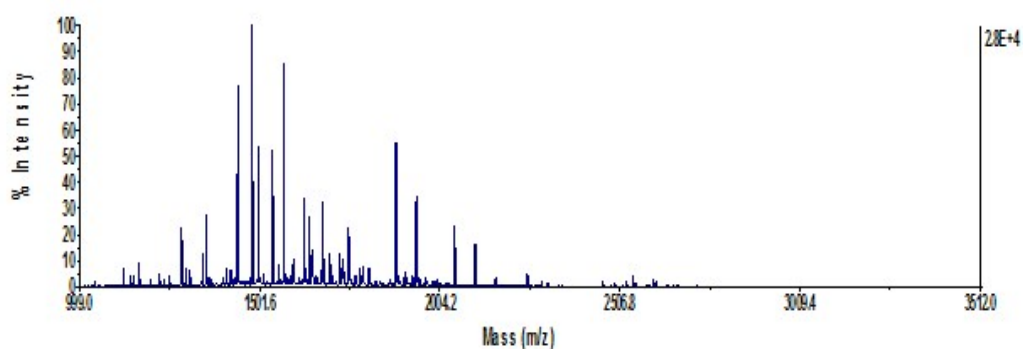

Figure S4. MALDI-TOF mass spectra of the tryptic digest mixture of  $\alpha$ -casein and BSA at a molar ratio of 1:50 after direct analysis.

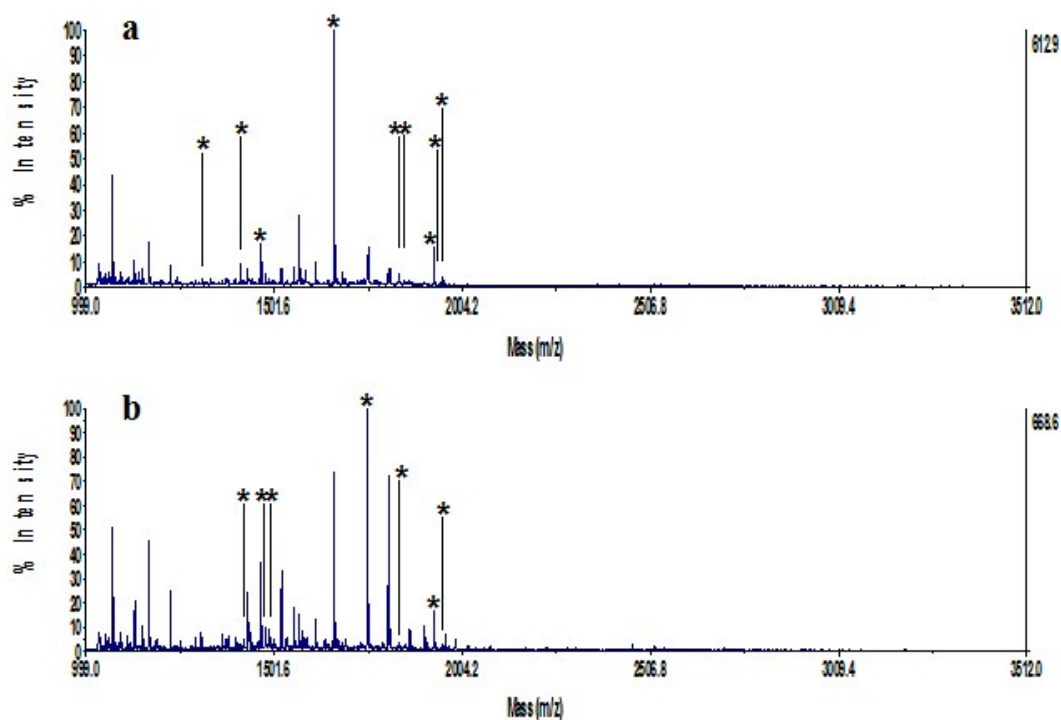

Figure S5. MALDI-TOF mass spectra of the mixture of  $\alpha$ -casein tryptic digest and BSA tryptic digest at a molar ratio of 1:50 analyses after enrichment by (a)  $\text{Ti}^{4+}$ -immobilized commercial IMAC materials and (b)  $\text{Zr}^{4+}$ -immobilized commercial IMAC materials.

**Table S1. Enriched phosphopeptides from tryptic digest of  $\alpha$ -casein by  $\text{Fe}_3\text{O}_4@\text{TCPP-DOTA-Ti}$ .**

| NO. | peptide sequence                                  | Number of Phosphate groups | (M+H)   |
|-----|---------------------------------------------------|----------------------------|---------|
| 1   | EQL[pS]T[pS]EENSK S2-(141-151)                    | 1                          | 1331.62 |
| 2   | EQL[pS]T[pS]EENSK S2-(141-151)                    | 2                          | 1411.59 |
| 3   | TVDME[pS]TEVFTK S2-(153-164)                      | 1                          | 1466.72 |
| 4   | TVD[Mo]E[pS]TEVFTK S2-(153-164)                   | 1                          | 1482.7  |
| 5   | TVDME[pS]TEVFTKK S2-(153-165)                     | 1                          | 1594.82 |
| 6   | VPQLEIVPN[pS]AEER S1-(121-134)                    | 1                          | 1660.92 |
| 7   | YLGEYLIVPN[pS]AEER S1-(104-119)                   | 1                          | 1832.83 |
| 8   | DIG[pS]E[pS]TEDQAMEDIK S1-(58-73)                 | 1                          | 1847.86 |
| 9   | DIG[pS]E[pS]TEDQAMEDIK S1-(58-73)                 | 2                          | 1927.84 |
| 10  | DIG[pS]E[pS]TEDQA[Mo]EDIK S1-(58-73)              | 2                          | 1943.81 |
| 11  | YKVPQLEIVPN[pS]AEER S1-(119-134)                  | 1                          | 1952.12 |
| 12  | VNEL[pS]KDIG[pS]E[pS]TEDQAMEDIK S1-(52-73)        | 3                          | 2678.24 |
| 13  | Q*MEAE[pS]I[pS][pS][pS]EEIVPN[pS]VEAQK S1-(74-94) | 5                          | 2704.25 |
| 14  | NTMEHV[pS] [pS] [pS]EE[pS]IISQETYKQ S2-(17-37)    | 4                          | 2747.23 |
| 15  | NANEEYSIG[pS] [pS] [pS]EE[pS]AEVATEEVK S2-(61-85) | 4                          | 3008.28 |

**Table S2. Enriched phosphopeptides from tryptic digest of  $\alpha$ -casein by  $\text{Fe}_3\text{O}_4@\text{TCPP-DOTA-Zr}$ .**

| NO. | peptide sequence                     | Number of Phosphate groups | (M+H)   |
|-----|--------------------------------------|----------------------------|---------|
| 1   | EQL[pS]T[pS]EENSK S2-(141-151)       | 1                          | 1331.62 |
| 2   | EQL[pS]T[pS]EENSK S2-(141-151)       | 2                          | 1411.59 |
| 3   | TVDME[pS]TEVFTK S2-(153-164)         | 1                          | 1466.72 |
| 4   | TVD[Mo]E[pS]TEVFTK S2-(153-164)      | 1                          | 1482.7  |
| 5   | TVDME[pS]TEVFTKK S2-(153-165)        | 1                          | 1594.82 |
| 6   | VPQLEIVPN[pS]AEER S1-(121-134)       | 1                          | 1660.92 |
| 7   | YLGEYLIVPN[pS]AEER S1-(104-119)      | 1                          | 1832.83 |
| 8   | DIG[pS]E[pS]TEDQAMEDIK S1-(58-73)    | 1                          | 1847.86 |
| 9   | DIG[pS]E[pS]TEDQAMEDIK S1-(58-73)    | 2                          | 1927.84 |
| 10  | DIG[pS]E[pS]TEDQA[Mo]EDIK S1-(58-73) | 2                          | 1943.81 |
| 11  | YKVPQLEIVPN[pS]AEER S1-(119-134)     | 1                          | 1952.12 |

|    |                                                   |   |         |
|----|---------------------------------------------------|---|---------|
| 12 | VNEL[pS]KDIG[pS]E[pS]TEDQAMEDIK S1-(52-73)        | 3 | 2678.24 |
| 13 | Q*MEAE[pS]I[pS][pS][pS]EEIVPN[pS]VEAQK S1-(74-94) | 5 | 2704.25 |
| 14 | NANEEYSIG[pS] [pS] [pS]EE[pS]AEVATEEVK S2-(61-85) | 4 | 3008.28 |

**Table S3. Enriched phosphopeptides from tryptic digest of  $\alpha$ -casein by  $\text{Fe}_3\text{O}_4@T\text{CPP-DOTA-Fe}$ .**

| NO. | peptide sequence                                  | Number of Phosphate groups | (M+H)   |
|-----|---------------------------------------------------|----------------------------|---------|
| 1   | EQL[pS]T[pS]EENSK S2-(141-151)                    | 2                          | 1411.59 |
| 2   | TVDME[pS]TEVFTK S2-(153-164)                      | 1                          | 1466.72 |
| 3   | TVD[Mo]E[pS]TEVFTK S2-(153-164)                   | 1                          | 1482.7  |
| 4   | TVDME[pS]TEVFTKK S2-(153-165)                     | 1                          | 1594.82 |
| 5   | VPQLEIVPN[pS]AEER S1-(121-134)                    | 1                          | 1660.92 |
| 6   | YLGEYLIVPN[pS]AEER S1-(104-119)                   | 1                          | 1832.83 |
| 7   | DIG[pS]E[pS]TEDQAMEDIK S1-(58-73)                 | 1                          | 1847.86 |
| 8   | DIG[pS]E[pS]TEDQAMEDIK S1-(58-73)                 | 2                          | 1927.84 |
| 9   | DIG[pS]E[pS]TEDQA[Mo]EDIK S1-(58-73)              | 2                          | 1943.81 |
| 10  | YKVPQLEIVPN[pS]AEER S1-(119-134)                  | 1                          | 1952.12 |
| 11  | NANEEYSIG[pS] [pS] [pS]EE[pS]AEVATEEVK S2-(61-85) | 4                          | 3008.28 |

**Table S4. Enriched phosphopeptides from tryptic digest of  $\alpha$ -casein by  $\text{Fe}_3\text{O}_4@T\text{CPP-DOTA-Tb}$ .**

| NO. | peptide sequence                  | Number of Phosphate groups | (M+H)   |
|-----|-----------------------------------|----------------------------|---------|
| 1   | EQL[pS]T[pS]EENSK S2-(141-151)    | 1                          | 1331.62 |
| 2   | EQL[pS]T[pS]EENSK S2-(141-151)    | 2                          | 1411.59 |
| 3   | TVDME[pS]TEVFTK S2-(153-164)      | 1                          | 1466.72 |
| 4   | TVD[Mo]E[pS]TEVFTK S2-(153-164)   | 1                          | 1482.7  |
| 5   | TVDME[pS]TEVFTKK S2-(153-165)     | 1                          | 1594.82 |
| 6   | VPQLEIVPN[pS]AEER S1-(121-134)    | 1                          | 1660.92 |
| 7   | YLGEYLIVPN[pS]AEER S1-(104-119)   | 1                          | 1832.83 |
| 8   | DIG[pS]E[pS]TEDQAMEDIK S1-(58-73) | 1                          | 1847.86 |
| 9   | DIG[pS]E[pS]TEDQAMEDIK S1-(58-73) | 2                          | 1927.84 |

|    |                                                     |   |         |
|----|-----------------------------------------------------|---|---------|
| 10 | DIG[pS]E[pS]TEDQA[Mo]EDIK S1-(58-73)                | 2 | 1943.81 |
| 11 | YKVPQLEIVPN[pS]AEER S1-(119-134)                    | 1 | 1952.12 |
| 12 | VNEL[pS]KDIG[pS]E[pS]TEDQAMEDIK S1-(52-73)          | 3 | 2678.24 |
| 13 | Q*MEAE[pS]I[pS][pS][pS]EEIVPN[pS]VEAQK S1-(74-94)   | 5 | 2704.25 |
| 14 | NTMEHV[pS] [pS] [pS]EE[pS]IISQETYKQ S2-(17-37)      | 4 | 2747.23 |
| 15 | NANEEEEYSIG[pS] [pS] [pS]EE[pS]AEVATEEVK S2-(61-85) | 4 | 3008.28 |

**Table S5. Enriched phosphopeptides from tryptic digest of  $\alpha$ -casein by  $\text{Fe}_3\text{O}_4@T\text{CPP-DOTA-Tm}$ .**

| NO. | peptide sequence                                    | Number of Phosphate groups | (M+H)   |
|-----|-----------------------------------------------------|----------------------------|---------|
| 1   | EQL[pS]T[pS]EENSK S2-(141-151)                      | 2                          | 1411.59 |
| 2   | TVDME[pS]TEVFTK S2-(153-164)                        | 1                          | 1466.72 |
| 3   | TVD[Mo]E[pS]TEVFTK S2-(153-164)                     | 1                          | 1482.7  |
| 4   | TVDME[pS]TEVFTKK S2-(153-165)                       | 1                          | 1594.82 |
| 5   | VPQLEIVPN[pS]AEER S1-(121-134)                      | 1                          | 1660.92 |
| 6   | YLGEYLIVPN[pS]AEER S1-(104-119)                     | 1                          | 1832.83 |
| 7   | DIG[pS]E[pS]TEDQAMEDIK S1-(58-73)                   | 2                          | 1927.84 |
| 8   | DIG[pS]E[pS]TEDQA[Mo]EDIK S1-(58-73)                | 2                          | 1943.81 |
| 9   | YKVPQLEIVPN[pS]AEER S1-(119-134)                    | 1                          | 1952.12 |
| 10  | VNEL[pS]KDIG[pS]E[pS]TEDQAMEDIK S1-(52-73)          | 3                          | 2678.24 |
| 11  | NANEEEEYSIG[pS] [pS] [pS]EE[pS]AEVATEEVK S2-(61-85) | 4                          | 3008.28 |

**Table S6. Enriched phosphopeptides from tryptic digest of  $\alpha$ -casein by  $\text{Fe}_3\text{O}_4@T\text{CPP-DOTA-Ho}$ .**

| NO. | peptide sequence                | Number of Phosphate groups | (M+H)   |
|-----|---------------------------------|----------------------------|---------|
| 1   | EQL[pS]T[pS]EENSK S2-(141-151)  | 1                          | 1331.62 |
| 2   | EQL[pS]T[pS]EENSK S2-(141-151)  | 2                          | 1411.59 |
| 3   | TVDME[pS]TEVFTK S2-(153-164)    | 1                          | 1466.72 |
| 4   | TVD[Mo]E[pS]TEVFTK S2-(153-164) | 1                          | 1482.7  |
| 5   | VPQLEIVPN[pS]AEER S1-(121-134)  | 1                          | 1660.92 |



|    |                                                   |   |         |
|----|---------------------------------------------------|---|---------|
| 6  | YLGEYLIVPN[pS]AEER S1-(104-119)                   | 1 | 1832.83 |
| 7  | DIG[pS]E[pS]TEDQAMEDIK S1-(58-73)                 | 1 | 1847.86 |
| 8  | DIG[pS]E[pS]TEDQAMEDIK S1-(58-73)                 | 2 | 1927.84 |
| 9  | DIG[pS]E[pS]TEDQA[Mo]EDIK S1-(58-73)              | 2 | 1943.81 |
| 10 | YKVPQLEIVPN[pS]AEER S1-(119-134)                  | 1 | 1952.12 |
| 11 | VNEL[pS]KDIG[pS]E[pS]TEDQAMEDIK S1-(52-73)        | 3 | 2678.24 |
| 12 | Q*MEAE[pS]I[pS][pS][pS]EEIVPN[pS]VEAQK S1-(74-94) | 5 | 2704.25 |
| 13 | NANEEYSIG[pS] [pS] [pS]EE[pS]AEVATEEVK S2-(61-85) | 4 | 3008.28 |

**Table S7. Enriched phosphopeptides from tryptic digest of  $\alpha$ -casein and BSA at a molar ratio of 1:50 by  $\text{Fe}_3\text{O}_4@T\text{CPP-DOTA-Ti}$ .**

| NO. | peptide sequence                                   | Number of Phosphate groups | (M+H)   |
|-----|----------------------------------------------------|----------------------------|---------|
| 1   | EQL[pS]T[pS]EENSK S2-(141-151)                     | 1                          | 1331.62 |
| 2   | EQL[pS]T[pS]EENSK S2-(141-151)                     | 2                          | 1411.59 |
| 3   | TVDME[pS]TEVFTK S2-(153-164)                       | 1                          | 1466.72 |
| 4   | TVD[Mo]E[pS]TEVFTK S2-(153-164)                    | 1                          | 1482.7  |
| 5   | VPQLEIVPN[pS]AEER S1-(121-134)                     | 1                          | 1660.92 |
| 6   | YLGEYLIVPN[pS]AEER S1-(104-119)                    | 1                          | 1832.83 |
| 7   | DIG[pS]E[pS]TEDQAMEDIK S1-(58-73)                  | 1                          | 1847.86 |
| 8   | DIG[pS]E[pS]TEDQAMEDIK S1-(58-73)                  | 2                          | 1927.84 |
| 9   | DIG[pS]E[pS]TEDQA[Mo]EDIK S1-(58-73)               | 2                          | 1943.81 |
| 10  | YKVPQLEIVPN[pS]AEER S1-(119-134)                   | 1                          | 1952.12 |
| 11  | NTMEHV[pS] [pS] [pS]EE[pS]IISQETYK S2-(17-36)      | 4                          | 2619.15 |
| 12  | VNEL[pS]KDIG[pS]E[pS]TEDQAMEDIK S1-(52-73)         | 3                          | 2678.24 |
| 13  | QMEAE[pS]I[pS] [pS] [pS]EEIVPN[pS]VEAQK S1-(74-94) | 5                          | 2721.16 |
| 14  | NANEEYSIG[pS] [pS] [pS]EE[pS]AEVATEEVK S2-(61-85)  | 4                          | 3008.28 |

**Table S8. Enriched phosphopeptides from tryptic digest of  $\alpha$ -casein and BSA at a molar ratio of 1:50 by  $\text{Fe}_3\text{O}_4@T\text{CPP-DOTA-Zr}$ .**

| NO. | peptide sequence               | Number of Phosphate groups | (M+H)   |
|-----|--------------------------------|----------------------------|---------|
| 1   | EQL[pS]T[pS]EENSK S2-(141-151) | 1                          | 1331.62 |
| 2   | EQL[pS]T[pS]EENSK S2-(141-151) | 2                          | 1411.59 |

|    |                                                   |   |         |
|----|---------------------------------------------------|---|---------|
| 3  | TVDME[pS]TEVFTK S2-(153-164)                      | 1 | 1466.72 |
| 4  | TVD[Mo]E[pS]TEVFTK S2-(153-164)                   | 1 | 1482.7  |
| 5  | TVDME[pS]TEVFTKK S2-(153-165)                     | 1 | 1594.82 |
| 6  | VPQLEIVPN[pS]AEER S1-(121-134)                    | 1 | 1660.92 |
| 7  | YLGEYLIVPN[pS]AEER S1-(104-119)                   | 1 | 1832.83 |
| 8  | DIG[pS]E[pS]TEDQAMEDIK S1-(58-73)                 | 1 | 1847.86 |
| 9  | DIG[pS]E[pS]TEDQAMEDIK S1-(58-73)                 | 2 | 1927.84 |
| 10 | DIG[pS]E[pS]TEDQA[Mo]EDIK S1-(58-73)              | 2 | 1943.81 |
| 11 | YKVPQLEIVPN[pS]AEER S1-(119-134)                  | 1 | 1952.12 |
| 12 | NANEEYSIG[pS] [pS] [pS]EE[pS]AEVATEEVK S2-(61-85) | 4 | 3008.28 |

**Table S9. Enriched phosphopeptides from tryptic digest of  $\alpha$ -casein and BSA at a molar ratio of 1:50 by Fe<sub>3</sub>O<sub>4</sub>@TCPP-DOTA-Fe.**

| NO. | peptide sequence                                  | Number of Phosphate groups | (M+H)   |
|-----|---------------------------------------------------|----------------------------|---------|
| 1   | EQL[pS]T[pS]EENSK S2-(141-151)                    | 1                          | 1331.62 |
| 2   | EQL[pS]T[pS]EENSK S2-(141-151)                    | 2                          | 1411.59 |
| 3   | TVDME[pS]TEVFTK S2-(153-164)                      | 1                          | 1466.72 |
| 4   | TVD[Mo]E[pS]TEVFTK S2-(153-164)                   | 1                          | 1482.7  |
| 5   | EQL[pS]T[pS]EENSKK S2-(141-152)                   | 2                          | 1539.7  |
| 6   | TVDME[pS]TEVFTKK S2-(153-165)                     | 1                          | 1594.82 |
| 7   | VPQLEIVPN[pS]AEER S1-(121-134)                    | 1                          | 1660.92 |
| 8   | YLGEYLIVPN[pS]AEER S1-(104-119)                   | 1                          | 1832.83 |
| 9   | DIG[pS]E[pS]TEDQAMEDIK S1-(58-73)                 | 2                          | 1927.84 |
| 10  | DIG[pS]E[pS]TEDQA[Mo]EDIK S1-(58-73)              | 2                          | 1943.81 |
| 11  | YKVPQLEIVPN[pS]AEER S1-(119-134)                  | 1                          | 1952.12 |
| 12  | NANEEYSIG[pS] [pS] [pS]EE[pS]AEVATEEVK S2-(61-85) | 4                          | 3008.28 |

**Table S10. Enriched phosphopeptides from tryptic digest of  $\alpha$ -casein and BSA at a molar ratio of 1:50 by Fe<sub>3</sub>O<sub>4</sub>@TCPP-DOTA-Tb.**

| NO. | peptide sequence               | Number of Phosphate groups | (M+H)   |
|-----|--------------------------------|----------------------------|---------|
| 1   | EQL[pS]T[pS]EENSK S2-(141-151) | 1                          | 1331.62 |

|    |                                                    |   |         |
|----|----------------------------------------------------|---|---------|
| 2  | EQL[pS]T[pS]EENSK S2-(141-151)                     | 2 | 1411.59 |
| 3  | TVDME[pS]TEVFTK S2-(153-164)                       | 1 | 1466.72 |
| 4  | TVD[Mo]E[pS]TEVFTK S2-(153-164)                    | 1 | 1482.7  |
| 5  | VPQLEIVPN[pS]AEER S1-(121-134)                     | 1 | 1660.92 |
| 6  | YLGEYLIVPN[pS]AEER S1-(104-119)                    | 1 | 1832.83 |
| 7  | DIG[pS]E[pS]TEDQAMEDIK S1-(58-73)                  | 1 | 1847.86 |
| 8  | DIG[pS]E[pS]TEDQAMEDIK S1-(58-73)                  | 2 | 1927.84 |
| 9  | DIG[pS]E[pS]TEDQA[Mo]EDIK S1-(58-73)               | 2 | 1943.81 |
| 10 | YKVPQLEIVPN[pS]AEER S1-(119-134)                   | 1 | 1952.12 |
| 11 | NTMEHV[pS] [pS] [pS]EE[pS]IISQETYK S2-(17-36)      | 4 | 2619.15 |
| 12 | VNEL[pS]KDIG[pS]E[pS]TEDQAMEDIK S1-(52-73)         | 3 | 2678.24 |
| 13 | Q*MEAE[pS]I[pS][pS][pS]EEIVPN[pS]VEAQK S1-(74-94)  | 5 | 2704.25 |
| 14 | QMEAE[pS]I[pS] [pS] [pS]EEIVPN[pS]VEAQK S1-(74-94) | 5 | 2721.16 |
| 15 | NANEEYSIG[pS] [pS] [pS]EE[pS]AEVATEEVK S2-(61-85)  | 4 | 3008.28 |

**Table S11. Enriched phosphopeptides from tryptic digest of  $\alpha$ -casein and BSA at a molar ratio of 1:50 by Fe<sub>3</sub>O<sub>4</sub>@TCPP-DOTA-Tm.**

| NO. | peptide sequence                                  | Number of Phosphate groups | (M+H)   |
|-----|---------------------------------------------------|----------------------------|---------|
| 1   | EQL[pS]T[pS]EENSK S2-(141-151)                    | 1                          | 1331.62 |
| 2   | EQL[pS]T[pS]EENSK S2-(141-151)                    | 2                          | 1411.59 |
| 3   | TVDME[pS]TEVFTK S2-(153-164)                      | 1                          | 1466.72 |
| 4   | TVD[Mo]E[pS]TEVFTK S2-(153-164)                   | 1                          | 1482.7  |
| 5   | TVDME[pS]TEVFTKK S2-(153-165)                     | 1                          | 1594.82 |
| 6   | VPQLEIVPN[pS]AEER S1-(121-134)                    | 1                          | 1660.92 |
| 7   | YLGEYLIVPN[pS]AEER S1-(104-119)                   | 1                          | 1832.83 |
| 8   | DIG[pS]E[pS]TEDQAMEDIK S1-(58-73)                 | 1                          | 1847.86 |
| 9   | DIG[pS]E[pS]TEDQAMEDIK S1-(58-73)                 | 2                          | 1927.84 |
| 10  | DIG[pS]E[pS]TEDQA[Mo]EDIK S1-(58-73)              | 2                          | 1943.81 |
| 11  | YKVPQLEIVPN[pS]AEER S1-(119-134)                  | 1                          | 1952.12 |
| 12  | NANEEYSIG[pS] [pS] [pS]EE[pS]AEVATEEVK S2-(61-85) | 4                          | 3008.28 |

**Table S12. Enriched phosphopeptides from tryptic digest of  $\alpha$ -casein and BSA at a molar ratio of 1:50 by Fe<sub>3</sub>O<sub>4</sub>@TCPP-DOTA-Ho.**

| NO. | peptide sequence                     | Number of Phosphate groups | (M+H)   |
|-----|--------------------------------------|----------------------------|---------|
| 1   | TVDME[pS]TEVFTK S2-(153-164)         | 1                          | 1466.72 |
| 2   | TVD[Mo]E[pS]TEVFTK S2-(153-164)      | 1                          | 1482.7  |
| 3   | VPQLEIVPN[pS]AEER S1-(121-134)       | 1                          | 1660.92 |
| 4   | YLGEYLIVPN[pS]AEER S1-(104-119)      | 1                          | 1832.83 |
| 5   | DIG[pS]E[pS]TEDQAMEDIK S1-(58-73)    | 2                          | 1927.84 |
| 6   | DIG[pS]E[pS]TEDQA[Mo]EDIK S1-(58-73) | 2                          | 1943.81 |
| 7   | YKVPQLEIVPN[pS]AEER S1-(119-134)     | 1                          | 1952.12 |
