# Supplementary material for: Metal ion-immobilized magnetic nanoparticles for global enrichment and identification of phosphopeptides by mass spectrometry
Source: Royal Society of Chemistry journal article supplement (doi:10.1039/c5ra22006h), 2015-12-14
Supplement: c5ra22006h2.pdf [file c5ra22006h2.pdf]

|    | phosphopeptide                                   | protein               |
|----|--------------------------------------------------|-----------------------|
| 1  | TSSTCSNESLSVGGTSVTPR202000000000000000           | sp 060343 TBCD4_HUMAN |
| 2  | LQDSSSEEDVTEETDHR222000000000000000              | sp Q76FK4 NOL8_HUMAN  |
| 3  | SQSSEGVSSLSSSPNSLETQSQSLSR2200000000000000       | sp 095155 UBE4B_HUMAN |
| 4  | EPVADEEEEDSDDDVPEITEFR2000000000000000           | sp P54105 ICLN_HUMAN  |
| 5  | GTGQSDSDIWDDTALIK200200000000000000              | sp Q16637 SMN_HUMAN   |
| 6  | GVDFESSEDDDDDPFMTSSLR220000000000000000          | sp P49959 MRE11_HUMAN |
|    |                                                  | sp P01891 1A68_HUMAN  |
|    |                                                  | sp P10316 1A69_HUMAN  |
| 7  | GGSYSQAASSDSAQGSVSLTACK2E+20                     | sp P01892 1A02_HUMAN  |
|    |                                                  | sp P05534 1A24_HUMAN  |
|    |                                                  | sp P30447 1A23_HUMAN  |
|    |                                                  | sp Q09160 1A80_HUMAN  |
| 8  | LSEDEEEDEAEDDQSEASGK2. 2E+20                     | sp Q8NEJ9 NGDN_HUMAN  |
| 9  | KLSSSDAPAQDTGSSAAAVETDASR2E+23                   | sp Q7Z4S6 KI21A_HUMAN |
| 10 | AEQSEEEEGEGEEEEEGGESK200000000000000000          | sp Q8NE71 ABCF1_HUMAN |
| 11 | ASTASPCNNNINAATAVALQEPR2E+19                     | sp Q71RC2 LARP4_HUMAN |
| 12 | TSSDDESEDEDDLLQR200020000000000000               | sp Q9Y5J1 UTP18_HUMAN |
| 13 | MESEGGADDSAEGLDLDNEDR200000000000000000          | sp P07910 HNRPC_HUMAN |
| 14 | MLAESDESGDEESVSQTDK200200000000000000            | sp P22059 OSBP1_HUMAN |
| 15 | SASSDTSEELNSQDSPPK200000000000000000             | sp 014745 NHRF1_HUMAN |
| 16 | KRSSSEDDDLVDESDFDASINSYSVSDGSTR2. 2000000002E+30 | sp Q14839 CHD4_HUMAN  |
| 17 | LPSPTSPFSSLSQDQAATSK200000000000000000           | sp Q8WWI1 LMO7_HUMAN  |
| 18 | INSSGESGDESDFLQSR220020000000000000              | sp 060841 IF2P_HUMAN  |
| 19 | GTGQSDSDIWDDTALIK200000200000000000              | sp Q16637 SMN_HUMAN   |
| 20 | LAEDGESEPEAVGQSR200000000000000000               | sp Q9UIG0 BAZ1B_HUMAN |
| 21 | HSLDSEEEEDDDGGSSK200000000000000000              | sp 095400 CD2B2_HUMAN |
| 22 | GDVEGSQSQDEGEGSGESER2000000000000000             | sp Q9UQE7 SMC3_HUMAN  |
| 23 | SASPDDLGSNWAAADLGNEER2. 02E+23                   | sp 000193 SMAP_HUMAN  |
| 24 | NENTEGSPQEDGVELEGLK2000000000000000              | sp P11388 TOP2A_HUMAN |
| 25 | SPPGSGASTPVGPWDQAVQR2E+20                        | sp Q8TE77 SSH3_HUMAN  |
| 26 | TVSQSFDGVS LDSSGPEDR200000000000000000           | sp Q6BDS2 URFB1_HUMAN |
| 27 | SDAEDGGTVSQEEEDR200000000000000000               | sp P27824 CALX_HUMAN  |
| 28 | TADSSSEDEEEYVVEK222200000000000000               | sp P45973 CBX5_HUMAN  |
| 29 | KTSSDDESEDEDDLLQR200020000000000000              | sp Q9Y5J1 UTP18_HUMAN |
| 30 | SEAAAPHTDAGGLSSDEEEGTSSQAEEAR2200000000000000    | sp Q01831 XPC_HUMAN   |
| 31 | LQELES CSGLGSTSDTDVR2000000000000000             | sp Q14C86 GAPD1_HUMAN |
| 32 | MLAESDESGDEESVSQTDK1. 0002002E+19                | sp P22059 OSBP1_HUMAN |
| 33 | ALDISLSSGEDEGDEEDSTAGTTK2. 2E+19                 | sp Q8IY81 SPB1_HUMAN  |
| 34 | GDSESEDEDELEVPVPSR202000000000000000             | sp P13861 KAP2_HUMAN  |
| 35 | DSGSDDFLMEDDDSDYGSSK2. 02000001E+21              | sp Q9H1E3 NUCKS_HUMAN |
| 36 | TSSTCSNESLSVGGTSVTPR220000000000000000           | sp 060343 TBCD4_HUMAN |
| 37 | SPVFSDESDLDLDFDISK2000200000000000               | sp 000566 MPP10_HUMAN |
| 38 | ELNEDDSTDCDDVQR220000000000000000                | sp Q8WU17 RN139_HUMAN |
| 39 | AGGLQSDTEDECWSDTEAVPR202000002000000000          | sp Q9H6H4 REEP4_HUMAN |
|    |                                                  | sp P05534 1A24_HUMAN  |
|    |                                                  | sp Q09160 1A80_HUMAN  |
| 40 | GGSYSQAASSDSAQGSVSLTACK2E+20                     | sp P30447 1A23_HUMAN  |
|    |                                                  | sp P01891 1A68_HUMAN  |
|    |                                                  | sp P01892 1A02_HUMAN  |
|    |                                                  | sp P10316 1A69_HUMAN  |
|    |                                                  | sp Q6NXS1 IPP2M_HUMAN |
| 41 | IQQEESGGEEDSDLSPEER2200000000000000              | sp P41236 IPP2_HUMAN  |
| 42 | SSGSPYGGGYGSGGGSGGYGSR2E+21                      | sp P51991 ROA3_HUMAN  |

|    |                                                        |                       |
|----|--------------------------------------------------------|-----------------------|
| 43 | GSDSEDFEFEIQAEDDAR202000000000000000                   | sp Q8TDD1 DDX54_HUMAN |
| 44 | EELMSSDLEETAGSTSIPK2200000000000000                    | sp 000567 NOP56_HUMAN |
| 45 | GVDFESSEDDDDDPFMNTSSLR220000000010000000               | sp P49959 MRE11_HUMAN |
| 46 | TPEELDDSDFETEDFDVR200000000000                         | sp P35221 CTNA1_HUMAN |
| 47 | LEDDSEESDAEFDEGFK20020000000000                        | sp Q03468 ERCC6_HUMAN |
| 48 | SSGSPYGGGYGSGGGSGGYGSR2E+19                            | sp P51991 ROA3_HUMAN  |
| 49 | TVSQQSFDGVS LDSSGPEDR200200000000000000                | sp Q6BDS2 URFB1_HUMAN |
| 50 | KTSSDDESEEDDLLQR220002000000000000                     | sp Q9Y5J1 UTP18_HUMAN |
| 51 | KAEQGSEEEGEGEEEEEGGESK200000000000000000               | sp Q8NE71 ABCF1_HUMAN |
| 52 | FNDSEGDDTEETEDYR2000000000000000                       | sp Q9NYF8 BCLF1_HUMAN |
| 53 | SVASNQSEMEFSSLQDMPK2.002002E+19                        | sp Q8N163 CCAR2_HUMAN |
| 54 | EFSGPSTPTGTLEFEGGEVSLEGGK2E+23                         | sp Q09666 AHNK_HUMAN  |
| 55 | SVAVSDEEEVEEEAER200020000000000000                     | sp Q9Y6X9 MORC2_HUMAN |
| 56 | VGGSDEEASGIPSR200000000000                             | sp Q9NQ55 SSF1_HUMAN  |
| 57 | SASPDDDLGSSNWEAADLGNEER2E+21                           | sp 000193 SMAP_HUMAN  |
| 58 | YLSADSGDADSDADLGS AVK2.002000002E+19                   | sp Q15361 TTF1_HUMAN  |
| 59 | SQSPAASDCSSSSSASLPSSGR2E+21                            | sp 095817 BAG3_HUMAN  |
| 60 | SQSSEGVSSLS SPSNSLETQS QLSLR220000000000000000         | sp 095155 UBE4B_HUMAN |
| 61 | YLSADSGDADSDADLGS AVK2.002E+19                         | sp Q15361 TTF1_HUMAN  |
| 62 | GLVAAYSGDSNNEELVER20020000000000                       | sp P52756 RBM5_HUMAN  |
| 63 | FEEESKEPVADEEEEDSDDDV EPI TEFR20000000000000           | sp P54105 ICLN_HUMAN  |
| 64 | ALDSNSLENDL SAPGR200000000000                          | sp Q32MZ4 LRRF1_HUMAN |
| 65 | GGPEGVAAQAVASAASAGPADAEMEEIFDDASPGK20000               | sp 060264 SMCA5_HUMAN |
| 66 | GTGQSDSDIWD TALIK200000000000000000                    | sp Q16637 SMN_HUMAN   |
| 67 | SASPDDDLGSSNWEAADLGNEER2E+23                           | sp 000193 SMAP_HUMAN  |
| 68 | EEASDDMMEGDEAVVR20001000000000                         | sp 075643 U520_HUMAN  |
| 69 | SQASMV INSDT DDEEEVSAALTLAHLK2.02E+19                  | sp Q14676 MDC1_HUMAN  |
| 70 | TASQEGCQELTQEQR2000000000000000                        | sp 043933 PEX1_HUMAN  |
| 71 | GTLSDSEIETNSATSTIFGK200000000000000000                 | sp Q8WXG6 MADD_HUMAN  |
| 72 | SLAALDALNTDDEENDEEEYEAWK2000000000000000               | sp P55081 MFAP1_HUMAN |
| 73 | SEDEDSLEEAGSPAPGPCPR2.00002E+20                        | sp Q8TBB5 KLDC4_HUMAN |
| 74 | KLSSDAPAQDTGSSAAAVETDASR2E+21                          | sp Q7Z4S6 KI21A_HUMAN |
| 75 | SFNYS PNSTSEVSSTSASK200000000000000000                 | sp Q5VT52 RPRD2_HUMAN |
| 76 | SQSSDTEQQSPTS GGGK200000000000000000                   | sp P23588 IF4B_HUMAN  |
| 77 | EEQTDTSDGESVTHHIR2022000000000000                      | sp P36915 GNL1_HUMAN  |
| 78 | DESCYD NAEAAFS DDEEDLNSK200000000000                   | sp Q68E01 INT3_HUMAN  |
| 79 | EGEELGEGERPEEDAAALELSSDEAVEVEEVIEESR220000000000000000 | sp Q6NZI2 PTRF_HUMAN  |
| 80 | SASSDTSEELNSQDSPPK200000000000000000                   | sp 014745 NHRF1_HUMAN |
| 81 | SSSVGSSSSYPI SPAVSR200000000000000000                  | sp Q15149 PLEC_HUMAN  |
| 82 | SVASNQSEMEFSSLQDMPK200200000000000000                  | sp Q8N163 CCAR2_HUMAN |
|    |                                                        | sp P01891 1A68_HUMAN  |
|    |                                                        | sp P10316 1A69_HUMAN  |
| 83 | GGSYSQAASSDSAQGS DVSLTACK200000000000000000            | sp P01892 1A02_HUMAN  |
|    |                                                        | sp P05534 1A24_HUMAN  |
|    |                                                        | sp P30447 1A23_HUMAN  |
|    |                                                        | sp Q09160 1A80_HUMAN  |
| 84 | MVIQGPSSPQGEAMVTDVLEDQK200000000000000000              | sp Q12888 TP53B_HUMAN |
| 85 | QKSDAEEDGGTVS QEEEDR200000000000000000                 | sp P27824 CALX_HUMAN  |
| 86 | NQGGYGGSSSSSYGSGR20000000                              | sp P09651 ROA1_HUMAN  |
| 87 | GQESSDQE QVDVESIDFSK220000000000000000                 | sp Q96JM3 CHAP1_HUMAN |
| 88 | SPTMEQAVQTASAHL PAPA AVGR2.1E+21                       | sp Q8ND56 LS14A_HUMAN |
| 89 | NHSVNEEEQEEQEGESEDWEQV GPR20000000000000               | sp Q14694 UBP10_HUMAN |
| 90 | LFDEEEDSSEKLFDDSDER2200000000000000                    | sp 043719 HTSF1_HUMAN |

|     |                                                       |                       |
|-----|-------------------------------------------------------|-----------------------|
|     |                                                       | sp P05534 1A24_HUMAN  |
|     |                                                       | sp Q09160 1A80_HUMAN  |
| 91  | GGSYSQAASSDSAQGSVDVSLTACK20000000000000               | sp P30447 1A23_HUMAN  |
|     |                                                       | sp P01891 1A68_HUMAN  |
|     |                                                       | sp P01892 1A02_HUMAN  |
|     |                                                       | sp P10316 1A69_HUMAN  |
| 92  | SVASNQSEMEFSSLQDMPK2.00200201E+19                     | sp Q8N163 CCAR2_HUMAN |
|     |                                                       | sp P49792 RBP2_HUMAN  |
|     |                                                       | sp Q7Z3J3 RGPD4_HUMAN |
| 93  | LNQSGTSGVTDEESDVTQEEER2002000000000000                | sp A6NKT7 RGPD3_HUMAN |
|     |                                                       | sp P0DJ0 RGPD1_HUMAN  |
|     |                                                       | sp P0DJ1 RGPD2_HUMAN  |
|     |                                                       | sp P01891 1A68_HUMAN  |
|     |                                                       | sp P10316 1A69_HUMAN  |
|     |                                                       | sp P01892 1A02_HUMAN  |
| 94  | GGSYSQAASSDSAQGSVDVSLTACK2002000000                   | sp P05534 1A24_HUMAN  |
|     |                                                       | sp P30447 1A23_HUMAN  |
|     |                                                       | sp Q09160 1A80_HUMAN  |
| 95  | SDAEDGGTVSQEEEDR200000000020000000                    | sp P27824 CALX_HUMAN  |
| 96  | LLEDSEESSEETVSR200200000000                           | sp O60231 DHX16_HUMAN |
| 97  | EEENADSDDEGELQDLLSQDWR2000000000000000                | sp Q96NB3 ZN830_HUMAN |
| 98  | DYEIESQNPLASPTNTLLGSAK200000000000                    | sp Q7Z417 NUFP2_HUMAN |
| 99  | EEQTDTSDGESVTHHIR2002000000000000                     | sp P36915 GNL1_HUMAN  |
| 100 | QKSDAEEDGGTVSQEEEDR200000000020000000                 | sp P27824 CALX_HUMAN  |
| 101 | VPVRPPQQYSDDDDYEDDEEDDVQNTNSALR2E+23                  | sp Q92560 BAP1_HUMAN  |
| 102 | SQLQALHIGLDSSSIGSGPGDAEADDFPESR2.0002E+20             | sp O75116 ROCK2_HUMAN |
| 103 | SSSEDAESLAPR220000000000                              | sp Q4G0J3 LARP7_HUMAN |
| 104 | DGGSGNSTIIVSR200000000000                             | sp Q7Z6Z7 HUWE1_HUMAN |
| 105 | AESPESAIESTQSTPQK2000000000000000                     | sp Q9NTI5 PDS5B_HUMAN |
| 106 | QSPNSSAAASVSR2000000000000000                         | sp Q9H1B7 I2BPL_HUMAN |
| 107 | KPVLPALTINPTIAEGSPSTSEGASEANLVDLQK2000000000000000    | sp P36507 MP2K2_HUMAN |
| 108 | ETEEQSDSAEQGDPAGEGK2000000000000000                   | sp O95361 TRI16_HUMAN |
| 109 | TPLSSLSATSNNSTVACIDR20000000000000                    | sp P00533 EGFR_HUMAN  |
| 110 | TGSNIGASSDISLDEQYK2.00002E+19                         | sp P22059 OSBP1_HUMAN |
| 111 | SSLGQSASETEEDTVSVSK2020000000000000                   | sp Q13435 SF3B2_HUMAN |
| 112 | TGSNIGASSDISLDEQYK200200000000000000                  | sp P22059 OSBP1_HUMAN |
| 113 | TAAGEYDSVSESEDEEMLEIR202020000100000                  | sp Q9BZE4 NOG1_HUMAN  |
| 114 | SSSNDVDEETAESDTPVLEK200002002000000000                | sp Q99590 SCAFB_HUMAN |
| 115 | AADSDDGAVSAPAASDGGVSK200000000000000000               | sp Q96GM8 TOE1_HUMAN  |
| 116 | SPSDSSTASTPVAEQIER2000000000000000                    | sp Q16643 DREB_HUMAN  |
| 117 | LSEGSQPAEEEEEDQETPSR200200000000000000                | sp Q9UKV3 ACINU_HUMAN |
| 118 | TPLSSLSATSNNSTVACIDR22000000000000                    | sp P00533 EGFR_HUMAN  |
| 119 | AESSDGAESEEEEEAQEEVK2000200000000000                  | sp Q5T8D3 ACBD5_HUMAN |
| 120 | TASGSSVTSLDGTR2020000000000000                        | sp Q92597 NDRG1_HUMAN |
| 121 | SSSVGSSSSYPIPAVSR200200000000000000                   | sp Q15149 PLEC_HUMAN  |
| 122 | NQGGYGGSSSSSYGSGR200000000000                         | sp P09651 ROA1_HUMAN  |
| 123 | VVDYSQFQESDDADEDYGR200000000000                       | sp Q9H1E3 NUCKS_HUMAN |
| 124 | TINNQHVSVEQDNDQPDYDSVASDEDTDLETTASK200200000000000000 | sp Q14161 GIT2_HUMAN  |
| 125 | SSGSETEQVVDVSDR2200000000000000                       | sp O95251 KAT7_HUMAN  |
| 126 | SVASNQSEMEFSSLQDMPK2.002E+19                          | sp Q8N163 CCAR2_HUMAN |
| 127 | TAAGEYDSVSESEDEEMLEIR2020200000000000                 | sp Q9BZE4 NOG1_HUMAN  |
| 128 | SDSSGGYNLSDI IQSPSSTGLLK2E+20                         | sp Q9P2D0 IBTK_HUMAN  |
| 129 | GQESSDQEQVDVESIDFSK220000000000000000                 | sp Q96JM3 CHAP1_HUMAN |

|     |                                                       |                       |
|-----|-------------------------------------------------------|-----------------------|
| 130 | NQGGYGGSSSSSYGSGR20000000000                          | sp P09651 ROA1_HUMAN  |
| 131 | NSLLAGDDDTMSVISGISSR2002002000                        | sp Q8N3U4 STAG2_HUMAN |
| 132 | VTNDISPESSPGVGR20000000000                            | sp Q15154 PCM1_HUMAN  |
|     |                                                       | sp Q641Q2 FA21A_HUMAN |
| 133 | LTDEDFSPFGSGGLFSGGK20000000000000                     | sp Q5SNT6 FA21B_HUMAN |
|     |                                                       | sp Q9Y4E1 FA21C_HUMAN |
| 134 | DWEDDSDEDMSNFDR20000000000                            | sp Q15185 TEBP_HUMAN  |
| 135 | ALSSDSILSPAPDAR22000000000000                         | sp Q8IVT2 MISP_HUMAN  |
| 136 | KAEDSDSEPEPEDNVR2020000000000                         | sp Q9H0D6 XRN2_HUMAN  |
| 137 | HDSIPAADTFEDLSDVEGGGSEPTQR20000000000000              | sp O95671 ASML_HUMAN  |
|     |                                                       | sp P08238 HS90B_HUMAN |
| 138 | IEDVGSDEEDDSGKDK200000000000                          | sp Q58FF8 H90B2_HUMAN |
|     |                                                       | sp Q16643 DREB_HUMAN  |
| 139 | SPSDSSTASTPVAEQIER20000000000000000000                | sp Q8N163 CCAR2_HUMAN |
| 140 | SVASNQSEMEFSSLQDMPK2.002002E+19                       | sp Q9Y3T9 NOC2L_HUMAN |
| 141 | DLFDLNSSEEDDTGFSER2000000000000000                    | sp O00566 MPP10_HUMAN |
| 142 | KDDNDEEEEDIDFFEDIDSDEDEGGLFGSK20000000000000          | sp Q99543 DNJC2_HUMAN |
| 143 | ELSEESEDEELQLEEFMLK20020000000000000000               | sp P51114 FXR1_HUMAN  |
| 144 | KDELSDWSLAGEDDR20020000000000                         | sp Q6PKG0 LARP1_HUMAN |
| 145 | NTFTAWSDEESDYEIDDR2000000000000000                    | sp P23588 IF4B_HUMAN  |
| 146 | TGSESSQTGTSTTSSR22000000000000                        | sp Q9UHB6 LIMA1_HUMAN |
| 147 | EGHSLEMENENLVENGADSDEDDNSFLK200000000000              | sp O75448 MED24_HUMAN |
| 148 | LLSSNEDDANILSSPTDR200000000000000000                  | sp P01891 1A68_HUMAN  |
|     |                                                       | sp P10316 1A69_HUMAN  |
|     |                                                       | sp P01892 1A02_HUMAN  |
| 149 | GGSYSQAASSDSAQGSVSLTACK2000000000000000               | sp P05534 1A24_HUMAN  |
|     |                                                       | sp P30447 1A23_HUMAN  |
|     |                                                       | sp Q09160 1A80_HUMAN  |
| 150 | EELMSSDLEETAGSTSIPK12200000000000000000               | sp O00567 NOP56_HUMAN |
| 151 | DWEDDSDEDMSNFDR20001000000                            | sp Q15185 TEBP_HUMAN  |
| 152 | AFVEDSEDEDGAGEGSSLLQK20000000000000000000             | sp Q8N9T8 KRI1_HUMAN  |
| 153 | LPSGGAASPTGSAVDIR20000020000000000000                 | sp Q09666 AHNK_HUMAN  |
| 154 | DYLLSESEDEGDNDGER2020000000000000                     | sp Q9BVJ6 UT14A_HUMAN |
| 155 | ESPRPLQLPGAEGPAISDGEEGGEPGAGGGAAGAAGAGR2E+39          | sp Q6PKG0 LARP1_HUMAN |
| 156 | SSSPAPADIAQTVQEDLR22000000000000000000                | sp Q13283 G3BP1_HUMAN |
| 157 | GESAADSDGWSAPSDLR20000200000000                       | sp Q9BUL5 PHF23_HUMAN |
| 158 | VDSEGDSENDDAAGDFR20000200000000000000                 | sp O43823 AKAP8_HUMAN |
| 159 | FASDDEHDEHDENGATGPVK20000000000000000000              | sp P05455 LA_HUMAN    |
| 160 | AQSTDSLGTSGSLQSK20000000000000000000                  | sp Q15276 RABE1_HUMAN |
| 161 | YGLLAN TEDPTEMASLDSDEETVFESR2002000000000000          | sp Q9BVV8 CSO24_HUMAN |
| 162 | TPAAAAAMNLASPR2000                                    | sp Q9UQ35 SRRM2_HUMAN |
| 163 | EEQTDTSDGESVTHHIR2200000000000000                     | sp P36915 GNL1_HUMAN  |
| 164 | FIIGSVSEDNSEDEISNLVK20000000000000                    | sp Q13085 ACACA_HUMAN |
| 165 | NWEDEDFYSDDDTFLDR20000000000000                       | sp Q9BWU0 NADAP_HUMAN |
| 166 | LSEGSQPAEEEEEDQETPSR20000000000000000000              | sp Q9UKV3 ACINU_HUMAN |
| 167 | SSSPAPADIAQTVQEDLR20000000000000000000                | sp Q13283 G3BP1_HUMAN |
|     |                                                       | sp E9PAV3 NACAM_HUMAN |
| 168 | VQGEAVSNIQENTQTPTVQEESEEEVEDETGVEVK200000000000000000 | sp Q13765 NACA_HUMAN  |
|     |                                                       | sp Q9Y6R9 CCD61_HUMAN |
| 169 | LGSGGSGDGPSVSWSR20020000000000000000                  | sp Q3YEC7 RABL6_HUMAN |
| 170 | DDPSDV TDEDEGPAEPPPPPK20020000000000000000            | sp Q8ND56 LS14A_HUMAN |
| 171 | SPTMEQAVQTASAHL PAPA AVGR2E+21                        | sp O60841 IF2P_HUMAN  |
| 172 | KQSFDDNDSEELDKDSK20000020000000000000                 | sp Q8N163 CCAR2_HUMAN |
| 173 | SVASNQSEMEFSSLQDMPK2.00200201E+19                     | sp Q6KC79 NIPBL_HUMAN |
| 174 | YAEISSDEDNDSDEAFESSR22000000000000000000              |                       |

|     |                                                 |                       |
|-----|-------------------------------------------------|-----------------------|
| 175 | TSDSDQQAYLVQR200000000000                       | sp Q96CV9 OPTN_HUMAN  |
| 176 | DSGSEDFLMEDDDSDYGSSK2.02E+21                    | sp Q9H1E3 NUCKS_HUMAN |
| 177 | SSGSETEQVVFSDR20200000000000                    | sp 095251 KAT7_HUMAN  |
| 178 | GTLDEEDEEADSDTDDIDHR2000000000                  | sp Q9HCN4 GPN1_HUMAN  |
| 179 | DSSGQEDETQSSNDDPSQSVASQDAQEIIRPR2E+30           | sp Q8N108 MIER1_HUMAN |
| 180 | GLVAAYSGSDNNEELVER200000000000                  | sp P52756 RBM5_HUMAN  |
| 181 | SPSVSPSKQPVSTSSK20200000000000                  | sp Q96JG6 CC132_HUMAN |
| 182 | LLSSNEDDANILSSPTDR2000000000000000              | sp 075448 MED24_HUMAN |
| 183 | VAGEAAETDSEPEPEPEPTAAPR2020000000000000         | sp Q6QNY0 BL1S3_HUMAN |
| 184 | SSGSETEQVVFSDR2202000000000000                  | sp 095251 KAT7_HUMAN  |
| 185 | GTLSDSEIETNSATSTIFGK2000000000000000            | sp Q8WXG6 MADD_HUMAN  |
| 186 | SSSVGSSSSYPISPAISR220020000000000000            | sp Q15149 PLEC_HUMAN  |
| 187 | TGVTSTSDSEEGDDQEGEK2020000000000000             | sp 075475 PSIP1_HUMAN |
| 188 | DDSPDEVSTFTVQPPPSR200000000000000000            | sp Q8N328 PGBD3_HUMAN |
| 189 | SPSPGNHTSNSSNASNATVVPQNSSAR2.02E+28             | sp Q9BTA9 WAC_HUMAN   |
| 190 | APSVANVGSCHDLK2000000000000000                  | sp P21333 FLNA_HUMAN  |
| 191 | STGSATSLASQGER200000000000                      | sp Q5SW79 CE170_HUMAN |
| 192 | TGSESSQTGTSTTSSR2000000000000000                | sp P23588 IF4B_HUMAN  |
| 193 | LNSGGGLSEELGSAR2000000000000000                 | sp Q96KQ7 EHMT2_HUMAN |
| 194 | SSGTASSVAFTPLQGLEIVNPQAAEK2.0000002E+23         | sp Q8WWY3 PRP31_HUMAN |
| 195 | KPATPAEDDEDDIDLFGSDNEEEDKEAQLR2000000000000000  | sp P29692 EF1D_HUMAN  |
| 196 | IQQESSGEEDSDLSPEER2200000000000000              | sp P41236 IPP2_HUMAN  |
| 197 | EESSEDENEVSNILR2200000000000000                 | sp Q6NXS1 IPP2M_HUMAN |
| 198 | SLDSDESEDEEDDYQK2002000000000000                | sp Q01804 OTUD4_HUMAN |
| 199 | FSDSEGEETVPEPR2020000000000000                  | sp Q13442 HAP28_HUMAN |
| 200 | SPGSPVGEFTGSPPK2000000000000000                 | sp Q13286 CLN3_HUMAN  |
| 201 | LKSEDGVEGDLGETQSR2000000000000000               | sp P35611 ADDA_HUMAN  |
| 202 | SPTPPSSAGLGSNSAPPIDSR2.02E+22                   | sp Q09666 AHNK_HUMAN  |
| 203 | FSLCSDNLEGISEGPSNR200200000000000000            | sp Q8IWX8 CHERP_HUMAN |
| 204 | NSLLAGGDDTMSVISGISSR2002000                     | sp Q14C86 GAPD1_HUMAN |
| 205 | DSHSSEDEASSQTDLSQTISK2.2E+19                    | sp Q8N3U4 STAG2_HUMAN |
| 206 | AADSSSDGAEESPAEPGAPR220200000000000000          | sp Q5JTV8 TOIP1_HUMAN |
| 207 | GQVIIISDSDDDDDER20200000000                     | sp P16383 GCFC2_HUMAN |
| 208 | NPWSDDESKSESLEETEPVVIPR2.00020202E+21           | sp Q7Z333 SETX_HUMAN  |
| 209 | DDDDIDLFGSDDEESEEAK200000000000                 | sp Q02880 TOP2B_HUMAN |
| 210 | VAAETQSPSLFGSTK2000000000                       | sp P24534 EF1B_HUMAN  |
| 211 | SPVGLSSDGISSSSSSSR200000000000000000            | sp Q9UKX7 NUP50_HUMAN |
| 212 | AGGASPAASSTAQPPTQHR2000000000000000             | sp 060583 CCNT2_HUMAN |
| 213 | KPATPAEDDEDDIDLFGSDNEEEDK2E+23                  | sp Q8IU81 I2BP1_HUMAN |
| 214 | FTMDLSDSDFDFDEK1000200002000000                 | sp P29692 EF1D_HUMAN  |
| 215 | YSQGDDGSSSSGSSVAGSQSTLTK2E+25                   | sp P11388 TOP2A_HUMAN |
| 216 | GTGSGGQLQDLDCSSDDEGAAQNSTKPSATK2.0000000022E+29 | sp Q9UH99 SUN2_HUMAN  |
| 217 | EKEISDDEAEEKGEK200000000000                     | sp P08240 SRPR_HUMAN  |
| 218 | NKPGPNIESGNEDDASFK200000000000                  | sp P08238 HS90B_HUMAN |
| 219 | MPCESPPEADTPTSTR2000000000000000                | sp 060841 IF2P_HUMAN  |
| 220 | TGSESSQTGTSTTSSR2000000000000000                | sp P46013 KI67_HUMAN  |
| 221 | TVSSPPTSPRPGSAATVSASTSNIIPR2.2E+22              | sp P23588 IF4B_HUMAN  |
| 222 | LAAAETAVSPR2000                                 | sp 076094 SRP72_HUMAN |
| 223 | IEDVGSDEEDDSGK2000000000                        | sp Q9BUH6 PAXX_HUMAN  |
| 224 | ESSANNSVSPESLR20000000                          | sp P08238 HS90B_HUMAN |
| 225 | LSVPTSDEEDEVPAKPR2000000000000000               | sp Q58FF8 H90B2_HUMAN |
| 226 | EESSEEEDEDEEEEEEEK2000000000000000              | sp Q04726 TLE3_HUMAN  |
|     |                                                 | sp Q8NE71 ABCF1_HUMAN |
|     |                                                 | sp P35659 DEK_HUMAN   |

|     |                                                 |                       |
|-----|-------------------------------------------------|-----------------------|
|     |                                                 | sp P49792 RBP2_HUMAN  |
|     |                                                 | sp Q7Z3J3 RGPD4_HUMAN |
| 227 | LNQSGTSVGTDEESDVTQEEER220020000000000000        | sp A6NKT7 RGPD3_HUMAN |
|     |                                                 | sp P0DJD0 RGPD1_HUMAN |
|     |                                                 | sp P0DJD1 RGPD2_HUMAN |
| 228 | EGHSLEMENENLVENGADSDEDDNSFLK1.00000000002E+22   | sp Q9UHB6 LIMA1_HUMAN |
| 229 | DNLLDTYSADQGDSSEGGTLAR20000000000               | sp Q6ZRP7 QSOX2_HUMAN |
|     |                                                 | sp Q641Q2 FA21A_HUMAN |
| 230 | TPSDDEEDNLFAPPK2020000000000000                 | sp Q9Y4E1 FA21C_HUMAN |
|     |                                                 | sp Q14745 NHRF1_HUMAN |
| 231 | SASSDTSEELNSQDSPPK2022000000000000              | sp P35251 RFC1_HUMAN  |
| 232 | I IYDSDESEETLQVK2020000000000                   | sp P00264 PGRC1_HUMAN |
| 233 | GDQPAASGSDDDDEPPPLPR200000000000                | sp Q9Y4E1 FA21C_HUMAN |
| 234 | GLFSDEEDSEDLFSSQSASNLK2E+19                     | sp P49768 PSN1_HUMAN  |
| 235 | AAVQELSSSILAGEDPEER2200000000000                | sp Q14134 TRI29_HUMAN |
| 236 | SKSGSEEVLCDSICGNK2000000000000000               | sp Q8IYB3 SRRM1_HUMAN |
| 237 | KETESAEADNLDLEK2020000000000000                 | sp P54725 RD23A_HUMAN |
| 238 | EDKSPSEESAPTTSPESVSGSVPSSGSSGR2E+27             | sp Q02447 SP3_HUMAN   |
| 239 | IGPPSPGDDEEEAAAAAGAPAAAGATGLASALGAPNR2E+36      | sp P46937 YAP1_HUMAN  |
| 240 | QASTDAGTAGALTPQHVR2000000000000000              | sp Q9Y3B9 RRP15_HUMAN |
| 241 | DHFYSDDAIEADSEGAEPCK2.00000002E+19              | sp Q08J23 NSUN2_HUMAN |
| 242 | ESTQLSPADLTEGKPTDPSK2000000000000000            | sp Q9UK58 CCNL1_HUMAN |
| 243 | LSPTPSMQDGLDLPSETDLR2E+19                       | sp P29692 EF1D_HUMAN  |
| 244 | KPATPAEDDEDDIDILFGSDNEEDK200000000              | sp P02545 LMNA_HUMAN  |
| 245 | SVGGSGGSGFDNLVTR200000000000000000              | sp Q9Y4C8 RBM19_HUMAN |
| 246 | SKPASDYLNFDSDSGQSEEEGAGEDLEEEASLEPK2.020002E+25 | sp Q12888 TP53B_HUMAN |
| 247 | NSPEDLGLSLTGDSCK2000000000000000                | sp P46100 ATRX_HUMAN  |
| 248 | RPTETNPVTSNSDEECNETVK20000000000                | sp Q13442 HAP28_HUMAN |
| 249 | SLDSDESEDEEDDYQQK200000200000000000             | sp Q8N163 CCAR2_HUMAN |
| 250 | SVASNQSEMEFSSLQDMPK20000100000000000            | sp P51858 HDGF_HUMAN  |
| 251 | KGNAEGSSDEEGKLVIDEPAK2200000000000000           | sp Q12888 TP53B_HUMAN |
| 252 | MVIQGPSSPQGEAMVTDVLEDQK1.0000002E+23            | sp Q32MZ4 LRRF1_HUMAN |
| 253 | ALDSNSLENDLAPGR2000000000000000                 | sp Q9H1E3 NUCKS_HUMAN |
| 254 | DSGSDDFLMEDDDSDYGSSK2.02000001000002E+21        | sp Q5SW79 CE170_HUMAN |
| 255 | STGSATSLASQGER2020000000000000                  | sp Q14134 TRI29_HUMAN |
| 256 | SKSGSEEVLCDSICGNK200000000000000000             | sp Q9P2I0 CPSF2_HUMAN |
| 257 | EADIDSSDESIEEDIDQPSAHK220020000000000000        | sp Q7Z6Z7 HUWE1_HUMAN |
| 258 | AGSSTPGDAPPAVAEVQGR22000000000000000            | sp P05783 K1C18_HUMAN |
| 259 | LLEDGEDFNLGDALDSSNSMQTIQK2000000000             | sp Q9BPX3 CND3_HUMAN  |
| 260 | TLHCEGTEINSDEQESK200000000                      | sp Q9UHW9 S12A6_HUMAN |
| 261 | LTSIGSDEDEETETYQEK200020000000000000            | sp Q4G0J3 LARP7_HUMAN |
| 262 | SSSEDAESLAPR2200000000000000                    | sp Q13283 G3BP1_HUMAN |
| 263 | SSSPAPADIAQTVQEDLR200000000000000000            | sp Q9NTJ3 SMC4_HUMAN  |
| 264 | REEGPPPPSPDGASSDAEPEPPSGR200002000000000000     | sp Q14976 GAK_HUMAN   |
| 265 | DESEVSDEGGSPISSEGEPR2.002E+19                   | sp Q3YEC7 RABL6_HUMAN |
| 266 | AAQQDSDSGEALGGNPMVAGFQDDVDLEDQPR2.02E+28        | sp P50750 CDK9_HUMAN  |
| 267 | KGSQITQQSTNQRSR2000000000000000                 | sp Q8N163 CCAR2_HUMAN |
| 268 | SVASNQSEMEFSSLQDMPK200000000000000000           | sp Q9Y5J1 UTP18_HUMAN |
| 269 | KTSSDDESEEDDLLQR200002000000000000              | sp Q8N163 CCAR2_HUMAN |
| 270 | SVASNQSEMEFSSLQDMPK2.00200001E+19               | sp Q15021 CND1_HUMAN  |
| 271 | YQPLASTASDNDFVTPEPR2000000000000                | sp Q96ST2 IWS1_HUMAN  |
| 272 | NQASDSENEELPKPR2020000000000                    | sp Q75475 PSIP1_HUMAN |
| 273 | TGVTSTSDSEEGDDQEGEK2.00000202E+20               | sp P13861 KAP2_HUMAN  |
| 274 | VADAKGDSSEEDLEVPVPSR202000000000000000          | sp Q9UQR1 ZN148_HUMAN |
| 275 | QPLEQNQTI SPLSTYEESK2000000000000               |                       |

|     |                                                        |           |             |
|-----|--------------------------------------------------------|-----------|-------------|
| 276 | VENSPQVDGSPPGLEGLGGIGEK2000000000000000                | sp Q8WVB6 | CTF18_HUMAN |
| 277 | QIDSSPVGGETDETTVSQNYR200000000000000000                | sp O15027 | SC16A_HUMAN |
| 278 | VALSDDETKETENMR20000000000000                          | sp Q15054 | DPOD3_HUMAN |
| 279 | TINNQHVESQDNDQPDYDSVASDEDTDLETTASK30000200000000000000 | sp Q14161 | GIT2_HUMAN  |
| 280 | ILQSQDFSLDSSAEEGLR2200000000                           | sp Q5T8I3 | F102B_HUMAN |
| 281 | YYSDSDELTVQR20200000000000                             | sp Q8NFC6 | BD1L1_HUMAN |
| 282 | TGSNISGASSDISLDEQYK20020020000000000000                | sp P22059 | OSBP1_HUMAN |
| 283 | GTGSGGQLQDLDCSSSDDEGAAQNSTKPSATK2.0000000002E+29       | sp P08240 | SRPR_HUMAN  |
| 284 | FIIGSVSEDNSEDEISNLVK20000020000000000000               | sp Q13085 | ACACA_HUMAN |
| 285 | APEPLGPADQSELGPEQLEAEVGESSDEEPVESR220000000000         | sp Q969G5 | PRDBP_HUMAN |
| 286 | TEFLDLNSPLSPSPR2000                                    | sp Q8NCF5 | NF2IP_HUMAN |
| 287 | ASSHSSQTQGGGSVTK20000000000000000000                   | sp P02545 | LMNA_HUMAN  |
| 288 | GDSIEEILADSEDEEDNEEEER2000000000000000                 | sp Q5JTH9 | RRP12_HUMAN |
| 289 | TSSGTSLSAMHSSGSSGK20000000000000000000                 | sp Q12888 | TP53B_HUMAN |
| 290 | GLFSDEEDSEDLFSSQSASK20000000000000000000               | sp Q641Q2 | FA21A_HUMAN |
|     |                                                        | sp Q5SNT6 | FA21B_HUMAN |
| 291 | VDENENCSSLGSPSEPPQTLDLVR2000000000000000               | sp Q96P16 | RPR1A_HUMAN |
| 292 | SLLSHEFQDETDTTEETLYSSK20200000000000                   | sp O75976 | CBPD_HUMAN  |
| 293 | LLEDSEESSEETVSR200220000000                            | sp O60231 | DHX16_HUMAN |
| 294 | SPPSTGSTYGSSQK2000000000000000                         | sp Q9Y2W1 | TR150_HUMAN |
| 295 | NTFTAWSDEESDYEIDDR20002000000000                       | sp Q6PKG0 | LARP1_HUMAN |
| 296 | GGPEGVAAQAVASAASAGPADAEMEEIFDDASPGK1000000020000       | sp O60264 | SMCA5_HUMAN |
| 297 | TSSTCSNESLSVGGTSVTPR2.2E+19                            | sp O60343 | TBCD4_HUMAN |
| 298 | TPLSSLSATSNNSTVACIDR20000000000000                     | sp P00533 | EGFR_HUMAN  |
| 299 | TSSGTSLSAMHSSGSSGK20000000000000000000                 | sp Q12888 | TP53B_HUMAN |
| 300 | LPSPTSPFSSLSQDQAATSK22000000000000000000               | sp Q8WWI1 | LMO7_HUMAN  |
| 301 | ATGGLCLLGAYADSDDDNDVSEK20000000000000                  | sp Q8N3X1 | FNBP4_HUMAN |
| 302 | AETSEGSAPSAPVPEASAPK2000                               | sp P51608 | MECP2_HUMAN |
| 303 | MESEGGADDSAEGLDLLDDDDNEDRGDDQLELIK1.000000002E+34      | sp P07910 | HNRPC_HUMAN |
| 304 | SQLQALHIGLDSSSIGSGPGAADDFPESR2.002E+19                 | sp O75116 | ROCK2_HUMAN |
| 305 | INSSGESGDESDEFLQSR220000002000000000                   | sp O60841 | IF2P_HUMAN  |
| 306 | GGGSCSGSAGGGGSGSLPSQR20000000000000000000              | sp O15234 | CASC3_HUMAN |
| 307 | FTMDLSDSDFSDFDKTDDEDFVPSDASPPK1.000200002E+30          | sp P11388 | TOP2A_HUMAN |
| 308 | MQSLQLDCVAVPSSR2000000000000000                        | sp Q13546 | RIPK1_HUMAN |
| 309 | REEGPPPPSPDGASSDAEPEPPSGR20000000000000                | sp Q9NTJ3 | SMC4_HUMAN  |
| 310 | MNEEISSDSESESLAPR22020000000000                        | sp O43818 | U3IP2_HUMAN |
| 311 | SPVGKSPSTGSTYGSSQK2.00002E+19                          | sp Q9Y2W1 | TR150_HUMAN |
| 312 | SPAGPAATPAQAQAASTPR2E+19                               | sp Q13428 | TCOF_HUMAN  |
| 313 | SSLGQSASETEEDTVSVSK2000000000000000                    | sp Q13435 | SF3B2_HUMAN |
| 314 | TTSSANNPNLMYQDECDR20000000000000000000                 | sp Q92841 | DDX17_HUMAN |
| 315 | SIGSAVDQGNESIVAK20000000000000000000                   | sp Q9H0H5 | RGAP1_HUMAN |
| 316 | IEDVGSDEEDDSGKDKK20000000000000                        | sp P08238 | HS90B_HUMAN |
|     |                                                        | sp Q58FF8 | H90B2_HUMAN |
|     |                                                        | sp Q6PEY2 | TBA3E_HUMAN |
|     |                                                        | sp Q9BQE3 | TBA1C_HUMAN |
| 317 | TIGGGDDSFNTFFSETGAGK2000000000000000                   | sp Q71U36 | TBA1A_HUMAN |
|     |                                                        | sp Q13748 | TBA3C_HUMAN |
|     |                                                        | sp P68363 | TBA1B_HUMAN |
| 318 | EEASDDDMEGDEAVVR2000000000000000                       | sp O75643 | U520_HUMAN  |
| 319 | TSAAACAVTDLSDSDDFDEK2002000000                         | sp Q9NQZ2 | SAS10_HUMAN |
| 320 | TASISSPSEGTPTVGSYGCTPQSLPK2E+21                        | sp Q6PKG0 | LARP1_HUMAN |
| 321 | INSSGESGDESDEFLQSR220020002000000000                   | sp O60841 | IF2P_HUMAN  |
| 322 | GQDTVAIEGFTDEEDTESGGEGQYR2000000200000000              | sp Q2KHR3 | QSER1_HUMAN |

|     |                                                     |                       |
|-----|-----------------------------------------------------|-----------------------|
| 323 | EAESESSGGEEEDENIEVVYSK2. 2E+19                      | sp P55010 IF5_HUMAN   |
| 324 | SAGEEEDGPVLTDEQK2000000000000000                    | sp Q66PJ3 AR6P4_HUMAN |
| 325 | NSQEDSEDSKDKVK20000000000                           | sp Q9H1E3 NUCKS_HUMAN |
| 326 | TGVTSTSDSEEGDDQEGEK2202000000000000                 | sp 075475 PSIP1_HUMAN |
| 327 | TVSSPPTSPRPGSAATVSASTSNIIPPR2. 00002E+21            | sp 076094 SRP72_HUMAN |
| 328 | EETESSEGEAAAGGGAK202200000000000000                 | sp Q96G23 CERS2_HUMAN |
| 329 | GTGQSDSDIWDITALIK2000000000000000                   | sp Q16637 SMN_HUMAN   |
|     |                                                     | sp P05534 1A24_HUMAN  |
|     |                                                     | sp P30447 1A23_HUMAN  |
| 330 | GGSYSQAASSDSAQGSVSLTACK2002000000                   | sp P01891 1A68_HUMAN  |
|     |                                                     | sp P01892 1A02_HUMAN  |
|     |                                                     | sp Q09160 1A80_HUMAN  |
|     |                                                     | sp P10316 1A69_HUMAN  |
| 331 | CGSGPVHISGQHLVAVEEDAESDEEEEDVK20000000000           | sp P06748 NPM_HUMAN   |
| 332 | NEGSESAPEGQAQQR2020000000000000                     | sp P67809 YBOX1_HUMAN |
| 333 | MADHLEGLSSDDEETSTDITNFNLEK220000000000000000        | sp Q9Y5B6 PAXB1_HUMAN |
| 334 | REEGPPPPSPDGASSDAEPEPPSGR20000000000000             | sp Q9NTJ3 SMC4_HUMAN  |
| 335 | KVEEDLKADEPSSEESDLEIDK200200000000                  | sp P50502 F10A1_HUMAN |
| 336 | ENEEDGTGNWYSSDEDEGGSSVTSILK220000000000000000       | sp Q9UPT8 ZC3H4_HUMAN |
| 337 | NLEDDSDDEEDFFLR20000000000                          | sp 075379 VAMP4_HUMAN |
| 338 | YSEFTSTSGTGHNQTR20000000000                         | sp P48960 CD97_HUMAN  |
| 339 | SGSPAPETTNEVPFAQHSSLSR2. 02E+24                     | sp O15047 SET1A_HUMAN |
| 340 | NEGSESAPEGQAQQR2000000000000000                     | sp P67809 YBOX1_HUMAN |
| 341 | SSVAAPEKSSNDSVDEETAESDTSPVLEK2. 2002E+21            | sp Q99590 SCAFB_HUMAN |
| 342 | NFSCGSVEFDEADLESRLR20020000000000000000             | sp Q86SQ0 PHLB2_HUMAN |
| 343 | SEAEDDEDYVPYVPLR20000000000000000000                | sp Q9UJV9 DDX41_HUMAN |
| 344 | FNSESESGSEASSPDYFGPPAK2. 0202002E+20                | sp Q9BW71 HIRP3_HUMAN |
| 345 | TGSTSSKEDDYESDAATIVQK2E+21                          | sp Q5T4S7 UBR4_HUMAN  |
| 346 | LGAGEGGEASVSPEK20000                                | sp Q13428 TCOF_HUMAN  |
| 347 | SESLIDASEDSQLEAAIR200000002000000000                | sp O94888 UBXN7_HUMAN |
| 348 | KPPAPPSPVQSQSPSTNWSPAVPVK2. 000002E+19              | sp Q8IYB3 SRRM1_HUMAN |
| 349 | EVLYDSEGLSGEER2000200000                            | sp Q9H7N4 SFR19_HUMAN |
| 350 | SSSISEEKGSDDEKPR200000002000000000                  | sp Q9UKV3 ACINU_HUMAN |
| 351 | TESPATAAETASEELDNR20000000000000000000              | sp Q9NTJ3 SMC4_HUMAN  |
| 352 | KVEEDLKADEPSSEESDLEIDK2200200000000                 | sp P50502 F10A1_HUMAN |
| 353 | AEDSDSEPEPEDNVR2020000000000000                     | sp Q9H0D6 XRN2_HUMAN  |
| 354 | SPEPEATLTFPFLDK20000000000000000000                 | sp Q9UPQ0 LIMC1_HUMAN |
| 355 | NVLSDSVSSDDEFFDAR220000000000                       | sp Q9BZ71 PITM3_HUMAN |
| 356 | GPSPSPPTPPAAAAPAEQAPR22000000000000000000           | sp Q86VQ1 GLC11_HUMAN |
| 357 | SDGAPASDSKPGSSEAAPSSK2E+21                          | sp P80723 BASP1_HUMAN |
| 358 | SESTDLSGLSPSEVTAIQCK20200000000000000000            | sp O60318 GANP_HUMAN  |
| 359 | SVTSNQSDGTQESCESPDVLR20000000000000000000           | sp Q9UGV2 NDRG3_HUMAN |
| 360 | DIEVLSEDTDYEEDEVTK2002000000000000                  | sp Q4LE39 ARI4B_HUMAN |
| 361 | LEGSDVDSELEDR200020000000                           | sp Q92614 MY18A_HUMAN |
| 362 | DSELSDTDSGCCLGQSESDK20000000000000000000            | sp Q96T88 UHRF1_HUMAN |
| 363 | TQQLHPVLQKPSVFGNDSDDDETSVSESLQR20000000000000000000 | sp Q9H0G5 NSRP1_HUMAN |
| 364 | EYDSGDTDEIIAMK20020000000000                        | sp Q76FK4 NOL8_HUMAN  |
| 365 | EEGSSDEISSGVGSESEGLNSPVK2. 200022E+22               | sp P52701 MSH6_HUMAN  |
| 366 | SSQSEGIFLGESEDESVR202000000000                      | sp Q9BYW2 SETD2_HUMAN |
| 367 | YEDEVFGDSEPELDEESEDEVEEQEER2. 00000002E+20          | sp Q9UN86 G3BP2_HUMAN |
| 368 | VEEQEADEEDVSEEAESK2000000000                        | sp Q9H3N1 TMX1_HUMAN  |
| 369 | FTDKDQPSGSEGEDDDAEALK20200000000000000000           | sp Q9NXG2 THUM1_HUMAN |
| 370 | KQSSSEISLAVER2000000000000000                       | sp P48634 PRC2A_HUMAN |
| 371 | LPSTSDDCPAIGTPLR20000000000000000000                | sp Q15648 MED1_HUMAN  |



|     |                                               |                       |
|-----|-----------------------------------------------|-----------------------|
| 372 | IQQFDDGGSDDEEDIWEEK2000000000                 | sp Q5H9R7 PP6R3_HUMAN |
| 373 | GSPSGGSTAEASDTLSIR200000000000000000          | sp Q9P206 K1522_HUMAN |
| 374 | SDSSGGYNLSDIIQSPSSTGLLK2. 2E+21               | sp Q9P2D0 IBTK_HUMAN  |
| 375 | ENSGPVENGVSdqEGEEQAR20000000000               | sp Q8TEQ6 GEMI5_HUMAN |
| 376 | GDQVLNFSDAEDLIDDSK200000000000                | sp Q96EZ8 MCRS1_HUMAN |
| 377 | IVEPEVVGESDSEVEGDWR202000000000               | sp P55081 MFAP1_HUMAN |
| 378 | KSPVFSDESDLDLFDISK200020002000000000          | sp 000566 MPP10_HUMAN |
| 379 | SLSNSNPDISGTPTSPDDEV2. 02E+19                 | sp Q96N67 DOCK7_HUMAN |
| 380 | KTSAVSSPLLDQQR20002000000000                  | sp Q5T200 ZC3HD_HUMAN |
| 381 | FNDSEGDDTEETEDYR200002000000000               | sp Q9NYF8 BCLF1_HUMAN |
| 382 | KGSSGNASEVSVACLTER200000000000000000          | sp Q69YQ0 CYTSA_HUMAN |
| 383 | SLSNSNPDISGTPTSPDDEV200000000000000000        | sp Q96N67 DOCK7_HUMAN |
| 384 | EEVGAGYNSEDEYEAAR200000000000                 | sp Q96G74 OTUD5_HUMAN |
| 385 | KTSSDDESEEDDLLQR20200020000000000000          | sp Q9Y5J1 UTP18_HUMAN |
| 386 | SPTAALNESLVECPK2000000000000000               | sp Q53EZ4 CEP55_HUMAN |
| 387 | VLNTGSDVEEAVADALK20000000000000               | sp 075122 CLAP2_HUMAN |
| 388 | SDSFENPVLQQR2000000000000000                  | sp P12956 XRCC6_HUMAN |
| 389 | GNAEGSSDEEGKLVIDEPK220000000000000000         | sp P51858 HDGF_HUMAN  |
| 390 | KSSADTEFSDECTTAER220000000000000000           | sp Q9H6S0 YTDC2_HUMAN |
| 391 | DELNEELIQEESSEDEGEYEEVR22000000000000         | sp 060524 NEMF_HUMAN  |
| 392 | YQDEVFGGFVTEPQEESEEEVEEPEER200000000000       | sp Q13283 G3BP1_HUMAN |
| 393 | LSSSATLLNSPDR20000                            | sp Q14244 MAP7_HUMAN  |
| 394 | TELNSSAESEQPLDK2200000000000000               | sp Q9Y5B6 PAXB1_HUMAN |
| 395 | IGDEYAEDSSDEEDIR220000000                     | sp Q14137 BOP1_HUMAN  |
| 396 | DEEQSEADAGSGPPTPGPTTLGPK2000200000000000      | sp Q6ZRS2 SRCAP_HUMAN |
| 397 | EKPDSDDLDIASLVTA200000000000000000            | sp Q86V48 LUZP1_HUMAN |
| 398 | ELHENVLDKELEENDSENSEFEDDGSEK20020000002000    | sp 043719 HTSF1_HUMAN |
| 399 | SISLGDSEGPVATLAQPLR20000000000000000000       | sp 043379 WDR62_HUMAN |
| 400 | ANSGVDLDSSGEFASIEK2000000220000000000         | sp Q92766 RREB1_HUMAN |
| 401 | SDVQEESEGSDDDNKDSAAFEDNEVQDEFLEK2. 000002E+22 | sp Q9UIG0 BAZ1B_HUMAN |
| 402 | GSPDGLQTKGPSAPK20000000000000000000           | sp Q8IZL8 PELP1_HUMAN |
| 403 | ALSSDSILSPAPDAR20000200000000                 | sp Q8IVT2 MISP_HUMAN  |
| 404 | AESSDSGAEESEEEEAQEEVK22020002000000000000     | sp Q5T8D3 ACBD5_HUMAN |
| 405 | SIQDLTVTGTEPGQVSSR20000000000000000000        | sp 043318 M3K7_HUMAN  |
| 406 | MNEISSDSESESLAPR1000022020000000000           | sp 043818 U3IP2_HUMAN |
| 407 | EDSSEEEEEIDDEEIER22000000000000000000         | sp P55081 MFAP1_HUMAN |
| 408 | SGSEEEAELSLSLAR20200000000000000000           | sp Q8IV50 LYSM2_HUMAN |
| 409 | DSGSDDFLMEDDDSDYGSSK2. 02000000000002E+21     | sp Q9H1E3 NUCKS_HUMAN |
| 410 | YESQLSTNEEKVDTDDR2000000000000000             | sp Q13433 S39A6_HUMAN |
| 411 | TSFVSGSDDELGPIR20020000000000                 | sp Q9NRY4 RHG35_HUMAN |
| 412 | GLVAAYSGESDSEEEQER2020000000                  | sp P98175 RBM10_HUMAN |
| 413 | TADSSSEDEEEYVVEK20022020000000000000          | sp P45973 CBX5_HUMAN  |
| 414 | QHYSSEDEPDDNPVLDLDR22000000000000000000       | sp Q8NFC6 BD1L1_HUMAN |
| 415 | SDAEEDGGTVSQEEEDR200000000                    | sp P27824 CALX_HUMAN  |
| 416 | GQESSDQEQVDVESIDFSK22200000000000000000       | sp Q96JM3 CHAP1_HUMAN |
| 417 | LSVPTSDEEDEVPAKPR22000000000000000000         | sp Q8NE71 ABCF1_HUMAN |
| 418 | EESDGEYDEFGR200000000000                      | sp 095218 ZRAB2_HUMAN |
|     |                                               | sp P05534 1A24_HUMAN  |
|     |                                               | sp P30447 1A23_HUMAN  |
| 419 | KGGYSQAASSDSAQSDVSLTACKV20020000000           | sp P01891 1A68_HUMAN  |
|     |                                               | sp P01892 1A02_HUMAN  |
|     |                                               | sp Q09160 1A80_HUMAN  |
|     |                                               | sp P10316 1A69_HUMAN  |
| 420 | IACEEFSDEEEGEGGR202000000000                  | sp Q13547 HDAC1_HUMAN |

|     |                                              |                       |
|-----|----------------------------------------------|-----------------------|
| 421 | KGSVSHDTVQPR20000000000                      | sp Q96D71 REPS1_HUMAN |
| 422 | ENYSDSEEDDDVASSR2020000000000000             | sp Q9Y2U8 MAN1_HUMAN  |
| 423 | YDSGDGKSDDLVVDVSNEDPATPR2.00002E+22          | sp Q04726 TLE3_HUMAN  |
| 424 | SPVFSDESDLDFDISK200020002000000000           | sp 000566 MPP10_HUMAN |
| 425 | VFPEPTESGDEGEELGLPLLSTR2000000000000000      | sp Q9BUR4 WAP53_HUMAN |
| 426 | TADSSSEDEEEYVVEK200022200000000000           | sp P45973 CBX5_HUMAN  |
| 427 | EELMSSDLEETAGSTSIPK2000000000000000          | sp 000567 NOP56_HUMAN |
| 428 | GESAPTLSTSPSPSPSPTSPSPTLGR2000000            | sp Q9H330 TM245_HUMAN |
| 429 | DLGHPVEEEDLESGDQEDEDDESEDPGK2000000000000000 | sp 060763 USO1_HUMAN  |
| 430 | SYSSPDITQAIQEEEK2000000000000000             | sp P40818 UBP8_HUMAN  |
| 431 | TEDGGWEWSDEFDEESEEGK2000000000000000         | sp 095747 OXSR1_HUMAN |
| 432 | RQSDLVQCGVTSPSSAEATGK2E+19                   | sp Q9HC52 CBX8_HUMAN  |
| 433 | NQGGYGGSSSSSYGSGR200000000                   | sp P09651 ROA1_HUMAN  |
| 434 | LCDFGSASHVADNDITPYLVSR300000                 | sp Q13523 PRP4B_HUMAN |
| 435 | TPAAAAAMNLASPR10002000                       | sp Q9UQ35 SRRM2_HUMAN |
| 436 | SKGSDISDEEAAQSK200020020000000000            | sp Q5T200 ZC3HD_HUMAN |
| 437 | KPISDNSFSSDEEQSTGPIK22000000000000           | sp 060293 ZC3H1_HUMAN |
| 438 | STSATDTHHVMAR2000000000000000                | sp 014874 BCKD_HUMAN  |
| 439 | KETESAEADNLDDLEK2000000000000000             | sp Q8IYB3 SRRM1_HUMAN |
| 440 | KPEDVLDDDDAGSAPLK200000                      | sp P35613 BASI_HUMAN  |
| 441 | VDPSLMEDSDDGSLPTK20000000000                 | sp 015258 RER1_HUMAN  |
| 442 | QVAGDAPVEQATAETASVHR200000                   | sp Q92766 RREB1_HUMAN |
| 443 | ERDSELSDTDSGCCLGQSESDK2000200000000000       | sp Q96T88 UHRF1_HUMAN |
| 444 | GPPDFSSDEEREPTPVLGSGAAAAGR2.2E+21            | sp P42166 LAP2A_HUMAN |
| 445 | SLYASSPGGVYATR2000000000                     | sp P42167 LAP2B_HUMAN |
| 446 | NSPGSQVASNPR200000000000                     | sp P08670 VIME_HUMAN  |
| 447 | RPDYAPMESSDEEDEFQFIK1022000000000000         | sp Q9H0D6 XRN2_HUMAN  |
| 448 | SPVFSDESDLDFDISK200020000000000000           | sp P55081 MFAP1_HUMAN |
| 449 | LLSSESEDEEELIPLAQR2020000000000000           | sp 000566 MPP10_HUMAN |
| 450 | SEDEDSLEEAGSPAPGPCPR2E+20                    | sp Q96AY2 EME1_HUMAN  |
| 451 | NQGGYGGSSSSSYGSGR2000                        | sp Q8TBB5 KLDC4_HUMAN |
| 452 | LMHNASDSEVDQDDVVEWK2020000000000000          | sp P09651 ROA1_HUMAN  |
| 453 | GGSYSQAASSDSAQGSVSLTACK2E+20                 | sp Q9H2P0 ADNP_HUMAN  |
| 454 | SAQGTGFELGQLQSIR2000000000000000             | sp Q09160 1A80_HUMAN  |
| 455 | SVSSPTSNTPTPTK20000000000000                 | sp P05534 1A24_HUMAN  |
| 456 | ALSSDSILSPAPDAR20000000000000                | sp P30447 1A23_HUMAN  |
| 457 | LTSIGSDEDEETETYQEK2002000000000000           | sp P01891 1A68_HUMAN  |
| 458 | GLSGEEEDDEPDCCNDER2000000000000000           | sp P01892 1A02_HUMAN  |
| 459 | SPLSPTETFSWPDVR2002000000000000              | sp P10316 1A69_HUMAN  |
| 460 | SPVFSDESDLDFDISK200000002000000000           | sp Q9C0B5 ZDHC5_HUMAN |
| 461 | KGAGDGSDEEVDGK200000000                      | sp Q5M775 CYTSB_HUMAN |
| 462 | TPHDILEDINASPEMR200000                       | sp Q8IVT2 MISP_HUMAN  |
| 463 | TSSFTEQLDEGTPNR2000000000000000              | sp Q9UHW9 S12A6_HUMAN |
| 464 | SPSSDLDTAEGDDFELLDQSELSQLDPASSR2.2E+30       | sp Q6P158 DHX57_HUMAN |
| 465 | TSSTLDSEGTFSYR2000000000000000               | sp A1L390 PKHG3_HUMAN |
| 466 | KKPSTDEQTSSAEEDVPTCYLNVLSNSR2.2E+20          | sp 000566 MPP10_HUMAN |
| 467 | SSGNSSSSGSGSGSTSAGSSSPGAR200000              | sp P35579 MYH9_HUMAN  |
|     |                                              | sp Q9Y6Q9 NCOA3_HUMAN |
|     |                                              | sp Q13439 GOGA4_HUMAN |
|     |                                              | sp Q86VR2 F134C_HUMAN |
|     |                                              | sp Q92609 TBCD5_HUMAN |
|     |                                              | sp Q8N556 AFAP1_HUMAN |
|     |                                              | sp Q12797 ASPH_HUMAN  |

|     |                                                        |                       |
|-----|--------------------------------------------------------|-----------------------|
| 468 | GPPDFSSDEEREPTPVLGSGAAAAGR2. 2E+21                     | sp P42167 LAP2B_HUMAN |
|     |                                                        | sp P42166 LAP2A_HUMAN |
| 469 | DDDDIDLFGSDDEEESEEAKR200000000000                      | sp P24534 EF1B_HUMAN  |
| 470 | SVTSNQSDGTQESCESPDVLR2000000000000                     | sp Q9UGV2 NDRG3_HUMAN |
| 471 | AASSSSPGSPVASSPSR2000000000                            | sp Q92538 GBF1_HUMAN  |
| 472 | VLQSDSETEDTNASPEK20200000000000                        | sp Q9HAW4 CLSPN_HUMAN |
| 473 | YAEISSDEDNDSDEAFESSR22000002000000000                  | sp Q6KC79 NIPBL_HUMAN |
| 474 | AKPVVSDDDSEEEQEEDR20002000000000                       | sp P51532 SMCA4_HUMAN |
| 475 | LPSSPVYEDAASF200000000000                              | sp Q14247 SRC8_HUMAN  |
| 476 | TSAACAVTDLSDSDFDEK2002002000000                        | sp Q9NQZ2 SAS10_HUMAN |
| 477 | VLGSEGEDEALSPAK200000000020000                         | sp P18858 DNLI1_HUMAN |
| 478 | TASGSSVSLDGT2000000000000                              | sp Q92597 NDRG1_HUMAN |
| 479 | VEMYSGSDDDDFNKLK1020200000000000                       | sp 060841 IF2P_HUMAN  |
| 480 | VEMYSGSDDDDFNKLK20200000000000                         | sp 060841 IF2P_HUMAN  |
| 481 | QDDSPSGASYGQDYDLSPSR2000000000000000                   | sp Q9NYV4 CDK12_HUMAN |
| 482 | TLSTDAAPQPLATQAYSLVGPEVR2. 2E+23                       | sp Q9H6B4 CLMP_HUMAN  |
| 483 | SEEDNEIESEEEVQPK20000000200000000                      | sp P52701 MSH6_HUMAN  |
| 484 | VEESTGDPFGFSDDESPLVSSK200000000000                     | sp Q7Z5K2 WAPL_HUMAN  |
|     |                                                        | sp Q6NXS1 IPP2M_HUMAN |
| 485 | IQQESSGEEDSDLSPEER2000000000000                        | sp P41236 IPP2_HUMAN  |
|     |                                                        | sp Q9NYV4 CDK12_HUMAN |
| 486 | QDDSPSGASYGQDYDLSPSR200000000000200                    | sp P17812 PYRG1_HUMAN |
| 487 | SGSSPDSEITELK220000000000                              | sp Q02880 TOP2B_HUMAN |
| 488 | SESDLTEPVVIPR2020000000000000                          | sp Q7Z460 CLAP1_HUMAN |
| 489 | QSSGSATNVASTPDNR2000000000000000                       | sp Q9NZ63 CI078_HUMAN |
| 490 | RGDSESEEDQDSEEV2020000000000000                        | sp 095251 KAT7_HUMAN  |
| 491 | SSGSETEQVDFSDR202000000002000                          | sp Q86U70 LDB1_HUMAN  |
| 492 | KMSGGSTMSSGGGNTNNSK2E+19                               | sp 060832 DKC1_HUMAN  |
| 493 | AGLESGAEPGDGSDTTK20000000200000                        | sp Q6ZRS2 SRCAP_HUMAN |
| 494 | DEEQSEADAGSPPTPGPTTLGPK2. 0000020002E+20               | sp P16989 YBOX3_HUMAN |
| 495 | NYAGEEEEEEGSGSSEGFDPATDR202200000000000                | sp Q9H8G2 CAAP1_HUMAN |
| 496 | STDSSVSGSLQQETK2000000000000000                        | sp Q9ULX3 NOB1_HUMAN  |
| 497 | KDSDDDGGGWITPSNIK2000000000000000                      | sp Q9NZI8 IF2B1_HUMAN |
| 498 | QGSPVAAGAPAK200000000000                               | sp Q9P1Y6 PHRF1_HUMAN |
| 499 | SGSESEDDGETLLEVAGTQK2. 02002E+22                       | sp Q8NE71 ABCF1_HUMAN |
| 500 | KLSVPTSDEEDEVPAKPR200220000000000000                   | sp Q9UFC0 LRWD1_HUMAN |
| 501 | ACASPSAQVEGSPVAGSDGSQPAVK2E+22                         | sp Q96AY2 EME1_HUMAN  |
| 502 | LLSESEDEEEFIPLAQR2202000000000000                      | sp Q96SB4 SRPK1_HUMAN |
| 503 | GSAPHSEDLPEQEEIILGSDDEQEDPNDYCK20000000000000          | sp Q2KHR3 QSER1_HUMAN |
| 504 | GQDTVAIEGFTDEEDTESGEGQYR2. 0000000000002E+22           | sp Q9NYF8 BCLF1_HUMAN |
| 505 | AEGEWEDQEALDYFSDK2000                                  |                       |
| 506 | SPVGSQAPQAAAPAPAAHVAGNPGGDAAPAATGTAASLATAAGSEDAEK2E+47 | sp P16989 YBOX3_HUMAN |
| 507 | EEGPPPPSPDGASSDAEPEPPSGR200000200000000000             | sp Q9NTJ3 SMC4_HUMAN  |
| 508 | SASDTEELNSQDSPPK20000000000000                         | sp 014745 NHRF1_HUMAN |
| 509 | HCDSINDFGSESGGCGDSSPGPSASQGPR200000000000              | sp Q8TD19 NEK9_HUMAN  |
| 510 | THSTSSSLGSGESPF2000000000000000                        | sp Q9UGV2 NDRG3_HUMAN |
| 511 | DSPSKSSAEQTPEDTPNK20000000000000                       | sp 043493 TGON2_HUMAN |
| 512 | AEGEWEDQEALDYFSDKESGK20000000                          | sp Q9NYF8 BCLF1_HUMAN |
| 513 | DLFDLNSSEEDTEGFSER22000000000000                       | sp Q9Y3T9 NOC2L_HUMAN |
| 514 | GGGGQDNGLEGLGNSR200                                    | sp P08621 RU17_HUMAN  |
| 515 | VPVRPPQYSDDEDDYEDDEDDVQNTNSALR3000000000000000         | sp Q92560 BAP1_HUMAN  |
| 516 | LQELESCSLGSDTDVR20002000000000                         | sp Q14C86 GAPD1_HUMAN |
| 517 | IHDLEDDLEMSDASDASGEEGGR1220020020000000                | sp P35269 T2FA_HUMAN  |
| 518 | GLNTSQESDDDILDESSPEGTQK2. 002E+20                      | sp Q5VV41 ARHGG_HUMAN |

|     |                                                    |                       |
|-----|----------------------------------------------------|-----------------------|
| 519 | GVPAGNSDTEGGQPGR20000000000                        | sp Q9UKV3 ACINU_HUMAN |
| 520 | EAEQAASEAAGDTPGSSPSSLYEEPLGQPPR2. 2E+21            | sp Q86TC9 MYPN_HUMAN  |
| 521 | IACDEEFSDEDEGEGGR202000000000                      | sp Q92769 HDAC2_HUMAN |
| 522 | YQPLASTASDNDFVTPEPR200200000000000                 | sp Q15021 CND1_HUMAN  |
| 523 | REEGPPPPSPDGASSDAEPEPPSGR200000200000000000        | sp Q9NTJ3 SMC4_HUMAN  |
| 524 | GFSDSGGGPPAK200000000000                           | sp Q9H307 PININ_HUMAN |
| 525 | VEEDLKADEPSSEESDLEIDK200200000000                  | sp P50502 F10A1_HUMAN |
| 526 | KVELSESEEDKGGK202000000000                         | sp Q8IZP2 ST134_HUMAN |
| 527 | RPDHSGGSPSPTSEPAR200000000000                      | sp Q8IYB3 SRRM1_HUMAN |
| 528 | REEGPPPPSPDGASSDAEPEPPSGR200002200000000000        | sp Q8TAD8 SNIP1_HUMAN |
| 529 | LLDLSdstsvASFPSADETDGNLPESR2. 2E+20                | sp Q9NTJ3 SMC4_HUMAN  |
|     |                                                    | sp Q13464 ROCK1_HUMAN |
|     |                                                    | sp P01891 1A68_HUMAN  |
|     |                                                    | sp P10316 1A69_HUMAN  |
| 530 | KGGSYSQAASSDSAQGSdvSLTACK2000000                   | sp P05534 1A24_HUMAN  |
|     |                                                    | sp P30447 1A23_HUMAN  |
|     |                                                    | sp Q09160 1A80_HUMAN  |
|     |                                                    | sp P01892 1A02_HUMAN  |
| 531 | KDSEGYSESPDLEFEYADTDK2E+19                         | sp Q5VSL9 STRP1_HUMAN |
| 532 | ALSSDSILSPAPDAR2000000000000                       | sp Q8IVT2 MISP_HUMAN  |
| 533 | SSSSPELQTLQDILGDPGDK2000000000000000000            | sp P49815 TSC2_HUMAN  |
| 534 | YVDEENSdGETSNHR2000000000                          | sp Q8N9T8 KRI1_HUMAN  |
| 535 | LGpGRPLTFPTSECTSDVEPDTR2000000000                  | sp Q8TDD1 DDX54_HUMAN |
| 536 | AETPTESVSEPEVATK2000002000000000                   | sp P18858 DNLI1_HUMAN |
| 537 | TSSTLDSEGTFNSYR220000000000000                     | sp Q92609 TBCD5_HUMAN |
| 538 | SPSEESAPTTSPESVSGVPSSGSSGR200000000000000000       | sp P54725 RD23A_HUMAN |
| 539 | KNSSTDQGSDEEGSLQK20000020000000000                 | sp Q12789 TF3C1_HUMAN |
| 540 | ASPDQNAStHTPQSSVK200000000000000000                | sp Q14677 EPN4_HUMAN  |
| 541 | GEDSAEETEAKPAVVAPAPVVEAVSTPSAafPSDATAEQGPILTK2E+38 | sp Q12906 ILF3_HUMAN  |
| 542 | SEDESETEDEEEKSQEDQEQK2020000000000000000           | sp P25205 MCM3_HUMAN  |
| 543 | REESPMdVDQPSPSAQDTQSIASDGTpQGEK2. 00000002E+28     | sp Q7Z6Z7 HUWE1_HUMAN |
| 544 | ENSPSSQSAGLSSINK2000000000000000                   | sp Q9H2Y7 ZN106_HUMAN |
| 545 | FTMDLSDDEDFSDfDEKTDDEDFVPSDASPPK2. 00002000002E+26 | sp P11388 TOP2A_HUMAN |
| 546 | GESENAGTNQETR2000000000000                         | sp Q08170 SRSF4_HUMAN |
| 547 | SPDLGEYDPLTQADSDEEDDLVLNLQK2002000000000000        | sp A2RU67 K1467_HUMAN |
| 548 | SQSLPNSLDYtQTSdPGR200000000000000000               | sp Q96TC7 RMD3_HUMAN  |
| 549 | WAHDKfSGEEGEIEDDESgTENR200000000000000000          | sp Q9Y2W1 TR150_HUMAN |
| 550 | NLGSINTELQDVQR2000000000000                        | sp 075396 SC22B_HUMAN |
| 551 | KGSGSEQEGEDEEGGER202000000000000000                | sp Q6PD62 CTR9_HUMAN  |
| 552 | SGSSSPDSEITELK2022200000000000                     | sp P17812 PYRG1_HUMAN |
| 553 | TEESPASDEAGEK200200000000                          | sp P05114 HMGn1_HUMAN |
| 554 | ESTQLSPADLTegKPTDPSK2E+19                          | sp Q08J23 NSUN2_HUMAN |
| 555 | FSGEEGEIEDDESgTENR2000000                          | sp Q9Y2W1 TR150_HUMAN |
| 556 | VLSDSEDEEKDADVPGTSTR20200000000000000000           | sp Q8WWQ0 PHIP_HUMAN  |
| 557 | IEDVGSDEEDDSGKDKK2000002000000                     | sp P08238 HS90B_HUMAN |
|     |                                                    | sp Q58FF8 H90B2_HUMAN |
| 558 | NQGGYGGSSSSSYGSGR2000000                           | sp P09651 ROA1_HUMAN  |
| 559 | VQMTSPSSTGSPMFK2000000000000                       | sp P49790 NU153_HUMAN |
| 560 | DHSPTPSVFNSDEER2000000000000000                    | sp Q6UN15 FIP1_HUMAN  |
| 561 | VTTEIQLPSQSPVEEQSPASLSSLR200000000000000000        | sp Q8WWI1 LMO7_HUMAN  |
| 562 | VTNDISPESSPGVGR20020000000                         | sp Q15154 PCM1_HUMAN  |
| 563 | TDVSNFDEEFTGEAPTLSPPR20000                         | sp Q16512 PKN1_HUMAN  |
| 564 | GLRDSHSSEEDeASSQTdLSQTISK2. 022E+21                | sp Q5JTV8 TOIP1_HUMAN |
| 565 | GSAPHSEDLPEQEEIILGSDDDEQEDPNdYCK2E+32              | sp Q96SB4 SRPK1_HUMAN |

|     |                                                  |                       |
|-----|--------------------------------------------------|-----------------------|
| 566 | QVAEQGGDLSPAANR2000000                           | sp 094804 STK10_HUMAN |
| 567 | EELEQQTDGDCEDEEEENDGETPK2E+19                    | sp Q99442 SEC62_HUMAN |
| 568 | EEQTDSDGESVTHHIR20000000000                      | sp P36915 GNL1_HUMAN  |
| 569 | VIHFVSGETMEEYSTDEDEVDGLEK220000000000            | sp Q8N128 F177A_HUMAN |
| 570 | AAVGQESPGGLEAGNAK20000000000                     | sp Q29RF7 PDS5A_HUMAN |
| 571 | AQGSDEDKLQNSDDDEK200000002000000                 | sp Q8WVC0 LEO1_HUMAN  |
| 572 | AGMSSNQSISSPVLDVPR22000000000                    | sp Q9UQ35 SRRM2_HUMAN |
| 573 | TGSTSSKEDDYESDAATIVQK2000000000000000            | sp Q5T4S7 UBR4_HUMAN  |
| 574 | TQDPSSPGTTPPQAR20000000000                       | sp Q13112 CAF1B_HUMAN |
| 575 | WAHDKFSGEEGEIEDDESGTENR200000000002000000        | sp Q9Y2W1 TR150_HUMAN |
| 576 | TVSSPPTSPRPGSAATVSASTSNIIPR2. 2E+26              | sp 076094 SRP72_HUMAN |
| 577 | QFTSSSSIKGSSGLGGSSR2200000000000000              | sp Q04695 K1C17_HUMAN |
| 578 | VLSSTSEDEPGVVK20020000000000                     | sp Q8NI08 NCOA7_HUMAN |
| 579 | NSQEDSEDESKDKV20020000000                        | sp Q9H1E3 NUCKS_HUMAN |
| 580 | SPSSDSWTCADTSTER2000000000000000                 | sp Q8N6T3 ARFG1_HUMAN |
| 581 | GSGDTSSLIDPDTLSSELR2000000000000000              | sp Q9Y608 LRRF2_HUMAN |
| 582 | NSADDEELTNDLSLQSK200200000000                    | sp 094880 PHF14_HUMAN |
| 583 | AGEPNSPDAEEANSPDVTAGCDPAGVHPPR200000000000000000 | sp Q08J23 NSUN2_HUMAN |
| 584 | VADPDHDHTGFLTEYVATR20300000                      | sp P28482 MK01_HUMAN  |
| 585 | EAEQAASEAAGDTPGSSPSSLYEEPLGQPPR2. 002E+20        | sp Q86TC9 MYPN_HUMAN  |
| 586 | MPQDGSDEDEEWPTLEK20000000000000                  | sp Q13895 BYST_HUMAN  |
| 587 | HLDGEEDGSSDQSQASGTTGGR2000000000000000           | sp Q9UNF1 MAGD2_HUMAN |
| 588 | ESEDKPEIEDVGSDEEEEEK20000000                     | sp P07900 HS90A_HUMAN |
| 589 | GAVENEEDLPELSDSGDEAAWEDEDDADLPHGK2. 02E+21       | sp 060678 ANM3_HUMAN  |
| 590 | LENEGSEDEDIETDVLVSPQALK20000000000000000000      | sp 060502 OGA_HUMAN   |
|     |                                                  | sp P01891 1A68_HUMAN  |
|     |                                                  | sp P10316 1A69_HUMAN  |
| 591 | GGSYSQAASSDSAQGS DVSLTACK2E+20                   | sp P05534 1A24_HUMAN  |
|     |                                                  | sp P30447 1A23_HUMAN  |
|     |                                                  | sp Q09160 1A80_HUMAN  |
|     |                                                  | sp P01892 1A02_HUMAN  |
| 592 | TAESQTPTPSATSFSGK20000000000000                  | sp P55265 DSRAD_HUMAN |
| 593 | LQEEGGGSDEEETGSPSEDGMQSAR20000000000000000000    | sp Q13610 PWP1_HUMAN  |
| 594 | VPSSDEEVVEEPQSR22000000000000                    | sp Q9C0C2 TB182_HUMAN |
| 595 | LEDEDDSDSELDSLK2020000000                        | sp Q9HCK8 CHD8_HUMAN  |
|     |                                                  | sp B5ME19 EIFCL_HUMAN |
| 596 | NEEDSEGSSDEDEDEDGVSAAATFLKK2. 0022E+22           | sp Q99613 EIF3C_HUMAN |
|     |                                                  | sp Q04726 TLE3_HUMAN  |
| 597 | DAPTSPASVASSSSTPSSK2000000000000000              | sp P58107 EPIPL_HUMAN |
| 598 | QVSASELHTSGILGPETLR20000000000000000000          | sp Q9UHD8 SEPT9_HUMAN |
| 599 | SFEVEEVETPNSTPPR2000000000000000                 | sp Q9Y2W1 TR150_HUMAN |
| 600 | FSGEEGEIEDDESGTENR200000000002000000             | sp Q9UIG0 BAZ1B_HUMAN |
| 601 | SDGACDSPSSDKENSSQIAQDHQK2. 00000202E+24          | sp P01891 1A68_HUMAN  |
|     |                                                  | sp P10316 1A69_HUMAN  |
|     |                                                  | sp P01892 1A02_HUMAN  |
| 602 | KGGSYSQAASSDSAQGS DVSLTACK2E+20                  | sp P05534 1A24_HUMAN  |
|     |                                                  | sp P30447 1A23_HUMAN  |
|     |                                                  | sp Q09160 1A80_HUMAN  |
|     |                                                  | sp Q7Z417 NUFP2_HUMAN |
| 603 | TIQNSSVSPTSSSSSSSSTGETQTQSSSR2E+19               | sp Q96S82 UBL7_HUMAN  |
| 604 | DMPGGFLFEGLSDDDDFHPNTR20000000000000             | sp P78415 IRX3_HUMAN  |
| 605 | SPPGAGGSPPGA AVAPSALQLSPAAAAAAHR2. 0000002E+32   | sp P07910 HNRPC_HUMAN |
| 606 | MESEGGADDSAEGLDLLDDDDNEDRGDDQLELIK2E+25          | sp Q92522 H1X_HUMAN   |
| 607 | AGGSAALSPSK20000                                 | sp P78415 IRX3_HUMAN  |
| 608 | SPPGAGGSPPGA AVAPSALQLSPAAAAAAHR2. 0000002E+32   |                       |

|     |                                             |                       |
|-----|---------------------------------------------|-----------------------|
| 609 | LHNENAEMDSOSSSGTETDLHGSLR202220000000000000 | sp Q9H832 UBE2Z_HUMAN |
| 610 | SSPVNNHHSPGQTPTLGQPEAR2.0000002E+21         | sp Q5SW79 CE170_HUMAN |
|     |                                             | sp Q96L14 C170L_HUMAN |
|     |                                             | sp P01891 1A68_HUMAN  |
|     |                                             | sp P10316 1A69_HUMAN  |
| 611 | GGSYSQAASSDSAQGSVDVSLTACK2000000000         | sp P01892 1A02_HUMAN  |
|     |                                             | sp P05534 1A24_HUMAN  |
|     |                                             | sp P30447 1A23_HUMAN  |
|     |                                             | sp Q09160 1A80_HUMAN  |
| 612 | KDDSDDESQSSTGK20000000000000                | sp O94874 UFL1_HUMAN  |
| 613 | TLLPWDSDESPEASPGPPGPR200200000000000000     | sp Q9UMN6 KMT2B_HUMAN |
| 614 | GSSQPNLSTSHSEQEYK200000000000000000         | sp O95208 EPN2_HUMAN  |
| 615 | EELMSSDLEETAGSTSIPK102000000000000000       | sp O00567 NOP56_HUMAN |
| 616 | TGSPGSPGAGGVQSTAK200200000000000000         | sp O43237 DC1L2_HUMAN |
| 617 | SGSSPDSEITELKFPSINH220000000000000000       | sp P17812 PYRG1_HUMAN |
| 618 | EEGRCSSDDDTDVMGLR222000000000000000         | sp Q96AQ6 PBIP1_HUMAN |
| 619 | GISSSNEGVEEPSK20000000000000                | sp Q9NXV6 CARF_HUMAN  |
| 620 | SISADDDLQESSR20000000000000                 | sp P18615 NELFE_HUMAN |
| 621 | KEDTAFSDWSEDEVPR2000002000000000            | sp Q5T200 ZC3HD_HUMAN |
| 622 | ESPGAAATSSSGPQAQHR200000000000000000        | sp Q7L2J0 MEPCE_HUMAN |
| 623 | DDAEESSEPEENVGNDTK2200000000000000          | sp Q13823 NOG2_HUMAN  |
| 624 | TIQEVLEEQSEDEDR20000000                     | sp P18858 DNLI1_HUMAN |
| 625 | SSAQADSGSSDDEAASEAR20220000000000           | sp Q12894 IFRD2_HUMAN |
| 626 | KPSLVSDLPWEGAAPQSPSFGSEDSGSPK200000         | sp Q13425 SNTB2_HUMAN |
|     |                                             | sp P01891 1A68_HUMAN  |
|     |                                             | sp P10316 1A69_HUMAN  |
| 627 | KGGSYSQAASSDSAQGSVDVSLTACK20000000000000    | sp P01892 1A02_HUMAN  |
|     |                                             | sp P05534 1A24_HUMAN  |
|     |                                             | sp P30447 1A23_HUMAN  |
|     |                                             | sp Q09160 1A80_HUMAN  |
| 628 | AASADSTTEGTPADGFTVLSTK220000000000000000    | sp O75367 H2AY_HUMAN  |
| 629 | GLVAAYSGESDSEEEQER20020200000000            | sp P98175 RBM10_HUMAN |
| 630 | LLEDSEESSEETVSR20002000000000               | sp O60231 DHX16_HUMAN |
| 631 | VVSDADSDSDAVSDK2000000200000000             | sp Q96ST2 IWS1_HUMAN  |
| 632 | SVASNQSEMEFSSLQDMPK2.002E+19                | sp Q8N163 CCAR2_HUMAN |
| 633 | VSALEEDMDDVESSEEEEEDEKLER2200000000000000   | sp Q8NAV1 PR38A_HUMAN |
| 634 | ESPEGSYTDANQEV200020000000000000            | sp Q5TON5 FBP1L_HUMAN |
| 635 | TVSSPPTSPRPGAATVSASTSNIIPR2.002E+25         | sp O76094 SRP72_HUMAN |
|     |                                             | sp P51812 KS6A3_HUMAN |
| 636 | AYSFCGTVEYMAPEVVNR200000000000000000        | sp Q15418 KS6A1_HUMAN |
|     |                                             | sp Q9UK32 KS6A6_HUMAN |
| 637 | FTDKDQPSGSEGEDDDAEALKK202000000000000000    | sp Q9NXG2 THUM1_HUMAN |
|     |                                             | sp Q641Q2 FA21A_HUMAN |
| 638 | LTDEDFSPFGSGGLFSGGK200000000000000000       | sp Q9Y4E1 FA21C_HUMAN |
|     |                                             | sp Q5SNT6 FA21B_HUMAN |
| 639 | SQSESSDEVTELDLSHGK220000000000000000        | sp Q86YS7 C2CD5_HUMAN |
|     |                                             | sp B5ME19 EIFCL_HUMAN |
| 640 | QPLLLSEDEEDTKR200000000000                  | sp Q99613 EIF3C_HUMAN |
|     |                                             | sp Q9UQ88 CD11A_HUMAN |
| 641 | DLLSDLQDISDSER200000                        | sp P21127 CD11B_HUMAN |
| 642 | MLSSDAITQEFMDLR200000000000000000           | sp Q9UPN3 MACF1_HUMAN |
| 643 | AQSSPAAPASLSAPEPASQAR200000000000000000     | sp Q8WUI4 HDAC7_HUMAN |
| 644 | NMGPPYGGGNYGPGSGGGYGGGR200000000000         | sp P22626 ROA2_HUMAN  |
| 645 | LQQAGLESPQGQPEPGAASPR20000                  | sp Q9H6F5 CCD86_HUMAN |

|     |                                                       |                       |
|-----|-------------------------------------------------------|-----------------------|
| 646 | YLLSQSSPAPLTAEEELR2000000000000                       | sp Q12792 TWF1_HUMAN  |
| 647 | VVNTDHGSPEQLQIPVTDSDGR200000000000000                 | sp Q6IQ49 SDE2_HUMAN  |
| 648 | SPSDSSTASTPVAEQIER2020000000000000000                 | sp Q16643 DREB_HUMAN  |
| 649 | DSSSTDSANEKPALIPR20202000000000000                    | sp Q9NUQ6 SPS2L_HUMAN |
| 650 | HPVYHPEEGGDEGGSGYSPPSK200000                          | sp 094986 CE152_HUMAN |
| 651 | VREDDSDDDGSDDEEIDESLAAQFLNSGNVR2.00002E+25            | sp Q14669 TRIPC_HUMAN |
| 652 | SPSGSAFGSQENLR200000000000000                         | sp Q96N67 DOCK7_HUMAN |
| 653 | SRSPLDKDTYPPSASVVGASVGGHR2.0000003E+23                | sp Q96T37 RBM15_HUMAN |
| 654 | FNSESESGSEASSPDYFGPPAK2.0202E+20                      | sp Q9BW71 HIRP3_HUMAN |
| 655 | NEGSESAPEGQAQQR20000000000                            | sp P67809 YBOX1_HUMAN |
| 656 | REEGPPPPSPDGASSDAEPEPPSGR2200000000000                | sp Q9NTJ3 SMC4_HUMAN  |
| 657 | GPPSSDSEPEAELER222020000000000                        | sp Q7Z4V5 HDGR2_HUMAN |
| 658 | TSSTCSNESLSVGGTSVTPR20000000000000000                 | sp 060343 TBCD4_HUMAN |
| 659 | RGPNYTSGYGTNSELSNPSETESER20000000                     | sp P51114 FXR1_HUMAN  |
| 660 | DASDGEDEKPLPPR200000000000000                         | sp 015357 SHIP2_HUMAN |
| 661 | TVSQSFDGVS LDSSGPEDR20000000000000000                 | sp Q6BDS2 URFB1_HUMAN |
| 662 | AGSSTPGDAPPAVAEVQGR20000000000000000                  | sp Q7Z6Z7 HUWE1_HUMAN |
| 663 | KEGITGPPADSSKPIGPDDAIDALSSDFTCGSPTAAGK20000000        | sp P20810 ICAL_HUMAN  |
| 664 | AALLAQYADVTDEEDEADEK20000000000                       | sp Q96MW1 CCD43_HUMAN |
| 665 | KEESEESDDDMGFLFD200000010000000                       | sp P05386 RLA1_HUMAN  |
| 666 | LPSGGAASPTGSAVDIR2000200000000000                     | sp P05387 RLA2_HUMAN  |
| 667 | LTSTSTSDTQININSAQR20000000000000000                   | sp Q09666 AHNK_HUMAN  |
| 668 | EESEEEEEDEDEEEEEEEKEK2E+19                            | sp Q8WU20 FRS2_HUMAN  |
| 669 | TPSSSSTLAYS PR2000000000000                           | sp P35659 DEK_HUMAN   |
| 670 | DKEVSDDEAEKEDK2000000000000                           | sp Q6Q0C0 TRAF7_HUMAN |
| 671 | EPTPSIASDISLP IATQELR2000020020000000000              | sp P07900 HS90A_HUMAN |
| 672 | IDEPSTPYHSMGDDDEDACSDTEATEAMAPDILAR200000000000000    | sp A0FGR8 ESYT2_HUMAN |
| 673 | RGPNYTSGYGTNSELSNPSETESER20020000000                  | sp P41236 IPP2_HUMAN  |
| 674 | TAFYNEDDSEEEQR2000000                                 | sp P51114 FXR1_HUMAN  |
| 675 | SPSLGSDLTFATR200000000000000                          | sp Q8WWQ0 PHIP_HUMAN  |
| 676 | QISSSTGCLSSPNATVQSPK2000000000000000                  | sp Q13425 SNTB2_HUMAN |
| 677 | GSAPHSESDLPEQEEEILGSDDDEQEDPNDYCK2.00000000000002E+28 | sp Q9Y6Y0 NS1BP_HUMAN |
| 678 | NESEDNKFSDSDDDFVQPR2002000000000                      | sp Q96SB4 SRPK1_HUMAN |
| 679 | SRSPTPPSSAGLGSNSAPPIDSR2.0202E+24                     | sp 015164 TIF1A_HUMAN |
| 680 | NHLSPQQGGATPQVSPCCR200000000000200000                 | sp Q8IWX8 CHERP_HUMAN |
| 681 | NQKPSQVNGAPGSPTEPAGQK2000000000                       | sp Q9H4L4 SEN3_HUMAN  |
| 682 | KNSTDLD SAPEDPTSPK200000000002000                     | sp Q9BQG0 MBB1A_HUMAN |
| 683 | MADHLEGLSSDDEETSTDITNFNLEK1.000000022E+26             | sp Q96RK0 CIC_HUMAN   |
| 684 | AEEPPSQLDQDTQVQDMDEGSDDEEEGQK10002000000000           | sp Q9Y5B6 PAXB1_HUMAN |
| 685 | SSPGQTPEEGAQALAEFAALHGPALR2E+25                       | sp Q15459 SF3A1_HUMAN |
| 686 | KKASSDSEDSSEEEEEVQGPPAK2.22020022E+21                 | sp Q14166 TTL12_HUMAN |
| 687 | AGMSSNQSISSPVLDVPR2002000000000                       | sp Q14978 NOLC1_HUMAN |
| 688 | QIDSSPVGGETDETTVSQNYR2000000000000000000              | sp Q9UQ35 SRRM2_HUMAN |
| 689 | RFSDSEGETVPEPR20200000000000                          | sp 015027 SC16A_HUMAN |
| 690 | RSSDPALIGLSTSVSDSNFSSEEPSR2E+24                       | sp Q13286 CLN3_HUMAN  |
|     |                                                       | sp Q8TEW0 PARD3_HUMAN |

|     |                                                    |                       |
|-----|----------------------------------------------------|-----------------------|
|     |                                                    | sp P30505 1C08_HUMAN  |
|     |                                                    | sp Q9TNN7 1C05_HUMAN  |
|     |                                                    | sp Q29960 1C16_HUMAN  |
|     |                                                    | sp Q07000 1C15_HUMAN  |
|     |                                                    | sp Q29963 1C06_HUMAN  |
| 691 | GGSCSQAASSNSAQGSDESLIACK2E+20                      | sp P30508 1C12_HUMAN  |
|     |                                                    | sp Q95604 1C17_HUMAN  |
|     |                                                    | sp P30510 1C14_HUMAN  |
|     |                                                    | sp P04222 1C03_HUMAN  |
|     |                                                    | sp Q29865 1C18_HUMAN  |
|     |                                                    | sp P30504 1C04_HUMAN  |
| 692 | DIDHETVVEEQIIGENSPDYSEYMTGK200000000000            | sp P25490 TYY1_HUMAN  |
| 693 | SEDESETEDEEEK2020000000                            | sp P25205 MCM3_HUMAN  |
| 694 | QDPVTYISETDEEDDFMCK2020000000000                   | sp P35251 RFC1_HUMAN  |
| 695 | SLSDSESDSK2000000000                               | sp Q13185 CBX3_HUMAN  |
| 696 | ENASPAPGTTAEAMSR20000000000000                     | sp P46379 BAG6_HUMAN  |
| 697 | NSSNTSVGSPSNTIGR2000000000                         | sp Q7Z460 CLAP1_HUMAN |
| 698 | LPDSDDEDEETAIQR20000000000000                      | sp Q96K21 ANCHR_HUMAN |
| 699 | VDIDTPDINIEGSEGK2000000000000                      | sp Q09666 AHNK_HUMAN  |
| 700 | EVAATEEDVTRLPSPTSPFSSLSQDQAATSK2020000000000000000 | sp Q8WWI1 LM07_HUMAN  |
| 701 | IACDEEFSDSEDEGEGRR2020000000000                    | sp Q92769 HDAC2_HUMAN |
| 702 | LDIDSPITAR20000000                                 | sp P14618 KPYM_HUMAN  |
| 703 | EMDESLANLSEDEYYSEER200000200000                    | sp O60341 KDM1A_HUMAN |
| 704 | VSSQAEDTSSSFDNLFIDR2000000000000000000             | sp Q9BZD3 GCOM2_HUMAN |
|     |                                                    | sp POCAP2 GRL1A_HUMAN |
| 705 | SSPGQTPEEGAQALAEFAALHGPALR2E+21                    | sp Q14166 TTL12_HUMAN |
| 706 | SRSSSVGSSSYPIPAVSR2220000000000000000              | sp Q15149 PLEC_HUMAN  |
| 707 | TQTPPVSPAPQPTTEER200020000000000                   | sp Q14247 SRC8_HUMAN  |
| 708 | DLGSTEDGDGTDDFLTDKEDEK2000020000000                | sp Q15527 SURF2_HUMAN |
| 709 | SYSAGNASQLEQLSR20000000000000                      | sp Q14678 KANK1_HUMAN |
| 710 | DSHSSEDEASSQTDLSQTISK2.02E+21                      | sp Q5JTV8 TOIP1_HUMAN |
| 711 | GSGTASDDEFENLR2000000000                           | sp Q7Z6Z7 HUWE1_HUMAN |
| 712 | EKEPSYPMPVQETQAPESPGENSEQALQTLSPR20000000000000000 | sp Q7Z434 MAVS_HUMAN  |
|     |                                                    | sp P05534 1A24_HUMAN  |
|     |                                                    | sp P30447 1A23_HUMAN  |
| 713 | KGGSYSQAASSDSAQGSVDVSLTACK20002002000000           | sp P01891 1A68_HUMAN  |
|     |                                                    | sp P01892 1A02_HUMAN  |
|     |                                                    | sp Q09160 1A80_HUMAN  |
|     |                                                    | sp P10316 1A69_HUMAN  |
| 714 | SNSAPLIHGLSDTSPVFQAEAPSAR2E+23                     | sp Q96E09 F122A_HUMAN |
| 715 | FYDLSDSNSLGEDSK20202002000000                      | sp Q9H501 ESF1_HUMAN  |
| 716 | LDSPPSPITEASEAAEAAEAGNLAVSSR2.0000002E+27          | sp Q9C0C2 TB182_HUMAN |
| 717 | TPDLSNQSSDQANEWETASESSDFNER202020000000            | sp Q9Y520 PRC2C_HUMAN |
| 718 | GESAPTLSTSPSPSSPSPTSPSPTLGR200000000000            | sp Q9H330 TM245_HUMAN |
| 719 | TIQNSSVSPTSSSSSSSSTGETQTQSSSR2000000000000000      | sp Q7Z417 NUFP2_HUMAN |
| 720 | EELMSSDLEETAGSTSIPK12000000000000000               | sp O00567 NOP56_HUMAN |
| 721 | STDSPGADAELPESAR20200000000000000                  | sp Q9Y4K1 AIM1_HUMAN  |
| 722 | LPQDHADSCVVSDDDEELSR2200000000                     | sp P78317 RNF4_HUMAN  |
| 723 | QLHLEGASLELSDDDTESK2000000000                      | sp P35580 MYH10_HUMAN |
| 724 | STSATDTHHVMAR20000000000000                        | sp O14874 BCKD_HUMAN  |
| 725 | AGMSSNQSISSPVLDVPR2000000000                       | sp Q9UQ35 SRRM2_HUMAN |
| 726 | EAEDSDSDNIKR2020000000                             | sp Q96ST2 IWS1_HUMAN  |
| 727 | ISSTPTTETIR2000000000                              | sp Q96QE3 ATAD5_HUMAN |
| 728 | VGDGDLAEEIPENEVSLR200000000000000                  | sp Q14684 RRP1B_HUMAN |



|     |                                                |                       |
|-----|------------------------------------------------|-----------------------|
| 729 | AASAAAAASAAAASASGSPGPEGGSAGGEK2. 000000002E+23 | sp Q13263 TIF1B_HUMAN |
| 730 | NSSEASSGDFLDLK200000000000                     | sp Q9UK76 HN1_HUMAN   |
| 731 | HQEVQDQDPVFGSDSSGYQSDHKK2022000200000          | sp Q3B726 RPA43_HUMAN |
| 732 | SGGSGHAVAEPASPEQELDQNK20000000000              | sp P46013 KI67_HUMAN  |
| 733 | SLSSPTVTLAPLEGAK2200000000000000               | sp Q96PU5 NED4L_HUMAN |
| 734 | GGVTGSPEASISGSK200000000000                    | sp Q09666 AHNK_HUMAN  |
| 735 | MSPMGTASGSNSPTSDSASVQR2E+21                    | sp 076080 ZFAN5_HUMAN |
| 736 | SGSSQELDVKPSASPQER2000000000000000             | sp Q9UQ35 SRRM2_HUMAN |
|     |                                                | sp P01891 1A68_HUMAN  |
|     |                                                | sp P10316 1A69_HUMAN  |
| 737 | KGGSYSQAASSDSAQGSVSLTACK2E+22                  | sp P01892 1A02_HUMAN  |
|     |                                                | sp P05534 1A24_HUMAN  |
|     |                                                | sp P30447 1A23_HUMAN  |
|     |                                                | sp Q09160 1A80_HUMAN  |
| 738 | LSSGFDDIDLPSAVK2200000000000000                | sp Q9Y446 PKP3_HUMAN  |
| 739 | LPSGGAASPTGSAVDIR2000000000000000              | sp Q09666 AHNK_HUMAN  |
| 740 | SRSEDLSPESDEEGYALSGR2. 000000002E+20           | sp Q15751 HERC1_HUMAN |
| 741 | VDSTTCLFPVEEK200000000000                      | sp Q06210 GFPT1_HUMAN |
| 742 | LLLAEDSEEEVDFLSER200000000000                  | sp Q14676 MDC1_HUMAN  |
| 743 | SSSLGSTPHEELER22002000000000                   | sp Q9NRA8 4ET_HUMAN   |
| 744 | HLDGEEDGSSDQSQASGTTGGR20020020000000           | sp Q9UNF1 MAGD2_HUMAN |
| 745 | DVDVSEDSPPPLPER2000000000                      | sp Q05209 PTN12_HUMAN |
| 746 | NDSLSSLDFFFFDLSR202200000000000000             | sp P25054 APC_HUMAN   |
| 747 | ALDISLSSGEEDEGDEEDSTAGTTK2. 02E+21             | sp Q8IY81 SPB1_HUMAN  |
| 748 | SLSSPTDNLELSLR200000000000                     | sp Q9Y2X7 GIT1_HUMAN  |
| 749 | VSSPLPSAMTDAANSQAAAK2. 00002E+21               | sp Q8WXI9 P66B_HUMAN  |
| 750 | ASTPDWVSEGPQPGLR2000000000000000               | sp Q8IVT2 MISP_HUMAN  |
| 751 | VVEAVNSDSDSEFGIPK202000000000                  | sp Q02880 TOP2B_HUMAN |
| 752 | DQPDGSSLSPAQSPSQSPPAASSLR200020000000000000    | sp Q6WCQ1 MPRIP_HUMAN |
| 753 | GSPSSPTPPAAAAPAEQAPR202000000000000000         | sp Q86VQ1 GLC11_HUMAN |
| 754 | TISAQDTLAYATALLNEK200000000000000000           | sp Q9UPU5 UBP24_HUMAN |
| 755 | TPLSSLSATSNNSTVACIDR200200000000               | sp P00533 EGFR_HUMAN  |
| 756 | GPGQVPTATSALSLELQVEVEPLGLPQASPSR20000          | sp Q6P2E9 EDC4_HUMAN  |
| 757 | GGEFDEFVNDTDDDLPI SK2000000000                 | sp Q6PD62 CTR9_HUMAN  |
| 758 | EVEDKESEGEEDDEDL SK2000000000000000            | sp 095218 ZRAB2_HUMAN |
| 759 | GFGDGYNGYGGGPGGNFGGSPGYGGGR200000000           | sp P22626 ROA2_HUMAN  |
| 760 | SQSDLDDQHDYDSVASDEDTDQEPLR2002000000000000     | sp Q9Y2X7 GIT1_HUMAN  |
| 761 | KYSEVDDSLPSGGEKPSK200000000000000000           | sp Q05D32 CTSL2_HUMAN |
| 762 | DDAESSSEPEEENVGNDTK2200000000000000            | sp Q13823 NOG2_HUMAN  |
| 763 | MESEGGADDSAEGLDLDLDDDDNEDR1. 000000002E+25     | sp P07910 HNRPC_HUMAN |
| 764 | SPGEYINIDFGEPGAR200000000000000000             | sp Q9Y4H2 IRS2_HUMAN  |
| 765 | QSFDDNDSELEDK20000000                          | sp 060841 IF2P_HUMAN  |
| 766 | NALFPEVFSPTPDENSQNSR2000000000000000           | sp Q8IVT2 MISP_HUMAN  |
| 767 | SSSISEEKGSDDEKPR20000000                       | sp Q9UKV3 ACINU_HUMAN |
| 768 | MEVGPFSTGQESPTAENAR200000000                   | sp Q9Y4W2 LAS1L_HUMAN |
| 769 | SKFDSDEEEDTENVEAASSGK2000000000000020000       | sp Q8TF01 PNISR_HUMAN |
| 770 | SGSSSPDSEITELK20200000000000                   | sp P17812 PYRG1_HUMAN |
|     |                                                | sp Q9BQE3 TBA1C_HUMAN |
|     |                                                | sp Q6PEY2 TBA3E_HUMAN |
| 771 | TIGGGDDSFNTFFSETGAGK20000000000000             | sp Q71U36 TBA1A_HUMAN |
|     |                                                | sp Q13748 TBA3C_HUMAN |
|     |                                                | sp P68363 TBA1B_HUMAN |
| 772 | EYVSNDAAQSDDEEK2000000                         | sp Q5JSH3 WDR44_HUMAN |
| 773 | ASHASSDWTTPRPR20022000000000                   | sp Q96EB6 SIR1_HUMAN  |

|     |                                                      |                       |
|-----|------------------------------------------------------|-----------------------|
| 774 | NTSSDNSDVEVMPAQSPR220020000000000000                 | sp Q9HCK8 CHD8_HUMAN  |
| 775 | ENPPVEDSSDEDDKR220000000                             | sp Q8TCJ2 STT3B_HUMAN |
| 776 | DELAELSEAESGDEKPK20002000000000                      | sp Q3L8U1 CHD9_HUMAN  |
| 777 | YESQLSTNEEKVDTDDR20000000000000                      | sp Q13433 S39A6_HUMAN |
| 778 | LASDSAESDSR20200000000                               | sp Q8WXG6 MADD_HUMAN  |
| 779 | TAVQYIESSDSEEIETSELPQK2202000000000000               | sp Q14527 HLTF_HUMAN  |
| 780 | SSSLIQLTSQNSSPNQR200000000000000000                  | sp O95639 CPSF4_HUMAN |
| 781 | KTSSVSSISQVSPER2000000000000000                      | sp P42356 PI4KA_HUMAN |
| 782 | LFDEEEDSSEKLFDDSDER2000000020000                     | sp O43719 HTSF1_HUMAN |
| 783 | ATGDGSSPELPSLER22000000000                           | sp Q9H2Y7 ZN106_HUMAN |
| 784 | FNSESESGSEASSPDYFGPPAK202000000000000000             | sp Q9BW71 HIRP3_HUMAN |
| 785 | LGASNSPGQPNSVK2000000000                             | sp P49756 RBM25_HUMAN |
| 786 | AGEPNSPDAEEANSPDVTAGCDPAGVHPPR2.00000002E+25         | sp Q08J23 NSUN2_HUMAN |
| 787 | RPTETNPVTSNSDEECNETVK2202000000000000                | sp P46100 ATRX_HUMAN  |
| 788 | AYACHAEHENDSDDDDEAEDDDETEELGSDEDDIDEDGQEYLEILAK2E+36 | sp O95373 IPO7_HUMAN  |
| 789 | EGSEFSFSDGEVAEK200202000000000                       | sp Q9BVS4 RIOK2_HUMAN |
| 790 | DAHVDSPTSTDTEAQLTVER200000000000000000               | sp Q8IVF2 AHNK2_HUMAN |
| 791 | QASTDAGTAGALTPQHVR200000000000000000                 | sp P46937 YAP1_HUMAN  |
| 792 | DGGSGNSTIIVSR20002000000                             | sp Q7Z6Z7 HUWE1_HUMAN |
| 793 | SRPTSEGSDIESTEPQK20000000000                         | sp Q4G0J3 LARP7_HUMAN |
| 794 | NSSEASSGDFLDLK2000000000000000                       | sp Q9UK76 HN1_HUMAN   |
| 795 | ESYTEEIVSEAESHVSGISR2000000200000                    | sp Q5QJE6 TDIF2_HUMAN |
| 796 | EAEQAASEAAGDTPGSSPSSLYEEPLGQPPR22000000000000000000  | sp Q86TC9 MYPN_HUMAN  |
| 797 | VQEKPDSPGGSTQIQR20000000000                          | sp Q13459 MYO9B_HUMAN |
| 798 | VAAAAGSGSPPGSPGHDR20000002000000                     | sp Q9BTU6 P4K2A_HUMAN |
| 799 | GPSPSPTPPAAAAPAEQAPR2.002E+19                        | sp Q86VQ1 GLC11_HUMAN |
| 800 | VIKDEALSDGDDL20000000                                | sp Q01831 XPC_HUMAN   |
| 801 | GTGGGQLQDLDCSSSDDEGAAQNSTKPSATK2.22E+19              | sp P08240 SRPR_HUMAN  |
| 802 | EADDDEEVDDNIPEMSPK2000                               | sp P26358 DNMT1_HUMAN |
| 803 | SGSPSDNSGAEEMEVSLAKPK2.0000200001E+19                | sp P31749 AKT1_HUMAN  |
|     |                                                      | sp P05534 1A24_HUMAN  |
|     |                                                      | sp P30447 1A23_HUMAN  |
| 804 | KGGSYSQAASSDSAQGSVSLTACKV200020020000000             | sp P01891 1A68_HUMAN  |
|     |                                                      | sp P01892 1A02_HUMAN  |
|     |                                                      | sp Q09160 1A80_HUMAN  |
|     |                                                      | sp P10316 1A69_HUMAN  |
| 805 | AGDRNSEDGVMTFSSVK2000000000000000                    | sp Q9NY61 AATF_HUMAN  |
| 806 | DNQESSDAELSSSEYIK2000002000000                       | sp Q96JM3 CHAP1_HUMAN |
| 807 | YGLQDSDEEEEEHPSK200000000000                         | sp P52948 NUP98_HUMAN |
| 808 | SPSFGEDYGPSR2020000000000000                         | sp P49761 CLK3_HUMAN  |
|     |                                                      | sp P49792 RBP2_HUMAN  |
|     |                                                      | sp Q7Z3J3 RGPD4_HUMAN |
| 809 | LNQSGTSVGTDEESDVTQEEER2000000000000000               | sp A6NKT7 RGPD3_HUMAN |
|     |                                                      | sp P0DJ0 RGPD1_HUMAN  |
|     |                                                      | sp P0JD1 RGPD2_HUMAN  |
| 810 | QQASASTDGVDKLSGK2000                                 | sp P46100 ATRX_HUMAN  |
| 811 | DPTSLLGVLQAEADSTSEGLEDAVHSR20000000000000            | sp Q27J81 INF2_HUMAN  |
| 812 | SYLEGSSDNQLKDESTPVDDR2.000002E+22                    | sp Q9UHI6 DDX20_HUMAN |
| 813 | KDSLDPADLASCGLSQSSASFFTPR2E+24                       | sp Q86SQ0 PHLB2_HUMAN |
| 814 | GPSLDIDTPDVNIEGPEGK20000000000000                    | sp Q09666 AHNK_HUMAN  |
| 815 | GSSDGRGSDSEDLPHR200002000000000000                   | sp Q9UPQ0 LIMC1_HUMAN |
| 816 | SKSDGEAKPEPSPSPR202000000000000000                   | sp P26358 DNMT1_HUMAN |

|     |                                                         |                       |
|-----|---------------------------------------------------------|-----------------------|
| 817 | DIEVLSEDTDYEEDEVTKK2002000000000000                     | sp Q4LE39 ARI4B_HUMAN |
| 818 | AASPPASASDLIEQQQK2000000000000000                       | sp Q5VSL9 STRP1_HUMAN |
| 819 | SQSESSDEVTELDLSHGK2022000000000000                      | sp Q86YS7 C2CD5_HUMAN |
| 820 | NESEDNKFSDSDDDFVQPR200000200200000000                   | sp O15164 TIF1A_HUMAN |
| 821 | MESEGGADDSAEGLDLDLDDDDNEDR2.0000002E+23                 | sp P07910 HNRPC_HUMAN |
| 822 | NPWSDDESSESLEETEPVVIPR2020200000000000                  | sp Q02880 TOP2B_HUMAN |
| 823 | SPTMEQAVQTASAHLPAPAAVGR2E+23                            | sp Q8ND56 LS14A_HUMAN |
| 824 | HDYDDSSSEEQAEDSYEASPGSETQR2.2E+21                       | sp P98175 RBM10_HUMAN |
| 825 | FAQSAPGSPLSSQPVLITVQR2000000000000000                   | sp Q01167 FOXK2_HUMAN |
| 826 | DDDLVEFSDLESEDDERPR20002000000000                       | sp Q9HCK8 CHD8_HUMAN  |
| 827 | FDSNEEDSASVFSFGLK200000000000000000                     | sp Q02880 TOP2B_HUMAN |
| 828 | KPVLPALTINPTIAEGPSPTSEGASEANLVDLQK200000000000000000    | sp P36507 MP2K2_HUMAN |
| 829 | EVDSSDDTTEEGPENSQGAQELSLAPHPEVSQSVAPK2.2E+34            | sp Q6P0Q8 MAST2_HUMAN |
| 830 | NSISDDDTSEDEL20002020000000                             | sp Q76FK4 NOL8_HUMAN  |
| 831 | DLLSDLQDISDSER200000200000                              | sp P21127 CD11B_HUMAN |
|     |                                                         | sp Q9UQ88 CD11A_HUMAN |
| 832 | EVSDSEAGGGPQGER2020000000000000                         | sp Q9BW71 HIRP3_HUMAN |
| 833 | KGSDDDGGDSPVQDIDTPEVDLYQLQVNTLR2.0000002E+29            | sp O75446 SAP30_HUMAN |
| 834 | KSPVGKSPSTGSTYGSSQK2.00002E+19                          | sp Q9Y2W1 TR150_HUMAN |
| 835 | EEPLSEEPCTSTAIASPEK200000000000000000                   | sp Q9Y2X3 NOP58_HUMAN |
| 836 | VSPAAAQLADTLFSK2000000000000000                         | sp O14686 KMT2D_HUMAN |
| 837 | GKEELAEAEIKDSPDSPEPPNK20000000                          | sp Q9NVM9 ASUN_HUMAN  |
| 838 | SPAGPAATPAQAQAASPR2E+19                                 | sp Q13428 TCOF_HUMAN  |
| 839 | ILSQSTDSLNR2000000000                                   | sp Q92974 ARHG2_HUMAN |
| 840 | SPDEVTLTSIVPTR2000000000000000                          | sp Q9UKS6 PACN3_HUMAN |
| 841 | KQSFDDNDSELEDK20000020000000                            | sp O60841 IF2P_HUMAN  |
| 842 | SPVGS GAPQAAAPAPAAHVAGNPGGDAAPAATGTAASLATAAGSEDAEK2E+51 | sp P16989 YBOX3_HUMAN |
| 843 | GAGDGSDEEVDGK2000000000                                 | sp P35579 MYH9_HUMAN  |
| 844 | SDVQEESEGSDDDNKDSAAFEDNEVQDEFLEK2.0000000002E+27        | sp Q9UIG0 BAZ1B_HUMAN |
| 845 | LPSGSGAASPTGSAVDIR2000000000                            | sp Q09666 AHNK_HUMAN  |
| 846 | KEDTAFSDWSEDEVPDR200200000000                           | sp Q5T200 ZC3HD_HUMAN |
| 847 | GISSSNEGVEEPSK20000000000000                            | sp Q9NXV6 CARF_HUMAN  |
| 848 | KPPAPSPVQSQSPSTNWSPAVPVK2.000200000002E+19              | sp Q8IYB3 SRRM1_HUMAN |
| 849 | EDQEAELLSEPEEESER2000000000                             | sp Q63HN8 RN213_HUMAN |
| 850 | ELVGDGTSGEQGDHEPSGSETEEDTSSSPHR2.0000000202E+23         | sp PODJ93 SIM13_HUMAN |
| 851 | NSPSNLSSSDTGSVGGTYR200000000000000000                   | sp O43166 SIL1_HUMAN  |
| 852 | TPSYSISSTLNPAPEFILGCTASK2E+23                           | sp Q14694 UBP10_HUMAN |
| 853 | SASPDLDLSSNWEADLGNEER2.00000002E+21                     | sp O00193 SMAP_HUMAN  |
| 854 | RSSTVAPAQPDGAESEWTDVETR2E+22                            | sp Q02241 KIF23_HUMAN |
| 855 | GNSRPGTPSAEGGSTSSTLR200020000000000000                  | sp P35269 T2FA_HUMAN  |
| 856 | ANSGVDLDSSGEFASIEK200000002000000000                    | sp Q92766 RREB1_HUMAN |
| 857 | SSVAAPEKSSNSVDEETAESDTSPVLEK2.22002E+22                 | sp Q99590 SCAFB_HUMAN |
| 858 | SPSAPAATSSASSSTSSYK2E+19                                | sp Q15345 LRC41_HUMAN |
| 859 | EEGPPPPSPDGASSDAEPEPPSGR200002000000000000              | sp Q9NTJ3 SMC4_HUMAN  |
| 860 | KQSLGELIGTLNAAK2000000000000000                         | sp P60174 TPIS_HUMAN  |
| 861 | ELKSDASSDQGPASPEK2002200000000000                       | sp Q6BDS2 URFB1_HUMAN |
| 862 | AKPAMPQDSVSPR2000                                       | sp P53396 ACLY_HUMAN  |
|     |                                                         | sp P08238 HS90B_HUMAN |
| 863 | IEDVGSDEEDDSGKDK200000200000                            | sp Q58FF8 H90B2_HUMAN |
| 864 | SGSSSPDSEITELK200000000000                              | sp P17812 PYRG1_HUMAN |
| 865 | MEQQYESSSDGTEKLPER200000000000                          | sp P46100 ATRX_HUMAN  |
| 866 | NGFPHPEDCNPSEAASEESNSEIEQEIPEVQK2000000000000000        | sp Q9NR30 DDX21_HUMAN |

|     |                                                  |                       |
|-----|--------------------------------------------------|-----------------------|
| 867 | SSLSGDEEDELFK202000000000                        | sp Q5T1M5 FKB15_HUMAN |
| 868 | LSEDEEEDEAEDDQSEASGKK2. 2E+21                    | sp Q8NEJ9 NGDN_HUMAN  |
| 869 | EVADIFNAPSDDEEFVGF20000000000                    | sp Q96GN5 CDA7L_HUMAN |
| 870 | SGSMDPSGAHPSVR200000000000                       | sp Q07666 KHDR1_HUMAN |
| 871 | GLQLTPGIGGMQHHFFDDED2000000000000000             | sp P12270 TPR_HUMAN   |
| 872 | SPEPEVLSTQEDLFDQSNK2E+19                         | sp Q12888 TP53B_HUMAN |
| 873 | KLSVPTSDEEDEVPAKPR2200000000000000               | sp Q8NE71 ABCF1_HUMAN |
| 874 | SSSEDAESLAPR200000000000                         | sp Q4G0J3 LARP7_HUMAN |
| 875 | YMAENPTAGVVQEEEDNLEYSDGNPIAPTK20000000000        | sp Q86XP3 DDX42_HUMAN |
| 876 | HSSTGDSADAGPPAAGSAR200000000000000000            | sp Q6ZU35 K1211_HUMAN |
| 877 | ADDFPVRDDPSDVTDEDEGPAEPPPPK200200000000000000    | sp Q3YEC7 RABL6_HUMAN |
| 878 | EKEISDDEAEEK2000000000                           | sp P08238 HS90B_HUMAN |
| 879 | ASGQAFELILSPR2000                                | sp P16949 STMN1_HUMAN |
| 880 | KTSDANETEDHLESLICK200000000000000000             | sp Q09161 NCBP1_HUMAN |
| 881 | SYSSPDITQAIQEEK20000000000000                    | sp P40818 UBP8_HUMAN  |
| 882 | VQGEAVSNIQENTQTPTVQEESEEEVDETGVK2E+21            | sp E9PAV3 NACAM_HUMAN |
| 883 | EYVSNDAAQSDDEEKLQSQPTD200000000000000000         | sp Q13765 NACA_HUMAN  |
| 884 | SEDESETEDEEEK2000000000                          | sp Q5JSH3 WDR44_HUMAN |
| 885 | EEGSSDEISSGVGSESEGLNSPVK2. 2000200002E+22        | sp P25205 MCM3_HUMAN  |
|     |                                                  | sp P52701 MSH6_HUMAN  |
|     |                                                  | sp P01891 1A68_HUMAN  |
|     |                                                  | sp P01892 1A02_HUMAN  |
| 886 | GGSYSQAASSDSAQGSVSLTACK2E+22                     | sp P05534 1A24_HUMAN  |
|     |                                                  | sp Q09160 1A80_HUMAN  |
|     |                                                  | sp P10316 1A69_HUMAN  |
|     |                                                  | sp P30447 1A23_HUMAN  |
| 887 | TSSFAEPGGGGGGGGGGPGGSASGPGGTGGGK2E+30            | sp P49840 GSK3A_HUMAN |
| 888 | TESPATAAETASEELDNR20000000000000                 | sp Q9NTJ3 SMC4_HUMAN  |
| 889 | SYDNLTTACDNTVPLASR200000000000000000             | sp Q13615 MTMR3_HUMAN |
| 890 | DWQDDQSDNQSDYSVASEEGDEDFDER203200200000000000    | sp Q14839 CHD4_HUMAN  |
| 891 | EMEHNTVCAAGTSPVGEIGEEK200000000000               | sp P18583 SON_HUMAN   |
| 892 | TAGSSVTSLDGTR2000000                             | sp Q92597 NDRG1_HUMAN |
| 893 | HIISATSLSTSPTELGSR200000000000                   | sp Q5JSZ5 PRC2B_HUMAN |
| 894 | SPGIISQASAPR20000000000000                       | sp Q08495 DEMA_HUMAN  |
| 895 | TSPADHGGVSGSESGSAVDSVAGEHSVSGR200200000000000000 | sp Q5T4S7 UBR4_HUMAN  |
| 896 | DQTASAPATPLVNK20000000000                        | sp Q53SF7 COBL1_HUMAN |
| 897 | NHSDSSTSESEVSSVPLK20000                          | sp Q9NY27 PP4R2_HUMAN |
| 898 | SRSPLDKDYPPSASVVGASVGGHR2. 000002E+23            | sp Q96T37 RBM15_HUMAN |
| 899 | RPSQEQSASASSGQPQAPLNR2E+19                       | sp Q5T1M5 FKB15_HUMAN |
| 900 | KVEEQEADEEDVSEEAESK200000000                     | sp Q9H3N1 TMX1_HUMAN  |
| 901 | SSSVGSSSSYPISPAISR200000000000000000             | sp Q15149 PLEC_HUMAN  |
| 902 | GSSGVDETFLFALPAASEPVIR2. 02E+20                  | sp Q9NQC3 RTN4_HUMAN  |
| 903 | AGLESGAEPGDGSDTTK200000                          | sp Q060832 DKC1_HUMAN |
| 904 | KPPAPSPVQSQSPSTNWSPAVPK2. 0002E+19               | sp Q8IYB3 SRRM1_HUMAN |
| 905 | DPSVEVTQDLIDESEER200000                          | sp Q5MIZ7 P4R3B_HUMAN |
| 906 | SESELIDELSEDFDR2000000000000000                  | sp P20810 ICAL_HUMAN  |
| 907 | GPASDSETEDASR20200000000                         | sp Q96ST2 IWS1_HUMAN  |
| 908 | KEESEESDDMGFLFD2000000000000000                  | sp P05387 RLA2_HUMAN  |
|     |                                                  | sp P05386 RLA1_HUMAN  |
| 909 | SNSLPHSAVSNAGSK20000000000000                    | sp Q8TBZ3 WDR20_HUMAN |
| 910 | SSTVTEAPIAVVTSR20000000000000                    | sp Q8TD19 NEK9_HUMAN  |
| 911 | SVGGSGGGSFGDNLVTR2000000000                      | sp P02545 LMNA_HUMAN  |
| 912 | TKDQPDGSSLSPAQSPSQSPPAASSLR200020000000000000    | sp Q6WCQ1 MPRIP_HUMAN |
| 913 | KASGSENEGDPGR20000000000000                      | sp Q02880 TOP2B_HUMAN |

|     |                                           |                       |
|-----|-------------------------------------------|-----------------------|
| 914 | VSDPISTSESSEEEEEAEATAK222022000000000000  | sp Q13428 TCOF_HUMAN  |
| 915 | INSSGESGDESDEFLQSR2002000200000000        | sp O60841 IF2P_HUMAN  |
| 916 | SRSPTPPSSAGLGSNSAPPIDSR2. 02002E+22       | sp Q8IWX8 CHERP_HUMAN |
| 917 | SVSSPTSSNTPTPTK22000000000000             | sp Q5M775 CYTSB_HUMAN |
|     |                                           | sp P01891 1A68_HUMAN  |
|     |                                           | sp P10316 1A69_HUMAN  |
| 918 | GGSYSQAASSDSAQGSVDVSLTACK20000000000000   | sp P05534 1A24_HUMAN  |
|     |                                           | sp P30447 1A23_HUMAN  |
|     |                                           | sp Q09160 1A80_HUMAN  |
|     |                                           | sp P01892 1A02_HUMAN  |
| 919 | YTPTSPSYSPSSPEYTPSPK3. 00000002E+21       | sp P24928 RPB1_HUMAN  |
| 920 | EMDESLANLSEDEYYSEEER1. 00000002000002E+19 | sp O60341 KDM1A_HUMAN |
| 921 | SLSTSGESLYHVLGLDK2000000000000000         | sp Q9H3Z4 DNJC5_HUMAN |
| 922 | DAPTSPASVASSSSTPSSK2000000000000000       | sp Q04726 TLE3_HUMAN  |
| 923 | VEQALSEVASSLQSSAPK2200000000              | sp Q86TV6 TTC7B_HUMAN |
| 924 | IACKSPPPEVDTPSTK2000000000000000          | sp P46013 KI67_HUMAN  |
| 925 | APVSSSTSVIQSNTPTPPSQPLNETAEESR2. 02E+19   | sp Q9HC35 EMAL4_HUMAN |
| 926 | TCEERPAEDGSDEEDPDSMEAPTR20000000000000    | sp Q9H6Y2 WDR55_HUMAN |
| 927 | EFDEDSDEKEEEEDTYEK20000000000000          | sp O43719 HTSF1_HUMAN |
| 928 | TSSTLDSEGTFNYSYR20000000000000            | sp Q92609 TBCD5_HUMAN |
| 929 | KDSLTLQAQEQGNLLN20000000000000            | sp Q5JTD0 TJAP1_HUMAN |
| 930 | EGMNPSYDEYADSDQHDAYLER1. 000000002E+22    | sp Q08945 SSRP1_HUMAN |
| 931 | STGSATSLASQGER200200000000                | sp Q5SW79 CE170_HUMAN |
| 932 | TRSPDVISSASTALSQDIPEIASEALSR2E+26         | sp Q6P2E9 EDC4_HUMAN  |
|     |                                           | sp Q09160 1A80_HUMAN  |
|     |                                           | sp P05534 1A24_HUMAN  |
| 933 | KGGSYSQAASSDSAQGSVDVSLTACK2002000000      | sp P30447 1A23_HUMAN  |
|     |                                           | sp P01891 1A68_HUMAN  |
|     |                                           | sp P01892 1A02_HUMAN  |
|     |                                           | sp P10316 1A69_HUMAN  |
| 934 | ENSPAVSPTTNSTAPFGLKPR2. 0002E+19          | sp Q9Y2L9 LRCH1_HUMAN |
| 935 | GYTSDDDTWEPEIHLEDCK2000000000000000       | sp Q99549 MPP8_HUMAN  |
| 936 | MLAESDESGDEESVSQTDKTELQNTLR2. 002E+23     | sp P22059 OSBP1_HUMAN |
| 937 | APSSSSLNSATSSQSK2000000000000000          | sp Q5F1R6 DJC21_HUMAN |
| 938 | METVSNASSSSNPSSPGR20000                   | sp Q9NTI5 PDS5B_HUMAN |
| 939 | SQDVAVSPQQQCSK2000000000                  | sp Q96F86 EDC3_HUMAN  |
| 940 | EENPESDGEPVVEDGTSVK20000000000000         | sp Q13439 GOGA4_HUMAN |
| 941 | SAYQEYDSDSDVPEELKR200000000000            | sp Q96JG6 CC132_HUMAN |
| 942 | ESESEAEAGAAELR2000000000000000            | sp Q8NAF0 ZN579_HUMAN |
| 943 | SGSSQELDVKPSASPQER2200000000000000        | sp Q9UQ35 SRRM2_HUMAN |
| 944 | NKSNEQSMGNWQIK20000000000000              | sp P02545 LMNA_HUMAN  |
| 945 | SGSIVELIAGGGSSCSPVLSR2. 000000000002E+19  | sp P42858 HD_HUMAN    |
| 946 | SSSLGSTEPHEELER2200020000000000           | sp Q9NRA8 4ET_HUMAN   |
| 947 | AEGEWEDQEALDYFSDKESGK20002000             | sp Q9NYF8 BCLF1_HUMAN |
| 948 | KPGDASSLPDAGLSPGSQVDSK2000000000          | sp Q13459 MYO9B_HUMAN |
| 949 | SPPEGDTTLFLSR2000000000000000             | sp Q9BTC0 DIDO1_HUMAN |
| 950 | DSHSSEDEASSQTDLSQTISKK2. 2E+20            | sp Q5JTV8 TOIP1_HUMAN |
| 951 | SPTMEQAVQTASAHLPAVAVGR2. 001E+23          | sp Q8ND56 LS14A_HUMAN |
| 952 | TASESISNLSEAGSIK2000                      | sp P30622 CLIP1_HUMAN |
| 953 | HQASDSENEELPKPR20200000000000             | sp Q96ST2 IWS1_HUMAN  |
| 954 | LPSDITDSDASEDPGGAER202002000000000000     | sp Q9UJK0 TSR3_HUMAN  |
| 955 | SGVSSDNEDDDDEEDGNYLHPSLFASK2E+23          | sp Q12872 SFSWA_HUMAN |
| 956 | DQQPSGSEGEDDDAEALK2020000000000000        | sp Q9NXG2 THUM1_HUMAN |
| 957 | EPTPSIASDISLPIATQELR20020000000000        | sp A0FGR8 ESYT2_HUMAN |

|      |                                                      |                       |
|------|------------------------------------------------------|-----------------------|
| 958  | AASPESASSTPESLQAR2022000000000                       | sp Q96BT3 CENPT_HUMAN |
| 959  | ASGEMASAQYITAALR2000000000000000                     | sp P54578 UBP14_HUMAN |
| 960  | DGESDGFADDEESGEEGEDQEEGREPGAGR2.000000002E+28        | sp P48681 NEST_HUMAN  |
| 961  | DWQDDQSDNQSDYSVASEEGDEDFDER2.0002030002E+21          | sp Q14839 CHD4_HUMAN  |
| 962  | KLSSSSEPYEEDFNDDQSIK2.202E+19                        | sp Q9H4L7 SMRCD_HUMAN |
| 963  | MHDGELEEQEEDDEKSDSEGGDLK20200000000                  | sp Q9NU22 MDN1_HUMAN  |
| 964  | TSDSDQAYLVQR20000000000                              | sp Q96CV9 OPTN_HUMAN  |
| 965  | DLESCSDDDNQGSK202000000000                           | sp Q5T3I0 GPTC4_HUMAN |
| 966  | LASPSGSTSSGLEVVAPGTSAPGGGPGTLDDSATICR2E+29           | sp Q13263 TIF1B_HUMAN |
| 967  | MHNLHGTKPPPSEGSDEEEEEDEEDEEER1.00000000002002E+30    | sp Q9BQ67 GRWD1_HUMAN |
| 968  | VVSDADSDSDAVSDK2000020000000000                      | sp Q96ST2 IWS1_HUMAN  |
| 969  | AQAVSEEEEEEGK20000000000                             | sp Q9GZR7 DDX24_HUMAN |
| 970  | AGMSSNQSISSPVLDAVPR100000022000000000                | sp Q9UQ35 SRRM2_HUMAN |
| 971  | SSSSPELQTLQDILGDPGDK2200000000000000000              | sp P49815 TSC2_HUMAN  |
| 972  | SEPVKEESSELEQPFADTSSVGPDR2000000000000000000         | sp Q15424 SAFB1_HUMAN |
| 973  | GPAGEAGASPPVR200000                                  | sp Q14151 SAFB2_HUMAN |
| 974  | VFDDESDEKEDEEYADEK2000000000000000                   | sp Q13425 SNTB2_HUMAN |
| 975  | DVEDMELSDVEDDGSK2000000000                           | sp 043719 HTSF1_HUMAN |
| 976  | YFGFDLSESEDEDDDCQVER2020000000000000                 | sp Q5VT52 RPRD2_HUMAN |
| 977  | TPASTPVSGTPQASPMIER20002000000                       | sp Q7Z5K2 WAPL_HUMAN  |
| 978  | SQEADVQDWEFR20000000000000                           | sp Q9UHR4 BI2L1_HUMAN |
| 979  | TAAGEYDSVSESEDEEMLEIR30002020000000000               | sp Q9COC2 TB182_HUMAN |
| 980  | GTEASSGTEAATGLEGEEK2000000000000000                  | sp Q9BZE4 NOG1_HUMAN  |
| 981  | VEMYSGSDDDDFNK202000000000                           | sp Q8IY81 SPB1_HUMAN  |
| 982  | SISNEGLTLNNSHVSK2000000000000000                     | sp 060841 IF2P_HUMAN  |
| 983  | ESYTEEIVSEAEHVSGISR20002000000000                    | sp Q08AD1 CAMP2_HUMAN |
| 984  | LNDLSDSNLDEESEDEFK2020000002000000                   | sp Q5QJE6 TDIF2_HUMAN |
| 985  | GNAEGSSDEEGKLVIDEPAK2000000000000000                 | sp Q96T23 RSF1_HUMAN  |
| 986  | TSTTGVAATQSPTPR200000                                | sp P51858 HDGF_HUMAN  |
| 987  | VSPLEGSEGDGDTD200000200                              | sp Q8WWI1 LM07_HUMAN  |
| 988  | TQEDEEISTSPGVSEFVSDAFDACNLNQEDLR2E+23                | sp Q9Y606 TRUA_HUMAN  |
| 989  | ESEVCPVPTNSPPLPPPLPK2020000000000000                 | sp Q96A49 SYAP1_HUMAN |
| 990  | VDSTTCLFPVEEK200000000000                            | sp Q9ULJ3 ZBT21_HUMAN |
| 991  | SPVIGSEVFLPNSNHVASGAGEAEER2E+26                      | sp Q06210 GFPT1_HUMAN |
| 992  | TGSCSELDACPSK200000000000                            | sp P29590 PML_HUMAN   |
| 993  | VPAEDETQSIDSEDSFVPGR20020000000000                   | sp Q9H1H9 KI13A_HUMAN |
| 994  | SVSGTDVQECCR20000000000000                           | sp Q8WZ73 RFFL_HUMAN  |
| 995  | SVSEINSDELKSGK2000000000                             | sp P49321 NASP_HUMAN  |
| 996  | IDEPSTPYHSMGDEDEDACSDTEATEAMPDILAR1.10000000002E+25  | sp P82094 TMF1_HUMAN  |
| 997  | EVAATEEDVTRLPSPTSPFSSLSQDQAATSK22000000000000000     | sp P41236 IPP2_HUMAN  |
| 998  | LPSTSDDCPAIGTPLR200000000020000                      | sp Q8WWI1 LM07_HUMAN  |
| 999  | SLYGDVDSPLPTGEAGPPSTR2000000000000000                | sp Q15648 MED1_HUMAN  |
| 1000 | AASADSTTEGTPADGFTVLSTK2.002E+20                      | sp Q9Y4B5 MTCL1_HUMAN |
| 1001 | VKLDDSDDEESK2000000000                               | sp 075367 H2AY_HUMAN  |
| 1002 | SVEDDKEGHLVCR20000000000000                          | sp Q12872 SFSWA_HUMAN |
| 1003 | DLLSDLQDISDSER200000                                 | sp P49761 CLK3_HUMAN  |
| 1004 | GDIVAVNALLDHPEELQPSSESDDEGPELLQVTR202020000000000000 | sp P21127 CD11B_HUMAN |
| 1005 | NEEDSEGSSDEDEDEDGVSAATFLK2.0022E+21                  | sp Q9UQ88 CD11A_HUMAN |
| 1006 | DSDSEEDLVSYGTGLEPLEEGERPK2.02E+24                    | sp Q9BPX7 CG025_HUMAN |
|      |                                                      | sp B5ME19 EIFCL_HUMAN |
|      |                                                      | sp Q99613 EIF3C_HUMAN |
|      |                                                      | sp Q9BRR8 GPTC1_HUMAN |

|      |                                                |                       |
|------|------------------------------------------------|-----------------------|
| 1007 | VGNESPVQELK20000000                            | sp Q5JSH3 WDR44_HUMAN |
| 1008 | AEENTDQASPQEDYAGFER200000000000                | sp Q9NU22 MDN1_HUMAN  |
| 1009 | ATSSSSGSLSATGR200000000000                     | sp Q03252 LMNB2_HUMAN |
| 1010 | TVSSPPTSPRPGSAATVSASTSNIIPPR2002000000000000   | sp 076094 SRP72_HUMAN |
| 1011 | LPSTSGSEGVFPR200000000000                      | sp P29317 EPHA2_HUMAN |
| 1012 | SPGSTPTTPTSSQAPQK2000000000000000              | sp P35658 NU214_HUMAN |
| 1013 | DNQESSDAELSSSEYIK20000200000000                | sp Q96JM3 CHAP1_HUMAN |
| 1014 | KSSEGGVGVGPGGGDEPPTSPR2E+20                    | sp Q9Y4H2 IRS2_HUMAN  |
| 1015 | GLRDSHSSEEDEASSQTDLSTISK2. 2E+19               | sp Q5JTV8 TOIP1_HUMAN |
| 1016 | VAASPKSPTAALNESLVECPK2020000000000000          | sp Q53EZ4 CEP55_HUMAN |
| 1017 | SQSDLDDQHDYDSVASDEDTDQEPLR200000000000         | sp Q9Y2X7 GIT1_HUMAN  |
| 1018 | SGDETPGSEVPGDK2000200000000000                 | sp Q1KMD3 HNRL2_HUMAN |
| 1019 | FQEQECPPSPEPTR2000000                          | sp P62070 RRAS2_HUMAN |
| 1020 | VMTIPYQPMPASSPVICAGGQDR200000000000            | sp Q15365 PCBP1_HUMAN |
| 1021 | DLLSDLQDISDSER200000200000                     | sp Q9UQ88 CD11A_HUMAN |
| 1022 | LQQGAGLESPPQQPEPGAASPQR2000000000020000        | sp P21127 CD11B_HUMAN |
| 1023 | SSSEDAESLAPR200000000000                       | sp Q9H6F5 CCD86_HUMAN |
| 1024 | DKAPVPPQSPAAAPGGTDEKPSGK2000000000000000       | sp Q4G0J3 LARP7_HUMAN |
| 1025 | LKLEDDSEESDAEFDEGFK20020000000000              | sp Q13200 PSMD2_HUMAN |
| 1026 | DDAEESSEPEEENVGNDTK2020000000000000            | sp Q03468 ERCC6_HUMAN |
| 1027 | STAQQELDGKPASPTPVIVASHTANK2000000000000000     | sp Q13823 NOG2_HUMAN  |
| 1028 | HSVTAATPPPSPTSGESGDLLSNLLQSPSSAK2. 0002E+26    | sp P35606 COPB2_HUMAN |
| 1029 | FTMDLSDSEDFDFDEK200002000000                   | sp Q96QU8 XPO6_HUMAN  |
| 1030 | QPPGTQQSHSSPGEITSSPQGLDNPALLR2E+19             | sp P11388 TOP2A_HUMAN |
| 1031 | LNHVAAGLVSPSLK200000                           | sp Q5TDH0 DDI2_HUMAN  |
| 1032 | GGSYSQAASSDSAQGSVSLTACK2000000000000000        | sp Q05519 SRS11_HUMAN |
| 1033 | EEGPPPPSPDGASSDAEPEPPSGR20000000000000         | sp P01891 1A68_HUMAN  |
| 1034 | VQGEAVSNIQENTQTPTVQEESEEEEEVDETGVEVK2E+19      | sp P01892 1A02_HUMAN  |
| 1035 | GLNSQSSDDHLNKR200000000000                     | sp P05534 1A24_HUMAN  |
| 1036 | GLVAAYSGESDSEEEQER30002020000000               | sp Q09160 1A80_HUMAN  |
| 1037 | GGSYSQAASSDSAQGSVSLTACK20002000000000          | sp P10316 1A69_HUMAN  |
| 1038 | SAPASPTHPLMSPR2000200000000000                 | sp P30447 1A23_HUMAN  |
| 1039 | FFTTGSDSESESSLSGEELVTKPVGGNYGK2. 02E+25        | sp Q9NTJ3 SMC4_HUMAN  |
| 1040 | TGSYGALAEITASK200000000000                     | sp E9PAV3 NACAM_HUMAN |
| 1041 | KDSNELSDSAGEEDSADLKR2020000000000000           | sp Q13765 NACA_HUMAN  |
| 1042 | KVELSESEEDKGGK200000000000                     | sp A8CG34 P121C_HUMAN |
| 1043 | ASASGGAQVGGPISSGSSASSVTVTR200000000000         | sp Q96HA1 P121A_HUMAN |
| 1044 | LASPSGSTSSGLEVVPEGTSAPGGGPGTLDDSATICR2E+36     | sp P98175 RBM10_HUMAN |
| 1045 | GARPPAAGPGGDEDEDEEDTAPESALDTSLDK20002000020000 | sp P05534 1A24_HUMAN  |
| 1046 | IYHLPDAESDEDEDFKEQTR200000000000               | sp P30447 1A23_HUMAN  |
|      |                                                | sp P01891 1A68_HUMAN  |
|      |                                                | sp P01892 1A02_HUMAN  |
|      |                                                | sp Q09160 1A80_HUMAN  |
|      |                                                | sp P10316 1A69_HUMAN  |
|      |                                                | sp P85037 FOXK1_HUMAN |
|      |                                                | sp B5ME19 EIFCL_HUMAN |
|      |                                                | sp Q99613 EIF3C_HUMAN |
|      |                                                | sp 014974 MYPT1_HUMAN |
|      |                                                | sp Q9Y6X9 MORC2_HUMAN |
|      |                                                | sp Q8IYB3 SRRM1_HUMAN |
|      |                                                | sp P02545 LMNA_HUMAN  |
|      |                                                | sp Q13263 TIF1B_HUMAN |
|      |                                                | sp Q27J81 INF2_HUMAN  |
|      |                                                | sp Q15019 SEPT2_HUMAN |

|      |                                                         |    |        |             |
|------|---------------------------------------------------------|----|--------|-------------|
| 1047 | IHDLEDDLEMSDASDASGEEGGR220020020000000                  | sp | P35269 | T2FA_HUMAN  |
| 1048 | DHAPSIPTSPFGDSLESSTELR200200000000000000                | sp | Q9Y4B5 | MTCL1_HUMAN |
| 1049 | AASLNLYLNQPSAAPLQVSR200000000000000000                  | sp | Q9NSK0 | KLC4_HUMAN  |
| 1050 | TSSTSSSVNSQTLNR2000000000000000                         | sp | Q9NYJ8 | TAB2_HUMAN  |
|      |                                                         | sp | 014950 | ML12B_HUMAN |
| 1051 | ATSNVFMFDQSQIQEFK200000000000000000                     | sp | P19105 | ML12A_HUMAN |
|      |                                                         | sp | P24844 | MYL9_HUMAN  |
| 1052 | QVVSVVQDEEVGLPFEASPESPPPASPDPGVTEIR200000002000000000   | sp | Q96TA1 | NIBL1_HUMAN |
| 1053 | KGGEFDEFVNDTDDDLPIISK20000000000                        | sp | Q6PD62 | CTR9_HUMAN  |
| 1054 | EPGSGGPQNLSPGGR2000000                                  | sp | Q9HOW8 | SMG9_HUMAN  |
| 1055 | EKGSTLDLSDLEAEK20000000000000                           | sp | 000767 | ACOD_HUMAN  |
| 1056 | APSDTGSLSPWDQDR20200000000                              | sp | 015320 | CTGE5_HUMAN |
| 1057 | IADPEHDHTGFLTEYVATR20300000                             | sp | P27361 | MK03_HUMAN  |
| 1058 | MQSLQLDCVAVPSSR200000000000200                          | sp | Q13546 | RIPK1_HUMAN |
| 1059 | VAAAAGSGSPPGSPGHDR20002000000                           | sp | Q9BTU6 | P4K2A_HUMAN |
| 1060 | SPSVSPSKQPVSTSSK202000000000000000                      | sp | Q96JG6 | CC132_HUMAN |
| 1061 | KKPSTDEQTSSAEEDVPTCGYLNLSNSR2. 22E+21                   | sp | Q8N556 | AFAP1_HUMAN |
| 1062 | SRLTPVSPESSSTEEK200200000000000                         | sp | Q13501 | SQSTM_HUMAN |
| 1063 | GSSGSPAHAESYSSGGGGQK2. 02E+19                           | sp | P15408 | FOSL2_HUMAN |
| 1064 | YQPLASTASDNDFVTPEPR202000000000000                      | sp | Q15021 | CND1_HUMAN  |
| 1065 | SPPPTHSTQLGAPSR200000000000000000                       | sp | Q14814 | MEF2D_HUMAN |
| 1066 | LPISDSPDTQEIHVIEQEK200000000000000000                   | sp | Q8WYP5 | ELYS_HUMAN  |
| 1067 | LASPSGTSSGLEVVAPGTSAPGGGPGTLDDSATICR2. 22E+31           | sp | Q13263 | TIF1B_HUMAN |
| 1068 | SLSPGGAALGYR200000000000                                | sp | Q96T37 | RBM15_HUMAN |
| 1069 | GDDDEESDEEAVKK2000000000                                | sp | 043395 | PRPF3_HUMAN |
| 1070 | SSTPLPTISSAENTR220000000000000000                       | sp | P42166 | LAP2A_HUMAN |
|      |                                                         | sp | P42167 | LAP2B_HUMAN |
| 1071 | ATNESEDEIPQLVPIGK2000000000000000                       | sp | 076021 | RL1D1_HUMAN |
| 1072 | AVPIA VADEGESESEDDLKPR202000000000                      | sp | Q9Y2K6 | UBP20_HUMAN |
| 1073 | VLDTSSLTQSAPASPTNK2000200000                            | sp | Q8N122 | RPTOR_HUMAN |
| 1074 | TPSDDEEDNLFAPPK2000000000000000                         | sp | Q9Y4E1 | FA21C_HUMAN |
|      |                                                         | sp | Q641Q2 | FA21A_HUMAN |
| 1075 | ANSFVGTAQYVSPELLTEK200000000000000000                   | sp | 015530 | PDPK1_HUMAN |
|      |                                                         | sp | Q6A1A2 | PDPK2_HUMAN |
| 1076 | ASVSQTSPQSASSPR20000000000                              | sp | Q8TDY2 | RBCC1_HUMAN |
| 1077 | SLESCLDLR200000000000                                   | sp | Q6ZRV2 | FA83H_HUMAN |
| 1078 | ALAEAESEELPSDVLNDPYFAEEVK2. 000002E+21                  | sp | Q9H501 | ESF1_HUMAN  |
| 1079 | GYTSDSEVYTDHGRPGK2000000000000000                       | sp | Q92538 | GBF1_HUMAN  |
| 1080 | EEGPPPPSPDGASSDAEPEPPSGR200000000000                    | sp | Q9NTJ3 | SMC4_HUMAN  |
| 1081 | RGSQKSTDSPGADAELPESAAAR2. 0002E+20                      | sp | Q9Y4K1 | AIM1_HUMAN  |
| 1082 | SPLTILQDDNSPGTLTLR2000000200000000                      | sp | Q99618 | CDCA3_HUMAN |
| 1083 | QSFDDNDSELEDKDSK200000000000                            | sp | 060841 | IF2P_HUMAN  |
| 1084 | KLSVPTSDEEDEVPAKPR200020000000000000                    | sp | Q8NE71 | ABCF1_HUMAN |
| 1085 | SSGTASSVAFTPLQGLEIVNPQAAEK2. 0002E+20                   | sp | Q8WWY3 | PRP31_HUMAN |
| 1086 | RNPWSDDESKSESLEETEPVVIPR2. 00020202E+21                 | sp | Q02880 | TOP2B_HUMAN |
| 1087 | GTLDEEEDSADTDDIDHR20000000                              | sp | Q9HCN4 | GPN1_HUMAN  |
| 1088 | SPVGSQAPQAAAPAPAAHVAGNPGGDAAPAATGTAASLATAAGSEDAEKK2E+52 | sp | P16989 | YBOX3_HUMAN |
| 1089 | TPLSSLSATSNNSTVACIDR22002000000000                      | sp | P00533 | EGFR_HUMAN  |
| 1090 | SGDETPGSEVPGDK2000000000000000                          | sp | Q1KMD3 | HNRL2_HUMAN |
| 1091 | SPPLQLSEAELLNQLQR200000000000000000                     | sp | 015015 | ZN646_HUMAN |



|      |                                                   |                       |
|------|---------------------------------------------------|-----------------------|
|      |                                                   | sp P49792 RBP2_HUMAN  |
|      |                                                   | sp Q7Z3J3 RGPD4_HUMAN |
| 1092 | EDALDDSVSSSSVHASPLASSPVR20000                     | sp A6NKT7 RGPD3_HUMAN |
|      |                                                   | sp O14715 RGPD8_HUMAN |
|      |                                                   | sp Q99666 RGPD5_HUMAN |
| 1093 | SPTAALNESLVECPK2000000020000000                   | sp Q53EZ4 CEP55_HUMAN |
| 1094 | ALVVPEPEPDSNSQER200000                            | sp Q5VTR2 BRE1A_HUMAN |
| 1095 | TSPSSPAPLPHQEATPR200000000000000                  | sp P04920 B3A2_HUMAN  |
| 1096 | ESESEDETTPAAPQLIK202000000000000000               | sp O60832 DKC1_HUMAN  |
| 1097 | KGDVEGSQSQDEGEGSGESER200000000000000              | sp Q9UQE7 SMC3_HUMAN  |
| 1098 | EAEQAASEAAGDTPGSSPSSLYEELGQPPR202000000000000000  | sp Q86TC9 MYPN_HUMAN  |
| 1099 | TSSTCSNESLSVGGTSVTPR2020020000000000000           | sp O60343 TBCD4_HUMAN |
| 1100 | ALSSDSILSPAPDAR20000020000000                     | sp Q8IVT2 MISP_HUMAN  |
| 1101 | DGSDYDPYDFSDTEEEMPQVHTPK200000000000000           | sp P25205 MCM3_HUMAN  |
| 1102 | SRSSSVGSSSYPISPAUSR2220020000000000000            | sp Q15149 PLEC_HUMAN  |
| 1103 | WLDESDAEMELR200000000                             | sp Q9P035 HACD3_HUMAN |
| 1104 | RNSCNVGGGGGFK2000000000000                        | sp Q7L2J0 MEPCE_HUMAN |
| 1105 | LFEESDDKEDEDADGK2000000000000                     | sp O43719 HTSF1_HUMAN |
| 1106 | VPVQEIDDDFFPSSGEEAASVGEVGGGGGR2. 2E+19            | sp Q03468 ERCC6_HUMAN |
| 1107 | FIIGSVSEDNSEDEISNLVK200020000000000               | sp Q13085 ACACA_HUMAN |
| 1108 | SSSVGSSSYPISPAUSR2000000                          | sp Q15149 PLEC_HUMAN  |
| 1109 | TSQVGAASAPAKESPR2000                              | sp Q13428 TCOF_HUMAN  |
| 1110 | SSGSETEQVDFSDR2202000000002000                    | sp O95251 KAT7_HUMAN  |
| 1111 | QSQQPMKPISPVKDPVSPASQK20000002000000              | sp Q12888 TP53B_HUMAN |
| 1112 | SVVSDLEADV2002000000000                           | sp P11388 TOP2A_HUMAN |
| 1113 | ASSLGEIDESSEL2000000000000                        | sp Q16513 PKN2_HUMAN  |
| 1114 | IASDEEIQGTK2000000000                             | sp Q8WX93 PALLD_HUMAN |
| 1115 | GVMAVTAVTATAASDR2000                              | sp Q7Z4V5 HDGR2_HUMAN |
| 1116 | IVEPEVVGESDSEVEGDWR200000000000                   | sp P55081 MFAP1_HUMAN |
| 1117 | EDKSPSEESAPTTSPESVSGSVSSGSSGR2E+19                | sp P54725 RD23A_HUMAN |
| 1118 | VSPASPAGSPADFVHGESLGR2. 0000002E+23               | sp Q96C92 SDCG3_HUMAN |
| 1119 | VSALEEDMDDVESSEEEEEDEKLER2. 00000000002E+25       | sp Q8NAV1 PR38A_HUMAN |
| 1120 | DFLSGPDYDHTVGSDEDEEVEGEP202000000000000           | sp Q6ZW31 SYDE1_HUMAN |
| 1121 | TSPCQSPTISEGPVPSLPIRPSR2. 0002E+22                | sp O43426 SYNJ1_HUMAN |
|      |                                                   | sp P01891 1A68_HUMAN  |
|      |                                                   | sp P10316 1A69_HUMAN  |
| 1122 | KGGSYSQAASSDSAQGSVSLTACK2E+20                     | sp P05534 1A24_HUMAN  |
|      |                                                   | sp P30447 1A23_HUMAN  |
|      |                                                   | sp Q09160 1A80_HUMAN  |
|      |                                                   | sp P01892 1A02_HUMAN  |
| 1123 | GGAPDPSPGATATPGAPAQSSPDAR200000                   | sp O95365 ZBT7A_HUMAN |
| 1124 | LQSWEETWSLIPEK2000000000000                       | sp Q7Z736 PKHH3_HUMAN |
| 1125 | SIGSAVDQGNESIVAK2000000000000                     | sp Q9H0H5 RGAP1_HUMAN |
| 1126 | LSVPTSDEEDEVPAKPR200020000000000000               | sp Q8NE71 ABCF1_HUMAN |
| 1127 | TCEERPAEDGSDEEDPDSMEAPTR200000001000000           | sp Q9H6Y2 WDR55_HUMAN |
| 1128 | GAEAFGDSEEDGEDVFEVEK200000000000000               | sp Q99549 MPP8_HUMAN  |
| 1129 | ASAPSPNAQVACDHCLK20000000000000000                | sp Q14258 TRI25_HUMAN |
| 1130 | YGPADVEDTTGSGATDSK200                             | sp P24534 EF1B_HUMAN  |
| 1131 | TTSSSDLTSSSSGPR20000000000000000                  | sp Q5QP82 DCA10_HUMAN |
| 1132 | MDSDEDEKEGEEK2000000000000                        | sp Q96ST2 IWS1_HUMAN  |
| 1133 | NAPAAVDEGSI SPR2000                               | sp P28715 ERCC5_HUMAN |
| 1134 | ASDLEDEESAAR2000000000000                         | sp Q86VM9 ZCH18_HUMAN |
| 1135 | NGFPHPEDCNPSEAASEESNSEIEQEIPEVK200200000000000000 | sp Q9NR30 DDX21_HUMAN |
| 1136 | SVEDDEEGHLICQSGDVLSAR2E+21                        | sp P49759 CLK1_HUMAN  |

|      |                                                     |                       |
|------|-----------------------------------------------------|-----------------------|
| 1137 | SAFTPATATGSSPSPVLGQGEK2000000000                    | sp Q15811 ITSN1_HUMAN |
| 1138 | RPPSPDIVLSDNEQPSSPR200000020000000000               | sp Q86YP4 P66A_HUMAN  |
| 1139 | LTPLPEDNSMNVDDQGDPSDR20000000000000                 | sp P78527 PRKDC_HUMAN |
| 1140 | AAVQELSSSILAGEDPEER200000000000                     | sp P49768 PSN1_HUMAN  |
| 1141 | ATLLNVPDLSDSIHSANASER20020002000                    | sp Q07157 ZO1_HUMAN   |
| 1142 | VAAAAGSGSPPGSPGHDR200000000000                      | sp Q9BTU6 P4K2A_HUMAN |
| 1143 | SSQSSSQFSGIGR2000000000000000                       | sp Q92841 DDX17_HUMAN |
| 1144 | QVVSVVQDEEVGLPFEASPESPPPASPDPGVTEIR2000020000000000 | sp Q96TA1 NIBL1_HUMAN |
| 1145 | SSSLGSYDDEQEDLTPAQLTR3000000000000000               | sp 094988 FA13A_HUMAN |
| 1146 | ASSHSSQTQGGGSVTK22000000000000                      | sp P02545 LMNA_HUMAN  |
| 1147 | NYQQNYQNSSEGEKNEGSESAPEGQAQQR2E+19                  | sp P67809 YBOX1_HUMAN |
| 1148 | APVQPQQSPAAAPGGTDEKPSGK2000000000000000             | sp Q13200 PSMD2_HUMAN |
| 1149 | AAFTTPDHAPLSPQSSVASSGSEQTEEQGSSR200000000000000000  | sp Q5PRF9 SMAG2_HUMAN |
| 1150 | RPMEEDGEKSPSK20000                                  | sp Q12906 ILF3_HUMAN  |
| 1151 | TDCEPVGLEPAVEQSSAASELAEASSEELAEAPTEAPSPEAR200000    | sp Q15424 SAFB1_HUMAN |
| 1152 | DPSPEADAPVLGSPEK200000000020000                     | sp Q14151 SAFB2_HUMAN |
| 1153 | KLSSSEPYEEDEFNDDQSIK2200300000000000000             | sp 015234 CASC3_HUMAN |
| 1154 | SPHSPSPATPPSQSSSCSDAPMLSTVHSAK2.002020002E+31       | sp Q9H4L7 SMRCD_HUMAN |
| 1155 | VNSNGKESPGSSEFFQEAVSHGK2.00002E+21                  | sp Q9NYF8 BCLF1_HUMAN |
| 1156 | QENCGAQQVPAGGTSTPPSSPVR2000020000                   | sp Q8N108 MIER1_HUMAN |
| 1157 | ILATPPQEDAPSVDIANIR2000000000                       | sp Q96G46 DUS3L_HUMAN |
| 1158 | EVSDDEAEKEDKEEEK2000000000000000                    | sp P29401 TKT_HUMAN   |
| 1159 | ELEKPIQSKPQSPVIQAAAVSPK2000000002000                | sp P07900 HS90A_HUMAN |
| 1160 | TRPGSFQSLSDALSDTPAK2000000000000000                 | sp Q9Y6D5 BIG2_HUMAN  |
| 1161 | ISFPGSSESPLSSK2000000                               | sp Q9H9C1 SPE39_HUMAN |
| 1162 | SDSGGSSEPFDR200000000000                            | sp Q15911 ZFH3_HUMAN  |
| 1163 | IKNENTEGSPQEDGVELEGLK20000000000000                 | sp P48634 PRC2A_HUMAN |
| 1164 | HTGPNSPDTANDGFVR200000000000                        | sp P11388 TOP2A_HUMAN |
| 1165 | SPSPAPAPAAAAAGPPTR2.02E+19                          | sp P31943 HNRH1_HUMAN |
| 1166 | VISDSESDIGGSDVEFKPDK2.020200002E+19                 | sp P55795 HNRH2_HUMAN |
| 1167 | LPQSSSESSPPSPQPTK2000000                            | sp Q9H7N4 SFR19_HUMAN |
| 1168 | RPDYAPMESSDEEDEFQFIK2200000000000000                | sp P52701 MSH6_HUMAN  |
| 1169 | AKSPQPPVEEEDHFDDTVVCLDTYNCDLHFK2E+30                | sp Q9UQ35 SRRM2_HUMAN |
| 1170 | TPPPPTLSPAAITVGR20000002000000000                   | sp P55081 MFAP1_HUMAN |
| 1171 | REESPMDVDQSPSAQDTQSIASDGTQGEK2E+20                  | sp Q00839 HNRPU_HUMAN |
| 1172 | VDEDSAEDTQSNQDGK200000000000                        | sp Q8NDX5 PHC3_HUMAN  |
| 1173 | LDDAHSLSGAGEGYEPISDDELDEILAGDAEK2.0000030002E+25    | sp Q7Z6Z7 HUWE1_HUMAN |
| 1174 | SASSGAEGDVSSER200000000000                          | sp Q9H2G2 SLK_HUMAN   |
| 1175 | TIGGGDDSFNTFFSETGAGK20000000000000                  | sp Q5T200 ZC3HD_HUMAN |
| 1176 | SQSSEGVSSLSPPSNSLETQSQSLSR2E+24                     | sp Q8TEA8 DTD1_HUMAN  |
| 1177 | YGVYEDENYEVGSDDEEIPFK2000000000                     | sp P68363 TBA1B_HUMAN |
| 1178 | TNSPAYSDISDAGEDGEGK200020020000000000               | sp Q9BQE3 TBA1C_HUMAN |
| 1179 | SDISDQEEDEESEGCVPVINLSK2.002E+23                    | sp Q71U36 TBA1A_HUMAN |
| 1180 | APAGQEEPPTPPSSPLSAEQQLDR2000200000000000            | sp Q13748 TBA3C_HUMAN |
| 1181 | QLSSGVSEIR200000000                                 | sp Q6PEY2 TBA3E_HUMAN |
| 1182 | GSYDGLGGPIITTVQVITPK20000000000000000000            | sp 095155 UBE4B_HUMAN |
| 1183 | DQTASAPATPLVNK20002000000                           | sp 015541 R113A_HUMAN |
| 1184 | LTSVSSSVDFDQR200220000000                           | sp 015014 ZN609_HUMAN |
|      |                                                     | sp Q15154 PCM1_HUMAN  |
|      |                                                     | sp P13051 UNG_HUMAN   |
|      |                                                     | sp P04792 HSPB1_HUMAN |
|      |                                                     | sp P61978 HNRPK_HUMAN |
|      |                                                     | sp Q53SF7 COBL1_HUMAN |
|      |                                                     | sp Q5T3F8 CSCL2_HUMAN |

|      |                                                       |                       |
|------|-------------------------------------------------------|-----------------------|
| 1185 | SAPASPTHPLMSPR2000200000010000                        | sp P85037 FOXK1_HUMAN |
| 1186 | KPPAPSPVQSQSPSTNWSPAVPVK2.00000002E+19                | sp Q8IYB3 SRRM1_HUMAN |
| 1187 | AQPFGFIDSDDTDAEEER2000000000                          | sp Q14676 MDC1_HUMAN  |
| 1188 | QASTDAGTAGALTPQHVR200000000000                        | sp P46937 YAP1_HUMAN  |
| 1189 | SQSSEGVSSLSSSPSNSLETQSQSLSR2000000000000000           | sp Q95155 UBE4B_HUMAN |
| 1190 | TVSQQSFDGVS LDSSGPEDR2E+20                            | sp Q6BDS2 URFB1_HUMAN |
| 1191 | KISENSYSLDDLEIGPGLSSSTFDSEK2E+26                      | sp Q9UHB6 LIMA1_HUMAN |
| 1192 | EMLMEDVGSEEEQEEDEAPFQEK1.0100002E+23                  | sp Q9H1E3 NUCKS_HUMAN |
| 1193 | NGFPHPPEPCNPSEAASEESNSEIEQEIPVEQK20000200000000000000 | sp Q9NR30 DDX21_HUMAN |
| 1194 | GSLDESSLGFGYPK2000000000000000                        | sp Q9BUZ4 TRAF4_HUMAN |
| 1195 | NLTANDPSQEYVASEGEEDPEVEFLK2000000000000000            | sp Q86X95 CIR1_HUMAN  |
| 1196 | GSISSTSEVHSPNVGLR202000000000000000                   | sp Q8WWQ0 PHIP_HUMAN  |
| 1197 | TVSASSTGDLPK200200000000                              | sp P78362 SRPK2_HUMAN |
| 1198 | SSSVGSSSYPISPAISR22000000000000000000                 | sp Q15149 PLEC_HUMAN  |
| 1199 | EKQSSEEEKETR220000000000                              | sp Q92504 S39A7_HUMAN |
| 1200 | SQDQDSEVNELSR2000000000                               | sp Q86VM9 ZCH18_HUMAN |
| 1201 | VIHFVSGETMEEYSTDEDEVDGLEK100022000000000000           | sp Q8N128 F177A_HUMAN |
| 1202 | TPVDESDDI QHDEIPTGK200000000000000000                 | sp Q86TC9 MYPN_HUMAN  |
| 1203 | TADSSSEDEEEYVVEK220200000000000000                    | sp P45973 CBX5_HUMAN  |
| 1204 | EGEPTVYSDEEPEKDESAR2000000000000000                   | sp 000264 PGRC1_HUMAN |
| 1205 | SGSSSPDSEITELKFPSINH2.2E+19                           | sp P17812 PYRG1_HUMAN |
| 1206 | ALSIHSDVEDSGESEEGATDER20000200200000000000            | sp P15822 ZEP1_HUMAN  |
| 1207 | VNFSEGETEEDDQDSSHSSVTTVK2.00002E+22                   | sp Q5JTV8 TOIP1_HUMAN |
| 1208 | LPPPPPQAPPEEENESEPEEPSGVEGAAFQSR20000000000000000000  | sp 060341 KDM1A_HUMAN |
| 1209 | SASSDTSEELNSQDSPPK2200000000000000                    | sp 014745 NHRF1_HUMAN |
| 1210 | TPENLITEIR200000000000                                | sp Q7Z4H7 HAUS6_HUMAN |
| 1211 | YSPSQNSPIHHIPSR20020000000000                         | sp Q9NYF8 BCLF1_HUMAN |
| 1212 | HNDIVDSDSAEDR2020000000                               | sp P78316 NOP14_HUMAN |
| 1213 | NMGGPYGGNYGPGSGGGYGGGR20000000                        | sp P22626 ROA2_HUMAN  |
| 1214 | SDGACDPSDDKENSQIAQDHQK20200000000000000000            | sp Q9UIG0 BAZ1B_HUMAN |
| 1215 | EISDDEAEEKGEK20000000000000                           | sp P08238 HS90B_HUMAN |
| 1216 | SRSRSTPPSSAGLGSNSAPPIDSR2.020202E+26                  | sp Q58FF7 H90B3_HUMAN |
| 1217 | TDDTAQVTSDYETNNNSDSSDIVQNEDETECLR2.000202E+21         | sp Q8IWX8 CHERP_HUMAN |
| 1218 | AGEPNPDAEEANSPDVTAGCDPAGVHPPR2E+25                    | sp Q14432 PDE3A_HUMAN |
| 1219 | VQISPDSSGLPER200000000000                             | sp Q08J23 NSUN2_HUMAN |
| 1220 | SCSSPAVSAVSQLPLSPK20000000000002000                   | sp Q92945 FUBP2_HUMAN |
| 1221 | AGGGGGLGAGSPALSGGQGR200000000000                      | sp Q9Y2F5 ICE1_HUMAN  |
| 1222 | TPSSSSTLAYSPR220000000000                             | sp Q6IQ22 RAB12_HUMAN |
| 1223 | QESDPEDDDVKKPALQSSVATSK2E+22                          | sp Q6Q0C0 TRAF7_HUMAN |
| 1224 | SQSSGSSATHPISVPGAR200000000000000000                  | sp Q9H307 PININ_HUMAN |
| 1225 | ESVPEFPLSPPK20000                                     | sp Q9Y4H2 IRS2_HUMAN  |
| 1226 | VQEHEDSGDSEVENEAK200200000000                         | sp P16949 STMN1_HUMAN |
| 1227 | SLSEQPVMdTATATEQAK200000000000000000                  | sp Q9Y5J1 UTP18_HUMAN |
| 1228 | SSGFISELPSEEGK2000000000000000                        | sp P18615 NELFE_HUMAN |
| 1229 | KGSSSVCSVASSSDISLGSTK2E+20                            | sp Q5VZK9 LR16A_HUMAN |
| 1230 | ELVGDGSGEGDHEPSGSETEEDTSSSPHR2020000000000000         | sp Q9ULT8 HECD1_HUMAN |
| 1231 | SGSSSPDSEITELKFPSINH2.22002E+19                       | sp P0DJ93 SIM13_HUMAN |
| 1232 | GYSPYSVSGSGSTAGSR2000000000000200                     | sp P17812 PYRG1_HUMAN |
| 1233 | VSEEQTPPSPAGAMSTAMGR2000000000000000                  | sp Q15149 PLEC_HUMAN  |
| 1234 | ADEPSSEESDLEIDK200000000000                           | sp Q16666 IF16_HUMAN  |
| 1235 | HQASDSENEEPPKPR20200000000000                         | sp P50502 F10A1_HUMAN |
| 1236 | EAAAGIQWSEEEETEDEEEKEVTPESGPPK2.0002E+22              | sp Q8IZP2 ST134_HUMAN |
|      |                                                       | sp Q96ST2 IWS1_HUMAN  |
|      |                                                       | sp P46087 NOP2_HUMAN  |

|      |                                             |                       |
|------|---------------------------------------------|-----------------------|
| 1237 | LESLYSDEEDESAVGADK20000000000000            | sp Q9UP95 S12A4_HUMAN |
| 1238 | HGSGADSDYENTQSGDPLLGLEGK203000000000000000  | sp Q9Y2X7 GIT1_HUMAN  |
| 1239 | GSSGSPAHAESYSSGGGGQQK200000000000000000     | sp P15408 FOSL2_HUMAN |
| 1240 | GQESSDQEVDVESIDFSK202000000000000000        | sp Q96JM3 CHAP1_HUMAN |
| 1241 | SPLGGGGGSGASSQAACLK2E+19                    | sp Q68DK7 MSL1_HUMAN  |
| 1242 | QEPLEEDSPSSSAGLDK200000000000               | sp P15408 FOSL2_HUMAN |
| 1243 | VCSSDSDSSLQVVK220200000000                  | sp Q9NSI6 BRWD1_HUMAN |
| 1244 | FSGEEGIEDESGTENR200000000000000000          | sp Q9Y2W1 TR150_HUMAN |
| 1245 | HGSGADSDYENTQSGDPLLGLEGK2.000003E+22        | sp Q9Y2X7 GIT1_HUMAN  |
| 1246 | SPQPVCSPAGSEGTPK20002000000                 | sp Q6KC79 NIPBL_HUMAN |
| 1247 | SSTPPGESYFGVSSLQK200000000000000000         | sp Q9UQ35 SRRM2_HUMAN |
| 1248 | SQSSEGVSSLSSSPNSLETQSQSLSR2.02E+19          | sp O95155 UBE4B_HUMAN |
| 1249 | EVSSRPSTPGLSVVSGISATSEIPNKIEDLR2.2E+26      | sp Q14C86 GAPD1_HUMAN |
| 1250 | KPPAPSPVQSQSPSTNWSPAVPVK2.00000002E+19      | sp Q8IYB3 SRRM1_HUMAN |
| 1251 | KPHDCESSTVSEEDYFSSHR22020000000000          | sp Q9H4H8 FA83D_HUMAN |
| 1252 | SSGHSSSELSPDAVEK2000020000000               | sp Q9UQ35 SRRM2_HUMAN |
| 1253 | ASQEANLLTLAQK20000000000000                 | sp Q6PJG2 EMSA1_HUMAN |
| 1254 | SEEDNEIESEEEVQPK200000000                   | sp P52701 MSH6_HUMAN  |
| 1255 | SPPPESVDTPSTK2000000000000000               | sp P46013 KI67_HUMAN  |
| 1256 | EPTPSIASDISLPIATQELR20000000000000          | sp A0FGR8 ESYT2_HUMAN |
| 1257 | SEEDSSDHENEDEFSDDEEDFLNSTK2.00022E+26       | sp Q5QJE6 TDIF2_HUMAN |
| 1258 | DTVIVSEPSEDEESQGLPTMAR200200000000000000    | sp Q9H4L7 SMRCD_HUMAN |
| 1259 | RQSSGSATNVASTPDNR2002000000000000           | sp Q7Z460 CLAP1_HUMAN |
| 1260 | GLLYDSDEEDEERPAR200000000000                | sp P49736 MCM2_HUMAN  |
| 1261 | ELVEPLTPSGEAPNQALLR20000000000000           | sp P00533 EGFR_HUMAN  |
| 1262 | SEGSEYEEIPK200200000000                     | sp P48634 PRC2A_HUMAN |
| 1263 | TIASDSEEEAGKELSDK2020000000000000           | sp Q96ST2 IWS1_HUMAN  |
| 1264 | TQPDGTSVPGEPASPISR2000000                   | sp Q14980 NUMA1_HUMAN |
| 1265 | SVGGSGGGSGFDNLVTR20000000000000             | sp P02545 LMNA_HUMAN  |
| 1266 | GEDVPSEEEEEENGFEEDR2000000000000000         | sp Q9ULX3 NOB1_HUMAN  |
| 1267 | ADRSSLPLDFNDEFSDLGVVQQR200000000000         | sp Q96HH9 GRAM3_HUMAN |
| 1268 | LSFSDSESDNSADSSLPSR202020000000000000       | sp Q03111 ENL_HUMAN   |
| 1269 | NKSTESLQANVQR20000000000000                 | sp P26373 RL13_HUMAN  |
| 1270 | SSGSSSSGLGTVSNPASQR2000000                  | sp Q9UPP1 PHF8_HUMAN  |
| 1271 | QEEESPVERPLK20200000000                     | sp Q96SB4 SRPK1_HUMAN |
| 1272 | FIIGSVSEDNSEDEISNLVK202000200000000000      | sp Q13085 ACACA_HUMAN |
| 1273 | SGSSSPDSEITELK22200000000000                | sp P17812 PYRG1_HUMAN |
| 1274 | FCDSPTSLEMR2000000000                       | sp O15014 ZN609_HUMAN |
| 1275 | KPPAPSPVQSQSPSTNWSPAVPVK2020000000000000    | sp Q8IYB3 SRRM1_HUMAN |
| 1276 | KASQQSNQIQTR20000000000000                  | sp Q05D32 CTSL2_HUMAN |
| 1277 | YSDGDKSDDLVDVSNEDPATPR3.0000002E+24         | sp Q04726 TLE3_HUMAN  |
| 1278 | TADSSSEDEEEYVVEK2220000000000000            | sp P45973 CBX5_HUMAN  |
| 1279 | NLEHLSSFSSDEDDPGYSQDAYK2200000000000000     | sp Q2KHR3 QSER1_HUMAN |
| 1280 | EDTAFSDWSDVDPDR200200000000                 | sp Q5T200 ZC3HD_HUMAN |
| 1281 | ANSFVGTAQYVSPPELLTEK200000000000000000      | sp Q6A1A2 PDPK2_HUMAN |
| 1282 | KTSSVSSISQVSPER2200000000000000             | sp O15530 PDPK1_HUMAN |
| 1283 | GGSTGGGGGFDPPPAYHEVDAEK2E+22                | sp P42356 PI4KA_HUMAN |
| 1284 | RPASPSSPEHLPATPAESPAQR2.002E+19             | sp Q9UPU5 UBP24_HUMAN |
| 1285 | KLSSSSEPYEDEFNDDQSIK200300000000000000      | sp Q9H7L9 SDS3_HUMAN  |
| 1286 | HDYDDSSSEEQAEDSYEASPGSETQR2.20002E+21       | sp Q9H4L7 SMRCD_HUMAN |
| 1287 | QSNASSDVEVEEK2000000000                     | sp P98175 RBM10_HUMAN |
| 1288 | NVLSSLAVYAEDSEPESDGEAGIEAVGSAAEEK2.0003E+29 | sp O75475 PSIP1_HUMAN |
| 1289 | LQALVNSLCAGQSP200                           | sp Q9UHR5 S30BP_HUMAN |
|      |                                             | sp Q6XQ6 PNCB_HUMAN   |

|      |                                                        |                                              |
|------|--------------------------------------------------------|----------------------------------------------|
| 1290 | VGPAGDEEEEEEEELSSSCEEEGEEDR222000000000                | sp P36915 GNL1_HUMAN                         |
| 1291 | ALEQQEAESDSSDTEEKDDDDDEEDVGKR2. 2E+20                  | sp Q9BXY0 MAK16_HUMAN                        |
| 1292 | SPAPGSPDEEGGAEAPAAGIR2. 00002E+21                      | sp O15061 SYNEM_HUMAN                        |
| 1293 | MYSFDDVLEEGK20000000000                                | sp Q8WWI1 LMO7_HUMAN                         |
| 1294 | FDSSLLSSDDETK22000000                                  | sp P28715 ERCC5_HUMAN                        |
| 1295 | SSDEENGPPSPDLDR2000000002000000                        | sp Q96B36 AKTS1_HUMAN                        |
| 1296 | TLSSSAQEDIIR20000000000                                | sp Q9H788 SH24A_HUMAN                        |
| 1297 | ATAPQTQHVSPMR20000                                     | sp P29692 EF1D_HUMAN                         |
| 1298 | DAVFDGSSCISPTIVQQFGYQR2000000000000                    | sp P04049 RAF1_HUMAN                         |
| 1299 | SASPPPATSSSSSSR2020000000000000                        | sp Q9H7N4 SFR19_HUMAN                        |
| 1300 | EPHSPADQPEQQAESTL TSAETR2E+20                          | sp Q9H2Y7 ZN106_HUMAN                        |
| 1301 | TLSNAEDYLDDESD20000000000200                           | sp Q92882 OSTF1_HUMAN                        |
| 1302 | EVSSRPSTPGLSVVSGISATSEIPNK2. 2E+21                     | sp Q14C86 GAPD1_HUMAN                        |
| 1303 | NGFPHPEDCNPSEAASEESNSEIEQEIPVEQK20200000000000         | sp Q9NR30 DDX21_HUMAN                        |
| 1304 | SGAQASSTPLSPTR2000000000000000                         | sp P02545 LMNA_HUMAN                         |
| 1305 | TVSASSTGDLPK20002000000                                | sp P78362 SRPK2_HUMAN                        |
| 1306 | VSDPISTSESSEEEEEAEATAK2. 0002220E+22                   | sp Q13428 TCOF_HUMAN                         |
| 1307 | KEESEESDDDMGFLFD200000000000                           | sp P05386 RLA1_HUMAN<br>sp P05387 RLA2_HUMAN |
| 1308 | EDKSPSEESAPTTSPESVSGVPSGSSGR2000000000000000000        | sp P54725 RD23A_HUMAN                        |
| 1309 | GRLTPSPDIIVLSDNEASSPR2020000000000000000               | sp Q8WXI9 P66B_HUMAN                         |
| 1310 | SAPASPTHPLMSPR2000000000000000                         | sp P85037 FOXK1_HUMAN                        |
| 1311 | QLSLEGLGVEDLK2000000000000000                          | sp Q9UMZ2 SYNRG_HUMAN                        |
| 1312 | NEEPSEEEIDAPKPK200000000000                            | sp Q9NR30 DDX21_HUMAN                        |
| 1313 | VNFSEEGETEEDDQDSSHSSVTTVK2E+22                         | sp Q5JTV8 TOIP1_HUMAN                        |
| 1314 | GLPSPYNMSSAPGSR2000200                                 | sp P15924 DESP_HUMAN                         |
| 1315 | REPGGWGAGASAPVEDDSDAETYGEENDEQGNYSK2000000000000000000 | sp Q9NQS1 AVEN_HUMAN                         |
| 1316 | HEVSASTQSTPASSR2000000                                 | sp Q01082 SPTB2_HUMAN                        |
| 1317 | KDSSGSVSPNTLSQEEGDQICLYHIR2. 002E+24                   | sp Q9H0J9 PAR12_HUMAN                        |
| 1318 | VVSDADSDSDAVSDK200002020000000                         | sp Q96ST2 IWS1_HUMAN                         |
| 1319 | TLSDESIYNSQR20000000000                                | sp O43166 SIL1_HUMAN                         |
| 1320 | SSSEYTSQSFQSR200000000000                              | sp Q9BTU6 P4K2A_HUMAN                        |
| 1321 | ISSKSPGHMVILDQTK202000000000000                        | sp Q9NWH9 SLTM_HUMAN                         |
| 1322 | RPSQEQSASASSGQPAPLNR2000000000000000                   | sp Q5T1M5 FKB15_HUMAN                        |
| 1323 | TPLSFTNPLHSDDSDSDER2002000000                          | sp Q05209 PTN12_HUMAN                        |
| 1324 | APQTSSSPPVVR2000000                                    | sp Q8IYB3 SRRM1_HUMAN                        |
| 1325 | SVSSPTSSNTPTPK200000000000000                          | sp Q5M775 CYTSB_HUMAN                        |
| 1326 | ASAVSELSR2000                                          | sp Q9Y2W1 TR150_HUMAN                        |
| 1327 | DFDIAEQNESSDEESLR220000000                             | sp Q96KC8 DNJC1_HUMAN                        |
| 1328 | IDEPSTPYHSMGDEDEDACSDTEATEAMAPDILAR2E+26               | sp P41236 IPP2_HUMAN                         |
| 1329 | TVSDNLSNSR2000000000                                   | sp Q96RU3 FNBP1_HUMAN                        |
| 1330 | STDSPGADAELPESAR2000000000000000                       | sp Q9Y4K1 AIM1_HUMAN                         |
| 1331 | KLSGDQITLPTTVDYSSVPK2000000000000000000                | sp O00559 RCAS1_HUMAN                        |
| 1332 | LSSGFDDIDLPSAVK200000000000000                         | sp Q9Y446 PKP3_HUMAN                         |
| 1333 | SGEDEVSGLMR200000000000000                             | sp Q13263 TIF1B_HUMAN                        |
| 1334 | KNAIASDSEADSDTEVPK20200020000000                       | sp Q8WVC0 LEO1_HUMAN                         |
| 1335 | LFEDDSNEKLFDEEEDSSEK2000000000020000                   | sp O43719 HTSF1_HUMAN                        |
| 1336 | EQTSLPTITSLHNIAR2000000000000000                       | sp O94979 SC31A_HUMAN                        |
| 1337 | GGDVSPSPYSSSSWR200000000000                            | sp Q14004 CDK13_HUMAN                        |
| 1338 | AASSSPGSPVASSPSR2002000000000                          | sp Q92538 GBF1_HUMAN                         |
| 1339 | MESEGGADSAEGLDLLDDDDNEDRGDDQLELIK2. 0000002E+32        | sp P07910 HNRPC_HUMAN                        |
| 1340 | THSDASDDEAFTTSK20020000000000                          | sp Q13017 RHG05_HUMAN                        |
| 1341 | QENCGAQQVPAGPGTSTPPSPVVR200020000                      | sp Q96G46 DUS3L_HUMAN                        |

|      |                                                     |                       |
|------|-----------------------------------------------------|-----------------------|
| 1342 | TLSPTPSAEGYQDVR20000000000000                       | sp 014639 ABLM1_HUMAN |
| 1343 | SEPVKEESSELEQPFAQDTSSVGPDR2E+19                     | sp Q15424 SAFB1_HUMAN |
| 1344 | SLSSGSNFCSEQK200200000000                           | sp Q14151 SAFB2_HUMAN |
| 1345 | GAILSEEELAAMSPTAAAVAK2000000000                     | sp 095243 MBD4_HUMAN  |
| 1346 | SSGTASSVAFTPLQGLEIVNPQAAEK2.000000002E+25           | sp P12270 TPR_HUMAN   |
| 1347 | RPDHSGGSPSPPTSEPAR202000000000                      | sp Q8WWY3 PRP31_HUMAN |
| 1348 | EEGELEDGEISDDDNNSQIR20000020000                     | sp Q8TAD8 SNIP1_HUMAN |
| 1349 | EELMSSDLEETAGSTSIPK2000000000000000                 | sp 060293 ZC3H1_HUMAN |
| 1350 | KEESEESDDDMGFGLFD2002000000000000                   | sp 000567 NOP56_HUMAN |
| 1351 | DSELSDTDSGCCLGQSESDK200020000000000000              | sp P05387 RLA2_HUMAN  |
| 1352 | KEESEESDDDMGFGLFD200010000000                       | sp P05386 RLA1_HUMAN  |
| 1353 | SSPNVANQPPSPGGK200000000200000                      | sp Q96T88 UHRF1_HUMAN |
| 1354 | TSSFTEQLDEGTPNR2000000000000000                     | sp P05386 RLA1_HUMAN  |
| 1355 | LTQTSSTEQLNVLETETEVLNK200000000000000000            | sp P05387 RLA2_HUMAN  |
| 1356 | SQSMIDIDGVSCCK200000000000                          | sp P55196 AFAD_HUMAN  |
| 1357 | ASQGLLSSIENSESDSSEAK20000000                        | sp Q13439 GOGA4_HUMAN |
| 1358 | SSGDPEQIKEDSLSEESADAR202000000000                   | sp Q5JSH3 WDR44_HUMAN |
| 1359 | GIPLATGDTSPPELLPGAPLPPPK220000000000000000          | sp 095155 UBE4B_HUMAN |
| 1360 | TFAPLPEFEQEEDDGEVTEDESDFIQPR20020000000000          | sp Q5UIP0 RIF1_HUMAN  |
| 1361 | NVLSSLAVYAEDSEPESDGEAGIEAVGSAAEK2.0002E+21          | sp Q9BVS4 RIOK2_HUMAN |
| 1362 | SVSTPSEAGSQDSGDGAVGSR200000000000000000             | sp 075821 EIF3G_HUMAN |
| 1363 | TESGEETDLISPPQEEVK200000000000000000                | sp Q9UPN9 TRI33_HUMAN |
| 1364 | ASPSPQSSQPLQIHR202000000000000000                   | sp Q9UHR5 S30BP_HUMAN |
| 1365 | SLGEQDQMLRPPEK200000000000000000                    | sp Q13409 DC1I2_HUMAN |
| 1366 | EDYDSVEQDGEDEPGQR2000000000000000                   | sp 043493 TGON2_HUMAN |
| 1367 | RGTGQSDSDIWDTALIK2002000000000000                   | sp Q9HC35 EMAL4_HUMAN |
| 1368 | SRSPTPPSAGLGSNSAPPIPSR2.0202002E+24                 | sp P48681 NEST_HUMAN  |
| 1369 | KASGSENEGYNPGR2020000000000000                      | sp Q9Y5S9 RBM8A_HUMAN |
| 1370 | GAPSSPATGVLSPQPK200000000200000                     | sp Q16637 SMN_HUMAN   |
| 1371 | DSGSDTASAIIPSTTPSVSDDES VVK2000000000               | sp Q8IWX8 CHERP_HUMAN |
| 1372 | TGSGSPFAGNSPAR20000020000                           | sp Q02880 TOP2B_HUMAN |
| 1373 | ANIVDQSHLHDSSQK20000                                | sp Q5SRE5 NU188_HUMAN |
| 1374 | GLGAGAGAGEESPATSLPR200000000                        | sp Q6WKZ4 RFIP1_HUMAN |
| 1375 | ALEQQAESDSSDTEEKDDDDDEEDVGKR2.002E+22               | sp Q9UPT8 ZC3H4_HUMAN |
| 1376 | VTNDISPESSPGVGR20022000000                          | sp Q99570 PI3R4_HUMAN |
| 1377 | SDGACDSPSSDKENSSQIAQDHQK20020000000000000000        | sp 015173 PGRC2_HUMAN |
| 1378 | SAMDSPVPASMFAPESPSPGAAR2000000                      | sp Q9BXY0 MAK16_HUMAN |
| 1379 | ELEENDSENSEFEDDGSEK2002000000000000                 | sp Q15154 PCM1_HUMAN  |
| 1380 | LHNENAEMDS DSSSGTETDLHGSLR1.0002222E+19             | sp Q9UIG0 BAZ1B_HUMAN |
| 1381 | MQNNSPSPISPNTSFTSDGSPSPLGGIK2.002E+19               | sp 000178 GTPB1_HUMAN |
| 1382 | EDKSPSEESAPTTSPESVSGVSPSSGSSGR2.002E+25             | sp 043719 HTSF1_HUMAN |
| 1383 | LSLSPISLAESWEDGSPPPQAR20000000                      | sp Q9H832 UBE2Z_HUMAN |
| 1384 | APGYSPSPVTTASGTTLR2000000000000000                  | sp Q9H0D6 XRN2_HUMAN  |
| 1385 | WKEPGSGGPQNLSPGGR2000000                            | sp P54725 RD23A_HUMAN |
| 1386 | VQVAALQASPLDQDDR2000000000                          | sp A1L170 CA226_HUMAN |
| 1387 | QVVSVVQDEEVGLPFEASPESPPPASP DGVTEIR2000000000000000 | sp Q9HCK8 CHD8_HUMAN  |
| 1388 | SEGSEYEEIPKR20020000000000                          | sp Q9H0W8 SMG9_HUMAN  |
| 1389 | KPPAPSPVQSQSPSTNWS PAVPVKK2.000002E+20              | sp Q9UDY2 ZO2_HUMAN   |
| 1390 | KPEDVLDDDDAGSAPLKSSGQH QNDK2000000000               | sp Q96TA1 NIBL1_HUMAN |
| 1391 | ELTPASPTCTNSVSK200000000000                         | sp P48634 PRC2A_HUMAN |
| 1392 | EGSQGELTPANSQSR2000000000000000                     | sp Q8IYB3 SRRM1_HUMAN |
|      |                                                     | sp P35613 BASI_HUMAN  |
|      |                                                     | sp P28715 ERCC5_HUMAN |
|      |                                                     | sp Q13098 CSN1_HUMAN  |

|      |                                                |                       |
|------|------------------------------------------------|-----------------------|
| 1393 | KSLDSDESEDEEDDYQQK200200000000000              | sp Q13442 HAP28_HUMAN |
| 1394 | HSPIAPSSPSPQVLAQK20000200200000000             | sp Q9NQS7 INCE_HUMAN  |
| 1395 | TQTPPVSPAPQPTTEER200000000000000               | sp Q14247 SRC8_HUMAN  |
| 1396 | TNSMSSSGLGSPNR20000                            | sp Q9NZN8 CNOT2_HUMAN |
| 1397 | DLCPSEGESDAEAESK2000200000000                  | sp O15119 TBX3_HUMAN  |
| 1398 | REESPMVDVQPSQAQDTQSIASDGTQGEK1.000002E+26      | sp Q7Z6Z7 HUWE1_HUMAN |
| 1399 | SGSEEVLCDSICGNK200000000000000                 | sp Q14134 TRI29_HUMAN |
| 1400 | VLSSTSEEDEPGVVK2020000000000                   | sp Q8NI08 NCOA7_HUMAN |
| 1401 | DLQSPDFTTGFHSDK2000000000000                   | sp Q9P2D0 IBTK_HUMAN  |
| 1402 | SLGGESSGGTTPVGSFHTEAAR220000000000000          | sp O15085 ARHGB_HUMAN |
| 1403 | KPRPSEGDEDCLPASK2000000000000                  | sp P78346 RPP30_HUMAN |
| 1404 | STGSATSLASQGER22000000000                      | sp Q5SW79 CE170_HUMAN |
| 1405 | AIPELDAYEA EGLALDDEDVEELTASQR2000              | sp P49736 MCM2_HUMAN  |
| 1406 | SPQQSAALPR20000000000                          | sp Q6IBW4 CNDH2_HUMAN |
| 1407 | RGSQKSTDSPGADAELPESAAAR2.000002E+20            | sp Q9Y4K1 AIM1_HUMAN  |
| 1408 | KSSLTQEEAPVSWEK200000000000000                 | sp Q76L83 ASXL2_HUMAN |
| 1409 | DPTSLGLVLAQEAADSTSEGLEDAVHSR202000000000000    | sp Q27J81 INF2_HUMAN  |
| 1410 | TGSTSSKEDDYESDAATIVQK2E+19                     | sp Q5T4S7 UBR4_HUMAN  |
| 1411 | LSLNNDIFEANSDDQSETK20200000000                 | sp Q99549 MPP8_HUMAN  |
| 1412 | LDSPPSPITEASEAAEAAEAGNLAVSSR2.000000002E+27    | sp Q9C0C2 TB182_HUMAN |
| 1413 | KPSTDEQTSSAEEDVPTCGYLNVLNSNR2.2E+20            | sp Q8N556 AFAP1_HUMAN |
| 1414 | KTSDANETEDHLESLICK20000000000000000            | sp Q09161 NCBP1_HUMAN |
| 1415 | YLATSQPRPDSSGSH200                             | sp Q9C0H2 TTYH3_HUMAN |
| 1416 | SGSPSDNSGAEEMEVSLAKPK2.0200002E+21             | sp P31749 AKT1_HUMAN  |
| 1417 | SNCLGTDEDSQDSSDGIPSAAPR2000200000000000000     | sp Q92993 KAT5_HUMAN  |
|      |                                                | sp P01891 1A68_HUMAN  |
|      |                                                | sp P10316 1A69_HUMAN  |
| 1418 | KGGSYSQAASSDSAQGS DVSLTACK2002000000           | sp P01892 1A02_HUMAN  |
|      |                                                | sp P05534 1A24_HUMAN  |
|      |                                                | sp P30447 1A23_HUMAN  |
|      |                                                | sp Q09160 1A80_HUMAN  |
| 1419 | LSHEDDHILEDAGSSDISSDAACTNPNK200200000000000    | sp Q92576 PHF3_HUMAN  |
| 1420 | NAIASDSEADSDTEVPK202000200000000               | sp Q8WVC0 LEO1_HUMAN  |
| 1421 | SSLSSHSHQSQIYR202000000000000                  | sp O15027 SC16A_HUMAN |
| 1422 | GIPLATGDTSPPELLPGAPLPPPK20000000000000000      | sp O75821 EIF3G_HUMAN |
| 1423 | LFPEFDSDYDEVPEEGPGAPAR20000000000000000        | sp Q96P48 ARAP1_HUMAN |
| 1424 | SPSPPDGSPAATPEIR200000000000000                | sp O00499 BIN1_HUMAN  |
| 1425 | GSISSTSEVHSPNVGLR220000000000000               | sp Q8WWQ0 PHIP_HUMAN  |
| 1426 | SGSMDPSGAHPSVR2100000000000                    | sp Q07666 KHDR1_HUMAN |
| 1427 | TSPSGGTWSSVVGVPVR20000000000000000             | sp Q99700 ATX2_HUMAN  |
| 1428 | MNSYPYLADR200000000                            | sp Q9Y580 RBM7_HUMAN  |
| 1429 | RPGAQPLPPPPPSQSPEPTPHPR20000000000             | sp Q9UIS9 MBD1_HUMAN  |
| 1430 | LQDISSELLATGAGLSESEAE PDGHNITELPQAVAGR2.02E+23 | sp Q9NQ55 SSF1_HUMAN  |
| 1431 | SKSEEHAEDSVMDDHFR20000000000000000             | sp Q8NC51 PAIRB_HUMAN |
| 1432 | SQSSDTEQQSPTSGGGK200000000000000               | sp P23588 IF4B_HUMAN  |
| 1433 | TPLLSLSATSNNSTVACIDR202200000000000            | sp P00533 EGFR_HUMAN  |
| 1434 | SPLTILQDDNSPGTLTLR2000000000200000000          | sp Q99618 CDCA3_HUMAN |
| 1435 | QEKPAEKPAETPVATSPTATDSTSGDSSR200000000000000   | sp P54727 RD23B_HUMAN |
| 1436 | DSQDASAEQSDHDDEVASLASASGGFGTK2E+20             | sp Q6P2E9 EDC4_HUMAN  |
| 1437 | ALDISLSSGEEDEGDEEDSTAGTTK2.022E+21             | sp Q8IY81 SPB1_HUMAN  |
| 1438 | SSGSETEQVVD FSDR2000000000000                  | sp O95251 KAT7_HUMAN  |
| 1439 | RPNEDSDEDEEK20000000                           | sp Q12996 CSTF3_HUMAN |
| 1440 | SPDLLDASAVSATS R200000000000000                | sp O60499 STX10_HUMAN |
| 1441 | GSISSTSEVHSPNVGLR220000000000000               | sp Q8WWQ0 PHIP_HUMAN  |

|      |                                                    |                       |
|------|----------------------------------------------------|-----------------------|
| 1442 | VTTEIQLPSQSPVEEQSPASLSSLR200000000000000000        | sp Q8WWI1 LMO7_HUMAN  |
| 1443 | LFDEEEDSSEKLFDDSDER2200000020000                   | sp O43719 HTSF1_HUMAN |
| 1444 | GAPSSPATGVLSPQGK2000000000000000                   | sp Q5SRE5 NU188_HUMAN |
| 1445 | SSSMSYVDGFIGTWPK2000000000000000                   | sp Q08AD1 CAMP2_HUMAN |
| 1446 | SDKSPDLAPTPAQSTPR2000000000000000                  | sp Q9BY44 EIF2A_HUMAN |
| 1447 | LHKPPADSGVDLR2000000                               | sp O15427 MOT4_HUMAN  |
| 1448 | SSSSSSGGGLLPYPR2002000000000000                    | sp O60293 ZC3H1_HUMAN |
| 1449 | SPGSTPTTSSQAPQK200200000000000000                  | sp P35658 NU214_HUMAN |
| 1450 | DQQPSGSEGEDDDAEAAALKK2020000000000000              | sp Q9NXG2 THUM1_HUMAN |
| 1451 | ERESEDELEEANGNNPIDIEVDQNK2E+22                     | sp Q9UKL0 RCOR1_HUMAN |
| 1452 | EESSEAEAPVQR2000000000000000                       | sp Q9BW71 HIRP3_HUMAN |
| 1453 | VTNDISPESSPGVGR20002000000                         | sp Q15154 PCM1_HUMAN  |
| 1454 | IALESEGRPEEQMESDNCSGGDDWTHLSSK200020000000000000   | sp Q13501 SQSTM_HUMAN |
| 1455 | GIPLATGDTSPPELLPGAPLPPPK2E+20                      | sp O75821 EIF3G_HUMAN |
| 1456 | DDAEESSEPEEENVGNDTK222000000000000000              | sp Q13823 NOG2_HUMAN  |
| 1457 | AGMSSNQSISPVLDVPR220000020000000000                | sp Q9UQ35 SRRM2_HUMAN |
| 1458 | SIQDLTVGTGEPGVSSR20000000000000000000              | sp O43318 M3K7_HUMAN  |
| 1459 | SPTGPSNSFLANMGTVAHK2E+20                           | sp Q96I25 SPF45_HUMAN |
| 1460 | KNSTDLDAPEDPTSPK2000000000002000                   | sp Q96RK0 CIC_HUMAN   |
| 1461 | VMTIPYQMPASSPVICAGGQDR20000000000000               | sp Q15365 PCBP1_HUMAN |
| 1462 | VEEDLKADEPSSEESDLEIDK220020000000                  | sp P50502 F10A1_HUMAN |
| 1463 | TGSVQTPPDLESSEEVDAEAGEPEVVGPK2.0020000022E+27      | sp Q8IZP2 ST134_HUMAN |
| 1464 | QSAGPNSPTGGGGGGGGGTR2E+20                          | sp P28290 SSFA2_HUMAN |
| 1465 | VISDESSEDIGGSDVEFKPDTK2.0202E+19                   | sp A7E2V4 ZSWM8_HUMAN |
| 1466 | SSTPLPTISSAENTR200000000000000000                  | sp P52701 MSH6_HUMAN  |
| 1467 | NGFPHPEDCNPSEAASEESNSEIEQEIPVEQK200202000000000000 | sp P42167 LAP2B_HUMAN |
| 1468 | HGSGADSDYENTQSGDPLLGLEGK2E+22                      | sp P42166 LAP2A_HUMAN |
| 1469 | QSSGSATNVASTPDNR2000000000000000                   | sp Q9NR30 DDX21_HUMAN |
| 1470 | SNPSIQATLNK2000000000000000                        | sp Q9Y2X7 GIT1_HUMAN  |
| 1471 | NSSDSAIDNPKPNK2000000000000000                     | sp Q7Z460 CLAP1_HUMAN |
| 1472 | GPAFNMA SPESDFGINLK20000000000000                  | sp Q6UUV7 CRT3_HUMAN  |
| 1473 | AESPESAIESTQSTPQK20000000000020000                 | sp P46100 ATRX_HUMAN  |
| 1474 | SSTPLPTISSAENTR220000000000000000                  | sp Q09666 AHNK_HUMAN  |
| 1475 | GNAEGSSDEEGKLVIDEPAK2000000000000000               | sp Q9NTI5 PDS5B_HUMAN |
| 1476 | GPKPEPPGSGSPAPPR202000000                          | sp P42167 LAP2B_HUMAN |
| 1477 | SVASNQSEMEFSSLQDMPK2.00200001E+19                  | sp P42166 LAP2A_HUMAN |
| 1478 | ALFKPPEDSQDDESDDAEQQTTK20200000000000              | sp P51858 HDGF_HUMAN  |
| 1479 | TDDTAQVTSYETNNNSDSSDIVQNEDETECLR3.000000022E+23    | sp Q9UKJ3 GPTC8_HUMAN |
| 1480 | APYQENDGYCPDLELSDSEAESDGNKEK20200000000000         | sp Q8N163 CCAR2_HUMAN |
| 1481 | HSSISPSTLTLK20200000000                            | sp Q13769 THOC5_HUMAN |
| 1482 | LQPSSPENSLDPFPPR2000000000000000                   | sp Q14432 PDE3A_HUMAN |
| 1483 | TGSCSELDACPSK2000000000000000                      | sp Q92613 JADE3_HUMAN |
| 1484 | ATLLNVPDLSDSIHSANASER20020000000                   | sp Q14004 CDK13_HUMAN |
| 1485 | SKSDGEAKPEPSPR2000000000000000                     | sp Q8WWM7 ATX2L_HUMAN |
| 1486 | TPSPPPPPIEDIALGK202000000000000000                 | sp Q9H1H9 KI13A_HUMAN |
| 1487 | NASASFQLEDKK202000000000                           | sp Q07157 ZO1_HUMAN   |
| 1488 | VNSGDTEVGSSLLR2000000000000000                     | sp P26358 DNMT1_HUMAN |
| 1489 | KPATPAEDDEDDIDLFGSDNEEDKEAAQLR2E+29                | sp Q5T200 ZC3HD_HUMAN |
| 1490 | APSPPLSQVFQTR2000000000000000                      | sp Q99543 DNJC2_HUMAN |
| 1491 | TPLALAGSPTPK200000                                 | sp O75592 MYCB2_HUMAN |
| 1492 | SCDELSPVSPTQGGYPSEPTR2000000000000000              | sp P29692 EF1D_HUMAN  |
|      |                                                    | sp Q9NRA8 4ET_HUMAN   |
|      |                                                    | sp O95785 WIZ_HUMAN   |
|      |                                                    | sp Q9HCD6 TANC2_HUMAN |



|      |                                                      |                       |
|------|------------------------------------------------------|-----------------------|
| 1493 | SLSSPTVTLAPLEGAK2000000000000000                     | sp Q96PU5 NED4L_HUMAN |
| 1494 | EVSSRPSTPGLSVVSGISATSEIPNK2.002E+24                  | sp Q14C86 GAPD1_HUMAN |
| 1495 | ELQGDGPPSSPTNDPTVK2000000000                         | sp Q12873 CHD3_HUMAN  |
| 1496 | SSSMSLTGAYASGIPSSSR2200000000000000                  | sp Q96HA1 P121A_HUMAN |
| 1497 | ENSTVDFSK20000000                                    | sp Q9Y6M7 S4A7_HUMAN  |
| 1498 | RQSSGSATNVASTPDNR2000000000000000                    | sp Q6U841 S4A10_HUMAN |
| 1499 | DSGNWDTSGSELSEGELEK20200200000000                    | sp Q7Z460 CLAP1_HUMAN |
| 1500 | SKFDSDEEEEDTENVEAASSGK200000000000000000             | sp 075400 PR40A_HUMAN |
| 1501 | ASSLGEIDESSEL2000000000000000                        | sp Q8TF01 PNISR_HUMAN |
| 1502 | EGEETEGSEEDDKENDK20020000000000                      | sp Q16513 PKN2_HUMAN  |
| 1503 | GPSPSSPTPPAAAAPAEQAPR2.00002E+19                     | sp P49321 NASP_HUMAN  |
| 1504 | VEEDLKADEPSSEESDLEIDK220000000000                    | sp Q86VQ1 GLC11_HUMAN |
| 1505 | SPSSDLDTAEGDDFELLDQSELSQLDPASSR2.0002E+29            | sp P50502 F10A1_HUMAN |
| 1506 | TASPLPLRPDAPVEKSPEETATQVPSLESITLK2.0000000000002E+31 | sp Q8IZP2 ST134_HUMAN |
| 1507 | VSPSPQESLSSSK2000000000000000                        | sp Q86VR2 F134C_HUMAN |
| 1508 | ALSSGGSITSPPLSPALPK200000200000000000                | sp Q9HCK8 CHD8_HUMAN  |
| 1509 | SSDQPLTVPVSPK2000                                    | sp Q5JSH3 WDR44_HUMAN |
| 1510 | SSSPVTELASR220000000000                              | sp Q6Y7W6 PERQ2_HUMAN |
| 1511 | QPPPLAPQSPQGGVMGGSNSNQQQMR2E+19                      | sp Q9ULW0 TPX2_HUMAN  |
| 1512 | VVPGQFDDADSSDSEN2000000                              | sp Q9UQ35 SRRM2_HUMAN |
| 1513 | DFQDYMEPEEGCQSPQR10000000020000                      | sp P46937 YAP1_HUMAN  |
| 1514 | WVEENVSSVTDVALPALLDSDEER200000                       | sp Q9BRS2 RIOK1_HUMAN |
| 1515 | RGPNYTSGYGTNSELSNPSETESER200000000000                | sp 043237 DC1L2_HUMAN |
| 1516 | LGSSGLSASSIQA AVR200000000000                        | sp Q8NBN3 TM87A_HUMAN |
| 1517 | AFGESSTESDEEEEGCGHHCVR2.2202E+20                     | sp P51114 FXR1_HUMAN  |
| 1518 | YGLLANTEDPTEMASLDSDEETVFESR1020020000000000          | sp Q7Z6Z7 HUWE1_HUMAN |
| 1519 | EKPSFIDLETFNAGSDVGSSEYSEPFMGGAR20002000000000000000  | sp 060927 PP1RB_HUMAN |
| 1520 | SASPDDLGSNNWEAADLGNEER20000000000000                 | sp Q9BVV8 CS024_HUMAN |
| 1521 | SQLDDHPESDDEENFIDANDEDMEK200000000000000000          | sp Q9BRY0 S39A3_HUMAN |
| 1522 | EGSEFSFSDGEVAEK20020000000000                        | sp 000193 SMAP_HUMAN  |
| 1523 | LGSTSGEESDLER222000200000                            | sp Q03701 CEBPZ_HUMAN |
| 1524 | NSPSNLSSSDTG SVGGTYR2E+19                            | sp Q9BVS4 RIOK2_HUMAN |
| 1525 | MDRTPPPPTLSPA AITVGR1.0020000002E+19                 | sp Q9BW71 HIRP3_HUMAN |
| 1526 | KEESEESDDMGFLFD200200010000000                       | sp 043166 SI1L1_HUMAN |
| 1527 | ASTASPCNNNINAATAVALQEPR2.02E+21                      | sp Q8NDX5 PHC3_HUMAN  |
| 1528 | SYLEGSSDNQLKDESETPVDDR2.300002E+22                   | sp P05386 RLA1_HUMAN  |
| 1529 | TSPLVSQNEQGSTLR2000000000000000                      | sp P05387 RLA2_HUMAN  |
| 1530 | TNSPAYSDISDAGEDGEGK2.000002002E+19                   | sp Q71RC2 LARP4_HUMAN |
| 1531 | SSVSDAPVHITASGEPVPISEESELDQK2E+26                    | sp Q9UHI6 DDX20_HUMAN |
| 1532 | DELHIVEAEAMNYEGSPIK20000                             | sp Q15652 JHD2C_HUMAN |
| 1533 | EDKSPSEESAPTTSPESVSGSVSSGSSGR200000000000000000      | sp 015014 ZN609_HUMAN |
| 1534 | VISDESIGGSDVEFKPDTK2.020000002E+19                   | sp 014646 CHD1_HUMAN  |
| 1535 | LLSTDAEAVSTR200000000000                             | sp P06748 NPM_HUMAN   |
| 1536 | GDSETDLEALFNAVMNPK20000000000010000                  | sp P54725 RD23A_HUMAN |
| 1537 | SAGALEEGTSEGQLCGR200000000000000000                  | sp P52701 MSH6_HUMAN  |
| 1538 | SSTDSLPGISR2002000000000                             | sp Q15545 TAF7_HUMAN  |
| 1539 | AQLSPGIYDDTSAR200000000000                           | sp P46937 YAP1_HUMAN  |
|      |                                                      | sp Q8N2F6 ARM10_HUMAN |
|      |                                                      | sp Q9HCD5 NCOA5_HUMAN |
|      |                                                      | sp 075376 NCOR1_HUMAN |

|      |                                                    |                       |
|------|----------------------------------------------------|-----------------------|
| 1540 | GGSYSQAASSDSAQGSVDVSLTACK2000000000                | sp P01891 1A68_HUMAN  |
|      |                                                    | sp P10316 1A69_HUMAN  |
|      |                                                    | sp P05534 1A24_HUMAN  |
|      |                                                    | sp P30447 1A23_HUMAN  |
|      |                                                    | sp Q09160 1A80_HUMAN  |
|      |                                                    | sp P01892 1A02_HUMAN  |
| 1541 | MALPPQEDATASPPR20000                               | sp Q9UQ35 SRRM2_HUMAN |
| 1542 | HQSESQGVGLSDK200000002000                          | sp P38398 BRCA1_HUMAN |
| 1543 | DEEDGKDSDEAEDAELYDDLCPACDK2E+20                    | sp Q5F1R6 DJC21_HUMAN |
| 1544 | SPQPPVEEEDHFDDTVVCLDTYNCDLHFK2E+30                 | sp Q00839 HNRPU_HUMAN |
| 1545 | LPSTSGSEGVVFR200020000000                          | sp P29317 EPHA2_HUMAN |
| 1546 | ATLSSTSGLDLMSSEGEIISPQR20000                       | sp Q8WWI1 LMO7_HUMAN  |
| 1547 | THSTSSSLGSGESPFSSR200000000                        | sp Q9UGV2 NDRG3_HUMAN |
| 1548 | SLSDSESDSK200000000000                             | sp Q13185 CBX3_HUMAN  |
| 1549 | SPPLSPVGTTPVK2000200000000                         | sp Q9BVC5 ASHWN_HUMAN |
| 1550 | SGSALLQSQSSTEDPKDEPAELKPDSEDLSSQSSASK2E+27         | sp Q5VTR2 BRE1A_HUMAN |
| 1551 | RTSTPVIIMEGVQEETDTR2000000000000000                | sp Q8NFC6 BD1L1_HUMAN |
| 1552 | NVLSSLVAEADSEPESDGEAGIEAVGSAAEK3.0002E+25          | sp Q9UHR5 S30BP_HUMAN |
| 1553 | LIHGEDSDSEGEER20200000000                          | sp Q9C0C9 UBE20_HUMAN |
| 1554 | STSTPNVHMVSTTLPVDSR2000000000000000                | sp P04049 RAF1_HUMAN  |
| 1555 | KPPAPSPVQSQSPSTNWSAPVVKK202000000000000            | sp Q8IYB3 SRRM1_HUMAN |
| 1556 | SQDATFSPGSEQAESPGPIVSR200000000                    | sp Q86WB0 NIPA_HUMAN  |
| 1557 | SDVQEESESDTDDNKDSAAFEDNEVQDEFLEK2.00002E+27        | sp Q9UIG0 BAZ1B_HUMAN |
| 1558 | DSGNWDTSGSELSEGELEKR2202002000000000               | sp O75400 PR40A_HUMAN |
| 1559 | SPGVAAAEDGGLK2000000000000000                      | sp Q9BTE7 DCNL5_HUMAN |
| 1560 | SNTPESIAETPPAR2000000000000                        | sp Q9Y4H2 IRS2_HUMAN  |
| 1561 | SRSPLDKDTPPSASVVGASVGGHR23000000000000000          | sp Q96T37 RBM15_HUMAN |
| 1562 | ERSPALKSPLQSVVVR2000020000000000                   | sp Q9Y2W1 TR150_HUMAN |
| 1563 | THSTSSSLGSGESPFSSR2220020000000000                 | sp Q9UGV2 NDRG3_HUMAN |
| 1564 | GEEGSDDETENGPVK2000000000000000                    | sp Q6PD62 CTR9_HUMAN  |
| 1565 | SGDEEFKGEDELCDSGR200000000000000000                | sp O43823 AKAP8_HUMAN |
| 1566 | VSMPDVELNLKSPK1000000002000                        | sp Q09666 AHNK_HUMAN  |
| 1567 | DPSASPGDAGEQAIR2000000000000                       | sp P18206 VINC_HUMAN  |
| 1568 | QASLDGLQQLR20000000000                             | sp Q3MI16 TBC25_HUMAN |
| 1569 | EAEQAASEAAGDTPPGSSPSSLYEEPLGQPPR2.0000002E+28      | sp Q86TC9 MYPN_HUMAN  |
| 1570 | ALSSGGSITSPPLSPALPK200000020000000000              | sp Q6Y7W6 PERQ2_HUMAN |
| 1571 | ASVLDTSMSAGSGSPSK10000000200                       | sp Q9UPQ0 LIMC1_HUMAN |
| 1572 | SYLEGSSDNQLKDESTPVDDR3.00022E+21                   | sp Q9UHI6 DDX20_HUMAN |
| 1573 | GPLSPPTAGLEESSGQGPSSPVALLGQVQDFQQAECQPK2.00002E+27 | sp A1L390 PKHG3_HUMAN |
| 1574 | AAVLSDESEDEEKASAK2020000000000                     | sp Q96ST2 IWS1_HUMAN  |
| 1575 | KYSDSSLPPSNSGK2000000000000                        | sp Q68CP9 ARID2_HUMAN |
| 1576 | TAFDEAIAELDTLSEESYK2000000                         | sp P63104 1433Z_HUMAN |
| 1577 | KKASSDSEDSSEEEEEVQGPPAK2.22000022E+21              | sp Q14978 NOLC1_HUMAN |
| 1578 | GSVSPSTPSPPKPTGIFQTSANSSFEVVK2.0022E+27            | sp O15027 SC16A_HUMAN |
| 1579 | NASASFQLEDK200000000000                            | sp Q99543 DNJC2_HUMAN |
| 1580 | NTSSDNSDVEVMPAQSPR2002000010000000                 | sp Q9HCK8 CHD8_HUMAN  |
| 1581 | SFNGTDNHIR200000000000                             | sp Q5T0W9 FA83B_HUMAN |
| 1582 | IPNYQLSPTK20000                                    | sp O60934 NBN_HUMAN   |
| 1583 | SPSPEPIYNSEGK202000000000000                       | sp Q15637 SF01_HUMAN  |
| 1584 | AGMSSNQSISSPVLDVAVPR100000002000000000             | sp Q9UQ35 SRRM2_HUMAN |
| 1585 | LASTSDIEEK20000000                                 | sp O14974 MYPT1_HUMAN |
| 1586 | MHNLHGTPPPSEGSDEEEEEDEEDEEER2.002E+19              | sp Q9BQ67 GRWD1_HUMAN |
| 1587 | SSSMSSLTGAYTSGIPSSSR202000000000000000             | sp A8CG34 P121C_HUMAN |

|      |                                                         |           |             |
|------|---------------------------------------------------------|-----------|-------------|
| 1588 | LPPFPGLEPESEGAAGGSEPEAGDSDTEGEDIFTGAAVVK2. 00000002E+24 | sp Q13596 | SNX1_HUMAN  |
| 1589 | SSVAAPEKSSSNDVDEETAESDTSPVLEK2. 22E+22                  | sp Q99590 | SCAFB_HUMAN |
| 1590 | KPVNYSQFDHSDSDDDFVSATVPLNK2020000000000000              | sp Q96B01 | R51A1_HUMAN |
| 1591 | KRDSEEEFGSER2000002000                                  | sp Q12873 | CHD3_HUMAN  |
| 1592 | RPMEEDGEKSPSK200                                        | sp Q12906 | ILF3_HUMAN  |
| 1593 | ASSHSSQTQGGGSVTK2020000000000000                        | sp P02545 | LMNA_HUMAN  |
| 1594 | EMLMEDVGSEEEQEEDEAPFQEK2000000000000000                 | sp Q9H1E3 | NUCKS_HUMAN |
| 1595 | HTDDEMTGYVATR300000                                     | sp Q16539 | MK14_HUMAN  |
| 1596 | EHYPVSSPSSPPAQPGGVSR2002000000000000                    | sp 075179 | ANR17_HUMAN |
| 1597 | TLSADASVNTLPVVVSR2000000000000000                       | sp Q92615 | LAR4B_HUMAN |
| 1598 | NLATSADTPPSTVPGTGK2002000000000000                      | sp Q96Q15 | SMG1_HUMAN  |
| 1599 | SPEASASAPHTPR2000000000000000                           | sp Q8TF72 | SHRM3_HUMAN |
| 1600 | VSPSDTTPLVSR2000000000000000                            | sp Q9HCK8 | CHD8_HUMAN  |
| 1601 | HSSNPPLSHVGVMDSR2000000000000000                        | sp Q6PKG0 | LARP1_HUMAN |
| 1602 | SPGDFTSAAQLASTPFHK2000000000000000                      | sp 043683 | BUB1_HUMAN  |
| 1603 | ESESEDETTPAAPQLIK2020200000000000                       | sp 060832 | DKC1_HUMAN  |
| 1604 | VTFGEDLSPEVFDLPLANTPLR2000000000000000                  | sp Q69YH5 | CDCA2_HUMAN |
| 1605 | TSPADHGGVSGSESGSAVDSVAGEHSVSGR2000000000000000          | sp Q5T4S7 | UBR4_HUMAN  |
| 1606 | EGSEFSFDGEVAEK2020000000                                | sp Q9BVS4 | RIOK2_HUMAN |
| 1607 | QITQEEDDSDEEVAPENFFSLPEK2000000000000000                | sp Q92733 | PRCC_HUMAN  |
| 1608 | HGLQLGAQSPGR20000                                       | sp Q8N1G0 | ZN687_HUMAN |
| 1609 | GTGSGGQLQDLDCSSDDEGAAQNSTKPSATK2. 2E+19                 | sp P08240 | SRPR_HUMAN  |
| 1610 | SSPVNNHSPGQTPTLGGPEAR2000000000000000                   | sp Q5SW79 | CE170_HUMAN |
| 1611 | GLLSNHTGSPR2000                                         | sp Q96L14 | C170L_HUMAN |
| 1612 | SASQSSLDKLDQELK220000000000                             | sp Q13111 | CAF1A_HUMAN |
| 1613 | SASQSSLDKLDQELK220000000000                             | sp 060271 | JIP4_HUMAN  |
| 1614 | DTSENADGQSDENKDDYTIPDEYR2E+22                           | sp P43243 | MATR3_HUMAN |
| 1615 | SPATSPISSNSHR20002000000000                             | sp Q9NR09 | BIRC6_HUMAN |
| 1616 | DNLLDTYSADQGDSSSEGGTLAR2000000000                       | sp Q6ZRP7 | QSOX2_HUMAN |
| 1617 | SPVGKSPSTGTYGSSQK2000000000000000                       | sp Q9Y2W1 | TR150_HUMAN |
| 1618 | GYSPYSVSGSGSTAGSR300000020000000000                     | sp Q15149 | PLEC_HUMAN  |
| 1619 | LASPSGSTSSGLEVVAPEGTSAPGGGPGTLDDSATICR2. 2E+30          | sp Q13263 | TIF1B_HUMAN |
| 1620 | QSPASPPPLGGAPVR2000000000000000                         | sp Q14160 | SCRIB_HUMAN |
| 1621 | DLFSLDSEDSPASPPLR200000                                 | sp Q9BTK6 | PAGR1_HUMAN |
| 1622 | GNDSGEGESDDPEK2000000000000000                          | sp 075351 | VPS4B_HUMAN |
| 1623 | EDVTPPLSPDDLK200020000000                               | sp Q9Y4B5 | MTCL1_HUMAN |
| 1624 | QVQSLTCEVDALK200000000000                               | sp P08670 | VIME_HUMAN  |
| 1625 | YLVDGTKPNAGSEEISSEDELVEEK2000220000000000               | sp Q9NY61 | AATF_HUMAN  |
| 1626 | DIEISTEEKDTGDLK2200000000000000                         | sp Q4G0J3 | LARP7_HUMAN |
| 1627 | GDAASSPAPAASVGSQGGAR2000000000000000                    | sp Q8WVB6 | CTF18_HUMAN |
| 1628 | DELHIVEAEAMNYEGSPIK1000020000                           | sp P06748 | NPM_HUMAN   |
| 1629 | LPLVPESPR2000                                           | sp Q86WB0 | NIPA_HUMAN  |
| 1630 | SRSDIDVNAASAK2000000000000000                           | sp Q7Z460 | CLAP1_HUMAN |
| 1631 | AESISEEADSEPGR200002000000                              | sp Q9NSI6 | BRWD1_HUMAN |
| 1632 | LEPVSPSPPHTDPELELVPPR20020000000000000000               | sp Q9Y618 | NCOR2_HUMAN |
| 1633 | STSAPQMSPGSSDNQSSSPQPAQQK1. 2E+19                       | sp Q14157 | UBP2L_HUMAN |
| 1634 | SSPKEELHPAAPSQ LAPSFSSSSSSSSGPR2E+29                    | sp 043166 | SIIL1_HUMAN |
| 1635 | SGSAAQAEGLCK200000000000                                | sp Q92685 | ALG3_HUMAN  |
| 1636 | SESELIDELSEDFDR2000000000000000                         | sp P20810 | ICAL_HUMAN  |
| 1637 | YLVDGTKPNAGSEEISSEDELVEEK220000000000                   | sp Q9NY61 | AATF_HUMAN  |

|      |                                                                       |    |         |             |
|------|-----------------------------------------------------------------------|----|---------|-------------|
|      |                                                                       | sp | P05534  | 1A24_HUMAN  |
|      |                                                                       | sp | P30447  | 1A23_HUMAN  |
| 1637 | KGGSYSQAASSDSAQGSVSLTACKV200020000000000                              | sp | P01891  | 1A68_HUMAN  |
|      |                                                                       | sp | P01892  | 1A02_HUMAN  |
|      |                                                                       | sp | Q09160  | 1A80_HUMAN  |
|      |                                                                       | sp | P10316  | 1A69_HUMAN  |
| 1638 | KEESEESDDDMGFGLFD200000000000                                         | sp | P05387  | RLA2_HUMAN  |
|      |                                                                       | sp | P05386  | RLA1_HUMAN  |
| 1639 | SPHSPPIATPPSQSSSCSDAPMLSTVHSAK2.0222E+19                              | sp | Q9NYF8  | BCLF1_HUMAN |
| 1640 | SSSVGSSSSYPISPAISR200                                                 | sp | Q15149  | PLEC_HUMAN  |
| 1641 | HGSGADSDYENTQSGDPLLGLEGK2.0002E+22                                    | sp | Q9Y2X7  | GIT1_HUMAN  |
| 1642 | ASQGLLSSIENSESDSSEAK2020000000                                        | sp | Q5UIP0  | RIF1_HUMAN  |
| 1643 | KQSGSPTLDTAPNGR20200000000000                                         | sp | Q9H2J7  | S6A15_HUMAN |
| 1644 | DYDEEEQGYDSEKEK200000                                                 | sp | Q05519  | SRS11_HUMAN |
| 1645 | SPVSGGAPQAAAPAPAAHVAGNPGGDAAPAATGTAAAASLATAAGSEDAEK200000000000000000 | sp | P16989  | YBOX3_HUMAN |
| 1646 | GIPLATGDTSPPELLPGAPLPPPK200000000000000000                            | sp | Q075821 | EIF3G_HUMAN |
| 1647 | SLSPGKENVSALDMEK200000000000000000                                    | sp | Q9H307  | PININ_HUMAN |
| 1648 | SIHEVDISNLEAALR200000000000000000                                     | sp | Q9Y2H5  | PKHA6_HUMAN |
| 1649 | SELGNQSPSTSSR20000000                                                 | sp | Q5JTV8  | TOIP1_HUMAN |
| 1650 | EAEGEDDRDSANGEDDS200000000                                            | sp | P07910  | HNRPC_HUMAN |
| 1651 | LLDESESAASSR2002000                                                   | sp | Q8N108  | MIER1_HUMAN |
| 1652 | ASPAGTAGGPGAGAAAGGTGPLAAR2E+20                                        | sp | Q12962  | TAF10_HUMAN |
| 1653 | KEESEESDDDMGFGLFD2000000000000000                                     | sp | P05386  | RLA1_HUMAN  |
|      |                                                                       | sp | P05387  | RLA2_HUMAN  |
| 1654 | EVSDSEAGGPGQGER2000000000000000                                       | sp | Q9BW71  | HIRP3_HUMAN |
| 1655 | TASGSSVTSLDGTR20220000000000                                          | sp | Q92597  | NDRG1_HUMAN |
| 1656 | DKSDSDEGLLFSR20200000000000                                           | sp | Q9H4G0  | E41L1_HUMAN |
| 1657 | NTSSDNSDEVMPAQSPR2002000010002000                                     | sp | Q9HCK8  | CHD8_HUMAN  |
| 1658 | QASPTVVVER200000000                                                   | sp | Q8TB72  | PUM2_HUMAN  |
| 1659 | SRSPTPPSSAGLGSNSAPPIDSR2.0022E+20                                     | sp | Q8IWX8  | CHERP_HUMAN |
| 1660 | DSGNWDTSGSELSEGELEK20020020000000                                     | sp | Q075400 | PR40A_HUMAN |
| 1661 | FTSQDASTPASSELNK2000020000000000                                      | sp | Q9HAW4  | CLSPN_HUMAN |
| 1662 | TTPNSGDVQVTEDAVR2000000000000000                                      | sp | P35269  | T2FA_HUMAN  |
| 1663 | ENSPSSQSAGLSSINK20000000000000                                        | sp | Q9H2Y7  | ZN106_HUMAN |
| 1664 | KLPPPPQAPPEEENESEPEEPPSGVEGAQSR200000000000000000                     | sp | Q060341 | KDM1A_HUMAN |
| 1665 | YMLTHQELASDGEIETK200000000                                            | sp | Q02241  | KIF23_HUMAN |
| 1666 | ESEDKPEIEDVGSDEEEKK200000000                                          | sp | P07900  | HS90A_HUMAN |
| 1667 | LFEDDSNEKLFDEEEDSSEK2000000000002000                                  | sp | Q043719 | HTSF1_HUMAN |
| 1668 | ELEKPIQSKPQSPVIQAAVSPK200000000000002000                              | sp | Q9Y6D5  | BIG2_HUMAN  |
| 1669 | STLTSSYNCPSPYADGR20000000                                             | sp | Q9HCU4  | CEL2R_HUMAN |
| 1670 | ENYDSEEEEDDDVASSR3002000000000000                                     | sp | Q9Y2U8  | MAN1_HUMAN  |
| 1671 | LLPEGEETLESDEK200000                                                  | sp | Q8N6N3  | CA052_HUMAN |
| 1672 | ASLGSLEGEAEAEASSPK200200000000000000                                  | sp | Q09666  | AHNK_HUMAN  |
| 1673 | CAPSAGSPAAVGR200000000                                                | sp | Q7L2J0  | MEPCE_HUMAN |
|      |                                                                       | sp | P51812  | KS6A3_HUMAN |
| 1674 | AYSFCGTVEYMAPEVVNR2000000000000000                                    | sp | Q9UK32  | KS6A6_HUMAN |
|      |                                                                       | sp | Q15418  | KS6A1_HUMAN |
| 1675 | KVPVQEIDDDFFPSSGEEAEASVGEAGGGGR2.2E+19                                | sp | Q03468  | ERCC6_HUMAN |
| 1676 | LHQLSGSDQLESTAHSR20200000000000                                       | sp | Q060271 | JIP4_HUMAN  |
|      |                                                                       | sp | P07355  | ANXA2_HUMAN |
| 1677 | LSLEGDHSTPPSAYGSVK200000000000000000                                  | sp | Q6NMY6  | AXA2L_HUMAN |
|      |                                                                       | sp | P52948  | NUP98_HUMAN |
| 1678 | DSENLASPSEYPENGER200000000000                                         |    |         |             |
| 1679 | LPSGGAASPTGSAVDIR2000000000000000                                     | sp | Q09666  | AHNK_HUMAN  |

|      |                                                        |                       |
|------|--------------------------------------------------------|-----------------------|
| 1680 | SEPVKEESSELEQPFAQDTSSVGPDR2000000                      | sp Q15424 SAFB1_HUMAN |
|      |                                                        | sp Q14151 SAFB2_HUMAN |
| 1681 | QICLVMLETLSQSPQGR200000                                | sp Q15365 PCBP1_HUMAN |
| 1682 | YSGAYGASVSDEELK200000000000000                         | sp Q9NX63 MIC19_HUMAN |
| 1683 | GPTSSPCEEEGDEGEEDR220000000000000                      | sp Q86VM9 ZCH18_HUMAN |
| 1684 | GPTSSPCEEEGDEGEEDR200000000000000                      | sp Q86VM9 ZCH18_HUMAN |
| 1685 | AGSSTPGDAPPAVAEVQGR200000000000000                     | sp Q7Z6Z7 HUWE1_HUMAN |
| 1686 | GARPPAAGPGGDEDEDEEDTAPESALDTSLDK20002000220000         | sp Q27J81 INF2_HUMAN  |
| 1687 | VVPGQFDDADSSDSEN2000000                                | sp Q9BRS2 RIOK1_HUMAN |
| 1688 | LKNDSLFLGLGLEEAGPKESSEEGK2200000                       | sp Q3YEC7 RABL6_HUMAN |
| 1689 | TLDAEVVEKPAK200000000000000                            | sp Q9H3P2 NELFA_HUMAN |
| 1690 | KMSQPGSPSPK2000200000                                  | sp Q14839 CHD4_HUMAN  |
| 1691 | GRESDEDEDASETDLAK2000200020000000                      | sp Q9H7L9 SDS3_HUMAN  |
| 1692 | METVSNASSSSNPSSPGR1000000000000020000                  | sp Q9NTI5 PDS5B_HUMAN |
| 1693 | METEADAPSPAPSLGER2000200000                            | sp Q12873 CHD3_HUMAN  |
|      |                                                        | sp Q71U36 TBA1A_HUMAN |
|      |                                                        | sp P68363 TBA1B_HUMAN |
| 1694 | TIGGGDDSFNTFFSETGAGK200000000000000                    | sp Q6PEY2 TBA3E_HUMAN |
|      |                                                        | sp Q13748 TBA3C_HUMAN |
|      |                                                        | sp Q9BQE3 TBA1C_HUMAN |
| 1695 | HGSGADSDYENTQSGDPLLGLGK2000000000000000000             | sp Q9Y2X7 GIT1_HUMAN  |
| 1696 | DNSPEPNDPEEPQEVSSTPSDK2E+20                            | sp Q9HB58 SP110_HUMAN |
| 1697 | SDSSGGYNLSDI IQSPSSTGLLK2E+21                          | sp Q9P2D0 IBTK_HUMAN  |
| 1698 | AALGLQSDDEDAAVDIDEQIESMFNSK2E+21                       | sp Q7L014 DDX46_HUMAN |
| 1699 | SLESSVIMDR2000000000                                   | sp Q9H2Y7 ZN106_HUMAN |
| 1700 | DTQSPSTCSEGLLGWSQK2000000000000000000                  | sp Q9C0C2 TB182_HUMAN |
| 1701 | SNTPESIAETPPAR2020000000000000                         | sp Q9Y4H2 IRS2_HUMAN  |
| 1702 | SQSLPTLLSPVR200000000000000                            | sp P28290 SSFA2_HUMAN |
| 1703 | DSGNWDTSGSELSEGELEK220200200000000                     | sp O75400 PR40A_HUMAN |
| 1704 | YSPSQNSPIHHIPSR30000020000000000                       | sp Q9NYF8 BCLF1_HUMAN |
| 1705 | YMAENPTAGVVQEEEEEDNLEYDSGNPIAPTK1E+31                  | sp Q86XP3 DDX42_HUMAN |
| 1706 | GQSTDSLPQTICR2000000000                                | sp Q96NE9 FRMD6_HUMAN |
| 1707 | DRPGSPESPLLDAPFSR2002000000000000                      | sp Q8TF72 SHRM3_HUMAN |
| 1708 | HGLAHDEMKSPPR2000                                      | sp Q9Y2W1 TR150_HUMAN |
| 1709 | VPPAPVPCPPSPGSAVPSSPK2000000002000                     | sp O95817 BAG3_HUMAN  |
| 1710 | EMEHNTVCAAGTSPVGEIGEEK20000000000                      | sp P18583 SON_HUMAN   |
| 1711 | NHSPSPPTPTGAAPSLASPK2. 020002E+19                      | sp Q5SYE7 NHSL1_HUMAN |
| 1712 | AESSSSISSASLSAANTPTVGVSR2. 202E+21                     | sp Q0JRZ9 FCHO2_HUMAN |
| 1713 | HASSPESPKPAPAPGSHR2200000000000000000                  | sp Q9UQ35 SRRM2_HUMAN |
| 1714 | AGSSTPGDAPPAVAEVQGR2000000000000000000                 | sp Q7Z6Z7 HUWE1_HUMAN |
| 1715 | AASLTEDR2000000                                        | sp Q04637 IF4G1_HUMAN |
| 1716 | YTPTSPSYSPSSPEYTPTSPK32000000000000000                 | sp P24928 RPB1_HUMAN  |
| 1717 | SATVKPGAVGAGEFVSPCESGDNTGEPALAEQR2. 0002E+19           | sp Q12888 TP53B_HUMAN |
| 1718 | LHNENAEMSDSSSSGTETDLHGSLR22220000000000000             | sp Q9H832 UBE2Z_HUMAN |
| 1719 | QGLAETASPVAVSLR2000000000                              | sp Q15154 PCM1_HUMAN  |
| 1720 | NASASFQLEDK20200000000                                 | sp Q99543 DNJC2_HUMAN |
| 1721 | RKSEDGTPAEDGTPAATGGSQPPSMGR2E+25                       | sp Q9BQG0 MBB1A_HUMAN |
| 1722 | EGMNPYSYDEYADSDQHDAYLER200000000000000                 | sp Q08945 SSRP1_HUMAN |
| 1723 | SGSSSPDSEITELKFPSINH2. 22E+19                          | sp P17812 PYRG1_HUMAN |
| 1724 | ALSGTSPDDVQPGPSVGPSPK2000000000000000000               | sp Q9Y314 NOSIP_HUMAN |
| 1725 | SVVSDLEADDVK200000000000000                            | sp P11388 TOP2A_HUMAN |
| 1726 | LDDAHSLSGSGAGEGYEPISSDELDEILAGDAEK2. 0020000000002E+28 | sp Q5T200 ZC3HD_HUMAN |
| 1727 | KPTAGQTSATAVSDDDIQTISSGSEGDDFEDKK2. 0000202202E+20     | sp Q15047 SETB1_HUMAN |

|      |                                                      |                       |
|------|------------------------------------------------------|-----------------------|
| 1728 | DLGHPVEEEDELESGDQEDEDDESEDPGKDL DHI2E+21             | sp 060763 USO1_HUMAN  |
| 1729 | SSDEENGPSSPDLDR22000000002000000                     | sp Q96B36 AKTS1_HUMAN |
| 1730 | EVSSRPSTPGLSVVSGISATSEDI PNK2. 2E+25                 | sp Q14C86 GAPD1_HUMAN |
| 1731 | QGSITSPQANEQSVTPQR20000                              | sp Q9UQ35 SRRM2_HUMAN |
| 1732 | DSALQDTDDSDDDPVLIPGAR2002000000000000                | sp Q58WW2 DCAF6_HUMAN |
| 1733 | HSTPSNSSNPSGPPSPNSPHR20020000                        | sp Q9Y5S2 MRCKB_HUMAN |
| 1734 | GIPLATGDTSPPELLPGAPLPPPK2. 0002E+20                  | sp 075821 EIF3G_HUMAN |
| 1735 | GTSDSSSGNVSEGESPPDSQEDSFQGR2E+23                     | sp Q8WUB8 PHF10_HUMAN |
| 1736 | DKEVSDDEAEK200000000                                 | sp P07900 HS90A_HUMAN |
| 1737 | NDSGEENVPLDLTR2000000000000                          | sp Q6R327 RICTR_HUMAN |
| 1738 | LSSTDDGYIDLQFK22000000000000                         | sp Q96A57 TM230_HUMAN |
| 1739 | SIEVENDFLPVEK20000000000000                          | sp Q96B97 SH3K1_HUMAN |
| 1740 | DDDTASVTLNSSATGR22000000000                          | sp P21675 TAF1_HUMAN  |
| 1741 | VSLEPHQGGPTPEK200000                                 | sp Q14980 NUMA1_HUMAN |
| 1742 | GLGSSPDLELLLR200000000000                            | sp Q9NQQ7 S35C2_HUMAN |
| 1743 | LSPTSMQDGLDLPSETDLR2100000000000000                  | sp Q9UK58 CCNL1_HUMAN |
| 1744 | RGSSGSVDETLFALPAASEPVIR2. 02E+20                     | sp Q9NQC3 RTN4_HUMAN  |
| 1745 | HIISATSLSTSPTELGSR200000000                          | sp Q5JSZ5 PRC2B_HUMAN |
| 1746 | LFDEEEDSSEKLFDDSDER200000020000                      | sp 043719 HTSF1_HUMAN |
| 1747 | SQSDLDDQHDYDSVASDETDQEPLR30000200000000000           | sp Q9Y2X7 GIT1_HUMAN  |
| 1748 | TPKDSPGIPPSANAHQLFR2. 0002E+19                       | sp P51812 KS6A3_HUMAN |
| 1749 | SLESSVIMDR2002000000                                 | sp Q9H2Y7 ZN106_HUMAN |
| 1750 | VPDEEENEESDNEKETEK2000000000                         | sp P11388 TOP2A_HUMAN |
| 1751 | DITDPLSLNTCTDEGHVVLASPLK20000                        | sp Q7L2J0 MEPCE_HUMAN |
| 1752 | TSSGTSLSAMHSSGSSGK2200000000000000                   | sp Q12888 TP53B_HUMAN |
| 1753 | VIGQDHDFSESSEEEAPAEASSGALR2022000000000000000        | sp P23497 SP100_HUMAN |
| 1754 | SPSLSLAPLSR2000000002000                             | sp Q969H4 CNKR1_HUMAN |
| 1755 | KGSDDAPYSPTAR200000000000                            | sp 075151 PHF2_HUMAN  |
| 1756 | ESYTEEIVSEAESHVSGISR2000200200000                    | sp Q5QJE6 TDIF2_HUMAN |
| 1757 | EEETSIDVAGKPNEVTK20000000000000                      | sp P53985 MOT1_HUMAN  |
| 1758 | EYDSGDTDEIIAMK200200000100                           | sp Q76FK4 NOL8_HUMAN  |
| 1759 | SEDEDSLEEAGSPAPGPCPR2. 00002000002E+20               | sp Q8TBB5 KLDC4_HUMAN |
| 1760 | EAANEAGDSSQDEAEDDVK220000000000                      | sp Q9NVU0 RPC5_HUMAN  |
| 1761 | TSDANETEDHLESLICK20000000000000000                   | sp Q09161 NCBP1_HUMAN |
| 1762 | MDRTPPPPTLSPAAITVGR20000002000000000                 | sp Q8NDX5 PHC3_HUMAN  |
| 1763 | DAPGEDEEEDGVSEAASLEPK20002000000                     | sp Q9H0E9 BRD8_HUMAN  |
| 1764 | LDSSEMDSHSENYDTMSSPLPGK2. 010020000001E+20           | sp Q9NTI5 PDS5B_HUMAN |
| 1765 | KPVTVSPTTPTSPTEGEAS200000000                         | sp Q9Y6G9 DC1L1_HUMAN |
| 1766 | EATNTTSEPSAPSQDLLDLSPSPR2000                         | sp 075674 TM1L1_HUMAN |
| 1767 | NENTEGSPQEDGVELEGLK20000000000000000                 | sp P11388 TOP2A_HUMAN |
| 1768 | GSLAEAVGSPPPAATPTPTPTR20000000000000000              | sp Q9Y6I3 EPN1_HUMAN  |
| 1769 | GADNDGSGSESGYTTPK202000000000                        | sp Q7Z417 NUFP2_HUMAN |
| 1770 | ASLGSLEGEAEAEASSPK2000                               | sp Q09666 AHNK_HUMAN  |
| 1771 | SPGMLEPLGSSR20000000000000                           | sp Q9UQ35 SRRM2_HUMAN |
| 1772 | STSQGSINSPVYSR20000000000000                         | sp 014639 ABLM1_HUMAN |
| 1773 | AGSISTLDSLDFAR20000000000000                         | sp Q9P260 K1468_HUMAN |
| 1774 | VTDALPEPEPPGAMAASEDEEEEEEALEAMQSR2000000000000000000 | sp Q9Y3E7 CHMP3_HUMAN |
| 1775 | SLSPQEDALTGSR20200000000000                          | sp Q96EN8 MOCOS_HUMAN |
| 1776 | KLSSSSEPYEDEFNDDQSIK2000300000000000000              | sp Q9H4L7 SMRCD_HUMAN |
| 1777 | ADEPSSEESDLEIDK20020000000                           | sp P50502 F10A1_HUMAN |
| 1778 | SPHSPSPATPPSQSSSCSDAPMLSTVHSAK2. 00202E+31           | sp Q8IZP2 ST134_HUMAN |
| 1779 | ESLKEEDESDDNM2000010                                 | sp Q9NYF8 BCLF1_HUMAN |
| 1780 | SIPQLDLGWPDTIAYR20000000000000000                    | sp P25788 PSA3_HUMAN  |
|      |                                                      | sp A6ND36 FA83G_HUMAN |

|      |                                                    |                       |
|------|----------------------------------------------------|-----------------------|
| 1781 | LTPVSPESSTEEK2000000000                            | sp Q13501 SQSTM_HUMAN |
| 1782 | VSALEEDMDDVESSEEEEEDEKLER1.000022E+19              | sp Q8NAV1 PR38A_HUMAN |
| 1783 | KPGPPLSPEIR200000                                  | sp Q96JM3 CHAP1_HUMAN |
| 1784 | AGLSPERPPK20000000                                 | sp Q9H6F5 CCD86_HUMAN |
| 1785 | QICVVMLETLSQSPPK20000                              | sp Q15366 PCBP2_HUMAN |
| 1786 | LTVSDGESGEEKK20002000000                           | sp P46100 ATRX_HUMAN  |
| 1787 | VDGETASDESER2000000                                | sp O95674 CDS2_HUMAN  |
| 1788 | YGPADVEDTTGSGATDSKDDDDIDLFGSDDEEESEEAK200000000000 | sp P24534 EF1B_HUMAN  |
| 1789 | TASISSPSEGTPTVGSYGCTPQSLPK2.022E+25                | sp Q6PKG0 LARP1_HUMAN |
| 1790 | SSSPVTELASR2000000000                              | sp Q9UQ35 SRRM2_HUMAN |
| 1791 | SIGSAVDQGNESIVAK200200000000000000                 | sp Q9H0H5 RGAP1_HUMAN |
| 1792 | GLRDSHSSEDEASSQTDLSQTISK20000000000000000000       | sp Q5JTV8 TOIP1_HUMAN |
| 1793 | SVCGHLENTSVGNPNPSSAENSFR200020000000000000         | sp Q96HH9 GRAM3_HUMAN |
| 1794 | GSSAAASPGSPPPGR2000000                             | sp Q86UX6 ST32C_HUMAN |
| 1795 | RKPSPEPEGEVGPVK2000000000000000                    | sp Q7Z5L9 I2BP2_HUMAN |
| 1796 | THSTSSSLGSGESPFGR2000000000000000                  | sp Q9UGV2 NDRG3_HUMAN |
| 1797 | ATSSSSGSLSATGR20000000000                          | sp Q03252 LMNB2_HUMAN |
| 1798 | SSVSDAPVHITASGEPVPISEESELDQK2E+28                  | sp O14646 CHD1_HUMAN  |
| 1799 | SSTPGSPTHVSSGSNASR2000000000000000                 | sp Q14CZ0 CP072_HUMAN |
| 1800 | TISPSTSNIPLMR20020000000000                        | sp O94806 KPCD3_HUMAN |
| 1801 | SPAGSPDEEGGAEAPAAGIR20000000000000000000           | sp Q15139 KPCD1_HUMAN |
| 1802 | AVTIANSKPKSEK2000000000                            | sp O15061 SYNEM_HUMAN |
| 1803 | NLEHLSSFSDDEDDPGYSQDAYK20002000000000000000        | sp Q8NEF9 SRFB1_HUMAN |
| 1804 | KTSSDDESEEDDLLQR20000200000000000000               | sp Q2KHR3 QSER1_HUMAN |
| 1805 | AGSPLCNSNLQDSEEDIEPSYSLFR20000200000000000000      | sp Q9Y5J1 UTP18_HUMAN |
| 1806 | TLSDESIYNSQR20200000000000                         | sp Q9NRY4 RHG35_HUMAN |
| 1807 | RKSLDSESDDSK202000000000                           | sp O43166 SI1L1_HUMAN |
| 1808 | SPCETISSPSTLESK200000000000000000                  | sp Q13185 CBX3_HUMAN  |
| 1809 | GPPDFSSDEEREPTPVLGSGAAAAGR2000000000000000         | sp Q9COD5 TANC1_HUMAN |
| 1810 | KDSEEEVSLGSDIEEGNHQVEDGCR2E+25                     | sp P42166 LAP2A_HUMAN |
| 1811 | TDEVPAGGRSEAEDDEDYVPYVPLR2.02E+20                  | sp P42167 LAP2B_HUMAN |
| 1812 | VTETEDSDSDSDDEDDVHVTIGDIK2.020002E+26              | sp Q9Y487 VPP2_HUMAN  |
| 1813 | GGDDHDDTSDSDGLTLK22020000000000                    | sp Q9UJV9 DDX41_HUMAN |
| 1814 | QPLSEASNQQPLSGEEK2000000                           | sp Q6UN15 FIP1_HUMAN  |
| 1815 | CEERSPSFGEDYYGPSR2020000000000000                  | sp Q9BTC0 DIDO1_HUMAN |
| 1816 | SPLSDYMNLDSSPK200000000000000000                   | sp Q9NQW6 ANLN_HUMAN  |
| 1817 | KGSITEYTAAEEK20000000000000                        | sp P49761 CLK3_HUMAN  |
| 1818 | VGSPLDYSLVLPSTNGQSPGK2E+20                         | sp Q9Y4H2 IRS2_HUMAN  |
| 1819 | TAVQYIESSDSEIETSELPQK2020000000000000              | sp Q12982 BNIP2_HUMAN |
| 1820 | HIVSNDSSDSDDESHEPK2000000000                       | sp Q96T23 RSF1_HUMAN  |
| 1821 | KGGYSQAASSDSAQGSVSLTACK2000000000                  | sp Q14527 HLTF_HUMAN  |
| 1822 | QICLVMLETLSQSPQGR1000000200000                     | sp P47712 PA24A_HUMAN |
| 1823 | GPPDFSSDEEREPTPVLGSGAAAAGR2E+21                    | sp P05534 1A24_HUMAN  |
| 1824 | DSTSQHDDDNISTTSGFSSR20000000000000000000           | sp Q09160 1A80_HUMAN  |
| 1825 | RDSSESQLASTESDKPTTGR20000000000000000000           | sp P30447 1A23_HUMAN  |
| 1826 | DQPPFGSDSDSVEADK2002000000                         | sp P01891 1A68_HUMAN  |
|      |                                                    | sp P01892 1A02_HUMAN  |
|      |                                                    | sp P10316 1A69_HUMAN  |
|      |                                                    | sp Q15365 PCBP1_HUMAN |
|      |                                                    | sp P42166 LAP2A_HUMAN |
|      |                                                    | sp P42167 LAP2B_HUMAN |
|      |                                                    | sp P49790 NU153_HUMAN |
|      |                                                    | sp Q96B23 CRO25_HUMAN |
|      |                                                    | sp Q14676 MDC1_HUMAN  |

|      |                                               |                       |
|------|-----------------------------------------------|-----------------------|
| 1827 | STSAPQMSPGSSDNQSSSPQPAQQK2E+23                | sp Q14157 UBP2L_HUMAN |
| 1828 | QGLAETASPVAVSLR200002000                      | sp Q15154 PCM1_HUMAN  |
| 1829 | AGEPDGESLDEQPSSSSSK200000000000               | sp Q9H3Q1 BORG4_HUMAN |
| 1830 | INPDNYGMDLNSDDSTDDEAHPR2002200000000          | sp Q9NQS7 INCE_HUMAN  |
| 1831 | TDGFAEAIHSPQVAGVPR2000000000                  | sp P12270 TPR_HUMAN   |
| 1832 | TCNSPQNSTDSVSDIVPDSPPFGALGSDTR2.02E+22        | sp Q14694 UBP10_HUMAN |
| 1833 | TPTAPAVNLAGAR20000000000000                   | sp Q9UQ35 SRRM2_HUMAN |
| 1834 | NSSDSAIDNPKPNK2020000000000                   | sp P46100 ATRX_HUMAN  |
| 1835 | LDQPVSAPPSPR2000                              | sp Q16204 CCDC6_HUMAN |
| 1836 | SHSLSQHTATSSK200000000000                     | sp P49790 NU153_HUMAN |
| 1837 | GVMAVTAVTATAASDR10000000002000                | sp Q7Z4V5 HDGR2_HUMAN |
| 1838 | SSSLGSTPHEELER22000000000000                  | sp Q9NRA8 4ET_HUMAN   |
| 1839 | ASDPQSPPQVSR20000000                          | sp Q7L7X3 TAOK1_HUMAN |
| 1840 | DSGNWDTSGSELSEGELEK2000020000000              | sp 075400 PR40A_HUMAN |
| 1841 | HASSSPESPKPAPAPGSHR2020000000000000           | sp Q9UQ35 SRRM2_HUMAN |
| 1842 | QSPGPALAR200000000                            | sp P85037 FOKK1_HUMAN |
| 1843 | GDPDSEADSIDSDQEDPLK2000200200000000           | sp Q9H9L4 KANL2_HUMAN |
| 1844 | DSDQVAQSDGEESPAEEQLLGEHIK2.00002E+19          | sp 094979 SC31A_HUMAN |
| 1845 | HTGMASIDSSAPETTSOSSPTLSR20000000              | sp A7E2V4 ZSWM8_HUMAN |
| 1846 | SYLEGSSDNQLKDESETPVDDR2.30002E+22             | sp Q9UHI6 DDX20_HUMAN |
| 1847 | KSVSSPTSSNTPPTK2000000000000000               | sp Q5M775 CYTSB_HUMAN |
| 1848 | SPDPFGAVAAQK2000000000000                     | sp Q9Y3Q8 T22D4_HUMAN |
| 1849 | AEEPPSQLDQDTQVQDMDEGSDEEEGQK2000000000        | sp Q15459 SF3A1_HUMAN |
| 1850 | LPSTSGSEGVPR200000000000                      | sp P29317 EPA2_HUMAN  |
| 1851 | SGSSQELDVKPSASPQER2000000000200000            | sp Q9UQ35 SRRM2_HUMAN |
| 1852 | SPALKSPLQSVVVR2000020000000000                | sp Q9Y2W1 TR150_HUMAN |
| 1853 | SSTPLPTISSAENTR2000000000000000               | sp P42167 LAP2B_HUMAN |
| 1854 | KPEKPLFSSASPQDSSPR200000000                   | sp P42166 LAP2A_HUMAN |
| 1855 | SSLSGDEEDELFK20020000000000                   | sp 000712 NFIB_HUMAN  |
| 1856 | ASSVSTKESPAR20000                             | sp Q5T1M5 FKB15_HUMAN |
| 1857 | LASPELER2000000                               | sp Q13428 TCOF_HUMAN  |
|      |                                               | sp P05412 JUN_HUMAN   |
|      |                                               | sp P17535 JUND_HUMAN  |
|      |                                               | sp 015320 CTGE5_HUMAN |
|      |                                               | sp P0CG41 CTGE8_HUMAN |
|      |                                               | sp Q8IX94 CTGE4_HUMAN |
| 1858 | SNSELEDEILCLEK2020000000000000                | sp A4FU28 CTGE9_HUMAN |
|      |                                               | sp A4D2H0 CTGEF_HUMAN |
|      |                                               | sp Q86UF2 CTGE6_HUMAN |
| 1859 | DLHQGIEAASDEEDLR20000000                      | sp Q9UKS6 PACN3_HUMAN |
| 1860 | EGITGPPADSSKPIGPDDAIDALSSDFTCGSPTAAGK20000000 | sp P20810 ICAL_HUMAN  |
| 1861 | TTSPSSDTLLDR200200000000                      | sp Q96QT6 PHF12_HUMAN |
| 1862 | SYLEGSSDNQLKDESETPVDDR2.00002E+22             | sp Q9UHI6 DDX20_HUMAN |
| 1863 | LGGLRPESPELTSVSR20000000000                   | sp Q9H6F5 CCD86_HUMAN |
| 1864 | IDDRSDEEGASDR2000000000                       | sp Q8TDD1 DDX54_HUMAN |
| 1865 | ENPPVEDSDEDDKR20000000                        | sp Q8TCJ2 STT3B_HUMAN |
| 1866 | WDGSEEDENSK2000000000                         | sp 060841 IF2P_HUMAN  |
| 1867 | EHNSMWSLSSPDAAEVEPDFSSIERS2000000000000000    | sp Q27J81 INF2_HUMAN  |
| 1868 | SSSMSSLTGAYTSGIPSSSR2200000000000000          | sp A8CG34 P121C_HUMAN |
| 1869 | YNLDASEEEDSNK200000000                        | sp 095218 ZRAB2_HUMAN |
| 1870 | ESEDKPEIEDVGSDEEEKKGDK200000000000            | sp P07900 HS90A_HUMAN |
| 1871 | SSPELLPSGVTDENEVTTAVTEK2E+22                  | sp P42566 EPS15_HUMAN |
| 1872 | SPGSTPTTPTSSQAPQK220000000000                 | sp P35658 NU214_HUMAN |
| 1873 | GFEEHKSDDSSDDEQEKKPEAPK22000000000000         | sp Q13435 SF3B2_HUMAN |



|      |                                             |                       |
|------|---------------------------------------------|-----------------------|
| 1874 | TASISSPSEGTPTVGSYGCTPQSLPK2E+23             | sp Q6PKG0 LARP1_HUMAN |
| 1875 | TEHSHSPGDSSAPIQNTDCCHSSER2E+20              | sp Q13129 RLF_HUMAN   |
| 1876 | GLSVDSAQEVK2000000000                       | sp Q9Y4A5 TRRAP_HUMAN |
| 1877 | EQGTESRSSTPLPTISSSAENTR2220000000000000     | sp P42167 LAP2B_HUMAN |
|      |                                             | sp P42166 LAP2A_HUMAN |
| 1878 | VVEAVNSDSDSEFGIPK202020000000               | sp Q02880 TOP2B_HUMAN |
| 1879 | LSGGLGAGSCR2000                             | sp Q04695 K1C17_HUMAN |
| 1880 | ALIQTCLNSPDSPPR20000                        | sp P11831 SRF_HUMAN   |
| 1881 | RSSQSPPTAVPASDSPPTK200200000000000000       | sp Q3KQU3 MA7D1_HUMAN |
| 1882 | NGSEADIDEGLYSR20000000000000                | sp P22314 UBA1_HUMAN  |
| 1883 | EESEEAEPVQR200200000000                     | sp Q9BW71 HIRP3_HUMAN |
| 1884 | SKSDSYTLDPDTLR20000000000000                | sp 075592 MYCB2_HUMAN |
| 1885 | LSSGFDDIDLPSAVK2000000000000000             | sp Q9Y446 PKP3_HUMAN  |
| 1886 | EAYNDSSDEESSHHGPGVQCAHQ2. 2E+19             | sp 060884 DNJA2_HUMAN |
| 1887 | TQEDEEEISTSPGVSEFVSDAFDACNLNQEDLR2E+33      | sp Q96A49 SYAP1_HUMAN |
| 1888 | SSFASSASDASKPSSPR2000                       | sp Q96IF1 AJUBA_HUMAN |
| 1889 | LQPQEISPPPTANLDR200000000000                | sp Q05397 FAK1_HUMAN  |
| 1890 | SAPTSPTATNISSK22000000000000                | sp Q9H792 PEAK1_HUMAN |
| 1891 | SEDPPGQEAEGSEEGSSASGLAK20000000000000       | sp 075153 CLU_HUMAN   |
| 1892 | GLRDSHSSEDEASSQTDLSTISK2. 02E+21            | sp Q5JTV8 TOIP1_HUMAN |
| 1893 | KLEGNPQGSNGVK2000000                        | sp P61006 RAB8A_HUMAN |
| 1894 | SYLEGSSDNQLKDESTPVDDR2. 000022E+22          | sp Q9UHI6 DDX20_HUMAN |
| 1895 | KNSTDLDLAPEDPTSPK2000020000002000           | sp Q96RK0 CIC_HUMAN   |
|      |                                             | sp P49792 RBP2_HUMAN  |
|      |                                             | sp Q7Z3J3 RGPD4_HUMAN |
| 1896 | EDALDDSVSSSSVHASPLASSPVR20000               | sp 014715 RGPD8_HUMAN |
|      |                                             | sp Q99666 RGPD5_HUMAN |
|      |                                             | sp A6NKT7 RGPD3_HUMAN |
| 1897 | SPTAALNESLVECPK20000020000000               | sp Q53EZ4 CEP55_HUMAN |
| 1898 | LQSPIKEENTTAVEEIGR200000000000000000        | sp Q9NS73 MBIP1_HUMAN |
|      |                                             | sp Q00526 CDK3_HUMAN  |
| 1899 | IGEGTYGVVYK23000000                         | sp P06493 CDK1_HUMAN  |
|      |                                             | sp P24941 CDK2_HUMAN  |
| 1900 | REEGPPPPSPDGASSDAEPEPPSGR200000000000000000 | sp Q9NTJ3 SMC4_HUMAN  |
| 1901 | DDDTASVTLNSSATGR20200000000000              | sp P21675 TAF1_HUMAN  |
| 1902 | GPPQSPVFEGVYNNR20000000000000               | sp Q8WWM7 ATX2L_HUMAN |
| 1903 | SGSAAQAEGLCK20000000000000                  | sp Q92685 ALG3_HUMAN  |
| 1904 | GPPDFSSDEEREPTPVLGSGAAAAGR2E+20             | sp P42167 LAP2B_HUMAN |
|      |                                             | sp P42166 LAP2A_HUMAN |
| 1905 | SASSDTSEELNSQDSPPK220220000000000000        | sp 014745 NHRF1_HUMAN |
| 1906 | NMGGPYGGNYGPGSGGGYGR1E+24                   | sp P22626 ROA2_HUMAN  |
| 1907 | ATSSSGSLSATGR200000000000                   | sp Q03252 LMNB2_HUMAN |
| 1908 | KPPAPSPVQSQSPSTNWSPAVPVK2. 00000002002E+19  | sp Q8IYB3 SRRM1_HUMAN |
| 1909 | HQEVQDQDPVFQGS DSSGYQSDHKK22030200000       | sp Q3B726 RPA43_HUMAN |
| 1910 | LFEESDDKEDEDADGKEVEDADEK2E+20               | sp 043719 HTSF1_HUMAN |
| 1911 | SNSLPHSAVSNAGSK200000000000000000           | sp Q8TBZ3 WDR20_HUMAN |
| 1912 | ECINAAPDPSK20000                            | sp Q7Z569 BRAP_HUMAN  |
| 1913 | KVVDYSQFQESDDADEDYGR200000000000            | sp Q9H1E3 NUCKS_HUMAN |
| 1914 | RDSSESQLASTESDKPTTGR200000000000000000      | sp Q96B23 CRO25_HUMAN |
| 1915 | SSSVSPSSWK2000000                           | sp Q96JM3 CHAP1_HUMAN |
| 1916 | AEAPSPDVAPAGK220000000000                   | sp Q9P1Y6 PHRF1_HUMAN |
| 1917 | HGSFNTVQASER200000000000                    | sp Q96AV8 E2F7_HUMAN  |
| 1918 | ATTPADGEEPAPAEALAAAR2E+19                   | sp Q96S44 PRPK_HUMAN  |
| 1919 | RSSLPLDHGSPAQENPESEK200000000000000000      | sp Q5VZ89 DEN4C_HUMAN |

|      |                                                    |                       |
|------|----------------------------------------------------|-----------------------|
| 1920 | LPGSGAVQAASPER20000                                | sp Q86U90 YRDC_HUMAN  |
| 1921 | SLSSGESGPGSPTHSHLSR2000200000000000                | sp Q6P0Q8 MAST2_HUMAN |
| 1922 | FLETDSEEEQEVEVNEK20200000000000                    | sp Q76FK4 NOL8_HUMAN  |
| 1923 | SLESSVIMDR200000000000                             | sp Q9H2Y7 ZN106_HUMAN |
| 1924 | TSSGTSLSAMHSSGSSGK20000001000000000                | sp Q12888 TP53B_HUMAN |
| 1925 | SDISDQEEDEESEGPCVSNLSK2E+23                        | sp Q15154 PCM1_HUMAN  |
| 1926 | GSDALSETSSVSHIEDLEK22200000000000                  | sp Q6P996 PDXD1_HUMAN |
| 1927 | SPHQLLSPSSFSPSATPSQK2E+20                          | sp Q14181 DPOA2_HUMAN |
| 1928 | QPDISCILGTGGKSPR2000                               | sp P57740 NU107_HUMAN |
| 1929 | AGDLLEDSPKRPK2000000                               | sp P51858 HDGF_HUMAN  |
| 1930 | LTSVSSVDFDQR2002000000000                          | sp Q5T3F8 CSCL2_HUMAN |
| 1931 | AQSLVISPPAPSPR2000                                 | sp P46013 KI67_HUMAN  |
| 1932 | TSSAFVGTPEASPEPK2000200000                         | sp Q99460 PSMD1_HUMAN |
| 1933 | TPSSSSTLAYSPR220000000000                          | sp Q6Q0C0 TRAF7_HUMAN |
| 1934 | KTSFDQSDVDIFPSDFPTEPPSLPR2.000002E+25              | sp Q02880 TOP2B_HUMAN |
| 1935 | SPLNSCKDPYGGSEGTFSSR2.0002E+20                     | sp Q8N4S9 MALD2_HUMAN |
| 1936 | HSTPSNNSNPSGPPSPNSPHR20000000                      | sp Q9Y5S2 MRCKB_HUMAN |
| 1937 | DSAIPVESDTEDEGAPR20200000000                       | sp Q96D46 NMD3_HUMAN  |
| 1938 | STQESLTAGGTDLK20000000000000                       | sp Q15345 LRC41_HUMAN |
| 1939 | VSALEEDMDDVESSEEEEEDEK220000000000                 | sp Q8NAV1 PR38A_HUMAN |
| 1940 | RPSASSPNNNTAAK2000000000000                        | sp O75151 PHF2_HUMAN  |
| 1941 | KLTSDEEGEPSGK200000000000                          | sp Q8WVC0 LEO1_HUMAN  |
| 1942 | DPTSLLGVLQAEADSTSEGLEDAVHSR22000000000000          | sp Q27J81 INF2_HUMAN  |
| 1943 | KLSSSEPYEEDFNDDQSIKK2.202E+20                      | sp Q9H4L7 SMRCD_HUMAN |
| 1944 | SGAQASSTPLSPTR20000                                | sp P02545 LMNA_HUMAN  |
| 1945 | NLNSNLFSVNR2000200000                              | sp P52948 NUP98_HUMAN |
| 1946 | NKLEGSDVDSELEDR20002000000                         | sp Q92614 MY18A_HUMAN |
| 1947 | DGTAPPPQSPGSPGTGQDEEWSDEESPR20000000               | sp Q9UKS6 PACN3_HUMAN |
| 1948 | SPGSISYLPFFTK2000000000000000                      | sp O75376 NCOR1_HUMAN |
| 1949 | ASFGATGGPPAHLTPSPLSGPGSSLLEK2020000000000000       | sp O14686 KMT2D_HUMAN |
| 1950 | SIDPDSIQSALLASGLGSK2E+19                           | sp A3KN83 SBN01_HUMAN |
| 1951 | SASQSSLDKLDQELK20020000000000                      | sp O60271 JIP4_HUMAN  |
| 1952 | QSPECENFLDVGLGR2000000000000000                    | sp Q12802 AKP13_HUMAN |
| 1953 | LSSTDDGYIDLQFK200000000000                         | sp Q96A57 TM230_HUMAN |
| 1954 | FICVTPTCSNTIDLPMSPR20000000000002000               | sp P40763 STAT3_HUMAN |
| 1955 | RPAAAAAAGSASPR202000                               | sp Q96S55 WRIP1_HUMAN |
| 1956 | MESEGGADDSAEGLDLDLDDDDNEDRGDDQLELIK1.020000002E+34 | sp P07910 HNRPC_HUMAN |
| 1957 | SGSAAQAEGLCK20200000000000                         | sp Q92685 ALG3_HUMAN  |
| 1958 | TGQAGSLSGSPKPFSPQLSAPITTK2020000000000000000       | sp Q9ULU4 PKCB1_HUMAN |
| 1959 | KRSSSEDDDLVDESDFDDASINSYSVSDGSTSR2.22000000002E+31 | sp Q14839 CHD4_HUMAN  |
| 1960 | AEEEEASTEEEDKEGAVVSAPSVK2200000000000000000        | sp Q14160 SCRIB_HUMAN |
| 1961 | VDHGAEIITQSPGR20000                                | sp P11137 MTAP2_HUMAN |
| 1962 | TAVSVTQGGHSR200                                    | sp P40425 PBX2_HUMAN  |
| 1963 | LPSTDDCPAIGTPLR20000000020000                      | sp Q15648 MED1_HUMAN  |
| 1964 | DHSPTPSVFNSDEER20200000200000                      | sp Q6UN15 FIP1_HUMAN  |
| 1965 | VSKDDRSDVESSEEDVTCTK2000222000000000000            | sp Q8N5B7 CERS5_HUMAN |
| 1966 | AHSPAEGASVSSSPGPK200000000000000000                | sp Q8NFG4 FLCN_HUMAN  |
| 1967 | ADEASELACPTPK2000                                  | sp P49327 FAS_HUMAN   |
| 1968 | HCAPSPDRSPELSSSR2000200000000                      | sp Q96T37 RBM15_HUMAN |
| 1969 | GSPATSPHLGR2000000                                 | sp Q13671 RIN1_HUMAN  |
| 1970 | AQTPPGPSLSGSK2000000000000                         | sp Q9UQ35 SRRM2_HUMAN |
| 1971 | SPSDSSTASTPVAEQIER2000000000000000                 | sp Q16643 DREB_HUMAN  |
| 1972 | DSQDASAEQSDHDDEVASLASGGFGTK2E+24                   | sp Q6P2E9 EDC4_HUMAN  |
| 1973 | SSPGAVAGLSNAPGTPR20000000000002000                 | sp Q9BWG4 SSBP4_HUMAN |

|      |                                                       |           |             |
|------|-------------------------------------------------------|-----------|-------------|
| 1974 | STPESGSDKESVGSSTSNEGGR2.002E+20                       | sp Q6GQQ9 | OTU7B_HUMAN |
| 1975 | SPQTLAPVGEDAMK20000000000000                          | sp Q92797 | SYMPK_HUMAN |
| 1976 | SVASNQSEMEFSSLQDMPK2002010000001000                   | sp Q8N163 | CCAR2_HUMAN |
| 1977 | SSAEAQTPEDTPNK20000000000000                          | sp 043493 | TGON2_HUMAN |
| 1978 | SQSSEGVSSLSSSPSNSLETQSQSLSR200                        | sp 095155 | UBE4B_HUMAN |
| 1979 | GVHIHQAGGSPPASSTSSSSLTNDVAK20000000000000             | sp Q8N122 | RPTOR_HUMAN |
| 1980 | GSFKDDPQLYQEIQER2000000000000000                      | sp Q5VV41 | ARHGG_HUMAN |
| 1981 | DSELKTPPSVGPSPVTVTLESAPSALEK2.00002E+21               | sp Q96T58 | MINT_HUMAN  |
| 1982 | KKEEPSQNDISPK2000                                     | sp Q9NR30 | DDX21_HUMAN |
| 1983 | ASIGQSPGLPSTTFK200000000000                           | sp Q5VT52 | RPRD2_HUMAN |
| 1984 | DYEPSPSPAPGAPPPPPQR2000000000000000                   | sp P55196 | AFAD_HUMAN  |
| 1985 | GRGPPSSDSEPEAELER22202000000000                       | sp Q7Z4V5 | HDGR2_HUMAN |
| 1986 | ELEENDSENSEFEDDGSEK20020000002000                     | sp 043719 | HTSF1_HUMAN |
| 1987 | AEAGAGSATEFQFR2000000000                              | sp Q9NQ39 | RS10L_HUMAN |
| 1988 | AGDLEDSPK2000                                         | sp P46783 | RS10_HUMAN  |
| 1989 | IALESEGRPEEQMESDNCSGGDDWHLSSK20000000000000           | sp P51858 | HDGF_HUMAN  |
| 1990 | TNSPAYSDISDAGEDGEGKVDVSK2.0002002E+22                 | sp Q13501 | SQSTM_HUMAN |
| 1991 | EIQNGNLHESDESVPVR2000000000                           | sp 015014 | ZN609_HUMAN |
| 1992 | LQEEGGGDEEETGSPSEDGMQSAR200000000000100000            | sp Q86UP2 | KTN1_HUMAN  |
| 1993 | ELVGDTSQEGDHEPSGSETEEDTSSSPHR2.00000002E+23           | sp Q13610 | PWP1_HUMAN  |
| 1994 | KPSPSEPEPWKFPFAVSPPEPR2.0002E+20                      | sp PODJ93 | SIM13_HUMAN |
| 1995 | AVPMAPAPASPGSSNDSSAR20000000000000                    | sp Q96JM3 | CHAP1_HUMAN |
| 1996 | GESAPTLSTSPSPSSPSPSPTLGR202000000000                  | sp Q66K74 | MAP1S_HUMAN |
| 1997 | QEIESDESSELDGELQDR20202000000000                      | sp Q9H330 | TM245_HUMAN |
| 1998 | GYSPYSVSGSGSTAGSR2000000000000000                     | sp Q9BYW2 | SETD2_HUMAN |
| 1999 | DTVIIIVSEPEDEESQGLPTMAR200200002000000000             | sp Q15149 | PLEC_HUMAN  |
| 2000 | NTSSDNDVEVMPAQSPR2002000000002000                     | sp Q9H4L7 | SMRCD_HUMAN |
| 2001 | TGSVQTPPDLESSEEVDAEAGAPEVVGPK2.000000002E+27          | sp Q9HCK8 | CHD8_HUMAN  |
| 2002 | SGDETPGSEVPGDK2000200200000000                        | sp P28290 | SSFA2_HUMAN |
| 2003 | LQEEGGGDEEETGSPSEDGMQSAR200000020000000000            | sp Q1KMD3 | HNRL2_HUMAN |
| 2004 | KPSVGVPPPASPSPYPR2000000020000000                     | sp Q13610 | PWP1_HUMAN  |
| 2005 | ALEVEESNSEDEASFK202000000000                          | sp Q9P206 | K1522_HUMAN |
| 2006 | SSSQSPSPGNHTSNSSNASNATVVPQNSSAR2.00202E+31            | sp Q03111 | ENL_HUMAN   |
| 2007 | HEAPSPISGQPCGDDQNASPSK200000000000000000              | sp Q9BTA9 | WAC_HUMAN   |
| 2008 | IVSGSPISTPSPSPLPR2000000000200000                     | sp 075376 | NCOR1_HUMAN |
| 2009 | QLAQSSALASLTGLGGLGGYSGDSEDER30000200000               | sp Q9ULM3 | YETS2_HUMAN |
| 2010 | TGSVQTPPDLESSEEVDAEAGAPEVVGPK2.000000022E+27          | sp Q8TF01 | PNISR_HUMAN |
| 2011 | SPHSPSIATPPSQSSSCDAPMLSTVHSAK2.020002E+28             | sp P28290 | SSFA2_HUMAN |
| 2012 | MESEGGADDSAEGLDLLDDDDNEDRGDDQLELIKDDEK1.000000002E+38 | sp Q9NYF8 | BCLF1_HUMAN |
| 2013 | TEELIESPKLESSEGEIIQTVDR200000000000000000             | sp P07910 | HNRPC_HUMAN |
| 2014 | SKSPNNEGDVHFSR2000000000000000                        | sp Q99590 | SCAFB_HUMAN |
| 2015 | MVIQGPSSPQGEAMVTDVLEDQK200000100000000000             | sp Q8NAP3 | ZBT38_HUMAN |
| 2016 | SEDDSAVPLAK20000000000000                             | sp Q12888 | TP53B_HUMAN |
| 2017 | SPTGNTPPVIDSVSEK2000000000000000                      | sp Q9Y2W2 | WBP11_HUMAN |
| 2018 | SGSMDPSGAHPSVR2000000000000000                        | sp P25054 | APC_HUMAN   |
| 2019 | KPSDDKHFGQAPSK20000000000000                          | sp Q07666 | KHDR1_HUMAN |
| 2020 | ATVPVAAATAAEGEGSPPAVAAVAGPPAAAEEVGGVGGSSR2E+40        | sp Q5VT52 | RPRD2_HUMAN |
| 2021 | SASADNLTLPK2000000000                                 | sp 075179 | ANR17_HUMAN |
| 2022 | NHETDGGSAHGDDDDGPHFEPVVPLPK2E+22                      | sp Q8ND76 | CCNY_HUMAN  |
| 2023 | KAASPSQSVR202000000                                   | sp P49792 | RBP2_HUMAN  |
| 2024 | WDKDDFESEEDVK20000000                                 | sp Q8IYB3 | SRRM1_HUMAN |
| 2025 | TDGSIQDRQPVTVADYISR202000000000000000                 | sp Q7Z6E9 | RBBP6_HUMAN |
|      |                                                       | sp P51116 | FXR2_HUMAN  |

|      |                                                    |                       |
|------|----------------------------------------------------|-----------------------|
| 2026 | RPDDVPLSLSPSK20000                                 | sp Q9UFC0 LRWD1_HUMAN |
| 2027 | STIGVMVTASHNPEEDNGVK200000000000                   | sp O95394 AGM1_HUMAN  |
| 2028 | SEALSSVLDQEEAMEIK200022000000000000                | sp Q12888 TP53B_HUMAN |
| 2029 | QPSDASETTGLVQR2000000000000                        | sp O15085 ARHGB_HUMAN |
| 2030 | NYQQNYQNSSEGEKNEGSESAPEGQAQR2. 02E+21              | sp P67809 YBOX1_HUMAN |
| 2031 | VYLSDSDNNSLETGEILK2020000000000000                 | sp Q9NSI6 BRWD1_HUMAN |
| 2032 | SPGPGPGGAGAEPGATGGSSHFISSR2E+27                    | sp Q9ULI0 ATD2B_HUMAN |
| 2033 | GSETGSETHESDLAPSDK200020000000000000               | sp P48634 PRC2A_HUMAN |
| 2034 | TVSLTPSPTTQVETPDLVDHDNTSPLFR2. 02E+24              | sp Q05209 PTN12_HUMAN |
| 2035 | TLDSGTSEIVKSPR2000                                 | sp Q9H501 ESF1_HUMAN  |
| 2036 | AVPMAPAPASPGSSNDSSAR100000200000000000             | sp Q66K74 MAP1S_HUMAN |
| 2037 | SSPNVANQPPSPGGK200000                              | sp P55196 AFAD_HUMAN  |
| 2038 | SPEPDGPAPAFLR2000000000000000                      | sp Q9Y4F5 C170B_HUMAN |
| 2039 | VQNSPPVGR2000000                                   | sp O95359 TACC2_HUMAN |
| 2040 | GVHIHQAGGSPPASSTSSSSLTNDVAK200000000000000000      | sp Q8N122 RPTOR_HUMAN |
| 2041 | SPTESVNTVPVGK20000000000000                        | sp Q8WXG6 MADD_HUMAN  |
| 2042 | KGSDDDGGDSPVQDIDTPEVDLYQLQVNTLR2. 0000002E+22      | sp O75446 SAP30_HUMAN |
| 2043 | RVSEVEEKEPVPQPLPSDDTR2E+20                         | sp O43290 SNUT1_HUMAN |
| 2044 | REEDEENDNDNESDHDEADS200000000                      | sp Q9NRG0 CHRC1_HUMAN |
| 2045 | RDSPLQSGGQNSQAGQR200000000000000000                | sp O95819 M4K4_HUMAN  |
| 2046 | RLSPSSSAASSYSFSDLNSTR200000000000000000            | sp P50402 EMD_HUMAN   |
| 2047 | REEQDTSDGESVTHHIR200000000000                      | sp P36915 GNL1_HUMAN  |
| 2048 | KESKEETSIDVAGKPNEVTK2E+19                          | sp P53985 MOT1_HUMAN  |
| 2049 | TPLSSLSATSNNSTVACIDR2022002000000000               | sp P00533 EGFR_HUMAN  |
| 2050 | SPQTLAPVGEDAMKTPSPAAEDAR2. 0000000000102E+24       | sp Q92797 SYMPK_HUMAN |
| 2051 | GARPPAAGPGGDEDEDEEDTAPESALDTSLDK20000000220000     | sp Q27J81 INF2_HUMAN  |
| 2052 | RASPPDPSPSAASASER200000000000000000                | sp Q9Y2F5 ICE1_HUMAN  |
| 2053 | SSSSGDDYAYTQALLLHQR200000000000000000              | sp Q8N5C8 TAB3_HUMAN  |
| 2054 | SKSGSEEVLCDSCIGNK2000000000000000                  | sp Q14134 TRI29_HUMAN |
| 2055 | SPPHSGFQQYQQADASK200000000000000000                | sp Q92540 SMG7_HUMAN  |
| 2056 | RDSSESQLASTESDKPTTGR202000000000000000             | sp Q96B23 CRO25_HUMAN |
| 2057 | EVDATSPAPSTSSTVK200000000000                       | sp Q16666 IF16_HUMAN  |
| 2058 | GPPDFSSDEEREPTPVLGSGAAAAGR2E+20                    | sp P42166 LAP2A_HUMAN |
|      |                                                    | sp P42167 LAP2B_HUMAN |
| 2059 | KGAGDGSDEEVDGKADGAEAKPAE200000000000000000         | sp P35579 MYH9_HUMAN  |
| 2060 | TSGSDDPGICSNTDSTQAQVLLGK2E+21                      | sp Q8NDI1 EHBP1_HUMAN |
| 2061 | SRSSSPVTELASR222000000000                          | sp Q9UQ35 SRRM2_HUMAN |
| 2062 | RLSGSSEDEEDSGKGEPTAK202200000000000000             | sp Q9BW71 HIRP3_HUMAN |
| 2063 | ASLGSLEGEAAEASSPK20000000002000                    | sp Q09666 AHNK_HUMAN  |
| 2064 | ALFKPPEDSQDDESDDAEEEEQTTK200002020000000000        | sp Q13769 THOC5_HUMAN |
| 2065 | ASMSEFLESEDGEVEQQR20000000000                      | sp Q15022 SUZ12_HUMAN |
| 2066 | SSSISEEKGSDDEKPR20000000020000000                  | sp Q9UKV3 ACINU_HUMAN |
| 2067 | IIEQLSPAATSR200000000                              | sp Q03468 ERCC6_HUMAN |
| 2068 | GTGSGGQLQDLDCSSSDDEGAAQNSTKPSATK220000000000000000 | sp P08240 SRPR_HUMAN  |
| 2069 | AGGDLSPGR2020000                                   | sp Q9BUH8 BEGIN_HUMAN |
| 2070 | LAAPSVSHVSPR2000                                   | sp Q8WXE1 ATRIP_HUMAN |
| 2071 | QNSPVTQDGIQESPWQDR200000000000000000               | sp O75815 BCAR3_HUMAN |
| 2072 | DSGSDEDFLMEDDDSDYGSSKK2. 0200000000002E+22         | sp Q9H1E3 NUCKS_HUMAN |
| 2073 | GPPDFSSDEEREPTPVLGSGAAAAGR2. 20000002E+21          | sp P42166 LAP2A_HUMAN |
|      |                                                    | sp P42167 LAP2B_HUMAN |
| 2074 | GEPNVSYICSR300000                                  | sp P49840 GSK3A_HUMAN |
|      |                                                    | sp P49841 GSK3B_HUMAN |
| 2075 | RPSVGSQSNQAGQGK2000000000000000                    | sp Q9UPP1 PHF8_HUMAN  |
| 2076 | VETVSPSESPKDTIDK200002000000000                    | sp Q99590 SCAFB_HUMAN |

|      |                                                           |                       |
|------|-----------------------------------------------------------|-----------------------|
| 2077 | VMTIPYQMPASSPVICAGGQDR1.0000000002E+22                    | sp Q15365 PCBP1_HUMAN |
| 2078 | GSVSSVSPKPPSSFK2000020000000000                           | sp Q9NZJ0 DTL_HUMAN   |
| 2079 | SWGQQAQEYQEYK2000000000000000                             | sp Q5VZK9 LR16A_HUMAN |
| 2080 | LSTTPTSSLHEDGVEDFR22000000000000                          | sp Q94842 TOX4_HUMAN  |
| 2081 | TPPGPPPDDEDDPVPLPVSGDK2E+24                               | sp Q69YN4 VIR_HUMAN   |
| 2082 | SINHQIESPSER200000                                        | sp Q9UPQ0 LIMC1_HUMAN |
| 2083 | TPLSFTNPLHSDDSDSDER2002020000                             | sp Q05209 PTN12_HUMAN |
| 2084 | ADEPSSEESDLEIDK220000000000                               | sp P50502 F10A1_HUMAN |
|      |                                                           | sp Q8IZP2 ST134_HUMAN |
| 2085 | AIGSTSKPQESPK2000                                         | sp P18887 XRCC1_HUMAN |
| 2086 | GGTTSWTSGQPSYDSSR2000000000                               | sp Q99081 HTF4_HUMAN  |
| 2087 | ESEVCPVTNSPSPPLPPPPLPK2.0000000002E+24                    | sp Q9ULJ3 ZBT21_HUMAN |
| 2088 | EHYPVSSPSPPAQPGGVS20200000000000                          | sp Q75179 ANR17_HUMAN |
| 2089 | VSPSPQESLSSKSDTDTGVCSTDEDPDDK2.02002022E+29               | sp Q5JSH3 WDR44_HUMAN |
| 2090 | RRGDSESEDEQDSEEV2020000000000000                          | sp Q9NZ63 CI078_HUMAN |
| 2091 | IESDTEETQDTSVDHNETGTGESSVEENEK2E+20                       | sp Q6PL18 ATAD2_HUMAN |
| 2092 | DFQEYVEPGEDFPASPQR20000                                   | sp Q9Y6G9 DC1L1_HUMAN |
| 2093 | DDSDDGGGWITPSNIK2000000000000000                          | sp Q9ULX3 NOB1_HUMAN  |
| 2094 | SLGPSLATDKS200000000000                                   | sp Q9H3N1 TMX1_HUMAN  |
| 2095 | AAHTEDINACTLTTSR2000                                      | sp P04049 RAF1_HUMAN  |
| 2096 | AGMSSNQSISSPVLDAVPR100002002000000000                     | sp Q9UQ35 SRRM2_HUMAN |
| 2097 | GAPSSPATGVLPSQPK20000000200000                            | sp Q5SRE5 NU188_HUMAN |
| 2098 | EVHDELEDLPSPPPLSPPPTTSPHK20000020000000000                | sp Q9NQX3 GEPH_HUMAN  |
| 2099 | SGSLDSSFQELPASSK2000000000000000                          | sp Q9UMZ2 SYNRG_HUMAN |
| 2100 | SEPVKEESSELEQPFQDTSSVGPDR2.2E+19                          | sp Q15424 SAFB1_HUMAN |
|      |                                                           | sp Q14151 SAFB2_HUMAN |
| 2101 | EDKSPSEESAPTTSPESVSGVSSGSSGR2E+22                         | sp P54725 RD23A_HUMAN |
| 2102 | AYACHAEHENDSDDDDEAEDDDETEELGSEDDIDEDGQEYLEILAK2.00002E+24 | sp Q95373 IPO7_HUMAN  |
| 2103 | KPSDSLVAASSR20020000                                      | sp Q5T0W9 FA83B_HUMAN |
| 2104 | EISSPESCPPEIK220000000000                                 | sp Q92889 XPF_HUMAN   |
| 2105 | VPLAPITDPQQLQLSPLK20000                                   | sp P31350 RIR2_HUMAN  |
| 2106 | DIKEESDEEEEDDEESGR20000000000000                          | sp Q96EV2 RBM33_HUMAN |
| 2107 | SPGSTPTTSSQAPQK200000000000                               | sp P35658 NU214_HUMAN |
| 2108 | AMDNHSDEEELAAFCPLDDSTVAR2.02E+21                          | sp Q86VR2 F134C_HUMAN |
| 2109 | SFSLASSNSPISQR2000000                                     | sp Q9BXB4 OSB11_HUMAN |
| 2110 | HQEVQDQDPVFQGSQSDSSGYQSDHKKK20220002000000                | sp Q3B726 RPA43_HUMAN |
| 2111 | SDAEEDGGTVSQEEDRKP2.000000002E+20                         | sp P27824 CALX_HUMAN  |
| 2112 | VISDESIDIGSDVEFKPDK2.02E+19                               | sp P52701 MSH6_HUMAN  |
| 2113 | ASEDTTSGSPPK200000                                        | sp Q9BZZ5 API5_HUMAN  |
| 2114 | LEGSDDLLSDSEEHSR2000000000                                | sp Q9NR09 BIRC6_HUMAN |
| 2115 | TGSYGALAEITASK300000000000                                | sp Q14974 MYPT1_HUMAN |
| 2116 | SPSGPVKSPPLSPVGTTPVK20002000000000                        | sp Q9BVC5 ASHWN_HUMAN |
| 2117 | SSPELEDTATSSK20000000000000                               | sp P46013 KI67_HUMAN  |
| 2118 | EEPLSEEPCTSTAIASPEK2000000000020000                       | sp Q9Y2X3 NOP58_HUMAN |
| 2119 | GPPDFSSDEEREPTPVLGSGAAAAGR2.20000002E+21                  | sp P42167 LAP2B_HUMAN |
|      |                                                           | sp P42166 LAP2A_HUMAN |
| 2120 | HASSPESPKPAPAGSHR222002000000000000                       | sp Q9UQ35 SRRM2_HUMAN |
| 2121 | SPSPDGSPAATPEIR2000020000000000                           | sp Q00499 BIN1_HUMAN  |
| 2122 | TVSTSTSGNDFEETK22000000000000                             | sp Q8TF72 SHRM3_HUMAN |
| 2123 | NLETLPFSFSDSEEDSVAK220000000000                           | sp Q9ULL5 PRR12_HUMAN |
| 2124 | SDSLSPPR2020000                                           | sp Q9UPQ0 LIMC1_HUMAN |
| 2125 | DHSPTPSVFNSDEER20000000200000                             | sp Q6UN15 FIP1_HUMAN  |
| 2126 | LVSPGSANETSSILVESVTR200000000000000000                    | sp Q75369 FLNB_HUMAN  |

|      |                                                  |                       |
|------|--------------------------------------------------|-----------------------|
| 2127 | KPSPAQAAETPALELPLPSVPAPAPL2E+24                  | sp Q8WX92 NELFB_HUMAN |
| 2128 | TASGSSVTSLDGTR202020000000000                    | sp Q92597 NDRG1_HUMAN |
| 2129 | GSSGSVDETLFALPAASEPVIR2. 2E+21                   | sp Q9NQC3 RTN4_HUMAN  |
| 2130 | HGGSPQPLATTPLSQEPVNPPEASPTR20000                 | sp Q9UQ35 SRRM2_HUMAN |
| 2131 | TSIDSIDSGVELTTSFK20020020000000000               | sp O15403 MOT7_HUMAN  |
| 2132 | HLDGEEDGSSDQSQASGTTGGR220000000000000            | sp Q9UNF1 MAGD2_HUMAN |
| 2133 | SRSSDIVSSVR20000000000                           | sp Q14C86 GAPD1_HUMAN |
| 2134 | LATNTSAPDLK2000000                               | sp P27816 MAP4_HUMAN  |
| 2135 | SEVQQPVHPKPLSPDSR200200                          | sp Q9UHB6 LIMA1_HUMAN |
| 2136 | DGDKSPMSSLQISNEK2000000000000                    | sp Q9UER7 DAXX_HUMAN  |
| 2137 | SVSASSGPCSPAAPHPPPPR20002000000000000            | sp Q86UY5 FA83A_HUMAN |
| 2138 | QSETVDQNSDSEMLAILK202000000000                   | sp P46100 ATRX_HUMAN  |
| 2139 | SSSEDDLDVESDFDDASINSYSVSDGSTSR2. 22E+31          | sp Q14839 CHD4_HUMAN  |
| 2140 | KLSSSEPEYEDEFNDDQSIKK2200300000000000000         | sp Q9H4L7 SMRCD_HUMAN |
| 2141 | DEVFHTDQDDPSSDDEGMPYTRPVK222000000000000         | sp Q5JSH3 WDR44_HUMAN |
| 2142 | KLSDPCPVESK20000000000                           | sp O60244 MED14_HUMAN |
| 2143 | SHVEDGDIAGAPASSPEAPAEQDPVQLK200000000000000      | sp Q9P2E9 RRBP1_HUMAN |
| 2144 | SKFDSDEEEDTENVEAASSGK20000000000000000           | sp Q8TF01 PNISR_HUMAN |
| 2145 | RNSSEASSGDFLDL200000000000000                    | sp Q9UK76 HN1_HUMAN   |
| 2146 | LGSVDSFER20000000                                | sp O60343 TBCD4_HUMAN |
| 2147 | NMTVEQLLTGSPSPTVEPEKPTR1. 000000000002E+23       | sp Q9C0C9 UBE20_HUMAN |
| 2148 | NSLDDLVGPPSNLEGQSDER2E+19                        | sp Q9Y6Q9 NCOA3_HUMAN |
| 2149 | GSSDGRGSDSEDLPHR20200000000                      | sp Q9UPQ0 LIMC1_HUMAN |
| 2150 | SSSNDVDEETAESDTPVLEK2000020000000000000          | sp Q99590 SCAFB_HUMAN |
| 2151 | AGSSGNSCITYQPSVSGEHK2000000000000000000          | sp Q99755 PI51A_HUMAN |
| 2152 | THSTSSSLGSGESPF20000000000000000                 | sp Q9UGV2 NDRG3_HUMAN |
| 2153 | GQKPALDCSQVSPRPATSPENNASLSDTSPMDSSPSGIPK2. 2E+24 | sp P18858 DNLI1_HUMAN |
| 2154 | YYDDIYFDSSEDEDR202000000                         | sp Q56P03 EAPP_HUMAN  |
| 2155 | RNSSEASSGDFLDL200000000000000                    | sp Q9UK76 HN1_HUMAN   |
| 2156 | SPISDNSGCDAPGNSNPSLSPSSAESEK200000000000000      | sp Q99590 SCAFB_HUMAN |
| 2157 | NSSPAPPQAPGK2000000000000                        | sp Q9NYV4 CDK12_HUMAN |
| 2158 | TPMYGSQTPLQDGSR200000000                         | sp O00267 SPT5H_HUMAN |
| 2159 | QRPVPQSSASLDEYTLMR20000000000                    | sp Q9Y4H2 IRS2_HUMAN  |
| 2160 | SPQQTVPYVVPLSPK2000000000002000                  | sp Q9UQR0 SCML2_HUMAN |
| 2161 | HLDGEEDGSSDQSQASGTTGGR200000000000000            | sp Q9UNF1 MAGD2_HUMAN |
| 2162 | ESCSSPSTVGSLLTTR20000000000000000                | sp Q7Z589 EMSY_HUMAN  |
| 2163 | SSTPPGESYFGVSSLQLK20000000000000000              | sp Q9UQ35 SRRM2_HUMAN |
| 2164 | DLDDALDKLSDSLGQR20000000                         | sp P20810 ICAL_HUMAN  |
| 2165 | SAAQAAAQTNNAAGK2000000                           | sp Q8NC51 PAIRB_HUMAN |
| 2166 | LGVSVSPSR20000                                   | sp Q86VM9 ZCH18_HUMAN |
| 2167 | AYSPTCSPTLGFK2000200000000                       | sp Q5TGY3 AHDC1_HUMAN |
| 2168 | SQEMVHLVNK200000000000                           | sp P16070 CD44_HUMAN  |
| 2169 | KISVVSATK20000000                                | sp Q9UKV3 ACINU_HUMAN |
| 2170 | GAPPGSPEPPALLAAPLAAGACPGGR2E+21                  | sp Q9Y4B5 MTCL1_HUMAN |
| 2171 | QASPETSASPDGSQNLVYETELLR2E+22                    | sp Q14789 GOGB1_HUMAN |
| 2172 | TSPLKDNPSPEPQLDDIK2000000200000000000            | sp Q96JC9 EAF1_HUMAN  |
| 2173 | ASGPPVSELITK2000000000000                        | sp P10412 H14_HUMAN   |
|      |                                                  | sp P16403 H12_HUMAN   |
|      |                                                  | sp P16402 H13_HUMAN   |
| 2174 | STSAPQMSPGSSDNQSSSPQAQK2000000000000000000       | sp Q14157 UBP2L_HUMAN |
| 2175 | GPSPSSPTPPAAAAPAEQAPR2. 02E+19                   | sp Q86VQ1 GLC11_HUMAN |
| 2176 | QDPVTYISETDEEDDFMCK2000020000001000              | sp P35251 RFC1_HUMAN  |
| 2177 | FTSQDASTPASSELNK2000200000000000                 | sp Q9HAW4 CLSPN_HUMAN |
| 2178 | RPASVSSAAVEHEQR200000000000000                   | sp Q7Z5L9 I2BP2_HUMAN |

|      |                                                           |                       |
|------|-----------------------------------------------------------|-----------------------|
| 2179 | ASESSSEEKDDYEIFVK2220000000000000                         | sp P18583 SON_HUMAN   |
| 2180 | QSFDDNDSELEDKDSK200000000000000000                        | sp O60841 IF2P_HUMAN  |
| 2181 | SVQEGENPDDGVR2000000000000000                             | sp P42696 RBM34_HUMAN |
| 2182 | TPHVQAVQGPLGSPPK20000                                     | sp Q15149 PLEC_HUMAN  |
| 2183 | KADTTTPTTAILAPGSPASPPGSLEPK2002000000000                  | sp P25440 BRD2_HUMAN  |
| 2184 | KGSSSSVCSVASSDISLGSTK200000000000000000                   | sp Q9ULT8 HECD1_HUMAN |
| 2185 | TASPPPPPK2020000000                                       | sp Q8IYB3 SRRM1_HUMAN |
| 2186 | APAGQEEPGTPSSPLSAEQLDR2000000000000000                    | sp P13051 UNG_HUMAN   |
| 2187 | IGFPETEEELIEIASENSDFIFPSAPDVK2002000000000000             | sp Q9Y3F4 STRAP_HUMAN |
| 2188 | DELNEELIQEESSEDEGEYEEVRK2200000000000000                  | sp O60524 NEMF_HUMAN  |
| 2189 | GSAPHSESDLPEQEEIILGSDDEQEDPNDYCK2.000002E+32              | sp Q96SB4 SRPK1_HUMAN |
| 2190 | KHSPSPPPPTPTESR2020000000000000                           | sp Q92922 SMRC1_HUMAN |
| 2191 | NYQQNYQNSSEGEKNEGSESAPEGQAQQR3E+24                        | sp P67809 YBOX1_HUMAN |
| 2192 | TPSDDEEDNLFAPPK2000000000000000                           | sp Q641Q2 FA21A_HUMAN |
| 2193 | LPPTFFCGVCSDTDEDNGNGEDFQSELQK2.02E+19                     | sp Q9Y4E1 FA21C_HUMAN |
| 2194 | SVASSQPAKPTK20020000000000                                | sp P49792 RBP2_HUMAN  |
| 2195 | ATSAGSSPSCSLAGR200000000000                               | sp Q07157 ZO1_HUMAN   |
| 2196 | GRASPGGVSTSSSDGK2000000000000000                          | sp Q9BXB5 OSB10_HUMAN |
| 2197 | VEENPDADSDFDAKSSADDEIEETR200000220000000000               | sp P54259 ATN1_HUMAN  |
| 2198 | RASGQAFELILSPR2000000002000                               | sp Q9H0G5 NSRP1_HUMAN |
| 2199 | SLSGSSPCPK202000000000                                    | sp P16949 STMN1_HUMAN |
| 2200 | SCTPSPDQISHR2000000000                                    | sp Q9UQ35 SRRM2_HUMAN |
| 2201 | TLSSSAQEDIIR2000000000                                    | sp Q7Z2W4 ZCCHV_HUMAN |
| 2202 | KPSPSESPKPFPAVSPPEPR20000000000200000                     | sp Q9H788 SH24A_HUMAN |
| 2203 | TTSSDLTSSSSSGPR2000000000000000                           | sp Q96JM3 CHAP1_HUMAN |
| 2204 | QRSPSPAPAPAAAAAGPPTR2.02E+19                              | sp Q5QP82 DCA10_HUMAN |
| 2205 | QAPGVGAVGGGSPER20000                                      | sp Q9H7N4 SFR19_HUMAN |
| 2206 | GAQASSGSPALPR2000000                                      | sp Q96G74 OTUD5_HUMAN |
| 2207 | KKPGDASSLPDAGLSPGSQVDSK2000000000                         | sp P42684 ABL2_HUMAN  |
| 2208 | SPGHMVIDLQTK200010000000                                  | sp Q13459 MYO9B_HUMAN |
| 2209 | LLKPGEEPSEYTDEEDTK20000000                                | sp Q9NWH9 SLTM_HUMAN  |
| 2210 | DKSPVREPIDNLTPEER2000000000000000                         | sp O15173 PGRC2_HUMAN |
| 2211 | QNPEQSADEDAEKNEEDSEGSSDEDEDEDGVSAAATFLK2.000000000002E+33 | sp Q14498 RBM39_HUMAN |
| 2212 | LTFDSSFSPNTGK2000000                                      | sp B5ME19 EIFCL_HUMAN |
| 2213 | CVSVQTDPTDEIPTK2000000000000000                           | sp Q99613 EIF3C_HUMAN |
| 2214 | TASISSPSEGTPVGSYGCTPQSLPK2.2E+22                          | sp P21796 VDAC1_HUMAN |
| 2215 | HNSASVENVSLR200000000000                                  | sp P18583 SON_HUMAN   |
| 2216 | RLSPSSSAASSYSFSDLNSTR2E+20                                | sp Q6PKG0 LARP1_HUMAN |
| 2217 | KPSTSDSDSNFEK20200200000000                               | sp Q9Y4H2 IRS2_HUMAN  |
| 2218 | SPSGPVKSPPLSPVGTTPVK2000020002000000000                   | sp P50402 EMD_HUMAN   |
| 2219 | EEEEGISQESSEEEQ2002200000                                 | sp P11388 TOP2A_HUMAN |
| 2220 | KGDRSPEPGQTWTR200000000000                                | sp Q9BVC5 ASHWN_HUMAN |
| 2221 | TGSGSPFAGNSPAR2000000020000                               | sp P17096 HMGA1_HUMAN |
| 2222 | SSLGQASETEEDTVSVSK20002020000000000000                    | sp Q09666 AHNK_HUMAN  |
| 2223 | YSDSDELTVQR20000000000000                                 | sp Q9UPT8 ZC3H4_HUMAN |
| 2224 | SPSPGNHTSNSSNASNATVVPQNSSAR200200000000000000             | sp Q13435 SF3B2_HUMAN |
| 2225 | CTLPEHESPSQDISDACEAESTER2000000000000000                  | sp Q8NFC6 BD1L1_HUMAN |
| 2226 | ASGQAFELILSPR2000000002000                                | sp Q9BTA9 WAC_HUMAN   |
| 2227 | KNSTDLDSAPEDPTSPK200000000020000                          | sp Q32MZ4 LRRF1_HUMAN |
| 2228 | RLSESSALKQPATPTAAESSEGEEGEGDDGGGETESR2.000000202E+31      | sp P16949 STMN1_HUMAN |
| 2229 | SLHLSPQEQSASYQDR20000000000000                            | sp Q96RK0 CIC_HUMAN   |
| 2230 | ESPRPLQLPGAEGPAISDGEEGGGEPGAGGAAGAAGAGR2E+24              | sp Q96S55 WRIP1_HUMAN |
|      |                                                           | sp Q9H410 DSN1_HUMAN  |
|      |                                                           | sp Q6PKG0 LARP1_HUMAN |

|      |                                                   |    |        |             |
|------|---------------------------------------------------|----|--------|-------------|
| 2231 | SDSGGSSEPFDR200200000000                          | sp | P48634 | PRC2A_HUMAN |
| 2232 | SPEACCELTLQPLR20000000000000                      | sp | P06132 | DCUP_HUMAN  |
| 2233 | NSPNNISGISNPPGTPR2000000000000000                 | sp | Q9BWW4 | SSBP3_HUMAN |
| 2234 | SRTASGSSVTSLDGTR2020000000000000                  | sp | Q92597 | NDRG1_HUMAN |
| 2235 | GDQCCYSHSPPTPR2000000                             | sp | Q9NXH9 | TRM1_HUMAN  |
| 2236 | VQGEAVSNIQENTQTPTVQEESEEEEEVDGVEVK2E+29           | sp | E9PAV3 | NACAM_HUMAN |
|      |                                                   | sp | Q13765 | NACA_HUMAN  |
| 2237 | DATPPVSPINMEDQER2000200000000000                  | sp | P17275 | JUNB_HUMAN  |
| 2238 | SRSDIDVNAAGAK20000000000000                       | sp | 075122 | CLAP2_HUMAN |
| 2239 | AITSLGGGSPK2000                                   | sp | Q6KC79 | NIPBL_HUMAN |
| 2240 | HIKEEPLSEEPCTSTAIASPEK20000000000020000           | sp | Q9Y2X3 | NOP58_HUMAN |
| 2241 | SPSFASEWDEIEK200000000000                         | sp | Q92625 | ANS1A_HUMAN |
| 2242 | HASSPESPAPAPGSHR200002000000000000                | sp | Q9UQ35 | SRRM2_HUMAN |
| 2243 | ALSSDSILSPAPDAR220000200000000                    | sp | Q8IVT2 | MISP_HUMAN  |
| 2244 | QPPVSPGTALVGSQK200000000000                       | sp | P17096 | HMGA1_HUMAN |
| 2245 | SRSHTSEGAHLDITPNSGAAGNSAGPK2. 2E+23               | sp | Q92597 | NDRG1_HUMAN |
|      |                                                   | sp | P10412 | H14_HUMAN   |
| 2246 | KASGPPVSELITK200000000000                         | sp | P16403 | H12_HUMAN   |
|      |                                                   | sp | P16402 | H13_HUMAN   |
| 2247 | AAHPENSDEQDVLTKPVR2020000000000000                | sp | Q9H2Y7 | ZN106_HUMAN |
| 2248 | LDSSPSVSTLAAK22000000000000                       | sp | Q13428 | TCOF_HUMAN  |
| 2249 | TSPADHGGSVGSESGSAVDSVAGEHSVSGR2. 0000002E+30      | sp | Q5T4S7 | UBR4_HUMAN  |
| 2250 | KPVTVSPTTPTSPTGEAS2000000000                      | sp | Q9Y6G9 | DC1L1_HUMAN |
| 2251 | SGSSPDSEITELKFPSINH200200000000000000             | sp | P17812 | PYRG1_HUMAN |
| 2252 | GPSSPSTPPAAAAPAEQAPR200200000000000000            | sp | Q86VQ1 | GLCI1_HUMAN |
| 2253 | TQVLSPDSLFTAK2000000000                           | sp | P55196 | AFAD_HUMAN  |
| 2254 | ELLDTSFEDLSKPK2000000000                          | sp | P78345 | RPP38_HUMAN |
| 2255 | GDSETDLEALFNAVMPK20000000010000                   | sp | P46937 | YAP1_HUMAN  |
| 2256 | SILSPGGSCGPIK200000000000                         | sp | P78347 | GTF2I_HUMAN |
| 2257 | REESPMVDVQSPSAQDTQSIASDGTPQGEK1. 000000000002E+26 | sp | Q7Z6Z7 | HUWE1_HUMAN |
| 2258 | KSPSPAGGSSPYSR202000000200000                     | sp | Q14004 | CDK13_HUMAN |
| 2259 | KSPVFSDESDLDLDFDISK200020000000000000             | sp | 000566 | MPP10_HUMAN |
| 2260 | MYSEDKPLSSESLSESEYIEEVR2202020000000000           | sp | Q5BKY9 | F133B_HUMAN |
| 2261 | EFGDSDENEMEEHELK200000000000                      | sp | Q5F1R6 | DJC21_HUMAN |
| 2262 | ILLVDSPGMGNADDEQQEEGTSSK2E+19                     | sp | Q9UKN8 | TF3C4_HUMAN |
| 2263 | KPNAGGSPAPVR2000000                               | sp | Q3KQU3 | MA7D1_HUMAN |
| 2264 | QPATPTAAESSEGEEGEGDDGGETESR2. 00002E+22           | sp | Q96S55 | WRIP1_HUMAN |
| 2265 | HAPSPEPAVQGTGVAGVPEESGDAAIIPAK2E+27               | sp | P13051 | UNG_HUMAN   |
| 2266 | RFGDSSSDNGFSSTGTPAKPTVEK2. 202E+22                | sp | Q8IU60 | DCP2_HUMAN  |
| 2267 | TPPPPTLSPAATVGR200002000000000000                 | sp | Q8NDX5 | PHC3_HUMAN  |
| 2268 | SPSTYLHTPTSEDAAIIPSK200000000000000000            | sp | Q13111 | CAF1A_HUMAN |
| 2269 | EPTPSIASDISLPIATQELR200002000000000000            | sp | A0FGR8 | ESYT2_HUMAN |
| 2270 | SNSSSEAVLQEELSAQAK2000000000000000                | sp | Q9BXF6 | RFIP5_HUMAN |
| 2271 | SKSPPKVPIVIQDDSLPAGPPPQIR2. 02E+25                | sp | Q7Z422 | SZRD1_HUMAN |
| 2272 | SLESSVIMDR22000000                                | sp | Q9H2Y7 | ZN106_HUMAN |
| 2273 | KPEEESSESEEGSESEEEAPAGTR2. 022000202E+19          | sp | Q13428 | TCOF_HUMAN  |
| 2274 | EPTPSIASDISLPIATQELR200000002000000000            | sp | A0FGR8 | ESYT2_HUMAN |
|      |                                                   | sp | P05386 | RLA1_HUMAN  |
| 2275 | KEESEESDDMGFLFD2002000000000000                   | sp | P05387 | RLA2_HUMAN  |
|      |                                                   | sp | Q8IY81 | SPB1_HUMAN  |
| 2276 | ALDISLSSGEEDEGDEEDSTAGTTK2. 200000000002E+19      | sp | Q96T23 | RSF1_HUMAN  |
| 2277 | GRSTDEYSEADEEEEEEGKPSR2. 0032E+20                 | sp | Q9NYF8 | BCLF1_HUMAN |
| 2278 | SSATSGDIWPLSAYDNSPR2000                           | sp | Q9NYF8 | BCLF1_HUMAN |
| 2279 | LLSPQMSGEEEDSLAAK200000000000                     | sp | P42858 | HD_HUMAN    |



|      |                                                   |                       |
|------|---------------------------------------------------|-----------------------|
| 2280 | EEEEDEDFAHHSDNEQNR2000000020000000                | sp Q641Q2 FA21A_HUMAN |
| 2281 | TRSPSPTLGESLAPHK2020000000000000                  | sp Q5SNT6 FA21B_HUMAN |
| 2282 | TASQGPQTDSVIQNSENIK2000000000000000               | sp Q86UU1 PHLB1_HUMAN |
| 2283 | KLSSSSEPYEDEFNDDQSIKK2003000000000000             | sp Q9NZN5 ARHGC_HUMAN |
| 2284 | AGSFTGTSDPEAAPAR2000000000000000                  | sp Q9H4L7 SMRCD_HUMAN |
| 2285 | VNLEESSGVENSPAGARPK200000000                      | sp Q9Y4F5 C170B_HUMAN |
| 2286 | GHYEVTGSDDDETGK20000000                           | sp Q8WVM8 SCFD1_HUMAN |
| 2287 | LAALKDEPQTVPDVPSFGESPPLSPIDMDTQER2000200000000000 | sp Q09666 AHNK_HUMAN  |
| 2288 | LDADAVSPTVSQLSAVFEK2000000000000000               | sp P17535 JUND_HUMAN  |
| 2289 | KASSDSEDSSEEEEEVQGPPAK2. 22020022E+21             | sp Q96SB3 NEB2_HUMAN  |
| 2290 | NYQQNYQNSSEGEKNEGSESAPEGQAQQR2E+21                | sp Q14978 NOLC1_HUMAN |
| 2291 | ENVEYIEREESDGEYDEFGR20000000000                   | sp P67809 YBOX1_HUMAN |
| 2292 | VDIDTPDIDIHGPEGK2000000000000000                  | sp 095218 ZRAB2_HUMAN |
| 2293 | SPVPSAFSDQSR2000000000000000                      | sp Q09666 AHNK_HUMAN  |
| 2294 | KNSTDLDLAPEDPTSPK200020000002000                  | sp Q9UQ35 SRRM2_HUMAN |
| 2295 | LLGSDSEEEQK202000000                              | sp Q96RK0 CIC_HUMAN   |
| 2296 | KYSASSGGLCEEATAAK2000000000000000                 | sp Q9BW71 HIRP3_HUMAN |
| 2297 | ICTLPPSPPLASLAPVADSSTR2000000000000000            | sp Q9UHV7 MED13_HUMAN |
| 2298 | SLSDNGQPGTDPADSGGTSK2000000000000000              | sp Q9UER7 DAXX_HUMAN  |
| 2299 | MPQDGSDDDEEWPTLEK10000200000000000000             | sp 075691 UTP20_HUMAN |
| 2300 | HDSPDPSPPR200020000                               | sp Q13895 BYST_HUMAN  |
| 2301 | GEDSAEETEAKPAVVAPAVVEAVSTPSAAFPSDATAEQGPILTK2E+20 | sp Q9BRD0 BUD13_HUMAN |
| 2302 | YSPSQNSPIHHIPSR2000020000000000                   | sp Q12906 ILF3_HUMAN  |
| 2303 | ASVSGPNSPSETR20002000000                          | sp Q9NYF8 BCLF1_HUMAN |
| 2304 | SPSAMQQQDGLDR2000000000000000                     | sp 015344 TRI18_HUMAN |
| 2305 | SPQDPVGTPTIFKPKQSK20000000000000000000            | sp 060343 TBCD4_HUMAN |
| 2306 | SAGAPASVSGQDADGSTSPR2000                          | sp P46013 KI67_HUMAN  |
| 2307 | SIQDLTVGTGTEPGQVSSR2000000000000000               | sp P42679 MATK_HUMAN  |
| 2308 | SSSPGKPAVSSLNSSHRSR20000000000000000000           | sp 043318 M3K7_HUMAN  |
| 2309 | SNSPLVPPSK2000000000                              | sp Q9UHB7 AFF4_HUMAN  |
| 2310 | LASPSGSTSSGLEVVAPEGTSAPGGGPGTLDDSATICR2. 022E+34  | sp Q13247 SRSF6_HUMAN |
| 2311 | QGSITSPQANEQSVTPQR20000000000020000               | sp Q13263 TIF1B_HUMAN |
| 2312 | TNSAEVTPPVLSVMGEATPVSIEPR2. 000000002E+23         | sp Q9UQ35 SRRM2_HUMAN |
| 2313 | SPSVKSPTPK200000200000                            | sp Q6PJG2 EMSA1_HUMAN |
| 2314 | LQPSSPENSLDPFPPR2000000000000000                  | sp Q9NVD7 PARVA_HUMAN |
| 2315 | TIQNSSVSPTSSSSSSSSTGETQTQSSSR20000000000000       | sp Q8WWM7 ATX2L_HUMAN |
| 2316 | EEPLSEEPCTSTAIASPEKK200000000000200000            | sp Q7Z417 NUFP2_HUMAN |
| 2317 | LEASDCDHQQNSPTLERPGR2000000000                    | sp Q9Y2X3 NOP58_HUMAN |
| 2318 | LQQQAALSPTTAPAVSSVSK2000000000000000              | sp Q9HAN9 NMNA1_HUMAN |
| 2319 | SGLTVPTSPK2000                                    | sp Q8WXI9 P66B_HUMAN  |
| 2320 | LLEDSEESSEETVSR200000000000                       | sp Q53EL6 PDCD4_HUMAN |
| 2321 | QVSTENDSTLVHR20000000000                          | sp 060231 DHX16_HUMAN |
| 2322 | EFVEDGEVDESISDFEDMDK200200001000                  | sp 075592 MYCB2_HUMAN |
| 2323 | SPSLGSDLTFATR2000000000000000                     | sp Q9BXY0 MAK16_HUMAN |
| 2324 | SSSPELVTHLK2000000000                             | sp Q13425 SNTB2_HUMAN |
| 2325 | KLSSSSEPYEDEFNDDQSIK22200000000000000000          | sp Q07960 RHG01_HUMAN |
| 2326 | IESDEEEDFENVGK2000000000000000                    | sp Q9H4L7 SMRCD_HUMAN |
| 2327 | VPPAPVPCPPSPGPSAVPSSPK2000                        | sp Q96T23 RSF1_HUMAN  |
| 2328 | KEPAITSQNSPEAR200000                              | sp 095817 BAG3_HUMAN  |
| 2329 | KPPAPSPVQSQSPSTNWSPAVPVKK2. 000200000002E+20      | sp P23193 TCEA1_HUMAN |
| 2330 | THSTSSSLGSGESPFGR2200000000000000                 | sp Q8IYB3 SRRM1_HUMAN |
| 2331 | SPFNPSPPQDSR20000000                              | sp Q9UGV2 NDRG3_HUMAN |
| 2332 | SLGSASPGPGQPPLSSPTR20000000000020000              | sp P08651 NFIC_HUMAN  |
|      |                                                   | sp Q9C0B5 ZDHC5_HUMAN |

|      |                                                  |                       |
|------|--------------------------------------------------|-----------------------|
| 2333 | HNSASVENVSLR200000000                            | sp Q9Y4H2 IRS2_HUMAN  |
| 2334 | SPAVATSTAAPPPSSPLPSK2000000                      | sp Q14157 UBP2L_HUMAN |
| 2335 | DEETESEYDSEHENSEPVTNIR2.0020002E+20              | sp Q15154 PCM1_HUMAN  |
| 2336 | EYIPGQPPLSQSSDSSPTR20000000                      | sp P07814 SYEP_HUMAN  |
| 2337 | SQSSEGVSSLSSSPNSLETQSQSLSR2E+27                  | sp O95155 UBE4B_HUMAN |
| 2338 | AGAPGALSPSYDGGLHGLQSK2000000000000000            | sp P15923 TFE2_HUMAN  |
| 2339 | TNPEVMVVEDLSDDGK200200000                        | sp Q96GN5 CDA7L_HUMAN |
| 2340 | SQSSDTEQQSPTSGGGK2200000000000000                | sp P23588 IF4B_HUMAN  |
| 2341 | RNSLTGEEQLAR2000000000000                        | sp Q9BX95 SGPP1_HUMAN |
| 2342 | STPSHGVSSSLNSTGSLSPK2E+20                        | sp Q9UBC2 EP15R_HUMAN |
| 2343 | LGSAEQSSPDL SFLVVK2000000000000000               | sp Q96LW4 PRIPO_HUMAN |
| 2344 | DSL GDFIEHYAQLGPSSPEQLAAGAEEGGPR2000000000000000 | sp Q96QR8 PURB_HUMAN  |
| 2345 | EWYQSTIPQSPSPAPDDPEEGR20000000000000             | sp Q08499 PDE4D_HUMAN |
| 2346 | SRSPLDKDTYPPSASVVGASVGGHR2.00000002E+25          | sp Q96T37 RBM15_HUMAN |
| 2347 | TASTNNTAQR20000000000                            | sp Q9UBI6 GBG12_HUMAN |
| 2348 | SSQSPATAVPASDSPPTK200200000000000000             | sp Q3KQU3 MA7D1_HUMAN |
| 2349 | GSPATSPHLGR20002000000                           | sp Q13671 RIN1_HUMAN  |
|      |                                                  | sp P05534 1A24_HUMAN  |
|      |                                                  | sp Q09160 1A80_HUMAN  |
| 2350 | KGGSYSQAASSDSAQGSVDVSLTACK2E+20                  | sp P30447 1A23_HUMAN  |
|      |                                                  | sp P01891 1A68_HUMAN  |
|      |                                                  | sp P01892 1A02_HUMAN  |
|      |                                                  | sp P10316 1A69_HUMAN  |
| 2351 | SSDIVSSVR2000000000                              | sp Q14C86 GAPD1_HUMAN |
| 2352 | NEEDSEGSSEDEDEDGVSAAATFLK22000000000000000000    | sp B5ME19 EIFCL_HUMAN |
|      |                                                  | sp Q99613 EIF3C_HUMAN |
| 2353 | NDSVIVADQTPPTR2020000                            | sp P15336 ATF2_HUMAN  |
| 2354 | LLGPSAAADILQLSSSLPLQSR2020000000                 | sp Q7Z6Z7 HUWE1_HUMAN |
| 2355 | SLSNSNPDISGTPTSPDDEV2.00000000000002E+21         | sp Q96N67 DOCK7_HUMAN |
| 2356 | TVSPGSVSPIHGQGVVENLK2.0000002E+21                | sp Q9NZM3 ITSN2_HUMAN |
| 2357 | LSASTASELSPK2000                                 | sp Q3KQU3 MA7D1_HUMAN |
| 2358 | RPEGPGAQAPSSPR2000                               | sp P40222 TXLNA_HUMAN |
| 2359 | HASSPESPKPAPAGSHR22200000000000000000            | sp Q9UQ35 SRRM2_HUMAN |
| 2360 | KGNAEGSSDEEGLVIDEPAK2000000000000000             | sp P51858 HDGF_HUMAN  |
| 2361 | TYSDEANQMR200000000                              | sp Q9BXF6 RFIP5_HUMAN |
| 2362 | GDMSDEDDENEFFDAPEIITMPENLGHK2E+25                | sp P22059 OSBP1_HUMAN |
| 2363 | TEMDKSPFNPSPPQDSPR20000020000000                 | sp P08651 NFIC_HUMAN  |
| 2364 | ESEDKPEIEDVGSDEEEKKGDK2E+23                      | sp P07900 HS90A_HUMAN |
| 2365 | LDSPPPSPITEASEAAEAEAGNLAVSSR2.002E+20            | sp Q9C0C2 TB182_HUMAN |
| 2366 | ASAPSPNAQVACDHCLK20000000000000                  | sp Q14258 TRI25_HUMAN |
| 2367 | SPTAQSPTPSVEADSPDQK200000000000000000            | sp Q96HH9 GRAM3_HUMAN |
| 2368 | TASGSSVTSLDGTR220000000000                       | sp Q92597 NDRG1_HUMAN |
| 2369 | AASSSPGSPVASSPSR2200000000000000                 | sp Q92538 GBF1_HUMAN  |
| 2370 | DNSPPPAFKPEPPK20000000000000                     | sp Q9UDY2 ZO2_HUMAN   |
| 2371 | SQSLPTLLSPVR200000020000                         | sp P28290 SSFA2_HUMAN |
| 2372 | LSSTDDGYIDLQFK20000000000000                     | sp Q96A57 TM230_HUMAN |
| 2373 | KEQSEVSVSPR202000                                | sp Q7L4I2 RSRC2_HUMAN |
| 2374 | RGESLDNLDSPR2000000000                           | sp Q8WWI1 LMO7_HUMAN  |
| 2375 | YSPPAISPLVSEK20000000000000                      | sp Q14694 UBP10_HUMAN |
| 2376 | GVTQEVDGLSQT DGLTYFDK20000000000000              | sp Q8NB49 AT11C_HUMAN |
| 2377 | SLSNSNPDISGTPTSPDDEV200002000000000000           | sp Q96N67 DOCK7_HUMAN |
| 2378 | SLDGGSEPAVCEMCGIVGTR200000000000000000           | sp Q969R5 LMBL2_HUMAN |
| 2379 | SANQSPQSVGSSGVDSGVSTSDGLR200000000000            | sp Q14693 LPIN1_HUMAN |
| 2380 | GSAPHSEDLPEQEEIILGSDDEQEDPNDYCK2.00000000002E+26 | sp Q96SB4 SRPK1_HUMAN |

|      |                                             |    |        |             |
|------|---------------------------------------------|----|--------|-------------|
| 2381 | AQSSPASATFPVSVQEPPTKPR2E+20                 | sp | P56524 | HDAC4_HUMAN |
| 2382 | HSVTAATPPPSPTSGESGDLLSQSPSSAK2E+19          | sp | Q96QU8 | XPO6_HUMAN  |
| 2383 | GAADVEVEPEPPPGVAVSR200                      | sp | Q8NCF5 | NF2IP_HUMAN |
| 2384 | TLSPTPSAEGYQDVR20002000000000               | sp | O14639 | ABLM1_HUMAN |
| 2385 | RLSAQGGQAI SVVGLS SMSPLEEEAPQAK2E+27        | sp | Q92797 | SYMPK_HUMAN |
| 2386 | SPSGPPAMDLEGPR20000000000000                | sp | O96018 | APBA3_HUMAN |
| 2387 | LFDHPESPTPNPTEPLFLAQAEVYK200000000000000000 | sp | P49327 | FAS_HUMAN   |
| 2388 | LLSSESEDEEEFIPLAQR200200000000000000        | sp | Q96AY2 | EME1_HUMAN  |
| 2389 | DLESCSDDDNQGSK2000000000                    | sp | Q5T3I0 | GPTC4_HUMAN |
| 2390 | IADPEHDHTGFLTEYVATR300000                   | sp | P27361 | MK03_HUMAN  |
| 2391 | SVEDVRPHHTDANNQSACFEAPDQK2E+25              | sp | Q9Y520 | PRC2C_HUMAN |
| 2392 | SLKESEQESEEEILAQK20002000000000             | sp | Q9BW71 | HIRP3_HUMAN |
| 2393 | HPASLTSSGSSGSPSSSIK20000000                 | sp | Q9COD5 | TANC1_HUMAN |
| 2394 | SRSPTPPSSAGLGSNSAPPIPSR2. 020022E+22        | sp | Q8IWX8 | CHERP_HUMAN |
| 2395 | GRLTPSPDIIVLSDNEASSPR200000020000000000     | sp | Q8WXI9 | P66B_HUMAN  |
| 2396 | AASPSQSVR2000000000                         | sp | Q8IYB3 | SRRM1_HUMAN |
| 2397 | SVTSNQSDGTQESCESPDVLDLDR200000000000        | sp | Q9UGV2 | NDRG3_HUMAN |
| 2398 | STDEYSEADEEEEEEGKPSR2. 2E+21                | sp | Q96T23 | RSF1_HUMAN  |
| 2399 | GSGDTSSLIDPDTLSSELR20000000000000000000     | sp | Q9Y608 | LRRF2_HUMAN |
| 2400 | SCTPSPDQISHR20200000000                     | sp | Q7Z2W4 | ZCCHV_HUMAN |
| 2401 | GPPDFSSDEEREPTPVLGSGAAAAGR2. 00000002E+21   | sp | P42167 | LAP2B_HUMAN |
| 2402 | DSGRGDSVSDSGSDALR200000000000               | sp | P42166 | LAP2A_HUMAN |
| 2403 | DMESPTKLDVTLAK200000000000                  | sp | Q53EL6 | PDCD4_HUMAN |
| 2404 | EHYPVSSPSPSPAQPGGVSRR2200000000000000       | sp | P27816 | MAP4_HUMAN  |
| 2405 | AAVLSDSEDEEK202000000                       | sp | O75179 | ANR17_HUMAN |
| 2406 | KPGSPGSESPK2000                             | sp | Q96ST2 | IWS1_HUMAN  |
| 2407 | SGTSSPQSPVFR200000                          | sp | Q96JM3 | CHAP1_HUMAN |
| 2408 | SPCETISSPSTLESK202000000000                 | sp | Q8N556 | AFAP1_HUMAN |
| 2409 | QSPPISTSK200000000                          | sp | Q9COD5 | TANC1_HUMAN |
| 2410 | DSALAEPEGLSPAPPAR20000000                   | sp | P33981 | TTK_HUMAN   |
| 2411 | ESTQLSPADLTEGKPTDPSK20000000000000000000    | sp | Q9H9J4 | UBP42_HUMAN |
| 2412 | AHSPAEGASVSSSPGPK20000000000200000          | sp | Q08J23 | NSUN2_HUMAN |
| 2413 | AMDNHSDEEELAAFQQLDDSTVAR1. 000202E+25       | sp | Q8NFG4 | FLCN_HUMAN  |
| 2414 | KDSSGSISEQLPCR20000000000000                | sp | Q86VR2 | F134C_HUMAN |
| 2415 | LAPVSPPEPQKAPVSPESVK20000000002000000       | sp | Q8NEZ4 | KMT2C_HUMAN |
| 2416 | KPISDNSFSSDEEQSTGPIK2022000000000000        | sp | Q96JM3 | CHAP1_HUMAN |
| 2417 | LPSTSGSEGVFR2000000000                      | sp | O60293 | ZC3H1_HUMAN |
| 2418 | SAYQEYSDSDVPEELKR202000000000               | sp | P29317 | EPHA2_HUMAN |
| 2419 | SYLEGSSDNQLKDESTEPVDDR220000000000000000    | sp | Q96JG6 | CC132_HUMAN |
| 2420 | VAASPKSPTAALNESLVECPK20000200000000000000   | sp | Q9UHI6 | DDX20_HUMAN |
| 2421 | QGEDLAHVQHPTGAGPHAQEEDSQEEEEDEEAASR2E+25    | sp | Q53EZ4 | CEP55_HUMAN |
| 2422 | YLLGDAPVSPSSQK2000000                       | sp | Q9NW97 | TMM51_HUMAN |
| 2423 | GKSSPICSTTGDDK200000000000                  | sp | Q9NYB0 | TE2IP_HUMAN |
| 2424 | VLGSEGEEDEALSPAK2000000000000000            | sp | Q12802 | AKP13_HUMAN |
| 2425 | LGVSVSPSR2020000                            | sp | P18858 | DNLI1_HUMAN |
| 2426 | AKPVVSDFDSEEQDER20002000000000              | sp | Q86VM9 | ZCH18_HUMAN |
| 2427 | HQQSDLSAACSDADLHR2002000200000000           | sp | P51531 | SMCA2_HUMAN |
| 2428 | GGSYSQAASSDSAQGSVSLTACK2000000000000000     | sp | Q9H9J4 | UBP42_HUMAN |
|      |                                             | sp | P05534 | 1A24_HUMAN  |
|      |                                             | sp | P30447 | 1A23_HUMAN  |
|      |                                             | sp | P01891 | 1A68_HUMAN  |
|      |                                             | sp | P01892 | 1A02_HUMAN  |
|      |                                             | sp | Q09160 | 1A80_HUMAN  |
|      |                                             | sp | P10316 | 1A69_HUMAN  |

|      |                                                        |                       |
|------|--------------------------------------------------------|-----------------------|
| 2429 | NVRSDISDQEEDSEEGCPVSINLSK2. 002E+23                    | sp Q15154 PCM1_HUMAN  |
| 2430 | AAAAAATAPPSPGPAQPGPR20000000000                        | sp Q6SPF0 SAMD1_HUMAN |
| 2431 | NVPHEICEDSDIDGDIR200000000                             | sp 000629 IMA3_HUMAN  |
| 2432 | GSAPHSESDLPEQEEELGSDDDDEQEDPNDYCK2. 02000000000002E+28 | sp Q96SB4 SRPK1_HUMAN |
| 2433 | MYSEDKPLSSESLSESEYIEEVR1. 0000000220202E+23            | sp Q5BKY9 F133B_HUMAN |
| 2434 | ALSSDSILSPAPDAR200000000                               | sp Q8IVT2 MISP_HUMAN  |
|      |                                                        | sp 015320 CTGE5_HUMAN |
|      |                                                        | sp A4D2H0 CTGEF_HUMAN |
|      |                                                        | sp Q86UF2 CTGE6_HUMAN |
| 2435 | SNSELEDEILCLEK2000000000000                            | sp P0CG41 CTGE8_HUMAN |
|      |                                                        | sp A4FU28 CTGE9_HUMAN |
|      |                                                        | sp Q8IX94 CTGE4_HUMAN |
| 2436 | DPSASPGDAGEQAIR200000000000000                         | sp P18206 VINC_HUMAN  |
| 2437 | LPSDEDESGTEESDNTPLK2000020000000000000                 | sp Q9ULH0 KDIS_HUMAN  |
| 2438 | GDPRLSPDPVAGSAVSQELR20000000000000000                  | sp Q9BUR4 WAP53_HUMAN |
| 2439 | DVDDGSGSPHSPHQLSSK200000000                            | sp Q9H4A3 WNK1_HUMAN  |
| 2440 | ASGQAFELILSPR200000000000000                           | sp P16949 STMN1_HUMAN |
| 2441 | ELSESEDEELQLEEFMPLK2002000000000000000                 | sp Q99543 DNJC2_HUMAN |
| 2442 | ASPSTAGETPSGVK200000000000000                          | sp Q9UI10 EI2BD_HUMAN |
| 2443 | DSQQLINIPSLNDSSEIEDISEIESNR2. 0002E+19                 | sp Q9UDY2 ZO2_HUMAN   |
| 2444 | MESEGGADDSAEGLDLDNEDR1. 020000002E+25                  | sp P07910 HNRPC_HUMAN |
| 2445 | SELSQDAEPAGSQETK200000000000000                        | sp Q9BVJ6 UT14A_HUMAN |
| 2446 | RPQSPGASPSQAER200020000000                             | sp Q96T58 MINT_HUMAN  |
| 2447 | ELVGDGTSQEGDHEPSGSETEEDTSSSPHR20202000000000000        | sp P0DJ93 SIM13_HUMAN |
| 2448 | QGSITSPQANEQSVTPQR20000000020000                       | sp Q9UQ35 SRRM2_HUMAN |
| 2449 | SRSPLDKDYPPSASVVGASVGGHR2. 02E+25                      | sp Q96T37 RBM15_HUMAN |
| 2450 | EFVEDGEVDESISDFEDMDK200200000000                       | sp Q9BXY0 MAK16_HUMAN |
| 2451 | KSSTVATLQGTPDHGDPR20000000000000000                    | sp Q8IVT2 MISP_HUMAN  |
| 2452 | VSIGNITLSPAIR2000000                                   | sp Q0JRZ9 FCHO2_HUMAN |
| 2453 | SNSTTQVSQPR200000000                                   | sp Q9UPN4 CP131_HUMAN |
| 2454 | HNFLFEDNMALPSESVSSLTDLKPPTGSNQASPAR2. 02E+21           | sp Q9BZQ8 NIBAN_HUMAN |
| 2455 | DSAI PVESDTDDEGAPR20000000000                          | sp Q96D46 NMD3_HUMAN  |
| 2456 | SQSLPTLLSPVR202000000000000                            | sp P28290 SSFA2_HUMAN |
| 2457 | GPSQEEEDNHSDEEDRASEP200000020000                       | sp Q86VM9 ZCH18_HUMAN |
| 2458 | TPSSQNLALLAR2000000000000                              | sp 075385 ULK1_HUMAN  |
| 2459 | DSELSDTDSGCCLGQSESDK2. 0000002E+19                     | sp Q96T88 UHRF1_HUMAN |
| 2460 | DLDEEGSEKELHENVLDK2000000000000                        | sp 043719 HTSF1_HUMAN |
| 2461 | NAPAAVDEGSI SPR202000                                  | sp P28715 ERCC5_HUMAN |
| 2462 | RESEKLENETLNK2002000000000                             | sp P23588 IF4B_HUMAN  |
| 2463 | AGVRPSSSGSAWEACSEAPSK20000000000000000                 | sp Q12789 TF3C1_HUMAN |
| 2464 | TLSTHSVPNISGATCSAFASPFGCPYSHR2. 02E+29                 | sp P28290 SSFA2_HUMAN |
| 2465 | NSPLDCGSASP20000                                       | sp 075179 ANR17_HUMAN |
| 2466 | LLSSNEDDANILSSPTDR2000000000200000                     | sp 075448 MED24_HUMAN |
| 2467 | SPSPPTQHTGQPPGQPSAPLSAPR2. 02E+26                      | sp Q68EM7 RHG17_HUMAN |
| 2468 | LNETELTDLEGQESPPK20000                                 | sp Q9ULF5 S39AA_HUMAN |
| 2469 | DVDDGSGSPHSPHQLSSK2002000000000                        | sp Q9H4A3 WNK1_HUMAN  |
| 2470 | TSPADHGGVSGSESGSAVDSVAGEHSVSGR2. 0000002002E+30        | sp Q5T4S7 UBR4_HUMAN  |
| 2471 | EHYPVSSPSSPPAQP GGVSRR2002000000000000000              | sp 075179 ANR17_HUMAN |
| 2472 | DTSATSQVNGSPQAEQPSLESTSK20000000000000000              | sp Q86WB0 NIPA_HUMAN  |
| 2473 | DKSPSSLLEDAK2000000000000                              | sp P42684 ABL2_HUMAN  |
| 2474 | QLSESESSLEMDDER20000000000000000                       | sp Q16204 CCDC6_HUMAN |
| 2475 | EVSSRPSTPGLSVVSGISATSEIPNK2. 0002E+20                  | sp Q14C86 GAPD1_HUMAN |
| 2476 | VLDEEGSER2000                                          | sp 043719 HTSF1_HUMAN |

|      |                                                |                       |
|------|------------------------------------------------|-----------------------|
| 2477 | AGGLDWPEATEVSPSR20000                          | sp Q9Y446 PKP3_HUMAN  |
| 2478 | GNKSPSPDGS PAATPEIR20000002000000000           | sp 000499 BIN1_HUMAN  |
| 2479 | ALSPGLEESGLGLLAR200000000000000                | sp 015417 TNC18_HUMAN |
| 2480 | TSSGTSLSAMHSSGSSGK2020000000000000             | sp Q12888 TP53B_HUMAN |
| 2481 | NHSNAQFIESYVCR200000000000000                  | sp P41229 KDM5C_HUMAN |
| 2482 | SLPVSVPVWGFK200000000000000                    | sp Q96B36 AKTS1_HUMAN |
| 2483 | DTSPSSGSAVSSSK2000000000000000                 | sp Q8NEY8 PPHLN_HUMAN |
| 2484 | TGSNISGASSDISLDEQYK2000000000000000            | sp P22059 OSBP1_HUMAN |
| 2485 | EDENDASDEDDDEKR20000000000                     | sp Q9Y5B6 PAXB1_HUMAN |
| 2486 | ASLGSLEGEAEAEASSPK20000000000002000            | sp Q09666 AHNK_HUMAN  |
| 2487 | ETPHSPGVEDAPIAK200000000000000                 | sp Q9UHB6 LIMA1_HUMAN |
| 2488 | KPPAPSPVQSQSPSTNWS PAVPK2. 000202000002E+19    | sp Q8IYB3 SRRM1_HUMAN |
| 2489 | GHHVTDSENDEPLNLNASDSESEELHR2. 000000000202E+21 | sp Q96ST2 IWS1_HUMAN  |
| 2490 | GNDPLTSSPGR20000                               | sp P49736 MCM2_HUMAN  |
| 2491 | TTQSMQDFPVVDSEEEAEFEFK200000000000             | sp Q9UBB9 TFP11_HUMAN |
| 2492 | VISDSESDIGGSDVEFKPDK200000020000000000         | sp P52701 MSH6_HUMAN  |
| 2493 | DKEEIFGSDADSEDDADSDEDR20002000002000000        | sp Q8N7H5 PAF1_HUMAN  |
| 2494 | SDSASSEPVGIYQGF EK220000000000000              | sp Q05655 KPCD_HUMAN  |
| 2495 | TMFAQVESDDEEAK20000000                         | sp Q9NW82 WDR70_HUMAN |
| 2496 | QSVVYGGKSTIRDR2200000                          | sp Q8WWY3 PRP31_HUMAN |
| 2497 | SSEGGVGVGPGGGDEPPTS PR2000                     | sp Q9Y4H2 IRS2_HUMAN  |
| 2498 | IAAPELHKGDS DSEDEPTK20200000000                | sp Q92733 PRCC_HUMAN  |
| 2499 | VQDTSNTGLGEDI IHQLSK200000000000000000         | sp Q8IWA0 WDR75_HUMAN |
| 2500 | ALSSLHGDDQDSEDEVLTIPEVK200000000000000         | sp P11717 MPRI_HUMAN  |
| 2501 | LKSVEDEMDSPGEEPFTGQGR2. 0000002E+20            | sp Q12857 NFIA_HUMAN  |
| 2502 | TPSSPLQSCTPSLS PR20000000000002000             | sp Q96AP0 ACD_HUMAN   |
| 2503 | RGSQKSTDSPGADAELPESAAR2020000000000000         | sp Q9Y4K1 AIM1_HUMAN  |
| 2504 | LESSEGEI IQTVDR200000000000                    | sp Q99590 SCAFB_HUMAN |
| 2505 | TGVTSTSDSEEGDDQEGEK200020000000000000          | sp 075475 PSIP1_HUMAN |
| 2506 | TSPTVATQTGASATSTR200000000000000000            | sp Q6P1L5 F117B_HUMAN |
| 2507 | SPPGSGASTPVGPWDQAVQR200000000000000000         | sp Q8TE77 SSH3_HUMAN  |
| 2508 | SNSQTLSDAPFTTCPEGPAR200000000000000000         | sp Q8IZW8 TENS4_HUMAN |
| 2509 | ADAPDAGAQS DSELPSYHQNDVSLDR200000000000000000  | sp Q92538 GBF1_HUMAN  |
| 2510 | SPESDSQSPEFESQSPR200200000000002000            | sp Q9H5H4 ZN768_HUMAN |
| 2511 | AEELSPAALSPSLEPIR20000200000000                | sp Q12774 ARHG5_HUMAN |
| 2512 | LPSPTSPFSSLSQDQAATSK2020000000000000000        | sp Q8WWI1 LM07_HUMAN  |
| 2513 | SGSALLQSQSSTEDPKDEPAELKPDSEDLSSQSSASK2E+26     | sp Q5VTR2 BRE1A_HUMAN |
| 2514 | METADAPSPAPSLGER100000002000200000             | sp Q12873 CHD3_HUMAN  |
| 2515 | EFVSSDESSGENK220022000000                      | sp Q08945 SSRP1_HUMAN |
|      |                                                | sp P05534 1A24_HUMAN  |
|      |                                                | sp P30447 1A23_HUMAN  |
| 2516 | KGGSYSQAASSDSAQSDVSLTACK20002000000000         | sp P01891 1A68_HUMAN  |
|      |                                                | sp P01892 1A02_HUMAN  |
|      |                                                | sp Q09160 1A80_HUMAN  |
|      |                                                | sp P10316 1A69_HUMAN  |
| 2517 | RDSGDNSAPSGQER200000000000000                  | sp Q8IXQ3 CI040_HUMAN |
| 2518 | FDSSLSSDDETK20022000000                        | sp P28715 ERCC5_HUMAN |
| 2519 | QEEESPVERPLK200000000                          | sp Q96SB4 SRPK1_HUMAN |
| 2520 | SPSPDGS PAATPEIR20000002000000000              | sp 000499 BIN1_HUMAN  |
| 2521 | ATNESEDEIPQLVPIGK200000000000000000            | sp 076021 RL1D1_HUMAN |
| 2522 | SGSSQELDVKPSASPQER2020000000000200000          | sp Q9UQ35 SRRM2_HUMAN |
| 2523 | SEDGVEGDLGETQSR200000000000000000              | sp Q09666 AHNK_HUMAN  |
| 2524 | AVSPPHLDGPPSPR2000000002000                    | sp P29590 PML_HUMAN   |
| 2525 | GLLAQGLRPESPPPAGPLLNGAPAGESPQPK2E+21           | sp Q96TA1 NIBL1_HUMAN |

|      |                                                  |    |        |              |
|------|--------------------------------------------------|----|--------|--------------|
| 2526 | FQETEFLSPPR20000                                 | sp | P42166 | LAP2A_HUMAN  |
| 2527 | SQDQDSEVNELSR200                                 | sp | Q86VM9 | ZCH18_HUMAN  |
| 2528 | SPSFGEDYYGPSR20200000000200                      | sp | P49761 | CLK3_HUMAN   |
| 2529 | SKSPNNEGDVHFSR200000000000                       | sp | Q8NAP3 | ZBT38_HUMAN  |
| 2530 | KKEPAITSQNSPEAR200000                            | sp | P23193 | TCEA1_HUMAN  |
| 2531 | EKTPELPEPSVK20000000000                          | sp | Q8IYB3 | SRRM1_HUMAN  |
| 2532 | AWLDEDSNLSPSPLR2000020000                        | sp | Q9C086 | IN80B_HUMAN  |
| 2533 | GRLTPSPDIIVLSDNEASSPR2000000002000000000         | sp | Q8WXI9 | P66B_HUMAN   |
| 2534 | TASGSSVTSLDGTR2020000000                         | sp | Q92597 | NDRG1_HUMAN  |
| 2535 | ALDISLSSGEEDEGDEEDSTAGTTKQPSK2. 2E+23            | sp | Q8IY81 | SPB1_HUMAN   |
| 2536 | MESHSEDEDLAGAVGGLGWSNR2. 02E+20                  | sp | Q96MH2 | HEX12_HUMAN  |
| 2537 | DLSPIDLNSAAK200000000000                         | sp | Q9P2B4 | CT2NL_HUMAN  |
| 2538 | KRESESEDETTPAAPQLIK2020000000000000000           | sp | 060832 | DKC1_HUMAN   |
| 2539 | SDSQASLTVPLSPQVVR2002000002000000                | sp | Q8TEV9 | SMCR8_HUMAN  |
| 2540 | VQQEIDSDSPVAR200000000                           | sp | Q6T4R5 | NHS_HUMAN    |
| 2541 | QPTPPSEAAASK20000000000                          | sp | Q86UP2 | KTN1_HUMAN   |
| 2542 | GAAAADLLSSSPESQHGGTQSPGGGQPLLQPTK2E+24           | sp | Q9H3S7 | PTN23_HUMAN  |
| 2543 | LDTGSPEPETR20000000                              | sp | Q9Y2F5 | ICE1_HUMAN   |
| 2544 | VISDSESDIGGSDVEFKPDTK202000020000000000          | sp | P52701 | MSH6_HUMAN   |
| 2545 | DSGSQVEEDTSCSDSK20000000000000                   | sp | Q08499 | PDE4D_HUMAN  |
| 2546 | SRSPLDKDITYPPSASVVGASVGGHR2. 000000003E+25       | sp | Q96T37 | RBM15_HUMAN  |
| 2547 | SVSNGTAKPATSENFDEDLK2. 00002E+20                 | sp | Q96K49 | TM87B_HUMAN  |
| 2548 | GLMAGGRPEGQYSEDEDTDDEYK1. 000000002E+22          | sp | Q9NPQ8 | RIC8A_HUMAN  |
| 2549 | SGGLQTPECLSR20000000                             | sp | P85037 | FO XK1_HUMAN |
| 2550 | KPSDSL SVASSR22000                               | sp | Q5T0W9 | FA83B_HUMAN  |
| 2551 | TSPADHGGSVGSESGSAVDSVAGEHSVSGR2. 20000002002E+31 | sp | Q5T4S7 | UBR4_HUMAN   |
| 2552 | APTLAELDSSESEEETLHK220200000000                  | sp | Q08AE8 | SPIR1_HUMAN  |
| 2553 | LYADSDSGDSDKR20200000000                         | sp | 043896 | KIF1C_HUMAN  |
| 2554 | ENSFGPSLEFR2000000                               | sp | Q9UQ35 | SRRM2_HUMAN  |
| 2555 | LPLSPPLVEDSAFEPSPR2000000000000000               | sp | 096007 | MOC2B_HUMAN  |
| 2556 | YSDGDKSDDLVDVSNEDPATPR3. 0000002E+24             | sp | Q04726 | TLE3_HUMAN   |
| 2557 | LRSPEALVQGR20000000000                           | sp | Q9UHB6 | LIMA1_HUMAN  |
| 2558 | TDGSISGDRQPVTVADYISR2. 00002E+20                 | sp | P51116 | FXR2_HUMAN   |
| 2559 | SSGDPEQIKEDSLSEESADAR20200200000                 | sp | Q9BVS4 | RIOK2_HUMAN  |
| 2560 | RPTETNPVTSNSDEECNETVK2. 000000002E+19            | sp | P46100 | ATRX_HUMAN   |
| 2561 | QGSITSPQANEQSVTPQR200000000020000                | sp | Q9UQ35 | SRRM2_HUMAN  |
| 2562 | KPPAPSPVQSQSPSTNWSPAVPVK2. 000002020002E+19      | sp | Q8IYB3 | SRRM1_HUMAN  |
| 2563 | QSPASPPPLGGAPVR2002000000000000                  | sp | Q14160 | SCRIB_HUMAN  |
| 2564 | SVA AEGALLPQTPPSR2002000                         | sp | Q86X27 | RGPS2_HUMAN  |
| 2565 | AEAPAGPALGLPSPEAESGVDR20000000000                | sp | Q53F19 | CQ085_HUMAN  |
| 2566 | EHYPVSSPSSPPAQP GGVS R2000200000000000000        | sp | 075179 | ANR17_HUMAN  |
| 2567 | LSPLPPGSPGSAAR20000020000000                     | sp | Q6ZN18 | AEBP2_HUMAN  |
| 2568 | ATLLNVPDLSDSIHSANASER20002000                    | sp | Q07157 | ZO1_HUMAN    |
| 2569 | VSGSPEQAVEENLSSYSLDR2000000000000000000          | sp | Q9Y6A5 | TACC3_HUMAN  |
| 2570 | TDDTSGEDNDEKEAVASK2000200000000000000            | sp | Q9Y618 | NCOR2_HUMAN  |
| 2571 | QEQINTEPLEDTVLSPTK200                            | sp | 015446 | RPA34_HUMAN  |
| 2572 | SFSLASSNSPISQR20000000000000000                  | sp | Q9BXB4 | OSB11_HUMAN  |
| 2573 | KHGLAHDEMKS PR2000                               | sp | Q9Y2W1 | TR150_HUMAN  |
| 2574 | EGEETEGSEEDDKENDKTEEMPNDVLENK2. 002E+26          | sp | P49321 | NASP_HUMAN   |
| 2575 | SLSPGGAALGYR20200000000000                       | sp | Q96T37 | RBM15_HUMAN  |
| 2576 | SRSVSPCSNVESR20202000000000                      | sp | Q9UQ35 | SRRM2_HUMAN  |
| 2577 | SESTD SLGGLSPSEVTAIQCK2000000000000000000        | sp | 060318 | GANP_HUMAN   |
| 2578 | DSHSSEDEASSQTDLSQTISK2. 2000002E+19              | sp | Q5JTV8 | TOIP1_HUMAN  |
| 2579 | SYSSPDITQAIQEEEK2000000000000000                 | sp | P40818 | UBP8_HUMAN   |

|      |                                                    |    |        |              |
|------|----------------------------------------------------|----|--------|--------------|
| 2580 | IVEYSPPSAPR20000000                                | sp | 095696 | BRD1_HUMAN   |
| 2581 | KPSDSLVSASSR20000                                  | sp | Q5T0W9 | FA83B_HUMAN  |
| 2582 | AGLESGAEPGDGSDTTKK2000000                          | sp | 060832 | DKC1_HUMAN   |
| 2583 | GSPQSAEELSSGLLASAAASSR2E+19                        | sp | Q12948 | FOXC1_HUMAN  |
| 2584 | AESSDSGAEESEEEEAQEEVK2000002000000000000           | sp | Q5T8D3 | ACBD5_HUMAN  |
| 2585 | VTETEDDSDSDDDEDDVHVTIGDIK2. 000202E+24             | sp | Q6UN15 | FIP1_HUMAN   |
| 2586 | SSSVLSLEGSEK20020000000                            | sp | A1L390 | PKHG3_HUMAN  |
| 2587 | SLDSESDDSK202000000000                             | sp | Q13185 | CBX3_HUMAN   |
| 2588 | ELKSDASSDQGPASPEK200220000020000                   | sp | Q6BDS2 | URFB1_HUMAN  |
| 2589 | TSSTCSNESLSVGGTSVTPR20020000000000000              | sp | 060343 | TBCD4_HUMAN  |
| 2590 | SPTGPSNSFLANMGTVAHK2000000000000000000             | sp | Q96I25 | SPF45_HUMAN  |
| 2591 | SSTPLPTISSAENTR2200000000000000000                 | sp | P42167 | LAP2B_HUMAN  |
| 2592 | TCNSPQNSTDSVSDIVPDSPPFGALGSDTR2. 0202E+22          | sp | P42166 | LAP2A_HUMAN  |
| 2593 | TVANLLSGKSPR2000                                   | sp | Q14694 | UBP10_HUMAN  |
| 2594 | QHLYSSEDEPDDNPDVLSR3002000000000000000             | sp | Q13428 | TCOF_HUMAN   |
| 2595 | RLSSASTGKPLSVEDDFEK2200000000000000000             | sp | Q8NFC6 | BD1L1_HUMAN  |
| 2596 | LFEDDSNEK20000                                     | sp | 075152 | ZC11A_HUMAN  |
| 2597 | RLSYNTASNK200000000                                | sp | 043719 | HTSF1_HUMAN  |
| 2598 | KPSTDEQTSSAEEDVPTCGYLNLSNSR2. 22E+21               | sp | P49207 | RL34_HUMAN   |
| 2599 | SGSIVELIAGGGSSCSPVLSR2E+19                         | sp | Q8N556 | AFAP1_HUMAN  |
| 2600 | VSSPLPSPSAMTDAANSQAAAK2. 0002E+20                  | sp | P42858 | HD_HUMAN     |
| 2601 | TLDVSTDEEDKIHSSSEK2200000000000000000              | sp | Q8WXI9 | P66B_HUMAN   |
| 2602 | LASPSGSTSSGLEVVAPEGTSAPGGGPGTLDDSATICR2. 0202E+36  | sp | P16383 | GCFC2_HUMAN  |
| 2603 | GSVSPSTPSPKPTGIFQTSANSSFEVK2. 002202E+27           | sp | Q13263 | TIF1B_HUMAN  |
| 2604 | MHNLHGTKPPPSEGSDEEEEEDEEDEEER1. 00000000000002E+30 | sp | 015027 | SC16A_HUMAN  |
| 2605 | GSPEEELPLPAFEK200000000000000                      | sp | Q9BQ67 | GRWD1_HUMAN  |
| 2606 | AGSCCLSPGGR200000                                  | sp | Q5JTD0 | TJAP1_HUMAN  |
| 2607 | KGSDDAPYSPTAR200000200000                          | sp | Q969V6 | MKL1_HUMAN   |
| 2608 | ASPSQPSSQPLQIHR2000000000000000000                 | sp | 075151 | PHF2_HUMAN   |
| 2609 | VLSSTSEDEPGVVK202200000000000                      | sp | Q9HC35 | EMAL4_HUMAN  |
| 2610 | SMVSPVSPSTGTISVPNSCPASPR2. 002E+24                 | sp | Q8NI08 | NCOA7_HUMAN  |
| 2611 | NYQQNYQNSSESGEKNEGSESAPEGQAQR3. 00002E+24          | sp | P85037 | FO XK1_HUMAN |
| 2612 | EVSSRPSTPGLSVVSGISATSEDI PNK2E+21                  | sp | P67809 | YBOX1_HUMAN  |
| 2613 | RNSSPVPSPASVPGQR202000000000000                    | sp | Q14C86 | GAPD1_HUMAN  |
| 2614 | ISPLSSPCSSPLQGTPASSLVSK2E+22                       | sp | Q9H1B7 | I2BPL_HUMAN  |
| 2615 | KSPSGPVKSPPLSPVGTTPVK2. 0000002E+20                | sp | Q14432 | PDE3A_HUMAN  |
| 2616 | QDDSPSGASYGQDYDLSPSR200000000000020000             | sp | Q9BVC5 | ASHWN_HUMAN  |
| 2617 | ASLEAAIADAEQR200000000000000                       | sp | Q9NYV4 | CDK12_HUMAN  |
| 2618 | EGDPVSLSTPLETEFGSPSELSR2000                        | sp | P05787 | K2C8_HUMAN   |
| 2619 | RVESEESGDEEGKK200200000000                         | sp | Q9BUR4 | WAP53_HUMAN  |
| 2620 | GNKSPSPDGSPAATPEIR20200000000000000                | sp | Q15435 | PP1R7_HUMAN  |
| 2621 | VNSNGKESPGSSEFFQEA VSHGK20020000000000000          | sp | 000499 | BIN1_HUMAN   |
| 2622 | RLSSTSLASGHSVR220000000000000                      | sp | Q8N108 | MIER1_HUMAN  |
| 2623 | SLDMSIIAEVK200000000000000                         | sp | Q9BZL6 | KPCD2_HUMAN  |
| 2624 | TGSNISGASSDISLDEQYK20000000000000000               | sp | P05787 | K2C8_HUMAN   |
| 2625 | EPAITSQNSPEAR200000                                | sp | P22059 | OSBP1_HUMAN  |
| 2626 | GGHSSVSTESESSSFHSS20000000000000000                | sp | P23193 | TCEA1_HUMAN  |
| 2627 | KLSSSEPYEDEFNDDQSIK2. 22E+19                       | sp | P61073 | CXCR4_HUMAN  |
| 2628 | GPKPEPPGSGSPAPPR2000000                            | sp | Q9H4L7 | SMRCD_HUMAN  |
| 2629 | TLEEVMAEEDEGTPRGSPA2000                            | sp | Q9UKJ3 | GPTC8_HUMAN  |
| 2630 | SSGTASSVAFTPLQGLEIVNPQAAEK2. 0000020002E+26        | sp | A6NKF1 | SAC31_HUMAN  |
| 2631 | LNHVAAGLVSPSLKSDTSSK200002000000                   | sp | Q8WWY3 | PRP31_HUMAN  |
| 2632 | LIRPEYAWIVQPVSGAVYDRPGASPK2000                     | sp | Q05519 | SRS11_HUMAN  |
|      |                                                    | sp | Q12769 | NU160_HUMAN  |

|      |                                             |                       |
|------|---------------------------------------------|-----------------------|
| 2633 | SPSSDSWTCADTSTER2000000000000000            | sp Q8N6T3 ARFG1_HUMAN |
| 2634 | SQSSGSSATHPIISVPGAR2000000000000000         | sp Q9Y4H2 IRS2_HUMAN  |
| 2635 | LEKEEEEGISQESSEEEQ2002200000                | sp P17096 HMGA1_HUMAN |
| 2636 | HSPIAPSSPSPQVLAQK2000000000000000           | sp Q9NQS7 INCE_HUMAN  |
| 2637 | IQPLEPDSPTGLSENPTATEK2000000000000000       | sp Q9ULJ3 ZBT21_HUMAN |
| 2638 | SLHSAHSLASR200000000000                     | sp O15027 SC16A_HUMAN |
| 2639 | RPDPDSDEDEDYER2000000000                    | sp Q96I25 SPF45_HUMAN |
| 2640 | SATRPSPSPERSSTGPEPPAPTPLLAER2.020002E+23    | sp Q9UQ35 SRRM2_HUMAN |
| 2641 | SLSSGSNFCSEK200000000000                    | sp O95243 MBD4_HUMAN  |
| 2642 | NTPSQHSHSIQHSPER20000                       | sp Q9NYF8 BCLF1_HUMAN |
| 2643 | RPACDPEPGESGSSSDEGCTVVRPEK2022200000000000  | sp O15541 R113A_HUMAN |
|      |                                             | sp P05534 1A24_HUMAN  |
|      |                                             | sp P30447 1A23_HUMAN  |
| 2644 | GGSYSQAASSDSAQGSVSLTACK2E+20                | sp P01891 1A68_HUMAN  |
|      |                                             | sp P01892 1A02_HUMAN  |
|      |                                             | sp Q09160 1A80_HUMAN  |
|      |                                             | sp P10316 1A69_HUMAN  |
| 2645 | CSGPGLSPGMVR2000000                         | sp P21333 FLNA_HUMAN  |
| 2646 | EQGTESRSSTPLPTISSAENTR2200000000000000      | sp P42167 LAP2B_HUMAN |
|      |                                             | sp P42166 LAP2A_HUMAN |
| 2647 | ESDQTLAALLSPK2000                           | sp P18583 SON_HUMAN   |
| 2648 | KSSISSISGR200200000                         | sp Q86SQ0 PHLB2_HUMAN |
| 2649 | DGEQSPNVSLMQR2000000000                     | sp Q58WW2 DCAF6_HUMAN |
| 2650 | GYSPYSVSGSGSTAGSR200                        | sp Q15149 PLEC_HUMAN  |
| 2651 | KAPAGQEEPPTPSSPLSAEQDR2000200000000000      | sp P13051 UNG_HUMAN   |
| 2652 | QLPALDGSLMGPEPPAQEEAPVSPHK2000000000000000  | sp Q8N9T8 KRI1_HUMAN  |
| 2653 | SPSPPTQHTGQPPGQPSAPQLSAPR2.002E+21          | sp Q68EM7 RHG17_HUMAN |
| 2654 | GGRSPDEVTLTSIVPTR2000000000000000           | sp Q9UKS6 PACN3_HUMAN |
| 2655 | VIGQDHFSESEEEAPAEASSGALR2002000000000000000 | sp P23497 SP100_HUMAN |
| 2656 | RLSPSSAASSYSFSDLNSTR20000000000000000000    | sp P50402 EMD_HUMAN   |
| 2657 | TSAQHALTSVSR200                             | sp P61073 CXCR4_HUMAN |
| 2658 | RQEIESDSESDGELQDR2020200000000              | sp Q9BYW2 SETD2_HUMAN |
| 2659 | ELSESVQQQSTPVPLISPK2000                     | sp Q9ULU4 PKCB1_HUMAN |
| 2660 | KQSVFSAPSLSAGASAAEPLDR2000000000000000      | sp Q14573 ITPR3_HUMAN |
| 2661 | LFSQQQDVSNK2000000000                       | sp P55196 AFAD_HUMAN  |
| 2662 | SQTTTERDSDTDVEEEELPVENR2020000000000000     | sp Q14676 MDC1_HUMAN  |
| 2663 | TAANKSPCETISSPSSTLESK2000000000000000       | sp Q9COD5 TANC1_HUMAN |
| 2664 | SPGSTPTTPTSSQAPQK2200000000000000           | sp P35658 NU214_HUMAN |
| 2665 | NEIIQSPISQVPSVEK200000000000                | sp Q7Z3T8 ZFY16_HUMAN |
| 2666 | QPATPTAAESSEGEEGEGDDGGETESR2.0002E+22       | sp Q96S55 WRIP1_HUMAN |
| 2667 | EISDDEAEEK2000000000                        | sp P08238 HS90B_HUMAN |
|      |                                             | sp Q58FF7 H90B3_HUMAN |
| 2668 | AAPPPPPPPPLESSPR2000                        | sp Q5T4S7 UBR4_HUMAN  |
| 2669 | NSLTGEEQLAR200000000000                     | sp Q9BX95 SGPP1_HUMAN |
| 2670 | VSPAGGLDDKPK200000000000                    | sp Q8WY36 BBX_HUMAN   |
| 2671 | ESAAPASPAPSPAPSTPAPPQK200000002000000000    | sp Q3KQU3 MA7D1_HUMAN |
| 2672 | NVSTGSAENEEK2002000000                      | sp O60271 JIP4_HUMAN  |
| 2673 | SRTGSESSQTGTSTTSSR2020000000000000          | sp P23588 IF4B_HUMAN  |
| 2674 | ENPPVEDSDEDDKR2000000000                    | sp Q8TCJ2 STT3B_HUMAN |
| 2675 | TQTPPVSPAPQPTTEER2000000000                 | sp Q14247 SRC8_HUMAN  |
| 2676 | SPPTMLLPASPAK200000000020000                | sp Q9UGU5 HMGX4_HUMAN |
| 2677 | FSLSPSLGPQASR202000000000                   | sp Q9NYF3 FA53C_HUMAN |
| 2678 | ESEDELEEANGNNPIDIEVDQNK2E+22                | sp Q9UKL0 RCOR1_HUMAN |
| 2679 | NNTAAETEDDESDEDR200002000000                | sp Q6KC79 NIPBL_HUMAN |



|      |                                                    |                       |
|------|----------------------------------------------------|-----------------------|
| 2680 | ADEPSSEESDLEIDK20000000                            | sp P50502 F10A1_HUMAN |
|      |                                                    | sp Q8IZP2 ST134_HUMAN |
| 2681 | TGSTSSKEDDYESDAATIVQK300000000000                  | sp Q5T4S7 UBR4_HUMAN  |
| 2682 | LYSSEESRPYTNK2000                                  | sp Q14004 CDK13_HUMAN |
| 2683 | STLESEKPGSPEAAETSPPSNIIDHCEK2E+19                  | sp Q96T23 RSF1_HUMAN  |
| 2684 | GPVSPSVSFQPLAR200000000000                         | sp Q7Z434 MAVS_HUMAN  |
| 2685 | AHSSPASLQLGAVSPGTLTPTGVVSGPAATPTAQHLR2.0000002E+31 | sp P46937 YAP1_HUMAN  |
| 2686 | SLSNSNPDISGTPTSPDDEV2.0200000000002E+21            | sp Q96N67 DOCK7_HUMAN |
| 2687 | VISDSESDIGGSDVEFKPDTK2.000000002E+19               | sp P52701 MSH6_HUMAN  |
| 2688 | HTDDEMTGYVATR100300000                             | sp Q16539 MK14_HUMAN  |
| 2689 | QEKPAEKPAETPVATSPTATDSTSGDSSR2200000000000000      | sp P54727 RD23B_HUMAN |
| 2690 | GYDSEDDTWEPEQHLVNCEEYIHFNR2E+24                    | sp Q9Y232 CDYL1_HUMAN |
|      |                                                    | sp P42167 LAP2B_HUMAN |
| 2691 | GPPDFSSDEEREPTPVLGSGAAAAGR2.0000002E+20            | sp P42166 LAP2A_HUMAN |
|      |                                                    | sp Q15311 RBP1_HUMAN  |
| 2692 | TPSSEEISPTKFPGLYR2000020000000000                  | sp Q6PKG0 LARP1_HUMAN |
| 2693 | TASISSPSEGTPTVGSYGCTPQSLPK2.2E+23                  | sp Q9H6F5 CCD86_HUMAN |
| 2694 | QQDLHLESPQR20000                                   | sp Q8TF01 PNISR_HUMAN |
| 2695 | QLAQSSALASLTGLGGLGGYSGDSEDER200200000              | sp P46013 KI67_HUMAN  |
| 2696 | SPQPDPVDTFASTK2000000000000000                     | sp Q92797 SYMPK_HUMAN |
| 2697 | SPQTLAPVGEDAMKTPSPAEDAR2.0000000000002E+24         | sp Q8IWX8 CHERP_HUMAN |
| 2698 | SRSPTPPSSAGLGSNSAPPIDSR2.02020022E+24              | sp Q6PL18 ATAD2_HUMAN |
| 2699 | IESDTEETQDTSVDHNETGNTGESSVEENEK2E+29               | sp Q8NC51 PAIRB_HUMAN |
| 2700 | FDQLFDDESDPFEVLK2000000000                         | sp O43294 TGF11_HUMAN |
| 2701 | SPKPAAPAPPFSSSSGVLGTGLCELDR2E+28                   | sp Q9HAS0 NJMU_HUMAN  |
| 2702 | ELESSEEGGSAER200000000000                          | sp O75376 NCOR1_HUMAN |
| 2703 | HEAPSSPISGQPCGDDQNASPSK2000000000000020000         | sp Q9Y608 LRRF2_HUMAN |
| 2704 | RGSGDTSSLIDPDTLSSEL2000000000000000                | sp P19338 NUCL_HUMAN  |
| 2705 | AAAAAPASEDEDEDDEDDEDDEDDDEEDDSEEEAMETTPAK2E+34     | sp P62995 TRA2B_HUMAN |
| 2706 | RHSHSHSPMSTR202000000000                           | sp Q5T0W9 FA83B_HUMAN |
| 2707 | KPSDSLVAASSR20022000                               | sp Q13263 TIF1B_HUMAN |
| 2708 | LASPSGSTSSGLEVVAPEGTSAPGGGPGTLDDSATICR2.2E+31      | sp O15027 SC16A_HUMAN |
| 2709 | SLHSAHSLASR200200000000                            | sp O94806 KPCD3_HUMAN |
|      |                                                    | sp Q15139 KPCD1_HUMAN |
| 2710 | TISPSTSNLIPLMR20002000000000                       | sp Q14157 UBP2L_HUMAN |
|      |                                                    | sp Q15154 PCM1_HUMAN  |
| 2711 | STSAPQMSPGSSDNQSSSPQPAQQK2E+24                     | sp P27824 CALX_HUMAN  |
| 2712 | KDEETESEYDSEHENSEPVTNIR2.0020002E+20               | sp Q9HCD6 TANC2_HUMAN |
| 2713 | QKSDAEEDGGTVSQEEEDRKPK2.000000002E+20              | sp Q9BQE9 BCL7B_HUMAN |
| 2714 | SCDELSPVSPTQGGYPSEPTR200200000000000000            | sp Q9Y580 RBM7_HUMAN  |
| 2715 | VDSSTNSSPSPQSESLSPAHTSDFR200020000000000000        | sp Q9Y2X3 NOP58_HUMAN |
| 2716 | SFSSPENFQR2000000000                               | sp Q9Y4B6 VPRBP_HUMAN |
| 2717 | HIKEEPLSEEPCTSTAIASPEK200000000000000000           | sp P49023 PAXI_HUMAN  |
| 2718 | QKSDHGAYSQSPAIK2000000000000000                    | sp Q14160 SCRIB_HUMAN |
| 2719 | SSPGGQDEGGFMAQK2000000000000000                    | sp Q6PJG2 EMSA1_HUMAN |
| 2720 | NSLESISSIDR20000020000                             | sp O15014 ZN609_HUMAN |
| 2721 | SHE SNAPGSAGGQASEKPR200000000000                   | sp Q9NYF8 BCLF1_HUMAN |
| 2722 | TNSMGSATGPLPGTK2000000000000000                    | sp Q14152 EIF3A_HUMAN |
| 2723 | YSPSQNSPIHHIPSR2000000000000000                    | sp Q9UBC2 EP15R_HUMAN |
| 2724 | LGSSLSR20000                                       | sp Q3B726 RPA43_HUMAN |
| 2725 | STPSHGVSSSLNSTGSLSPK2000                           | sp O60504 VINEX_HUMAN |
| 2726 | HQEVQDQDPVFGSDSSGYQSDHKKK220302000000              | sp P42166 LAP2A_HUMAN |
| 2727 | LCDDGPQLPTSPR2000                                  | sp P42167 LAP2B_HUMAN |
|      |                                                    | sp Q9NZL4 HPBP1_HUMAN |
| 2728 | EQGTESRSSTPLPTISSAENTR222000000000000000           |                       |
| 2729 | LLQTCFSSPADDSMDR2000000000                         |                       |

|      |                                                          |    |        |             |
|------|----------------------------------------------------------|----|--------|-------------|
|      |                                                          | sp | P05534 | 1A24_HUMAN  |
|      |                                                          | sp | P30447 | 1A23_HUMAN  |
| 2730 | KGGSYSQAASSDSAQGSVSLTACK2002000000                       | sp | P01891 | 1A68_HUMAN  |
|      |                                                          | sp | P01892 | 1A02_HUMAN  |
|      |                                                          | sp | Q09160 | 1A80_HUMAN  |
|      |                                                          | sp | P10316 | 1A69_HUMAN  |
| 2731 | SLGPSLATDK20000000000                                    | sp | Q9H3N1 | TMX1_HUMAN  |
| 2732 | VGDSTPVSEKPVSAAVDANASESP2E+20                            | sp | Q9H8Y8 | GORS2_HUMAN |
| 2733 | TPELPEPSVK20000000000                                    | sp | Q8IYB3 | SRRM1_HUMAN |
| 2734 | SNSFNPLGNR20000000000                                    | sp | O95835 | LATS1_HUMAN |
| 2735 | GRLTSPDIIVLSDNEASSPR2020000002000000000                  | sp | Q8WXI9 | P66B_HUMAN  |
| 2736 | IPCKSPPELTDATSTK2000000000000000                         | sp | P46013 | KI67_HUMAN  |
| 2737 | AASPESASTPESLQAR2000000000000000                         | sp | Q96BT3 | CENPT_HUMAN |
| 2738 | TETPPPLASLVSK2000000000000000                            | sp | Q3MHD2 | LSM12_HUMAN |
| 2739 | VSPASPAGSPSADFAVHGESLGR2. 002E+23                        | sp | Q96C92 | SDCG3_HUMAN |
| 2740 | QPATPTAAESSEGEEGDDGGETESR2200000000000000000             | sp | Q96S55 | WRIP1_HUMAN |
| 2741 | SPSDLHISPLAK20000000000                                  | sp | O95785 | WIZ_HUMAN   |
| 2742 | TPSSSPITPPASETK20002000000000                            | sp | Q9NZJ0 | DTL_HUMAN   |
| 2743 | ESSIIAPAPAEDVDTPPR20000                                  | sp | Q15910 | EZH2_HUMAN  |
| 2744 | TGQAGSLSGSPKPFSPQLSAPITTK2. 02E+20                       | sp | Q9ULU4 | PKCB1_HUMAN |
| 2745 | HSPIAPSSPSPQVLAQK2000020000000000000                     | sp | Q9NQS7 | INCE_HUMAN  |
| 2746 | LASPGSTSSGLEVVAPEGTSAPGGPGTLDDSATICR2. 00000000022E+29   | sp | Q13263 | TIF1B_HUMAN |
| 2747 | NSVERPAEPVAGAATPSLVEQQK2E+22                             | sp | Q9BTC0 | DID01_HUMAN |
| 2748 | DYLLSESEDEGNDGERK2020000000000000                        | sp | Q9BVJ6 | UT14A_HUMAN |
| 2749 | AASSSPGSPVASSPSR20000                                    | sp | Q92538 | GBF1_HUMAN  |
| 2750 | SGKNSQEDSEDEKDKV2000200000000000                         | sp | Q9H1E3 | NUCKS_HUMAN |
| 2751 | SCDPGEDCASCQQDEIDVVPESPLSDVGSSEVGTGPK2002000000000000000 | sp | Q86W56 | PARG_HUMAN  |
| 2752 | SPHSPPIATPPSQSSSCSDAPMLSTVHSAK2. 020002002E+28           | sp | Q9NYF8 | BCLF1_HUMAN |
| 2753 | SFSADNFIGIQR200000000000                                 | sp | Q8N7R7 | CCYL1_HUMAN |
| 2754 | RDSFDRGPSLNPVLDYDHGSR2000000000000000                    | sp | P43243 | MATR3_HUMAN |
| 2755 | QQPQPSQTESPQEAQIIQAK2000000000000                        | sp | O96020 | CCNE2_HUMAN |
| 2756 | SPGSTPTTSSQAPQK2000000000000                             | sp | P35658 | NU214_HUMAN |
| 2757 | DTSATSQSVNGSPQAEQPSLETSK2. 02E+20                        | sp | Q86WB0 | NIPA_HUMAN  |
| 2758 | DSGSEDFLMEDDDSDYGSSK2. 00000000002E+19                   | sp | Q9H1E3 | NUCKS_HUMAN |
| 2759 | LASPGSTSSGLEVVAPEGTSAPGGPGTLDDSATICR2. 20000000002E+30   | sp | Q13263 | TIF1B_HUMAN |
| 2760 | SQDADSPGSSGAPENLTFK2002000000000000                      | sp | P55196 | AFAD_HUMAN  |
| 2761 | DSGSDQLDAGVR2020000000000000                             | sp | Q86VM9 | ZCH18_HUMAN |
| 2762 | SANGSESDGEENIGWSTVNLDEEK2. 0000202E+25                   | sp | O43290 | SNUT1_HUMAN |
| 2763 | KVHPYEDSDSEDEVDWQDTR2022000000000000                     | sp | O14730 | RIOK3_HUMAN |
| 2764 | QILIIACSPVSSVR20000000                                   | sp | Q5QJE6 | TDIF2_HUMAN |
| 2765 | SPNELVDDLK2000000000000                                  | sp | Q9UNZ2 | NSF1C_HUMAN |
| 2766 | SPGFASPK2000000000                                       | sp | P49790 | NU153_HUMAN |
| 2767 | LGSTGSPNSEAESVPEVNPVPPK2. 2E+26                          | sp | Q8IZ21 | PHAR4_HUMAN |
| 2768 | AGMSSNQSISPVLDVPR1020000220000000000                     | sp | Q9UQ35 | SRRM2_HUMAN |
| 2769 | GTSRPPPEGGLGYSQLGDDDLK2E+20                              | sp | Q9UQ88 | CD11A_HUMAN |
|      |                                                          | sp | P21127 | CD11B_HUMAN |
| 2770 | KWSDSSKQDDSPSGASYGQDYDLSPSR2. 022E+25                    | sp | Q9NYV4 | CDK12_HUMAN |
| 2771 | GLRDSHSSEDEASSQTDLSQTISK2. 20000022E+19                  | sp | Q5JTV8 | TOIP1_HUMAN |
| 2772 | GSPTSAYPER2000000000                                     | sp | Q6ZRV2 | FA83H_HUMAN |
| 2773 | SALSPSKSPAK20000                                         | sp | P49792 | RBP2_HUMAN  |
|      |                                                          | sp | Q7Z3J3 | RGPD4_HUMAN |

|      |                                                      |                       |
|------|------------------------------------------------------|-----------------------|
| 2774 | VGSLDNVGHLPAGGAVK2000000000000000                    | sp P27816 MAP4_HUMAN  |
| 2775 | VPPAPVPCPPSPGSAVPSSPK20000000000000                  | sp O95817 BAG3_HUMAN  |
| 2776 | RPPSPDIVLSDNEQPSSPR20000000000002000                 | sp Q86YP4 P66A_HUMAN  |
| 2777 | GPAATPGSPDPGPGPWGEEHLAER2E+20                        | sp Q5VV17 OTUD1_HUMAN |
| 2778 | AGPTLTDENDDLGLPPSPGDTSYQQDQVDDFHEAR2E+33             | sp Q9NQZ2 SAS10_HUMAN |
| 2779 | QGSITSPQANEQSVTPQR220000000020000                    | sp Q9UQ35 SRRM2_HUMAN |
| 2780 | APEPEEEIEEVEESEDEGEDPALDLSQAIAFQQA2E+23              | sp Q8TBF4 ZCRB1_HUMAN |
| 2781 | ERDHSPTPSVFNSEER20000000000000                       | sp Q6UN15 FIP1_HUMAN  |
| 2782 | DLELPLSPLLGGGPER20000000000000                       | sp P19419 ELK1_HUMAN  |
| 2783 | ADAPDAGAQSDSELPSYHQNDVSLDR2000000000000000           | sp Q92538 GBF1_HUMAN  |
| 2784 | KLSGDQPAAR2000000000                                 | sp Q13428 TCOF_HUMAN  |
| 2785 | EHYPVSSPSSPPAQGGVSR200000200000000000                | sp O75179 ANR17_HUMAN |
| 2786 | SASASHQADIK200000000000                              | sp Q14739 LBR_HUMAN   |
| 2787 | SYLEGSSDNQLKDESETPVDDR3.00002E+21                    | sp Q9UHI6 DDX20_HUMAN |
| 2788 | TGVTSTSDSEEEGDDQEGEK222000000000000000               | sp O75475 PSIP1_HUMAN |
| 2789 | AELGMDSTSQSPPIKR2000000                              | sp Q9NR19 ACSA_HUMAN  |
| 2790 | VFPEPTESGDEGEELGLPLLSTR200000000000000000            | sp Q9BUR4 WAP53_HUMAN |
| 2791 | RLSPSASPPR200020000                                  | sp Q8IYB3 SRRM1_HUMAN |
| 2792 | EGETQGVAFEHESPADFQNSQSPVQDQDK2E+26                   | sp P78332 RBM6_HUMAN  |
| 2793 | KYESDEDSLSSGR200020000000                            | sp O00418 EF2K_HUMAN  |
|      |                                                      | sp P05534 1A24_HUMAN  |
|      |                                                      | sp P30447 1A23_HUMAN  |
| 2794 | GGSYSQAASSDSAQGSVSLTACK20002002000000                | sp P01891 1A68_HUMAN  |
|      |                                                      | sp P01892 1A02_HUMAN  |
|      |                                                      | sp Q09160 1A80_HUMAN  |
|      |                                                      | sp P10316 1A69_HUMAN  |
| 2795 | TFQQIQEEEDDDYPGSYSPQDPSAGPLLTEELIK200000000000000000 | sp Q9NQG5 RPR1B_HUMAN |
| 2796 | DFLSGPDYDHTVGSDEDEEVEGEP2020000000000000             | sp Q6ZW31 SYDE1_HUMAN |
| 2797 | QGGSQPSSFSQSQVTPQDQEK200000000000000000              | sp Q9H0L4 CSTFT_HUMAN |
| 2798 | SEDEDSLEEAGSPAPGPCPR2000000000000000                 | sp Q8TBB5 KLDC4_HUMAN |
| 2799 | RNSSSPVSPASVPGQR22002000000000                       | sp Q9H1B7 I2BPL_HUMAN |
| 2800 | STSAQMSPGSSDNQSSSPQAQQK2E+25                         | sp Q14157 UBP2L_HUMAN |
| 2801 | CSSSSGGSSGDEDEGLDGLDAPGGGK2.22E+24                   | sp Q9P258 RCC2_HUMAN  |
| 2802 | TPASTPVSGTPQASPMIER20002010000                       | sp Q9UHR4 BI2L1_HUMAN |
| 2803 | YSPSQNSPIHHIPSR2000000000000000                      | sp Q9NYF8 BCLF1_HUMAN |
| 2804 | DYTGCTSESLSPVK20000                                  | sp O95297 MPZL1_HUMAN |
| 2805 | DVDDGSGSPHSPHLSSK200000000000                        | sp Q9H4A3 WNK1_HUMAN  |
| 2806 | KDSEGYSESPDLEFEYADTDK20000000000000                  | sp Q5VSL9 STRP1_HUMAN |
| 2807 | YGMGTSVER10020000                                    | sp P08559 ODPA_HUMAN  |
| 2808 | GGNVFAALIQQSEEEEEEEK2000000000                       | sp Q8NE71 ABCF1_HUMAN |
| 2809 | AAYGDLSEEEEEENEPESLGVVYK220000000000000000           | sp O15541 R113A_HUMAN |
| 2810 | HGSFHEDEDPIGSPR20000000002000                        | sp Q96T58 MINT_HUMAN  |
| 2811 | EKTPSPKEEDEEPESPPEK202000000000200000                | sp Q9H1E3 NUCKS_HUMAN |
| 2812 | KAENAEGQTPAIGPDGEPLDQMSDLPVK2002000000               | sp P51532 SMCA4_HUMAN |
| 2813 | RDPSSNDINGMEPTPSTVSTPSADLLGLR22020000000000          | sp O95782 AP2A1_HUMAN |
| 2814 | SDDSFQSLHGSLPLDSFSK2.002E+19                         | sp Q7Z5J4 RAI1_HUMAN  |
| 2815 | VSPSGMEEAGCSR200000000000                            | sp Q96RL1 UIMC1_HUMAN |
| 2816 | VLDTSSLTQSAPASPTNK200000                             | sp Q8N122 RPTOR_HUMAN |
| 2817 | EHYPVSSPSSPPAQGGVSR2202000000000000                  | sp O75179 ANR17_HUMAN |
| 2818 | SPISDNSGCDAPGNSNPSLSPSSAESEK2.00200000002E+26        | sp Q99590 SCAFB_HUMAN |
| 2819 | DFLSGPDYDHTVGSDEDEEVEGEP2000200000000000             | sp Q6ZW31 SYDE1_HUMAN |
| 2820 | HLSESSGKPLSTK200000000000                            | sp Q8IVT2 MISP_HUMAN  |
| 2821 | VSPASPAGSPSADFAVHGESLDR2.0002E+20                    | sp Q96C92 SDCG3_HUMAN |

|      |                                               |                       |
|------|-----------------------------------------------|-----------------------|
| 2822 | GYSPYSVSGSGSTAGSR200200                       | sp Q15149 PLEC_HUMAN  |
| 2823 | VMTIPYQMPASSPVICAGGQDR1.00000010002E+22       | sp Q15365 PCBP1_HUMAN |
| 2824 | TSSVSNPQDSVGSPCR200000                        | sp P49023 PAXI_HUMAN  |
| 2825 | KPSTSDSDSNFEK220020000000                     | sp P11388 TOP2A_HUMAN |
| 2826 | KPPAPSPVQSQSPSTNWSPAVPVK2.000000000002E+19    | sp Q8IYB3 SRRM1_HUMAN |
| 2827 | FAEDEEKSENSEEDGDITDK20022000000000            | sp Q5C9Z4 NOM1_HUMAN  |
| 2828 | ALEEGDGSVSGSSPR2000                           | sp Q8N3X1 FNBP4_HUMAN |
| 2829 | TQMAEVLSPR2000                                | sp P11388 TOP2A_HUMAN |
| 2830 | ATSPLVSLYPALECR2000000000000000               | sp Q96G74 OTUD5_HUMAN |
| 2831 | RTDALTSPPGR220000                             | sp P49736 MCM2_HUMAN  |
| 2832 | ESEVCPVPTNSPSPPLPPPPPLPK200020000000000000    | sp Q9ULJ3 ZBT21_HUMAN |
| 2833 | TPAQSGAWDPNNPNTPSR20000000000000000000        | sp 000267 SPT5H_HUMAN |
| 2834 | EVSDDEAEKEDK200000000000                      | sp P07900 HS90A_HUMAN |
| 2835 | RPTETNPVTSNSDEECNETVK20200000000000           | sp P46100 ATRX_HUMAN  |
| 2836 | KLTSDEEGEPSGK220000000000                     | sp Q8WVC0 LEO1_HUMAN  |
| 2837 | GKGNIESSEDEDDTADLFPEESGFHAWR2.22E+24          | sp Q9H501 ESF1_HUMAN  |
| 2838 | KPVTVSPPTPTSPTEGEAS2020000000000000           | sp Q9Y6G9 DC1L1_HUMAN |
| 2839 | AVSLDSPVSVGSPPVK200000000000000000            | sp Q9Y6Q9 NCOA3_HUMAN |
| 2840 | QGSITSPQANEQSVTPQR20200000000020000           | sp Q9UQ35 SRRM2_HUMAN |
| 2841 | TSLMSAESPTPR201200200000                      | sp P49810 PSN2_HUMAN  |
| 2842 | ASALLFSSDEEDQWNIPASQTHLASDSR2.2E+22           | sp Q641Q2 FA21A_HUMAN |
| 2843 | DGDSYDPYDFSDEEEMPQVHTPK300000000000000000     | sp Q5SNT6 FA21B_HUMAN |
| 2844 | ELSTSPCNPIVR20200000000                       | sp P25205 MCM3_HUMAN  |
| 2845 | SANGGSESDGEENIGWSTVNLDEEK2.02E+20             | sp Q9H2Y7 ZN106_HUMAN |
| 2846 | SSSPTQYGLTK2000000000                         | sp 043290 SNUT1_HUMAN |
| 2847 | LPALSHSEGEDEDEEEDGK202000000000000000         | sp Q9NYL2 MLTK_HUMAN  |
| 2848 | SSMSGLHLVK20000000                            | sp P55201 BRPF1_HUMAN |
| 2849 | GSPSPASVSSGR200000000000                      | sp Q13085 ACACA_HUMAN |
| 2850 | MSGGSTMSSGGGNTNNSNSK200000000000000000        | sp P10398 ARAF_HUMAN  |
| 2851 | SLGGAVGSVASGAR2000000000000000                | sp Q86U70 LDB1_HUMAN  |
| 2852 | IFDEVMGCFSDSPQSPFPPEAGHTSLYDEDKVR2.000002E+26 | sp Q8NHG8 ZNR2_HUMAN  |
| 2853 | VQSPEPPAPER2000000000                         | sp Q13085 ACACA_HUMAN |
| 2854 | SPPTQVAISSDSAR2000000000000000                | sp Q14160 SCRIB_HUMAN |
| 2855 | NTPSQHSHSIQHSPER2000000000020000              | sp Q6ZUT6 COO52_HUMAN |
| 2856 | VSNLQVSPK2000                                 | sp Q9NYF8 BCLF1_HUMAN |
| 2857 | HSPSPPPPTPTESR20200000000000                  | sp 000443 P3C2A_HUMAN |
| 2858 | LAAQLGAPTSPIPDSAIVNTR20000000000000           | sp Q92922 SMRC1_HUMAN |
| 2859 | MSGEPITVESIR20000000000000                    | sp Q9H8Y5 ANKZ1_HUMAN |
| 2860 | EGSPIPHDPEFGSK200000000000                    | sp Q5VT52 RPRD2_HUMAN |
| 2861 | SPSKPTLAYPESNSR20000000000000                 | sp P85037 FOXK1_HUMAN |
| 2862 | YTPTSPSYSPSSPEYTPSPK220000000000              | sp Q86XR8 CEP57_HUMAN |
| 2863 | AGMSSNQSISSPVLDVPR102002002000000000          | sp P24928 RPB1_HUMAN  |
| 2864 | SHVSSEPYEPIPPQVPVVEHK200000000000             | sp Q9UQ35 SRRM2_HUMAN |
| 2865 | EAENQGLDISSPGMSGHR2000000000                  | sp 075376 NCOR1_HUMAN |
| 2866 | DSGDENEPIQER200000000000                      | sp Q15545 TAF7_HUMAN  |
| 2867 | NVALLSPLYHSPAR20000                           | sp Q8WX93 PALLD_HUMAN |
| 2868 | NEVNGTSEDIKSEGDTQSN200000200                  | sp Q15717 ELAV1_HUMAN |
| 2869 | ADEPSSEESDLEIDK220020000000                   | sp 095232 LC7L3_HUMAN |
| 2870 | RYPSSISSSPQK200000                            | sp P50502 F10A1_HUMAN |
| 2871 | KKSEPDELLEDFLNSSQK200000000000000000          | sp Q8IZP2 ST134_HUMAN |
| 2872 | GLNSQSSDHLNKR2000000000                       | sp Q14157 UBP2L_HUMAN |
|      |                                               | sp Q8TBA6 GOGA5_HUMAN |
|      |                                               | sp A8CG34 P121C_HUMAN |
|      |                                               | sp Q96HA1 P121A_HUMAN |

|      |                                              |                       |
|------|----------------------------------------------|-----------------------|
| 2873 | KLEGNPQGSNQGK20000000000                     | sp P61006 RAB8A_HUMAN |
| 2874 | SPGSTPTTSSQAPQK2020000000000                 | sp P35658 NU214_HUMAN |
| 2875 | SASPHVDLCLVSPCEFEHR2.02E+20                  | sp Q66K74 MAP1S_HUMAN |
| 2876 | SPISDNSGCDAPGNSNPSLSPSSAESEK2E+29            | sp Q99590 SCAFB_HUMAN |
| 2877 | SIQFVDWCPTGFK20000000000000                  | sp P68363 TBA1B_HUMAN |
|      |                                              | sp P68366 TBA4A_HUMAN |
|      |                                              | sp Q9UQ88 CD11A_HUMAN |
| 2878 | DLLSDLQDISDSER202000                         | sp P21127 CD11B_HUMAN |
|      |                                              | sp Q9H3Z4 DNJC5_HUMAN |
| 2879 | SLSTSGESLYHVLGLDK20000000000                 | sp Q96JM3 CHAP1_HUMAN |
| 2880 | DNQESSDAELSSSEYIK2000000000000               | sp P49790 NU153_HUMAN |
| 2881 | IPSIVSSPLNSPLDR20000000000                   | sp Q8IYB3 SRRM1_HUMAN |
| 2882 | APQTSSSPPVVR202000000                        | sp Q9UQ35 SRRM2_HUMAN |
| 2883 | SRTPPSAPSQSR200000000000                     | sp P29317 EPHA2_HUMAN |
| 2884 | LPSTSGSEGVPR200000000                        | sp P17812 PYRG1_HUMAN |
| 2885 | SGSSPDSEITELKFPSINH2.022E+21                 | sp P80723 BASP1_HUMAN |
| 2886 | AQGPAAAEKPKVEAPAANSQTVTVK2000000000          | sp P46013 KI67_HUMAN  |
| 2887 | IPCKSPELEDTATSSK2000000000000                | sp Q13107 UBP4_HUMAN  |
| 2888 | EQLSETEGSGEDEPGNDPSETTQK2.002E+19            | sp Q8N108 MIER1_HUMAN |
| 2889 | DSSGQEDTQSSNDDPSQSVASQDAQEIRPR2.000002E+30   | sp Q8TEW0 PARD3_HUMAN |
| 2890 | FSPDSQYIDNR200000000000                      | sp Q9NR30 DDX21_HUMAN |
| 2891 | NGFPHPEDCNPSEAASEESNSEIEQIPVEQK2000000000000 | sp Q96S38 KS6C1_HUMAN |
| 2892 | SPEESFDIK2000200000                          | sp Q5UIP0 RIF1_HUMAN  |
| 2893 | ATSEEDVSIKSPICEK2000000                      | sp O15234 CASC3_HUMAN |
| 2894 | DPSPEADAPVLGSPEK200000000000000              | sp Q9BTC0 DIDO1_HUMAN |
| 2895 | GGDDHDDTSDSDGLTLK2002020000000               | sp Q92993 KAT5_HUMAN  |
| 2896 | SNCLGTDEDSQDSSDGIPAPR2.000000002E+22         | sp Q8IYP5 FUND1_HUMAN |
| 2897 | NPPPQDYESDDSYEVLDTYAR2000000000000           | sp P18669 PGAM1_HUMAN |
| 2898 | FSGWYDADLSPAGHEEAK20000000000000000          | sp Q96MG7 MAGG1_HUMAN |
| 2899 | GPGGSQGSQPSPQGAR2000000                      | sp Q96S55 WRIP1_HUMAN |
| 2900 | RPAAAAAAGSASPR2000                           | sp Q96B23 CR025_HUMAN |
| 2901 | RDSSSQLASTESDKPTTGR2200000000000000000       | sp P55081 MFAP1_HUMAN |
| 2902 | KIVEPEVVGESDSEVEGDAWR202000000000            | sp Q9UKJ3 GPTC8_HUMAN |
| 2903 | KPSVSEEVQATPNK2000000000000                  | sp Q07960 RHG01_HUMAN |
| 2904 | SDDSKSSPELVTHLK22000000000                   | sp Q9TNN7 1C05_HUMAN  |
|      |                                              | sp Q07000 1C15_HUMAN  |
|      |                                              | sp Q29960 1C16_HUMAN  |
|      |                                              | sp Q29963 1C06_HUMAN  |
|      |                                              | sp P30505 1C08_HUMAN  |
| 2905 | GGSCSQAASSNSAQGSDESLIACK2000000000           | sp P30508 1C12_HUMAN  |
|      |                                              | sp Q95604 1C17_HUMAN  |
|      |                                              | sp P04222 1C03_HUMAN  |
|      |                                              | sp Q29865 1C18_HUMAN  |
|      |                                              | sp P30504 1C04_HUMAN  |
|      |                                              | sp P30510 1C14_HUMAN  |
| 2906 | VDSEGFSENDAAGDFR200000000000                 | sp O43823 AKAP8_HUMAN |
| 2907 | RASQGLLSIENSESDSSEAK2E+19                    | sp Q5UIP0 RIF1_HUMAN  |
| 2908 | NDKSEEEQSSSVK200000000000                    | sp P07910 HNRPC_HUMAN |
| 2909 | LHYTPPLQSPIIDNDPLLQSPWR20000000000000000     | sp Q5TKA1 LIN9_HUMAN  |
| 2910 | REESPMVDQPSAQDTQSIASDGTQGEK1.00000002E+26    | sp Q7Z6Z7 HUWE1_HUMAN |
| 2911 | YDWSGAEESDDENAVCAAQNCQRPK2.00002E+23         | sp P29375 KDM5A_HUMAN |
| 2912 | TPPVALNSSR200000000000                       | sp Q9UQ35 SRRM2_HUMAN |
| 2913 | KLSPIIEDSR200000200                          | sp O60566 BUB1B_HUMAN |
| 2914 | VISDESIDIGSDVEFKPDTK2.000200002E+19          | sp P52701 MSH6_HUMAN  |

|      |                                                   |                       |
|------|---------------------------------------------------|-----------------------|
| 2915 | EGDVDVSDSDEDDNLPANFDTCHR2. 02E+19                 | sp Q9NYV6 RRN3_HUMAN  |
| 2916 | GSGTASDDEFENLR20002000000000                      | sp Q7Z6Z7 HUWE1_HUMAN |
| 2917 | KPSDSLVAASSR2020022000                            | sp Q5T0W9 FA83B_HUMAN |
| 2918 | GHNEGNQLISAEPVIVSSDEEGPVEHK220000000000           | sp Q9BQF6 SENP7_HUMAN |
| 2919 | IVSGSPISTPSPSPLPR20000000200000                   | sp Q9ULM3 YETS2_HUMAN |
| 2920 | SSSLKSAQGTGFELGQLQSIR2. 2E+20                     | sp Q9C0B5 ZDHC5_HUMAN |
| 2921 | GTSDSSSGNVSEGESPPDSQEDSFQGR200000000000000000     | sp Q8WUB8 PHF10_HUMAN |
| 2922 | TIQNSSVSPTSSSSSSSTGETQTQSSSR2000000000000000      | sp Q7Z417 NUFP2_HUMAN |
| 2923 | SAAEMYGSVTEHPSPSPLLSSSFDLDYDFQR200000000000000000 | sp P07910 HNRPC_HUMAN |
| 2924 | KEESEESDDMGFLFD200200010000000                    | sp P05387 RLA2_HUMAN  |
|      |                                                   | sp P05386 RLA1_HUMAN  |
| 2925 | DLPTIPGVTSPSSDEPPMEASQSHLR20000000000000000000    | sp Q13541 4EBP1_HUMAN |
| 2926 | ELDDSSSESSDLQLEGPSTLR22022000000000000000         | sp P29590 PML_HUMAN   |
| 2927 | TGSGSPFAGNSPAR200000000000                        | sp Q9UPT8 ZC3H4_HUMAN |
| 2928 | VSALEEDMDDVESSEEEEEDEK100002200000000000          | sp Q8NAV1 PR38A_HUMAN |
| 2929 | SLDSEPSVPSAAKPPSPEK20000                          | sp Q7Z3K3 POGZ_HUMAN  |
| 2930 | LSVPTSDEEDEVPAKPR20022000000000000000             | sp Q8NE71 ABCF1_HUMAN |
| 2931 | GLFSDEEDEDLFSQSASNLK2. 00000000002E+19            | sp Q9Y4E1 FA21C_HUMAN |
| 2932 | TPASINATPANINLADLTR2. 002E+19                     | sp Q7KZ85 SPT6H_HUMAN |
| 2933 | RGSGDTSSLIDPDTLSELR20000000000000000000           | sp Q9Y608 LRRF2_HUMAN |
| 2934 | QSHSEPSLQSK20000000                               | sp Q9UQ35 SRM2_HUMAN  |
| 2935 | LGSPDSTSPSSPTFWNYSR2000000000000000               | sp Q96SK2 TM209_HUMAN |
| 2936 | GPSPAPAPAASPQPGSR2000000020000000                 | sp Q8IX07 FOG1_HUMAN  |
| 2937 | LASPSGTSSGLEVVAPGTSAPGGGPGTLDDSATICR2. 22E+32     | sp Q13263 TIF1B_HUMAN |
| 2938 | SVEPQDAGPLER20000000000000                        | sp Q9NZT2 OGFR_HUMAN  |
| 2939 | HDSPDLAPNVYSLPR2000000000000000                   | sp Q9BRD0 BUD13_HUMAN |
| 2940 | DISEGGESPVVQSDEEEVQVDTALATSHTDR2. 00002E+24       | sp Q96EV8 DTBP1_HUMAN |
| 2941 | TEARSSDEENGPPSSPDLDR220000000020000000            | sp Q96B36 AKTS1_HUMAN |
| 2942 | LCSSAETLHSPDIGK2000000000000000                   | sp 096028 NSD2_HUMAN  |
| 2943 | TGSYGALAEITASK2000000000000000                    | sp 014974 MYPT1_HUMAN |
| 2944 | SPPPEMDTPTSTR2000000000000000                     | sp P46013 KI67_HUMAN  |
| 2945 | LSTTPSPTSSLHEDGVEDFR2. 20000002E+19               | sp 094842 TOX4_HUMAN  |
| 2946 | ASPITNDGEDEFVPSDGLDKDEYTFSPGK2E+28                | sp Q02880 TOP2B_HUMAN |
| 2947 | QVPDAAATATAYLCGVK2000000000000000                 | sp P09923 PPBI_HUMAN  |
| 2948 | LVDVSPDR20000                                     | sp Q9NYZ3 GTSE1_HUMAN |
| 2949 | ASESSSEKDDYEIFVK20222000000000000000              | sp P18583 SON_HUMAN   |
| 2950 | VSDQNSPVLPK2000000                                | sp Q9UPU5 UBP24_HUMAN |
| 2951 | EISSPESCPPEIK220020000000                         | sp Q92889 XPF_HUMAN   |
| 2952 | GRASSHSQTQGGGSVTK220000000000000000               | sp P02545 LMNA_HUMAN  |
| 2953 | SPGHMVIDQTK2000000000000000                       | sp Q9NWH9 SLTM_HUMAN  |
| 2954 | SASPSVGEERPR20200000000000                        | sp Q9P1Y6 PHRF1_HUMAN |
| 2955 | IESDTEETQDTSVDHNETGNTGESSVEENEK2E+29              | sp Q6PL18 ATAD2_HUMAN |
| 2956 | SKSQSSGSSATHPISVPGAR20000000000000                | sp Q9Y4H2 IRS2_HUMAN  |
| 2957 | LTFDITTFSPNTGK2000000                             | sp P45880 VDAC2_HUMAN |
| 2958 | LSAITMALQYGESEEDAALAAAR1. 00000202E+19            | sp Q86U86 PB1_HUMAN   |
| 2959 | SSTPLPTISSAENTR200000000000                       | sp P42166 LAP2A_HUMAN |
|      |                                                   | sp P42167 LAP2B_HUMAN |
| 2960 | KSPSGPVKSPPLSPVGTTPVK2000200000000000             | sp Q9BVC5 ASHWN_HUMAN |
| 2961 | KRESESEDETTPAAPQLIK20202000000000000000           | sp 060832 DKC1_HUMAN  |
| 2962 | YSPTSPTYSPVYTPSPK2E+20                            | sp P24928 RPB1_HUMAN  |
| 2963 | CPEILSDESSSDEDEK200222000000                      | sp P35659 DEK_HUMAN   |
| 2964 | AASSSPGSPVASSPSR2002000200000                     | sp Q92538 GBF1_HUMAN  |
| 2965 | EPEGPPSPGK20000                                   | sp P58012 FOXL2_HUMAN |
| 2966 | VSEEQTQPPSPAGAMSTAMGR20000010001000               | sp Q16666 IF16_HUMAN  |

|      |                                                   |                       |
|------|---------------------------------------------------|-----------------------|
| 2967 | SASSGAEGDVSSEREP20000000000000                    | sp Q8TEA8 DTD1_HUMAN  |
| 2968 | SPSFGEDYYGPSR20000000000000                       | sp P49761 CLK3_HUMAN  |
| 2969 | GYSPYSVSGSGSTAGSR3000002000000000                 | sp Q15149 PLEC_HUMAN  |
| 2970 | KQETAAVCGETDEEAGESGGEGIFR2000000200000000         | sp Q9ULL5 PRR12_HUMAN |
| 2971 | RNSSDSAIDNPKPNK20000000000000                     | sp P46100 ATRX_HUMAN  |
| 2972 | DGGSGNSTIIVSR200220000000                         | sp Q7Z6Z7 HUWE1_HUMAN |
| 2973 | SNSEVEDVGPTSHNR2000000000000000                   | sp Q13206 DDX10_HUMAN |
| 2974 | ADLNQGIGEPQSPSR20000                              | sp Q96C19 EFHD2_HUMAN |
| 2975 | TASGSSVTSLDGTR2000000000000000                    | sp Q92597 NDRG1_HUMAN |
| 2976 | SVSASSGPCSPAAPHPPPPR2.00002E+21                   | sp Q86UY5 FA83A_HUMAN |
| 2977 | LASTSDIEEK2000000000                              | sp O14974 MYPT1_HUMAN |
| 2978 | AMLDQLMGTSR200                                    | sp Q9Y383 LC7L2_HUMAN |
| 2979 | LSSSDRYSDASDDSFSEPR20020020000000                 | sp Q9NRF8 PYRG2_HUMAN |
| 2980 | SHSPSSPDPTSPVGDSTR2000000000000000                | sp Q13586 STIM1_HUMAN |
| 2981 | KSSISSISGR2000200000                              | sp Q86SQ0 PHLB2_HUMAN |
| 2982 | GLSQEGTGPPTSAGEGHSR200000000000000000             | sp Q63HN8 RN213_HUMAN |
| 2983 | DMSPLSETEMALGK20000000000000                      | sp P27816 MAP4_HUMAN  |
| 2984 | ASLVALPEQTASEEETPPPLLTK20000000000000             | sp Q9UKV3 ACINU_HUMAN |
| 2985 | EEGPPPPSPDGASSDAEPEPPSGR200002200000000000        | sp Q9NTJ3 SMC4_HUMAN  |
| 2986 | RPESAPAESSPSK200000000000                         | sp Q07889 SOS1_HUMAN  |
| 2987 | KPSPSEPEPWKPFPAVSPEPR202000000000000000           | sp Q96JM3 CHAP1_HUMAN |
| 2988 | QEKAPEKPAETPVATSPTATDSTSGDSSR2000000000000000     | sp P54727 RD23B_HUMAN |
| 2989 | SQASMVINSDDTDEEEVSAALTLAHLK1.000202E+23           | sp Q14676 MDC1_HUMAN  |
| 2990 | TPLSSLSATSNNSTVACIDR2020000000000000              | sp P00533 EGFR_HUMAN  |
| 2991 | SQEMVHLVNK200100000000                            | sp P16070 CD44_HUMAN  |
| 2992 | GPSPSPVGPSPASVAQSR200000000000000000              | sp O14497 ARI1A_HUMAN |
| 2993 | SDGACDSPSSDKENSSQIAQDHQK20000000200000000000      | sp Q9UIG0 BAZ1B_HUMAN |
| 2994 | RSEDEPPAASASAAPPPQR20000000000000000000           | sp Q96IZ0 PAWR_HUMAN  |
| 2995 | MSPMGTASGSNSPTSASVQR2000000000000000              | sp O76080 ZFAN5_HUMAN |
| 2996 | SPSPDDILER202000000000                            | sp Q13523 PRP4B_HUMAN |
| 2997 | IESDTEETQDTSVDHNETGNTGESSVEENEK2E+29              | sp Q6PL18 ATAD2_HUMAN |
| 2998 | NNSNTCNIENELEDSRK2000000000000000                 | sp Q6PL18 ATAD2_HUMAN |
| 2999 | SSRSSPELTR200200000000                            | sp Q9UQ35 SRRM2_HUMAN |
| 3000 | IGHHSTDDSSAYR200000000000                         | sp P12694 ODBA_HUMAN  |
| 3001 | MHDGELEEQEEDDEKSDSEGGDLK1E+25                     | sp Q9NU22 MDN1_HUMAN  |
| 3002 | ANSDDERPVASDNDDEK200000002000000000               | sp Q8WVC0 LEO1_HUMAN  |
| 3003 | AVPPVSPELR2000000                                 | sp Q96JM3 CHAP1_HUMAN |
| 3004 | KPPAPSPVQSQSPSTNWSPAVPVK2.000202E+19              | sp Q8IYB3 SRRM1_HUMAN |
| 3005 | KPVTVSPTTPTSPTTEGEAS20200000000000                | sp Q9Y6G9 DC1L1_HUMAN |
| 3006 | KSPSPGVKSPPLSPVGTTPVK20000200020000000000         | sp Q9BVC5 ASHWN_HUMAN |
| 3007 | ITETGAVKPTGECSGEQSPDTNYEPPGEDK2000000000000000    | sp P49454 CENPF_HUMAN |
| 3008 | TASSDSEEDPEALEK20022020000000000000               | sp Q8N9T8 KRI1_HUMAN  |
| 3009 | AAPEASSPPASPLQHLLPGK200020000000000000            | sp Q96TA1 NIBL1_HUMAN |
| 3010 | GSGSACSLCCCGR2000000000000000                     | sp Q9GZU1 MCLN1_HUMAN |
| 3011 | APIDTSDVEEK20000000                               | sp Q06265 EXOS9_HUMAN |
| 3012 | TPAAPASPAAVPSEGSGSTGWR20000000000000000000        | sp P07199 CENPB_HUMAN |
| 3013 | TDALTSSPGR20000                                   | sp P49736 MCM2_HUMAN  |
| 3014 | KPIDSLRDSR200                                     | sp Q9UQ35 SRRM2_HUMAN |
| 3015 | SSGHSSSELSPAVEK200000000                          | sp Q9UQ35 SRRM2_HUMAN |
| 3016 | STAQQELDGKSPSTPVIVASHTANKEEK200000000000000000    | sp P35606 COPB2_HUMAN |
| 3017 | LASPSGSTSSGLEVVPEGTSAPGGGPGTLDDSATICR2E+32        | sp Q13263 TIF1B_HUMAN |
| 3018 | SQLDDHPESDDEENFIDANDEDMEK20000000000000000000     | sp Q03701 CEBPZ_HUMAN |
| 3019 | QNPEQSADEDAEKNEEDSEGSSDEDEDEDGVSAAATFLK2.0022E+21 | sp B5ME19 EIFCL_HUMAN |
|      |                                                   | sp Q99613 EIF3C_HUMAN |

|      |                                                       |                       |
|------|-------------------------------------------------------|-----------------------|
| 3020 | QGSQSSQMEVQEGYGFSGDDPYSSAEPHVSGVK2E+33                | sp Q13263 TIF1B_HUMAN |
| 3021 | SPSPPTQHTGQPPGQPSAPSQLSAPR2E+24                       | sp Q68EM7 RHG17_HUMAN |
| 3022 | SKSQSSGSSATHPI SVPGAR200000000000000000               | sp Q9Y4H2 IRS2_HUMAN  |
| 3023 | QSETVDQNSDSEMLAILK20000002000000000                   | sp P46100 ATRX_HUMAN  |
| 3024 | SHSESASPSALSSSPNLSPTGWSQPK2200002000000000            | sp P04049 RAF1_HUMAN  |
| 3025 | EADDDEEVDDNIPEMPSPK102000                             | sp P26358 DNMT1_HUMAN |
| 3026 | SELSQDAEPAGSQETK200000000000000000                    | sp Q9BVJ6 UT14A_HUMAN |
| 3027 | SVSPSPSVLSEGR20200000000000                           | sp Q86UW7 CAPS2_HUMAN |
| 3028 | TDHGAEIVYKSPVVGDTSPR200020002000                      | sp TAU_HUMAN          |
|      |                                                       | sp P10636 TAU_HUMAN   |
| 3029 | GGPASPGGLQGLETR200000000000                           | sp Q8NCD3 HJURP_HUMAN |
| 3030 | TTSAGTGMWR2000000000                                  | sp P60468 SC61B_HUMAN |
| 3031 | TSSSSPANSDVEIDGIGR2000200000000000                    | sp O60293 ZC3H1_HUMAN |
| 3032 | SATPEPVTDNR202000000000                               | sp Q5VT52 RPRD2_HUMAN |
| 3033 | SPGPAADGPIDLSK2000000000000000                        | sp Q8IX07 FOG1_HUMAN  |
| 3034 | TDPSLDLHLSAETQPAQEELR2022000000000000                 | sp P11171 41_HUMAN    |
| 3035 | SSSVGSSSSYPI SPAVSR200220000000000000                 | sp Q15149 PLEC_HUMAN  |
| 3036 | VGDSTPVSEKPVSAAVDANASESP200                           | sp Q9H8Y8 GORS2_HUMAN |
| 3037 | ALEVEESNSEDEASFK20200002000                           | sp Q03111 ENL_HUMAN   |
| 3038 | LEKEEEEGISQESSEEEQ2200000                             | sp P17096 HMGA1_HUMAN |
| 3039 | ERTPESEEEVWETNR200200000000000000                     | sp Q5T200 ZC3HD_HUMAN |
| 3040 | ELSNSPLRENSFGSPLEFR202000000000000000                 | sp Q9UQ35 SRRM2_HUMAN |
| 3041 | LSSKLSAVSLR2002000                                    | sp Q15036 SNX17_HUMAN |
| 3042 | SQSSDTEQQSPTSGGGK200000000                            | sp P23588 IF4B_HUMAN  |
| 3043 | GLNSQSSDHLNK200000000000                              | sp A8CG34 P121C_HUMAN |
|      |                                                       | sp Q96HA1 P121A_HUMAN |
| 3044 | SVSTPSEAGSQDSGDGAVGSR2000000000                       | sp Q13409 DC1I2_HUMAN |
| 3045 | RTDAL TSSPGR20000                                     | sp P49736 MCM2_HUMAN  |
| 3046 | SPAYTPQNL DSESESGSSIAEK2E+22                          | sp Q15648 MED1_HUMAN  |
| 3047 | TSPADHGGSVGSESGSAVDSVAGEHSVSGR2E+30                   | sp Q5T4S7 UBR4_HUMAN  |
| 3048 | KVEEDLKADEPSSEESDLEIDK220000000000                    | sp P50502 F10A1_HUMAN |
| 3049 | EGDPVSLSTPLETEFGSPSELSPR200000000                     | sp Q9BUR4 WAP53_HUMAN |
| 3050 | ETAVPGLGIEDISP NLS PDDK2000200000                     | sp Q12888 TP53B_HUMAN |
| 3051 | ESEDKPEIEDVGSDEEEK2E+19                               | sp P07900 HS90A_HUMAN |
| 3052 | GQKPALDCSQVSPRPATSPENNASLSDTSPMDSSPSGIPK2. 000002E+30 | sp P18858 DNLI1_HUMAN |
| 3053 | VGPATPSAQVGK200000000                                 | sp Q13428 TCOF_HUMAN  |
| 3054 | QNPQSPQDSSVTSK200000000000                            | sp Q9UBN7 HDAC6_HUMAN |
| 3055 | APKPPTDGSTSPTSTPSEDQEALGK2000000000000000             | sp Q8NHM5 KDM2B_HUMAN |
| 3056 | SVDEVNYWDK20000000000                                 | sp P12694 ODBA_HUMAN  |
| 3057 | QKSAEPSPTVMSTSLGSLNSELDR2. 00020001E+22               | sp P49023 PAXI_HUMAN  |
| 3058 | SGPSPTTPQPLR2002000000000                             | sp Q9Y4F5 C170B_HUMAN |
| 3059 | RKSLDSESDSK200020000000                               | sp Q13185 CBX3_HUMAN  |
| 3060 | AFGPGLQGSAGSPAR20000                                  | sp P21333 FLNA_HUMAN  |
| 3061 | GILAADESTGSI AK20000000                               | sp P04075 ALDOA_HUMAN |
|      |                                                       | sp ALDOA_RABIT        |
| 3062 | KASSDSEDSSEEEEEVQGPPAK2. 20020022E+21                 | sp Q14978 NOLC1_HUMAN |
| 3063 | YQPLASTASDNDFVTPEPR3. 00000002E+19                    | sp Q15021 CND1_HUMAN  |
| 3064 | SVEEPTQPGGTGLSDSR200000000000000000                   | sp Q9H0B6 KLC2_HUMAN  |
| 3065 | SNEDSLILEK20002000000                                 | sp O94880 PHF14_HUMAN |
| 3066 | DLFDYSPPLHK2000000                                    | sp Q9NYF8 BCLF1_HUMAN |
| 3067 | KFSLDEL AGPGAEGPSNLK200000000000000000                | sp O76064 RNF8_HUMAN  |
| 3068 | SSSLGSGSSRDSISSDSETSEPLSCR2020000000000000            | sp O75164 KDM4A_HUMAN |
| 3069 | KPSTSDSDSNFEK2220020000000                            | sp P11388 TOP2A_HUMAN |



|      |                                                 |                        |
|------|-------------------------------------------------|------------------------|
| 3070 | KLSSERPSSDGEVVENGITTCNGK220000000000000000      | sp Q8N556 AFAP1_HUMAN  |
| 3071 | KRESESEDETTPAAPQLIK202000000000000000           | sp O60832 DKC1_HUMAN   |
| 3072 | ILDNPNTGEPAPVLSSPPPADVSTFLAFPSPEK2E+19          | sp P46060 RAGP1_HUMAN  |
| 3073 | GLSASLPDLSENWIEVK2000000000000000               | sp Q6PKG0 LARP1_HUMAN  |
| 3074 | TSPSSPAPLPHQEATPR202000000000000000             | sp P04920 B3A2_HUMAN   |
| 3075 | SSSSSSGGGLLPYPR200002000000000000               | sp O60293 ZC3H1_HUMAN  |
| 3076 | LPDSPALAK2000000                                | sp Q13586 STIM1_HUMAN  |
| 3077 | KKEPAITSQNSPEAR200000000                        | sp P23193 TCEA1_HUMAN  |
| 3078 | SPGEPGGAAPER2000000000000000                    | sp Q96EB6 SIR1_HUMAN   |
| 3079 | KPSDSLVSASSR2000020000                          | sp Q5T0W9 FA83B_HUMAN  |
| 3080 | VLSSTSEEDPGVVK2200000000000000                  | sp Q8NI08 NCOA7_HUMAN  |
| 3081 | TASGSSVTLSDGTR2020000000000000                  | sp Q92597 NDRG1_HUMAN  |
| 3082 | ESSANNSVSPESLR20002000                          | sp Q04726 TLE3_HUMAN   |
| 3083 | SSTVAPAQPDGAESEWTDVETR2E+22                     | sp Q02241 KIF23_HUMAN  |
| 3084 | TPQEAIMDGTEIAVSPR2000                           | sp Q06587 RING1_HUMAN  |
| 3085 | LPSSPVYEDAASF2000000000000000                   | sp Q14247 SRC8_HUMAN   |
| 3086 | RGSSGSVDETLFALPAASEPVIR200000000000000000       | sp Q9NQC3 RTN4_HUMAN   |
| 3087 | SLGYHGSSYSEGVPEVSPVSSPSLTHDK2.00000002E+20      | sp Q9Y618 NCOR2_HUMAN  |
| 3088 | GQSLSNPTDDSWK2002000000000000                   | sp Q9Y6D5 BIG2_HUMAN   |
| 3089 | THDHQLESSLSPVEVFAK2002000000000000              | sp Q9H410 DSN1_HUMAN   |
| 3090 | ASSPSPLTIGTPESQR200200000000000000              | sp Q9NPI6 DCP1A_HUMAN  |
| 3091 | MEQQYESSSDGTEKLPER2220000000000000              | sp P46100 ATRX_HUMAN   |
| 3092 | YSDGDKSDDLVVDVSNEDPATPR2.00002E+22              | sp Q04726 TLE3_HUMAN   |
| 3093 | EEGSLSDTEADAVSGQLPDPTNPSAGK2E+25                | sp Q8N1G4 LRC47_HUMAN  |
| 3094 | SAESPTSPVTSETGSTFK2000000000000000              | sp Q02952 AKA12_HUMAN  |
| 3095 | SDSPEIPFQAAAGPSDGLDASSPGNSFVGLR2E+29            | sp Q12888 TP53B_HUMAN  |
| 3096 | QHEVEIPSPTQK2000                                | sp Q08499 PDE4D_HUMAN  |
| 3097 | AFAAVPTSHPPEDAPAPPTPGPAASPEQLSFR2000000000      | sp Q14160 SCRIB_HUMAN  |
| 3098 | AEQLQDAEEEKDSDNEENKDSLVDDEEEK200000002000000000 | sp Q9H1E5 TMX4_HUMAN   |
| 3099 | NLNSNLFSVNR200000                               | sp P52948 NUP98_HUMAN  |
| 3100 | LPSTSGSEGVVFR2002000000000000                   | sp P29317 EPHA2_HUMAN  |
| 3101 | NKSPAAVTEPETNK2000000000000000                  | sp O75449 KTNA1_HUMAN  |
| 3102 | HAPTYTIPLSPVLSPTLPAEAPTAQVPPSLPR2.0002E+23      | sp Q9NPI6 DCP1A_HUMAN  |
| 3103 | EVIEIEDASPTK20000                               | sp P46100 ATRX_HUMAN   |
| 3104 | GPPDFSSDEEREPTPVLGSGAAAAGR2E+21                 | sp P42167 LAP2B_HUMAN  |
| 3105 | TNSSDSERSPDLGHSTQIPR200200000000000000          | sp P42166 LAP2A_HUMAN  |
| 3106 | RQSVSPPYKEPSAYQSSTR202000000000000000           | sp Q6VY07 PACS1_HUMAN  |
| 3107 | TESPPSPSSVEDAR2002002000000000                  | sp Q9NYV4 CDK12_HUMAN  |
| 3108 | SERPPTILMTEEPSSPK2000                           | sp Q9BRK4 LZTS2_HUMAN  |
| 3109 | KGGSYSQAASSDSAQGSVSLTACK2E+22                   | sp Q5VZK9 LR16A_HUMAN  |
| 3110 | SETIQDQSLVGSSTR200000                           | sp Q09160 1A80_HUMAN   |
| 3111 | TEMKSPFNPSQDSR100200000200000000                | sp P05534 1A24_HUMAN   |
| 3112 | TASISSPSEGTPVGSYGCTPQSLPK2.02E+25               | sp P30447 1A23_HUMAN   |
| 3113 | NAEESESEAEED2020000000                          | sp P01891 1A68_HUMAN   |
| 3114 | SLSPSHLTEDR2020000000000000                     | sp P01892 1A02_HUMAN   |
| 3115 | SQSKSPTGTPAR2020200000000000                    | sp P10316 1A69_HUMAN   |
| 3116 | LASPSGSTSSGLEVVAPEGTSAPGGGPGTLDDSATICR2E+34     | sp Q9NZN5 ARHGAP_HUMAN |
| 3117 | ALEYSNGIFDCSPTSPFMGLR2002000000000000           | sp P08651 NFIC_HUMAN   |
|      |                                                 | sp Q6PKG0 LARP1_HUMAN  |
|      |                                                 | sp Q7L1Q6 BZW1_HUMAN   |
|      |                                                 | sp Q5T200 ZC3HD_HUMAN  |
|      |                                                 | sp Q13595 TRA2A_HUMAN  |
|      |                                                 | sp Q13263 TIF1B_HUMAN  |
|      |                                                 | sp Q86W92 LIPB1_HUMAN  |

|      |                                                       |                        |
|------|-------------------------------------------------------|------------------------|
|      |                                                       | sp Q9TNN7 1C05_HUMAN   |
|      |                                                       | sp Q07000 1C15_HUMAN   |
|      |                                                       | sp Q29960 1C16_HUMAN   |
|      |                                                       | sp Q29963 1C06_HUMAN   |
|      |                                                       | sp P30505 1C08_HUMAN   |
| 3118 | GGSCSQAASSNSAQGSDESLIACK2E+20                         | sp P30508 1C12_HUMAN   |
|      |                                                       | sp Q95604 1C17_HUMAN   |
|      |                                                       | sp P04222 1C03_HUMAN   |
|      |                                                       | sp Q29865 1C18_HUMAN   |
|      |                                                       | sp P30504 1C04_HUMAN   |
|      |                                                       | sp P30510 1C14_HUMAN   |
| 3119 | SSSPFLSK202000000                                     | sp Q9NYV4 CDK12_HUMAN  |
| 3120 | SYQNSPSSDDGIRPLPEYSTEK20020000000000000000            | sp Q15648 MED1_HUMAN   |
| 3121 | SGSSQELDVKPSASPQER2000000000200000                    | sp Q9UQ35 SRRM2_HUMAN  |
|      |                                                       | sp P01891 1A68_HUMAN   |
|      |                                                       | sp P10316 1A69_HUMAN   |
|      |                                                       | sp P05534 1A24_HUMAN   |
| 3122 | KGGSYSQAASSDSAQGSVDVSLTACK2000000000                  | sp P30447 1A23_HUMAN   |
|      |                                                       | sp Q09160 1A80_HUMAN   |
|      |                                                       | sp P01892 1A02_HUMAN   |
|      |                                                       | sp Q9BQE3 TBA1C_HUMAN  |
|      |                                                       | sp Q71U36 TBA1A_HUMAN  |
| 3123 | TIGGGDDSFNTFFSETGAGK20000000000000                    | sp P68363 TBA1B_HUMAN  |
|      |                                                       | sp Q6PEY2 TBA3E_HUMAN  |
|      |                                                       | sp Q13748 TBA3C_HUMAN  |
| 3124 | LADSGDGAGPSPEEK200000                                 | sp Q92917 GPKOW_HUMAN  |
| 3125 | YSDGDKSDDLVDVSNEDPATPR2E+22                           | sp Q04726 TLE3_HUMAN   |
| 3126 | MEQQYESSSDGTEKLPER2020000000000                       | sp P46100 ATRX_HUMAN   |
| 3127 | SPSPPTQHTGQPPGQPSAPQLSAPR2E+26                        | sp Q68EM7 RHG17_HUMAN  |
| 3128 | SSDSESNENEPHLPHGVSQR2E+19                             | sp Q9BQ52 RNZ2_HUMAN   |
| 3129 | GTEPSPGGTPQPSRPVSPAGPPEGVPEEAQPPR20000000000000000000 | sp Q8WUZ0 BCL7C_HUMAN  |
| 3130 | NSNSPPSPSSMNQR200200000000                            | sp Q7Z5L9 I2BP2_HUMAN  |
| 3131 | VETVSPSESPKDTIDK20200000000                           | sp Q99590 SCAFB_HUMAN  |
| 3132 | DKDVTLSPVK20000                                       | sp Q8NFC6 BD1L1_HUMAN  |
| 3133 | SEEEQSSSVKDETENVK20020000000000                       | sp P07910 HNRPC_HUMAN  |
| 3134 | LAELPAAAQPSAEDSDTEDDSEAEQTER202000000000000           | sp Q095714 HERC2_HUMAN |
| 3135 | SGEQIFTQDVRPEQLLEGK2E+19                              | sp Q8WXE0 CSKI2_HUMAN  |
| 3136 | VLQSDSETEDTNASPEK202000000020000                      | sp Q9HAW4 CLSPN_HUMAN  |
| 3137 | LENVSLSLDKSPTEK200000                                 | sp Q86W56 PARG_HUMAN   |
| 3138 | RYPSSISSSPQK200200000                                 | sp Q14157 UBP2L_HUMAN  |
| 3139 | VPPAPVPCPPSPGPSAVPSSPK2000000020000                   | sp Q095817 BAG3_HUMAN  |
| 3140 | IGHHSTSDSSAYR20000000000                              | sp P12694 ODBA_HUMAN   |
| 3141 | ASPITNDGEDEFVPSDGLDKDEYTFSPGK2E+28                    | sp Q02880 TOP2B_HUMAN  |
|      |                                                       | sp Q09160 1A80_HUMAN   |
|      |                                                       | sp P05534 1A24_HUMAN   |
| 3142 | KGGSYSQAASSDSAQGSVDVSLTACK20000000000000              | sp P30447 1A23_HUMAN   |
|      |                                                       | sp P01891 1A68_HUMAN   |
|      |                                                       | sp P01892 1A02_HUMAN   |
|      |                                                       | sp P10316 1A69_HUMAN   |
| 3143 | GYNHGQGSYSYSNSYNSPGGGGSDYNYESK20000000000000000000    | sp Q12906 ILF3_HUMAN   |
| 3144 | VKPASPVAQPK20000000                                   | sp Q96EV2 RBM33_HUMAN  |
| 3145 | KAEGEPQEE SPLK20000                                   | sp Q9NYF8 BCLF1_HUMAN  |
| 3146 | LKEEHGIELSSPR2000                                     | sp Q014647 CHD2_HUMAN  |
| 3147 | ITEVSCKSPQDPVK200000000                               | sp P46013 KI67_HUMAN   |

|      |                                                        |                       |
|------|--------------------------------------------------------|-----------------------|
| 3148 | SHILEDDENSVDISMLK200000000200000000                    | sp 075717 WDHD1_HUMAN |
| 3149 | RNSVTPLASPEPTK200000000000                             | sp Q16875 F263_HUMAN  |
| 3150 | AAFDDAIAELDTLSEESYK2000000                             | sp P62258 1433E_HUMAN |
| 3151 | SEDESETEDEEEKSQEDQEQR202000000000000000                | sp P25205 MCM3_HUMAN  |
| 3152 | LVEPHSPSPSSK20000000                                   | sp 015014 ZN609_HUMAN |
| 3153 | TPSSPLQSCPTSLSPR20000000000000                         | sp Q96AP0 ACD_HUMAN   |
| 3154 | GGGGYTCQSGSGWDEFTK20000000000                          | sp P15924 DESP_HUMAN  |
| 3155 | SSTPLPTISSAENR22000000000000000                        | sp P42166 LAP2A_HUMAN |
|      |                                                        | sp P42167 LAP2B_HUMAN |
| 3156 | YHGHSMSDPGVSYR20000002000                              | sp P29803 ODPAT_HUMAN |
|      |                                                        | sp P08559 ODPA_HUMAN  |
| 3157 | FTMDLSDSEDFSDFEKTDDEDFVPSDASPPK1.000200002E+30         | sp P11388 TOP2A_HUMAN |
| 3158 | SRSRDSGDENEPIQER202002000000000000                     | sp Q8WX93 PALLD_HUMAN |
| 3159 | SHSESASPSALSSSPNNLSPTGWSQPK2.0022E+19                  | sp P04049 RAF1_HUMAN  |
| 3160 | EHIEIIAPSPQR20000                                      | sp Q9NZJ5 E2AK3_HUMAN |
| 3161 | YLSADSGDADDSDADLGS AVK20000000000                      | sp Q15361 TTF1_HUMAN  |
| 3162 | GSSDGRGSDSEDLPHR20000000000                            | sp Q9UPQ0 LIMC1_HUMAN |
| 3163 | GSGGSSGDELREDDEPVK200220000000000000                   | sp Q7Z4V5 HDGR2_HUMAN |
| 3164 | DSSKGEDSAEETEAKPAVVAPAPVVEAVSTPSAAFPSDATAEQGPILTK2E+42 | sp Q12906 ILF3_HUMAN  |
| 3165 | GHTDTEGRPPSPPTSTPEK20000200000                         | sp Q00613 HSF1_HUMAN  |
| 3166 | GSLTPHPAACDKDGTDSAAEESSQETSK2020000000000000           | sp P55201 BRPF1_HUMAN |
| 3167 | SQSDLDDQHDYDSVASDEDTDQEPLR302002000000000000           | sp Q9Y2X7 GIT1_HUMAN  |
| 3168 | GLMAGGRPEGQYSEDEDTDTDEYKEAK2000020000000000            | sp Q9NPQ8 RIC8A_HUMAN |
| 3169 | KPSPQPSSPR2000                                         | sp 075909 CCNK_HUMAN  |
| 3170 | GDESEEEDELEVPVPSR2000000000000000                      | sp P13861 KAP2_HUMAN  |
| 3171 | SKSPKSPPEEGAVSS202000000000000000                      | sp Q01130 SRSF2_HUMAN |
| 3172 | TASRPDDIPDPSPPK22000                                   | sp Q5VZK9 LR16A_HUMAN |
| 3173 | SSPVCSTAPVETEPK2000000000000000                        | sp Q96BY7 ATG2B_HUMAN |
| 3174 | AGPTLTDENGDDLGLPPSPGDTSYQQDQVDDFHEAR2E+31              | sp Q9NQZ2 SAS10_HUMAN |
| 3175 | SLSPSHLTEDR20000000000                                 | sp Q5T200 ZC3HD_HUMAN |
| 3176 | SRSFDYNYR20000000                                      | sp 075494 SRS10_HUMAN |
| 3177 | KEENADSDDEGELQDLLSQDWR200000000000000000               | sp Q96NB3 ZN830_HUMAN |
|      |                                                        | sp P10636 TAU_HUMAN   |
| 3178 | SGYSSPGSPGTPGSR200000000                               | sp TAU_HUMAN          |
| 3179 | VHPYEDSDSSEDEVDWQDTR2022000000000000                   | sp 014730 RIOK3_HUMAN |
| 3180 | RLSTSPDVIQGHQPR200000000000                            | sp Q9Y385 UB2J1_HUMAN |
| 3181 | SASVSSISLTK20000000000                                 | sp Q07889 SOS1_HUMAN  |
| 3182 | KPSPQPSSPR200000000                                    | sp 075909 CCNK_HUMAN  |
| 3183 | IDAGTMAEPSASPSK20000                                   | sp Q8IXQ3 CI040_HUMAN |
| 3184 | SSSVGSSSSYPISPA VSR200200030000000000                  | sp Q15149 PLEC_HUMAN  |
| 3185 | SQSSEGVSSLSSSPNSLETQSQSLSR2.2E+20                      | sp 095155 UBE4B_HUMAN |
| 3186 | FSREEFPTLQAAGDQDK200000000000000000                    | sp P48634 PRC2A_HUMAN |
| 3187 | TSFVSGSDELGP IR20000000000                             | sp Q9NRY4 RHG35_HUMAN |
| 3188 | AEAPLPSPK2000                                          | sp Q09666 AHNK_HUMAN  |
| 3189 | NLSSDEATNPISR200000000000                              | sp Q7Z417 NUFP2_HUMAN |
| 3190 | GLGSSPDLELLLR220000000000                              | sp Q9NQQ7 S35C2_HUMAN |
| 3191 | LSTTPSPTSSLHEDGVEDFR2220000000000000                   | sp 094842 TOX4_HUMAN  |
| 3192 | QPPVSPLTLSPGPEAHQGFSR2000020000000000000               | sp Q6UUV7 CRTC3_HUMAN |
| 3193 | VATLNSEESDPPTYK200000000000                            | sp Q00341 VIGLN_HUMAN |
| 3194 | APSDSSLGTPSDGRPELR200200000000000000                   | sp Q15642 CIP4_HUMAN  |
| 3195 | SGSSSPDSEITELK220020000000                             | sp P17812 PYRG1_HUMAN |
| 3196 | QGSFSEDVISHK200000000000                               | sp Q9UPN3 MACF1_HUMAN |
| 3197 | VQGGVPAGSDEYEDECPHLIALSSLNR2E+19                       | sp Q9BVS4 RIOK2_HUMAN |

|      |                                                       |                       |
|------|-------------------------------------------------------|-----------------------|
| 3198 | AASSSPGSPVASSPSR2200000000000                         | sp Q92538 GBF1_HUMAN  |
| 3199 | SPPASPESWK20002000000                                 | sp Q96JM3 CHAP1_HUMAN |
| 3200 | EGAASPAPETPQPTSPETSPK200002000                        | sp Q9Y3X0 CCDC9_HUMAN |
| 3201 | QRPSYDIFEDSDDSEPGPPAPR2002000000000                   | sp Q9UMN6 KMT2B_HUMAN |
| 3202 | KKASSDSEDSSEEEEEVQGPPAK2. 2020022E+20                 | sp Q14978 NOLC1_HUMAN |
| 3203 | TESPATAAETASEELDNR2000000000000000000                 | sp Q9NTJ3 SMC4_HUMAN  |
| 3204 | YHGHSMSDPGVSYSR20000002000                            | sp P08559 ODPA_HUMAN  |
| 3205 | YSHSYLSDSDTEAK202000000                               | sp P29803 ODPAT_HUMAN |
| 3206 | ESLKEEDESDDNM20000000000010                           | sp Q92614 MY18A_HUMAN |
| 3207 | SRSSSPVTELASR20220000000000                           | sp P25788 PSA3_HUMAN  |
| 3208 | LGSPKPER2000000                                       | sp Q9UQ35 SRRM2_HUMAN |
| 3209 | SAEPSPTVMSTSLGSNLSELDR2020000000000000000             | sp Q86VM9 ZCH18_HUMAN |
| 3210 | SPQGSPVLAEDSEGE200000                                 | sp P49023 PAXI_HUMAN  |
| 3211 | EVEEFSEDDDEDDSDSEAEK20000000200200000                 | sp Q99638 RAD9A_HUMAN |
| 3212 | ILDPTGEPAPVLSSPPADVSTFLAFPSPEK2000000000000020000     | sp Q9Y2W2 WBP11_HUMAN |
| 3213 | SASSDTSEELNSQDSPK20220200000000000000                 | sp P46060 RAGP1_HUMAN |
| 3214 | TSPADHGGSVGSESGSAVDSVAGEHSVSGR2. 00202002E+23         | sp 014745 NHRF1_HUMAN |
| 3215 | APSASPLALHASR202000000000                             | sp Q5T4S7 UBR4_HUMAN  |
| 3216 | VNDAEPGSPEAPQGK200000000                              | sp Q8N3F8 MILK1_HUMAN |
| 3217 | SLGYHGSSYSPEGVEPVSPVSSPSLTHDK2. 00000002002E+20       | sp Q8N8A6 DDX51_HUMAN |
| 3218 | EEETSIDVAGKPNEVTK20000000000000                       | sp Q9Y618 NCOR2_HUMAN |
| 3219 | SLSPGKENSALDMEK2020000000000000                       | sp P53985 MOT1_HUMAN  |
| 3220 | RPTPQDSPIFLPVDDTSFR20000000000000                     | sp Q9H307 PININ_HUMAN |
| 3221 | KPLAAPGDGEGLGQTAQPSPPAR200000                         | sp P49327 FAS_HUMAN   |
| 3222 | SPPKSPEEEGAVSS200020000000020                         | sp Q9Y4F5 C170B_HUMAN |
| 3223 | SPQGSPVLAEDSEGE20000000000200000                      | sp Q01130 SRSF2_HUMAN |
| 3224 | LSSSLGR20000                                          | sp Q99638 RAD9A_HUMAN |
| 3225 | VDDDSLGEFPVTNSR200000000000                           | sp Q9BST9 RTKN_HUMAN  |
| 3226 | TLTDEVNSPDSRRR20000000                                | sp Q92785 REQU_HUMAN  |
| 3227 | GRLTPSPDIVLSDNEASSPR20000002000002000                 | sp Q8TAQ2 SMRC2_HUMAN |
| 3228 | MEEEGTEDNGLEDDSR200                                   | sp Q8WXI9 P66B_HUMAN  |
| 3229 | LKFSDEEDGRDSDEEGAEGHR2000000020000000000              | sp Q14151 SAFB2_HUMAN |
| 3230 | HGGSPQPLATTPLSQEPVNPPEASPTR2E+25                      | sp P48634 PRC2A_HUMAN |
| 3231 | ASESSSEEKDDYEIFVK20022000000000000                    | sp Q9UQ35 SRRM2_HUMAN |
| 3232 | SPAPLLHVAALGQK2000000000000000                        | sp P18583 SON_HUMAN   |
| 3233 | DDISEIQLASDHSGR2002002000                             | sp Q8N163 CCAR2_HUMAN |
| 3234 | KGGSYSQAASSDSAQGSVDVSLTACK2E+20                       | sp Q07157 ZO1_HUMAN   |
| 3235 | SYQNSPSSDDGIRPLPEYSTEK2. 0000002E+22                  | sp P01891 1A68_HUMAN  |
| 3236 | METEADAPSPAPSLGER2000000000                           | sp P01892 1A02_HUMAN  |
| 3237 | DTSPSSGSAVSSSK2000000000000                           | sp P05534 1A24_HUMAN  |
| 3238 | TVDSQGPTPVCTPTFLER2000000020000000                    | sp Q09160 1A80_HUMAN  |
| 3239 | MESEGGADDSAEEDLLDDDDNEDRGDDQLELIKDDEK1. 020000002E+38 | sp P10316 1A69_HUMAN  |
| 3240 | RPETVVPGEATETDSER202000                               | sp P30447 1A23_HUMAN  |
| 3241 | GAPSSPATGVLSPQK2000000000000000                       | sp Q15648 MED1_HUMAN  |
| 3242 | FFTTGSDSESESSLGEEELVTKPVGGNYGK2. 020202202E+25        | sp Q12873 CHD3_HUMAN  |
| 3243 | DELHIVEAEAMNYEGSPIK30000000                           | sp Q8NEY8 PPHLN_HUMAN |
|      |                                                       | sp Q9BYG3 MK67I_HUMAN |
|      |                                                       | sp P07910 HNRPC_HUMAN |
|      |                                                       | sp Q6QNY0 BL1S3_HUMAN |
|      |                                                       | sp Q5SRE5 NU188_HUMAN |
|      |                                                       | sp B5ME19 EIFCL_HUMAN |
|      |                                                       | sp Q99613 EIF3C_HUMAN |
|      |                                                       | sp P06748 NPM_HUMAN   |

|      |                                               |                       |
|------|-----------------------------------------------|-----------------------|
| 3244 | DSSTSPGDYVLSVSENSR20000000000000              | sp P46108 CRK_HUMAN   |
| 3245 | SEAGHASSPDSEVTSLCQK20000000000000             | sp Q6NZY4 ZCHC8_HUMAN |
| 3246 | VGSSKPDSSPVLSPGNK2000000000                   | sp Q8N4C8 MINK1_HUMAN |
| 3247 | SPGSPGPPELPIETALDDR2000000000000000           | sp Q8TEW0 PARD3_HUMAN |
| 3248 | GTSRPPPEGGLGYSQLGDDDLK2E+20                   | sp P21127 CD11B_HUMAN |
| 3249 | SPATSPISSNSHR20020000000000                   | sp Q9UQ88 CD11A_HUMAN |
| 3250 | DDISEIQSLASDHSGR2002000                       | sp Q9NR09 BIRC6_HUMAN |
| 3251 | ASESTARSSSESEDEDVIPATQCLTPGIR2. 22202E+23     | sp Q07157 ZO1_HUMAN   |
|      |                                               | sp Q13428 TCOF_HUMAN  |
|      |                                               | sp P05534 1A24_HUMAN  |
|      |                                               | sp P30447 1A23_HUMAN  |
|      |                                               | sp P01891 1A68_HUMAN  |
| 3252 | GGSYSQAASSDSAQGSVSLTACKV20020000000           | sp P01892 1A02_HUMAN  |
|      |                                               | sp Q09160 1A80_HUMAN  |
|      |                                               | sp P10316 1A69_HUMAN  |
| 3253 | KPSPEPEGEVGPPK20000000000000                  | sp Q7Z5L9 I2BP2_HUMAN |
| 3254 | GYSPYVSGSGSTAGSR200000000000                  | sp Q15149 PLEC_HUMAN  |
| 3255 | VQEHEDSGDSEVENEAK200000000000                 | sp Q9Y5J1 UTP18_HUMAN |
| 3256 | CTLPEHESPSQDISDACEAESTER2E+23                 | sp Q32MZ4 LRRF1_HUMAN |
| 3257 | CPEILSDESSSDEDEKK2002220000000                | sp P35659 DEK_HUMAN   |
| 3258 | GIQYIDLSSDSEDVVPNCSTVQEK202000000000000000    | sp Q9H4L7 SMRCD_HUMAN |
| 3259 | SRSPLDKDTYPPSASVVGASVGGHR202000000000000      | sp Q96T37 RBM15_HUMAN |
| 3260 | AMSTTSSPPQPGK20000000000000                   | sp Q9UJU6 DBNL_HUMAN  |
| 3261 | SPVSTRPLPSASQK2000000000000000                | sp Q8ND56 LS14A_HUMAN |
| 3262 | STAPSAASASASAAASSPAGGGAEEALLEHCGVCR2E+20      | sp Q13263 TIF1B_HUMAN |
| 3263 | SVVSDLEADDVK2000000000                        | sp P11388 TOP2A_HUMAN |
| 3264 | TDSV I IADQTPPTR20000                         | sp P17544 ATF7_HUMAN  |
| 3265 | GNIETSEDEDDTADLFPEESGFEHAWR2. 2000002E+23     | sp Q9H501 ESF1_HUMAN  |
| 3266 | TNSDSALHQSTMPTQPESFSSGSQDVHQK2E+21            | sp Q6UUV9 CRTC1_HUMAN |
| 3267 | ALQLSNSPGASSAFLK200000000000                  | sp Q12802 AKP13_HUMAN |
| 3268 | AGSPLCNSNLQDSEEDIEPSYSLFR2000000000000000     | sp Q9NRY4 RHG35_HUMAN |
| 3269 | ESESEDETTPAAPQLIK2020000000000000             | sp O60832 DKC1_HUMAN  |
| 3270 | SLSSSLDDTEVKK20000000000000                   | sp O95292 VAPB_HUMAN  |
| 3271 | AKSPTSPSPPR20200020000                        | sp Q8IYB3 SRRM1_HUMAN |
| 3272 | VNPHKVPASSVDSNIPSSQGYK200220000000000000      | sp Q9UHB7 AFF4_HUMAN  |
| 3273 | ATVTPSPVK20000                                | sp Q9H1E3 NUCKS_HUMAN |
| 3274 | LGSTSGEESDLER2220000000000                    | sp Q9BW71 HIRP3_HUMAN |
| 3275 | VKEEHLDVASPDKASSPELPSVENIK220000000000000     | sp Q969R5 LMBL2_HUMAN |
| 3276 | LIESLSPDFCHQNK2000000000                      | sp Q9H6R7 CBO44_HUMAN |
| 3277 | YNLDASEEEDSNKK2000000000                      | sp O95218 ZRAB2_HUMAN |
| 3278 | VTAGWPSEPGQDLNPESPAALGQDLLEPR2000000000000000 | sp Q92766 RREB1_HUMAN |
| 3279 | SPAPGSPDEEGGAEAPAAGIR2E+21                    | sp O15061 SYNEM_HUMAN |
| 3280 | KGSSGNASEVSVACLTER2000000000000000            | sp Q69YQ0 CYTSA_HUMAN |
| 3281 | TRPGSFQSLSDALSDTPAK200000000000               | sp Q9H9C1 SPE39_HUMAN |
| 3282 | SPAQILISLESEER2000000000000000                | sp P11532 DMD_HUMAN   |
| 3283 | MKPPAACAGMADAASPCSVNDLR200000000000           | sp P52888 THOP1_HUMAN |
| 3284 | AEAPSSPDVAPAGK2000000000                      | sp Q9P1Y6 PHRF1_HUMAN |
| 3285 | DLSEVSETTESTDVK20020000000000                 | sp P41227 NAA10_HUMAN |
| 3286 | VDSPSHGLVTSSLCIPSPAR20000000000000000000      | sp Q9UER7 DAXX_HUMAN  |
| 3287 | LSSLRSTSK200020000                            | sp P62753 RS6_HUMAN   |
| 3288 | TSGGDHAPDPSGENSPAPQGR2000000000000000         | sp Q96NY9 MUS81_HUMAN |
| 3289 | DHNVGSPKSPHASPQHTQTEK20002000000000000000     | sp A0JNW5 UH1BL_HUMAN |
| 3290 | TLSTHSVPNISGATCSAFASPFGPCPYSHR2. 00002E+24    | sp P28290 SSFA2_HUMAN |
| 3291 | SPISDNSGCDAPGNSNPSLSPSSAESEK2E+26             | sp Q99590 SCAFB_HUMAN |

|      |                                                      |                       |
|------|------------------------------------------------------|-----------------------|
| 3292 | QRPDLGSAQK20000                                      | sp P33991 MCM4_HUMAN  |
| 3293 | TEMKSPFNPSQDSR2000000000000000                       | sp P08651 NFIC_HUMAN  |
| 3294 | ASVALTPTAPSR200020000000                             | sp P28290 SSFA2_HUMAN |
| 3295 | QKSDAEEDGGTVSQEEDRKP2E+20                            | sp P27824 CALX_HUMAN  |
| 3296 | LDFIESDPCSSEALSK2000000000                           | sp 043432 IF4G3_HUMAN |
| 3297 | KWDGSEEDNSK2000000000                                | sp 060841 IF2P_HUMAN  |
| 3298 | GPSPSSPTPPAAAAPAEQAPR200000000000000000              | sp Q86VQ1 GLC11_HUMAN |
|      |                                                      | sp Q641Q2 FA21A_HUMAN |
| 3299 | SRPTSFADELAAR20002000000000                          | sp Q9Y4E1 FA21C_HUMAN |
|      |                                                      | sp Q5SNT6 FA21B_HUMAN |
| 3300 | SLSPGKENVSAIDMEK2020000000001000                     | sp Q9H307 PININ_HUMAN |
| 3301 | SSSPAPADIAQTVQEDLR220000000000000000                 | sp Q13283 G3BP1_HUMAN |
| 3302 | IPSEMPSPNFGK2000000                                  | sp Q9H2J7 S6A15_HUMAN |
| 3303 | GSGTASDDEFENLR202000000000                           | sp Q7Z6Z7 HUWE1_HUMAN |
| 3304 | IHDLEDDLEMSDASDASGEEGRVPK220020020000000000          | sp P35269 T2FA_HUMAN  |
| 3305 | NTSVGSTSTGVESILEPCDEIEQK2E+22                        | sp Q5T8I3 F102B_HUMAN |
| 3306 | KSPAQSPNPSTPR2000200000000                           | sp 076021 RL1D1_HUMAN |
|      |                                                      | sp TAU_HUMAN          |
| 3307 | TDHGAEIVYKSPVSGDTSR200020000000                      | sp P10636 TAU_HUMAN   |
| 3308 | AAQQSDSDGEALGGNPMVAGFQDDVDLEDQPR2.020000000001E+28   | sp Q3YEC7 RABL6_HUMAN |
| 3309 | GAASTLVPGVSETSASPGSPSVR200000                        | sp Q6ZRS2 SRCAP_HUMAN |
| 3310 | TQSPGGCSAEAVLAR20000200000000                        | sp Q96MH2 HEX12_HUMAN |
| 3311 | SSDEENGPPSPDLDR220000000000000000                    | sp Q96B36 AKTS1_HUMAN |
| 3312 | NYQQNYQNSSEGEKNEGSESAPEGQAQR3.00000000002E+24        | sp P67809 YBOX1_HUMAN |
| 3313 | SGSSPDSEITELKFPSINH22002000000000000000              | sp P17812 PYRG1_HUMAN |
| 3314 | METVSNASSSNPSSPGR1000000000000200000                 | sp Q9NTI5 PDS5B_HUMAN |
| 3315 | APGSPAAPR2000000                                     | sp Q9NQX5 NPDC1_HUMAN |
| 3316 | ESEDKPEIEDVGSDEEEK20000000000000000000               | sp P07900 HS90A_HUMAN |
| 3317 | DMPGGFLFEGLSDDDDFHPNTR1.000000002E+22                | sp Q96S82 UBL7_HUMAN  |
| 3318 | VTTEIQLPSQSPVEEQSPASLSSLR2E+23                       | sp Q8WWI1 LMO7_HUMAN  |
| 3319 | NYQQNYQNSSEGEKNEGSESAPEGQAQR200000000000             | sp P67809 YBOX1_HUMAN |
| 3320 | SSSPTAGPSTEGAEGPEEK2.2E+19                           | sp Q8NHM5 KDM2B_HUMAN |
| 3321 | RPTETNPVTSNSDEECNETVK2200000000000000                | sp P46100 ATRX_HUMAN  |
| 3322 | AAVQELSSILAGEDPEER2200000000000000                   | sp P49768 PSN1_HUMAN  |
| 3323 | VDSPSHGLVTSSLCIPSPAR200000000000020000               | sp Q9UER7 DAXX_HUMAN  |
| 3324 | FVSEGDGGR20000000                                    | sp Q53EL6 PDCD4_HUMAN |
| 3325 | STQIENQHGAQDTSDLMSPSKR200000                         | sp Q9NVR2 INT10_HUMAN |
| 3326 | GPPDFSSDEEREPTPVLGSGAAAAGR20000000000000             | sp P42167 LAP2B_HUMAN |
|      |                                                      | sp P42166 LAP2A_HUMAN |
| 3327 | AGAASPLNSPLSSAVPSLGK200020000000000000               | sp 075962 TRIO_HUMAN  |
| 3328 | YSDGDKSDDLVDVSNEDPATPR2E+22                          | sp Q04726 TLE3_HUMAN  |
| 3329 | DDSFDSLDSFGSR200200000000                            | sp Q9UPQ0 LIMC1_HUMAN |
| 3330 | EEGELEDGEISDDNNSQIR200000000000                      | sp 060293 ZC3H1_HUMAN |
| 3331 | AVSEGCASEDEVEGEA2000020000000000                     | sp Q9BYX2 TBD2A_HUMAN |
| 3332 | GGLSPANDTGAK2000000000                               | sp P30419 NMT1_HUMAN  |
| 3333 | SVSASSGPCSPAAPHPPPPPR2.00022E+21                     | sp Q86UY5 FA83A_HUMAN |
| 3334 | SGAQASSTPLSPTR20020000                               | sp P02545 LMNA_HUMAN  |
|      |                                                      | sp 014950 ML12B_HUMAN |
| 3335 | ATSNVFMFDQSQIQEFK200001000000000000                  | sp P19105 ML12A_HUMAN |
|      |                                                      | sp P24844 MYL9_HUMAN  |
| 3336 | SRSFDYNYR2020000000                                  | sp 075494 SRS10_HUMAN |
| 3337 | YGPADVEDTTGSGATDSKDDDDIDLFGSDDEESEEAKR20000000000000 | sp P24534 EF1B_HUMAN  |
| 3338 | EYVSNDAAQSDDEEKLQSQPTDTDGGR2E+24                     | sp Q5JSH3 WDR44_HUMAN |

|      |                                        |                       |
|------|----------------------------------------|-----------------------|
| 3339 | IDISPSTFR2000000                       | sp Q9Y2W1 TR150_HUMAN |
| 3340 | NVRSDISDQEDEESEGC                      | sp Q15154 PCM1_HUMAN  |
|      | PVSINLSK2.00200000002E+23              | sp P30510 1C14_HUMAN  |
|      |                                        | sp Q29865 1C18_HUMAN  |
|      |                                        | sp P30504 1C04_HUMAN  |
|      |                                        | sp Q9TNN7 1C05_HUMAN  |
|      |                                        | sp P04222 1C03_HUMAN  |
| 3341 | GGSCSQAASSNSAQGSDES                    | sp Q07000 1C15_HUMAN  |
|      | LIACKA20020000000                      | sp Q29960 1C16_HUMAN  |
|      |                                        | sp Q29963 1C06_HUMAN  |
|      |                                        | sp P30505 1C08_HUMAN  |
|      |                                        | sp P30508 1C12_HUMAN  |
|      |                                        | sp Q95604 1C17_HUMAN  |
| 3342 | VVFSDESSEEDLSAEMTEDE                   | sp Q15021 CND1_HUMAN  |
|      | TPKK2.2002200000001E+22                | sp Q96QT6 PHF12_HUMAN |
| 3343 | TTSPSSDTLLDR200000000000               | sp P49321 NASP_HUMAN  |
| 3344 | EGEETEGSEEDDKENDKTE                    | sp Q96B36 AKTS1_HUMAN |
|      | EMPNDVLENK2.002E+26                    | sp Q5T200 ZC3HD_HUMAN |
| 3345 | TEARSSDEENGPPSSPDLDR                   | sp P35269 T2FA_HUMAN  |
|      | 20000000022000000                      | sp Q14244 MAP7_HUMAN  |
| 3346 | LRSPNSAHR2000000000                    | sp Q16204 CCDC6_HUMAN |
| 3347 | IHDLEDDLEMSSDASDASG                    | sp P46013 KI67_HUMAN  |
|      | EEGRVPK1220020020000000000             | sp Q5T200 ZC3HD_HUMAN |
| 3348 | RLSSSSATLLNSPDR20000000020000          | sp Q9P1T7 MDF1C_HUMAN |
| 3349 | LDQPVSAPPSPR20002000                   | sp P07910 HNRPC_HUMAN |
| 3350 | IPCDSPQSDPVDTPSTK200000000000000       | sp Q69YN4 VIR_HUMAN   |
| 3351 | STSPAGQHHSPISSR20000002000000          | sp O60841 IF2P_HUMAN  |
| 3352 | IQSSLSVNSDISK200200000                 | sp Q02880 TOP2B_HUMAN |
| 3353 | MESEGGADDSAEGLDLLDD                    | sp Q9HC35 EMAL4_HUMAN |
|      | DDNEDRGDDQLELIKDDEK2.0000002E+36       | sp Q8NDT2 RB15B_HUMAN |
| 3354 | SFLSESPSPGR20000                       | sp O75179 ANR17_HUMAN |
| 3355 | WDGSEEDDNSKK20000000000                | sp P02545 LMNA_HUMAN  |
| 3356 | KVVEAVNSDSDSEFGIPK202000000000         | sp P30510 1C14_HUMAN  |
| 3357 | APVSTESVIQSNTPTPPSQ                    | sp Q29865 1C18_HUMAN  |
|      | PLNETAEESR2.2E+28                      | sp P30504 1C04_HUMAN  |
| 3358 | RNSLEGYSR20000000                      | sp Q9TNN7 1C05_HUMAN  |
| 3359 | EHYPVSSPSPSPAQPGGVS                    | sp P04222 1C03_HUMAN  |
|      | R2000000000000000000000000             | sp Q07000 1C15_HUMAN  |
| 3360 | SGAASSTPLSPTR200020000                 | sp Q29960 1C16_HUMAN  |
|      |                                        | sp Q29963 1C06_HUMAN  |
|      |                                        | sp P30505 1C08_HUMAN  |
|      |                                        | sp P30508 1C12_HUMAN  |
|      |                                        | sp Q95604 1C17_HUMAN  |
| 3361 | GGSCSQAASSNSAQGSDES                    | sp Q7Z2W4 ZCCHV_HUMAN |
|      | LIACK20020000000                       | sp Q5T200 ZC3HD_HUMAN |
|      |                                        | sp Q8WYL5 SSH1_HUMAN  |
|      |                                        | sp Q9HCD5 NCOA5_HUMAN |
|      |                                        | sp O75475 PSIP1_HUMAN |
|      |                                        | sp Q7Z4S6 KI21A_HUMAN |
|      |                                        | sp P22059 OSBP1_HUMAN |
|      |                                        | sp Q01433 AMPD2_HUMAN |
|      |                                        | sp Q9P2B4 CT2NL_HUMAN |
|      |                                        | sp P67809 YBOX1_HUMAN |
|      |                                        | sp P25054 APC_HUMAN   |
| 3362 | ASLEDAPVDDLTR2000000000000             |                       |
| 3363 | TPSPPPPPIPEDIALGKK2020000000000000000  |                       |
| 3364 | SSSSDSIHSVR2000000000                  |                       |
| 3365 | SSTDSLPGPISR20200000000                |                       |
| 3366 | TGVTSTSDSEEGDDQEGEK22000000000000000   |                       |
| 3367 | EKELSPPPGLPSK2000000000                |                       |
| 3368 | TGSNISGASSDISLDEQYK2000002200200000000 |                       |
| 3369 | TDSDDLQLYK2000000000                   |                       |
| 3370 | FQSQADQDQQASGLQSPPSR200000             |                       |
| 3371 | NYQQNYQNSGESGEK2000000                 |                       |
| 3372 | SGECSVPVPMGSFPR2000200000000000        |                       |

|      |                                                              |    |        |             |
|------|--------------------------------------------------------------|----|--------|-------------|
| 3373 | SLDLGIIAEVK2000000000000                                     | sp | P08729 | K2C7_HUMAN  |
| 3374 | VDSPSHGLVTSSLCIPSPAR2000000000000000                         | sp | Q9UER7 | DAXX_HUMAN  |
| 3375 | AGVRPSSSGSAWEACSEAPSK2000000000000000                        | sp | Q12789 | TF3C1_HUMAN |
| 3376 | YSPTSPTYSPPTPK300000002000000                                | sp | P24928 | RPB1_HUMAN  |
| 3377 | KEDSDEEEDDDSEDEEDEDDEDEDEDEIEPAAMK2.00000002E+32             | sp | P19338 | NUCL_HUMAN  |
| 3378 | LEDAESSNPNLQSLSTDALPSASK2E+19                                | sp | Q9Y294 | ASF1A_HUMAN |
| 3379 | HRSPPATPPPK2000200000                                        | sp | Q8IYB3 | SRRM1_HUMAN |
| 3380 | KSDGACDSPSSDKENSSQIAQDHQK2.00000202E+24                      | sp | Q9UIG0 | BAZ1B_HUMAN |
| 3381 | GQKPALDCSQVSPRPATSPENNASLSDTSPMDSPPSGIPK20000000000000000000 | sp | P18858 | DNLI1_HUMAN |
| 3382 | SSSSGSDDYAYTQALLLHQR30000000000000                           | sp | Q8N5C8 | TAB3_HUMAN  |
| 3383 | SVSPCSNVESR202000000000                                      | sp | Q9UQ35 | SRRM2_HUMAN |
| 3384 | LMHNASDSEVDQDDVVEWK10002020000000000000                      | sp | Q9H2P0 | ADNP_HUMAN  |
| 3385 | AGMSSNQSISSPVLDAVPR10200000200000000000                      | sp | Q9UQ35 | SRRM2_HUMAN |
| 3386 | EFVSSDESSGENK220002000000                                    | sp | Q08945 | SSRP1_HUMAN |
| 3387 | LPLQESEEEER2000000                                           | sp | P23497 | SP100_HUMAN |
| 3388 | EILSPVDIIDR200000000                                         | sp | O14495 | LPP3_HUMAN  |
| 3389 | SNSPLPVPPSK202000000000                                      | sp | Q13247 | SRSF6_HUMAN |
| 3390 | GLMAGGRPEGQYSEDEDTDDEYK20000200000000                        | sp | Q9NPQ8 | RIC8A_HUMAN |
| 3391 | STPESGSDKESVGSSTSNEGGR2.002E+23                              | sp | Q6GQQ9 | OTU7B_HUMAN |
| 3392 | LQLSPWESSVNR20000000000                                      | sp | Q14244 | MAP7_HUMAN  |
| 3393 | SFAGNLNTYK20000000000                                        | sp | Q01813 | PFKAP_HUMAN |
| 3394 | RAGDLEDSPK2000                                               | sp | P51858 | HDFG_HUMAN  |
| 3395 | TGSPGSPGAGGVQSTAK2000000000000                               | sp | O43237 | DC1L2_HUMAN |
| 3396 | GPPDFSSDEEREPTPVLGSGAAAAGR2.00000002E+21                     | sp | P42166 | LAP2A_HUMAN |
| 3397 | YLVGDKPNAGSEEISSEDELVEEK3E+26                                | sp | P42167 | LAP2B_HUMAN |
| 3398 | KTAVQYIESSDSEEIETSELPQK2202000000000000                      | sp | Q9NY61 | AATF_HUMAN  |
| 3399 | SDSQASLTVPLSPQVVR2000000002000000                            | sp | Q14527 | HLTF_HUMAN  |
| 3400 | SHSPSASQSGQLR2000000000000                                   | sp | Q8TEV9 | SMCR8_HUMAN |
| 3401 | SGGSGHAVAEPASPEQELDQNK2.00000002E+19                         | sp | Q8WWI1 | LMO7_HUMAN  |
| 3402 | AAGDSGEDSDSDYENLIDPTEPSNSEYSHSK2.00203E+24                   | sp | P46013 | KI67_HUMAN  |
| 3403 | RPSSTSVPLGDK20000000000                                      | sp | Q15018 | F175B_HUMAN |
| 3404 | LEGSDDLLEDSSEEHSR202000000                                   | sp | Q9NXR1 | NDE1_HUMAN  |
| 3405 | GHSSLTNSPLDSSCK200000000                                     | sp | Q9NR09 | BIRC6_HUMAN |
| 3406 | SHSDASVGSSTESEHGSSSPR2000                                    | sp | Q9Y6Q9 | NCOA3_HUMAN |
| 3407 | AESPAEKVPEESVPLVQK20000000000000000000                       | sp | Q6XZF7 | DNMBP_HUMAN |
| 3408 | AKEVELVSE200                                                 | sp | Q9UKV3 | ACINU_HUMAN |
| 3409 | TSPLKDNPSPEPQLDDIKR20000002000000000000                      | sp | O60832 | DKC1_HUMAN  |
| 3410 | SIDTQTPSVQER2000020000000                                    | sp | Q96JC9 | EAF1_HUMAN  |
| 3411 | RLSQPESAEK200000000                                          | sp | Q86VQ1 | GLCI1_HUMAN |
| 3412 | SKFDSDEEEDTENVEAASSGKVTR2E+25                                | sp | Q9UKV3 | ACINU_HUMAN |
| 3413 | EGMNPSYDEYADSDQHDAYLER1.0003000002E+22                       | sp | Q8TF01 | PNISR_HUMAN |
| 3414 | DVQSPGFLNEPLSSK2000000000000                                 | sp | Q08945 | SSRP1_HUMAN |
| 3415 | SASSDTSEELNSQDSPPK20200000000000000000                       | sp | Q8NG31 | CASC5_HUMAN |
| 3416 | SPVQLEEAPFSR20000000000000                                   | sp | O14745 | NHRF1_HUMAN |
| 3417 | RLSDCESTDVK20000000000                                       | sp | Q9BZL4 | PP12C_HUMAN |
| 3418 | SSSLDGEHHDGYHR2000000000000                                  | sp | Q7Z333 | SETX_HUMAN  |
| 3419 | SSSPGKPAVSSLNSSHRSR2E+19                                     | sp | Q9C0J8 | WDR33_HUMAN |
| 3420 | QGSITSPQANEQSVTPQR20020000000020000                          | sp | Q9UHB7 | AFF4_HUMAN  |
| 3421 | SPGNTSQPPAFFSK2000000000000000                               | sp | Q9UQ35 | SRRM2_HUMAN |
| 3422 | IAQVSPGPR200000                                              | sp | Q9Y618 | NCOR2_HUMAN |
| 3423 | LTGSTSSLNK20000000                                           | sp | Q9NQS7 | INCE_HUMAN  |
| 3424 | KSSISSISGR200000000                                          | sp | Q9NV70 | EXOC1_HUMAN |
|      |                                                              | sp | Q86SQ0 | PHLB2_HUMAN |



|      |                                                           |                       |
|------|-----------------------------------------------------------|-----------------------|
| 3425 | SPEAVGSECPSR2000000000000                                 | sp Q9Y4K1 AIM1_HUMAN  |
| 3426 | EEDEEPESPPEKK2000000                                      | sp Q9H1E3 NUCKS_HUMAN |
| 3427 | LLKPGEEPSEYTDEEDTK20000000000                             | sp O15173 PGR2_HUMAN  |
| 3428 | GTSRPPPEGGLGYSQLGDDDLK2. 2E+21                            | sp P21127 CD11B_HUMAN |
|      |                                                           | sp Q9UQ88 CD11A_HUMAN |
| 3429 | GLNSQSSDHLNKR200200000000                                 | sp Q96HA1 P121A_HUMAN |
|      |                                                           | sp A8CG34 P121C_HUMAN |
| 3430 | QISLPDLSQEEPQLK2000000000000                              | sp Q15390 MTFR1_HUMAN |
| 3431 | SRPTSEGSDIESTEPQK2000000000000000000                      | sp Q4G0J3 LARP7_HUMAN |
| 3432 | SGSSPDSEITELKFPSINHD20000000000000000                     | sp P17812 PYRG1_HUMAN |
| 3433 | LLDLSdstsvasfPSADETDGNLPESR2. 002E+19                     | sp Q13464 ROCK1_HUMAN |
| 3434 | NLEHLSSFSDEDDPGYSQDAYK2002000000000000000                 | sp Q2KHR3 QSER1_HUMAN |
| 3435 | AGMSSNQSISSPVLDAVPR20000020000000000                      | sp Q9UQ35 SRRM2_HUMAN |
| 3436 | TASFSESR2000000                                           | sp P53396 ACLY_HUMAN  |
| 3437 | STSAPQMSPGSSDNQSSSPQPAQQK2. 0001E+23                      | sp Q14157 UBP2L_HUMAN |
| 3438 | SPGLVPPSPEFAPR200000020000000                             | sp Q9H5H4 ZN768_HUMAN |
| 3439 | SPQPDPVGTPTIFKPKQSK20000000200000000000                   | sp P46013 KI67_HUMAN  |
| 3440 | SASLYPDR20000000                                          | sp Q6P4Q7 CNNM4_HUMAN |
| 3441 | LDSSPVSSPR20000000                                        | sp O60293 ZC3H1_HUMAN |
| 3442 | RGSGSACSLCCCGR200000000000000                             | sp Q9GZU1 MCLN1_HUMAN |
| 3443 | AVATAAAQQTGPEEDSGSSEEEESDSEEEAETLAQVKPSGK2. 022000202E+25 | sp Q13428 TCOF_HUMAN  |
| 3444 | QLPALDGSLMGPEPPAQEEEEAPVSPHK2E+21                         | sp Q8N9T8 KRI1_HUMAN  |
| 3445 | DHSPTPSVFNSDEER2000000000                                 | sp Q6UN15 FIP1_HUMAN  |
| 3446 | DTVIIVSEPEDEESQGLPTMAR200200000000001000                  | sp Q9H4L7 SMRCD_HUMAN |
| 3447 | DEVFHTDQDDPSSSDDEGMPYTRPVK220000000000000                 | sp Q5JSH3 WDR44_HUMAN |
| 3448 | SASEPSLHR20000000                                         | sp P10398 ARAF_HUMAN  |
|      |                                                           | sp P04049 RAF1_HUMAN  |
| 3449 | ESTSSKSPPR20000                                           | sp P78347 GTF2I_HUMAN |
| 3450 | ELDDSSSESSDLQLEGPSTLR2022000000000000000                  | sp P29590 PML_HUMAN   |
| 3451 | SQSLPGADSLAKPIDK2000000000000000000                       | sp Q9Y4A5 TRRAP_HUMAN |
| 3452 | DHASQLSPVLSR2000000                                       | sp Q8IXZ2 ZC3H3_HUMAN |
| 3453 | QNSVQEQPGTACLK2000000000000000000                         | sp Q9NQW6 ANLN_HUMAN  |
| 3454 | TASGSSVTSLDGTR22020000000                                 | sp Q92597 NDRG1_HUMAN |
| 3455 | SPGAGSLGSPASQR2000000                                     | sp P53667 LIMK1_HUMAN |
| 3456 | SEGSEYEEIPK2000000000000                                  | sp P48634 PRC2A_HUMAN |
| 3457 | IDISPSTLR2000000                                          | sp Q9NYF8 BCLF1_HUMAN |
| 3458 | YSPTSPTYSPVYTPSPK2020000000000000000                      | sp P24928 RPB1_HUMAN  |
| 3459 | SRSRSTPPSSAGLGSNSAPPIDSR2. 0202020022E+26                 | sp Q8IWX8 CHERP_HUMAN |
| 3460 | ASPITNDGEDEFVPSDGLDKDEYTFSPGK2. 0000000000002E+28         | sp Q02880 TOP2B_HUMAN |
| 3461 | VGVSSKPDSSPVLSPGNK20000000000                             | sp Q8N4C8 MINK1_HUMAN |
| 3462 | TIQNSSVSPTSSSSSSSSTGETQTQSSSR2E+25                        | sp Q7Z417 NUFP2_HUMAN |
| 3463 | SPSPAPAPAAAAAGPPTRK2. 02E+20                              | sp Q9H7N4 SFR19_HUMAN |
| 3464 | SPEPGQWTR20000000000                                      | sp Q09666 AHNK_HUMAN  |
| 3465 | RTDALTSPPGR200000                                         | sp P49736 MCM2_HUMAN  |
| 3466 | SSPGPDTLVVLEFNASK200000000000000000000                    | sp O60303 K0556_HUMAN |
| 3467 | KLSSSEPYEEDEFNDDQSIK2. 002E+19                            | sp Q9H4L7 SMRCD_HUMAN |
| 3468 | TASISSPSEGTPVGSYGCTPQSLPK2. 22E+23                        | sp Q6PKG0 LARP1_HUMAN |
| 3469 | IACKSPQDPVDTASTK2000000000000000000                       | sp P46013 KI67_HUMAN  |
| 3470 | SHSTEPNLSSFLNDPNPMK2000000000000000000                    | sp Q9UPQ0 LIMC1_HUMAN |
| 3471 | SRSSPVTELASR202220000000000                               | sp Q9UQ35 SRRM2_HUMAN |
| 3472 | VELSPGPPKAGR200000000000                                  | sp Q8IZ73 RUSD2_HUMAN |
| 3473 | GESAPTLSTSPSSPSPTSPSPTLGR202000000                        | sp Q9H330 TM245_HUMAN |
| 3474 | KESESDSSDEPLIK2020022000000000                            | sp P35659 DEK_HUMAN   |

|      |                                              |                       |
|------|----------------------------------------------|-----------------------|
| 3475 | LSSTDDGYIDLQFK2020000000000                  | sp Q96A57 TM230_HUMAN |
| 3476 | SPHQLLSPSSFPSATPSQK2.00000202E+20            | sp Q14181 DPOA2_HUMAN |
| 3477 | HIVSNDSSDDESHEPK2002000000000                | sp P47712 PA24A_HUMAN |
| 3478 | RNSSEASSGDFLDLK2200000000000                 | sp Q9UK76 HN1_HUMAN   |
| 3479 | SQSIEQESQEK2020000000000                     | sp Q5VTL8 PR38B_HUMAN |
| 3480 | LHVGNISPTCTNK20000000                        | sp Q9BWF3 RBM4_HUMAN  |
| 3481 | RPSQEQSASASSGQPAPLNR2000000000000            | sp Q5T1M5 FKB15_HUMAN |
| 3482 | VKEPPSPQSPR20002000                          | sp Q00613 HSF1_HUMAN  |
| 3483 | SASEPSLHR20000000                            | sp P04049 RAF1_HUMAN  |
|      |                                              | sp P10398 ARAF_HUMAN  |
| 3484 | TIASDSEEEAGKELSDKK202000000000000            | sp Q96ST2 IWS1_HUMAN  |
| 3485 | AAEETPGKSPEK20000                            | sp Q76021 RL1D1_HUMAN |
| 3486 | KGSDDAPYSPTAR200000002000                    | sp Q75151 PHF2_HUMAN  |
| 3487 | QFTSSSIK2000                                 | sp Q04695 K1C17_HUMAN |
| 3488 | HNSPSGHLTHSR20000000200                      | sp Q8IWB9 TEX2_HUMAN  |
| 3489 | SSSEAKPTSLGLAGGHK200000000000000             | sp Q96RK0 CIC_HUMAN   |
| 3490 | HFFHHADEDEEEDDPPER200000                     | sp Q43314 VIP2_HUMAN  |
| 3491 | KTSLSDLNDPIILSSDDDDNDR2.00000000022E+21      | sp Q9GZR1 SENP6_HUMAN |
| 3492 | TPTSSPASSPLVAK200002000000                   | sp Q14684 RRP1B_HUMAN |
| 3493 | IACEEFSSEEGEGGRK2020000000000                | sp Q13547 HDAC1_HUMAN |
| 3494 | AFKPEETSSNSDPPSPVLNNSHPVPR2000000000000      | sp Q60293 ZC3H1_HUMAN |
| 3495 | SSSFSELCHR200000000                          | sp Q5T8I3 F102B_HUMAN |
| 3496 | SASSGAEGDVSSEREP20000000200000               | sp Q8TEA8 DTD1_HUMAN  |
| 3497 | NSSSPVPASVPGQR2002000000000                  | sp Q9H1B7 I2BPL_HUMAN |
| 3498 | SKTPPPPPQTAQTK2000000000000                  | sp P25054 APC_HUMAN   |
| 3499 | NSPNNISGISNPPGTPR20000000000002000           | sp Q9BWW4 SSBP3_HUMAN |
| 3500 | LSMEDSKSPPK200000                            | sp Q9NQG5 RPR1B_HUMAN |
| 3501 | EVSSRPSTPGLSVVSGISATSEIPNKIEDLR2.2E+30       | sp Q14C86 GAPD1_HUMAN |
| 3502 | TDHGAEIVYKSPVSGDTSR20022000                  | sp TAU_HUMAN          |
|      |                                              | sp P10636 TAU_HUMAN   |
| 3503 | TGSESSQTGTSTTSSR202000000000000              | sp P23588 IF4B_HUMAN  |
| 3504 | GVNTFSPEGR200000                             | sp P28066 PSA5_HUMAN  |
| 3505 | NQSPVLEPVGR2000000000                        | sp P51812 KS6A3_HUMAN |
| 3506 | SPSPTTPGSR2020000000000                      | sp P49450 CENPA_HUMAN |
| 3507 | SLSPGKENSALDMEK2000000000001000              | sp Q9H307 PININ_HUMAN |
| 3508 | TDDEDFVPSDASPPK2000000020020000              | sp P11388 TOP2A_HUMAN |
| 3509 | SGYSSPGSPGTPGSR200000000                     | sp TAU_HUMAN          |
|      |                                              | sp P10636 TAU_HUMAN   |
| 3510 | GNSRPGTPSAEGGSTSTLR200000000000000           | sp P35269 T2FA_HUMAN  |
| 3511 | GTPSQSPVGR2000000                            | sp P52594 AGFG1_HUMAN |
| 3512 | LLEDGEDFNLGDALDSSNSMQTIQK2001000000          | sp P05783 K1C18_HUMAN |
| 3513 | RESPSPAPKPR2000000000                        | sp Q8IYB3 SRRM1_HUMAN |
| 3514 | TDHGAEIVYKSPVSGDTSR200020000000              | sp P10636 TAU_HUMAN   |
|      |                                              | sp TAU_HUMAN          |
| 3515 | HIVSNDSSDDESHEPK2200000000000                | sp P47712 PA24A_HUMAN |
| 3516 | IQQGEEEEKESSGEIEAAPVTGTGR220000000000000     | sp Q6AI08 HEAT6_HUMAN |
| 3517 | QEAGDSPPPAPGTPK20000002000                   | sp P49848 TAF6_HUMAN  |
| 3518 | SHVEDGDIAGAPASSPEAPAEQDPVQLK2200000000000000 | sp Q9P2E9 RRBP1_HUMAN |
| 3519 | SPQLSDFGLER200000000000                      | sp Q8IX90 SKA3_HUMAN  |
| 3520 | RNSSEASSGDFLDLK2000000000                    | sp Q9UK76 HN1_HUMAN   |
| 3521 | EPESPASAPIPLFGADTIGQR2E+19                   | sp Q96AY4 TTC28_HUMAN |
| 3522 | SPSLDNPTFPNLGSENPLK2E+19                     | sp Q14653 IRF3_HUMAN  |
| 3523 | VTNDISPESPGVGR22000000                       | sp Q15154 PCM1_HUMAN  |

|      |                                                      |                       |
|------|------------------------------------------------------|-----------------------|
| 3524 | TDHGAEIVYKSPVVSGDTSR200020002000                     | sp P10636 TAU_HUMAN   |
|      |                                                      | sp TAU_HUMAN          |
| 3525 | SLSGSSPCPK20000200000                                | sp Q9UQ35 SRRM2_HUMAN |
| 3526 | FASDDEHDEHDENGATGPVKR2E+19                           | sp P05455 LA_HUMAN    |
| 3527 | AAGDSGEDSDSDYENLIDPTEPSNSEYSHSK2.000200003E+28       | sp Q15018 F175B_HUMAN |
| 3528 | SASSESEAEENLEAQPQSTVRPEEIPPIPENR2.202E+29            | sp Q13427 PPIG_HUMAN  |
| 3529 | GLVAAYSGESDSEEEQER2000000000                         | sp P98175 RBM10_HUMAN |
| 3530 | SLSPGKENVSALDMEK20000000001000                       | sp Q9H307 PININ_HUMAN |
| 3531 | NQVEEDAEDSGEADDEEKPEIHKPGQNSFSK2E+22                 | sp 075717 WDHD1_HUMAN |
| 3532 | RLSTSPDVIQGHQPR20000000000000                        | sp Q9Y385 UB2J1_HUMAN |
| 3533 | GSGSQSSVPSVDQFTGVGIR2000000000000000                 | sp Q9UQE7 SMC3_HUMAN  |
| 3534 | SPGSTPTTPTSSQAPQK200000000000000000                  | sp P35658 NU214_HUMAN |
| 3535 | KSPSGPVKSPPLSPVGTTPVK20000200000000000000            | sp Q9BVC5 ASHWN_HUMAN |
| 3536 | SRTASGSSVTSLDGTR202020000000000000                   | sp Q92597 NDRG1_HUMAN |
| 3537 | NSCQDSEADEETSPGFDEQEDGSSSQTANKPSR2.000002E+28        | sp Q86W56 PARG_HUMAN  |
| 3538 | EDLSPAFDHSPNK20000                                   | sp P17706 PTN2_HUMAN  |
| 3539 | SQSSHSHYDDSTLPLIDR20000200000000000000               | sp 060716 CTND1_HUMAN |
| 3540 | RRSEVESTTESQDK2000000000000000                       | sp Q5UIP0 RIF1_HUMAN  |
| 3541 | VLSEPIGPESPSSTECPR2000000000                         | sp Q56N19 ESCO2_HUMAN |
| 3542 | SDSASSEPVGIYQGFQK200000000000000000                  | sp Q05655 KPCD_HUMAN  |
| 3543 | LQDISSELLATGAGLSESEAEAPDGDHNITELPQAVAGR2.0000002E+28 | sp Q9NQ55 SSF1_HUMAN  |
| 3544 | SASSESEAEENLEAQPQSTVRPEEIPPIPENR2.02202E+31          | sp Q13427 PPIG_HUMAN  |
| 3545 | THTTALAGRSPSPASGR202000000                           | sp Q9UQ35 SRRM2_HUMAN |
| 3546 | SSLGQSASETEEDTVSVSK2.20002E+19                       | sp Q13435 SF3B2_HUMAN |
| 3547 | ERSPSPTTIQSK20200000000                              | sp Q14687 GSE1_HUMAN  |
| 3548 | EQLSETEGSGEDEPGNDPSETTQK2.00002E+21                  | sp Q13107 UBP4_HUMAN  |
| 3549 | SLSPVAAPPLR202000000000                              | sp Q8NDT2 RB15B_HUMAN |
| 3550 | NSSLGSPSNLCGSPPGSIR20000000000200000000              | sp Q9C0B0 UNK_HUMAN   |
| 3551 | NVPQEESELESDVDADFK200000000                          | sp 000505 IMA4_HUMAN  |
| 3552 | RNSSSPVSPASVPGQR2020020000000000                     | sp Q9H1B7 I2BPL_HUMAN |
| 3553 | GRSPQPPAEEDDDFDDLVAIDTYNCDLHFK200000000000000000     | sp Q9BUJ2 HNRL1_HUMAN |
| 3554 | TTYDSAEENKENLYAGK2000000000000000                    | sp Q9HAW4 CLSPN_HUMAN |
| 3555 | GLPSPYNMSSAPGSR102000200                             | sp P15924 DESP_HUMAN  |
| 3556 | QSETVDQNSDSDEMLAILK200000000000                      | sp P46100 ATRX_HUMAN  |
| 3557 | RDSSSQLASTESDKPTTGR200000000000000000                | sp Q96B23 CRO25_HUMAN |
| 3558 | SFTLDDESLK200000000000                               | sp Q86WR7 PRSR2_HUMAN |
| 3559 | SLSPQEDALTGSR200000000000                            | sp Q96EN8 MOCOS_HUMAN |
| 3560 | LKSVEDEMDSPGEEPFTYTGQR2E+20                          | sp Q12857 NFIA_HUMAN  |
| 3561 | SESDLSQPESDEEGYALSGR20000002000000000000             | sp Q15751 HERC1_HUMAN |
| 3562 | STLESEKPGSPEAAETSPPSNIIDHCEK2.000002E+19             | sp Q96T23 RSF1_HUMAN  |
| 3563 | EVDPSTGELQSLQMPESGSSLDPSQEGPTGLK2000000000000000     | sp Q13501 SQSTM_HUMAN |
| 3564 | DKSDSPAQLR20000000                                   | sp Q96ST3 SIN3A_HUMAN |
| 3565 | ALPSLNTGSSSPR2000                                    | sp 014545 TRAD1_HUMAN |
| 3566 | ESSAAQAGSHATHPGTSVLEGGAGSMSPSR20000                  | sp Q5SYE7 NHSL1_HUMAN |
| 3567 | ASLGSLEGEAEAEASSPK2000000000000000                   | sp Q09666 AHNK_HUMAN  |
| 3568 | VFIDQNLSPGK20000                                     | sp Q14186 TFDP1_HUMAN |
| 3569 | SGSSPDSEITELKFPSINHD2.0222E+21                       | sp P17812 PYRG1_HUMAN |
| 3570 | VISDESSEDIGSDVEFKPDTK20200000000000000000            | sp P52701 MSH6_HUMAN  |
| 3571 | VADPDHDHTGFLTEYVATR300000                            | sp P28482 MKO1_HUMAN  |
| 3572 | SPGAPGPLTLK20000000000000                            | sp Q15942 ZYG_HUMAN   |
| 3573 | SDSLLSFR2002000                                      | sp Q00587 BORG5_HUMAN |
| 3574 | LESSEGEIIQTVDR22000000000000                         | sp Q99590 SCAFB_HUMAN |
| 3575 | TASESISNLSEAGSIK20000000020002000                    | sp P30622 CLIP1_HUMAN |
| 3576 | HDTVTVSSDLQFTK2000000000                             | sp P30414 NKTR_HUMAN  |

|      |                                                       |                       |
|------|-------------------------------------------------------|-----------------------|
| 3577 | TTCMSSQGSDDDEQIKR200000000                            | sp Q9P0V9 SEP10_HUMAN |
| 3578 | SDHGAYSQSPAIK20000000000000                           | sp Q9Y4B6 VPRBP_HUMAN |
| 3579 | RGSPSAAFTFPDPTDDDFGK2000000000000000                  | sp Q9ULT0 TTC7A_HUMAN |
| 3580 | SDGAPASDSKPGSSEAAPSSK20002000000000                   | sp P80723 BASP1_HUMAN |
| 3581 | EEDCHSPTS KPPKPDQLK2000000000000000                   | sp P23588 IF4B_HUMAN  |
| 3582 | GHTDTEGRPPSPPTSTPEK20000020000                        | sp Q00613 HSF1_HUMAN  |
| 3583 | EGEPTVYSDEEEK20000000                                 | sp 000264 PGRC1_HUMAN |
| 3584 | KVEEDLKADEPSSEESDLEIDK200020000000                    | sp P50502 F10A1_HUMAN |
| 3585 | NYQQNYQNSESGEKNESESAPEGQAQR2.000000002E+21            | sp P67809 YBOX1_HUMAN |
| 3586 | SKPPPTYESEEEK2000000                                  | sp 060885 BRD4_HUMAN  |
| 3587 | HSHSHSPMSTR20002000000                                | sp P62995 TRA2B_HUMAN |
| 3588 | AQSYPDNHQEFSDYDNPIFEK2E+19                            | sp Q9Y2U5 M3K2_HUMAN  |
| 3589 | RGSDASDFDISEIQSVCSDVETVPQTHRPTPR2E+30                 | sp Q03001 DYST_HUMAN  |
| 3590 | DSSKGEDSAEETEAKPAVVAPVPVEAVSTPSAAFPSDATAEQGPILTK2E+38 | sp Q12906 ILF3_HUMAN  |
| 3591 | RLPQDHADSCVVSSDDEELSR2200000000                       | sp P78317 RNF4_HUMAN  |
| 3592 | STAPSAASASASAAASSPAGGGAEELEHCGVCR2E+36                | sp Q13263 TIF1B_HUMAN |
| 3593 | SQTPSPSTLNIDHMEQK202020000000000000                   | sp Q6GYQ0 RGPA1_HUMAN |
| 3594 | AALAPAKESPR2000                                       | sp Q13428 TCOF_HUMAN  |
| 3595 | ELDPSLVSANDSPSGMQTR200000000                          | sp Q5UIP0 RIF1_HUMAN  |
| 3596 | TPLTSADEHVHVK20002000000000                           | sp Q5SW79 CE170_HUMAN |
| 3597 | LSPDFAEELR2000000000                                  | sp Q14160 SCRIB_HUMAN |
| 3598 | VASETHSEGSEYEELPK20200000000000                       | sp Q5JSZ5 PRC2B_HUMAN |
| 3599 | KPPAPSPVQSQSPSTNWSPAVPVKK2020000000000000             | sp Q8IYB3 SRRM1_HUMAN |
| 3600 | AGMSSNQSISSPVLDAVPR20000022000000000                  | sp Q9UQ35 SRRM2_HUMAN |
| 3601 | ESSEPPAPASSPEAASPTTEQGPAGTSK220000000000000000        | sp Q92766 RREB1_HUMAN |
| 3602 | LSSQISAGEEK2000000                                    | sp Q86UE4 LYRIC_HUMAN |
| 3603 | APSVATVGSICDLNLK2000000000000000                      | sp 075369 FLNB_HUMAN  |
| 3604 | ILSDVTHSAVFGVPASK2000000000000000                     | sp Q2M2I8 AAK1_HUMAN  |
| 3605 | DDSHAEDSEDEKEDHK2000000000                            | sp Q9H1E3 NUCKS_HUMAN |
| 3606 | AADPPAENSSAPEAEQGGAE200000000000                      | sp P67809 YBOX1_HUMAN |
| 3607 | TAGSSVTSLDGTR20000000000                              | sp Q92597 NDRG1_HUMAN |
| 3608 | AVLSDSPQLSEK2000000000                                | sp Q7Z4H7 HAUS6_HUMAN |
| 3609 | KPSLVDLPWEGAAPQSPSFGSEDSGSPK2020000000000000          | sp Q13425 SNTB2_HUMAN |
| 3610 | KPPAPSPVQSQSPSTNWSPAVPVK2020200000000000              | sp Q8IYB3 SRRM1_HUMAN |
| 3611 | SLTNSHLEK2000000000                                   | sp Q9H2H9 S38A1_HUMAN |
| 3612 | QTPSPDVVLR20000000                                    | sp Q9UPQ0 LIMC1_HUMAN |
| 3613 | DQSPPPSPPSYHPPPPPTK20002000000000000000               | sp Q9P206 K1522_HUMAN |
| 3614 | DMAECSTPLPEDCSPHSPR20000000                           | sp Q12802 AKP13_HUMAN |
| 3615 | TPVQYSQQQNSPK20000                                    | sp P46013 KI67_HUMAN  |
| 3616 | ASPGTPLSPGSLR2002000                                  | sp Q96BD0 SO4A1_HUMAN |
| 3617 | EHYVSSPSSPPAQP GGVS R202200000000000000               | sp 075179 ANR17_HUMAN |
| 3618 | SLGYHGSSYSPGVEPVSPVSSPLTHDK2002000000000              | sp Q9Y618 NCOR2_HUMAN |
| 3619 | EVDATSPAPSTSSTVK20000000000000                        | sp Q16666 IF16_HUMAN  |
| 3620 | DGDSYDPYDFSDTEEMPQVHTPK2020000000000000               | sp P25205 MCM3_HUMAN  |
| 3621 | EPGSPSVQR20000000                                     | sp Q9H6F5 CCD86_HUMAN |
| 3622 | SLGSASPGGQPPLSSPTR20000000000200000                   | sp Q9C0B5 ZDHC5_HUMAN |
| 3623 | SGSSSPDSEITELKFPSINH2.0222002E+21                     | sp P17812 PYRG1_HUMAN |
| 3624 | VIGQDHDFSESSEEAPEASSGALR220000000000000000            | sp P23497 SP100_HUMAN |
| 3625 | MESEGGADDAEGLDLDLDDNEDRGDDQLELIKDDEK2E+29             | sp P07910 HNRPC_HUMAN |
| 3626 | EEGRCSSDDDTDVDMEGLR22200020000000000                  | sp Q96AQ6 PBIP1_HUMAN |
| 3627 | GNIETSEDEDDTADLFPEESGFEHAWR2.22E+24                   | sp Q9H501 ESF1_HUMAN  |
| 3628 | RFSDSEGEETVPEPR2000000000000000                       | sp Q13286 CLN3_HUMAN  |
| 3629 | RKPSVPDASPADDSFVDPGER2E+19                            | sp P16333 NCK1_HUMAN  |

|      |                                              |                       |
|------|----------------------------------------------|-----------------------|
| 3630 | MLPHAPGVQMQAIPEDAIPEESGDEDEDDPKR200000000000 | sp Q13547 HDAC1_HUMAN |
| 3631 | DGTAPPPQSPGSPGTGQDEEWSDEESPR2E+26            | sp Q9UKS6 PACN3_HUMAN |
| 3632 | SSLSSHSHSQSIYR220000000000                   | sp O15027 SC16A_HUMAN |
| 3633 | ELSDQATASPIVAR2000000                        | sp Q5JSH3 WDR44_HUMAN |
| 3634 | HIKEEPLSEEEPTSTAIASPEKK200000000000200000    | sp Q9Y2X3 NOP58_HUMAN |
| 3635 | RGSDIDNPTLTVMDISPPSR2000000000000000000      | sp Q9Y2U5 M3K2_HUMAN  |
| 3636 | ATEDGEEDEVSAGEK200000                        | sp Q9BXW9 FACD2_HUMAN |
| 3637 | SQSLFLPTEAAQVSPPPYPAPQELTQPLLQQPR2E+21       | sp Q6UUV7 CRTC3_HUMAN |
| 3638 | SLYESFVSSDR2000000000000                     | sp P18615 NELFE_HUMAN |
| 3639 | GAGGSPVGVVEGLVNVGTGQK2000000000000000000     | sp Q7Z5J4 RAI1_HUMAN  |
| 3640 | VETLSPESALQGSFR200000002000                  | sp Q99958 FOXC2_HUMAN |
| 3641 | LAGGQTSQPTTPLTSPQR200000                     | sp O95155 UBE4B_HUMAN |
| 3642 | ATSSSNPSSPAPDWYK2000002000000000             | sp P46100 ATRX_HUMAN  |
| 3643 | AQTPPISSLPTSPSDEVGR220020000000000           | sp Q15751 HERC1_HUMAN |
| 3644 | EGETQGVAFEHESPADFQNSQSPVQDQDK200000000       | sp P78332 RBM6_HUMAN  |
| 3645 | ALSLGTIPSLTR200000000000                     | sp Q5SNT2 TM201_HUMAN |
| 3646 | LENSPLGEALR200000000                         | sp Q9NX40 OCAD1_HUMAN |
| 3647 | GDAASSPAPAASVGSQGGAR20000000020000000        | sp Q8WVB6 CTF18_HUMAN |
| 3648 | EESDEEEEDDEESGR200000000000000               | sp Q96EV2 RBM33_HUMAN |
| 3649 | GPVSGSPDSMNASR2000000000                     | sp O14920 IKKB_HUMAN  |
| 3650 | KEVLASPR20000                                | sp Q9C0C2 TB182_HUMAN |
| 3651 | GAGATSGSPAGR2000000                          | sp P16455 MGMT_HUMAN  |
|      |                                              | sp Q9TNN7 1C05_HUMAN  |
|      |                                              | sp P04222 1C03_HUMAN  |
|      |                                              | sp Q07000 1C15_HUMAN  |
|      |                                              | sp Q29865 1C18_HUMAN  |
|      |                                              | sp Q29960 1C16_HUMAN  |
| 3652 | GGSCSQAASSNSAQGSDESLIACK2002000000           | sp Q29963 1C06_HUMAN  |
|      |                                              | sp P30504 1C04_HUMAN  |
|      |                                              | sp P30505 1C08_HUMAN  |
|      |                                              | sp P30508 1C12_HUMAN  |
|      |                                              | sp P30510 1C14_HUMAN  |
|      |                                              | sp Q95604 1C17_HUMAN  |
| 3653 | VEHSPGPPVVDK2000000000                       | sp Q9H869 YYAP1_HUMAN |
| 3654 | SFQGDDSDLLK2000000000000                     | sp Q9UPQ0 LIMC1_HUMAN |
| 3655 | RSSQPSPTAVPASDSPPTK2000000000000000000       | sp Q3KQU3 MA7D1_HUMAN |
| 3656 | QPPGVPNGPSSPTNESAPELPQR200000000000000       | sp Q8TF74 WIPF2_HUMAN |
| 3657 | DSSTSYTETKDPSSGQEVATPPVQLQVCEPK2. 2E+30      | sp Q9UKV3 ACINU_HUMAN |
| 3658 | KLEDVKNSPTFK200000                           | sp P55327 TPD52_HUMAN |
| 3659 | RKPSVPDSASPADDSFVDPGER200000000000000        | sp P16333 NCK1_HUMAN  |
| 3660 | APSPPTASNSNSQSEK2000000000000000000          | sp Q8N108 MIER1_HUMAN |
| 3661 | WESQQDVSQTTVSR2000000000000                  | sp Q9NQT8 KI13B_HUMAN |
| 3662 | GRLTPSPDIVLSDNEASSPR2020000000000000000      | sp Q8WXI9 P66B_HUMAN  |
| 3663 | SPSPASTSTVPNMTDAPTAPK2. 02E+21               | sp Q659A1 ICE2_HUMAN  |
| 3664 | ASPPPAHAHEHGGVLAR2020000000000000000         | sp O75385 ULK1_HUMAN  |
| 3665 | SLPTPAVLLSPTK20000                           | sp Q8WX93 PALLD_HUMAN |
| 3666 | GGGSCSGSAGGGGSLPSQR200000000                 | sp O15234 CASC3_HUMAN |
| 3667 | SPHQLLSPSSFSPSATPSQK2. 000002E+20            | sp Q14181 DPOA2_HUMAN |
| 3668 | LDGLVETPTGYIESLPR200000000000                | sp P55209 NP1L1_HUMAN |
| 3669 | SPSLSLAPLSPR20000002000                      | sp Q969H4 CNKR1_HUMAN |
| 3670 | VQSGMGLILQGYESGSEEEGEIHEK1. 0000000202E+21   | sp Q13523 PRP4B_HUMAN |
| 3671 | SLPTTVPESPNYR200000000000000                 | sp Q6PKG0 LARP1_HUMAN |
| 3672 | GYSPYSVSGSGSTAGSR20020000000000000           | sp Q15149 PLEC_HUMAN  |
| 3673 | SPSLLQSGAK20000000000                        | sp Q9BQG0 MBB1A_HUMAN |

|      |                                                |                       |
|------|------------------------------------------------|-----------------------|
| 3674 | SKGSDKDFVIVR2002000000000                      | sp Q13309 SKP2_HUMAN  |
| 3675 | SQSSDTEQQSPTSGGGK2000000000000                 | sp P23588 IF4B_HUMAN  |
|      |                                                | sp P67809 YBOX1_HUMAN |
| 3676 | SVGDGETVEFDVVEGEK20000000000000000             | sp P16989 YBOX3_HUMAN |
|      |                                                | sp Q9Y2T7 YBOX2_HUMAN |
| 3677 | SGSSPDSEITELKFPSINH2. 02E+21                   | sp P17812 PYRG1_HUMAN |
| 3678 | NHSPSPVPTGAAPSLASPK2. 02E+19                   | sp Q5SYE7 NHSL1_HUMAN |
| 3679 | SPAGPAATPAQAQAASPR2000                         | sp Q13428 TCOF_HUMAN  |
| 3680 | SNSVGIQDAFNDGSDSTFQK20000000000000000          | sp O14497 ARI1A_HUMAN |
| 3681 | HGAPAAPSPPPR200000                             | sp Q4KMP7 TB10B_HUMAN |
|      |                                                | sp P42166 LAP2A_HUMAN |
| 3682 | SSTPLPTISSAENTR20000000000000000               | sp P42167 LAP2B_HUMAN |
|      |                                                | sp Q13247 SRSF6_HUMAN |
| 3683 | ARVSPPPKR202000000                             | sp Q9Y613 FHOD1_HUMAN |
| 3684 | SLEGGGCPAR200000000000                         | sp Q13425 SNTB2_HUMAN |
| 3685 | KPSLVSDLPWEGAAPQSPSFGSEDSGSPK20000000000000000 | sp Q02952 AKA12_HUMAN |
| 3686 | SAESPTSPVTSETGSTFK20000000000000000            | sp Q15276 RABE1_HUMAN |
| 3687 | AQSTDSLGTSGSLQSK20200000000000000              | sp Q9Y2X7 GIT1_HUMAN  |
| 3688 | HGSGADSDYENTQSGDPLLGLEGK2. 000000002E+22       | sp Q71F23 CENPU_HUMAN |
| 3689 | LRPISDDSEIEESDTR200202000000000                | sp P29401 TKT_HUMAN   |
| 3690 | ILATPPQEDAPSVDIANIR20000000000000000           | sp Q9C0B5 ZDHC5_HUMAN |
| 3691 | SLGSASPGPGQPPLSSPTR200000000200000             | sp Q6PJF5 RHDF2_HUMAN |
| 3692 | QASLSQSIR200000000                             | sp Q9BVS4 RIOK2_HUMAN |
| 3693 | SFEMTEFNQALEEIK20010000000000000               | sp Q9NQC1 JADE2_HUMAN |
| 3694 | KYISSDNSDTTDSHATSTSASR2. 022E+21               | sp Q7Z6B7 SRGP1_HUMAN |
| 3695 | STSSSDTMSTFKPMVAPR22000000000000000            | sp P23588 IF4B_HUMAN  |
| 3696 | SLENETLNK20000000000                           | sp P30510 1C14_HUMAN  |
|      |                                                | sp Q9TNN7 1C05_HUMAN  |
|      |                                                | sp P04222 1C03_HUMAN  |
|      |                                                | sp Q07000 1C15_HUMAN  |
|      |                                                | sp Q29865 1C18_HUMAN  |
| 3697 | GGSCSQAASSNSAQGSDESLIACK2002000000             | sp Q29960 1C16_HUMAN  |
|      |                                                | sp Q29963 1C06_HUMAN  |
|      |                                                | sp P30504 1C04_HUMAN  |
|      |                                                | sp P30505 1C08_HUMAN  |
|      |                                                | sp P30508 1C12_HUMAN  |
|      |                                                | sp Q95604 1C17_HUMAN  |
| 3698 | LQSIGTENTEENR2000000000000                     | sp ALDOA_RABIT        |
|      |                                                | sp P04075 ALDOA_HUMAN |
| 3699 | SKSPLPPEEEAK200000000000                       | sp Q1KMD3 HNRL2_HUMAN |
| 3700 | SSPPLRTPDVLESSGPAVR200002000000000000000       | sp O75676 KS6A4_HUMAN |
|      |                                                | sp P55795 HNRH2_HUMAN |
| 3701 | HTGPNSPDTANDGFVR2000000000000                  | sp P31943 HNRH1_HUMAN |
|      |                                                | sp Q9Y2F5 ICE1_HUMAN  |
| 3702 | VPGEDGTLPPTQGSPLR20000                         | sp P36915 GNL1_HUMAN  |
| 3703 | EEQTDTSDGESVTHHIR20000000000000000             | sp Q92922 SMRC1_HUMAN |
| 3704 | KHSPSPPTPTESR202000020000000                   | sp Q9HB20 PKHA3_HUMAN |
| 3705 | TYSDTDSCSDIPLDPDRPVHCSK2. 0002E+22             | sp Q8IY81 SPB1_HUMAN  |
| 3706 | TEIMSPLYQDEAPK2000000000000                    | sp Q7Z589 EMSY_HUMAN  |
| 3707 | TNSSSSSPVVLK20200000000000000                  | sp P28290 SSFA2_HUMAN |
| 3708 | TGSVQTPPDLESSEEVDAEAGAPEVVGPK2. 0020000002E+27 | sp P33527 MRP1_HUMAN  |
| 3709 | QLSSSSYSGDISR2220000000000                     | sp P42167 LAP2B_HUMAN |
|      |                                                | sp P42166 LAP2A_HUMAN |
| 3710 | SSTPLPTISSAENTR200000000000000200              | sp Q8IYB3 SRRM1_HUMAN |
| 3711 | KPPAPSPVQSQSPSTNWSPAVPVK2. 000200020002E+19    |                       |

|      |                                                            |                       |
|------|------------------------------------------------------------|-----------------------|
| 3712 | EAARSPDKPGGSPSASR20000002000000                            | sp Q9Y3T9 NOC2L_HUMAN |
| 3713 | SQLQALHIGLDSSSIGSGPGDAEADDGFPESR2.2E+20                    | sp O75116 ROCK2_HUMAN |
| 3714 | LDSTQLQLHNQVLEQHQQLNPPSSPK2000                             | sp Q86TC9 MYPN_HUMAN  |
| 3715 | GAAAADLLSSSPESQHGGTQSPGGGQPLLQPTK2E+25                     | sp Q9H3S7 PTN23_HUMAN |
| 3716 | SRSRSPTPSSAGLGSNSAPPIDSR2.020202002E+26                    | sp Q8IWX8 CHERP_HUMAN |
| 3717 | CAPSAGSPAAAVGRESGAAATSSSGPQAQQHR2.000000002E+27            | sp Q7L2J0 MEPCE_HUMAN |
| 3718 | WLDESDAEMELR200010000                                      | sp Q9P035 HACD3_HUMAN |
| 3719 | ATSPSSVSGDFDDGHHSVSTPGPSR2.02E+24                          | sp Q86U86 PB1_HUMAN   |
| 3720 | VVSSVSSSPR2000                                             | sp P29375 KDM5A_HUMAN |
| 3721 | TLSDSELCSGR2000000000                                      | sp O60292 SI1L3_HUMAN |
| 3722 | VPQALNFSPEESDSTFSK200000000000                             | sp Q9NYZ3 GTSE1_HUMAN |
| 3723 | SPDKPGGSPSASR20000000000000                                | sp Q9Y3T9 NOC2L_HUMAN |
| 3724 | VSITSEVESTSNPSSSSLQK2000000000                             | sp Q04656 ATP7A_HUMAN |
| 3725 | GNAEGSSDEEGKLVIDEPAKEK220000000000000000                   | sp P51858 HDGF_HUMAN  |
| 3726 | DSDQVAQSDGEESPAAEQLLGEHIK2E+19                             | sp O94979 SC31A_HUMAN |
| 3727 | TENGTCPSPPLSPAAALGSGSAAAVPK2.000000002E+25                 | sp Q12948 FOXC1_HUMAN |
| 3728 | LSPPVASGGIPHQSPPTK200000000000200000                       | sp Q96T58 MINT_HUMAN  |
| 3729 | GVVSEDIPLNLSR200                                           | sp Q12931 TRAP1_HUMAN |
| 3730 | ESAAPASPAPSPAPSPPTAPPQK200020002000000000                  | sp Q3KQU3 MA7D1_HUMAN |
| 3731 | TASRPDDIPSPSSPK2020000                                     | sp Q5VZK9 LR16A_HUMAN |
| 3732 | IYHLPDAESDEDEDFK2000000000                                 | sp Q15019 SEPT2_HUMAN |
|      |                                                            | sp P05534 1A24_HUMAN  |
|      |                                                            | sp Q09160 1A80_HUMAN  |
| 3733 | GGSYSQAASSDSAQGSVDVSLTACK2000000000000000                  | sp P30447 1A23_HUMAN  |
|      |                                                            | sp P01891 1A68_HUMAN  |
|      |                                                            | sp P01892 1A02_HUMAN  |
|      |                                                            | sp P10316 1A69_HUMAN  |
|      |                                                            | sp P42166 LAP2A_HUMAN |
| 3734 | SSTPLPTISSAENTR2000000000000000                            | sp P42167 LAP2B_HUMAN |
|      |                                                            | sp Q5T4S7 UBR4_HUMAN  |
| 3735 | TSPADHGGVSGSESGSAVDSVAGEHSVSGR2.20000002E+31               | sp P25205 MCM3_HUMAN  |
| 3736 | RSEDESETEDEEEKSQEDQEK202000000000000000                    | sp O15027 SC16A_HUMAN |
| 3737 | RSSLSSHSHQSQIYR20200000000000                              | sp Q6ZNJ1 NBEL2_HUMAN |
| 3738 | RISQVSSGETEYNPTEAR200000000000000000                       | sp Q12996 CSTF3_HUMAN |
| 3739 | RPNEDSDEDEEKGA VPPVHDIYR2E+19                              | sp Q15477 SKIV2_HUMAN |
| 3740 | ASSLEDLVLK200000000                                        | sp Q13435 SF3B2_HUMAN |
| 3741 | GFEEHKSDDSSDDEQEK2000220000000                             | sp Q9Y679 AUP1_HUMAN  |
| 3742 | LRPQSAQSSFPSPGSPDVQLATLAQR2000000000000000                 | sp Q7Z417 NUFP2_HUMAN |
| 3743 | NDSWGSFDLR200000000                                        | sp Q13596 SNX1_HUMAN  |
| 3744 | LPPFPGLEPESEGAAGGSEPEAGSDTEGEDIFTGAAVVSK202000000000000000 | sp P47712 PA24A_HUMAN |
|      | 000000                                                     | sp Q5JPI9 MET10_HUMAN |
| 3745 | HIVSNDSSDDESHEPK2202000000000                              | sp Q8IYB3 SRRM1_HUMAN |
| 3746 | SDKSGPGEDGFVPSALGTR2000000000000000                        | sp P19532 TFE3_HUMAN  |
| 3747 | SPSPAPPPR2020000000                                        | sp Q92597 NDRG1_HUMAN |
| 3748 | AASDPLLSSVPAVSK2000000                                     | sp Q3KR37 GRM1B_HUMAN |
| 3749 | TASGSSVTSLDGTR2022020000000                                | sp O43818 U3IP2_HUMAN |
| 3750 | VPHLEEVMSPVTTPTDEDVGH1200020000000000                      | sp Q9UPP1 PHF8_HUMAN  |
| 3751 | MNEISSDSESESLAPR2202000200000                              | sp Q9NYF3 FA53C_HUMAN |
| 3752 | DAEYIYPSLESDDDDPALK2000000000                              | sp Q9C0C2 TB182_HUMAN |
| 3753 | RFLSPLSLGPQASR2020000000000                                | sp O43237 DC1L2_HUMAN |
| 3754 | VSGAGFSPSSK200000                                          | sp Q7L1V2 MON1B_HUMAN |
| 3755 | DFQDYMEPEEGCQSPQR20000                                     | sp P02545 LMNA_HUMAN  |
| 3756 | DKDQPPSPSPPPQSEALSSTR202000000000000000                    | sp Q15149 PLEC_HUMAN  |
| 3757 | LRLSPSPTSQR202000000                                       |                       |
| 3758 | SSSVGSSSYPIPAVSR220022000000000000                         |                       |

|      |                                                     |                       |
|------|-----------------------------------------------------|-----------------------|
| 3759 | SELISEGRPVETDSESEFPVFPTALTSER2020000000000000000    | sp Q5T5U3 RHG21_HUMAN |
| 3760 | LPNLSSPSAEGPPGPPSGPAPR2000000000000000000           | sp O60784 TOM1_HUMAN  |
| 3761 | SPQPVCSPAGSEGTK2000002000000000000                  | sp Q6KC79 NIPBL_HUMAN |
| 3762 | AGSPLCNSNLQDSEEDIEPSYSLFR2.00002E+23                | sp Q9NRY4 RHG35_HUMAN |
| 3763 | RVSLSEIGFGK2000000000                               | sp Q00536 CDK16_HUMAN |
| 3764 | VASETHSEGSEYEELPK202002000000000                    | sp Q5JSZ5 PRC2B_HUMAN |
| 3765 | ISSKSPGHMVILDQTK202000100000000                     | sp Q9NWH9 SLTM_HUMAN  |
| 3766 | KPVTVSPTTPTSPTTEGEAS20                              | sp Q9Y6G9 DC1L1_HUMAN |
| 3767 | VSGAQEMVSSAK2000000000000                           | sp O60664 PLIN3_HUMAN |
| 3768 | EESDDEDEKESSEEPK2200000000000000000                 | sp P35659 DEK_HUMAN   |
| 3769 | KTSDANETEDHLESLICK2000000000000                     | sp Q09161 NCBP1_HUMAN |
| 3770 | STPLASPSPPGR2000200000000                           | sp Q8WYP5 ELYS_HUMAN  |
| 3771 | KIPEPSPVTR200000                                    | sp Q7Z4S6 KI21A_HUMAN |
| 3772 | SPSLLQSGAK20000020000                               | sp Q9BQG0 MBB1A_HUMAN |
| 3773 | STAQQELDGKASPTPVIVASHTANKEEK2000000000000000000     | sp P35606 COPB2_HUMAN |
| 3774 | EDSGTFLGK200000000                                  | sp O75569 PRKRA_HUMAN |
| 3775 | KTSSDDESEEDDLLQR2220000000000000000                 | sp Q9Y5J1 UTP18_HUMAN |
| 3776 | QHEVEIPSPTQK200000                                  | sp Q08499 PDE4D_HUMAN |
| 3777 | HSSISPSTLTK2202000000000                            | sp Q14004 CDK13_HUMAN |
| 3778 | ASPVTSAAAFTASPANK2000000000000200000                | sp Q9UIF9 BAZ2A_HUMAN |
| 3779 | VSGYSTCHSR200                                       | sp Q5T8I3 F102B_HUMAN |
| 3780 | RPPSQLTSSSLSSPDIFDSPSPEEDKEEHISLAHR2000000000200000 | sp Q96B97 SH3K1_HUMAN |
| 3781 | AATTATPAATTSPK2000                                  | sp Q92766 RREB1_HUMAN |
| 3782 | TPGPPPPDDEDDPVPLPVSGDKEEDAPHR2E+31                  | sp Q69YN4 VIR_HUMAN   |
| 3783 | TRSPSPTLGESLAPHK200020000000000                     | sp Q86UU1 PHLB1_HUMAN |
| 3784 | DVDDGSGSPHSPHQLSSK200002000000000                   | sp Q9H4A3 WNK1_HUMAN  |
| 3785 | GEFSASPMLK200000                                    | sp Q9UQ35 SRRM2_HUMAN |
| 3786 | ASTASPCNNNINAATAVALQEPR2E+21                        | sp Q71RC2 LARP4_HUMAN |
| 3787 | VMHSSPSSSDGK20000000                                | sp Q969R2 OSBP2_HUMAN |
| 3788 | GSDALSETSSVSHIEDLEK202200000000000                  | sp Q6P996 PDXD1_HUMAN |
| 3789 | SPTPTVNPR2000000000                                 | sp Q8WY36 BBX_HUMAN   |
| 3790 | TASPPPPPK20000000                                   | sp Q8IYB3 SRRM1_HUMAN |
| 3791 | GGSYSQAASSDSAQGSVDVSLTACK20002000000000             | sp P01891 1A68_HUMAN  |
|      |                                                     | sp P10316 1A69_HUMAN  |
|      |                                                     | sp P01892 1A02_HUMAN  |
|      |                                                     | sp P05534 1A24_HUMAN  |
|      |                                                     | sp P30447 1A23_HUMAN  |
|      |                                                     | sp Q09160 1A80_HUMAN  |
| 3792 | EFGYDSPHDLSD200                                     | sp Q96CW6 S7A60_HUMAN |
| 3793 | DPVYDESTDEESENQTDLSGLASAAVSK2.0002E+21              | sp Q13426 XRCC4_HUMAN |
| 3794 | ISFVEEDVHPK20000000000                              | sp Q8WYP5 ELYS_HUMAN  |
| 3795 | YSPTSPTYSPK300000002000000                          | sp P24928 RPB1_HUMAN  |
| 3796 | AAFDDAIAELDTLSEESYK2000                             | sp P62258 1433E_HUMAN |
| 3797 | DDEKEAEEGEDDRDSANGEDDS20                            | sp P07910 HNRPC_HUMAN |
| 3798 | SNMSPHGLPAR200000000                                | sp Q13330 MTA1_HUMAN  |
|      |                                                     | sp P01891 1A68_HUMAN  |
|      |                                                     | sp P01892 1A02_HUMAN  |
|      |                                                     | sp P05534 1A24_HUMAN  |
| 3799 | GGSYSQAASSDSAQGSVDVSLTACK20002000000000             | sp Q09160 1A80_HUMAN  |
|      |                                                     | sp P10316 1A69_HUMAN  |
|      |                                                     | sp P30447 1A23_HUMAN  |
| 3800 | SSPSARPPDVPQQPQAAK2.2E+19                           | sp Q96JP5 ZFP91_HUMAN |
| 3801 | VSPASPAGSPSADFAVHGESLGDR2.0020002E+23               | sp Q96C92 SDCG3_HUMAN |



|      |                                                    |                       |
|------|----------------------------------------------------|-----------------------|
| 3802 | NTSSDNSDVEVMPAQSPR2002000000000000                 | sp Q9HCK8 CHD8_HUMAN  |
| 3803 | TETPPPLASLNVSK2000000000000000                     | sp Q3MHD2 LSM12_HUMAN |
| 3804 | TVDSQGPTPVCTPTFLER200020000000                     | sp Q9BYG3 MK67I_HUMAN |
| 3805 | KGNSPNEPPTPK20000000000                            | sp P48634 PRC2A_HUMAN |
| 3806 | DHNSDEDEDKYADDIDMPGQNFDSK2E+23                     | sp 095391 SLU7_HUMAN  |
| 3807 | VKPETPPR20000                                      | sp Q9UQ35 SRRM2_HUMAN |
| 3808 | QDDSPSGASYGQDYDLSPSR2000000000020000               | sp Q9NYV4 CDK12_HUMAN |
| 3809 | QQPQPSQTESPQEAQIIQAK2000000000000000               | sp 096020 CCNE2_HUMAN |
| 3810 | QLPALDGLMGPESPPAQEEEEAPVSPHK2. 01E+21              | sp Q8N9T8 KRI1_HUMAN  |
| 3811 | LFDSSDDDESSEDSDSNRFK220000202000000000             | sp Q76FK4 NOL8_HUMAN  |
| 3812 | AAEDDSASPPGAASDAEPGDEERPGLQVDCVCGDK2. 00000002E+31 | sp P10588 NR2F6_HUMAN |
| 3813 | MDSNFGLAGLPGSPK2000                                | sp 043463 SUV91_HUMAN |
| 3814 | SATDGNTSTPPTSAK20000000                            | sp Q13620 CUL4B_HUMAN |
| 3815 | SASSSEEEELYLGPSPTR2. 0222E+19                      | sp Q6QNY0 BL1S3_HUMAN |
| 3816 | RPESPSEISPIK2000000000                             | sp Q7Z5K2 WAPL_HUMAN  |
| 3817 | WLDDLLASPPPSGGGAR20000000000                       | sp Q9C0C2 TB182_HUMAN |
| 3818 | NNSFTAPSTVGK20000000000                            | sp 095453 PARN_HUMAN  |
| 3819 | TVTCTVVEPEAPSPDVLQAATHR200000000000                | sp Q9P1Y6 PHRF1_HUMAN |
| 3820 | SFSKEVEER20000000                                  | sp Q04637 IF4G1_HUMAN |
| 3821 | SPLQSVVVR2000000000                                | sp Q9Y2W1 TR150_HUMAN |
| 3822 | SPPPGPDGHAK200000000000                            | sp P57081 WDR4_HUMAN  |
| 3823 | TSAVSSPLLDQQR20002000000000                        | sp Q5T200 ZC3HD_HUMAN |
| 3824 | EKGPTTGEGALDLSDVHSPPKSPEGK2000200000               | sp 095684 FR10P_HUMAN |
| 3825 | ASPITNDGEDEFVPSDGLDKDEYTFSPGK2. 0000000000002E+28  | sp Q02880 TOP2B_HUMAN |
| 3826 | ESLGSEESGKDWDELEEEAR2. 0020002E+20                 | sp Q9Y5B9 SP16H_HUMAN |
| 3827 | FGSEEVEMEVESEDEDDKQEK1000200000000000              | sp Q15459 SF3A1_HUMAN |
| 3828 | MPLDLSPLATPIIR2000000000                           | sp P15336 ATF2_HUMAN  |
| 3829 | ENSPAVSPTTNSTAPFGLKPR2002000000000000              | sp Q9Y2L9 LRCH1_HUMAN |
| 3830 | GPPSPAPVMHSPSR2000000020000                        | sp Q13573 SNW1_HUMAN  |
| 3831 | MESEGGADDSAEGLDLDLDDDDNEDRGDDQLELIKDDEK2E+36       | sp P07910 HNRPC_HUMAN |
| 3832 | HASSSPSPKAPAPGSHR2002000000000000                  | sp Q9UQ35 SRRM2_HUMAN |
| 3833 | NGSLDSPGKQDTEEDEEEDEKDK2. 000000002E+21            | sp Q9Y266 NUDC_HUMAN  |
| 3834 | KDEETEESYDSEHENSEPVTNIR2. 002000200002E+20         | sp Q15154 PCM1_HUMAN  |
| 3835 | GYGFVDFDSPAQAQK20000000                            | sp Q15434 RBMS2_HUMAN |
| 3836 | GPTSTSIDNIDGTPVRDER20000000                        | sp Q5VT52 RPRD2_HUMAN |
| 3837 | TVSTSSQPEENVDR2002000000000                        | sp P42684 ABL2_HUMAN  |
| 3838 | NLDPDPEPPSPDSPTETFAAPAEVR2002000000000000          | sp Q9BUA3 CK084_HUMAN |
| 3839 | SQLPTLEQDGGTQNPVSSPGMSQELR2000000000               | sp P46937 YAP1_HUMAN  |
| 3840 | SHHAPSPGSSGGGQPLAR1200000000000000                 | sp 014497 ARI1A_HUMAN |
| 3841 | NYQQNYQNSSEGEKNEGSESAPEGQAQR2. 0000002E+19         | sp P67809 YBOX1_HUMAN |
| 3842 | LPNSIASR200000                                     | sp Q9ULT0 TTC7A_HUMAN |
| 3843 | NSPEDLGLSLTGDSCK2000000200000000                   | sp Q12888 TP53B_HUMAN |
| 3844 | VVSDADSDSDAVSDK200002020002000                     | sp Q96ST2 IWS1_HUMAN  |
| 3845 | STFSTNYR20000000                                   | sp P05783 K1C18_HUMAN |
| 3846 | SGSSQELDVKPSASPQER22000000000200000                | sp Q9UQ35 SRRM2_HUMAN |
| 3847 | VGSSNFR200000                                      | sp P05787 K2C8_HUMAN  |
| 3848 | QLSGQSTSSDTTYK2000000000000                        | sp Q9UGU0 TCF20_HUMAN |
| 3849 | KASPEAASTPR2000000000                              | sp P29590 PML_HUMAN   |
| 3850 | VVSSTSEEEAFTEK22020000000000                       | sp Q8N573 OXR1_HUMAN  |
| 3851 | LLPYPTLASPASD200200                                | sp P0C1Z6 TFPT_HUMAN  |
| 3852 | KADSDSEDKGEESKPK20000000000000                     | sp P83916 CBX1_HUMAN  |
| 3853 | LHGGFSDCSEDGEALNGEPELDLTSK2. 002E+21               | sp 000178 GTPB1_HUMAN |
| 3854 | REESPMVDVQPSQAQDTQSIASDGTQGEK20000000000000        | sp Q7Z6Z7 HUWE1_HUMAN |
| 3855 | QGSITSPQANEQSVTPQRR200200000000200000              | sp Q9UQ35 SRRM2_HUMAN |

|      |                                                    |                       |
|------|----------------------------------------------------|-----------------------|
| 3856 | KFDHESSPGTDEDK2200200000                           | sp Q13427 PPIG_HUMAN  |
| 3857 | YFDTNSEVEEESEDEDYIPSEDWK2.000002E+20               | sp Q8N108 MIER1_HUMAN |
| 3858 | SLSQIHEAAVR2000000000                              | sp Q9NZM1 MYOF_HUMAN  |
| 3859 | ASAVSELSPR2000002000                               | sp Q9Y2W1 TR150_HUMAN |
| 3860 | FSISPEDESSSYSSNSDFNYSYPTK22000000000000            | sp Q96QD8 S38A2_HUMAN |
| 3861 | KASPEPPDSAEGALK20000000000000                      | sp Q9H1B7 I2BPL_HUMAN |
| 3862 | NDSPTQIPVSSDVCR20000000000000                      | sp Q8TC07 TBC15_HUMAN |
| 3863 | TSSSSPANSDVEIDGIGR2000020000000000                 | sp 060293 ZC3H1_HUMAN |
| 3864 | QIDSSPVGGETDETTVSQNYR200000000000                  | sp 015027 SC16A_HUMAN |
| 3865 | GTDTQTPAVLSPSK20000                                | sp P46087 NOP2_HUMAN  |
| 3866 | RPPSPEPSTK20000000                                 | sp Q01082 SPTB2_HUMAN |
| 3867 | KASQAASLASK2000000000                              | sp Q15154 PCM1_HUMAN  |
| 3868 | GLFQDESDSCDCSYR202000000                           | sp Q8NEM2 SHCBP_HUMAN |
| 3869 | AGSISTLDSLDFAR2000002000000                        | sp Q9P260 K1468_HUMAN |
| 3870 | AQSYDIQAWK200000000                                | sp Q8WWQ0 PHIP_HUMAN  |
| 3871 | GYNHGQGSYSYSNSYNSPGGGGSDYNYESK2E+20                | sp Q12906 ILF3_HUMAN  |
| 3872 | LPSDITDSDASEDPGGAER2020020020000000000             | sp Q9UJK0 TSR3_HUMAN  |
| 3873 | QSLPASPR2000                                       | sp Q3KQU3 MA7D1_HUMAN |
| 3874 | LLGPSAAADILQLSSSLPLQSR20000000                     | sp Q7Z6Z7 HUWE1_HUMAN |
| 3875 | VVLGDGVQLPPGDYSTTPGGTLFSTTPGGTR3000000000002000000 | sp Q13541 4EBP1_HUMAN |
| 3876 | TPASTPVSGTPQASPMIER2010000                         | sp Q9UHR4 BI2L1_HUMAN |
| 3877 | NSYNSQAPSPGLGSK20000000                            | sp Q9UHB7 AFF4_HUMAN  |
| 3878 | SPQTLAPVGEDAMKTPSPAAEDAR2.0000000010202E+21        | sp Q92797 SYMPK_HUMAN |
| 3879 | IPSIVSSPLNSPLDR2000200000                          | sp P49790 NU153_HUMAN |
| 3880 | MSSPEDSDTKR220000000000                            | sp Q15424 SAFB1_HUMAN |
| 3881 | I IPTLEGLQLPSPTATSQLPLESDAVECLNYQHYK2E+20          | sp P61978 HNRPK_HUMAN |
| 3882 | RDSSDWEIPDGQITVGQR200000000000000000               | sp P15056 BRAF_HUMAN  |
| 3883 | FFTTGSDSESESSLGEEELVTKPVGGNYGK2.0202202E+23        | sp B5ME19 EIFCL_HUMAN |
| 3884 | SASPHDVLCLVSPCFEHR2000000000000000000              | sp Q99613 EIF3C_HUMAN |
| 3885 | LGAGGSPEKSPSAQELK2000200000000                     | sp Q66K74 MAP1S_HUMAN |
| 3886 | SVSGSPEPAAK200020000000                            | sp Q9UNE7 CHIP_HUMAN  |
| 3887 | AQPFGFIDSDDAEER2020000000                          | sp Q8IYB3 SRRM1_HUMAN |
| 3888 | FNYSGSGGR20000                                     | sp Q14676 MDC1_HUMAN  |
| 3889 | EVDDILGEGSDSDSEK200002000                          | sp Q12906 ILF3_HUMAN  |
| 3890 | SSSPFLSK22000000                                   | sp Q9Y5B0 CTDP1_HUMAN |
| 3891 | DRPVGGSPGGPR2000000                                | sp Q9NYV4 CDK12_HUMAN |
| 3892 | TPLSSLSATSNNSTVACIDR2000000000000000000            | sp Q8NHG8 ZNRF2_HUMAN |
| 3893 | KPSGSPDLWKLSPDQR200000000200000                    | sp P00533 EGFR_HUMAN  |
| 3894 | AAYGDLSEEEEEENEPESLGVVYK3.00002E+22                | sp Q96JM3 CHAP1_HUMAN |
| 3895 | AASSSPGSPVASSPSR20000000000000                     | sp 015541 R113A_HUMAN |
| 3896 | LPSPTSPFSSLSQQAATSK2000000000000000                | sp Q92538 GBF1_HUMAN  |
| 3897 | SGISTNHADYSSSPAGSPGAQVSLYNPSVASPAR2.2E+24          | sp Q8WWI1 LMO7_HUMAN  |
| 3898 | QVSASELHTSGILGPETLR2000000000000000                | sp Q8WV41 SNX33_HUMAN |
| 3899 | TPTPSTPGDTQPNTAPVPPAEDGIK2E+21                     | sp P58107 EPIPL_HUMAN |
| 3900 | TESPPSPSSDVEDAR20000220000000                      | sp Q14839 CHD4_HUMAN  |
| 3901 | QPSWDPSVSSVTPAPSPLSAAAVSPSK2E+26                   | sp Q9BRK4 LZTS2_HUMAN |
| 3902 | SGSSQELDVKPSASPQER2020000000000000000              | sp Q9NQC3 RTN4_HUMAN  |
| 3903 | SPFNSPSPQDSPR20000020000000                        | sp Q9UQ35 SRRM2_HUMAN |
| 3904 | EGDPVSLSTPLETEFGSPSELSPR202000000                  | sp P08651 NFIC_HUMAN  |
| 3905 | SLSGSSPCPK20200200000                              | sp Q9BUR4 WAP53_HUMAN |
| 3906 | KRSSSEDAESLAPR2020000000000                        | sp Q9UQ35 SRRM2_HUMAN |
| 3907 | KRSDAGSSTPTTSTR20000000000000                      | sp Q4G0J3 LARP7_HUMAN |
| 3908 | SVASNQSEMEFSSLQDMPK20000100000001000               | sp P51532 SMCA4_HUMAN |
|      |                                                    | sp Q8N163 CCAR2_HUMAN |

|      |                                                  |                       |
|------|--------------------------------------------------|-----------------------|
| 3909 | KVVVSPTK20000                                    | sp P19338 NUCL_HUMAN  |
| 3910 | SPSSEWLVR2000000000                              | sp Q9NWQ4 GPT2L_HUMAN |
| 3911 | SFQQSSLSRDSQGHGR2002000000                       | sp P43243 MATR3_HUMAN |
| 3912 | AGEPNSPDAEEANSPDVTAGCDPAGVHPPR200020000000000000 | sp Q08J23 NSUN2_HUMAN |
| 3913 | TSSKESSPIPSPTSDR220002000000                     | sp Q01082 SPTB2_HUMAN |
| 3914 | AAKNSEEEEEEEK200000000                           | sp Q14978 NOLC1_HUMAN |
| 3915 | VSSPLSPSAMTDAANSQAAAK2E+21                       | sp Q8WXI9 P66B_HUMAN  |
| 3916 | SNSTTQVSQPR200000000000                          | sp Q9UPN4 CP131_HUMAN |
| 3917 | VELSESEEDKGGK20200000000                         | sp Q8IYB3 SRRM1_HUMAN |
| 3918 | TEARSSDEENGPPSSPDLDR22000000020000000            | sp Q96B36 AKTS1_HUMAN |
| 3919 | SQSLPTLLSPVR20000000000000                       | sp P28290 SSFA2_HUMAN |
| 3920 | SFEEEGEHLGSR20000000000000                       | sp Q9BXW6 OSBL1_HUMAN |
| 3921 | SPSVPKSPTPK2000200000                            | sp Q9NVD7 PARVA_HUMAN |
| 3922 | AQSLVISPPAPSPR200002000                          | sp P46013 KI67_HUMAN  |
| 3923 | KPSKYPLCSADAAVSTTPPGSPPPPPLPEPPVLK2.0002E+19     | sp Q9BTC0 DIDO1_HUMAN |
| 3924 | QGSGRESPLASR20000000                             | sp Q8WWM7 ATX2L_HUMAN |
| 3925 | NSLESISSIDR20020020000                           | sp Q14160 SCRIB_HUMAN |
|      |                                                  | sp Q29960 1C16_HUMAN  |
|      |                                                  | sp Q9TNN7 1C05_HUMAN  |
|      |                                                  | sp Q07000 1C15_HUMAN  |
|      |                                                  | sp Q29963 1C06_HUMAN  |
|      |                                                  | sp P30505 1C08_HUMAN  |
| 3926 | GGSCSQAASSNSAQGSDESLIACK2002000000               | sp P30508 1C12_HUMAN  |
|      |                                                  | sp Q95604 1C17_HUMAN  |
|      |                                                  | sp P04222 1C03_HUMAN  |
|      |                                                  | sp Q29865 1C18_HUMAN  |
|      |                                                  | sp P30504 1C04_HUMAN  |
|      |                                                  | sp P30510 1C14_HUMAN  |
| 3927 | STPESGSDKESVGSSTSNEGGR200020000000000000         | sp Q6GQQ9 OTU7B_HUMAN |
| 3928 | SISGTPAETPACK200000000000                        | sp Q9Y4D8 HECD4_HUMAN |
| 3929 | KKPSTDEQTSSAEEDVPTCGYLNVLNSNR2.20002E+26         | sp Q8N556 AFAP1_HUMAN |
| 3930 | AELGMDSTSQSPPIK200000                            | sp Q9NR19 ACSA_HUMAN  |
| 3931 | KEPAITSQNSPEAR200000000                          | sp P23193 TCEA1_HUMAN |
| 3932 | KFDHESSPGTDEDK200200000                          | sp Q13427 PPIG_HUMAN  |
| 3933 | NGFPHPEDCNPSEAASEESNSEIEQEIPVEQK2.000200202E+21  | sp Q9NR30 DDX21_HUMAN |
| 3934 | GSSGSPAHAESYSSGGGQK2E+20                         | sp P15408 FOSL2_HUMAN |
| 3935 | EQGTESRSSTPLPTISSAENTR2.0202E+20                 | sp P42167 LAP2B_HUMAN |
|      |                                                  | sp P42166 LAP2A_HUMAN |
| 3936 | SPGSSWQEYGPSDTCGSR200000000000000000             | sp Q5JSZ5 PRC2B_HUMAN |
| 3937 | TDSVIIADQTPPTR2020000                            | sp P17544 ATF7_HUMAN  |
| 3938 | SPSPYYSR202000000                                | sp Q13595 TRA2A_HUMAN |
|      |                                                  | sp P62995 TRA2B_HUMAN |
| 3939 | SKEFVSSDESSGENK220022000000                      | sp Q08945 SSRP1_HUMAN |
| 3940 | TASRPDDIPDSSPK200000002000000                    | sp Q5VZK9 LR16A_HUMAN |
| 3941 | SFSKEELMSSDLEETAGSTIPK200000000000000000         | sp O00567 NOP56_HUMAN |
| 3942 | YSPTSPTYSPTPK300000000020000                     | sp P24928 RPB1_HUMAN  |
| 3943 | SSSVGSSSYPISPAISR22000000000000000000            | sp Q15149 PLEC_HUMAN  |
| 3944 | FGQAATMEGIGAIGGTPPAFNR10000000020000000          | sp Q15233 NONO_HUMAN  |
| 3945 | TASQEGCQELTQEQR200000000000000000                | sp O43933 PEX1_HUMAN  |
| 3946 | SGSPAPETTNEVPFAQHSSLDSR2E+22                     | sp O15047 SET1A_HUMAN |
| 3947 | QNSDPTSEPGPSPNPPAWVRPDNEAPPK2E+27                | sp Q8N4C8 MINK1_HUMAN |
| 3948 | TQTPPLGQTPQLGLK20000000000000                    | sp P78344 IF4G2_HUMAN |
| 3949 | QSSGSATNVASTPDNR2000000000000000                 | sp Q7Z460 CLAP1_HUMAN |
| 3950 | RPASPSPEHLPATPAESPAQR220000000000000000          | sp Q9H7L9 SDS3_HUMAN  |

|      |                                                  |                        |
|------|--------------------------------------------------|------------------------|
| 3951 | DGDSYDPYDFSDTEEEMPQVHTPK300000000100002000       | sp P25205 MCM3_HUMAN   |
| 3952 | DGDHVCSTGPASSSGEDDDED22000000000                 | sp Q8NEL9 DDHD1_HUMAN  |
| 3953 | IALESEGRPEEQMESDNCSGGDDWTHLSSK200000000000000000 | sp Q13501 SQSTM_HUMAN  |
| 3954 | SNQIPTEVR2000000000                              | sp Q9BWH2 FUND2_HUMAN  |
| 3955 | QGSITSPQANEQSVTPQR20000002000000                 | sp Q9UQ35 SRRM2_HUMAN  |
| 3956 | SPPGAGSPPGAAVAPSALQLSPAAAAAAAHR2E+32             | sp P78415 IRX3_HUMAN   |
| 3957 | KPPAPSPVQSQSPSTNWSPAVPVKK2.000000002E+20         | sp Q8IYB3 SRRM1_HUMAN  |
| 3958 | ICPVPVSTVTGDENISDSEIEQYLR20000000000             | sp Q9HAW0 BRF2_HUMAN   |
| 3959 | FFTTGSDSESESSLGEEELVTKPVGGNYGK2.020202E+27       | sp B5ME19 EIFCL_HUMAN  |
|      |                                                  | sp Q99613 EIF3C_HUMAN  |
| 3960 | FSTYSQSPDTPSLR2000000000                         | sp Q6ZS17 FA65A_HUMAN  |
| 3961 | SLSEQPVMDTATATEQAK20000100000000000              | sp P18615 NELFE_HUMAN  |
| 3962 | LKLSPSSSR20200000                                | sp Q03252 LMNB2_HUMAN  |
|      |                                                  | sp P20700 LMNB1_HUMAN  |
| 3963 | NVSSFPDDATSPLQENR20000000                        | sp P52292 IMA1_HUMAN   |
|      |                                                  | sp P05534 1A24_HUMAN   |
|      |                                                  | sp Q09160 1A80_HUMAN   |
| 3964 | GGSYSQAASSDSAQGSVSLTACK2000000000                | sp P30447 1A23_HUMAN   |
|      |                                                  | sp P01891 1A68_HUMAN   |
|      |                                                  | sp P01892 1A02_HUMAN   |
|      |                                                  | sp P10316 1A69_HUMAN   |
| 3965 | RPDYAPMESSDEEDEFQFIKK2200000000000000            | sp P55081 MFAP1_HUMAN  |
| 3966 | SGSSPDSEITELK200000000000                        | sp P17812 PYRG1_HUMAN  |
| 3967 | SGSLDSELSVSPK2000                                | sp Q12802 AKP13_HUMAN  |
| 3968 | TASESISNLSEAGSIK20020002000                      | sp P30622 CLIP1_HUMAN  |
| 3969 | SGGLQTPECLSR200                                  | sp P85037 FO XK1_HUMAN |
| 3970 | SSTDSLPGPISR200000000000                         | sp Q9HCD5 NCOA5_HUMAN  |
| 3971 | SSTPLPTISSAENTR2000200000000000                  | sp P42167 LAP2B_HUMAN  |
|      |                                                  | sp P42166 LAP2A_HUMAN  |
| 3972 | QSSVTQVTEQSPK2000                                | sp Q14966 ZN638_HUMAN  |
| 3973 | GLVAAYSGESDSEEEQER2000020000000                  | sp P98175 RBM10_HUMAN  |
| 3974 | KPSDSLVAASSR2000000200                           | sp Q5T0W9 FA83B_HUMAN  |
| 3975 | KPSPQPSSPR22000                                  | sp 075909 CCNK_HUMAN   |
| 3976 | QGPPCSDSEEVER2020000000                          | sp 043159 RRP8_HUMAN   |
| 3977 | EIAIVHSDAEK200000                                | sp Q9H307 PININ_HUMAN  |
| 3978 | HASSPESPKPAPAPGSHR220002000000000000             | sp Q9UQ35 SRRM2_HUMAN  |
| 3979 | SQSSEGVSSLSSPSNSLETQSQSLSR2.02E+27               | sp 095155 UBE4B_HUMAN  |
| 3980 | TSSKESPIPSPTSDR200220002000000                   | sp Q01082 SPTB2_HUMAN  |
| 3981 | FYSDSHHLK20000000                                | sp Q92576 PHF3_HUMAN   |
| 3982 | EIPSATQSPISK200000                               | sp Q9BQG0 MBB1A_HUMAN  |
| 3983 | GLNSQSSDHLNKR200200000000                        | sp A8CG34 P121C_HUMAN  |
|      |                                                  | sp Q96HA1 P121A_HUMAN  |
| 3984 | RPQSPGASPSQAER200000000000                       | sp Q96T58 MINT_HUMAN   |
| 3985 | ASYHFSPEELDENTSPLLGDAR200000000                  | sp 075410 TACC1_HUMAN  |
| 3986 | MVEPENAVTITPLRPEDDYSPR2000                       | sp Q14160 SCRIB_HUMAN  |
| 3987 | KDSSGISEQLPCR2002000000000                       | sp Q8NEZ4 KMT2C_HUMAN  |
| 3988 | SCTPSPDQISHR2000200000000                        | sp Q7Z2W4 ZCCHV_HUMAN  |
| 3989 | GSESPMGPEVTPAPR20000000000000                    | sp P48382 RF X5_HUMAN  |
| 3990 | SGSSQELDVKPSASPQR2000000020000000                | sp Q9UQ35 SRRM2_HUMAN  |
| 3991 | GIQYIDLSSDSEDVVPNCNTVQEK2.202E+19                | sp Q9H4L7 SMRCD_HUMAN  |
| 3992 | KEESEESDDMGFLFD200010000000                      | sp P05387 RLA2_HUMAN   |
|      |                                                  | sp P05386 RLA1_HUMAN   |
| 3993 | ALASNTSFFSGCSPIEEEAH200000000                    | sp 095239 KIF4A_HUMAN  |
|      |                                                  | sp Q2VIQ3 KIF4B_HUMAN  |

|      |                                                 |                       |
|------|-------------------------------------------------|-----------------------|
| 3994 | QKSDAEEDGGTVSQEEEDR2000000000                   | sp P27824 CALX_HUMAN  |
| 3995 | LTPVSPESSTEELK20002000000                       | sp Q13501 SQSTM_HUMAN |
| 3996 | NDSPTQIPVSSDVCR200000000000                     | sp Q8TC07 TBC15_HUMAN |
| 3997 | RASQEANLLTLAQK2000000000000                     | sp Q6PJG2 EMSA1_HUMAN |
| 3998 | VGTEGLVDSFSQGLER2000000000                      | sp 075170 PP6R2_HUMAN |
| 3999 | SGIDITDFQAK2000000000000                        | sp P49790 NU153_HUMAN |
| 4000 | ASASGSGAQVGGPISSGSSASSVTVTR2020000000           | sp P02545 LMNA_HUMAN  |
| 4001 | AGMSSNQSISSPVLDVPR2022000000000                 | sp Q9UQ35 SRRM2_HUMAN |
| 4002 | EISPGSGPGEIR200000000000                        | sp 043491 E41L2_HUMAN |
| 4003 | SPQPPSR200000000                                | sp Q86VM9 ZCH18_HUMAN |
| 4004 | TPLTSADEHVHVK20022000000000                     | sp Q5SW79 CE170_HUMAN |
| 4005 | VTQHESDNENEIQIQNK2000000000000                  | sp Q5VZL5 ZMYM4_HUMAN |
|      |                                                 | sp P30505 1C08_HUMAN  |
|      |                                                 | sp Q9TNN7 1C05_HUMAN  |
|      |                                                 | sp Q29960 1C16_HUMAN  |
|      |                                                 | sp P30508 1C12_HUMAN  |
|      |                                                 | sp Q95604 1C17_HUMAN  |
| 4006 | GGSCSQAASSNSAQGSDESLIACK2E+20                   | sp Q07000 1C15_HUMAN  |
|      |                                                 | sp Q29963 1C06_HUMAN  |
|      |                                                 | sp P30510 1C14_HUMAN  |
|      |                                                 | sp P04222 1C03_HUMAN  |
|      |                                                 | sp Q29865 1C18_HUMAN  |
|      |                                                 | sp P30504 1C04_HUMAN  |
| 4007 | GPAAPLTPGPQSPPTPLAPGQEK2000020000000000000      | sp 075398 DEAF1_HUMAN |
| 4008 | SASPHVDLCLVSPCFEHR2000000000200000000           | sp Q66K74 MAP1S_HUMAN |
| 4009 | GLGPPSPAPP20000000                              | sp Q13425 SNTB2_HUMAN |
| 4010 | VVEAVNSDSEFGIPKK2020000000000                   | sp Q02880 TOP2B_HUMAN |
| 4011 | GTEPSPGGTPQPSRPVSPAGPPEGVPEEAQPPR2.00000002E+29 | sp Q8WUZ0 BCL7C_HUMAN |
| 4012 | ERSDSGSSSEPFDR200200000000                      | sp P48634 PRC2A_HUMAN |
| 4013 | LPSPTSPFSSLSQDQAATSK20020000000000000           | sp Q8WWI1 LM07_HUMAN  |
| 4014 | TVSPGVSPIHGQGVVENLK2.00002E+19                  | sp Q9NZM3 ITSN2_HUMAN |
| 4015 | LQAALDDEEAGGRPAMEPGNGSLDLGGDSAGR2000000000000   | sp Q00839 HNRPU_HUMAN |
| 4016 | LPDGPTGSSEEEEFLEIPPFNK2200000000000000000       | sp Q12888 TP53B_HUMAN |
| 4017 | EAPGSPPLSPR20000000                             | sp Q86UU0 BCL9L_HUMAN |
| 4018 | NSLEISSIDR200000000000                          | sp Q14160 SCRIB_HUMAN |
| 4019 | ASGEMASQYITAALR20010000000000000                | sp P54578 UBP14_HUMAN |
| 4020 | LGMLSPEGTCK20000000                             | sp P49327 FAS_HUMAN   |
| 4021 | GRLTPSPDIIVLSDNEASSPR200000000000002000         | sp Q8WXI9 P66B_HUMAN  |
| 4022 | IILDLISESPIK20000                               | sp P61978 HNRPK_HUMAN |
| 4023 | EWYQSTIPQSPAPDDPEEGR202000000000000             | sp Q08499 PDE4D_HUMAN |
| 4024 | ENSPAVSPTTNSTAPFGLKPR2020000000000000000        | sp Q9Y2L9 LRCH1_HUMAN |
| 4025 | RFSSSDFSDLSNGEELQETCSSLR2.22002002E+23          | sp P23497 SP100_HUMAN |
| 4026 | HQQQLLASPGSSTVDNK20000000000                    | sp Q9C0E2 XPO4_HUMAN  |
| 4027 | LPSTSGSEGVPR202020000000                        | sp P29317 EPA2_HUMAN  |
| 4028 | TSSVSSISQVSPER200000000000000                   | sp P42356 PI4KA_HUMAN |
| 4029 | DLVQDPKPASP2000                                 | sp Q6PJT7 ZC3HE_HUMAN |
| 4030 | GGSSVEAPCPDVTPEDDR2000000                       | sp Q9BY89 K1671_HUMAN |
| 4031 | RPSTSQTVSTPAPVPVIESTEAEAK2E+23                  | sp P12270 TPR_HUMAN   |
| 4032 | SLSPSHLTEDR2000000000000                        | sp Q5T200 ZC3HD_HUMAN |
| 4033 | DEVFHTDQDDPSSSDDEGMPYTRPVK2220000100000000      | sp Q5JSH3 WDR44_HUMAN |
| 4034 | LQLQLDLSSR2000                                  | sp P49454 CENPF_HUMAN |
| 4035 | SPGVEKPIVKPTAGAGPQETNMK2E+23                    | sp Q76L83 ASXL2_HUMAN |

|      |                                                 |                       |
|------|-------------------------------------------------|-----------------------|
|      |                                                 | sp P49792 RBP2_HUMAN  |
|      |                                                 | sp Q7Z3J3 RGPD4_HUMAN |
| 4036 | LNQSGTSVGTDEESDVTQEEER2.022E+19                 | sp A6NKT7 RGPD3_HUMAN |
|      |                                                 | sp PODJD0 RGPD1_HUMAN |
|      |                                                 | sp PODJD1 RGPD2_HUMAN |
| 4037 | SNSRLEDQVIGVALQASK200000000000000000            | sp Q2KHR3 QSER1_HUMAN |
| 4038 | TTWGDGGENSPCNVSK200000000                       | sp 000161 SNP23_HUMAN |
| 4039 | DGTAPPQSPGSPGTQDEEWSDEESPR200000000020000000    | sp Q9UKS6 PACN3_HUMAN |
| 4040 | SVSGSPEPAAK202020000000                         | sp Q8IYB3 SRRM1_HUMAN |
| 4041 | SVNEILGLAESSPNEPK2000000                        | sp Q9H8G2 CAAP1_HUMAN |
| 4042 | LGSTSGEESDLER220000200000                       | sp Q9BW71 HIRP3_HUMAN |
| 4043 | DNLGEVPLTPTEEASLPLAVTK2000000000000000          | sp Q6ZJ1 NBEL2_HUMAN  |
| 4044 | TPSSPLQSCTPSLSR2000000000000000                 | sp Q96AP0 ACD_HUMAN   |
| 4045 | EDTDHEEKASNEVDTK20000000                        | sp 075475 PSIP1_HUMAN |
| 4046 | QTDPSTPQQESSKPLGGIQPSSQTIQPK2E+24               | sp Q14004 CDK13_HUMAN |
| 4047 | TDHGAEIVYKSPVVGDTSPR20022000                    | sp P10636 TAU_HUMAN   |
|      |                                                 | sp TAU_HUMAN          |
| 4048 | YSHSYLSDSDTEAK2000000                           | sp Q92614 MY18A_HUMAN |
| 4049 | SISLGDSEGPVATLAQPLR2000000000000000             | sp 043379 WDR62_HUMAN |
| 4050 | EAEQAASEAAGGDTTPGSSPSSLYEEPLGQPPR2E+28          | sp Q86TC9 MYPN_HUMAN  |
| 4051 | MEREDSSEEEEEIDDEEIER220000000000000000          | sp P55081 MFAP1_HUMAN |
| 4052 | LASTSDIEEK202000000                             | sp 014974 MYPT1_HUMAN |
| 4053 | ENSTVDFSK20000000                               | sp Q6U841 S4A10_HUMAN |
|      |                                                 | sp Q9Y6M7 S4A7_HUMAN  |
| 4054 | REPESPPASAPIPLFGADTIGQR2E+19                    | sp Q96AY4 TTC28_HUMAN |
| 4055 | ELQGDGPPSSPTNDPTVK200000000000                  | sp Q12873 CHD3_HUMAN  |
| 4056 | KKSSSEAKPTSLGLAGGHK202000000000000000           | sp Q96RK0 CIC_HUMAN   |
| 4057 | LPPAAPIADSENNSTMASASEGEMECGQELK2020000000000000 | sp Q63HN8 RN213_HUMAN |
| 4058 | SPFEGAVTESQSLFSDNFR2E+19                        | sp 095628 CNOT4_HUMAN |
| 4059 | SPQPAEEDDDFDLVAIDTYNCDLHFK2E+30                 | sp Q9BUJ2 HNRL1_HUMAN |
| 4060 | LDSSPSVSSTLAAK2000000000000000                  | sp Q13428 TCOF_HUMAN  |
| 4061 | LGSTSGEESDLER202000200000                       | sp Q9BW71 HIRP3_HUMAN |
| 4062 | CPEILSDESSDEDEKK20022000000000                  | sp P35659 DEK_HUMAN   |
| 4063 | STSPAGQHHSPISR2200000020000000                  | sp Q5T200 ZC3HD_HUMAN |
| 4064 | GKASPFEEDQNR2000000000                          | sp Q8TB72 PUM2_HUMAN  |
| 4065 | RPESPSEISPIK2000020000                          | sp Q7Z5K2 WAPL_HUMAN  |
| 4066 | SKFDSDEEEEDTENVEAASSGKVTR2.0000000000002E+21    | sp Q8TF01 PNISR_HUMAN |
| 4067 | AAALQALQAQAPTSPPPPPPLK200000000000              | sp Q8NAF0 ZN579_HUMAN |
| 4068 | TTSISPALAR202000000                             | sp Q9UKE5 TNIK_HUMAN  |
| 4069 | EVDPTGELQSLQMPESGSSLDPSQEGPTGLK20000000000000   | sp Q13501 SQSTM_HUMAN |
| 4070 | TPPVVIK20000000                                 | sp Q96A49 SYAP1_HUMAN |
| 4071 | DDISEIQSLASDHSGR2000                            | sp Q07157 ZO1_HUMAN   |
|      |                                                 | sp P30505 1C08_HUMAN  |
|      |                                                 | sp Q9TNN7 1C05_HUMAN  |
|      |                                                 | sp Q29960 1C16_HUMAN  |
|      |                                                 | sp Q07000 1C15_HUMAN  |
|      |                                                 | sp Q29963 1C06_HUMAN  |
| 4072 | GGSCSQAASSNSAQGSDESLIACK20000000000000          | sp P30508 1C12_HUMAN  |
|      |                                                 | sp Q95604 1C17_HUMAN  |
|      |                                                 | sp P30510 1C14_HUMAN  |
|      |                                                 | sp P04222 1C03_HUMAN  |
|      |                                                 | sp Q29865 1C18_HUMAN  |
|      |                                                 | sp P30504 1C04_HUMAN  |
| 4073 | AESSSSISSASLSAANTPTVGVSR220202000000000000      | sp Q0JRZ9 FCHO2_HUMAN |

|      |                                                             |    |           |             |
|------|-------------------------------------------------------------|----|-----------|-------------|
| 4074 | APAGQEEPGTPSSPLSAEQ LDR200200000000000                      | sp | P13051    | UNG_HUMAN   |
| 4075 | ASETVSEASPGSTASQTGVPTQVVQQVQGTQQR2E+28                      | sp | P22670    | RFX1_HUMAN  |
| 4076 | SEESPVYNSSSVR20000000000                                    | sp | Q03188    | CENPC_HUMAN |
| 4077 | EVEEDESEDEEMSEDEEDSSGEEVVIPQK2. 00001200000022E+24          | sp | P19338    | NUCL_HUMAN  |
| 4078 | ETSSPGTDDVFTPAPSDSPSSQR2000000                              | sp | P19634    | SL9A1_HUMAN |
| 4079 | SGGLQTPECLSR20000200                                        | sp | P85037    | FOXK1_HUMAN |
| 4080 | GSPRPPPPPPPLLGTVSSPSSSPTHLWTGEVSAAPPPAR2. 0000000000002E+38 | sp | Q6P1L5    | F117B_HUMAN |
| 4081 | SPSGPSGSLENGTK2000000000000                                 | sp | Q14134    | TRI29_HUMAN |
| 4082 | KTSLSDLNDPIILSSDDDDNDNR2. 0000000022E+19                    | sp | Q9GZR1    | SENP6_HUMAN |
| 4083 | SSDIVSSVR200000000                                          | sp | Q14C86    | GAPD1_HUMAN |
| 4084 | AAVVTSPPTTAPHK20000000000                                   | sp | P35611    | ADDA_HUMAN  |
| 4085 | VAHSDKPGSTSTASFR200000000                                   | sp | Q9P0L0    | VAPA_HUMAN  |
| 4086 | YHGHSMSDPGVSYR21000002000                                   | sp | P08559    | ODPA_HUMAN  |
| 4087 | VDSDSDSSEDDINSVMK20202000000000000                          | sp | P29803    | ODPAT_HUMAN |
| 4088 | SPSAMQQQDGLDR200000000000000                                | sp | Q6KC79    | NIPBL_HUMAN |
| 4089 | KPLTTSGFHHSEEGTSSSGSK2000000000000                          | sp | 060343    | TBCD4_HUMAN |
| 4090 | NSQEDSEDEDKDVK20000000                                      | sp | Q5SW79    | CE170_HUMAN |
| 4091 | SSSVGSSSYPI SPAVSR200000000000000                           | sp | Q9H1E3    | NUCKS_HUMAN |
| 4092 | VNPHKVPASSVDSNIPSSQGYK220000000000000                       | sp | Q15149    | PLEC_HUMAN  |
| 4093 | YESQEPLAGQESPLPLATR200000000                                | sp | Q9UHB7    | AFF4_HUMAN  |
| 4094 | SPELEGEKLSPLPGGPGAGDPR2. 000000002E+22                      | sp | Q9COC2    | TB182_HUMAN |
| 4095 | DSSKGEDSAEETEAKPAVVAPAPVVEAVSTPSAAFPSDATAEQGPILTK2E+20      | sp | Q15742    | NAB2_HUMAN  |
| 4096 | RNSSPVSPASVPGQR220000000000000                              | sp | Q12906    | ILF3_HUMAN  |
| 4097 | TDHGAEIVYKSPVSGDTSR200000002000                             | sp | Q9H1B7    | I2BPL_HUMAN |
| 4098 | NQSLGQSAPSLTAGLK20000000000                                 | sp | TAU_HUMAN |             |
|      |                                                             | sp | P10636    | TAU_HUMAN   |
|      |                                                             | sp | Q6P0Q8    | MAST2_HUMAN |
|      |                                                             | sp | P05534    | 1A24_HUMAN  |
|      |                                                             | sp | P30447    | 1A23_HUMAN  |
| 4099 | KGGSYSQAASSDSAQGS DVSLTACK2E+22                             | sp | P01891    | 1A68_HUMAN  |
|      |                                                             | sp | P01892    | 1A02_HUMAN  |
|      |                                                             | sp | Q09160    | 1A80_HUMAN  |
|      |                                                             | sp | P10316    | 1A69_HUMAN  |
| 4100 | EEDEEPESPPEK200000                                          | sp | Q9H1E3    | NUCKS_HUMAN |
| 4101 | SQSSEGVSSLSSSPNSLETQSQSLSR2. 0002E+24                       | sp | 095155    | UBE4B_HUMAN |
| 4102 | RKPEDVLDDDDAGSAPLK200000                                    | sp | P35613    | BASI_HUMAN  |
| 4103 | SPSVSPEPAEK2020220000000                                    | sp | Q9UQ35    | SRRM2_HUMAN |
| 4104 | DPLTHTSNLPR20000                                            | sp | Q9UBP0    | SPAST_HUMAN |
| 4105 | TPILEDFELEGVCQLPDQSPPR20000                                 | sp | Q7Z2Z1    | TICRR_HUMAN |
| 4106 | SPAVKPAAPK2000000000000                                     | sp | Q14978    | NOLC1_HUMAN |
| 4107 | EEPSQNDISPK2000                                             | sp | Q9NR30    | DDX21_HUMAN |
| 4108 | DGLNQTTIPVSPSTTKPSR20000000000                              | sp | Q71RC2    | LARP4_HUMAN |
| 4109 | AQQGADESSENEEEEEIELIPEK2200000000000000                     | sp | Q9Y4A0    | JERKL_HUMAN |
| 4110 | SVSTPSEAGSQDSGDGAVGSR2000000000000000000                    | sp | Q13409    | DC1I2_HUMAN |
| 4111 | SGLELTELQNMTPEDDNISNDSNDFTEVENGQINSK1. 200000002E+27        | sp | Q9H2H9    | S38A1_HUMAN |
| 4112 | VLSTSTDLEAAVADALK200000000000000                            | sp | Q7Z460    | CLAP1_HUMAN |
| 4113 | SLSNSNPDISGTPTSPDDEV2. 02E+21                               | sp | Q96N67    | DOCK7_HUMAN |
| 4114 | SPSKPLPEVTDEYK2000000000000                                 | sp | P05455    | LA_HUMAN    |
| 4115 | TMFAQVESDDEEAKNEPEWK200000000000000                         | sp | Q9NW82    | WDR70_HUMAN |
| 4116 | KELSESEDEELQLEEFPLMK2002000000000000000                     | sp | Q99543    | DNJC2_HUMAN |
| 4117 | TNSSDSERSPDLGHSTQIPR2020000000000000000                     | sp | Q6VY07    | PACS1_HUMAN |

|      |                                                                    |                       |
|------|--------------------------------------------------------------------|-----------------------|
| 4118 | LQTPNTFPK20020000                                                  | sp Q14978 NOLC1_HUMAN |
| 4119 | KVELSESEEDK20200000                                                | sp Q8IYB3 SRRM1_HUMAN |
| 4120 | AAPEASSPPASPLQHLLPGK2000020000000000                               | sp Q96TA1 NIBL1_HUMAN |
| 4121 | ISASSATR20000000                                                   | sp P49023 PAXI_HUMAN  |
| 4122 | SPSAIPEQNHSLNDQAK200000000000000000                                | sp Q13129 RLF_HUMAN   |
| 4123 | AGSISTLDSLDFAR20020020000000                                       | sp Q9P260 K1468_HUMAN |
| 4124 | TQLWASEPGTPPLPTSLPSQNPILK2E+20                                     | sp Q9BXP5 SRRT_HUMAN  |
| 4125 | SSEGGVGVGPGGGDEPPTSPPR2E+20                                        | sp Q9Y4H2 IRS2_HUMAN  |
| 4126 | FNGGHSPHSPK200020000                                               | sp Q9Y5K6 CD2AP_HUMAN |
| 4127 | IKEEPEVEVDSSPPDSPASSPCSPPLK220000002200000000                      | sp P17544 ATF7_HUMAN  |
| 4128 | EYIPGQPPLSQSSDSSPTR20000                                           | sp P07814 SYEP_HUMAN  |
| 4129 | SGSPAPETTNESVPFAQHSSLSR2. 00002E+22                                | sp O15047 SET1A_HUMAN |
| 4130 | WTISSSESEEEKPKPKPSTSSLLCAR2. 22002E+25                             | sp Q9NUW8 TYDP1_HUMAN |
| 4131 | MSDSESEELPKPVSDSESEEPPI. 20200000000002E+24                        | sp Q96ST2 IWS1_HUMAN  |
| 4132 | YETPSDAIEVISPASSAPPQEK20000000000000                               | sp O75376 NCOR1_HUMAN |
| 4133 | QSHSGSISPYPK20200000                                               | sp Q9UQ35 SRRM2_HUMAN |
| 4134 | KPHDCESSTVSEEDYFSSHR2220200000000000                               | sp Q9H4H8 FA83D_HUMAN |
| 4135 | FSEMMNMGDEDVDLPEVDGADDDSDSDEK1. 0001E+30                           | sp Q15185 TEBP_HUMAN  |
| 4136 | SAGGSSPEGGEDSDREDGNYCPPVKR2. 20000002E+22                          | sp Q9H6Z4 RANB3_HUMAN |
| 4137 | QFLISPPASPPVGWK200020000000                                        | sp P53805 RCAN1_HUMAN |
| 4138 | SEAEEGEVTRPTK20000000020000                                        | sp Q9UKA8 RCAN3_HUMAN |
| 4139 | AGMSSNQSISSPVLDVPR200000020000000000                               | sp Q9H4G0 E41L1_HUMAN |
| 4140 | EKGSTLDSLDAEK200000000000                                          | sp Q9UQ35 SRRM2_HUMAN |
| 4141 | AVATAAAQAQTGPEEDSGSSEEEESDSEEEAETLAQVKPSGK2. 000002022000<br>2E+31 | sp O00767 ACOD_HUMAN  |
| 4142 | TSPLNSSGSSQGR20000000000000                                        | sp Q13428 TCOF_HUMAN  |
| 4143 | AATAARPPAPPAPQPPSPTSPRPTLAR20002000000000                          | sp P51003 PAPOA_HUMAN |
| 4144 | GGPGAAPGGASPASSSAASSPSSGR2000000                                   | sp Q96B36 AKTS1_HUMAN |
| 4145 | VHPYEDSDSEDEVDWQDTR300002200000000000                              | sp Q9BXX1 KLF16_HUMAN |
| 4146 | KAPAGQEEPGTPSSPLSAEQ LDR2000000000000000                           | sp O14730 RIOK3_HUMAN |
| 4147 | SLSESSVIMDR202002000000                                            | sp P13051 UNG_HUMAN   |
| 4148 | AQSPGAVEEILDR200000000000                                          | sp Q9H2Y7 ZN106_HUMAN |
| 4149 | LEVTEIVKPSPK2000                                                   | sp Q9NYM9 BET1L_HUMAN |
| 4150 | SRSPLLEPEAK200000000000                                            | sp Q7Z6E9 RBBP6_HUMAN |
| 4151 | HEAPSSPISGQPCGDDQNASPSK2E+19                                       | sp Q92466 DDB2_HUMAN  |
| 4152 | KDDSHAEDSEDEKEDHK2000002000000000                                  | sp O75376 NCOR1_HUMAN |
| 4153 | TPQSPTLPPAK200000000                                               | sp Q9H1E3 NUCKS_HUMAN |
| 4154 | SRSSPVTELASR20002000000000                                         | sp P78310 CXAR_HUMAN  |
| 4155 | KQHLYSSEDEPDNDVLDLDR2200000000000000                               | sp Q9UQ35 SRRM2_HUMAN |
| 4156 | LPSSGLPAADVSPATAEEPLSPSTPTR20200000                                | sp Q8NFC6 BD1L1_HUMAN |
| 4157 | FSISPDESSSYSSNSDFNYSYPTK20200000000000                             | sp O43149 ZZEF1_HUMAN |
| 4158 | VISDESIDIGGSDVEFKPDK2. 0002E+19                                    | sp Q96QD8 S38A2_HUMAN |
| 4159 | SPAGSPELR2000000000                                                | sp P52701 MSH6_HUMAN  |
| 4160 | GPPDFSSDEEREPTPVLGSGAAAAGR2. 0000002E+20                           | sp Q96JM3 CHAP1_HUMAN |
| 4161 | DGTAPPQSPGSPGTGQDEEWSDEESPR2. 0000000000002E+20                    | sp P42166 LAP2A_HUMAN |
| 4162 | LGPGRPLPTFPTSECTSDVEPDTR2000000000                                 | sp P42167 LAP2B_HUMAN |
| 4163 | SPSAEFSPAAPPGISSIHSPSLR2E+23                                       | sp Q9UKS6 PACN3_HUMAN |
| 4164 | ELEEVSPETPVVATTQR20000000000000                                    | sp Q8TDD1 DDX54_HUMAN |
| 4165 | KPPAPPSPVQSQSPSTNWSPAVPVKK2. 000000002002E+20                      | sp Q68DK2 ZFY26_HUMAN |
| 4166 | ISMQDVDSLGLSPK2000                                                 | sp Q15149 PLEC_HUMAN  |
| 4167 | GSFSSSENYWR2000000000                                              | sp Q8IYB3 SRRM1_HUMAN |
| 4168 | STGSATSLASQGER200000200000                                         | sp Q09666 AHNK_HUMAN  |
|      |                                                                    | sp Q6P6C2 ALKB5_HUMAN |
|      |                                                                    | sp Q5SW79 CE170_HUMAN |



|      |                                                   |                       |
|------|---------------------------------------------------|-----------------------|
| 4169 | DSHSSEEDEASSQTDLSQTISK2. 022E+21                  | sp Q5JTV8 TOIP1_HUMAN |
| 4170 | AAALQALQAQAPTSPPPPPPLK20000000000                 | sp Q8NAF0 ZN579_HUMAN |
| 4171 | KRESESEDETTPAAPQLIK202000020000000000             | sp 060832 DKC1_HUMAN  |
| 4172 | EVSPSDVR2000000                                   | sp Q8WYP5 ELYS_HUMAN  |
| 4173 | VTLYNTDQDGS DSPR2000                              | sp Q9UPW0 FOXJ3_HUMAN |
| 4174 | SPPGSGASTPVGPWDQAVQR20000000000000                | sp Q8TE77 SSH3_HUMAN  |
| 4175 | DGETLEGSDAEESL DK2000000000                       | sp Q9P2D1 CHD7_HUMAN  |
| 4176 | TNSSDSERSPDLGHSTQIPR220200000000000000            | sp Q6VY07 PACS1_HUMAN |
| 4177 | SVCPGSSSPGSSSGGR20000000                          | sp Q53LP3 SWAHC_HUMAN |
| 4178 | GIPHSASPVSPDGVIPLK2002000000000000                | sp Q6PJF5 RHDF2_HUMAN |
| 4179 | KETPPPLVPPAAR200000000000                         | sp Q9BQA1 MEP50_HUMAN |
| 4180 | AKPAMPQDSVPSPR10000002000                         | sp P53396 ACLY_HUMAN  |
| 4181 | LSSWDQAETPGHTPSLR2000200000                       | sp 075533 SF3B1_HUMAN |
| 4182 | NAEAVLQSPGLSGK20000000                            | sp Q13045 FLII_HUMAN  |
| 4183 | CPFPAGAALACSEDEEDDEEHEGGSR2000000000000000        | sp Q147X3 NAA30_HUMAN |
| 4184 | VESLESLYFTPIPAR20000000000000                     | sp Q14980 NUMA1_HUMAN |
| 4185 | AAHTEDINACTLTTSPR20000                            | sp P04049 RAF1_HUMAN  |
| 4186 | SSGSPYGGYGGSGGGSGYGSR300000000000000000           | sp P51991 ROA3_HUMAN  |
| 4187 | SQSSEGVSSLSSSPNSLETQSQSLSR2E+19                   | sp 095155 UBE4B_HUMAN |
| 4188 | TETLVEETAAESSEDDVAPSQSLLSGYMTPGLTPANSQASK2. 2E+31 | sp Q13428 TCOF_HUMAN  |
| 4189 | TDASSASSFLDSELER220000000000                      | sp Q14498 RBM39_HUMAN |
| 4190 | SRSSSPVTELASR20200000000000                       | sp Q9UQ35 SRRM2_HUMAN |
| 4191 | CPEILSDESSSDEDEKK20002200000000                   | sp P35659 DEK_HUMAN   |
| 4192 | SPTGPSNSFLANMGTVAHK2. 000000000001E+20            | sp Q96I25 SPF45_HUMAN |
| 4193 | VASSPVMVSNPATR200000000000                        | sp P51610 HCFC1_HUMAN |
| 4194 | SPGPPPVGVK200000000000                            | sp Q9H1B7 I2BPL_HUMAN |
| 4195 | QVSSPSFTNR20000000                                | sp Q86V48 LUZP1_HUMAN |
| 4196 | LKSDERPVIHK2000000000                             | sp Q9UPN9 TRI33_HUMAN |
| 4197 | SQSESSDEVTELDLSHGK200200000000000000              | sp Q86YS7 C2CD5_HUMAN |
| 4198 | NYAGEEEEEEGSGSSEGFDPATDR2020000000000000          | sp P16989 YBOX3_HUMAN |
| 4199 | SQSPVHLR202000000                                 | sp Q96T58 MINT_HUMAN  |
| 4200 | GDSESEDEDELEVVPVPSR200000000000000000             | sp P13861 KAP2_HUMAN  |
| 4201 | ANTLSPVR20000                                     | sp Q9H792 PEAK1_HUMAN |
| 4202 | TSAACA VTDLSDDSD FDEK2000000                      | sp Q9NQZ2 SAS10_HUMAN |
| 4203 | IASP VSR200000                                    | sp P09884 DPOLA_HUMAN |
| 4204 | STSAPQMSPGSSDNQSSSPQPAQK1. 0002E+19               | sp Q14157 UBP2L_HUMAN |
| 4205 | STDSPGADAELPES AAR2000000000000000                | sp Q9Y4K1 AIM1_HUMAN  |
| 4206 | KEPDDSRDEDEDEDESSEEDSEDEEPPPK2200020000000000     | sp Q5SSJ5 HP1B3_HUMAN |
| 4207 | EMEHTVCAAGTSPVGEIGEEK1. 00000000002E+21           | sp P18583 SON_HUMAN   |
| 4208 | GDSLKEPTSIAESSR20000000000000                     | sp Q9C0B5 ZDHC5_HUMAN |
| 4209 | STSPIIGSPVVR200000000000                          | sp Q86TB9 PATL1_HUMAN |
| 4210 | SGSSSPDSEITELKFPSINHD200000000000000000           | sp P17812 PYRG1_HUMAN |
| 4211 | ASPPASPIAFPPAFEAQVEAKPDELK2. 0002E+27             | sp Q8NEZ4 KMT2C_HUMAN |
| 4212 | NSSPAPPQPAPGK20000000000000                       | sp Q9NYV4 CDK12_HUMAN |
| 4213 | NSSDSAIDNPKPNK20000000000000                      | sp P46100 ATRX_HUMAN  |
| 4214 | GHTDTEGRPPSPPTSTPEK220000                         | sp Q00613 HSF1_HUMAN  |
| 4215 | LKSVEDEMDS PGEEPFTGQGR2000000000000000            | sp Q12857 NFIA_HUMAN  |
| 4216 | TASRPDDIPDPS SPSK2002000                          | sp Q5VZK9 LR16A_HUMAN |
| 4217 | DHAPSIPTSPFGDSLESSTELR2000000000000000            | sp Q9Y4B5 MTCL1_HUMAN |
| 4218 | SLSSSPVKK2000200000                               | sp Q9H3Q1 BORG4_HUMAN |
| 4219 | SNSDES NFSEK2000000000                            | sp 095999 BCL10_HUMAN |
| 4220 | ELSPAGSISK200000000                               | sp 095453 PARN_HUMAN  |
| 4221 | SPTTASVSATAAPR20000000000000                      | sp Q15723 ELF2_HUMAN  |

|      |                                                   |                       |
|------|---------------------------------------------------|-----------------------|
| 4222 | LASPELER2000000                                   | sp P17535 JUND_HUMAN  |
|      |                                                   | sp P05412 JUN_HUMAN   |
| 4223 | EDNSSEEEEEIEPFPEER2200000000000000                | sp Q4LE39 ARI4B_HUMAN |
| 4224 | SVDAIGGESMPIPTIDTSR2E+19                          | sp Q9BWT3 PAPOG_HUMAN |
| 4225 | LGHPEALSAGTGSPQPPSFTYAQQR20000000000000           | sp Q15942 ZYG_HUMAN   |
| 4226 | CPEILSDESSSDEDEKK2220000000                       | sp P35659 DEK_HUMAN   |
| 4227 | ASESSKPWPDATYGTGSASR20000                         | sp Q9Y2W1 TR150_HUMAN |
| 4228 | DCSYGAVTSPTSTLESR2000000000                       | sp Q9HCD6 TANC2_HUMAN |
| 4229 | LCDPDGLSDEEDQKPVR20000000000                      | sp Q96RY5 CRML_HUMAN  |
| 4230 | GYSPYSVSGSGSTAGSR2200000                          | sp Q15149 PLEC_HUMAN  |
| 4231 | KASATCSSATAAASSGLEEWSR2000000000000000            | sp Q96G74 OTUD5_HUMAN |
| 4232 | MQNTDDEERPQLSDDER200000000200000                  | sp Q8WVC0 LEO1_HUMAN  |
| 4233 | AASDLLSSVSPAVSK200000200                          | sp P19532 TFE3_HUMAN  |
| 4234 | SESSDFEVVVK200200000000                           | sp Q9Y520 PRC2C_HUMAN |
| 4235 | EEGPPPPSPDGASSDAEPEPPSGR2200000000000             | sp Q9NTJ3 SMC4_HUMAN  |
| 4236 | ENASPAPGTTAEEMSR200000000001000                   | sp P46379 BAG6_HUMAN  |
| 4237 | HQQQLLASPGSSTVDNK2000000                          | sp Q9C0E2 XPO4_HUMAN  |
| 4238 | TLSDPPSPLPHGPPNK2000200000000000                  | sp Q9ULH1 ASAP1_HUMAN |
| 4239 | HTGMASIDSSAPETTSDSPTLSR2000000                    | sp A7E2V4 ZSWM8_HUMAN |
| 4240 | SLSGSSPCPK200200000                               | sp Q9UQ35 SRRM2_HUMAN |
| 4241 | SRSGEGEVSGLMR200000000100                         | sp Q13263 TIF1B_HUMAN |
| 4242 | CVSMPGDISGLQGGPR2000000000000000                  | sp Q8IY17 PLPL6_HUMAN |
| 4243 | GTEPSPGGTPQPSRPVSPAGPPEGVPEEAQPPR2.002E+32        | sp Q8WUZ0 BCL7C_HUMAN |
| 4244 | AEEKSPISINVK200000000                             | sp Q9UK58 CCNL1_HUMAN |
| 4245 | SVSGSPEPAAK202000000000                           | sp Q8IYB3 SRRM1_HUMAN |
| 4246 | ASSFSGISVLTR200000000000                          | sp Q15032 R3HD1_HUMAN |
| 4247 | HKSDNETNLQQQVVWGNR2000000000000000                | sp Q7Z401 MYCPP_HUMAN |
| 4248 | IKEEVLESEEAENQQAGAAALAPEIVIK2E+22                 | sp Q9UJX5 APC4_HUMAN  |
| 4249 | HSDNPSEEGEVKDDGLEK200020000000000000              | sp O14647 CHD2_HUMAN  |
| 4250 | ESVSTEDLSPPSPPLPK2000000                          | sp Q13127 REST_HUMAN  |
| 4251 | SQASMVINSDDTDEEEVSAALTLAHLK2.1000002E+24          | sp Q14676 MDC1_HUMAN  |
| 4252 | LVGATATSSPPPK200000                               | sp Q96QD9 UIF_HUMAN   |
| 4253 | GQSQLSNPTDDSWK2000000000                          | sp Q9Y6D5 BIG2_HUMAN  |
| 4254 | DLHSDNNEESDEVEDNDNDEMERPVNR2.0000002E+26          | sp P42568 AF9_HUMAN   |
| 4255 | RGSVSSVSPKPPSSFK2000020000000000                  | sp Q9NZJ0 DTL_HUMAN   |
| 4256 | SPEPEVLSTQEDLFDQSNK200000000000                   | sp Q12888 TP53B_HUMAN |
| 4257 | RESESEDETPPAAPQLIK202000000000000000              | sp O60832 DKC1_HUMAN  |
| 4258 | SIKSDVPVYLK200200000000                           | sp Q5SW79 CE170_HUMAN |
| 4259 | ELVGDGTSQEGDHEPSGSETEEDTSSSPHR2020000000000       | sp PODJ93 SIM13_HUMAN |
| 4260 | EENIKDSSGQEDETQSSNDPSQSVASQDAQEIRPR2.00000202E+30 | sp Q8N108 MIER1_HUMAN |
| 4261 | VLDTSSLTQSAPASPTNK2000000000000000                | sp Q8N122 RPTOR_HUMAN |
| 4262 | SHSPSPDPDTPSPVGDSR200000000000000000              | sp Q13586 STIM1_HUMAN |
| 4263 | KSSEGGVGVGGGDEPPTS2E+21                           | sp Q9Y4H2 IRS2_HUMAN  |
| 4264 | LSPEVAPPAHR20000000000                            | sp Q8TAD8 SNIP1_HUMAN |
| 4265 | DLSPQHMVVR200000000                               | sp P49590 SYHM_HUMAN  |
| 4266 | GPSPAPAPAASPQPSR2000000000000000                  | sp Q8IX07 FOG1_HUMAN  |
| 4267 | TPVDESDEIQHDEIPTGK2E+19                           | sp Q86TC9 MYPN_HUMAN  |
| 4268 | GPSSPPTTAPMR20000000000                           | sp Q9NXL9 MCM9_HUMAN  |
| 4269 | GLLSDSMTDVPVDTGVAAR2100000000000000               | sp O43399 TPD54_HUMAN |
| 4270 | HQDGLPYIDDSPPSSPHLSSK220000000                    | sp P11274 BCR_HUMAN   |
| 4271 | SASWGSTDLK2000000000                              | sp Q6P1L5 F117B_HUMAN |
| 4272 | SWDSSSPVDRPEPEAASPTTR2E+21                        | sp Q86WB0 NIPA_HUMAN  |

|      |                                                   |                       |
|------|---------------------------------------------------|-----------------------|
| 4273 | IGEGTYGVVYK3000000                                | sp Q00526 CDK3_HUMAN  |
|      |                                                   | sp P06493 CDK1_HUMAN  |
|      |                                                   | sp P24941 CDK2_HUMAN  |
| 4274 | SVSVDSGEQR200000000                               | sp Q86UU0 BCL9L_HUMAN |
| 4275 | EVSDDEAEEK200000000                               | sp P07900 HS90A_HUMAN |
| 4276 | ENQEPLRSPEVGDDEALRPLTK20000000000000000000        | sp P48681 NEST_HUMAN  |
| 4277 | SSSVTTSETQPCTPSSSDYSDLQR2E+22                     | sp P50552 VASP_HUMAN  |
| 4278 | GSPATSPHLGR20000000000                            | sp Q13671 RIN1_HUMAN  |
| 4279 | TRLSTASEETVQNR220000000000                        | sp O43379 WDR62_HUMAN |
| 4280 | MAEESSSSSSSSPTAATSQQQLK2E+20                      | sp Q13620 CUL4B_HUMAN |
| 4281 | GFGFGQGAGALVHSE200                                | sp P21291 CSRP1_HUMAN |
| 4282 | AEQSPPNDSGQDAHPDPDANPDAAR2.0002E+23               | sp Q9BUA3 CK084_HUMAN |
| 4283 | KA AVLSDSEDEEK202000000                           | sp Q96ST2 IWS1_HUMAN  |
| 4284 | VSSPAPMEGEEEEELLGPK20000000000000000000           | sp O14497 ARI1A_HUMAN |
| 4285 | DVDDGSGSPHSPHLSSK202002000000000                  | sp Q9H4A3 WNK1_HUMAN  |
| 4286 | SPTPPSSAGLGSNSAPPIDSR200002020000000000           | sp Q8IWX8 CHERP_HUMAN |
| 4287 | HVTLPSSPR20002000                                 | sp Q5T4S7 UBR4_HUMAN  |
|      |                                                   | sp P24941 CDK2_HUMAN  |
| 4288 | IGEGTYGVVYK3000000                                | sp P06493 CDK1_HUMAN  |
|      |                                                   | sp Q00526 CDK3_HUMAN  |
| 4289 | LSTTPSPTSSLHEDGVEDFR2.00000022E+19                | sp O94842 TOX4_HUMAN  |
| 4290 | DPHSPEDDEEQPQGLSDDDILR20000000000020000000        | sp Q86VM9 ZCH18_HUMAN |
| 4291 | KRPSLPSSPSPGLPK22000000000                        | sp O43294 TGF11_HUMAN |
| 4292 | HIVSNDSDDDESHEPK202000000000                      | sp P47712 PA24A_HUMAN |
| 4293 | ESLSTHTSPSQSPNSVHGSR202000000000000               | sp Q9H1K0 RBNS5_HUMAN |
| 4294 | SSSLLASPGHISVK220000000000000                     | sp A0FGR8 ESYT2_HUMAN |
| 4295 | GLFQDEDCSDCSYR200000000                           | sp Q8NEM2 SHCBP_HUMAN |
| 4296 | MLPHAPGVQMAIPEDAVHEDSGDEDGEDPDKR1.000000001E+33   | sp Q92769 HDAC2_HUMAN |
| 4297 | LGSQHSPGR20000                                    | sp Q8IZP0 ABI1_HUMAN  |
|      |                                                   | sp Q9UQ88 CD11A_HUMAN |
| 4298 | GTSRPPPEGGLGYSQLGDDDLK2.2E+21                     | sp P21127 CD11B_HUMAN |
|      |                                                   | sp P35659 DEK_HUMAN   |
| 4299 | KESEEDSSDDEPLIK2000022000000000                   | sp O60238 BNI3L_HUMAN |
| 4300 | DHSSQSEEEVVEGEK220200000000000                    | sp Q9NTI5 PDS5B_HUMAN |
| 4301 | LDSEMDSSENYDTMSSPLPGK20000300000000000            | sp Q6PIJ6 FBX38_HUMAN |
| 4302 | TVNSGGSSEPSPTVDVSR20020000000000                  | sp Q9C0B5 ZDHC5_HUMAN |
| 4303 | SSSLKSAQGTGFEGLQLQSIR2000200000000000000          | sp Q9Y4E1 FA21C_HUMAN |
| 4304 | GLFSDEEDSEDLFSSQSASNLK2000000000000000            | sp P49756 RBM25_HUMAN |
| 4305 | LGASNSPGQPNVSVKR20000020000                       | sp Q3YEC7 RABL6_HUMAN |
| 4306 | GSPPLPAGVPVSDITLSSEEEAEVAAPTK2.00000000020002E+29 | sp P00558 PGK1_HUMAN  |
| 4307 | ALESPERPFLAILGGAK2000000000000000                 | sp Q9BRD0 BUD13_HUMAN |
| 4308 | YEYDPDISPPR20000                                  | sp Q9P1Y6 PHRF1_HUMAN |
| 4309 | AEAPSSPDVAPAGK200000000000                        | sp Q92805 GOGA1_HUMAN |
| 4310 | SVKESVASMADSGDDFASDGSSSR2E+21                     | sp Q9UQ35 SRRM2_HUMAN |
| 4311 | SGSSQELDVKPSASPQER20020000000000000000            | sp P24928 RPB1_HUMAN  |
| 4312 | YSPTSPTYSPVYTPSPK3000000000002000                 | sp Q8WWI1 LMO7_HUMAN  |
| 4313 | SHSPSASQSGQLR2000000000000000                     | sp Q9NR09 BIRC6_HUMAN |
| 4314 | SPATSPISSNSHR2000000000000000                     | sp Q9GZR1 SEN6_HUMAN  |
| 4315 | ESISPQPADSACSSPAPSTGK20020000000000               | sp Q6PKG0 LARP1_HUMAN |
| 4316 | TASISSPSEGTPVGSYGCTPQSLPK2.202E+22                | sp Q13247 SRSF6_HUMAN |
| 4317 | SVSPPPKR202000000                                 | sp Q14202 ZMYM3_HUMAN |
| 4318 | GWAPPGPSSSGALDLLDTPAGLEK20000000000000000000      | sp Q6Y7W6 PERQ2_HUMAN |
| 4319 | ALSSGGSITSPPLSPALPK20000000002000000              | sp P27816 MAP4_HUMAN  |
| 4320 | DMSPLSETEMALGK20020000000000                      | sp O60832 DKC1_HUMAN  |
| 4321 | AGLESGAEPGDGSDTTK2000000000000000                 |                       |

|      |                                                    |                       |
|------|----------------------------------------------------|-----------------------|
| 4322 | SQSSGSSATHPI SVPGAR200000000000                    | sp Q9Y4H2 IRS2_HUMAN  |
| 4323 | IQSSLSVNSDISK200                                   | sp Q9P1T7 MDFIC_HUMAN |
| 4324 | DGSDYDPYDFSDTEEMPQVHTPK2E+21                       | sp P25205 MCM3_HUMAN  |
| 4325 | GFNGCDSPEPDGSDSLEQSPILLEDK2. 00000002E+19          | sp Q14814 MEF2D_HUMAN |
| 4326 | SSTPLHSPSPIR20002000000                            | sp 095817 BAG3_HUMAN  |
| 4327 | ESSEPPAPASSPEAASPTEQGPAGTSK2200002000000000000     | sp Q92766 RREB1_HUMAN |
| 4328 | KQDSSDEDDDDDEAPK22000000000000                     | sp 014647 CHD2_HUMAN  |
| 4329 | SRSSSPVTELASR202000000000                          | sp Q9UQ35 SRRM2_HUMAN |
| 4330 | TVSSPPTSPRPGSAATVSASTSNIIPPR2. 2002E+26            | sp 076094 SRP72_HUMAN |
| 4331 | YSDGDGKSDDLVVDVSNEDPATPR200000000000002000         | sp Q04726 TLE3_HUMAN  |
| 4332 | SSSLGSYDDEQEDLTPAQLTR2E+19                         | sp 094988 FA13A_HUMAN |
| 4333 | SRDATPPVSPINMEDQER2000200020001000000              | sp P17275 JUNB_HUMAN  |
| 4334 | LDSQPQETSPELPR2000000                              | sp 014545 TRAD1_HUMAN |
| 4335 | GPSPAPASSPKR20000020000                            | sp Q9H7N4 SFR19_HUMAN |
| 4336 | GSDALSETSSVSHIEDLEK200220200000000                 | sp Q6P996 PDXD1_HUMAN |
| 4337 | SPPVQPHTPVTISLGTAPSLQNNQPVEFNHAINVYVK2E+37         | sp Q96ST3 SIN3A_HUMAN |
| 4338 | NEIIQSPISQVPSVEK200000020000                       | sp Q7Z3T8 ZFY16_HUMAN |
| 4339 | RASPPPPKR202000000                                 | sp Q8IYB3 SRRM1_HUMAN |
| 4340 | GDSVSDSGSDALR200000000000                          | sp Q53EL6 PDCD4_HUMAN |
| 4341 | AGDPGEMPQSPTGLGQPK1002000000000                    | sp Q9UIF9 BAZ2A_HUMAN |
| 4342 | FVVIQNEDLGPASPLDSTFYR2000000000                    | sp P04626 ERBB2_HUMAN |
| 4343 | SPLLAGGSPQPVVPAHK2000000200000000000               | sp Q8NFH5 NUP53_HUMAN |
| 4344 | SPSSLSANI ISSPK200000000002000                     | sp Q8NFA0 UBP32_HUMAN |
| 4345 | SRPTSEGSDIESTEPQK20020000000000                    | sp Q4G0J3 LARP7_HUMAN |
| 4346 | AGSNEDPILAPSGTTPPTIPPDEFGGR200000000000000000      | sp Q8IZL8 PELP1_HUMAN |
| 4347 | SPAVATSTAAPPPSSPLPSK2000000000000000               | sp Q14157 UBP2L_HUMAN |
| 4348 | RQSPEPSPVTLGR200020000000                          | sp Q9NRL2 BAZ1A_HUMAN |
| 4349 | RESESEDETPPAAPQLIK202020000000000000               | sp 060832 DKC1_HUMAN  |
| 4350 | SGDEMIFDPTMSK20000000000000                        | sp P20042 IF2B_HUMAN  |
| 4351 | TAQVSPPPR20000                                     | sp Q9UKV3 ACINU_HUMAN |
| 4352 | AWLDEDSNLSPSPLR20000                               | sp Q9C086 IN80B_HUMAN |
| 4353 | STGSATSLASQGER20000000000000                       | sp Q5SW79 CE170_HUMAN |
| 4354 | SRDSGDENEPIQER2002000000000000                     | sp Q8WX93 PALLD_HUMAN |
| 4355 | AAGGAPSPPPPVR20000000                              | sp Q4KMP7 TB10B_HUMAN |
| 4356 | SDPDGGDSPLPASGGPLTCK2E+20                          | sp Q8N1G0 ZN687_HUMAN |
| 4357 | FGDSSSDNGFSSTGSTPAKPTVEK2. 202E+22                 | sp Q8IU60 DCP2_HUMAN  |
| 4358 | STPSPVLQPR2020000000                               | sp Q8TEK3 DOT1L_HUMAN |
| 4359 | SGSSSPDSEITELK22000000000000                       | sp P17812 PYRG1_HUMAN |
| 4360 | SASWGSADQLK2000000000                              | sp Q86VQ1 GLC11_HUMAN |
| 4361 | SPSPYYSR202000000                                  | sp P62995 TRA2B_HUMAN |
| 4362 | QLSSGVSEIR20000000                                 | sp Q13595 TRA2A_HUMAN |
| 4363 | SEVQQPVHPKPLSPDSR200000                            | sp P04792 HSPB1_HUMAN |
| 4364 | AEEQQLPPPLSPPSPSTPNHR200200000000                  | sp Q9UHB6 LIMA1_HUMAN |
| 4365 | KLPSDSGDLEALEGK20000000000000                      | sp Q6WCQ1 MPRIP_HUMAN |
| 4366 | LGSVEAPK2000000                                    | sp 060524 NEMF_HUMAN  |
| 4367 | QQAAYYAQTSPQGMPPHPPAPQGQ2000000000000000           | sp P46087 NOP2_HUMAN  |
| 4368 | ENSFSGSPLEFR2002000000                             | sp Q96AE4 FUBP1_HUMAN |
| 4369 | RPDHSGGSPSPPTSEPAR2002000000000000                 | sp Q9UQ35 SRRM2_HUMAN |
| 4370 | GSSDGRGSDSEDLPHR2000000200000000                   | sp Q8TAD8 SNIP1_HUMAN |
| 4371 | DNSISPESDVTASTISLVTGETER2. 02002E+23               | sp Q9UPQ0 LIMC1_HUMAN |
| 4372 | EESDDEDEKESEEEPPKK22000000200000000                | sp Q5SW79 CE170_HUMAN |
| 4373 | ALSSGGSITSPPLSPALPK220000000000                    | sp P35659 DEK_HUMAN   |
| 4374 | EVEEDSEDEEMSEDEEDDSSGEEVVIPQK2. 00000200000022E+24 | sp Q6Y7W6 PERQ2_HUMAN |
|      |                                                    | sp P19338 NUCL_HUMAN  |

|      |                                               |                       |
|------|-----------------------------------------------|-----------------------|
| 4375 | STSSSDTMSTFKPMVAPR220000000000000000          | sp Q7Z6B7 SRGP1_HUMAN |
| 4376 | LDSSEMDHSENYDTMSSPLPGK2.0010020000001E+21     | sp Q9NTI5 PDS5B_HUMAN |
| 4377 | SPSSLSANI ISSPKGSPSSSR220002000000            | sp Q8NFA0 UBP32_HUMAN |
| 4378 | KPSVGVPPPASPSYPR2000000                       | sp Q9P206 K1522_HUMAN |
| 4379 | CQTAEADSESDHEVPEPESEM2020000000000000         | sp Q9BPX3 CND3_HUMAN  |
| 4380 | TAVQYIESSDSEEIETSELPQK30002020000000000000    | sp Q14527 HLTF_HUMAN  |
| 4381 | SSSVGSSSYPI SPAVSR22200020000000              | sp Q15149 PLEC_HUMAN  |
| 4382 | TDALTSSPGR2020000                             | sp P49736 MCM2_HUMAN  |
| 4383 | LLEDSEDEEAAPSPLQPALRPNPTAILDEAPKPK2.02E+31    | sp Q9BW85 CCD94_HUMAN |
| 4384 | APSTSPSFEGTQETYTVAHEENV20000000000000         | sp Q9BUT9 F195A_HUMAN |
| 4385 | EKEEEEEPEGKPSDAESSESDDEKAWVEEVR2.00022022E+20 | sp Q9BSC4 NOL10_HUMAN |
| 4386 | DATPPVSPINMEDQER200020001000000               | sp P17275 JUNB_HUMAN  |
| 4387 | HSVTGYGDCAVGAR2000000000000000                | sp Q96IF1 AJUBA_HUMAN |
| 4388 | GSPPLPAGVPVSDITLSSEEEAEVAAPTK2.0000000002E+29 | sp Q3YEC7 RABL6_HUMAN |
| 4389 | ISYTPPEPVPVSYASSTPLHVPVPR2.0002E+22           | sp P41212 ETV6_HUMAN  |
| 4390 | AGGSPAPGPETPAISPSK20000                       | sp P33316 DUT_HUMAN   |
| 4391 | GRDDPGQQTDSSEDEDIIGMPAK20220000000010000      | sp Q8IXQ4 GPAM1_HUMAN |
| 4392 | SSSPVTELASR200000000000                       | sp Q9UQ35 SRRM2_HUMAN |
| 4393 | RYPSSISSPQK20000                              | sp Q14157 UBP2L_HUMAN |
| 4394 | SGPKPFSAPKQTSPPSK202000                       | sp Q01518 CAP1_HUMAN  |
| 4395 | DSPSKSSAEAQTPEDTPNK200000000000000000         | sp 043493 TGON2_HUMAN |
| 4396 | TLSPTPSAEGYQDVR200000000000000000             | sp 014639 ABLM1_HUMAN |
| 4397 | AASPESASSTPESLQAR200202000000000000           | sp Q96BT3 CENPT_HUMAN |
| 4398 | TASGSSVTSLDGTR2022000000                      | sp Q92597 NDRG1_HUMAN |
| 4399 | SLVGTPTYWMAPELISR200000000000000000           | sp 096013 PAK4_HUMAN  |
| 4400 | TPLALAGSPTPK2000                              | sp 095785 WIZ_HUMAN   |
| 4401 | HPASDSEIEELQK20200000000                      | sp Q96ST2 IWS1_HUMAN  |
| 4402 | DTSPDKGELVSDEEEDT20000000                     | sp Q9UPU7 TBD2B_HUMAN |
| 4403 | AVPTWASVQVDDPGSLASVESPGTPK2000000             | sp Q8IVT2 MISP_HUMAN  |
| 4404 | LPQLVGVSTPLQGGNSAAAIGQSSGELR200000            | sp P15291 B4GT1_HUMAN |
| 4405 | LGGLRPESPELTSVSR200200000000                  | sp Q9H6F5 CCD86_HUMAN |
| 4406 | GRLTPSPDIIVLSDNEASSPR2020000000000020000      | sp Q8WXI9 P66B_HUMAN  |
| 4407 | GLAGPPASPGK20000                              | sp Q9P206 K1522_HUMAN |
| 4408 | TSDIFGSPVTATSR200000000                       | sp Q9H910 HN1L_HUMAN  |
| 4409 | SPAVATSTAAPPPSSPLPSK20000000                  | sp Q14157 UBP2L_HUMAN |
| 4410 | GPPSPAPVMHSPSR20000000000000                  | sp Q13573 SNW1_HUMAN  |
| 4411 | ATSPSSVSGDFDDGHHSVSTPGPSR2E+24                | sp Q86U86 PB1_HUMAN   |
| 4412 | SSGTASSVAFTPLQGLEIVNPQAAEK2.02E+25            | sp Q8WWY3 PRP31_HUMAN |
| 4413 | RGSLPDTQPSQGPSTPK2000000000000000             | sp Q86Y91 KI18B_HUMAN |
| 4414 | LSSPVLHR2000000                               | sp Q16643 DREB_HUMAN  |
| 4415 | IYQYIQR300000                                 | sp Q9Y463 DYR1B_HUMAN |
| 4416 | QSLSSADNLESDAQGHQVAAR200000000000000000       | sp Q13627 DYR1A_HUMAN |
| 4417 | KPSGSPDLWK2000000                             | sp Q9Y6D5 BIG2_HUMAN  |
| 4418 | AAEMHQLKDSSR2000                              | sp Q96JM3 CHAP1_HUMAN |
| 4419 | KGGSYSQAASSDSAQGSVSLTACK2002000000            | sp Q96BD0 SO4A1_HUMAN |
|      |                                               | sp P05534 1A24_HUMAN  |
|      |                                               | sp Q09160 1A80_HUMAN  |
|      |                                               | sp P30447 1A23_HUMAN  |
|      |                                               | sp P01891 1A68_HUMAN  |
|      |                                               | sp P01892 1A02_HUMAN  |
|      |                                               | sp P10316 1A69_HUMAN  |
| 4420 | DSSSTDSANEKPALIPR200200000000000000           | sp Q9NUQ6 SPS2L_HUMAN |
| 4421 | GLPSPYNMSSAPGSR20000200                       | sp P15924 DESP_HUMAN  |
| 4422 | LSPQDPRPLSPGALQLAGEK2.00000002E+19            | sp Q8TEK3 DOT1L_HUMAN |

|      |                                                 |                       |
|------|-------------------------------------------------|-----------------------|
| 4423 | SLPGPAPCLK20000000000                           | sp Q01433 AMPD2_HUMAN |
| 4424 | LIPGPLSPVAR200000                               | sp P48634 PRC2A_HUMAN |
| 4425 | SPGSPVCR200200000                               | sp Q86VQ1 GLC11_HUMAN |
| 4426 | SPSEESAPTTSPESVSGVPSSGSSGR2000000000000         | sp P54725 RD23A_HUMAN |
| 4427 | HASSSPESPKPAPAPGSHR22002000000000000            | sp Q9UQ35 SRRM2_HUMAN |
| 4428 | HSVTAATPPPSPTSGESGDLLSNLQSPSSAK2. 2E+20         | sp Q96QU8 XPO6_HUMAN  |
| 4429 | VETVSQPSESPKDTIDK20000200000000000              | sp Q99590 SCAFB_HUMAN |
| 4430 | FNSYDISR2000000                                 | sp Q6IQ26 DEN5A_HUMAN |
| 4431 | QASPETSASPDGSQNLVYETELLR20000000000000000       | sp Q14789 G0GB1_HUMAN |
| 4432 | QRGSETGSETHESDLAPSDK20200000000000000           | sp P48634 PRC2A_HUMAN |
| 4433 | AAAPPQSPPPPTK2000000                            | sp P49848 TAF6_HUMAN  |
| 4434 | GAASPVLQEDHCDLPSVLQVEEK2E+21                    | sp Q8N9B5 JMY_HUMAN   |
| 4435 | GTEPSPGGTPQPSRPVPAGPPEGVPEEAQPPR2. 00000002E+25 | sp Q8WUZ0 BCL7C_HUMAN |
| 4436 | NLVSPAYCTQESR200                                | sp Q9NUQ3 TXLNG_HUMAN |
| 4437 | TEQELPRPQSPSDLSDLGR200000200000                 | sp P54259 ATN1_HUMAN  |
| 4438 | TGVTSTSDSEEGDDQEGEKK20200000000000000           | sp 075475 PSIP1_HUMAN |
| 4439 | QEPIESDEEEAEPPR20000000000                      | sp P56524 HDAC4_HUMAN |
| 4440 | RGSPVPPVPER2000000000                           | sp Q6ZRV2 FA83H_HUMAN |
| 4441 | QNSQLPAQVQNGPSQEELEIQR2E+20                     | sp Q8N8S7 ENAH_HUMAN  |
| 4442 | VTETEDSDSDSDDEDDVHVTIGDIK2. 0202E+20            | sp Q6UN15 FIP1_HUMAN  |
| 4443 | DDEKEAEEGEDDRDSANGEDDS200000000                 | sp P07910 HNRPC_HUMAN |
| 4444 | APSDSSLGTPSDGRPELR20000000000000000             | sp Q15642 CIP4_HUMAN  |
| 4445 | DLFDLNSSEEDDTEGFSEK200000000000000              | sp Q9Y3T9 NOC2L_HUMAN |
| 4446 | SPTLSQVHSPLVTSANLK20002000000000                | sp Q86UU0 BCL9L_HUMAN |
| 4447 | SLHGFEFSASDSSLTDIQETR2022000000000              | sp 043166 SIL1_HUMAN  |
| 4448 | SSTPLPTISSAENTR220000000                        | sp P42166 LAP2A_HUMAN |
| 4449 | LKEDIENEDEQNSPPK20000                           | sp P42167 LAP2B_HUMAN |
| 4450 | SPGSTPTTSSQAPQK202200000000000                  | sp Q9NTI5 PDS5B_HUMAN |
| 4451 | VPVQEIDDDFFPSSGEEAEASVGEVGGGGGRK2. 2E+20        | sp P35658 NU214_HUMAN |
| 4452 | EGEETVYSDEEEKDESAR20000000000000000             | sp Q03468 ERCC6_HUMAN |
| 4453 | EPAPLLSAQYETLSDSDD202000                        | sp 000264 PGRC1_HUMAN |
| 4454 | NAIASDSEADSDTEVVK200000200000000                | sp 075376 NCOR1_HUMAN |
| 4455 | LEEPINEETPSQDEEEGVSDVESER2000000020002000       | sp Q8WVC0 LEO1_HUMAN  |
| 4456 | SSSPILTKPTLK220000000000000                     | sp Q9BYW2 SETD2_HUMAN |
| 4457 | LTSVSSVDFDQR22200000000                         | sp Q92794 KAT6A_HUMAN |
| 4458 | SAASPVSSMPER200000000000                        | sp Q5T3F8 CSCL2_HUMAN |
| 4459 | GPPSPAPVMHSPSR2000001020000                     | sp P18583 SON_HUMAN   |
| 4460 | ESSTESSQSAKPVSGQDTSGNTEGSPAEEK2000000           | sp Q13573 SNW1_HUMAN  |
| 4461 | ESKDKPEIEDVGSDEEEK20000000                      | sp Q96S66 CLCC1_HUMAN |
| 4462 | FLETDSEEEQEEVNEKK20200000000000000              | sp Q14568 HS902_HUMAN |
| 4463 | SFNYSNPSSTSEVSSTSASK200000000000                | sp Q76FK4 NOL8_HUMAN  |
| 4464 | GRLTPSPDIVLSDNEASSPR2000000000000000000         | sp Q5VT52 RPRD2_HUMAN |
| 4465 | SRSPLDKDTYPPSASVVGASVGGHR2. 0000000002E+23      | sp Q8WXI9 P66B_HUMAN  |
| 4466 | YTPTSPSYSPSPEYTPSPK2. 000003E+20                | sp Q96T37 RBM15_HUMAN |
| 4467 | GAAEEEQQDSGSEPRGEDDIPLGPQSNVSLLDQHHLK2. 02E+30  | sp P24928 RPB1_HUMAN  |
| 4468 | DAPAGSPASPQGPSTK20002000000000000               | sp Q9UJV9 DDX41_HUMAN |
| 4469 | VVEAVNSDSDSEFGIPKK20202000000000                | sp Q3MIN7 RGL3_HUMAN  |
| 4470 | AADSSPDTSDNEAKEEIK22002200000000000             | sp Q02880 TOP2B_HUMAN |
| 4471 | AASPSQSVR202000000                              | sp Q9NYD6 HXC10_HUMAN |
| 4472 | SVENLPECGITHEQR20000000000000000                | sp Q8IYB3 SRRM1_HUMAN |
| 4473 | SGFGEISSPVIR200000                              | sp Q9UBF8 PI4KB_HUMAN |
| 4474 | EPVNLEGDDTSLIHGK2000000                         | sp P57740 NU107_HUMAN |
| 4475 | AGSNEDPILAPSGTTPPTIPPDETFGGR20000000000000000   | sp Q9H2J7 S6A15_HUMAN |
|      |                                                 | sp Q8IZL8 PELP1_HUMAN |

|      |                                                     |                       |
|------|-----------------------------------------------------|-----------------------|
| 4476 | RGEGDAPFSEPGTTSTQRPSSPETATK20000000                 | sp Q9UQ35 SRRM2_HUMAN |
| 4477 | DAAAHLQTSBKPSAEDAEGQSPLSQK2000000                   | sp Q96F24 NRBF2_HUMAN |
| 4478 | SRSRSTPPSSAGLGSNSAPPIDSR2. 0202E+26                 | sp Q8IWX8 CHERP_HUMAN |
| 4479 | KRSPSPSPTPEAK2000000000                             | sp Q8TAQ2 SMRC2_HUMAN |
| 4480 | EAARSPDKPGGSPSASR20000000000000                     | sp Q9Y3T9 NOC2L_HUMAN |
| 4481 | TPQGPSPTNTPLPEAAVSQPGSAVASDWR2E+26                  | sp Q9Y4R8 TELO2_HUMAN |
| 4482 | SAPASPTHPLMSPR2000000000002000                      | sp P85037 FOXK1_HUMAN |
| 4483 | LNQSSPDNVTDTK2000000000                             | sp Q08AD1 CAMP2_HUMAN |
| 4484 | SGDETPGSEVPGDK200200000000                          | sp Q1KMD3 HNRL2_HUMAN |
| 4485 | EFITGDVEPTDAESEWHSENEEEEEK200000000                 | sp Q99733 NP1L4_HUMAN |
| 4486 | KPGDGEVSPSTEDAPFQHSPLGK20000000000000               | sp 060318 GANP_HUMAN  |
| 4487 | SEPVINNDNPLESNDEK200000                             | sp P23497 SP100_HUMAN |
| 4488 | TTAPTEGKSPLKK200000                                 | sp Q96T37 RBM15_HUMAN |
| 4489 | VSPAPGSAPEPTPEDK2000200000                          | sp Q13459 MYO9B_HUMAN |
| 4490 | AKSPTPDGSER2020000000                               | sp Q96MU7 YTDC1_HUMAN |
| 4491 | GEAERGGSSGDELREDDEPVK200220000000000000             | sp Q7Z4V5 HDGR2_HUMAN |
| 4492 | SMSPTSTPK2020000000                                 | sp 094913 PCF11_HUMAN |
| 4493 | GSFSDTGLGDGK2000000000                              | sp Q9Y2W1 TR150_HUMAN |
| 4494 | HGSVSADEAAR2000000000                               | sp Q9NWW5 CLN6_HUMAN  |
| 4495 | HSHSHSPMSTR20202000000                              | sp P62995 TRA2B_HUMAN |
| 4496 | SSTPLPTISSAENTR20000000000                          | sp P42167 LAP2B_HUMAN |
| 4497 | TLSNAEDYLDDESD200                                   | sp P42166 LAP2A_HUMAN |
| 4498 | KRPSLPSSPSPGLPK2000200000000                        | sp Q92882 OSTF1_HUMAN |
| 4499 | YLVDTGKPNAGSEEISSEDELVEEKK200022000000000000        | sp 043294 TGF11_HUMAN |
| 4500 | AASSSPGSPVASSPSR200                                 | sp Q9NY61 AATF_HUMAN  |
| 4501 | SSSFTPFIDPR22000000000                              | sp Q92538 GBF1_HUMAN  |
| 4502 | LPPTFFCGVCSDTDEDNGNGEDFQSELQK200000000000000000     | sp 095819 M4K4_HUMAN  |
| 4503 | LGFVDVQNCISR200                                     | sp P49792 RBP2_HUMAN  |
| 4504 | SRSSSPVTELASR22000000000                            | sp Q14573 ITPR3_HUMAN |
| 4505 | SGLELTELQNMTPEDDNISNDSNDFTEVENGQINSK2. 00000002E+26 | sp Q9UQ35 SRRM2_HUMAN |
| 4506 | SEPSGEINIDSSGETVGSGER220000000000                   | sp Q9H2H9 S38A1_HUMAN |
| 4507 | GGSYVFQSDGPEPEAEESDLDSGSVHSASGRPDGPVR2E+20          | sp P42695 CNDD3_HUMAN |
| 4508 | SALSPSKSPAK200020000                                | sp Q12873 CHD3_HUMAN  |
| 4509 | SFTLDESLSK200000000                                 | sp P49792 RBP2_HUMAN  |
| 4510 | AGMSSNQSISSPVLDVAVPR2002022000000000                | sp Q7Z3J3 RGPD4_HUMAN |
| 4511 | TIASDSEEEAGK2020000000                              | sp Q86WR7 PRSR2_HUMAN |
| 4512 | SPPAPGLQPMR200000000000                             | sp Q9UQ35 SRRM2_HUMAN |
| 4513 | SNSPLPSIQLQPQSPSASK2000000                          | sp Q96ST2 IWS1_HUMAN  |
| 4514 | EAASSSGTQPAPPAPASPWDK2000000                        | sp P15408 FOSL2_HUMAN |
| 4515 | GFEEHKDSDDDSSDDEQEKKPEAPK20000200000000000000       | sp Q08174 PCDH1_HUMAN |
| 4516 | ISSSFSR20000                                        | sp Q9H7N4 SFR19_HUMAN |
| 4517 | GSVSPSTPSPPKPTGIFQTSANSSFEVPK2. 002E+27             | sp Q13435 SF3B2_HUMAN |
| 4518 | FPTYASTSEDEFSGSNR222000000000                       | sp P05787 K2C8_HUMAN  |
| 4519 | VGVSSKPDSSPVLSPGNK20000200000                       | sp 015027 SC16A_HUMAN |
| 4520 | SNSAPLIHGLSDTSPVFQAEAPSAR20000000000000             | sp Q5SW79 CE170_HUMAN |
| 4521 | KRPACPEPGESESSSDEGCTVVRPEK202220000000000000        | sp Q8N4C8 MINK1_HUMAN |
| 4522 | RPDHSGGSPSPPTSEPAR2000020000000000                  | sp Q96E09 F122A_HUMAN |
| 4523 | QPSSPSHNTNLR2000000000                              | sp 015541 R113A_HUMAN |
| 4524 | SPAVATSTAAPPPSSPLPSK2E+21                           | sp Q8TAD8 SNIP1_HUMAN |
| 4525 | SLTNSHLEK20000000                                   | sp Q9UIF9 BAZ2A_HUMAN |
| 4526 | DAEPQGPSAAESLEEDAAAGLSSTK2E+20                      | sp Q14157 UBP2L_HUMAN |
| 4527 | TPTAPAVNLAGAR200000000000                           | sp Q9H2H9 S38A1_HUMAN |
|      |                                                     | sp Q9H9J4 UBP42_HUMAN |
|      |                                                     | sp Q9UQ35 SRRM2_HUMAN |

|      |                                              |                       |
|------|----------------------------------------------|-----------------------|
| 4528 | HKSDNETNLQQVVGWNR200000000000                | sp Q7Z401 MYCPP_HUMAN |
| 4529 | ASPPQGPLPGPPGALHR2000000000000000            | sp Q96G74 OTUD5_HUMAN |
| 4530 | QDPVTYISETDEEDDFMCK2020000001000             | sp P35251 RFC1_HUMAN  |
| 4531 | TRSVEDDEEGHLICQSGDVLSAR2.02E+23              | sp P49759 CLK1_HUMAN  |
| 4532 | SIVECQPDASATPGVGTADSPAAPTDSR2000000000       | sp Q7Z2Z1 TICRR_HUMAN |
| 4533 | SSSQPSSCCSDPSKPGNVEGATQSLAEQMR2E+29          | sp Q13501 SQSTM_HUMAN |
| 4534 | SIDTQTPSVQER20000000000000                   | sp Q86VQ1 GLC11_HUMAN |
| 4535 | SKSDGEAKPEPSPSPR2000000000000000             | sp P26358 DNMT1_HUMAN |
| 4536 | ETSAATLSPGASSR20000000                       | sp Q9Y6I9 TX264_HUMAN |
| 4537 | AKTQTPPVSPAPQPTTEER2000200000000000          | sp Q14247 SRC8_HUMAN  |
| 4538 | KPSPQPSSPR200002000                          | sp 075909 CCNK_HUMAN  |
| 4539 | SGMSPEQSR2000000                             | sp Q9UQ35 SRRM2_HUMAN |
| 4540 | NSPNNISGISNPPGTPR2000                        | sp Q9BWW4 SSBP3_HUMAN |
| 4541 | LRLSPSPTSQR200000000                         | sp P02545 LMNA_HUMAN  |
| 4542 | AWLDEDSNLSPSPLR2002020000                    | sp Q9C086 IN80B_HUMAN |
| 4543 | SHSPSASQSGSQLR200000000                      | sp Q8WWI1 LM07_HUMAN  |
| 4544 | EVDDILGEGSDSDSEK200200000                    | sp Q9Y5B0 CTDP1_HUMAN |
| 4545 | NSSTETDQQPHSPDSSSVHSIR20000000000000         | sp Q92613 JADE3_HUMAN |
| 4546 | EIQGNLHESDSESVPR202000000                    | sp Q86UP2 KTN1_HUMAN  |
| 4547 | LDEDDSCSLTK20200000                          | sp Q9HAW4 CLSPN_HUMAN |
| 4548 | QPEYSPESPR2000                               | sp Q9H6F5 CCD86_HUMAN |
| 4549 | GKGSRPQAPK200000000                          | sp Q14978 NOLC1_HUMAN |
| 4550 | ATSSSSGSLSATGR20000000000000                 | sp Q03252 LMNB2_HUMAN |
| 4551 | TDSVIIADQTPPTR20000000020000                 | sp P17544 ATF7_HUMAN  |
| 4552 | ETIELSPTGRPK20000000                         | sp Q9NRZ9 HELLS_HUMAN |
| 4553 | NHSGSRTPPVALNSSR2000200000000000             | sp Q9UQ35 SRRM2_HUMAN |
| 4554 | ALSSGGSITSPPLSPALPK200000020002000000        | sp Q6Y7W6 PERQ2_HUMAN |
| 4555 | TVIIIEQSWGSPK2000                            | sp P10809 CH60_HUMAN  |
| 4556 | EAEDSDSDDNIKR20000000000                     | sp Q96ST2 IWS1_HUMAN  |
| 4557 | RPASPSSPEHLPATPAESPAQR2.02E+19               | sp Q9H7L9 SDS3_HUMAN  |
| 4558 | SDSGSSSEPFDR20000200000000                   | sp P48634 PRC2A_HUMAN |
| 4559 | GPRTPSPPPPYPEDIALGK2020000000000000          | sp Q5T200 ZC3HD_HUMAN |
| 4560 | KRSSSEDAESLAPR220000000000                   | sp Q4G0J3 LARP7_HUMAN |
| 4561 | LEKPETQSSPITVQSSK2000000000                  | sp Q96CB8 INT12_HUMAN |
| 4562 | KSSADTEFSDECTTAER2000000000000000            | sp Q9H6S0 YTDC2_HUMAN |
| 4563 | ECELSPGVNR2000000                            | sp Q9BXP5 SRRT_HUMAN  |
| 4564 | VGSPLTLTDAQTR2000000000000                   | sp Q99569 PKP4_HUMAN  |
| 4565 | DPSSGQEVATPPVQLQVCEPK20000000000000          | sp Q9UKV3 ACINU_HUMAN |
| 4566 | MNSTGGQTPR200000000                          | sp Q96ST2 IWS1_HUMAN  |
| 4567 | GYSPYSVSGSGSTAGSR30000000002000000           | sp Q15149 PLEC_HUMAN  |
| 4568 | LASPMKVPPTSSK201000002000000                 | sp Q15648 MED1_HUMAN  |
| 4569 | VVDYSQFQESDDADEDYGRDSGPPTK200000000002000000 | sp Q9H1E3 NUCKS_HUMAN |
| 4570 | SPISVPGGSALISNLGK200000000000000000          | sp P51610 HCFC1_HUMAN |
| 4571 | RPAEATSSPTSPERPR2000000                      | sp Q9BU76 MMTA2_HUMAN |
| 4572 | RNSVERPAEPVAGAATPSLVEQQK2E+22                | sp Q9BTC0 DIDO1_HUMAN |
| 4573 | SPLELEPEAK20000000000                        | sp Q92466 DDB2_HUMAN  |
|      |                                              | sp P05534 1A24_HUMAN  |
|      |                                              | sp P30447 1A23_HUMAN  |
| 4574 | GGSYSQAASSDSAQGSVSLTACK2000000000000000      | sp P01891 1A68_HUMAN  |
|      |                                              | sp P01892 1A02_HUMAN  |
|      |                                              | sp Q09160 1A80_HUMAN  |
|      |                                              | sp P10316 1A69_HUMAN  |
| 4575 | ENSGSPLEFR2000000000                         | sp Q9UQ35 SRRM2_HUMAN |
| 4576 | QSVVYGGKSTIR22000                            | sp Q8WWY3 PRP31_HUMAN |



|      |                                                      |                       |
|------|------------------------------------------------------|-----------------------|
| 4577 | SGGVTEASSLLGGSPR2000                                 | sp Q92729 PTPRU_HUMAN |
| 4578 | SAYQEYSDSDVPEELKR2000000000                          | sp Q96JG6 CC132_HUMAN |
| 4579 | EVEEDSEDEEMSEDEEDDSSGEEVVIPQK2.00001000000022E+24    | sp P19338 NUCL_HUMAN  |
| 4580 | EVYELLDSPGK20000                                     | sp P22234 PUR6_HUMAN  |
| 4581 | VGEDEDGSDEEVVHNEDIHFEPVIVSLPEVEVK2E+25               | sp P49792 RBP2_HUMAN  |
| 4582 | SSVGPSPKPVSPQR2000000000000                          | sp Q9Y657 SPIN1_HUMAN |
| 4583 | SSTPSPSPLNLSSSR22000000000000                        | sp P37275 ZEB1_HUMAN  |
| 4584 | NSSSPVPASVPGQR2020020000000000                       | sp Q9H1B7 I2BPL_HUMAN |
| 4585 | GSSPGIQDTLEAEDGAFETDEAPEDR2E+24                      | sp Q9UNX4 WDR3_HUMAN  |
| 4586 | VENMDISDEEEGGAPPPGSPQVLEEDEAELELQK1.002E+31          | sp O43290 SNUT1_HUMAN |
| 4587 | HEHPNPPVSPGK20000                                    | sp Q6VMQ6 MCAF1_HUMAN |
| 4588 | ESKEETSIDVAGKPNEVTK20000000000000                    | sp P53985 MOT1_HUMAN  |
| 4589 | STPLASPSPPGR200020000                                | sp Q8WYP5 ELYS_HUMAN  |
| 4590 | FTDKDQPSGSEGEDDDAEALKK2000000000000000               | sp Q9NXG2 THUM1_HUMAN |
| 4591 | QFTSSSIKSSGLGGSSR22000000000000000000                | sp Q04695 K1C17_HUMAN |
| 4592 | IFDEVMGCFSDSPPQSPTFPEAGHTSLYDEDKVPR1.0002000002E+30  | sp Q13085 ACACA_HUMAN |
| 4593 | LAAQLGAPTSPIPDSAIVNTR2000000000000000                | sp Q9H8Y5 ANKZ1_HUMAN |
| 4594 | DHSPTPSVFNSDEER20002000200000                        | sp Q6UN15 FIP1_HUMAN  |
| 4595 | DSSTSYTETKDPSSGQEVATPPVPQLQVCEPK2.2E+20              | sp Q9UKV3 ACINU_HUMAN |
| 4596 | KVDYDYSQFQESDDAEDYGR2000000000000000                 | sp Q9H1E3 NUCKS_HUMAN |
| 4597 | IEEQELSENTSLPAEEANGSLSEEEANGPELGSGK2.00000000202E+25 | sp Q9BUR4 WAP53_HUMAN |
| 4598 | TSPADHGGVSGSESGSAVDSVAGEHSVSGR2000000000000000       | sp Q5T4S7 UBR4_HUMAN  |
| 4599 | HLFSSTENLAAGSWK20000000000000                        | sp Q6WKZ4 RFIP1_HUMAN |
| 4600 | HSTPSNNSNSGPPSPNSPHR200020000000                     | sp Q9Y5S2 MRCKB_HUMAN |
| 4601 | GADNDGSGSESGYTPK200000000000                         | sp Q7Z417 NUFP2_HUMAN |
| 4602 | SPVSPGSSPQLQVK20000000                               | sp Q8N3F8 MILK1_HUMAN |
| 4603 | SPGTSPLLSR20002000000                                | sp Q9BRS8 LARP6_HUMAN |
| 4604 | TPPAPSPFDLPELK2000000000000000                       | sp O95239 KIF4A_HUMAN |
| 4605 | ESLSTHTSPSQSPNSVHGSR202000000000                     | sp Q9H1K0 RBNS5_HUMAN |
| 4606 | DDSHAEDSEDEKEDHK20002000000000                       | sp Q9H1E3 NUCKS_HUMAN |
| 4607 | QLSALSSDGEQGGRPVPR200200000000000000                 | sp O15438 MRP3_HUMAN  |
| 4608 | HQSDKNPGSSNLQK20000000000000                         | sp Q12986 NFX1_HUMAN  |
| 4609 | TASRPDDIPDSPSSPK2000                                 | sp Q5VZK9 LR16A_HUMAN |
| 4610 | EALLQASR200                                          | sp P26038 MOES_HUMAN  |
| 4611 | ESISQPADSACSSPAPSTGK20000020000000000000             | sp Q9GZR1 SENP6_HUMAN |
| 4612 | SAADSISESVPVGPK200000000000                          | sp P45974 UBP5_HUMAN  |
| 4613 | NTPSQHSHSIQHSPER200020000                            | sp Q9NYF8 BCLF1_HUMAN |
| 4614 | SRSTTAHSWQR202000000000                              | sp Q9UKJ3 GPTC8_HUMAN |
| 4615 | SELSNCSIGK2000000000                                 | sp Q92625 ANS1A_HUMAN |
| 4616 | RLSPSASPPR202020000                                  | sp Q8IYB3 SRRM1_HUMAN |
| 4617 | ELSNSPLRENSFGSPLEFR2000000002000000                  | sp Q9UQ35 SRRM2_HUMAN |
| 4618 | GSSLSGTDGAQEVVK2000000000000000                      | sp Q9Y6D5 BIG2_HUMAN  |
| 4619 | SQDQDSEVNELSR200000200                               | sp Q86VM9 ZCH18_HUMAN |
| 4620 | RLSSASTGKPPLSVEDDFEK20002000000000000000             | sp O75152 ZC11A_HUMAN |
| 4621 | RGFSDSGGPPAK20000000000                              | sp Q9H307 PININ_HUMAN |
| 4622 | RSSLSSHSHQSQIYR2200000000000000                      | sp O15027 SC16A_HUMAN |
| 4623 | NHLLQFALESPAKSPASSSSK20002000000000                  | sp Q9NS91 RAD18_HUMAN |
| 4624 | AKSPQPPVEEEDHFDDTVVCLDTYNCDLHFK2000000000000000      | sp Q00839 HNRPU_HUMAN |
| 4625 | SRTPPSAPSQR20200000000000                            | sp Q9UQ35 SRRM2_HUMAN |
| 4626 | SPAVATSTAAPPPSSPLPSK2000000000000000                 | sp Q14157 UBP2L_HUMAN |
| 4627 | GFEEEHKSDDDSSDDEQEKKPEAPK20002200000000000000        | sp Q13435 SF3B2_HUMAN |
| 4628 | SSSQRSPPGNHTSNSSNASNATVVPQNSSAR2.2002E+32            | sp Q9BTA9 WAC_HUMAN   |
| 4629 | SAAGSEKEEPEDEEEEEEEEEEEYDEEEEEEDDRPPK2.0002E+37      | sp O00267 SPT5H_HUMAN |

|      |                                            |                       |
|------|--------------------------------------------|-----------------------|
| 4630 | IIIEELSLVAASPTLSR2000                      | sp Q16513 PKN2_HUMAN  |
| 4631 | SLSQGSTNSNMLDVQGAHK20000000000000000000    | sp Q8TEU7 RPGF6_HUMAN |
| 4632 | LQEDPNYSPQR20000                           | sp P46379 BAG6_HUMAN  |
| 4633 | DLQEADAGSER2000                            | sp Q6P158 DHX57_HUMAN |
| 4634 | SSLGSLQTPAVTTR2000002000000000             | sp Q7Z2W4 ZCCHV_HUMAN |
| 4635 | HQEVQDQDPVFQGSDDSSGYQSDHKK200000           | sp Q3B726 RPA43_HUMAN |
| 4636 | SRPTSFADELAAR22000000000                   | sp Q641Q2 FA21A_HUMAN |
|      |                                            | sp Q9Y4E1 FA21C_HUMAN |
|      |                                            | sp Q5SNT6 FA21B_HUMAN |
| 4637 | TEIKKEEDQPSTSATQSSPAPGQSK200000000         | sp Q09472 EP300_HUMAN |
| 4638 | TASRPDDIPDSSPK200000000002000              | sp Q5VZK9 LR16A_HUMAN |
| 4639 | QQFYHSVQDLGGSR200                          | sp P10398 ARAF_HUMAN  |
| 4640 | SGGVTEASSLLGGSPR200002000                  | sp Q92729 PTPRU_HUMAN |
| 4641 | LSAITMALQYGESEEDAALAAAR20200000000000      | sp Q86U86 PB1_HUMAN   |
| 4642 | TPTPSTPGDTQPNTAPVPPAEDGIK2.00000000002E+24 | sp Q14839 CHD4_HUMAN  |
| 4643 | ALVHQLSNESR200000                          | sp Q9H4L5 OSBL3_HUMAN |
| 4644 | LSLTSDPEEGDPLALGPESPGEPQPPQLK2E+28         | sp Q5T1M5 FKB15_HUMAN |
| 4645 | ALSSAVQASPTSPGGSPSSSGQR200020000000000     | sp Q03164 KMT2A_HUMAN |
| 4646 | LVEPHSPSPSSK20200000                       | sp O15014 ZN609_HUMAN |
| 4647 | GSVPLSSPPATHFPDETEITNPVK2E+21              | sp P11388 TOP2A_HUMAN |
| 4648 | SPTPPSSAGLGSNSAPPIDSR2.002E+20             | sp Q8IWX8 CHERP_HUMAN |
| 4649 | CSASPPLR200000                             | sp P46013 KI67_HUMAN  |
| 4650 | WAHDKFSGEEGEIEDDESGTENR200000000000020000  | sp Q9Y2W1 TR150_HUMAN |
| 4651 | HSPIAPSSPSPQVLAQK20000020200000000         | sp Q9NQS7 INCE_HUMAN  |
| 4652 | EPLENSASESSDELPEK202002000000000           | sp P78337 PITX1_HUMAN |
| 4653 | SLPAEEGSSGK200000000000                    | sp Q9UKJ3 GPTC8_HUMAN |
| 4654 | VETVSPSESPKDTIDK200000000                  | sp Q99590 SCAFB_HUMAN |
| 4655 | EGEDGDQPTTPKPLK20000000                    | sp P18858 DNLI1_HUMAN |
| 4656 | NYAGEEEEEEGSGSSEGFDPATDR2200000000000      | sp P16989 YBOX3_HUMAN |
| 4657 | GIAPASPMLGNASPNK2010000000000              | sp P27448 MARK3_HUMAN |
| 4658 | SESPPAELPSLR2020000000000                  | sp Q14669 TRIPC_HUMAN |
| 4659 | ATPSENLPSSAR2000000000000                  | sp Q8N684 CPSF7_HUMAN |
| 4660 | RKSLDSESDSK2020200000000                   | sp Q13185 CBX3_HUMAN  |
| 4661 | KDDSHAEDSEDEKEDHK20200020000000000         | sp Q9H1E3 NUCKS_HUMAN |
| 4662 | SATRPSPPERSSTGPEPPAPTLLAER2.00022E+21      | sp Q9UQ35 SRRM2_HUMAN |
| 4663 | DKDQPPSPSPPPQSEALSSTR20000000000000000     | sp Q7L1V2 MON1B_HUMAN |
| 4664 | EEGSLDTEADAVSGQLPDPTNPSAGK2E+21            | sp Q8N1G4 LRC47_HUMAN |
| 4665 | DDISEIQLASDHSGR20002002002000              | sp Q07157 ZO1_HUMAN   |
| 4666 | RSPSPAPPPR20000000000                      | sp Q8IYB3 SRRM1_HUMAN |
| 4667 | SPLLAGGSPQPVVPAHK200000000000              | sp Q8NFH5 NUP53_HUMAN |
| 4668 | TSSLDTITGPYLTGQWPR20000000000000000        | sp Q86VQ1 GLCI1_HUMAN |
| 4669 | EVSPEVVR2000000                            | sp Q5T200 ZC3HD_HUMAN |
| 4670 | FHSPSTWSPNKDTPQEK20000020000000000         | sp Q99590 SCAFB_HUMAN |
| 4671 | MSSPPSPQK200000000                         | sp Q9Y2H6 FND3A_HUMAN |
| 4672 | ASSPSLIER200000000                         | sp A1L170 CA226_HUMAN |
| 4673 | RNSSDSAIDNPKPNK2000000000000               | sp P46100 ATRX_HUMAN  |
| 4674 | GESAPTLSTSPSPSSPSTSPSPTLGR2E+25            | sp Q9H330 TM245_HUMAN |
| 4675 | RLSSASTGKPLSVEDDFEK2002000000000000000     | sp O75152 ZC11A_HUMAN |
| 4676 | HDYDSSSEEQAEDSYEASPGSETQR3E+24             | sp P98175 RBM10_HUMAN |
| 4677 | IGELGAPEVWGLSPK2000                        | sp Q8N5F7 NKAP_HUMAN  |
| 4678 | LTGSTSSLNK20000                            | sp Q9NV70 EXOC1_HUMAN |
| 4679 | GTLSDSEIETNSATSTIFGK200000000000           | sp Q8WXG6 MADD_HUMAN  |
| 4680 | SNSPLPSIQLQPQSPSASK200000000002000000      | sp Q08174 PCDH1_HUMAN |
| 4681 | SPTPPSSAGLGSNSAPPIDSR2.02002E+22           | sp Q8IWX8 CHERP_HUMAN |

|      |                                               |                       |
|------|-----------------------------------------------|-----------------------|
| 4682 | SSLSSSHSQSIYR20000000000000                   | sp 015027 SC16A_HUMAN |
| 4683 | QLSALSSDGEQGGRPVPR200220000000000000          | sp 015438 MRP3_HUMAN  |
| 4684 | ELSNSPLRENSFGSPLEFR200000002000000000         | sp Q9UQ35 SRRM2_HUMAN |
| 4685 | SIDQDYER200000000                             | sp Q9UDY2 ZO2_HUMAN   |
| 4686 | SPDKPGGSPSASR2000000                          | sp Q9Y3T9 NOC2L_HUMAN |
| 4687 | KQPPVSPGTALVGSQK200000000000                  | sp P17096 HMGA1_HUMAN |
| 4688 | GLSPAMSPALQR20002000000                       | sp Q96DF8 DGC14_HUMAN |
| 4689 | SASPEVSEGHENQHGESEAK2.02E+21                  | sp 060930 RNH1_HUMAN  |
| 4690 | TKCPEILSDESSDEDEKK2002220000000               | sp P35659 DEK_HUMAN   |
| 4691 | LISPLASPADGVK200020000000                     | sp Q8WYP5 ELYS_HUMAN  |
| 4692 | SSEGGVGVGPGGGDEPPTS20000                      | sp Q9Y4H2 IRS2_HUMAN  |
| 4693 | YPSSISSSPQK20000                              | sp Q14157 UBP2L_HUMAN |
| 4694 | SPSPGNHTSNSSNASNATVVPQNSSAR220000000000000000 | sp Q9BTA9 WAC_HUMAN   |
| 4695 | AGMSSNQSISSPVLDAVPR120000002000000000         | sp Q9UQ35 SRRM2_HUMAN |
| 4696 | SVQSAAVPAPTSQLLSSLEK2.002E+20                 | sp Q96T58 MINT_HUMAN  |
| 4697 | TKPTQAAGPSSPQKPPTPEETK20000002000000          | sp P18887 XRCC1_HUMAN |
| 4698 | HHFETLTESPCR20000                             | sp 043379 WDR62_HUMAN |
| 4699 | LCSSDTLVSEGEENQKPK200000000000000000          | sp Q5T0W9 FA83B_HUMAN |
| 4700 | LGSTSGEESDLER22000200000                      | sp Q9BW71 HIRP3_HUMAN |
| 4701 | ASESSSEKDDYEIFVK200200000000000000            | sp P18583 SON_HUMAN   |
| 4702 | FDDMSSPGLLEPSCELSR2000000000000000            | sp Q6IN85 P4R3A_HUMAN |
| 4703 | SLAFDSEHSADEK200200000                        | sp Q96L73 NSD1_HUMAN  |
| 4704 | YPSSISSSPQK200000                             | sp Q14157 UBP2L_HUMAN |
| 4705 | REEQTDTSDGESVTHHIR2020000000000000            | sp P36915 GNL1_HUMAN  |
| 4706 | SESSDFEVVPK200000000000                       | sp Q9Y520 PRC2C_HUMAN |
| 4707 | CGGVEQASSSPR2000                              | sp Q5VZL5 ZMYM4_HUMAN |
| 4708 | RNSSSPVSPASVPGQR2200020000000000              | sp Q9H1B7 I2BPL_HUMAN |
| 4709 | NTGIICTIGPASR200                              | sp P14618 KPYM_HUMAN  |
| 4710 | SSPELVTHLK22000000000                         | sp Q07960 RHG01_HUMAN |
| 4711 | VLKEPVNLEGDDTSLIHGK2000000                    | sp Q9H2J7 S6A15_HUMAN |
| 4712 | SVSEHTSCPAESASDAAPLQR2E+20                    | sp Q8WUA7 TB22A_HUMAN |
| 4713 | VDSPSHGLVTSSLCIPSPAR20000000000020000         | sp Q9UER7 DAXX_HUMAN  |
| 4714 | EGHETPMDIDSDDSK200000                         | sp Q8TDB6 DTX3L_HUMAN |
| 4715 | QPEYSPESPR2002000                             | sp Q9H6F5 CCD86_HUMAN |
| 4716 | SDPDGGSPLPASGGPLTCK20000000000000             | sp Q8N1G0 ZN687_HUMAN |
| 4717 | SASPYPHSLSSPQR2020000000020000                | sp Q5T200 ZC3HD_HUMAN |
| 4718 | SSPGSVAASPSGGGR2000000000000000               | sp Q9BXB5 OSB10_HUMAN |
| 4719 | RNSSEASSGDFLDLK2000000000                     | sp Q9UK76 HN1_HUMAN   |
| 4720 | SPFLKPDER2000000000                           | sp Q9H7N4 SFR19_HUMAN |
| 4721 | RKTSDANETEDHLES LICK220000000000000000        | sp Q09161 NCBP1_HUMAN |
| 4722 | TASRPDDIPDPSPPK2000000                        | sp Q5VZK9 LR16A_HUMAN |
| 4723 | GLNSQSSDHLNKR2200000000                       | sp Q96HA1 P121A_HUMAN |
| 4724 | KDELSDWSLAGEDDRDSR2002000000000000            | sp A8CG34 P121C_HUMAN |
| 4725 | RNSTTFPSR20000000                             | sp P51114 FXR1_HUMAN  |
| 4726 | ESGVVAVSPEKSESPQKEDGLSSQLK2.000002E+19        | sp Q96E09 F122A_HUMAN |
| 4727 | GPSPEGSSSTESSPEHPPK200020000000000000         | sp Q96T58 MINT_HUMAN  |
| 4728 | NSSDSAIDNPKPNK20020000000000                  | sp Q9UQ35 SRRM2_HUMAN |
| 4729 | DRSSPPPGYIPDELHQVAR200000000000000000         | sp P46100 ATRX_HUMAN  |
| 4730 | LQQHSEQPPLQPSVMTR2000000                      | sp Q9Y2U5 M3K2_HUMAN  |
| 4731 | YPSSISSSPQK220000                             | sp Q5JTV8 TOIP1_HUMAN |
| 4732 | SKSDGEAKPEPSPSPR200000000002000               | sp Q14157 UBP2L_HUMAN |
| 4733 | EDKSDQSDDEKIQNSDDEER200200000002000000        | sp P26358 DNMT1_HUMAN |
| 4734 | SYTSGPGR2000000000                            | sp Q8WVC0 LEO1_HUMAN  |
|      |                                               | sp P05787 K2C8_HUMAN  |

|      |                                                     |                       |
|------|-----------------------------------------------------|-----------------------|
| 4735 | ASPGTPLSPGSLR2000000                                | sp Q96BD0 S04A1_HUMAN |
| 4736 | NTFTAWSDEESDYEIDDR2000000200000000                  | sp Q6PKG0 LARP1_HUMAN |
| 4737 | RNSVTPLASPEPTK2000002000000                         | sp Q16875 F263_HUMAN  |
| 4738 | HASSSPESPAPAPGSHR202002000000000000                 | sp Q9UQ35 SRRM2_HUMAN |
| 4739 | AAHVPENSDEQDVLTVKPVR2000000000000                   | sp Q9H2Y7 ZN106_HUMAN |
| 4740 | TPASTPVSQTPQASPMIER2000000                          | sp Q9UHR4 BI2L1_HUMAN |
| 4741 | ALEAASLSQHPPSLCISDSEEEEEER2.000000000002E+21        | sp O43159 RRP8_HUMAN  |
| 4742 | MEQQYESSDGTGTEKLPER1000002220000000000              | sp P46100 ATRX_HUMAN  |
| 4743 | SISPEVSASR200000000                                 | sp Q9Y2F5 ICE1_HUMAN  |
| 4744 | KSSISSISGR2200000                                   | sp Q86SQ0 PHLB2_HUMAN |
| 4745 | KPPAPSPVQSQSPSTNWSPAVPVKK20202000000000000          | sp Q8IYB3 SRRM1_HUMAN |
| 4746 | SLQQLAEER2000000000                                 | sp Q13813 SPTN1_HUMAN |
| 4747 | TPQAPASANLVGPR2000000000000000                      | sp Q9UQ35 SRRM2_HUMAN |
| 4748 | ADAPDAGAQSDSELPSYHQNDVSLDR200000000000020000        | sp Q92538 GBF1_HUMAN  |
| 4749 | KAENAEGQTPAIGPDGEPLDETSQMSDLPVK2000000000           | sp P51532 SMCA4_HUMAN |
| 4750 | GTGSGGQLQDLDCSSDDEGAAQNSTKPSATK2E+29                | sp P08240 SRPR_HUMAN  |
| 4751 | SQVAELNDDDKDEIVFK2000000000000000000                | sp Q9BYG3 MK67I_HUMAN |
| 4752 | AKNSPPQAPSTR2000000000                              | sp Q8N1F8 S11IP_HUMAN |
|      |                                                     | sp Q29960 1C16_HUMAN  |
|      |                                                     | sp Q9TNN7 1C05_HUMAN  |
|      |                                                     | sp P04222 1C03_HUMAN  |
|      |                                                     | sp Q07000 1C15_HUMAN  |
|      |                                                     | sp Q29865 1C18_HUMAN  |
| 4753 | GGSCSQAASSNSAQGSDESLIACK2E+20                       | sp Q29963 1C06_HUMAN  |
|      |                                                     | sp P30504 1C04_HUMAN  |
|      |                                                     | sp P30505 1C08_HUMAN  |
|      |                                                     | sp P30508 1C12_HUMAN  |
|      |                                                     | sp P30510 1C14_HUMAN  |
|      |                                                     | sp Q95604 1C17_HUMAN  |
| 4754 | VQSGMGLILQGYESGSEEEGEIHEK2020000000000              | sp Q13523 PRP4B_HUMAN |
| 4755 | TAVDGFQSESPEKLDPVEQGQEDTVAPEVAEKPVGALLGPGAER2E+36   | sp Q9Y232 CDYL1_HUMAN |
| 4756 | NHLSPPQGGATPQVPSCCR200000                           | sp Q9H4L4 SEN3_HUMAN  |
| 4757 | LTSVSSVDFDQR220000000                               | sp Q5T3F8 CSCL2_HUMAN |
| 4758 | SETAAPAAAPPAEK2000000000000000000                   | sp P16403 H12_HUMAN   |
| 4759 | SFPLHSPVAGVAHR2000020000000000                      | sp Q96JN8 NEUL4_HUMAN |
| 4760 | KIPDPSDDVSEVDAR20002000000                          | sp P51532 SMCA4_HUMAN |
| 4761 | ASPAPGSGHPEGGAHLDMNSLDR2E+23                        | sp O94826 TOM70_HUMAN |
| 4762 | SVSPCSNVESR202002000000                             | sp Q9UQ35 SRRM2_HUMAN |
| 4763 | VGDTKEPEPERSPPNR200000                              | sp Q9NZ63 CI078_HUMAN |
| 4764 | SQDATFSPGSEQAEKSPGPIVSR200000000200000000           | sp Q86WB0 NIPA_HUMAN  |
| 4765 | HQYSDYDYHSSSEK220000                                | sp Q9UDY2 ZO2_HUMAN   |
| 4766 | AAPPPALTPDSQTVDSCKTPEVSFLPEEATEEAGVR2.002E+25       | sp Q9H7N4 SFR19_HUMAN |
| 4767 | SLPTTVPESPNYR20000000200000                         | sp Q6PKG0 LARP1_HUMAN |
| 4768 | SGTSSPQSPVFR2200200000                              | sp Q8N556 AFAP1_HUMAN |
| 4769 | AGDNIPEEQPVASTPTTVSDGENKK20000000                   | sp Q9Y320 TMX2_HUMAN  |
| 4770 | LIDLESPTPESQK200000000                              | sp O43166 SI1L1_HUMAN |
| 4771 | ESLKEEDESDDNM2000000                                | sp P25788 PSA3_HUMAN  |
| 4772 | VSPSPSQESLSSSKSDTDTGVCSGTDEDPPDKNAPFR2.02002022E+34 | sp Q5JSH3 WDR44_HUMAN |
| 4773 | KLSSSEPYEEDEFNDDQS1KK2.02E+20                       | sp Q9H4L7 SMRCD_HUMAN |
| 4774 | SPPADAIK2000000000                                  | sp P18754 RCC1_HUMAN  |
| 4775 | SSSTDILEPFTVER2000000000000000                      | sp Q6GYQ0 RGPA1_HUMAN |
| 4776 | NSCNVGGGGGFK2000000000000                           | sp Q7L2J0 MEPCE_HUMAN |
| 4777 | SPQVKPASTMGMPGLGK2000000000000000000                | sp Q13428 TCOF_HUMAN  |
| 4778 | IEDSEPHIPLIDDTDAEDDAPTK2E+20                        | sp P20020 AT2B1_HUMAN |

|      |                                             |                       |
|------|---------------------------------------------|-----------------------|
| 4779 | SLHSAHSLASR200200000                        | sp 015027 SC16A_HUMAN |
| 4780 | KLSSERPSSDGEVVENGGITTCNGK2.000002E+23       | sp Q8N556 AFAP1_HUMAN |
| 4781 | KSDGACDPSDDKENSQIAQDHQK220000000000000000   | sp Q9UIG0 BAZ1B_HUMAN |
| 4782 | SQDQDSEVNELSR20000200000200                 | sp Q86VM9 ZCH18_HUMAN |
| 4783 | DEALQNISADDLPDSASQAHPQDSAFSYR2E+23          | sp Q14C86 GAPD1_HUMAN |
| 4784 | SSPEQPRPSTSK200000020000                    | sp P29590 PML_HUMAN   |
| 4785 | KESESEDSSDDEPLIKK2020022000000000           | sp P35659 DEK_HUMAN   |
| 4786 | SLDSESEDEEDDYQQKR2002000000000000           | sp Q13442 HAP28_HUMAN |
| 4787 | HLLTDLPLPELPGDLSPPDSPEPK2000200000          | sp Q9NYV4 CDK12_HUMAN |
| 4788 | AFLSPPTLLEGPLR200000000000                  | sp 015320 CTGE5_HUMAN |
| 4789 | AASSAAQGAFQGN200000000000                   | sp 015127 SCAM2_HUMAN |
| 4790 | VELSESEEDK20200000                          | sp Q8IYB3 SRRM1_HUMAN |
| 4791 | RSPSPYYSR202000000                          | sp Q13595 TRA2A_HUMAN |
| 4792 | LLELTSSYSPDVSDYK20000000000                 | sp P62995 TRA2B_HUMAN |
| 4793 | WTKPSSFSDSER200000                          | sp P38432 COIL_HUMAN  |
| 4794 | SNSTTQVSQPR2000000000                       | sp Q8NC56 LEMD2_HUMAN |
| 4795 | SASASHQADIK2000000000                       | sp Q9UPN4 CP131_HUMAN |
| 4796 | GPLAGLPGSTPR22000                           | sp Q14739 LBR_HUMAN   |
| 4797 | SGSALLQSQSTEDPKDEPAELKPDSEDLSSQSSASK2.2E+28 | sp Q8WUM0 NU133_HUMAN |
| 4798 | SPSSKPSLAVAVDSAPEVAVK2E+21                  | sp Q5VTR2 BRE1A_HUMAN |
| 4799 | QISYNYSDLQSNVTEETPEGEEHHPVADTENK2E+31       | sp 060508 PRP17_HUMAN |
| 4800 | YEPQSPGYEPR20000000                         | sp Q8NC51 PAIRB_HUMAN |
| 4801 | HKSDSPESDAER20200200000                     | sp Q9H5H4 ZN768_HUMAN |
| 4802 | ASPSPQSSQLQIHR2000000000000000              | sp 075400 PR40A_HUMAN |
| 4803 | SNTPESIAETPPAR2000000000000000              | sp Q9HC35 EMAL4_HUMAN |
| 4804 | GNDPLTSSPGR220000                           | sp Q9Y4H2 IRS2_HUMAN  |
| 4805 | GSGGLFSPSTAHPDVGALGQR2.00002E+20            | sp P49736 MCM2_HUMAN  |
| 4806 | AGSPLCNSNLQDSEEDIEPSYSLFR2.0000000002E+23   | sp Q9C0C2 TB182_HUMAN |
| 4807 | ENSPVQSIR20000000                           | sp Q9NRY4 RHG35_HUMAN |
| 4808 | HKLTVDGEGEGEKK20002000000                   | sp Q7Z2Z1 TICRR_HUMAN |
| 4809 | KPVTVSPTTPTSPTTEGEAS22000000000000          | sp P46100 ATRX_HUMAN  |
| 4810 | TASPPPPPKR20200000000                       | sp Q9Y6G9 DC1L1_HUMAN |
| 4811 | ENSGPVENGVDQEGEEQAREPELPCGLAPAVSR2E+24      | sp Q8IYB3 SRRM1_HUMAN |
| 4812 | YGGSHYSSGYSNSR20000                         | sp Q8TEQ6 GEMI5_HUMAN |
| 4813 | AGGSAALSPSK200                              | sp Q9BRL6 SRSF8_HUMAN |
| 4814 | KSSSEAKPTSLGLAGGHK202000000000000000        | sp Q92522 H1X_HUMAN   |
| 4815 | KGGSYSQAASSDSAQGSVDVSLTACK2000000000        | sp Q96RK0 CIC_HUMAN   |
| 4816 | KLSSSSEPYEDEFNDDQSIKK2.002E+20              | sp P01891 1A68_HUMAN  |
| 4817 | TASISSPSEGTPVGSYGCTPQSLPK2E+27              | sp P01892 1A02_HUMAN  |
| 4818 | TSSAFVGTPEASPEPK2000000000200000            | sp P05534 1A24_HUMAN  |
| 4819 | KYSISSDNDTDDSHATSTSASR2.02E+21              | sp Q09160 1A80_HUMAN  |
| 4820 | SSSLQGMASLPPR2000000000000000               | sp P10316 1A69_HUMAN  |
|      |                                             | sp P30447 1A23_HUMAN  |
|      |                                             | sp Q9H4L7 SMRCD_HUMAN |
|      |                                             | sp Q6PKG0 LARP1_HUMAN |
|      |                                             | sp Q99460 PSMD1_HUMAN |
|      |                                             | sp Q9NQC1 JADE2_HUMAN |
|      |                                             | sp Q9C0J8 WDR33_HUMAN |

|      |                                                  |                       |
|------|--------------------------------------------------|-----------------------|
|      |                                                  | sp P30510 1C14_HUMAN  |
|      |                                                  | sp Q9TNN7 1C05_HUMAN  |
|      |                                                  | sp P04222 1C03_HUMAN  |
|      |                                                  | sp Q07000 1C15_HUMAN  |
|      |                                                  | sp Q29865 1C18_HUMAN  |
| 4821 | GGSCSQAASSNSAQGSDESLIACK20002000000000           | sp Q29960 1C16_HUMAN  |
|      |                                                  | sp Q29963 1C06_HUMAN  |
|      |                                                  | sp P30504 1C04_HUMAN  |
|      |                                                  | sp P30505 1C08_HUMAN  |
|      |                                                  | sp P30508 1C12_HUMAN  |
|      |                                                  | sp Q95604 1C17_HUMAN  |
| 4822 | LSSSDRYSDASDDSFSEPR20020000000000                | sp Q9NRF8 PYRG2_HUMAN |
| 4823 | VADNSFDAK200000                                  | sp Q14978 NOLC1_HUMAN |
| 4824 | TQDPSSPGTTPPQAR20000000000000                    | sp Q13112 CAF1B_HUMAN |
| 4825 | GAAAAATGQPGTAPAGTPGAPPLAGMAIVK2E+24              | sp Q13263 TIF1B_HUMAN |
| 4826 | SKTFNPGAGLPTDK2000000000000000                   | sp P09661 RU2A_HUMAN  |
| 4827 | SSTPLHSPSPIR200002000000                         | sp O95817 BAG3_HUMAN  |
| 4828 | NDFEGLSPVVIAPK2020000000                         | sp Q9H1A4 APC1_HUMAN  |
| 4829 | AAPPPPALTPDSQTVDSCK20000000000000                | sp Q9H7N4 SFR19_HUMAN |
| 4830 | QLPALDGLMGPESPPAQEEEAPVSPHK2E+21                 | sp Q8N9T8 KRI1_HUMAN  |
| 4831 | SFSMQDLR2000000                                  | sp Q9H6H4 REEP4_HUMAN |
| 4832 | ATSSSNPSSPAPDWYK2000000200000000                 | sp P46100 ATRX_HUMAN  |
| 4833 | SKSETGDSSIFR200000000000                         | sp O43166 SI1L1_HUMAN |
| 4834 | GSVILDSGHLSTASSSDDLKGEESFR2200000000000000       | sp Q92614 MY18A_HUMAN |
| 4835 | CSGPGLSPGMVR2001000                              | sp P21333 FLNA_HUMAN  |
| 4836 | SGDETPGSEVPGDKAAEEQGDDQDSEK2E+27                 | sp Q1KMD3 HNRL2_HUMAN |
| 4837 | GPPDFSSDEER2200000                               | sp P42167 LAP2B_HUMAN |
|      |                                                  | sp P42166 LAP2A_HUMAN |
|      |                                                  | sp P30510 1C14_HUMAN  |
|      |                                                  | sp Q9TNN7 1C05_HUMAN  |
|      |                                                  | sp P04222 1C03_HUMAN  |
|      |                                                  | sp Q07000 1C15_HUMAN  |
|      |                                                  | sp Q29865 1C18_HUMAN  |
| 4838 | GGSCSQAASSNSAQGSDESLIACKA200200000000            | sp Q29960 1C16_HUMAN  |
|      |                                                  | sp Q29963 1C06_HUMAN  |
|      |                                                  | sp P30504 1C04_HUMAN  |
|      |                                                  | sp P30505 1C08_HUMAN  |
|      |                                                  | sp P30508 1C12_HUMAN  |
|      |                                                  | sp Q95604 1C17_HUMAN  |
| 4839 | VISHDRDSPPPPPPPPPPPPPQPPSLK2E+19                 | sp Q69YN4 VIR_HUMAN   |
| 4840 | HSASPVVFTSAR20200000000000                       | sp O43166 SI1L1_HUMAN |
| 4841 | ESKEETSIDVAGKPNEVTK2E+19                         | sp P53985 MOT1_HUMAN  |
| 4842 | SGSPSDNSGAEEMEVSLAKPK2.00002E+19                 | sp P31749 AKT1_HUMAN  |
| 4843 | MAESPCSPSGQQPPSPSPDEL PANVK1.00000002000002E+27  | sp Q14160 SCRIB_HUMAN |
| 4844 | ERSDSGGSSEPFDR200002000000                       | sp P48634 PRC2A_HUMAN |
| 4845 | EVEEDESEEMSEDEEDDSSGEEVVIPQK2.00001200000002E+24 | sp P19338 NUCL_HUMAN  |
| 4846 | MSPSGGAPQTPTLR2000000000000000                   | sp Q9BY89 K1671_HUMAN |
| 4847 | SINEENGEVSEDQSQNK200000000200000000              | sp Q13523 PRP4B_HUMAN |
| 4848 | DTLSNPQSPQSPYNSPKPQHK2.0000000003E+19            | sp Q96PU5 NED4L_HUMAN |
| 4849 | SPSGPVKSPPLSPVGTTPVK2000000002000000000          | sp Q9BVC5 ASHWN_HUMAN |
| 4850 | YSPTSPTYSPTSPVYTPTS PK3.00000002000003E+21       | sp P24928 RPB1_HUMAN  |
| 4851 | TPSPPPR20200000                                  | sp Q8IYB3 SRRM1_HUMAN |
| 4852 | QFIAAQNGLPASGHGTPASSPSSSLPSPMSPTPR2E+24          | sp Q8WX93 PALLD_HUMAN |
| 4853 | SVSPCSNVESR2000000000                            | sp Q9UQ35 SRRM2_HUMAN |

|      |                                                              |                       |
|------|--------------------------------------------------------------|-----------------------|
| 4854 | KKSSSEAKPTSLGLAGGHK220000000000000000                        | sp Q96RK0 CIC_HUMAN   |
| 4855 | SNSSEAVLQGEELSAQAK200000000000000000                         | sp Q9BXF6 RFIP5_HUMAN |
| 4856 | SVCGHLENTSVGNPNPSSAENSFR220002000000000000                   | sp Q96HH9 GRAM3_HUMAN |
| 4857 | HTPNTSDNEGSDTEVCGPNSPSK2. 2E+19                              | sp Q8NEN9 PDZD8_HUMAN |
| 4858 | SPSDLHISPLAK2000000200000                                    | sp 095785 WIZ_HUMAN   |
| 4859 | TPTPSTPGDTQPNTAPVPPAEDGIK200020000000000000                  | sp Q14839 CHD4_HUMAN  |
| 4860 | GPASTPTYSPAPTQPAPR200000000000000000                         | sp Q6P1N0 C2D1A_HUMAN |
| 4861 | RHSTSSLSQR2000020000                                         | sp Q03164 KMT2A_HUMAN |
| 4862 | TPASTPVSQTPQASPMIER2000002000000                             | sp Q9UHR4 BI2L1_HUMAN |
| 4863 | DGQSSPQPSPR20000000                                          | sp Q5VZK9 LR16A_HUMAN |
| 4864 | KPISDNSFSSDEEQSTGPIK20000000000000                           | sp 060293 ZC3H1_HUMAN |
| 4865 | RVSVCAETYNPDEEEEDTDPR2E+19                                   | sp P13861 KAP2_HUMAN  |
| 4866 | KDEETESEYDSEHENSEPVTNIR2. 000030200002E+20                   | sp Q15154 PCM1_HUMAN  |
| 4867 | KELSPAGSISK200000000                                         | sp 095453 PARN_HUMAN  |
| 4868 | QEKPAEKPAETPVATSPTATDSTSGDSSR2. 0002E+19                     | sp P54727 RD23B_HUMAN |
| 4869 | EDAATPKAPPAPPPQNLQPESDAPQPGSSPR2000                          | sp Q9Y618 NCOR2_HUMAN |
| 4870 | YGMGTSVER20000                                               | sp P08559 ODPA_HUMAN  |
| 4871 | VVPSFLPVDQGGSLVGR200000                                      | sp Q14126 DSG2_HUMAN  |
| 4872 | GPSQATSPIR200020000                                          | sp Q7RTP6 MICA3_HUMAN |
| 4873 | SESSDFEVVPK2200000000                                        | sp Q9Y520 PRC2C_HUMAN |
| 4874 | GISPIVFDR20000000                                            | sp Q96MU7 YTDC1_HUMAN |
| 4875 | GSISSTSEVHSPNVGLR200200000000000000                          | sp Q8WWQ0 PHIP_HUMAN  |
| 4876 | SYLEGSSDNQLKDESETPVDDR2. 0000220000002E+22                   | sp Q9UHI6 DDX20_HUMAN |
| 4877 | KEDSDEEEDDDSEDEEDEDDEDEDEDEIEPAAMK2. 00000002E+32            | sp P19338 NUCL_HUMAN  |
| 4878 | EFTGSPSSATK200000000                                         | sp Q92609 TBCD5_HUMAN |
| 4879 | DSAPSTPTSPTFLTPGLR200000000000                               | sp Q9NZJ4 SACS_HUMAN  |
| 4880 | TPTSSPASSPLVAK20002000000                                    | sp Q14684 RRP1B_HUMAN |
| 4881 | RPTPNDDLDEGVGLVHSNIATEHIPSPAK20000                           | sp Q01581 HMCS1_HUMAN |
| 4882 | TPASTPVSQTPQASPMIER2000000002000000                          | sp Q9UHR4 BI2L1_HUMAN |
| 4883 | AGGSAALSPSKK200000                                           | sp Q92522 H1X_HUMAN   |
| 4884 | TEMDKSPFNPSQDSR200000000000000000                            | sp P08651 NFIC_HUMAN  |
| 4885 | MSGFIYQ GK200000000                                          | sp Q14155 ARHG7_HUMAN |
| 4886 | DTHEDHDTSTENTDESNHDPQFEPVSLPEQEIK2. 2E+27                    | sp Q15052 ARHG6_HUMAN |
| 4887 | SPPPGMGLNQR200000000000                                      | sp P43487 RANG_HUMAN  |
| 4888 | TLNAETPKSSPLPAK20020000000                                   | sp P23246 SFPQ_HUMAN  |
| 4889 | GGQGDPAVPAQQPADPSTPER20000                                   | sp Q7L2J0 MEPCE_HUMAN |
| 4890 | TLLPWDSDESPEASPGPPGPR2002000200000000                        | sp 015231 ZN185_HUMAN |
| 4891 | ENESSDSEEEVSRPR220200000000                                  | sp Q9UMN6 KMT2B_HUMAN |
| 4892 | KESEEDSSDDEPLIKK2020002000000000                             | sp Q6KC79 NIPBL_HUMAN |
| 4893 | TDCEPVGLEPAVEQSSAASELAEASSEELAEAPTEAPSPPEAR20000000200000000 | sp P35659 DEK_HUMAN   |
| 4894 | LNHSPPQSSSR200000000                                         | sp Q15424 SAFB1_HUMAN |
| 4895 | LHQASASSTSSLSTR2000000                                       | sp Q14151 SAFB2_HUMAN |
| 4896 | GSSGSPAHAESYSSGGGQK2. 2E+20                                  | sp Q5T8P6 RBM26_HUMAN |
| 4897 | SGSSQELDVKPSASPQER202200000000000000                         | sp 015085 ARHGB_HUMAN |
| 4898 | VAESAAAAPQGGPELPPSPASPPEQPPEER2002000000000000               | sp P15408 FOSL2_HUMAN |
| 4899 | RVSHSPPPK20200000                                            | sp Q9UQ35 SRRM2_HUMAN |
| 4900 | SQEPIDDDQKVSDDDKEK20000000                                   | sp Q96N64 PWP2A_HUMAN |
| 4901 | DDGVFVQEVTVQNSPAAR200000                                     | sp Q8IYB3 SRRM1_HUMAN |
| 4902 | SPSPPPTR202000000                                            | sp Q86UE4 LYRIC_HUMAN |
| 4903 | VGVSCKPDSSPVLSPGNK2000200000                                 | sp Q09666 AHNK_HUMAN  |
| 4904 | FHALSSPQSPFPSTPTR20020000000000                              | sp Q8IYB3 SRRM1_HUMAN |
| 4905 | AVPSPTTGEEGSHSR20000000000000                                | sp Q8N4C8 MINK1_HUMAN |
|      |                                                              | sp 043166 SI1L1_HUMAN |
|      |                                                              | sp Q5SYE7 NHSL1_HUMAN |

|      |                                                   |                       |
|------|---------------------------------------------------|-----------------------|
| 4906 | SGSMEEDVDTSPGGDYITSPSSPTSSSR33000020000000        | sp P08651 NFIC_HUMAN  |
| 4907 | AEEKSPIINVK200200000                              | sp Q9UK58 CCNL1_HUMAN |
| 4908 | NHSGSRTPPVALNSSR2020200000000000                  | sp Q9UQ35 SRRM2_HUMAN |
| 4909 | TPPRDLPTIPGVTSPSSDEPPMEASQSHLR2.00002E+23         | sp Q13541 4EBP1_HUMAN |
| 4910 | SHSESASPSALSSSPNLSPTGWSQPK2000020000000000        | sp P04049 RAF1_HUMAN  |
| 4911 | SPSPFTHTHLAQGYR2020000000000000                   | sp P38398 BRCA1_HUMAN |
| 4912 | LSAVSLR2002000                                    | sp Q15036 SNX17_HUMAN |
| 4913 | HGGPGPGPEPELSPITEGSEAR200000000000                | sp Q8WUF5 IASPP_HUMAN |
| 4914 | GTPSQSPVGR200020000000                            | sp P52594 AGFG1_HUMAN |
| 4915 | EKDKEPFTFSSPASGR2002000                           | sp Q6P1X5 TAF2_HUMAN  |
| 4916 | SRSPIIHSPK200002000                               | sp O94913 PCF11_HUMAN |
| 4917 | NQGGGLSSSGAGEGQPK200000000000                     | sp P07814 SYEP_HUMAN  |
| 4918 | ENSPAAFPDR2000000000                              | sp Q9Y5B0 CTDP1_HUMAN |
| 4919 | TLEAEFNPSPTPEPEGPR200000000000                    | sp A0MZ66 SHOT1_HUMAN |
| 4920 | KPPAPSPVQSQSPSTNWSPAVPVK2.000002002002E+19        | sp Q8IYB3 SRRM1_HUMAN |
| 4921 | GHPAQRPEPSPPEPEQAPEGSQAGAEGPSSPEASR20000000       | sp Q6ZW31 SYDE1_HUMAN |
| 4922 | SLSSGESGPGSPTHSHLSR20020000000000000000           | sp Q6P0Q8 MAST2_HUMAN |
| 4923 | DMESPTKLDVTLAK1020000000000000                    | sp P27816 MAP4_HUMAN  |
| 4924 | SPSPPTPEAK20200000000000                          | sp Q8TAQ2 SMRC2_HUMAN |
| 4925 | ATLGPTPTPPQPPDPSPPPQPMQH2E+21                     | sp O60927 PP1RB_HUMAN |
| 4926 | QGSITSPQANEQSVTPQR2200000000000000                | sp Q9UQ35 SRRM2_HUMAN |
| 4927 | IESDTEETQDTSVDHNETGNTGESSVEENEK2E+29              | sp Q6PL18 ATAD2_HUMAN |
| 4928 | KKSPNELVDDLK20000000000000                        | sp Q9UNZ2 NSF1C_HUMAN |
| 4929 | REEQTDSDGESVTHHIR2022000000000000                 | sp P36915 GNL1_HUMAN  |
| 4930 | SCFESSPDELKSR2000000200                           | sp Q9UQ35 SRRM2_HUMAN |
| 4931 | GSVPLSSPPATHFPDETEITNPVPK2E+19                    | sp P11388 TOP2A_HUMAN |
| 4932 | TDALTSSPGR220000                                  | sp P49736 MCM2_HUMAN  |
| 4933 | VKASPIINDGEDEFVPSDGLDKDEYTFSPGK2.000000000002E+28 | sp Q02880 TOP2B_HUMAN |
| 4934 | ALSSDSILSPAPDAR20200000000000                     | sp Q8IVT2 MISP_HUMAN  |
| 4935 | MESEGGADDSAEGLDLLDDDNEDRGDDQLELIKDDEK1.02E+38     | sp P07910 HNRPC_HUMAN |
| 4936 | GPTTGEGALDLSDVHSPKSPEGK2.000000002E+22            | sp O95684 FR10P_HUMAN |
| 4937 | ISDSESDPPR20200000000000                          | sp Q96ST2 IWS1_HUMAN  |
| 4938 | AGSSAAGASGWSAGSLNSVPTNSAQGHNSPDSPTSAAK2000000000  | sp Q86XP3 DDX42_HUMAN |
| 4939 | AYSQEEITQGFEEETGDTLYAPYSTHFQLQNQPPQK2E+33         | sp Q8NFJ5 RAI3_HUMAN  |
| 4940 | GPPDFSSDEER2200000                                | sp P42166 LAP2A_HUMAN |
| 4941 | RTPTPPPR20200000                                  | sp P42167 LAP2B_HUMAN |
| 4942 | GSPNTASAEATLPR2000000000000000                    | sp Q8IYB3 SRRM1_HUMAN |
| 4943 | DMDEPSPVNVVEVTLPK2000000000000000                 | sp Q6PJG6 BRAT1_HUMAN |
| 4944 | APSPTGPAALISGASPVHCAADGTVELK2.0000000002E+25      | sp Q8TAQ2 SMRC2_HUMAN |
| 4945 | SPSPEPIYNSEGKR2020000000000000                    | sp Q76L83 ASXL2_HUMAN |
| 4946 | SVASNQSEMEFSSLQDMPK200201000000000000             | sp Q15637 SF01_HUMAN  |
| 4947 | SQEDEISSPVNK20000000000000                        | sp Q8N163 CCAR2_HUMAN |
| 4948 | RLSPSASPPR202000000                               | sp Q5UIP0 RIF1_HUMAN  |
| 4949 | SASQSSLDKLDQELK20000000000000                     | sp Q8IYB3 SRRM1_HUMAN |
| 4950 | SAPASPTHPLMSR2000200000002000                     | sp O60271 JIP4_HUMAN  |
| 4951 | AAKPGPAEAPSPTASPSGDASPPATAPYDPR200000200000000000 | sp P85037 FOXK1_HUMAN |
| 4952 | SPSKLPEVTDEYK2000000000000000                     | sp Q9UPT8 ZC3H4_HUMAN |
| 4953 | SDSSGGYNLSDIIQSPSSTGLLK300000002000000000         | sp P05455 LA_HUMAN    |
| 4954 | ASHASSDWTTPRPR220000000000                        | sp Q9P2D0 IBTK_HUMAN  |
| 4955 | RGPNYTSGYGTNSELSNPSETESER202000                   | sp Q96EB6 SIR1_HUMAN  |
| 4956 | SPPEALVQGR200000000000                            | sp P51114 FXR1_HUMAN  |
| 4957 | SSSISEEKGSDDEKPR2020000000000000                  | sp Q9UHB6 LIMA1_HUMAN |
| 4958 | LLPSAPQTLPGPLASPAR20000                           | sp Q9UKV3 ACINU_HUMAN |
|      |                                                   | sp O15027 SC16A_HUMAN |



|      |                                                      |                       |
|------|------------------------------------------------------|-----------------------|
| 4959 | HAASYSSDSENQGSYSGVIPPPGR300000000000                 | sp Q96D71 REPS1_HUMAN |
| 4960 | AGMSSNQSISSPVLDAVPR102002022000000000                | sp Q9UQ35 SRRM2_HUMAN |
| 4961 | DEEQSEADAGSGPPTPGPTTLGPK2.000000002E+20              | sp Q6ZRS2 SRCAP_HUMAN |
| 4962 | HGGSPQPLATTPLSQEPVNPPEASPTR2E+25                     | sp Q9UQ35 SRRM2_HUMAN |
| 4963 | ASPGTPLSPGSLR2000002000                              | sp Q96BD0 SO4A1_HUMAN |
| 4964 | AQTLPTSVVTTITSESSPGKR200000                          | sp Q01082 SPTB2_HUMAN |
| 4965 | AEDEILNRSR2000                                       | sp P27824 CALX_HUMAN  |
| 4966 | RGTSPRPPEGGLGYSQLGDDDLK2.2E+21                       | sp Q9UQ88 CD11A_HUMAN |
| 4967 | KPSPSEPEPWKPFPAVSPEPR2.02E+20                        | sp P21127 CD11B_HUMAN |
| 4968 | GDRSPEPGQWTR20000000000                              | sp Q96JM3 CHAP1_HUMAN |
| 4969 | GQEVETSVTYR2000000                                   | sp Q09666 AHNK_HUMAN  |
| 4970 | GGNFGFGDSR200                                        | sp 043169 CYB5B_HUMAN |
| 4971 | SPSAEFSPAAPPGISSIHSPSLR2E+21                         | sp P22626 ROA2_HUMAN  |
| 4972 | SPPPEMDTPTSTR200000100000000                         | sp Q68DK2 ZFY26_HUMAN |
| 4973 | SLNFQEDDTSR2000                                      | sp P46013 KI67_HUMAN  |
| 4974 | SPGSTPTTSSQAPQK2202000000000000                      | sp Q9H814 PHAX_HUMAN  |
| 4975 | TSSTLDSEGTFNYSR2000000000000000                      | sp P35658 NU214_HUMAN |
| 4976 | DSSSTDSANEKPALIPR20020200000000000                   | sp Q92609 TBCD5_HUMAN |
| 4977 | METEADAPSPAPSLGER10000002000000000                   | sp Q9NUQ6 SPS2L_HUMAN |
| 4978 | ILCKSPQSDPADTPTNTK200000000000000                    | sp Q12873 CHD3_HUMAN  |
| 4979 | SCTPSPDQISHR2020200000000                            | sp P46013 KI67_HUMAN  |
| 4980 | HQSDGNEIAHTR20000000000                              | sp Q7Z2W4 ZCCHV_HUMAN |
| 4981 | NSSDSAIDNPKPNKLPK2200000000000000                    | sp 043166 SIL1_HUMAN  |
| 4982 | KRSPTESVNTVPVK20000000000                            | sp P46100 ATRX_HUMAN  |
| 4983 | QSSGSATNVASTPDNR20000000000                          | sp Q8WXG6 MADD_HUMAN  |
| 4984 | TLENSPISCDTSDTEGPVNVNSAAVLK2.0022002E+24             | sp Q7Z460 CLAP1_HUMAN |
| 4985 | AKSPTPSPPR20202000000                                | sp Q8N556 AFAP1_HUMAN |
| 4986 | SRDATPPVSPINMEDQER200020002000000000                 | sp Q8IYB3 SRRM1_HUMAN |
| 4987 | TNLTQSSTTNLPGSPGSPGSPGSPGSPGSPK200200200000000       | sp P17275 JUNB_HUMAN  |
| 4988 | SQSIEQESQEK20000000000                               | sp Q6IN85 P4R3A_HUMAN |
| 4989 | LALAGEGEACPLLGSPGAGR2000000                          | sp Q5VTL8 PR38B_HUMAN |
| 4990 | EHYPVSSPSPSPAQPGGVSRR2000000000000000                | sp Q96F46 I17RA_HUMAN |
| 4991 | NYAGEEEEEEGSGSSEGFDPATDR20020000000000               | sp 075179 ANR17_HUMAN |
| 4992 | SLSPNHNTLQTLK2020000000000                           | sp P16989 YBOX3_HUMAN |
| 4993 | GQKPALDCSQVSPRPATSPENNASLSDTSPMDSSPSGIPK2.000002E+23 | sp 075592 MYCB2_HUMAN |
| 4994 | YQPLASTASDNDFVTPEPR20000000000000                    | sp P18858 DNLI1_HUMAN |
| 4995 | SVEDVRPHHTDANNQSACFEAPDQK2000000000000000            | sp Q15021 CND1_HUMAN  |
| 4996 | SSDYQFPSSPFTDTLK2000000200000000                     | sp Q9Y520 PRC2C_HUMAN |
| 4997 | DLSTSPKPSPIPSPVLGR200020002000000                    | sp Q9UK61 F208A_HUMAN |
| 4998 | GSAPHSEDLPEQEEEILGSDDEQEDPNDYCK2.0002E+32            | sp Q8NDI1 EHP1_HUMAN  |
| 4999 | KLSSSEPYEDEFNDDQS IKK2.2E+20                         | sp Q96SB4 SRPK1_HUMAN |
| 5000 | SSSGLGSSGSLSQK20000000                               | sp Q9H4L7 SMRCD_HUMAN |
| 5001 | RPSGPDGAAR200000000                                  | sp Q15648 MED1_HUMAN  |
| 5002 | LPQSSSESSPPSPQPTK2002000000                          | sp Q8NDX5 PHC3_HUMAN  |
| 5003 | SSGHSSSELSPDAVEK200020000000                         | sp Q9UQ35 SRRM2_HUMAN |
| 5004 | QLSALHR200000                                        | sp Q9UQ35 SRRM2_HUMAN |
| 5005 | SPVGSQAPAAAPAAHVAGNPGDAAPAATGTAASLATAAGSEDAEKK2E+52  | sp P61313 RL15_HUMAN  |
| 5006 | GEPNVSYICSR300000                                    | sp P16989 YBOX3_HUMAN |
| 5007 | ASESSSEKDDYEIFVK20220000000000000                    | sp P49841 GSK3B_HUMAN |
| 5008 | STPLASPSPPGR20000002000000                           | sp P49840 GSK3A_HUMAN |
|      |                                                      | sp P18583 SON_HUMAN   |
|      |                                                      | sp Q8WYP5 ELYS_HUMAN  |

|      |                                                     |                       |
|------|-----------------------------------------------------|-----------------------|
| 5009 | KSLSPGVSER202000000                                 | sp Q9UKV3 ACINU_HUMAN |
| 5010 | GSDALSETSSVSHIEDLEK2002000000000000                 | sp Q6P996 PDXD1_HUMAN |
| 5011 | LRLSPSPTSQR200020000                                | sp P02545 LMNA_HUMAN  |
| 5012 | SGKDSEAWVPDSEER2000200000000000                     | sp Q96F63 CCD97_HUMAN |
| 5013 | DVTNFTVGGFAPMSR2000                                 | sp 000267 SPT5H_HUMAN |
| 5014 | SAEPRPELPGQETGTNSR200                               | sp Q9Y4B5 MTCL1_HUMAN |
| 5015 | KGSFSALVGR2000000000                                | sp Q13619 CUL4A_HUMAN |
| 5016 | GLNPDGTPALSTLGGFSPASKPSSPR2E+20                     | sp Q9UK58 CCNL1_HUMAN |
| 5017 | SRSGEGEVSGLMR20000000000000                         | sp Q13263 TIF1B_HUMAN |
| 5018 | SNVSSPATPTASSSSSTPTR200000000000000000              | sp Q12888 TP53B_HUMAN |
| 5019 | ESLKEEDESDDNM2000000000000000                       | sp P25788 PSA3_HUMAN  |
| 5020 | SNSQSDSHDEEVSPPPNPVK200000200000000000              | sp P31321 KAP1_HUMAN  |
| 5021 | LAGGQTSQPTPLTSPQR200020000                          | sp 095155 UBE4B_HUMAN |
| 5022 | THSFENVSCHLPDSR2000000000000000                     | sp Q5VZ89 DEN4C_HUMAN |
| 5023 | KGSISSTQDTPVAVEEDCSLASSK20020000000000000000        | sp Q9BZ71 PITM3_HUMAN |
| 5024 | ASSSPEPPAVAELSDSGQEPEDGGPAPGEASQGSSEGAQGLASASR2E+34 | sp Q9C0C9 UBE20_HUMAN |
| 5025 | VMTIPYQMPASSPVICAGGQDR100020000000000000            | sp Q15365 PCBP1_HUMAN |
| 5026 | KPSQTLQPSEDLADGK2000000000000000                    | sp Q13029 PRDM2_HUMAN |
| 5027 | RTSDPSAAVNHVSSTTSLGENYEDDLVNSDEVMK2E+30             | sp Q8NHH9 ATLA2_HUMAN |
| 5028 | HASSSPESPAPAPGSHR222002000000002000                 | sp Q9UQ35 SRRM2_HUMAN |
| 5029 | GLSLSPQSPPER200200000                               | sp Q7Z2Z1 TICRR_HUMAN |
| 5030 | NMTVEQLLTGSPTSPTVEPEKPTR20000000000000              | sp Q9C0C9 UBE20_HUMAN |
| 5031 | I IYDSSESEETLQVK3000200000000000                    | sp P35251 RFC1_HUMAN  |
| 5032 | MPGMSPANPSLHSPVPDASHSPR200000002000                 | sp 060244 MED14_HUMAN |
|      |                                                     | sp P01891 1A68_HUMAN  |
|      |                                                     | sp P10316 1A69_HUMAN  |
| 5033 | GGSYSQAASSDSAQGSVDVSLTACK2000000000000000           | sp P05534 1A24_HUMAN  |
|      |                                                     | sp P30447 1A23_HUMAN  |
|      |                                                     | sp Q09160 1A80_HUMAN  |
|      |                                                     | sp P01892 1A02_HUMAN  |
| 5034 | ISSKSPGHMVILDQTK2002000000000000                    | sp Q9NWH9 SLTM_HUMAN  |
| 5035 | ISAESPTGLPSHK2000000000                             | sp Q96C24 SYTL4_HUMAN |
| 5036 | SPSGHPHVR2000000000                                 | sp Q8WX93 PALLD_HUMAN |
|      |                                                     | sp P05534 1A24_HUMAN  |
|      |                                                     | sp P30447 1A23_HUMAN  |
|      |                                                     | sp P01891 1A68_HUMAN  |
| 5037 | GGSYSQAASSDSAQGSVDVSLTACK2000000000                 | sp P01892 1A02_HUMAN  |
|      |                                                     | sp Q09160 1A80_HUMAN  |
|      |                                                     | sp P10316 1A69_HUMAN  |
| 5038 | SLDSESEDEEDDYQQR20000020000000000000                | sp Q13442 HAP28_HUMAN |
| 5039 | RVSTDLPEGQDVYTAACNSV IHR2E+20                       | sp Q15751 HERC1_HUMAN |
| 5040 | SYLEGSSDNQLK2000000                                 | sp Q9UHI6 DDX20_HUMAN |
| 5041 | AGLESGAEPGDGSDTTK200                                | sp 060832 DKC1_HUMAN  |
| 5042 | ETSVSKEDTDHEEK20000002000000                        | sp 075475 PSIP1_HUMAN |
| 5043 | SPSDSSTASTPVAEQIER202000000000000000                | sp Q16643 DREB_HUMAN  |
| 5044 | SVCPGGSSPGSSSGGR200000000000                        | sp Q53LP3 SWAHC_HUMAN |
| 5045 | YFEADPPGQVAASPDPTT2000000                           | sp 043598 DNPH1_HUMAN |
| 5046 | LPNNSRPSTPTINVLESK22000000000000                    | sp Q15910 EZH2_HUMAN  |
| 5047 | KRSSSEDAESLAPR22200000000000                        | sp Q4G0J3 LARP7_HUMAN |
| 5048 | LSNGSFSAPSLTNSR2002000000000000                     | sp 094806 KPCD3_HUMAN |
| 5049 | GSSDGRGSDSEDLPHR200002020000000000                  | sp Q9UPQ0 LIMC1_HUMAN |
| 5050 | WDQTADQTPGATPK2000                                  | sp 075533 SF3B1_HUMAN |
| 5051 | HAPTYTIPLSPVLSPTLP AEAPTAQVPPSLPR2. 02E+19          | sp Q9NPI6 DCP1A_HUMAN |

|      |                                               |                       |
|------|-----------------------------------------------|-----------------------|
| 5052 | TENGTCPSPPLSPAAALGSGSAAAVPK2.000002E+22       | sp Q12948 FOXC1_HUMAN |
| 5053 | DSAYISSPLGSHQVDFDR2000000000000               | sp Q9HCD6 TANC2_HUMAN |
| 5054 | YRPENTPEPVSTSVSHYGAEPTTVSPCPSSSAK2000000000   | sp P07947 YES_HUMAN   |
| 5055 | ALVEFESNPEETREPGSPSVQR20000000                | sp Q9H6F5 CCD86_HUMAN |
| 5056 | SSGHSSSELSPDAVEK22000000020000000             | sp Q9UQ35 SRRM2_HUMAN |
| 5057 | VSSPLPSPSAMTDAANSQAAA2.000002E+20             | sp Q8WXI9 P66B_HUMAN  |
| 5058 | TFGHNTMDAVPR2000020000000                     | sp P55011 S12A2_HUMAN |
| 5059 | NRPTSISWDGLDSGK200000000000                   | sp P30086 PEBP1_HUMAN |
| 5060 | VEQATKPSFESGR2000000                          | sp P38159 RBMX_HUMAN  |
| 5061 | SSLSSHSHQSQIYR220000000000000                 | sp O15027 SC16A_HUMAN |
| 5062 | LLSSNEDDANILSSPTDR20000000000002000           | sp O75448 MED24_HUMAN |
| 5063 | DGDSYDPYDFSDTEEMPVHTPK300200000100000000      | sp P25205 MCM3_HUMAN  |
| 5064 | NAEEEESEAEEGD2000000000                       | sp Q7L1Q6 BZW1_HUMAN  |
| 5065 | LQQQLQGGSR200                                 | sp Q9UP83 COG5_HUMAN  |
| 5066 | LLSPQQPALQR2000000000                         | sp Q14814 MEF2D_HUMAN |
| 5067 | QQPPEPEWIGGESTSPSDK200000                     | sp Q8NE71 ABCF1_HUMAN |
| 5068 | ELSNSPLR20000                                 | sp Q9UQ35 SRRM2_HUMAN |
| 5069 | RPDHSGGSPSPPTSEPAR200002000000                | sp Q8TAD8 SNIP1_HUMAN |
| 5070 | AASSSPGSPVASSPSR2000000000000000              | sp Q92538 GBF1_HUMAN  |
| 5071 | MNEEISSDSESESLAPR2200000000000                | sp O43818 U3IP2_HUMAN |
| 5072 | DHSPTPSVFNSDEER2020000000000                  | sp Q6UN15 FIP1_HUMAN  |
| 5073 | LLESSLSSEGEPEYK20000000000                    | sp P08648 ITA5_HUMAN  |
| 5074 | LGSSGLGSASSIQAAVR20200000000                  | sp Q7Z6Z7 HUWE1_HUMAN |
| 5075 | MSPNETLFLESTNK20000                           | sp Q9HB90 RRAGC_HUMAN |
| 5076 | VHEPPREDAAPTKPAPPAPPPQNLQPESDAPQQPGSSPR2000   | sp Q9NQL2 RRAGD_HUMAN |
| 5077 | GGWDHGDTSIQSSR2002000                         | sp Q9Y618 NCOR2_HUMAN |
| 5078 | SHSESASPSALSSPNLSPTGWSQPK22200002000000000    | sp Q9P206 K1522_HUMAN |
| 5079 | SRSSSVGSSSYPIPAVSR220020000000000000          | sp P04049 RAF1_HUMAN  |
| 5080 | SKTPSSPCASK220000000                          | sp Q15149 PLEC_HUMAN  |
| 5081 | KLSVPTSDEEDEVPAKPR200200000000000000          | sp Q9NQS7 INCE_HUMAN  |
| 5082 | YSVLNDDYFADVPLR20000                          | sp Q8NE71 ABCF1_HUMAN |
| 5083 | SGKNSQEDSESDKDKV200020020000000               | sp Q1ED39 KNOP1_HUMAN |
| 5084 | SQSSDLLER2000000000                           | sp Q9H1E3 NUCKS_HUMAN |
| 5085 | EVHDELEDLSPPPPPLSPPTTSPHK20000020000020000    | sp Q8IVT2 MISP_HUMAN  |
| 5086 | SPYKFPSSPLR200000020000                       | sp Q9NQX3 GEPH_HUMAN  |
| 5087 | SPGSSWQEYGPSDTGSR200000000000000000           | sp P06400 RB_HUMAN    |
| 5088 | QRGSETGSETHESDLAPSDK202020000000000000        | sp Q5JSZ5 PRC2B_HUMAN |
| 5089 | TIGGGDDSFNTFFSETGAGK20000000000000            | sp P48634 PRC2A_HUMAN |
| 5090 | DDSPDEVSTFTVQQPPPSR200000000000               | sp Q71U36 TBA1A_HUMAN |
| 5091 | HTDDEMTGYVATR20300000                         | sp P68363 TBA1B_HUMAN |
| 5092 | MLPHAPGVQQAIPEDAVHEDSGDEDGEDPDKR200000000000  | sp Q6PEY2 TBA3E_HUMAN |
| 5093 | ISLEQPPNGSDTPNPEK200000000                    | sp Q9BQE3 TBA1C_HUMAN |
| 5094 | GLAEVQQDGEAEEGATSDGEK200000                   | sp Q13748 TBA3C_HUMAN |
| 5095 | QLMEQDASSPSAQVIGLK20000000000                 | sp Q8N328 PGBD3_HUMAN |
| 5096 | CSDVSELSSPPGYPYHQEPYVCKPEER200000000000000000 | sp Q16539 MK14_HUMAN  |
| 5097 | GLSLVDKENTPPALSGTR2000000000                  | sp Q92769 HDAC2_HUMAN |
| 5098 | RDSGDVDGFEAEGK2000000000000                   | sp Q9UHI6 DDX20_HUMAN |
| 5099 | EAASSPAGEPLR200000000                         | sp Q02952 AKA12_HUMAN |
| 5100 | SESPPAELPSLR2000000000000                     | sp Q9H4L5 OSBL3_HUMAN |
|      |                                               | sp Q9Y478 AAKB1_HUMAN |
|      |                                               | sp P31350 RIR2_HUMAN  |
|      |                                               | sp Q96KR1 ZFR_HUMAN   |
|      |                                               | sp Q96EB6 SIR1_HUMAN  |
|      |                                               | sp Q14669 TRIPC_HUMAN |

|      |                                                       |                       |
|------|-------------------------------------------------------|-----------------------|
| 5101 | GGHSSVSTESESSSFHSS20                                  | sp P61073 CXCR4_HUMAN |
| 5102 | TIAHSPTSFTESSSK200000000000                           | sp Q03164 KMT2A_HUMAN |
| 5103 | YSEFTSTSGTGHNQTR22000000000                           | sp P48960 CD97_HUMAN  |
| 5104 | SGSSQELDVKPSASPQER202200000000200000                  | sp Q9UQ35 SRRM2_HUMAN |
| 5105 | TSPADHGGSVSGSESGSAVDSVAGEHSVSGR2.02002E+20            | sp Q5T4S7 UBR4_HUMAN  |
| 5106 | FFTTGSDSESESSLGEELVTKPVGGNYGK2.02E+27                 | sp B5ME19 EIFCL_HUMAN |
| 5107 | SDSEESGSEEEEEEEEEEQPAAQPPTLPVEEK2.0200202E+33         | sp Q99613 EIF3C_HUMAN |
| 5108 | MSPNETLFLESTNK20000                                   | sp P51532 SMCA4_HUMAN |
| 5109 | LDNTPASPPRSPAEPNDIPIAK2.0000002E+19                   | sp Q9NQL2 RRAGD_HUMAN |
| 5110 | LSSAGPRSPYCK20000200000                               | sp Q9HB90 RRAGC_HUMAN |
| 5111 | ALEAASLSQHPPSLCISDSEEEEEER20200000000                 | sp 095359 TACC2_HUMAN |
|      |                                                       | sp Q6PL18 ATAD2_HUMAN |
|      |                                                       | sp 043159 RRP8_HUMAN  |
|      |                                                       | sp P05534 1A24_HUMAN  |
|      |                                                       | sp Q09160 1A80_HUMAN  |
| 5112 | KGGSYSQAASSDSAQGSVSLTACK20002002000000                | sp P30447 1A23_HUMAN  |
|      |                                                       | sp P01891 1A68_HUMAN  |
|      |                                                       | sp P01892 1A02_HUMAN  |
|      |                                                       | sp P10316 1A69_HUMAN  |
| 5113 | CVSVQTDPTDEIPTKK2000000000000000                      | sp P18583 SON_HUMAN   |
| 5114 | AQTTPGPSLSGSKSPCPQEK2000000000020000000               | sp Q9UQ35 SRRM2_HUMAN |
| 5115 | RGTSPRPPEGGLGYSQLGDDDLK2.2E+21                        | sp P21127 CD11B_HUMAN |
|      |                                                       | sp Q9UQ88 CD11A_HUMAN |
| 5116 | KASVDPSTESSPAPQEGSEQPASPASPLSSR2E+30                  | sp Q66K14 TBC9B_HUMAN |
| 5117 | QFIAAQNLGPASGHGTPASSPSSSSLPSPMPTPR200200000           | sp Q8WX93 PALLD_HUMAN |
| 5118 | SPSFGGASEASAR2000000000000000                         | sp Q8WVT3 TPC12_HUMAN |
| 5119 | IVSAQSLAEDDVE200200000000                             | sp Q15388 TOM20_HUMAN |
| 5120 | SSRSSPELTR2022000000                                  | sp Q9UQ35 SRRM2_HUMAN |
| 5121 | GSSPGIQDTLEAEDGAFETDEAPEDR20000000000000000000        | sp Q9UNX4 WDR3_HUMAN  |
| 5122 | ACASPSAQVEGSPVAGSDGSQPAVK2.0000002E+22                | sp Q9UFC0 LRWD1_HUMAN |
| 5123 | VISDESIDGGSDVEFKPDTK20000200000000000                 | sp P52701 MSH6_HUMAN  |
| 5124 | QNPEQSADEDAEK2000000000                               | sp B5ME19 EIFCL_HUMAN |
|      |                                                       | sp Q99613 EIF3C_HUMAN |
| 5125 | DGDSYDPYDFSDTEEMPQVHTPK2.0003E+21                     | sp P25205 MCM3_HUMAN  |
| 5126 | GTEPSPGGTPQPSRPVSPAGPPEGVPEEAQPPR2.0002E+25           | sp Q8WUZ0 BCL7C_HUMAN |
| 5127 | SPPPEVDPTSTK200000002000000                           | sp P46013 KI67_HUMAN  |
| 5128 | GAAEEAELESDDEEKPVKQDDFPK20000000000000000             | sp Q9UBB9 TFP11_HUMAN |
| 5129 | TASESISNLSEAGSIK20002000                              | sp P30622 CLIP1_HUMAN |
| 5130 | AASPSQSVR202002000                                    | sp Q8IYB3 SRRM1_HUMAN |
| 5131 | TKPTQAAGPSSPKPPTPEETK2.000000000002E+19               | sp P18887 XRCC1_HUMAN |
| 5132 | CSVSLSNVEAR2000000000                                 | sp P47712 PA24A_HUMAN |
| 5133 | QSSLTFQSSDPEQMR2000000000000000                       | sp P47712 PA24A_HUMAN |
| 5134 | STSAPQMSPGSSDNQSSSPQAQK2.00002E+23                    | sp Q53SF7 COBL1_HUMAN |
| 5135 | ASETVSEASPGSTASQTGVPTQVVQQVQGTQQR20000000000000000000 | sp Q14157 UBP2L_HUMAN |
| 5136 | SYSPDGKESPSDKK2000002000000                           | sp P22670 RFX1_HUMAN  |
| 5137 | LIHGEDSDSEEEEEGRGSSGCSEAGGAGHEEGR2.020000000022E+27   | sp P43243 MATR3_HUMAN |
| 5138 | GPTSSPCEEEGDEGEEDRTSDLR2.2E+20                        | sp Q9C0C9 UBE20_HUMAN |
| 5139 | GSPSPEKPDVEK202000000000                              | sp Q86VM9 ZCH18_HUMAN |
| 5140 | NSDLLTSPDVGLLK2000000000                              | sp Q93074 MED12_HUMAN |
| 5141 | ASDKDITVSK2000000000                                  | sp P05412 JUN_HUMAN   |
|      |                                                       | sp P49790 NU153_HUMAN |
| 5142 | TEPAAEAEAAAGPSESPSPAEEELPGSHAEPVPAQGEAPGEQAR2.02E+33  | sp P55884 EIF3B_HUMAN |
| 5143 | VQDTSNTGLGEDIHQLSK20000000000000000                   | sp Q8IWA0 WDR75_HUMAN |
| 5144 | EQYVPPRSPK2000                                        | sp Q71RC2 LARP4_HUMAN |

|      |                                               |                       |
|------|-----------------------------------------------|-----------------------|
| 5145 | LSSASTGKPLSVEDDFEK20002000000000000000        | sp 075152 ZC11A_HUMAN |
| 5146 | HEAPSSPISGQPCGDDQNASPSK2E+19                  | sp 075376 NCOR1_HUMAN |
| 5147 | SSIEDAQCPGLPDLIEENHVVNK2E+22                  | sp Q15398 DLGP5_HUMAN |
| 5148 | SPPAVSPSPSTDHSSHFSNFNDSR2.000002E+26          | sp P42694 HELZ_HUMAN  |
| 5149 | SPGNLTER200000000                             | sp Q9H0F6 SHRPN_HUMAN |
| 5150 | SNSNAVSAIPINK2000000000000                    | sp P05549 AP2A_HUMAN  |
| 5151 | SNSEVEDVGPTSHNR20000000000000000000           | sp Q13206 DDX10_HUMAN |
| 5152 | SPSMVSPSPGWVSPK20000002000002000              | sp Q86UU0 BCL9L_HUMAN |
| 5153 | KLSVLGK200000                                 | sp Q8NFC6 BD1L1_HUMAN |
| 5154 | AQTPPISSLPTSPSDEVGR2000000002000000000        | sp Q15751 HERC1_HUMAN |
| 5155 | EEGPPPPSPDGASSDAEPEPPSGR20000000000000000000  | sp Q9NTJ3 SMC4_HUMAN  |
| 5156 | LDSSPSVSTLAAK2000000000000                    | sp Q13428 TCOF_HUMAN  |
| 5157 | QLPALDGLMGPESPPAQEEEEAPVSPHK2000000000020000  | sp Q8N9T8 KRI1_HUMAN  |
| 5158 | RYSPPPPKR202000000                            | sp Q8IYB3 SRRM1_HUMAN |
| 5159 | SLSPGVS202000000                              | sp Q9UKV3 ACINU_HUMAN |
| 5160 | SLSSPTVTLAPLEGAK20220000000000000000          | sp Q96PU5 NED4L_HUMAN |
| 5161 | DSGSDQDLDGAVRASDLEDEESAAR2.02000000000002E+25 | sp Q86VM9 ZCH18_HUMAN |
| 5162 | GHTASESDEQQWPEEK2000000000000000              | sp Q9NTI5 PDS5B_HUMAN |
| 5163 | ASVALTPTAPSR20000200                          | sp P28290 SSFA2_HUMAN |
| 5164 | SKLSPSPSLR20200000                            | sp Q5T200 ZC3HD_HUMAN |
| 5165 | MSGGSTMSSGGNTNNSNSK2E+19                      | sp Q86U70 LDB1_HUMAN  |
| 5166 | AGMSSNQSISSPVLDVPR1000020220000000000         | sp Q9UQ35 SRRM2_HUMAN |
| 5167 | STSAPQMSPGSSDNQSSSPQPAQQK1.00000000002E+19    | sp Q14157 UBP2L_HUMAN |
| 5168 | SPISDNSGCDAPGNSNPSPSSAESEK2.002002E+29        | sp Q99590 SCAFB_HUMAN |
| 5169 | ATSPSSSVSGDFDDGHHSVSTPGPSR2.2E+22             | sp Q86U86 PB1_HUMAN   |
| 5170 | RYPSSISSPQK200020000                          | sp Q14157 UBP2L_HUMAN |
| 5171 | KPIKSPSKDASSGK20200000000                     | sp Q13523 PRP4B_HUMAN |
| 5172 | AENNSEVGASGYGVPGPTWDR20000000000000000000     | sp Q08211 DHX9_HUMAN  |
| 5173 | SESPCESPYPNEK2000000000000                    | sp Q8NI27 THOC2_HUMAN |
| 5174 | GSGSQSSVPSVDQFTGVGIR20000000000000000000      | sp Q9UQE7 SMC3_HUMAN  |
| 5175 | SGSSQELDVKPSASPQER2000000000000200000         | sp Q9UQ35 SRRM2_HUMAN |
| 5176 | WAHDKFSGEIEEDDESGTENREEK2.00000000002E+20     | sp Q9Y2W1 TR150_HUMAN |
| 5177 | ILDEDSWSDGEQEPITVDQTWR20200000000000000000    | sp Q9H9L4 KANL2_HUMAN |
| 5178 | RSPSPYYSR202000000                            | sp P62995 TRA2B_HUMAN |
| 5179 | ASSPSLIER20000000                             | sp Q13595 TRA2A_HUMAN |
| 5180 | LPSTSGSEGVPR202000000000                      | sp A1L170 CA226_HUMAN |
| 5181 | TSLDIEEYSDTEVQK20000000                       | sp P29317 EPA2_HUMAN  |
| 5182 | APQQQPPPPQPPPPQPPPPQPPPPPSYSPAR20000          | sp P51580 TPMT_HUMAN  |
| 5183 | KAEDSDSEPEPEDNVR2000000000000                 | sp Q9BUJ2 HNRL1_HUMAN |
| 5184 | ESKDKPEIEDVGSDEEEEK200000000                  | sp Q9H0D6 XRN2_HUMAN  |
|      |                                               | sp Q14568 HS902_HUMAN |
|      |                                               | sp P30505 1C08_HUMAN  |
|      |                                               | sp Q9TNN7 1C05_HUMAN  |
|      |                                               | sp Q29960 1C16_HUMAN  |
|      |                                               | sp P30508 1C12_HUMAN  |
|      |                                               | sp Q95604 1C17_HUMAN  |
| 5185 | GGSCSQAASSNSAQGSDESLIACK2000000000            | sp Q07000 1C15_HUMAN  |
|      |                                               | sp Q29963 1C06_HUMAN  |
|      |                                               | sp P30510 1C14_HUMAN  |
|      |                                               | sp P04222 1C03_HUMAN  |
|      |                                               | sp Q29865 1C18_HUMAN  |
|      |                                               | sp P30504 1C04_HUMAN  |
| 5186 | NYQQNYQNSGESGEKNEGSESAPEGQAQR2020000000000    | sp P67809 YBOX1_HUMAN |

|      |                                                  |                       |
|------|--------------------------------------------------|-----------------------|
| 5187 | LSPSPSSR200000                                   | sp Q03252 LMNB2_HUMAN |
|      |                                                  | sp P20700 LMNB1_HUMAN |
| 5188 | NATDLQNSSMSEEELTK2000000000                      | sp P40855 PEX19_HUMAN |
| 5189 | TASISSPSEGTPTVGSYGCTPQSLPK2.02E+25               | sp Q6PKG0 LARP1_HUMAN |
| 5190 | KESESEDSSDEPLIKK2000022000000000                 | sp P35659 DEK_HUMAN   |
| 5191 | EGDPVSLSTPLETEFGSPSELSR2002000                   | sp Q9BUR4 WAP53_HUMAN |
| 5192 | QERLSPEVAPPAHR200000000000                       | sp Q8TAD8 SNIP1_HUMAN |
| 5193 | QSGSSQPMEVQEGYFGSGDDPYSSAEPHVSGVK2E+31           | sp Q13263 TIF1B_HUMAN |
| 5194 | EHYPVSSPSSPPAQPGVSR2000020000000000              | sp 075179 ANR17_HUMAN |
| 5195 | AQRQSCTSVGR20000000                              | sp Q9NYZ3 GTSE1_HUMAN |
| 5196 | RHSSDINHVLVTQGR22000000000000                    | sp Q5TON5 FBP1L_HUMAN |
| 5197 | RRSPPPGPDGHAK200000000000                        | sp P57081 WDR4_HUMAN  |
| 5198 | HSQSPPEPHSPTEPPAWGSSIVK2.00002E+19               | sp Q5VZ89 DEN4C_HUMAN |
| 5199 | KPSGSPDLWKLSPDQR2000000200000                    | sp Q96JM3 CHAP1_HUMAN |
| 5200 | LSHSDEKPYQCPVCQQR2000000000000000                | sp P56270 MAZ_HUMAN   |
| 5201 | VSEEQTPPSPAGAMSTAMGR20000000001000               | sp Q16666 IF16_HUMAN  |
| 5202 | STSAPQMSPGSSDNQSSSPQPAQQK2.000001E+25            | sp Q14157 UBP2L_HUMAN |
|      |                                                  | sp Q9Y4E1 FA21C_HUMAN |
| 5203 | SRPTSFADELAAR220000000000                        | sp Q641Q2 FA21A_HUMAN |
|      |                                                  | sp Q5SNT6 FA21B_HUMAN |
| 5204 | SLSPGKENVSALDMEK2000000000000000                 | sp Q9H307 PININ_HUMAN |
| 5205 | TSAVSSPLLDQQR2000000000                          | sp Q5T200 ZC3HD_HUMAN |
| 5206 | KADTEGKSPSHSSSNRPFTPPTSTGGSK2000020000000000     | sp Q15648 MED1_HUMAN  |
| 5207 | STSAPQMSPGSSDNQSSSPQPAQQK1.0000000022E+19        | sp Q14157 UBP2L_HUMAN |
| 5208 | TPSSSSTLAYSRL200000000000                        | sp Q6Q0C0 TRAF7_HUMAN |
| 5209 | HFEASCGQLSPAR20000                               | sp Q96N21 AP4AT_HUMAN |
| 5210 | VNPHKVPASSVDSNIPSSQGYK200220020000000000         | sp Q9UHB7 AFF4_HUMAN  |
| 5211 | QSGDGGESTEPVENK2000000000000000                  | sp 015234 CASC3_HUMAN |
| 5212 | EGSQGELTPANSQSR2000000000                        | sp Q13098 CSN1_HUMAN  |
| 5213 | LDSSEMDSSENYDTMSSPLPGK2.000020000001E+20         | sp Q9NTI5 PDS5B_HUMAN |
| 5214 | KPSGSPDLWK2000000000                             | sp Q96JM3 CHAP1_HUMAN |
| 5215 | LNQPGTPTR20000                                   | sp P36507 MP2K2_HUMAN |
| 5216 | TAATAAAAAAEPAPPPPPPEEDPEQDSGPEDLPLVR200000000000 | sp P06400 RB_HUMAN    |
| 5217 | RPPSPDIVLSDNEQPSSPR200000020000002000            | sp Q86YP4 P66A_HUMAN  |
| 5218 | TEARSSDEENGPPSSPDLDR220000000000000000           | sp Q96B36 AKTS1_HUMAN |
| 5219 | RGEADAPFSEPGTTSTQRPSPETATK220000000              | sp Q9UQ35 SRRM2_HUMAN |
| 5220 | ESGVVAVSPEKSESPQKEDGLSSQLK2.0002E+19             | sp Q96T58 MINT_HUMAN  |
| 5221 | SRDESASETSTPSEHSAAPSPQVEVR2.020222E+22           | sp Q92614 MY18A_HUMAN |
| 5222 | SVASSQPAKPTK20002000000000                       | sp Q07157 ZO1_HUMAN   |
| 5223 | LQSPLEPHSK2000000000                             | sp 015211 RGL2_HUMAN  |
| 5224 | FCDSPTSLEMR2002000000                            | sp 015014 ZN609_HUMAN |
| 5225 | HELSPQK200000                                    | sp Q9BXP5 SRRT_HUMAN  |
|      |                                                  | sp E9PAV3 NACAM_HUMAN |
| 5226 | VQGEAVSNIQENTQTPTVQEESEEEEEVDGTEVVK2E+23         | sp Q13765 NACA_HUMAN  |
|      |                                                  | sp Q68EM7 RHG17_HUMAN |
| 5227 | SPSPPTQHTGQPPGQPSAPLSAPR20000000000000000000     | sp Q8IX03 KIBRA_HUMAN |
| 5228 | ETNTETPAPSPTVVRPK20002000000000                  | sp Q92508 PIEZ1_HUMAN |
| 5229 | TASELLDR20000000                                 | sp P07948 LYN_HUMAN   |
| 5230 | GKDSLDDGVDLK2000000000                           | sp Q96AY4 TTC28_HUMAN |
| 5231 | SQSPVTVKPKPPAR200000000000000000                 | sp Q9Y4R8 TELO2_HUMAN |
| 5232 | TPQGSPSPNTPCLPEAAVSQPGSAVASDWR2E+24              | sp Q6Y7W6 PERQ2_HUMAN |
| 5233 | ALSSGGSITSPPLSPALPK20002000000                   | sp Q8NBJ9 SIDT2_HUMAN |
| 5234 | VDSMSSVEEDDYDTLTDIDSDKNVIR2.022E+24              | sp P02545 LMNA_HUMAN  |
| 5235 | LSPSPTSQR2000000000                              | sp Q9C0C2 TB182_HUMAN |
| 5236 | GSGGLFSPSTAHPDGAALGQR2E+20                       |                       |

|      |                                                     |                       |
|------|-----------------------------------------------------|-----------------------|
| 5237 | SSPNPFVGSPPK20000                                   | sp P98082 DAB2_HUMAN  |
| 5238 | KRSPSPSPTPEAK202000000000                           | sp Q8TAQ2 SMRC2_HUMAN |
| 5239 | KVVEAVNSDSDSEFGIPK202020000000                      | sp Q02880 TOP2B_HUMAN |
| 5240 | HSLSGSSPGMK20000000000                              | sp Q9UQ35 SRRM2_HUMAN |
| 5241 | RASPPDPSPSAASASER200000020000000000                 | sp Q9Y2F5 ICE1_HUMAN  |
| 5242 | KGSISSTQDTPVAVEEDCSLASSK2. 2E+20                    | sp Q9BZ71 PITM3_HUMAN |
| 5243 | SPGMLEPLGSSR2001000000000                           | sp Q9UQ35 SRRM2_HUMAN |
| 5244 | VAGGAAPSKPASAK2000                                  | sp Q14978 NOLC1_HUMAN |
| 5245 | ASASGSGAQVGGPISSGSSASSVTVTR22000000                 | sp P02545 LMNA_HUMAN  |
| 5246 | LQEEGGGSDDEETGSPSEDGMQ SAR200000000000000           | sp Q13610 PWP1_HUMAN  |
| 5247 | TSSKESPIPSPTSDRK22000200000000                      | sp Q01082 SPTB2_HUMAN |
| 5248 | SSSPTAGPSTEGAEGPEEK220000000000000000               | sp Q8NHM5 KDM2B_HUMAN |
| 5249 | SPAGPAATPAQAQAASPR2000000002000                     | sp Q13428 TCOF_HUMAN  |
| 5250 | MSHSSSDTDINEIHTNHK200000000000                      | sp P46100 ATRX_HUMAN  |
| 5251 | DTQSPSTCSEGLLGWSQK200000000000000000                | sp Q9C0C2 TB182_HUMAN |
| 5252 | TNLTSQSSTTNLPGSPGSPGSPGSPGSPGSPVK200200200000000000 | sp Q6IN85 P4R3A_HUMAN |
| 5253 | EDDDVIVNKPHVSDEEEEEPPFYHHPFK2000000000000000        | sp P18583 SON_HUMAN   |
| 5254 | SPQPVCSPAGSEGTK20000000002000000                    | sp Q6KC79 NIPBL_HUMAN |
| 5255 | EWYQSTIPQSPSPAPDDPEEGR2000000200000000000           | sp Q08499 PDE4D_HUMAN |
| 5256 | HGGSPQPLATTPLSQEPVNPPEASPTR2. 000002E+25            | sp Q9UQ35 SRRM2_HUMAN |
| 5257 | YYSIDDNQNK200000000                                 | sp Q8NI08 NCOA7_HUMAN |
| 5258 | LTVSDGESGEEK2000200000                              | sp P46100 ATRX_HUMAN  |
| 5259 | TSPPCSPANLSR200020000000                            | sp P49585 PCY1A_HUMAN |
| 5260 | TGSSSPGGPPKPGSQLDSMLGSLQSDLNK2E+26                  | sp P49023 PAXI_HUMAN  |
| 5261 | EQSEVSVSPR2000                                      | sp Q7L4I2 RSRC2_HUMAN |
| 5262 | SRSPSPELNK2020000000000                             | sp Q9UQ35 SRRM2_HUMAN |
| 5263 | LAGGQTSQPTTPLTSPQR2000020000                        | sp O95155 UBE4B_HUMAN |
| 5264 | NSLLAGDDDTMSVISGSSR12002002000                      | sp Q8N3U4 STAG2_HUMAN |
| 5265 | LLKPGEPESEYTDDEEDTKDHNK200000000000000              | sp O15173 PGRC2_HUMAN |
| 5266 | SGSSQELDVKPSASPQER20000000020000000                 | sp Q9UQ35 SRRM2_HUMAN |
| 5267 | RTSLGEVSK20000000                                   | sp Q9ULJ8 NEB1_HUMAN  |
| 5268 | HASSPESPKPAPAPGSHR20002000000000000                 | sp Q9UQ35 SRRM2_HUMAN |
| 5269 | DESASETSTPSEHSAAPSPQVEVR2. 020222E+22               | sp Q92614 MY18A_HUMAN |
| 5270 | VPDEEENEESDNEK200000                                | sp P11388 TOP2A_HUMAN |
| 5271 | FEPESPGFESR20000000                                 | sp Q9H5H4 ZN768_HUMAN |
| 5272 | VQIPVSRPDPPEVSDNEEDSYDEEIHDP23000000000             | sp Q07157 ZO1_HUMAN   |
| 5273 | SPSPLSGHVAQAFPTK20200000000000000                   | sp Q6P0Q8 MAST2_HUMAN |
| 5274 | HAPSLHGSTELLPLSR2000000200                          | sp Q9H5N1 RABE2_HUMAN |
| 5275 | AGTATSPAGSSPAVAGGTQ RPAEDSSSSEESDSEEEK2E+35         | sp Q13428 TCOF_HUMAN  |
| 5276 | SSDEENGPPSSPDLDR2000000022000000                    | sp Q96B36 AKTS1_HUMAN |
| 5277 | TKPTQAAGPSSPQKPPTPEETK2000002000000                 | sp P18887 XRCC1_HUMAN |
| 5278 | SLESVLSLGRPTGGGSSPPEIR2E+23                         | sp Q13470 TNK1_HUMAN  |
| 5279 | GTEPSPGGTPQPSRPVSPAGPPEGVPEEAQPPR2. 00000020002E+32 | sp Q8WUZO BCL7C_HUMAN |
| 5280 | SPPAPGLQPMR200000000100                             | sp P15408 FOSL2_HUMAN |
| 5281 | FPVPELSDQEGDSSSEED2000002220000                     | sp Q9BRX2 PELO_HUMAN  |
| 5282 | TSADAQEPASPVVSPQQSPPTSPTWR2000200020020000000       | sp Q96D71 REPS1_HUMAN |
| 5283 | DSDYVYPSLESDENPIFK2000000000                        | sp O75151 PHF2_HUMAN  |
| 5284 | VVDYSQFQESDDADEDYGRDSGPPTK20000000000000000         | sp Q9H1E3 NUCKS_HUMAN |
| 5285 | YTGEEDGAGGHSPAPPQTEECLR2000000000000                | sp O94762 RECQ5_HUMAN |
| 5286 | TNLTSQSSTTNLPGSPGSPGSPGSPGSPGSPVK200200200000000    | sp Q6IN85 P4R3A_HUMAN |
| 5287 | EPTPSIASDISLPIATQELR202000000000000000              | sp A0FGR8 ESYT2_HUMAN |
| 5288 | AFNLHLSSESEDETEHPVPIILSNEDGR2. 022000002E+24        | sp Q8IWU2 LMTK2_HUMAN |
| 5289 | VPKSPEHSAEPIR20000000000                            | sp Q9ULH0 KDIS_HUMAN  |
| 5290 | NSSPGEASLLEK20000000000                             | sp Q76FK4 NOL8_HUMAN  |

|      |                                                               |                       |
|------|---------------------------------------------------------------|-----------------------|
| 5291 | SVSPPPKR200000000                                             | sp Q13247 SRSF6_HUMAN |
| 5292 | ASSPSPLTIGTPESQR202000000000000                               | sp Q9NPI6 DCP1A_HUMAN |
| 5293 | NLNSNLFSVNR2000000000                                         | sp P52948 NUP98_HUMAN |
| 5294 | RSPSAPAATSSASSSTSSYK2E+19                                     | sp Q15345 LRC41_HUMAN |
| 5295 | LLPSVWSESEDGAGSPPPYR2000000                                   | sp Q9UIS9 MBD1_HUMAN  |
| 5296 | HSASPVVFTSAR2000002000                                        | sp O43166 SI1L1_HUMAN |
| 5297 | VVLGDGVQLPPGDYSTTPGGTLFSTTPGGTR3000000000020000000            | sp Q13541 4EBP1_HUMAN |
| 5298 | GLYDGPVCEVSVTPK2000                                           | sp Q16555 DPYL2_HUMAN |
| 5299 | VSPASPGP200020000                                             | sp Q9Y4U1 MMAC_HUMAN  |
| 5300 | EISPGSGPEIR20020000000                                        | sp O43491 E41L2_HUMAN |
| 5301 | LAELPAAQPSAEDSDTEDDSEAEQTER202000200000000                    | sp O95714 HERC2_HUMAN |
| 5302 | ALQAPHSPSK20000                                               | sp Q96AQ6 PBIP1_HUMAN |
| 5303 | RHSDPWGR2000000                                               | sp Q92576 PHF3_HUMAN  |
| 5304 | DGDSYDPYDFSDTEEMPQVHTPK200000100000000                        | sp P25205 MCM3_HUMAN  |
| 5305 | SDSASSEPVGIYQGF2002000000000000000                            | sp Q05655 KPCD_HUMAN  |
| 5306 | KAPAGQEEPPTSSPLSAEQQLDR2200000000000                          | sp P13051 UNG_HUMAN   |
| 5307 | NAPPGGDEPLAETESESEAEAGFSPVVDVK2.0202E+19                      | sp Q8NC44 F134A_HUMAN |
| 5308 | RKGSSEGEDEEGGER2020000000000000000                            | sp Q6PD62 CTR9_HUMAN  |
| 5309 | DGDSYDPYDFSDTEEMPQVHTPK3000000000000002000                    | sp P25205 MCM3_HUMAN  |
| 5310 | ISSSSF200000000                                               | sp P05787 K2C8_HUMAN  |
| 5311 | ESYTEEIVSEASHVSGISR200000000000000                            | sp Q5QJE6 TDIF2_HUMAN |
| 5312 | MLPHAPGVQQAIPEDAIPESGDEDEDDPKR1E+33                           | sp Q13547 HDAC1_HUMAN |
| 5313 | SPSSKPSLAVAVDSAPEVAVK2000000000000000000                      | sp O60508 PRP17_HUMAN |
| 5314 | TDCEPVGLEPAVEQSSAASELAEASSEELAEAPTEAPSPEAR2.0000000000002E+42 | sp Q15424 SAFB1_HUMAN |
| 5315 | SFSISPSR202020000                                             | sp Q14151 SAFB2_HUMAN |
| 5316 | LFEDDSDNEKLFDEEEDSSEKLFDDSDER2.000000000022E+23               | sp P18583 SON_HUMAN   |
| 5317 | GSQHSQEQPAPQPSGGDPSPPQER2000000                               | sp O43719 HTSF1_HUMAN |
| 5318 | SHTSEGAHLDITPNSGAAGNSAGPK2.2E+23                              | sp Q8WXE0 CSK12_HUMAN |
| 5319 | AASQGSPLLPAQR2000000000000000000                              | sp Q92597 NDRG1_HUMAN |
| 5320 | ETPAATEAPSSTPK2000                                            | sp Q5TCZ1 SPD2A_HUMAN |
| 5321 | YGSPQR200000                                                  | sp P80723 BASP1_HUMAN |
| 5322 | SITSTPLSGK20000002000                                         | sp O15234 CASC3_HUMAN |
| 5323 | AGSISTLDSLDFAR2022002000000                                   | sp Q9P0K7 RAI14_HUMAN |
| 5324 | SPSPAPPPR2000000000                                           | sp Q9P260 K1468_HUMAN |
| 5325 | TGSGSPFAGNSPAR20000                                           | sp Q8IYB3 SRRM1_HUMAN |
| 5326 | RQSVSPPYK20200000                                             | sp Q9UPT8 ZC3H4_HUMAN |
| 5327 | IVEPEVGEDSEVEGDWR2000000000                                   | sp Q9NYV4 CDK12_HUMAN |
| 5328 | ASPSQGSDERESLTR2000002000020000                               | sp P55081 MFAP1_HUMAN |
| 5329 | YSHSYLSDSDTEAK200000000                                       | sp P37275 ZEB1_HUMAN  |
| 5330 | KPSDSLVAASSR2000000000                                        | sp Q92614 MY18A_HUMAN |
| 5331 | NSCNVLHPQSPNNSNR20000000                                      | sp Q5T0W9 FA83B_HUMAN |
| 5332 | HVSPVTPPR20020000                                             | sp Q7Z333 SETX_HUMAN  |
| 5333 | SGSGISVISSTVDQR2000000000000000                               | sp Q13443 ADAM9_HUMAN |
| 5334 | HLSTPSSVSPEPQDSAK2000000000                                   | sp Q15811 ITSN1_HUMAN |
| 5335 | AIGGIILTASHNPGPNGDFGIK2000000000000000                        | sp Q9NZN5 ARHGC_HUMAN |
| 5336 | DGGSGNSTIIVSR20020000000                                      | sp P36871 PGM1_HUMAN  |
| 5337 | APSTSPSFEQTQETYTVAHEENVNR2000000000000000000                  | sp Q7Z6Z7 HUWE1_HUMAN |
| 5338 | TEFLHSQNSLSPR202000                                           | sp Q9BUT9 F195A_HUMAN |
| 5339 | TEPAEAEAAASGPSESPSPAEEELPGSHAEPVPAQGEAPGEQAR2E+29             | sp Q96FS4 SIPA1_HUMAN |
| 5340 | EVENEDDDDDSDKEK200000                                         | sp P55884 EIF3B_HUMAN |
| 5341 | SSSQRSPSPGNHTSNSSNASNATVVPQNSSAR2.02000002E+28                | sp Q9P287 BCCIP_HUMAN |
| 5342 | LHQLSGSDQLESTASHR200000000000000                              | sp Q9BTA9 WAC_HUMAN   |
| 5343 | SHSGTSPDNTAPPPPPRPQPSHSR2.02E+23                              | sp O60271 JIP4_HUMAN  |
|      |                                                               | sp Q96D71 REPS1_HUMAN |



|      |                                                   |           |             |
|------|---------------------------------------------------|-----------|-------------|
| 5344 | HKLTVSDGESGEEK2000200000                          | sp P46100 | ATRX_HUMAN  |
| 5345 | SSTPLPTISSAENTR200020000000000                    | sp P42166 | LAP2A_HUMAN |
| 5346 | RSSQPSPTAVPASDSPPTK202000000000000                | sp P42167 | LAP2B_HUMAN |
| 5347 | ALQSPALGLR20000000                                | sp Q3KQU3 | MA7D1_HUMAN |
| 5348 | SLSPLGGR202000000                                 | sp P46940 | IQGA1_HUMAN |
| 5349 | RASPSKPASAPASR200000000000000                     | sp Q14004 | CDK13_HUMAN |
| 5350 | SLESINSR200000000                                 | sp P27816 | MAP4_HUMAN  |
| 5351 | VSPAHSPPENGLDK200020000000000                     | sp P62888 | RL30_HUMAN  |
| 5352 | TLSTHSVPNISGATCSAFASPFGCPYSHR2. 2E+27             | sp Q04726 | TLE3_HUMAN  |
| 5353 | YSPTSPTYSPK200300000000                           | sp P28290 | SSFA2_HUMAN |
| 5354 | EPDATPPSPR2000                                    | sp P24928 | RPB1_HUMAN  |
| 5355 | SSPNPFVGSPPK200000020000                          | sp P28715 | ERCC5_HUMAN |
| 5356 | YSHSYLSDSDTEAK20000202000000                      | sp P98082 | DAB2_HUMAN  |
| 5357 | SAYQEYSDSDVPEELK20200000000                       | sp Q92614 | MY18A_HUMAN |
| 5358 | SPGTPRPPGASK2000000000000                         | sp Q96JG6 | CC132_HUMAN |
| 5359 | SPQLSLSPRASP200002000                             | sp Q9Y3X0 | CCDC9_HUMAN |
| 5360 | SLNLVDSQPILLEK200000000000000                     | sp 095785 | WIZ_HUMAN   |
| 5361 | ISQSQPVR20000000                                  | sp P46019 | KPB2_HUMAN  |
| 5362 | AQSSPASATFPVSVQEPPTKPR200000000000000             | sp 095071 | UBR5_HUMAN  |
| 5363 | GGLNTPHESDFSGVTPQR2000000000020000                | sp P56524 | HDAC4_HUMAN |
| 5364 | QEQINTEPLEDTVLSPTK20000                           | sp Q99459 | CDC5L_HUMAN |
| 5365 | HPEPVPEEGSEDELPPQVHK2000000000000                 | sp 015446 | RPA34_HUMAN |
| 5366 | KPIKSPSKDASSGK22000                               | sp Q7Z3C6 | ATG9A_HUMAN |
| 5367 | RHSHSHSPMSTR202020000000                          | sp Q13523 | PRP4B_HUMAN |
| 5368 | APSPTKPLR20000000                                 | sp P62995 | TRA2B_HUMAN |
| 5369 | NSGIWESPELDR2000000000000                         | sp Q96FF9 | CDC45_HUMAN |
| 5370 | SPTGPSNSFLANMGTVAHK20000100000000                 | sp 015085 | ARHGB_HUMAN |
| 5371 | LGSLAR200000                                      | sp Q96I25 | SPF45_HUMAN |
| 5372 | SQTPPGVATPPIPK200000000000000                     | sp Q5SW79 | CE170_HUMAN |
| 5373 | VQIPVSRPDPVSDNEEDSYDEEIHDP20000020000000000       | sp Q00G26 | PLIN5_HUMAN |
| 5374 | VQQEIDSDSPVAR200200000                            | sp Q15648 | MED1_HUMAN  |
| 5375 | KESKEETSIDVAGKPNEVTK2. 000002E+19                 | sp Q07157 | ZO1_HUMAN   |
| 5376 | SEACPCQPDGSPPLAEEEEK2000000000000                 | sp Q6T4R5 | NHS_HUMAN   |
| 5377 | GPGSPRTPPAPGPPSFEEQLR2. 0002E+19                  | sp P53985 | MOT1_HUMAN  |
| 5378 | SDHEDNDPSVDVQHSGSEAPNDDDEGHR2. 00000002000002E+29 | sp Q14160 | SCRIB_HUMAN |
| 5379 | TESFHSYR2000000                                   | sp Q6ZTN6 | AN13D_HUMAN |
| 5380 | SSFSQHAR20000000                                  | sp Q8WVC0 | LEO1_HUMAN  |
| 5381 | GGWDHGDQSIQSSR2000200                             | sp Q9Y597 | KCTD3_HUMAN |
| 5382 | SLNSVVTSEPKHSLLVGDFR2. 0020002000002E+21          | sp P02545 | LMNA_HUMAN  |
| 5383 | GGSTGGGGFDPPPAYHEVVDAEK2E+21                      | sp Q9P206 | K1522_HUMAN |
| 5384 | SGSTSSLSYSTWTSSHSDK20000000000000000              | sp Q04656 | ATP7A_HUMAN |
| 5385 | RGSQKSTDSPGADAELPESAAR2002000000000000000         | sp Q9UPU5 | UBP24_HUMAN |
| 5386 | NMTVEQLLTGSPSPTVEPEKPTR1. 000000000022E+23        | sp Q9ULD2 | MTUS1_HUMAN |
| 5387 | LTVENSPK2000                                      | sp Q9Y4K1 | AIM1_HUMAN  |
| 5388 | HKSGSMEEDVDTSPGGDYTSPSSPTSSSR1. 000000000003E+25  | sp Q9C0C9 | UBE20_HUMAN |
| 5389 | LASPSGSTSSGLEVVAPGTSAPGGGPGTLDDSATICR2. 0222E+34  | sp 043583 | DENR_HUMAN  |
| 5390 | GQGTTPSGPGVVR2000000000000                        | sp P08651 | NFIC_HUMAN  |
| 5391 | KKDELSDYAEK2000000                                | sp Q13263 | TIF1B_HUMAN |
| 5392 | SPQFINLK200000000                                 | sp Q9UMN6 | KMT2B_HUMAN |
| 5393 | LGSPVDNLEMDRDDLTDVSVFTR2E+22                      | sp P46100 | ATRX_HUMAN  |
| 5394 | QSGSPTLDTAPNGR2000000000000                       | sp Q92576 | PHF3_HUMAN  |
| 5395 | ASVALTPTAPSR200000000200                          | sp Q5VUA4 | ZN318_HUMAN |
|      |                                                   | sp Q9H2J7 | S6A15_HUMAN |
|      |                                                   | sp P28290 | SSFA2_HUMAN |

|      |                                                 |                       |
|------|-------------------------------------------------|-----------------------|
| 5396 | SVSASSGPCSPAAPHPPPPR2. 02002E+21                | sp Q86UY5 FA83A_HUMAN |
| 5397 | RGTGQSDSDIWDITALIK200200200000000000            | sp Q16637 SMN_HUMAN   |
| 5398 | APQTSSSPPPVR22000000                            | sp Q8IYB3 SRRM1_HUMAN |
| 5399 | TPAPPEPGSPAPGEGPSGR200000000000                 | sp P0C1Z6 TFPT_HUMAN  |
| 5400 | SGSPSDNSGAEEMEVSLAKPK200200000000000000         | sp P31749 AKT1_HUMAN  |
| 5401 | SAGGSSPEGGEDSDREDGNYCPPVK2. 0000002E+20         | sp Q9H6Z4 RANB3_HUMAN |
| 5402 | LTPVSLNSPIK20000                                | sp P46100 ATRX_HUMAN  |
| 5403 | ESSPIPSPTSDR20002000000                         | sp Q01082 SPTB2_HUMAN |
| 5404 | KGSPTPGFSTR2000000000                           | sp Q6ZRV2 FA83H_HUMAN |
| 5405 | SSPPLRTPDVLESSGPAVR2. 200002E+19                | sp 075676 KS6A4_HUMAN |
| 5406 | SPGSTPTTPTSSQAPQK2000000                        | sp P35658 NU214_HUMAN |
| 5407 | LQTTDNLPMSPPEEFDEVSR20000000000                 | sp P42224 STAT1_HUMAN |
| 5408 | IESDTEETQDTSVDHNETGNTGESSVEENEK2002002000000000 | sp Q6PL18 ATAD2_HUMAN |
| 5409 | VPGEQGSDEEHCK20000000                           | sp Q9UNS1 TIM_HUMAN   |
|      |                                                 | sp Q641Q2 FA21A_HUMAN |
| 5410 | SRPTSFADLAAR20002000000000                      | sp Q5SNT6 FA21B_HUMAN |
|      |                                                 | sp Q9Y4E1 FA21C_HUMAN |
| 5411 | SKPSPQKQALGDGIAPPQK200000000000000000           | sp Q9H9J4 UBP42_HUMAN |
| 5412 | SYQNSPSSDDGIRPLPEYSTEK202000000000000000        | sp Q15648 MED1_HUMAN  |
| 5413 | ALSSGGSITSPPLSPALPK20000000000                  | sp Q6Y7W6 PERQ2_HUMAN |
| 5414 | SPTKAPHLQLIEGK2000000000000                     | sp 043491 E41L2_HUMAN |
| 5415 | QGSITSPQANEQSVTPQR200200000000000000            | sp Q9UQ35 SRRM2_HUMAN |
| 5416 | GFSVVADTPELQR2000000                            | sp Q14847 LASP1_HUMAN |
| 5417 | RQSSGSATNVASTPDNR20000000000                    | sp Q7Z460 CLAP1_HUMAN |
| 5418 | LEPVYSPGSPPGDPR20002000000000                   | sp 075676 KS6A4_HUMAN |
| 5419 | GVGSEPGPTAPYLGR20000000000000                   | sp Q9C0B5 ZDHC5_HUMAN |
| 5420 | HSVTAATPPPSPTSGESDLSNLLQSPSSAK2. 002E+19        | sp Q96QU8 XPO6_HUMAN  |
| 5421 | TSAQHALTSVSRGSSLK20020000                       | sp P61073 CXCR4_HUMAN |
| 5422 | TEEPLGSPHSGTVESPGEGPQDTR2. 000000002E+19        | sp Q9NWS9 ZN446_HUMAN |
| 5423 | RRSPSPAPPPR2020000000                           | sp Q8IYB3 SRRM1_HUMAN |
| 5424 | GDTVSAAPCSAPLAR20000000000                      | sp Q15477 SKIV2_HUMAN |
| 5425 | NYQQNYQNSESGEKNESSESAPEGQAQQR2. 000000002E+19   | sp P67809 YBOX1_HUMAN |
| 5426 | GPSQEEEDNHSDEEDR2000000                         | sp Q86VM9 ZCH18_HUMAN |
| 5427 | ATPATAPGTSPR2000                                | sp Q96P47 AGAP3_HUMAN |
| 5428 | LASPSGSTSSGLEVVAVEGTSAPGGPGTLDDSATICR2. 02E+34  | sp Q13263 TIF1B_HUMAN |
| 5429 | LSPSPTSQR2000000                                | sp P02545 LMNA_HUMAN  |
| 5430 | RGSSGSVDETLFALPAASEPVIR200020000000000000       | sp Q9NQC3 RTN4_HUMAN  |
| 5431 | RRSDGVDGFEAEGK2000000000000                     | sp Q96KR1 ZFR_HUMAN   |
| 5432 | ALSSGGSITSPPLSPALPK200000000000000000           | sp Q6Y7W6 PERQ2_HUMAN |
|      |                                                 | sp A4D2H0 CTGEF_HUMAN |
|      |                                                 | sp Q86UF2 CTGE6_HUMAN |
| 5433 | SNSELEDEILCLEK20000000000000                    | sp 015320 CTGE5_HUMAN |
|      |                                                 | sp P0CG41 CTGE8_HUMAN |
|      |                                                 | sp A4FU28 CTGE9_HUMAN |
|      |                                                 | sp Q8IX94 CTGE4_HUMAN |
| 5434 | LSPSPTSQR202000000                              | sp P02545 LMNA_HUMAN  |
| 5435 | QEAKPQQAAGMLSPK2000                             | sp Q13428 TCOF_HUMAN  |
| 5436 | ESASPTIPNLDLLEAHTK200000000000000000            | sp 075151 PHF2_HUMAN  |
| 5437 | TPLDLFAHFGPEPGDHSPLPPSAPSPTR20000               | sp Q8N1G0 ZN687_HUMAN |
| 5438 | NQSPTEAEKPASSSLPSSPPPQLLTR2E+24                 | sp Q99567 NUP88_HUMAN |
| 5439 | SQTPPGVATPPIPK200000002000000                   | sp Q15648 MED1_HUMAN  |
| 5440 | EPTSSENEGISTIPSPVTSPLSR20020000000              | sp Q8NEL9 DDHD1_HUMAN |
| 5441 | ANSPSLFGTEGKPK2000000000000                     | sp Q96B97 SH3K1_HUMAN |
| 5442 | KEDDSSQSTCVVDTTTR2202200000000000               | sp Q5SNT2 TM201_HUMAN |

|      |                                                   |                       |
|------|---------------------------------------------------|-----------------------|
| 5443 | SKDASPINR2000200000                               | sp Q13523 PRP4B_HUMAN |
| 5444 | SKTPSSPCASK20020000000                            | sp Q9NQS7 INCE_HUMAN  |
| 5445 | LCDFGSASHVADNDITPYLVS200                          | sp Q13523 PRP4B_HUMAN |
| 5446 | SPISDNSGCDAPGNSNPSLSPSSAESEK2.002E+29             | sp Q99590 SCAFB_HUMAN |
| 5447 | RPDHSGGSPSPPTSEPAR200200002000000                 | sp Q8TAD8 SNIP1_HUMAN |
| 5448 | AFKPEETSSNSDPPSPVVLNNSHPVPR2000200000000000000    | sp 060293 ZC3H1_HUMAN |
| 5449 | TSQVGAASAPAKESPRK20000                            | sp Q13428 TCOF_HUMAN  |
| 5450 | HSDSGTSEASLSPSSPPSRPR220000000                    | sp Q7Z4S6 KI21A_HUMAN |
| 5451 | IIPLEEGLQLPSPTATSQPLESDAVECLNYQHYK2E+19           | sp P61978 HNRPK_HUMAN |
| 5452 | GSISLNSSPR20002000                                | sp Q9NYL2 MLTK_HUMAN  |
| 5453 | SPQRSPLQSAESSPTAGK2000200000022000000             | sp Q8IWB9 TEX2_HUMAN  |
| 5454 | LLKPGEEPSEYTDEEDTKDHNK3200000000000               | sp 015173 PGRC2_HUMAN |
|      |                                                   | sp P05534 1A24_HUMAN  |
|      |                                                   | sp P30447 1A23_HUMAN  |
| 5455 | GGSYSQAASSDSAQGSVSLTACK20000000000000000          | sp P01891 1A68_HUMAN  |
|      |                                                   | sp P01892 1A02_HUMAN  |
|      |                                                   | sp Q09160 1A80_HUMAN  |
|      |                                                   | sp P10316 1A69_HUMAN  |
| 5456 | RDSLTTGSSDLYK20000000000                          | sp Q14671 PUM1_HUMAN  |
| 5457 | IIPELVGSPTQSTSSR2000000000                        | sp Q9NSI6 BRWD1_HUMAN |
| 5458 | DSGHGSTSVDSEGFSDPDTGSHCSSEYAASSPGDR200000         | sp P54278 PMS2_HUMAN  |
| 5459 | NSSLGSPSNLCGSPGIR202000020000000                  | sp Q9C0B0 UNK_HUMAN   |
| 5460 | QEEGADASEEDPTPAGEEDVK2000000000000000             | sp Q86X53 ERIC1_HUMAN |
| 5461 | GRDSYGGPPR20000000                                | sp P38159 RBMX_HUMAN  |
|      |                                                   | sp Q96E39 RMXL1_HUMAN |
| 5462 | ASSFSGISILTR200000000000                          | sp Q9Y2K5 R3HD2_HUMAN |
| 5463 | LISDSVER20000                                     | sp Q5T200 ZC3HD_HUMAN |
| 5464 | GTEPSPGGTPQPSRPVSPAGPPEGVPEEAQPPR2.0020002E+32    | sp Q8WUZ0 BCL7C_HUMAN |
| 5465 | LEEPINEETPSQDEEEGVSDVESER20002000                 | sp Q9BYW2 SETD2_HUMAN |
| 5466 | YQEDSDPERSDYEEQQLQK2000020000000000               | sp Q6P6C2 ALKB5_HUMAN |
| 5467 | VISDESSEDIIGSDVEFKPDTK2000000000000000000         | sp P52701 MSH6_HUMAN  |
| 5468 | YLEEDNSDESDAEGEHGDGAEIEAPPAGPRPGPEPAGLGR2.002E+34 | sp Q9H1C4 UN93B_HUMAN |
| 5469 | AKPPADPAAAAASPCR20000                             | sp Q9GZT9 EGLN1_HUMAN |
| 5470 | HFSTLKDDDLVEFSDLESEDDERPR2000200000000            | sp Q9HCK8 CHD8_HUMAN  |
| 5471 | DNSPEPNDPEEPQEVSSTPSDKK2E+21                      | sp Q9HB58 SP110_HUMAN |
| 5472 | EEQTDTSDGESVTHHIR2000000000000                    | sp P36915 GNL1_HUMAN  |
| 5473 | ETVQTTQSPTPVEK20000000                            | sp Q9UPN6 SCAF8_HUMAN |
| 5474 | SLLDASEEAIKK2000000000000                         | sp P18206 VINC_HUMAN  |
| 5475 | HSTENDSPTNVQQ20000000                             | sp P49354 FNTA_HUMAN  |
| 5476 | QPTPPFFGR20000000                                 | sp Q96PK6 RBM14_HUMAN |
| 5477 | AQVLATIHGHAGAFPAAGDAGEGAPGGGSSPER20000            | sp Q86WR7 PRSR2_HUMAN |
| 5478 | SVSASSGPCSPAAPHPPPPR2.0000002E+19                 | sp Q86UY5 FA83A_HUMAN |
| 5479 | SGFGEISSPVIR2000002000000                         | sp P57740 NU107_HUMAN |
| 5480 | NLATSADTPPSTVPGTGK2000000000000000                | sp Q96Q15 SMG1_HUMAN  |
| 5481 | EAEQAASEAAGDTPGSSPSSLYEEPLGQPPR220000000000000    | sp Q86TC9 MYPN_HUMAN  |
| 5482 | LQLATLEAGPGAAGAGSE200                             | sp C9JI98 TM238_HUMAN |
| 5483 | APSTSPSFEQTQETYTVAHEENVR2.2E+21                   | sp Q9BUT9 F195A_HUMAN |
| 5484 | RSDSLLSFR2002000                                  | sp Q00587 BORG5_HUMAN |
| 5485 | VSPAPGSAPETPEDK2000000000                         | sp Q13459 MYO9B_HUMAN |
| 5486 | SLNSVVTSEPDKHSLLVGDFR2.0020002E+21                | sp Q04656 ATP7A_HUMAN |
| 5487 | KLSNSSSVSPLILSSNLPVNNK2E+21                       | sp Q9BVC5 ASHWN_HUMAN |
| 5488 | GSISSTSEVHSPNVGLR22000000000000                   | sp Q8WWQ0 PHIP_HUMAN  |
| 5489 | VSGVDGYETEGIR2000000000000                        | sp Q14566 MCM6_HUMAN  |

|      |                                               |                       |
|------|-----------------------------------------------|-----------------------|
| 5490 | SYDVPPPPMEPDHPFYSNISK2E+21                    | sp P18669 PGAM1_HUMAN |
| 5491 | LSPERSSDESSENEPHLPHGVSQR2.000220002E+24       | sp Q8N0Y7 PGAM4_HUMAN |
| 5492 | IISPGSSTPSSTR2000000                          | sp Q9BQ52 RNZ2_HUMAN  |
| 5493 | SVELDLNQAHEETPK2000000000000000               | sp Q5VT52 RPRD2_HUMAN |
| 5494 | NSTELAPPLPVR20000000000                       | sp Q14680 MELK_HUMAN  |
| 5495 | HGTPDPSPR20002000                             | sp Q9H7D0 DOCK5_HUMAN |
| 5496 | QQSQAASSSVTSPIK20000                          | sp Q9BRD0 BUD13_HUMAN |
| 5497 | FIHQQPQSSSPVYGSSAK2000000000                  | sp O60583 CCNT2_HUMAN |
| 5498 | SDSVLPASHGHLPGAGSLER20000                     | sp P49023 PAXI_HUMAN  |
| 5499 | SHMSGSPGPGSNTAPSTPVIGGSDKPGMEEK2E+29          | sp Q8N4C8 MINK1_HUMAN |
| 5500 | GDDLGAQDGVSSPAASPGHVVR200020000000            | sp A0FGR8 ESYT2_HUMAN |
| 5501 | SGSSSPDSEITELK200020000000000                 | sp Q86X02 CDR2L_HUMAN |
| 5502 | RPPKSPEEEGQMSS20000000020                     | sp P17812 PYRG1_HUMAN |
| 5503 | RREEGPPPPSPDGASSDAEPEPPSGR200000200000000000  | sp Q9BRL6 SRSF8_HUMAN |
| 5504 | ISLSDMPR20000000                              | sp Q9NTJ3 SMC4_HUMAN  |
| 5505 | HSSISPVRLPLNSSLGAELSR2.02E+19                 | sp Q9ULU4 PKCB1_HUMAN |
| 5506 | KLENSPLGEALR200000000                         | sp Q9NYV4 CDK12_HUMAN |
| 5507 | HKSGSMEEDVDTSPGGDYTSPSSPTSSSR33000020000000   | sp Q9NX40 OCAD1_HUMAN |
| 5508 | HQASDSENEELPKPR20000000000                    | sp P08651 NFIC_HUMAN  |
| 5509 | SQSSDTEQQSPTSGGGK20002000000000               | sp Q96ST2 IWS1_HUMAN  |
| 5510 | ASVALTPTAPSR200000                            | sp P23588 IF4B_HUMAN  |
| 5511 | SPSPPTQHTGPPGQPSAPQLSAPR2.002E+24             | sp P28290 SSFA2_HUMAN |
| 5512 | TNKSPEAKPLPGK20000000000                      | sp Q68EM7 RHG17_HUMAN |
| 5513 | NMPGLSAATLASLGGTSSR200                        | sp P46087 NOP2_HUMAN  |
| 5514 | MAPTPIPTRSPSDSSTASTPVAEQIER200000000000000000 | sp Q32MZ4 LRRF1_HUMAN |
| 5515 | VSSPLSPLSPGIK200200000                        | sp Q16643 DREB_HUMAN  |
| 5516 | LTQAEISEQPTMATVVPQVPTSPK20000                 | sp Q9P2B4 CT2NL_HUMAN |
| 5517 | ARNSGTQSDGEEKQPLVMER2020000000000000000       | sp Q70E73 RAPH1_HUMAN |
| 5518 | GLMAGGRPEGQYSEDEDTDDEYK30000020000000         | sp Q6P1M3 L2GL2_HUMAN |
| 5519 | SSTPSSPTGTSSSDSGHHIGWGER2.2E+21               | sp Q9NPQ8 RTC8A_HUMAN |
| 5520 | TNSGGGDGPHISSK2000000000000                   | sp P46019 KPB2_HUMAN  |
| 5521 | ECLTGESESSSEDEFEK200202020000000              | sp Q96EV2 RBM33_HUMAN |
| 5522 | YSPPAISPLVSEK30000020000000                   | sp Q56P03 EAPP_HUMAN  |
| 5523 | NFIGNSNHGSQSPR2000                            | sp Q14694 UBP10_HUMAN |
| 5524 | REPESPPASAPIPLFGADTIGQR2000000000000000       | sp Q03112 EVI1_HUMAN  |
| 5525 | ATTPPNQGRPDSPVYANLQELK2.000000002E+20         | sp Q96AY4 TTC28_HUMAN |
| 5526 | HGTDLWIDNMSSAVPNHSPEKK200000                  | sp Q8IWW6 RHG12_HUMAN |
| 5527 | IFDEVMGCFSDSPQSPTFPEAGHTSLYDEDKVR2.0002E+24   | sp Q8N6H7 ARFG2_HUMAN |
| 5528 | RPACDPEPGESGSSSDEGCTVVRPEK222000000000000     | sp Q13085 ACACA_HUMAN |
| 5529 | GGDSIGETPTPGASK202000000                      | sp O15541 R113A_HUMAN |
| 5530 | GGRSPDEVTLTSIVPTR2000000000                   | sp O75533 SF3B1_HUMAN |
| 5531 | MLPHAPGVQMQAIPEDAVHEDSGDEDGEDPDKR1E+33        | sp Q9UKS6 PACN3_HUMAN |
| 5532 | ATSSSNPSSPAPDWYK2000200000000                 | sp Q92769 HDAC2_HUMAN |
| 5533 | LPSPTSPFSSLSQDQAATSK200000000000              | sp P46100 ATRX_HUMAN  |
| 5534 | SSPSARPPDVPQQPQAAKSPSPVQGK2E+24               | sp Q8WWI1 LMO7_HUMAN  |
| 5535 | TEARSSDEENGPPSSPDLDR22000000022000000         | sp Q96JP5 ZFP91_HUMAN |
| 5536 | WSGNEPTDEFSDLPLR2000000000000000              | sp Q96B36 AKTS1_HUMAN |
| 5537 | SLSSSPQAQPPRPAELSDEEVAELFQR2.2E+24            | sp Q96II8 LRCH3_HUMAN |
| 5538 | QEISRLQK200000                                | sp Q4V328 GRAP1_HUMAN |
| 5539 | RGSSGSVDETLFALPAASEPVIR2.002E+21              | sp Q5TB80 CE162_HUMAN |
| 5540 | SRTPLISR202000000                             | sp Q9NQC3 RTN4_HUMAN  |
| 5541 | APYQENDGYCPDLELSDSEAESDGNK202000000000        | sp Q9UQ35 SRRM2_HUMAN |
| 5542 | GSRPPLILQSLSLPCSSPR200002000                  | sp Q92613 JADE3_HUMAN |
|      |                                               | sp Q6KC79 NIPBL_HUMAN |

|      |                                                   |                       |
|------|---------------------------------------------------|-----------------------|
| 5543 | ASDPGLPAEEP200000000000                           | sp P27708 PYR1_HUMAN  |
| 5544 | SGSETPDGLSPGK200000020000                         | sp Q8IWI9 MGAP_HUMAN  |
| 5545 | SGSSQELDVKPSASPQER2000000000000000                | sp Q9UQ35 SRRM2_HUMAN |
| 5546 | DGQDAIAQSPEK20000                                 | sp Q9NWH9 SLTM_HUMAN  |
| 5547 | TPTPSTPGDTQNPAPVPPAEDGIK2E+26                     | sp Q14839 CHD4_HUMAN  |
| 5548 | SLSSSIGSNSTYLTSK2200000000000000                  | sp Q86SQ4 GP126_HUMAN |
| 5549 | SFNYSPTSSTSEVSSTSASK200000000000                  | sp Q5VT52 RPRD2_HUMAN |
| 5550 | YSPTSPTYSPTSPK2000000002000                       | sp P24928 RPB1_HUMAN  |
| 5551 | RPTETNPVTSNSDEECNETVK200000020000000000           | sp P46100 ATRX_HUMAN  |
| 5552 | SASPYPHSLSSPQR2020000000000000                    | sp Q5T200 ZC3HD_HUMAN |
| 5553 | DAEPPSPTAGPPR2000000000                           | sp O43306 ADCY6_HUMAN |
| 5554 | SPSGPVKSPPLSPVGTTPVK2.0000002E+20                 | sp Q9BVC5 ASHWN_HUMAN |
| 5555 | GGPTSHSPVPPASSPSPLSGSALCGGK20200000000000         | sp P49848 TAF6_HUMAN  |
| 5556 | APSPVVEHPR200000000                               | sp Q86WR7 PRSR2_HUMAN |
| 5557 | ASSPSPLTIGTPESQR20000000000000                    | sp Q9NPI6 DCP1A_HUMAN |
| 5558 | LSSDLTR2000000                                    | sp Q7Z6E9 RBBP6_HUMAN |
| 5559 | AHASLMSGR20000                                    | sp Q14207 NPAT_HUMAN  |
| 5560 | ILDNPTEGAPVLSPPADVSTFLAFPSPEK20000000000000000000 | sp P46060 RAGP1_HUMAN |
| 5561 | ASVSQTSQASASSPR2000                               | sp Q8TDY2 RBCC1_HUMAN |
| 5562 | NPSSSTLPGGGVQNPADR20000000000000000000            | sp Q9UJY4 GGA2_HUMAN  |
| 5563 | TKPTQAAGPSSPKPPTPEETK20000000000000               | sp P18887 XRCC1_HUMAN |
| 5564 | LSTSDPEEGDPLALGPESPGEPQPPQLK2.2E+26               | sp Q5T1M5 FKB15_HUMAN |
| 5565 | ERPISLGFPLPAGDGLLTPDAQK2000000                    | sp O60271 JIP4_HUMAN  |
| 5566 | IVVGSVAPGNTAPSPSSPTSPTSATTSMLENNPHAI2.2E+36       | sp P49757 NUMB_HUMAN  |
| 5567 | LSTTPSPTSSLHEDGVEDFR2.00000002E+19                | sp O94842 TOX4_HUMAN  |
| 5568 | ESSPEKEAEEGCEK20000000000000                      | sp O43719 HTSF1_HUMAN |
| 5569 | NSPTPATSTESLSPLHNVALR20020000000000000000         | sp Q7Z6B7 SRGP1_HUMAN |
| 5570 | HNDIVSDSDAEDRGTLAELTAAHFGGGGGLLHK2.0000002E+27    | sp P78316 NOP14_HUMAN |
| 5571 | GSSDGRGSDSEDLPHR22000000000000000000              | sp Q9UPQ0 LIMC1_HUMAN |
| 5572 | SNTENLSQHFR2000000000                             | sp Q9UHB6 LIMA1_HUMAN |
| 5573 | GRSGSAAQAEGLCK20200000000000                      | sp Q92685 ALG3_HUMAN  |
| 5574 | SEDGYHSDGDYGEHDYR20000020000000000000             | sp P52756 RBM5_HUMAN  |
| 5575 | KQSFDDNDSELEDK20000000                            | sp O60841 IF2P_HUMAN  |
| 5576 | RQSSGSATNVASTPDNR200000000000000000               | sp Q7Z460 CLAP1_HUMAN |
| 5577 | LGSSGLGSASSIQA AVR20020000000                     | sp Q7Z6Z7 HUWE1_HUMAN |
| 5578 | SPHQLLSPSSFSPSATPSQK2020000000000000              | sp Q14181 DPOA2_HUMAN |
| 5579 | DLLSDLQDISDSER202000                              | sp P21127 CD11B_HUMAN |
| 5580 | SCPELTSGPR200000000000                            | sp Q9UQ88 CD11A_HUMAN |
|      |                                                   | sp Q13111 CAF1A_HUMAN |
|      |                                                   | sp P60709 ACTB_HUMAN  |
|      |                                                   | sp P63261 ACTG_HUMAN  |
|      |                                                   | sp P62736 ACTA_HUMAN  |
|      |                                                   | sp P63267 ACTH_HUMAN  |
|      |                                                   | sp P68032 ACTC_HUMAN  |
| 5581 | SYELPDGQVITIGNER20000000000000000000              | sp P68133 ACTS_HUMAN  |
|      |                                                   | sp Q6S8J3 POTEE_HUMAN |
|      |                                                   | sp A5A3E0 POTEF_HUMAN |
|      |                                                   | sp Q9BYX7 ACTBM_HUMAN |
|      |                                                   | sp Q562R1 ACTBL_HUMAN |
| 5582 | TLLAMQAALLGSSSEEELESEN1.000000222E+19             | sp P28715 ERCC5_HUMAN |
| 5583 | SLSMDSQVPVYSPSIDLK20000000000000000000            | sp Q9ULJ3 ZBT21_HUMAN |
| 5584 | RNPSSSTLPGGGVQNPADR20000000000000000000           | sp Q9UJY4 GGA2_HUMAN  |
| 5585 | RPSSTSVPLGDK20000000                              | sp Q9NXR1 NDE1_HUMAN  |

|      |                                                    |                       |
|------|----------------------------------------------------|-----------------------|
| 5586 | TDHGAEIVYKSPVVSGDTSR200020020000                   | sp P10636 TAU_HUMAN   |
|      |                                                    | sp TAU_HUMAN          |
| 5587 | LSQSSQDSSPVR200000000000                           | sp 095251 KAT7_HUMAN  |
| 5588 | KNSTGSGHSAQELPTIR200000000000                      | sp 094763 RMP_HUMAN   |
| 5589 | NMPGLSAATLASLGGTSSR100000000000000000              | sp Q32MZ4 LRRF1_HUMAN |
| 5590 | GSEGYLAATYPTVGGTSPR2000                            | sp P21359 NF1_HUMAN   |
| 5591 | FSEMMNMGDEDVDLPEVDGADDDSDSDEK1.1E+30               | sp Q15185 TEBP_HUMAN  |
| 5592 | SISSTVQR200000000                                  | sp Q6PJF5 RHDF2_HUMAN |
| 5593 | STFSTNYR200000000                                  | sp P05783 K1C18_HUMAN |
| 5594 | DDSDDESQSSHTGK200000000000                         | sp 094874 UFL1_HUMAN  |
| 5595 | YFQSPSR20200                                       | sp Q16629 SRSF7_HUMAN |
| 5596 | RQSPLPPQK20000000                                  | sp Q01105 SET_HUMAN   |
| 5597 | KPSPSESPKPFPAVSPEPR202000000000200000              | sp Q96JM3 CHAP1_HUMAN |
| 5598 | IQSSLSVNSDISKK2002000000                           | sp Q9P1T7 MDFIC_HUMAN |
| 5599 | IDENSDKEMEVEESPEK20001000020000                    | sp Q8N3X1 FNBP4_HUMAN |
| 5600 | KRSPSPPTPEAK200000200000                           | sp Q8TAQ2 SMRC2_HUMAN |
| 5601 | EDKSPSEESAPTTSPESVSGVSSGSSGR2.02E+27               | sp P54725 RD23A_HUMAN |
| 5602 | VPSPTPAK20000000                                   | sp Q9UQ35 SRRM2_HUMAN |
| 5603 | ESPSPAPKPR2000000000                               | sp Q8IYB3 SRRM1_HUMAN |
| 5604 | KHSEEAFTPLKCSPK200000000002000                     | sp Q3B726 RPA43_HUMAN |
| 5605 | GQGESDPLDHEPAVSPLLPR2000000                        | sp P00519 ABL1_HUMAN  |
| 5606 | SATPVNCEQPDILVSSTPINEGQTVLDK2.02E+28               | sp P82094 TMF1_HUMAN  |
| 5607 | IISPGSSTPSSSTR200000000000                         | sp Q5VT52 RPRD2_HUMAN |
| 5608 | VQIPVSRPDPVSDNEEDSYDEEIHDP2000000000000000         | sp Q07157 ZO1_HUMAN   |
| 5609 | TASSDSEEDPEALEK222020000000000                     | sp Q8N9T8 KRI1_HUMAN  |
| 5610 | NLVSPAYCTQESR20000000200                           | sp Q9NUQ3 TXLNG_HUMAN |
| 5611 | SIDAVIATASAPPSSSPGR20000                           | sp Q9NR48 ASH1L_HUMAN |
| 5612 | AALGLQSDDEDAAVDIDEQIESMFNSK2E+21                   | sp Q7L014 DDX46_HUMAN |
| 5613 | VQRPPSAASAAPSSSK200000000000                       | sp Q5SRE5 NU188_HUMAN |
| 5614 | KSASSESEANLEAQPQSTVRPEEIPPIPENR2.202E+29           | sp Q13427 PPIG_HUMAN  |
| 5615 | SELSQDAEPAGSQETK200000                             | sp Q9BVJ6 UT14A_HUMAN |
| 5616 | KPIDSLRDSR2000200                                  | sp Q9UQ35 SRRM2_HUMAN |
| 5617 | GRLTPSPDIIVLSDNEASSPR2020000002000000000           | sp Q8WXI9 P66B_HUMAN  |
| 5618 | ASPEPPGPESSSR2000000000000                         | sp Q9COC2 TB182_HUMAN |
| 5619 | KPGDGEVSPSTEDAPFQHSPLGK2000000000000000            | sp 060318 GANP_HUMAN  |
| 5620 | INHTVILDDPFDDPPDLLIPDRSPEPTR2000000                | sp Q8WUA2 PPIL4_HUMAN |
| 5621 | DEEEEKEVENEDDDSDKEK200000                          | sp Q9P287 BCCIP_HUMAN |
| 5622 | HKSESPCESYPNEK2020000000000                        | sp Q8NI27 THOC2_HUMAN |
| 5623 | GRSPQPPAEEDDFDDTLVAIDTYNCDLHFK2E+30                | sp Q9BUJ2 HNRL1_HUMAN |
| 5624 | SSATSGDIWPLSAYDNSR2000000000002000                 | sp Q9NYF8 BCLF1_HUMAN |
| 5625 | FDHESPGTDEDK2200200000                             | sp Q13427 PPIG_HUMAN  |
| 5626 | RSSLSSHSHQSQIYR2202000000000                       | sp 015027 SC16A_HUMAN |
| 5627 | ARESSDSEEEYKK22020000000                           | sp Q9BYW2 SETD2_HUMAN |
| 5628 | EKSPVREPVDNLSPEER2000000000000000                  | sp Q86U06 RBM23_HUMAN |
| 5629 | TPHYGSQTPLHDGSR2000020000000000                    | sp 000267 SPT5H_HUMAN |
| 5630 | NTPSQHSHSIQHSPER20000000020000                     | sp Q9NYF8 BCLF1_HUMAN |
| 5631 | RLSSLRASTSK2200020000                              | sp P62753 RS6_HUMAN   |
| 5632 | GSTLDLSDLEAEK200000000000                          | sp 000767 ACOD_HUMAN  |
| 5633 | WSSGVGGSGGGSSGR2000000000                          | sp 095071 UBR5_HUMAN  |
| 5634 | IFDEVMGCFSDSPQSPFPPEAGHTSLYDEDKVPR1.0000020002E+30 | sp Q13085 ACACA_HUMAN |
| 5635 | SERGEVSGLMR200000000100                            | sp Q13263 TIF1B_HUMAN |
| 5636 | TESPPSPSSDVEDAR2000020020000000                    | sp Q9BRK4 LZTS2_HUMAN |

|      |                                                  |                       |
|------|--------------------------------------------------|-----------------------|
|      |                                                  | sp A5A3E0 POTEF_HUMAN |
|      |                                                  | sp Q6S8J3 POTEE_HUMAN |
|      |                                                  | sp P68133 ACTS_HUMAN  |
|      |                                                  | sp Q562R1 ACTBL_HUMAN |
| 5637 | SYELPDGQVITIGNER2000000000000000                 | sp Q9BYX7 ACTBM_HUMAN |
|      |                                                  | sp P60709 ACTB_HUMAN  |
|      |                                                  | sp P62736 ACTA_HUMAN  |
|      |                                                  | sp P63261 ACTG_HUMAN  |
|      |                                                  | sp P63267 ACTH_HUMAN  |
|      |                                                  | sp P68032 ACTC_HUMAN  |
| 5638 | TDSEKPFRRGSQSPK202000                            | sp Q9Y2W1 TR150_HUMAN |
| 5639 | SPQTLAPVGEDAMK200000000000100                    | sp Q92797 SYMPK_HUMAN |
| 5640 | GQSSPPPAPPICLR200000000000                       | sp O43379 WDR62_HUMAN |
| 5641 | LSGGLGAGSCR200000000000                          | sp Q04695 K1C17_HUMAN |
| 5642 | SISTSGPLDKEDTGR2000000000000000                  | sp Q7Z401 MYCPP_HUMAN |
| 5643 | SSDQDSTNKEAEAAGVKPAGVRPR2. 2E+24                 | sp Q92625 ANS1A_HUMAN |
| 5644 | VLSSTSEEDPGVVK2220000000000                      | sp Q8NI08 NCOA7_HUMAN |
| 5645 | ERSDSGGSSEPFDR2020000000000000                   | sp P48634 PRC2A_HUMAN |
| 5646 | TIASDSEEEAGKELSDKK2000020000000000000            | sp Q96ST2 IWS1_HUMAN  |
| 5647 | ESAAPASPAPSPAPSPTAPPQK2E+22                      | sp Q3KQU3 MA7D1_HUMAN |
| 5648 | TSYQPSSPGR20000                                  | sp Q14134 TRI29_HUMAN |
| 5649 | ARSWSPPEVSR202000000000                          | sp Q9NR19 ACSA_HUMAN  |
| 5650 | YSPTSPTYSPPTPK20000030002000                     | sp P24928 RPB1_HUMAN  |
| 5651 | SPGSPPGPELPIETALDDR2E+19                         | sp Q8TEW0 PARD3_HUMAN |
| 5652 | TDDEDFVPSDASPPK20020000                          | sp P11388 TOP2A_HUMAN |
| 5653 | YPLCSADAAVSTTPPGSPPPPPLPEPPVLK2. 2E+20           | sp Q9BTC0 DIDO1_HUMAN |
| 5654 | TPLSFTNPLHSDDSDSDERNSDGAVTQNK2. 00202E+19        | sp Q05209 PTN12_HUMAN |
| 5655 | SVSQDLIK2000000000                               | sp Q9UPQ0 LIMC1_HUMAN |
| 5656 | AAESLTAIPEPASPQLLETPIHASQIQK2E+25                | sp Q14676 MDC1_HUMAN  |
| 5657 | SSPGQPEAGPEGAQERPSQAAPAVEAEGPGSSQAPR2E+35        | sp P40222 TXLNA_HUMAN |
| 5658 | IYQYIQR300000                                    | sp Q13627 DYR1A_HUMAN |
|      |                                                  | sp Q9Y463 DYR1B_HUMAN |
| 5659 | SKFDSDEEEEDTENVEAASSGK200000000000               | sp Q8TF01 PNISR_HUMAN |
| 5660 | SSSVLSLEGSEK20020002000                          | sp A1L390 PKHG3_HUMAN |
| 5661 | TQSPGGCSAEAVLAR2000000000000000                  | sp Q96MH2 HEX12_HUMAN |
| 5662 | LPNNSRPSTPTINVLESK2000200000000000               | sp Q15910 EZH2_HUMAN  |
| 5663 | SLHSAHSLASR200000200200                          | sp O15027 SC16A_HUMAN |
| 5664 | TYSLTTPAR20000000                                | sp Q9Y4H2 IRS2_HUMAN  |
| 5665 | ITPPAAKPGSPQAK20000000200000                     | sp P35658 NU214_HUMAN |
| 5666 | SHHAPMSPGSSGGGQPLAR2000000000000000              | sp O14497 ARI1A_HUMAN |
| 5667 | SKSPSPR2020000                                   | sp Q9UKV3 ACINU_HUMAN |
| 5668 | LSTTPSPTSSLHEDGVEDFR2. 20000022E+19              | sp O94842 TOX4_HUMAN  |
| 5669 | RADDFPVRDDPSDVTDEDEGPAEPPPPPK2002000000000000000 | sp Q3YEC7 RABL6_HUMAN |
| 5670 | KEESEESDDMGFLFD200000010000000                   | sp P05387 RLA2_HUMAN  |
|      |                                                  | sp P05386 RLA1_HUMAN  |
| 5671 | RPPSPDIVLSDNEQPSSPR200000000000022000            | sp Q86YP4 P66A_HUMAN  |
| 5672 | YTPTSPSYSPSSPEYTPTSPK2E+20                       | sp P24928 RPB1_HUMAN  |
| 5673 | THSTSSSLGSGESPF SR2220000000000000               | sp Q9UGV2 NDRG3_HUMAN |
| 5674 | KSPSDTEGLVK200000000000                          | sp O95297 MPZL1_HUMAN |
| 5675 | FHSSDSEEEHKK220200000000                         | sp Q96ST2 IWS1_HUMAN  |
| 5676 | FAELPEFRPEEVLPSPTLQSLATSPR2000000002000          | sp Q96RK0 CIC_HUMAN   |
| 5677 | GSNYHLSNDASDVE2000020000                         | sp Q96QE2 MYCT_HUMAN  |
| 5678 | TPSPPPFR202000000                                | sp Q7L4I2 RSRC2_HUMAN |
| 5679 | RPSPQPSPR20002000                                | sp Q9UQ35 SRRM2_HUMAN |

|      |                                                     |                       |
|------|-----------------------------------------------------|-----------------------|
| 5680 | ALFKPPEDSQDDESDSDAEEEEQTTKR2020000000000            | sp Q13769 THOC5_HUMAN |
| 5681 | SLSSSPQAQPPRPAELSDDEEVAELFQR2E+24                   | sp Q4V328 GRAP1_HUMAN |
| 5682 | LSSSSPGATVSPSSSDAEYDKLPDADLAR2.02E+19               | sp Q8NI08 NCOA7_HUMAN |
| 5683 | VQDTSNTGLGEDIHQLSK20000000000000                    | sp Q8IWA0 WDR75_HUMAN |
| 5684 | TVSPPIR200000                                       | sp Q9UHB6 LIMA1_HUMAN |
| 5685 | NVQQDNSEAGTQPQVQTDAAQTSQSPPSPELTSEENK20000000000    | sp Q92598 HS105_HUMAN |
| 5686 | GLPSPYNMSSAPGSR20000000000000                       | sp P15924 DESP_HUMAN  |
| 5687 | IPCESPPLEVVDTTASTK20000000000000                    | sp P46013 KI67_HUMAN  |
| 5688 | SGSPSDNSGAEEMEVSLAKPK2.020000200001E+21             | sp P31749 AKT1_HUMAN  |
| 5689 | YSPTSPTYSPPTPK300000030002000                       | sp P24928 RPB1_HUMAN  |
| 5690 | ASSLNENVDHSAALLK20000000000000                      | sp Q96SB3 NEB2_HUMAN  |
| 5691 | VEMYSGSDDDDDFNKLPK320000000000000                   | sp O60841 IF2P_HUMAN  |
| 5692 | ALSSAVQASPTSPGGSPSSSGQR20200000000                  | sp Q03164 KMT2A_HUMAN |
| 5693 | HGSGADSDYENTQSGDPLLGLEGK20000000000000              | sp Q9Y2X7 GIT1_HUMAN  |
| 5694 | SVSEHTSCPAESASDAAPLQR200000000000000                | sp Q8WUA7 TB22A_HUMAN |
| 5695 | TSSEMSWVDLNIPTPEAPPCYMDVIPEDHR2.002000000002E+29    | sp Q9H3M7 TXNIP_HUMAN |
| 5696 | TASRPDDIPDPSPPK200000002002000                      | sp Q5VZK9 LR16A_HUMAN |
| 5697 | STLESEKPGSPEAAETSPPSNIIDHCEK22000000000000          | sp Q96T23 RSF1_HUMAN  |
| 5698 | KNSSTDQGSDEEGLQK2000020000000000                    | sp Q12789 TF3C1_HUMAN |
| 5699 | NPPPQDYESDDDSYEVLDLTEYAR2000000000000000            | sp Q8IVP5 FUND1_HUMAN |
| 5700 | VDPSLMEDSDDGPSLPTK10020000000000                    | sp O15258 RER1_HUMAN  |
| 5701 | GTEPSPGGTPQSRPVPSPAGPPEGVPEEAQPPR2.0000002E+32      | sp Q8WUZ0 BCL7C_HUMAN |
| 5702 | AKKPEEESSESEEGSESEEEAPAGTR2.022000202E+19           | sp Q13428 TCOF_HUMAN  |
| 5703 | GHTDTEGRPPSPPTSTPEK20000000000                      | sp Q00613 HSF1_HUMAN  |
| 5704 | GQASSPTPEPGVGAGDLPGPTSAPVPSGSGGR2E+31               | sp Q14676 MDC1_HUMAN  |
| 5705 | SSSPILTKPTLK22000000000000                          | sp Q92794 KAT6A_HUMAN |
| 5706 | SRQTPSPDVVLR2020000000                              | sp Q9UPQ0 LIMC1_HUMAN |
| 5707 | DHNVGSPPKSPHASPQHTQTEK200000000000000               | sp A0JNW5 UH1BL_HUMAN |
| 5708 | ESPFSTSASPLLSGSQHFDVPPR2000000000000000             | sp O14980 XPO1_HUMAN  |
| 5709 | KPSPAASPAK200000                                    | sp Q8N3F8 MILK1_HUMAN |
| 5710 | GESAPTLSTSPSPSSPSTSPSPTLGR20200000000000            | sp Q9H330 TM245_HUMAN |
| 5711 | SPGLCSDSLEK200000000000                             | sp Q5VUA4 ZN318_HUMAN |
| 5712 | SLYASSPGGVYATR2000000000000000                      | sp P08670 VIME_HUMAN  |
| 5713 | SDSASSEPVGIYQGFQEK2000000003000000                  | sp Q05655 KPCD_HUMAN  |
| 5714 | ALQAPHSPSK200                                       | sp Q96AQ6 PBIP1_HUMAN |
| 5715 | DLQSSPPLPLGFLGEGDAVTK2000000000000000               | sp Q9UN79 SOX13_HUMAN |
| 5716 | ACASPSAQVEGSPVAGSDGSQPAVK2E+20                      | sp Q9UFC0 LRWD1_HUMAN |
| 5717 | SESPKEPEQLR2000000000                               | sp P09651 ROA1_HUMAN  |
| 5718 | NSSLGSPSNLCGSPGSI200000000020000000                 | sp Q9C0B0 UNK_HUMAN   |
| 5719 | SPGSGSQSSGWHEVEPGMPSPTTLK2.002E+25                  | sp Q12857 NFIA_HUMAN  |
| 5720 | SRTPLLPR202000000                                   | sp Q9UQ35 SRRM2_HUMAN |
| 5721 | SLMASLTNMSR200                                      | sp Q9ULS6 KCNS2_HUMAN |
| 5722 | RPSESDKEDELK202000000000                            | sp Q02952 AKA12_HUMAN |
| 5723 | EAEEGPTGASESQDSPR2000                               | sp Q5TCZ1 SPD2A_HUMAN |
| 5724 | EVSPDPSTGAASPASSAGGSAAR200020000000000000           | sp P23769 GATA2_HUMAN |
| 5725 | VAQGATEKSPEDK200000                                 | sp P49321 NASP_HUMAN  |
| 5726 | YSDTTDSDPENEPFDEDQHTQITK3.002202E+24                | sp P60484 PTEN_HUMAN  |
| 5727 | GTEPSPGGTPQSRPVPSPAGPPEGVPEEAQPPR2.000000000002E+29 | sp Q8WUZ0 BCL7C_HUMAN |
| 5728 | EMLMEDVGSEEEQEEDEAPFQEK1.0000002E+23                | sp Q9H1E3 NUCKS_HUMAN |
| 5729 | LLKPGEEPSEYTDDEEDTKDHNK200000000000                 | sp O15173 PGRC2_HUMAN |
| 5730 | YHGHSMSDPGVSYR21000002000                           | sp P29803 ODPAT_HUMAN |
| 5731 | KEATPRSR200                                         | sp P08559 ODPA_HUMAN  |
| 5732 | RQSSGSATNVASTPDNR20000000000000                     | sp Q99572 P2RX7_HUMAN |
|      |                                                     | sp Q7Z460 CLAP1_HUMAN |



|      |                                                  |                       |
|------|--------------------------------------------------|-----------------------|
| 5733 | GTSDSSSGNVSEGESPPDSQEDSFQGR20000000000000        | sp Q8WUB8 PHF10_HUMAN |
| 5734 | LCSSDTLVSEGEENQKPK200000000000000000             | sp Q5TOW9 FA83B_HUMAN |
| 5735 | INPPSSGGTSSSPIK20000                             | sp P14859 PO2F1_HUMAN |
| 5736 | AMSTTSSPQPGK10000020000000                       | sp Q9UJU6 DBNL_HUMAN  |
| 5737 | QEAGDSPPPAPGTPK20000000000                       | sp P49848 TAF6_HUMAN  |
| 5738 | SCMLTGTPEVQSAK2000000000                         | sp Q96AE4 FUBP1_HUMAN |
| 5739 | SLGSASPGPGQPPLSSPTR200000000020000               | sp Q9C0B5 ZDHC5_HUMAN |
| 5740 | SSEPVKETVQTTQSPTPVEK20000000                     | sp Q9UPN6 SCAF8_HUMAN |
| 5741 | NVAEALGHSPK2000                                  | sp Q8IU81 I2BP1_HUMAN |
| 5742 | SRSPQAFR202000000                                | sp Q7Z6E9 RBBP6_HUMAN |
| 5743 | SLENTPPFPTPK2000000002000                        | sp O15085 ARHGB_HUMAN |
| 5744 | DGSGTPSRHSLSGSSPGMK202200000                     | sp Q9UQ35 SRRM2_HUMAN |
| 5745 | LDLTENLTGSK200                                   | sp P46013 KI67_HUMAN  |
| 5746 | VTLYNTDQDGS DSPR200000                           | sp Q9UPW0 FOXJ3_HUMAN |
| 5747 | ALSSDSILSPAPDAR20000000000                       | sp Q8IVT2 MISP_HUMAN  |
| 5748 | RPAEATSSPTSPERPR20000000000                      | sp Q9BU76 MTA2_HUMAN  |
| 5749 | AGSPSPQPSGELPR2020000000000                      | sp Q92619 HMHA1_HUMAN |
| 5750 | ALSSLHGDDQDSEDEVLTIPEVK2.00000002E+20            | sp P11717 MPRI_HUMAN  |
| 5751 | TGVPSTASVGK20000                                 | sp P28290 SSFA2_HUMAN |
| 5752 | REEQTDSDGESVTHHIR20000000                        | sp P36915 GNL1_HUMAN  |
| 5753 | GPTTGEGALDLSVHSPPKSPEGK2000200000                | sp O95684 FR10P_HUMAN |
| 5754 | LEISPDSSPER200020000                             | sp Q99959 PKP2_HUMAN  |
| 5755 | ESAAPASPAPSPAPSPAPPQK200020000000000000          | sp Q3KQU3 MA7D1_HUMAN |
| 5756 | RLSSSLNPSK200000000                              | sp Q13535 ATR_HUMAN   |
| 5757 | WDSYENLSADGEVLHTQGPVDGSLYAK2E+25                 | sp Q68CZ2 TENS3_HUMAN |
| 5758 | GSPLAEGPQAFFPER2000000000000000                  | sp Q8WUF5 IASPP_HUMAN |
| 5759 | KSSSEAKPTSLGLAGGHK220000000000000000             | sp Q96RK0 CIC_HUMAN   |
| 5760 | QRSPSPAPAPAPAAAAGPPTRK2.02E+20                   | sp Q9H7N4 SFR19_HUMAN |
| 5761 | SSSQPSSCCSDPSKPGGNVEGATQSLAEQMR2.002E+29         | sp Q13501 SQSTM_HUMAN |
|      |                                                  | sp P30510 1C14_HUMAN  |
|      |                                                  | sp Q29865 1C18_HUMAN  |
|      |                                                  | sp P30504 1C04_HUMAN  |
|      |                                                  | sp Q9TNN7 1C05_HUMAN  |
|      |                                                  | sp P04222 1C03_HUMAN  |
| 5762 | GGSCSQAASSNSAQGSDES LIACK2000000000              | sp Q07000 1C15_HUMAN  |
|      |                                                  | sp Q29960 1C16_HUMAN  |
|      |                                                  | sp Q29963 1C06_HUMAN  |
|      |                                                  | sp P30505 1C08_HUMAN  |
|      |                                                  | sp P30508 1C12_HUMAN  |
|      |                                                  | sp Q95604 1C17_HUMAN  |
| 5763 | APSSDEECFFDLLTK20000000000000                    | sp Q86YR5 GPSM1_HUMAN |
| 5764 | RHSHSHSPMSTR20002002000                          | sp P62995 TRA2B_HUMAN |
| 5765 | RTDAL TSSPGR2220000                              | sp P49736 MCM2_HUMAN  |
| 5766 | ASPGHSPHYFAASSPTSPNALPPAR2.003E+20               | sp Q8TEM1 PO210_HUMAN |
| 5767 | ETINNLDTSSSDFTILQEIEEPSLEPENEK200000000000000000 | sp Q15424 SAFB1_HUMAN |
| 5768 | VASEAPLEHKPQVEASSPR20000                         | sp Q8TD19 NEK9_HUMAN  |
| 5769 | DSGSDTASAIIPSTTPSVDSDES VVK20000                 | sp Q6WKZ4 RFIP1_HUMAN |
| 5770 | HKSGSMEEDVDTSPGGDYTSPSSPTSSSR2.001E+28           | sp P08651 NFIC_HUMAN  |
| 5771 | RSPQQTVPYVVPLSPK2000000000002000                 | sp Q9UQR0 SCML2_HUMAN |
| 5772 | KPPAPSPVQSQSPSTNWS PAVPVK2.000200002002E+19      | sp Q8IYB3 SRRM1_HUMAN |
| 5773 | AGDRNSEDGVMVTFSSVK200000010000000                | sp Q9NY61 AATF_HUMAN  |
| 5774 | EVDGLLTSEPMGSPVSSK2000000                        | sp Q8WWM7 ATX2L_HUMAN |
| 5775 | HFSEHPSTSK2200                                   | sp O43719 HTSF1_HUMAN |
| 5776 | DTSATSQSVNGSPQAEQPSLESTSK2E+20                   | sp Q86WB0 NIPA_HUMAN  |

|      |                                                                   |                                                |
|------|-------------------------------------------------------------------|------------------------------------------------|
| 5777 | LGAGGGSPEKSPSAQELK200000000000                                    | sp Q9UNE7 CHIP_HUMAN                           |
| 5778 | TDCEPVGLEPAVEQSSAASELAEASSEELAEAPTEAPSPEAR220000000200<br>0000000 | sp Q15424 SAFB1_HUMAN<br>sp Q14151 SAFB2_HUMAN |
| 5779 | SVSPPPK20200000                                                   | sp Q13247 SRSF6_HUMAN                          |
| 5780 | RLSSTSLASGHSVR202000000000                                        | sp Q9BZL6 KPCD2_HUMAN                          |
| 5781 | KKPSTDEQTSSAEEDVPTCGYLNVLNSNR2.00022E+25                          | sp Q8N556 AFAP1_HUMAN                          |
| 5782 | MSGGSTMSSGGGNTNNSNSK2000000000000000                              | sp Q86U70 LDB1_HUMAN                           |
| 5783 | TLNAETPKSSPLPAK20002000000                                        | sp Q7L2J0 MEPCE_HUMAN                          |
| 5784 | RPLRPQVVTDDDGQAPEAK200000000000                                   | sp Q9HDC9 APMAP_HUMAN                          |
| 5785 | YFDSGDYNMAK200000000                                              | sp 043768 ENSA_HUMAN<br>sp P56211 ARP19_HUMAN  |
| 5786 | EDKSPSEESAPTTSPESVSGVSPSSGSSGR2.2E+19                             | sp P54725 RD23A_HUMAN                          |
| 5787 | SSPSILAVQR2000000000                                              | sp 014646 CHD1_HUMAN                           |
| 5788 | EPLENSASESSDTELPEK202200000000                                    | sp P78337 PITX1_HUMAN                          |
| 5789 | TLENSPISSCDTSDEGVPVNSAAVLK2.002E+24                               | sp Q8N556 AFAP1_HUMAN                          |
| 5790 | ESEQESEEEILAQK20000000000000                                      | sp Q9BW71 HIRP3_HUMAN                          |
| 5791 | SFYSSHYAR2000000000                                               | sp Q8NEY8 PPHLN_HUMAN                          |
| 5792 | CDILVQEELLASPK2000                                                | sp Q96JM3 CHAP1_HUMAN                          |
| 5793 | SLSYSPVER20200000                                                 | sp Q9UQ35 SRRM2_HUMAN                          |
| 5794 | STSPAGQHHSPISSR2200000000000000                                   | sp Q5T200 ZC3HD_HUMAN                          |
| 5795 | GTEPSPGGTPQSRPVSPAGPPEGVPEEAQPPR2.0002E+21                        | sp Q8WUZ0 BCL7C_HUMAN                          |
| 5796 | SRVSVSPGR2020000                                                  | sp Q8IYB3 SRRM1_HUMAN                          |
| 5797 | SLSVEHLETK20200000000                                             | sp P26045 PTN3_HUMAN                           |
| 5798 | FQEQECPPSPEPTRK20000000                                           | sp P62070 RRAS2_HUMAN                          |
| 5799 | SYSPAHR202000000                                                  | sp Q9Y2W1 TR150_HUMAN                          |
| 5800 | GSSPLGPAGLGAEEPAAGPQLPSWLQPER2E+27                                | sp 043482 MS18B_HUMAN                          |
| 5801 | ISDSESEDPPR20000000000                                            | sp Q96ST2 IWS1_HUMAN                           |
| 5802 | SGSSPSQSPCDLEEPWLPR2.0200000002E+20                               | sp Q5SYE7 NHSL1_HUMAN                          |
| 5803 | AGPTLTDENGDDLGLPPSPGDTSYQQDQVDDFHEAR3000000000000                 | sp Q9NQZ2 SAS10_HUMAN                          |
| 5804 | SVSNGTAKPATSENFDL2.02E+20                                         | sp Q96K49 TM87B_HUMAN                          |
| 5805 | ASAGHVAVSSPTPETGPLQR200000000000                                  | sp P42695 CNDD3_HUMAN                          |
| 5806 | TAHNSEADLEESFNEHELEPSSPK2E+20                                     | sp Q8IWS0 PHF6_HUMAN                           |
| 5807 | LCSSSDTLVSEGEENQKPK20000000000000                                 | sp Q5T0W9 FA83B_HUMAN                          |
| 5808 | SPSTTYLHTPTSEDAAIPSK2E+19                                         | sp Q13111 CAF1A_HUMAN                          |
| 5809 | SPQTLAPVGEDAMKTPSPAEDAR20200000000                                | sp Q92797 SYMPK_HUMAN                          |
| 5810 | LAELPAAQPSAEDSDTEDDSEAEQTER2000002000200000000                    | sp 095714 HERC2_HUMAN                          |
| 5811 | NIPSPGQLDPDTR20000000000                                          | sp Q9P2D1 CHD7_HUMAN                           |
| 5812 | SAQGSSSPVPSMVQK2000010000                                         | sp P35658 NU214_HUMAN                          |
| 5813 | HTGMASIDSSAPETTSDSPTLSR1E+21                                      | sp A7E2V4 ZSWM8_HUMAN                          |
| 5814 | YSPCEEHPAETNQNEGSESGTIR2E+22                                      | sp Q12774 ARHG5_HUMAN                          |
| 5815 | SAASPVVSSMPER20000010000                                          | sp P18583 SON_HUMAN                            |
| 5816 | FGSTGSTPPVSPTPSER200020000000                                     | sp Q969V6 MKL1_HUMAN                           |
| 5817 | TPSSSPPITPPASETK22000000000000                                    | sp Q9NZJ0 DTL_HUMAN                            |
| 5818 | AAPEASSPPASPLQHLLPGK2000000000000000                              | sp Q96TA1 NIBL1_HUMAN                          |
| 5819 | KGPGQPSSPQR20000                                                  | sp 095400 CD2B2_HUMAN                          |
| 5820 | SSATSGDIWPGLSAYDNSPR2E+19                                         | sp Q9NYF8 BCLF1_HUMAN                          |
| 5821 | TASPPGPPYGK20000000000                                            | sp P54259 ATN1_HUMAN                           |
| 5822 | VVSAPVGKETPSK20000                                                | sp Q13416 ORC2_HUMAN                           |
| 5823 | RPASQKDSGAASEQATAAPNPCSSSR2000000000000000                        | sp Q9BU23 LMF2_HUMAN                           |
| 5824 | DNQESSDAELSSSEYIK2000022000000                                    | sp Q96JM3 CHAP1_HUMAN                          |
| 5825 | TFSLTEVR2000000                                                   | sp 095239 KIF4A_HUMAN                          |
| 5826 | TGVTSTSDSEEGDDQEGEKK2020000000000000                              | sp 075475 PSIP1_HUMAN                          |
| 5827 | HSSTGDSADAGPPAAGSAR2000000000000000                               | sp Q6ZU35 K1211_HUMAN                          |
| 5828 | EVPPPPAESEEEEDDGLPK200000000000                                   | sp Q9H6X2 ANTR1_HUMAN                          |



|      |                                                |                       |
|------|------------------------------------------------|-----------------------|
|      |                                                | sp P05534 1A24_HUMAN  |
|      |                                                | sp Q09160 1A80_HUMAN  |
| 5873 | KGGSYSQAASSDSAQGSVSLTACK20000000000000         | sp P30447 1A23_HUMAN  |
|      |                                                | sp P01891 1A68_HUMAN  |
|      |                                                | sp P01892 1A02_HUMAN  |
|      |                                                | sp P10316 1A69_HUMAN  |
| 5874 | AAPPPPALTPDSQTVDSCKTPEVSFLPEEATEEAGVR2.002E+21 | sp Q9H7N4 SFR19_HUMAN |
| 5875 | GPKPEPPGSGSPAPPR200000000                      | sp Q9UKJ3 GPTC8_HUMAN |
| 5876 | RDSFDDR200000                                  | sp P43243 MATR3_HUMAN |
| 5877 | KRSEDESETEDEEEK20002020000000                  | sp P25205 MCM3_HUMAN  |
| 5878 | VSCHDSDDDIMR20000000                           | sp Q76FK4 NOL8_HUMAN  |
| 5879 | SMSENAVR200000000                              | sp Q9GZY8 MFF_HUMAN   |
| 5880 | SDGACDSPSSDKENSSQIAQDHQK2000000000000000       | sp Q9UIG0 BAZ1B_HUMAN |
| 5881 | GILSLPHQASVSR200000                            | sp O75925 PIAS1_HUMAN |
| 5882 | LQQGAGLESPQGQPEPGAASPQR2000000000000000        | sp Q9H6F5 CCD86_HUMAN |
| 5883 | DKRPLSGPDVGTQPAGLASGAK200000000000000000       | sp O96013 PAK4_HUMAN  |
| 5884 | GSSDGRGSDSEDLPHR200000202000000000             | sp Q9UPQ0 LIMC1_HUMAN |
| 5885 | EISSPESCPPEIK22000200000000                    | sp Q92889 XPF_HUMAN   |
| 5886 | SVASSQPAKPTK20000000000000                     | sp Q07157 ZO1_HUMAN   |
| 5887 | LGASNSPGQPNSVK200000000000                     | sp P49756 RBM25_HUMAN |
| 5888 | ISYIPDEEVSSPSPQR200000                         | sp Q9Y6M1 IF2B2_HUMAN |
| 5889 | EGSPAPLEPEPGAAPK2000000000000000               | sp Q01167 FOXK2_HUMAN |
| 5890 | AGMSSNQSISSPVLDAVPR122002002000000000          | sp Q9UQ35 SRRM2_HUMAN |
| 5891 | KPEKPLFSSASPQDSSPR2000                         | sp O00712 NF1B_HUMAN  |
| 5892 | LDSSPVSSPR20002000                             | sp O60293 ZC3H1_HUMAN |
| 5893 | TSAQHALTSVSRGSSLK22000                         | sp P61073 CXCR4_HUMAN |
| 5894 | ASQEPSKPGTEVIPAAPR2000000000000000             | sp Q96CP2 FWCH2_HUMAN |
| 5895 | TSPPLDR20000000                                | sp Q9UQ35 SRRM2_HUMAN |
| 5896 | SSSEYTSFQSR20000000000000                      | sp Q9BTU6 P4K2A_HUMAN |
| 5897 | SRSPIIHSFK20000002000                          | sp O94913 PCF11_HUMAN |
|      |                                                | sp Q15836 VAMP3_HUMAN |
| 5898 | DQKLELDDR2000000                               | sp P23763 VAMP1_HUMAN |
|      |                                                | sp P63027 VAMP2_HUMAN |
| 5899 | SLTNSHLEKK20002000000                          | sp Q9H2H9 S38A1_HUMAN |
| 5900 | SPSVSPEPAEK2000220000000                       | sp Q9UQ35 SRRM2_HUMAN |
| 5901 | VVPEDGSPEKR200000                              | sp Q02040 AK17A_HUMAN |
| 5902 | NSPVTKTPPR2000020000                           | sp Q13541 4EBP1_HUMAN |
| 5903 | LCDDGPQLPTSPR20000                             | sp O60504 VINEX_HUMAN |
| 5904 | HRGSEEDPLLSPVETWK200000020000000               | sp Q13017 RHG05_HUMAN |
| 5905 | LSPERSDSESNENEPHLPHGVSQR202000000000000000     | sp Q9BQ52 RNZ2_HUMAN  |
| 5906 | SSATSGDIWPGLSAYDNSPR200000000003000000         | sp Q9NYF8 BCLF1_HUMAN |
| 5907 | SKPNLPSESR200                                  | sp Q08170 SRSF4_HUMAN |
| 5908 | TCNSPQNSTDSVSDIVPDSPPFGALGSDTR2E+27            | sp Q14694 UBP10_HUMAN |
| 5909 | ELSNSPLRENSFGSPLEFR200000002002000000          | sp Q9UQ35 SRRM2_HUMAN |
| 5910 | HASSPESPKPAPAPGSHR20000000000000               | sp Q9UQ35 SRRM2_HUMAN |
| 5911 | LGGAVPFAPPEVSPEQAK2000000                      | sp Q6ZSR9 YJ005_HUMAN |
| 5912 | SPHSPSIATPPSQSSSCDAPMLSTVHSAK2.002020002E+31   | sp Q9NYF8 BCLF1_HUMAN |
| 5913 | AGAPVGGSPGLAK2000000                           | sp Q6ZRS2 SRCAP_HUMAN |
| 5914 | MVIQGPSSPQGEAMVTDVLEDQK1.0000020000001E+23     | sp Q12888 TP53B_HUMAN |
| 5915 | IEEVLSPGSPSKSPSK2000200020000                  | sp Q9UEY8 ADDG_HUMAN  |
| 5916 | SSSPGKQAVSSLNSSHRSR20000000000000000000        | sp Q9UHB7 AFF4_HUMAN  |
| 5917 | YETPSDAIEVISPASSAPPQEK2000200000000            | sp O75376 NCOR1_HUMAN |
| 5918 | DFDIAEQNESSDEESLRK2200000000                   | sp Q96KC8 DNJC1_HUMAN |
| 5919 | GPAFNMASPESDFGINLK10200000000000               | sp Q09666 AHNK_HUMAN  |

|      |                                              |                       |
|------|----------------------------------------------|-----------------------|
| 5920 | INPPSSGGTSSSPIK20000000                      | sp P14859 PO2F1_HUMAN |
| 5921 | GSRPPLILQSQLPCSSPR2000                       | sp Q6KC79 NIPBL_HUMAN |
| 5922 | LSLSPISLAESWEDGSPPPQAR2000020000000          | sp A1L170 CA226_HUMAN |
| 5923 | ELEENDSENSEFEDDGSEKVLDEEGSER2.0020000002E+22 | sp 043719 HTSF1_HUMAN |
| 5924 | DVLSLLNLSR2000                               | sp Q96AY4 TTC28_HUMAN |
| 5925 | ALVVPEPEPDSNSQER20200000                     | sp Q5VTR2 BRE1A_HUMAN |
| 5926 | RNSTTIMSR20000000                            | sp Q7Z309 F122B_HUMAN |
| 5927 | SATPVNCEQPDILVSSTPINEGQTVLTK2E+28            | sp P82094 TMF1_HUMAN  |
| 5928 | SGPKPFSAPKPKTSPSPK2002000                    | sp Q01518 CAP1_HUMAN  |
| 5929 | EEAPASPLRPLYPQISPLK200000000020000           | sp P85037 FOXK1_HUMAN |
| 5930 | SESPKEPEQLR200000000000                      | sp P09651 ROA1_HUMAN  |
| 5931 | NSLPASPAHQLSSSPR200000002000                 | sp Q8TEK3 DOT1L_HUMAN |
| 5932 | SGTNSPPPPFSDWGR200000000000                  | sp Q9UKT5 FBX4_HUMAN  |
|      |                                              | sp Q09160 1A80_HUMAN  |
|      |                                              | sp P05534 1A24_HUMAN  |
| 5933 | GGSYSQAASSDSAQGSVDVSLTACK20002000000000      | sp P30447 1A23_HUMAN  |
|      |                                              | sp P01891 1A68_HUMAN  |
|      |                                              | sp P01892 1A02_HUMAN  |
|      |                                              | sp P10316 1A69_HUMAN  |
|      |                                              | sp P24941 CDK2_HUMAN  |
| 5934 | IGEGTYGVVYK23000000                          | sp P06493 CDK1_HUMAN  |
|      |                                              | sp Q00526 CDK3_HUMAN  |
| 5935 | VNSNGKESPGSSEFFQEAVSHGK22000000000000        | sp Q8N108 MIER1_HUMAN |
| 5936 | TQLWASEPGTPLPTSLPSQNPILK2000000000000000     | sp Q9BXP5 SRRT_HUMAN  |
| 5937 | RPSQPSPR20000000                             | sp Q9UQ35 SRRM2_HUMAN |
| 5938 | SSGDPEQIKEDSLSEESADAR2.000000000202E+20      | sp Q9BVS4 R1OK2_HUMAN |
| 5939 | EDEISPPPPNPVVK200000000000                   | sp P10644 KAPO_HUMAN  |
|      |                                              | sp Q13247 SRSF6_HUMAN |
| 5940 | LIVENLSSR200                                 | sp Q08170 SRSF4_HUMAN |
|      |                                              | sp Q13243 SRSF5_HUMAN |
| 5941 | ITEVSCKSPQESFK200000000                      | sp P46013 KI67_HUMAN  |
| 5942 | IPSEMPSPNFGK20002000000                      | sp Q9H2J7 S6A15_HUMAN |
| 5943 | ALSSGGSITSPPLSPALPK200000000002000000        | sp Q6Y7W6 PERQ2_HUMAN |
| 5944 | GEGDAPFSEPGTTSTQRPSSPETATK20000000           | sp Q9UQ35 SRRM2_HUMAN |
| 5945 | DSPGIPPSANAHQLFR2000002000000000             | sp P51812 KS6A3_HUMAN |
| 5946 | RSPSPAPPPR2020000000                         | sp Q8IYB3 SRRM1_HUMAN |
| 5947 | SSPQLDPLR200000000                           | sp Q8ND56 LS14A_HUMAN |
| 5948 | VQAGPGSPR2000                                | sp Q6PK04 CC137_HUMAN |
| 5949 | GGAPDPSPGATATPGAPAQPSSPDAR2000000000200000   | sp 095365 ZBT7A_HUMAN |
| 5950 | RLSSASTGKPLSVEDDFEK200200000000000000        | sp 075152 ZC11A_HUMAN |
| 5951 | AMSTTSISSPQPGK2000000                        | sp Q9UJU6 DBNL_HUMAN  |
|      |                                              | sp P42166 LAP2A_HUMAN |
| 5952 | EQGTESRSSTPLPTISSAENTR2.0202E+20             | sp P42167 LAP2B_HUMAN |
|      |                                              | sp Q86WB0 NIPA_HUMAN  |
| 5953 | DTSATSQSVNGSPQAEQPSLESTSK200020000000000000  | sp Q8WWM7 ATX2L_HUMAN |
| 5954 | STSTPTSPGPR200000                            | sp Q8IYB3 SRRM1_HUMAN |
| 5955 | KETESEAEDNLDDLEK2000000000000000             | sp Q9H6F5 CCD86_HUMAN |
| 5956 | ALVEFESNPEETREPGSPSVQR20000000000000         | sp Q9Y3T9 NOC2L_HUMAN |
| 5957 | SPDKPGGSPSASR20000002000000                  | sp P21796 VDAC1_HUMAN |
| 5958 | LTFDSSFSPNTGK200000000                       | sp Q2PPJ7 RGPA2_HUMAN |
| 5959 | RSSSPAELDLKDDLQQTQGK220000000000000000       | sp Q02241 KIF23_HUMAN |
| 5960 | RSSTVAPAQPDGAESEWTDVETR2E+20                 | sp Q9Y2U5 M3K2_HUMAN  |
| 5961 | RGSDIDNPTLTVMDISPPSR2000000000000200000      | sp Q9H4L7 SMRCD_HUMAN |
| 5962 | DTVIIIVSEPEDEESQGLPTMAR200000002000001000    |                       |

|      |                                                        |           |             |
|------|--------------------------------------------------------|-----------|-------------|
| 5963 | GPDPGEDLADLEVVVPGSPGDCLPEEADGTDTHLGLPAGASQPALTSSR2E+32 | sp 060343 | TBCD4_HUMAN |
| 5964 | GGGTPDANSLAPPK200000000000                             | sp Q9BRQ0 | PYG02_HUMAN |
| 5965 | TEPAAEAEAAASGPSESPSPAAEELPGSHAEPVPAQGEAPGEQAR2E+31     | sp P55884 | EIF3B_HUMAN |
| 5966 | SDGEAKPEPSPSR20000000000000                            | sp P26358 | DNMT1_HUMAN |
| 5967 | RPNKQEESESPVERPLK20200000000                           | sp Q96SB4 | SRPK1_HUMAN |
| 5968 | LSSLPLR20000                                           | sp Q66K74 | MAP1S_HUMAN |
|      |                                                        | sp P49792 | RBP2_HUMAN  |
|      |                                                        | sp Q7Z3J3 | RGPD4_HUMAN |
|      |                                                        | sp O14715 | RGPD8_HUMAN |
| 5969 | DSLITPHVSR200                                          | sp Q99666 | RGPD5_HUMAN |
|      |                                                        | sp A6NKT7 | RGPD3_HUMAN |
|      |                                                        | sp PODJD0 | RGPD1_HUMAN |
|      |                                                        | sp PODJD1 | RGPD2_HUMAN |
| 5970 | AGGPTTPLSPTR20000000                                   | sp P20700 | LMNB1_HUMAN |
| 5971 | RVISDESSEDIGSDVEFKPDK2.020200002E+19                   | sp P52701 | MSH6_HUMAN  |
| 5972 | TENSLANENQQPIKSEPESEGEPEK2E+22                         | sp Q8NHM5 | KDM2B_HUMAN |
| 5973 | NRENSPSSQSAGLSSINK2000000000000000                     | sp Q9H2Y7 | ZN106_HUMAN |
| 5974 | SETPPHWR202000000                                      | sp Q13427 | PIIG_HUMAN  |
| 5975 | EVHDELEDLPSPPPPLSPPTTSPHK20000020000200000             | sp Q9NQX3 | GEPH_HUMAN  |
| 5976 | SHMSGSPGPGSNTAPSTPVIGGSDKPGMEK2.02E+29                 | sp A0FGR8 | ESYT2_HUMAN |
| 5977 | SSATSGDIWPGLSAYDNSPR200000000000002000                 | sp Q9NYF8 | BCLF1_HUMAN |
| 5978 | RVSPLNLSSVTP20000000200                                | sp Q9UJX2 | CDC23_HUMAN |
| 5979 | APSDSSLGTPSDGRPELR2000000000000000                     | sp Q15642 | CIP4_HUMAN  |
| 5980 | TPTPSTPGDTQPNTAPVPPAEDGIK2.02E+24                      | sp Q14839 | CHD4_HUMAN  |
| 5981 | RADLNQGIGEPQSPSR20000                                  | sp Q96C19 | EFHD2_HUMAN |
| 5982 | ALSSGGSITSPPLSPALPK200000200000000000                  | sp Q6Y7W6 | PERQ2_HUMAN |
| 5983 | ELSNSPLRENSFGSPLEFR202000000002000000                  | sp Q9UQ35 | SRRM2_HUMAN |
| 5984 | KNSTDLDLSDAPEDPTSPK2200000000002000                    | sp Q96RK0 | CIC_HUMAN   |
| 5985 | LQLGTPPPLAAR2000000000                                 | sp Q9P2N5 | RBM27_HUMAN |
| 5986 | SASLSHPGGEGERPAR2000000000000000                       | sp Q2M3G4 | SHRM1_HUMAN |
|      |                                                        | sp P01891 | 1A68_HUMAN  |
|      |                                                        | sp P10316 | 1A69_HUMAN  |
| 5987 | KGGSYSQAASSDSAQGSVSLTACK20000000000000                 | sp P05534 | 1A24_HUMAN  |
|      |                                                        | sp P30447 | 1A23_HUMAN  |
|      |                                                        | sp Q09160 | 1A80_HUMAN  |
|      |                                                        | sp P01892 | 1A02_HUMAN  |
| 5988 | LDSEMMDHSENYDTMSSPLPGK2000030100000000                 | sp Q9NTI5 | PDS5B_HUMAN |
| 5989 | GDQPAASGSDDDDEPPPLPR2000000000000000                   | sp O00264 | PGR1_HUMAN  |
| 5990 | STSPIIGSPPVR220000000000                               | sp Q86TB9 | PATL1_HUMAN |
| 5991 | RKPSTSDSDSNFEK20200200000000                           | sp P11388 | TOP2A_HUMAN |
| 5992 | GAAAAATGQPGTAPAGTPGAPPLAGMAIVK2000000000000000         | sp Q13263 | TIF1B_HUMAN |
| 5993 | YRPASVPPSPSLSR20002000000                              | sp P13807 | GYS1_HUMAN  |
| 5994 | KFSAGGSDPPLKR20000000000000                            | sp O75152 | ZC11A_HUMAN |
| 5995 | SLSSGESGPGSPTHSHLSR20000000000000000000                | sp Q6P0Q8 | MAST2_HUMAN |
| 5996 | ERSPSPLR2020000                                        | sp Q9Y2V2 | CHSP1_HUMAN |
| 5997 | LFEDDSDNEKLFDEEEDSSEKLFDDSDER2.00000000022E+23         | sp O43719 | HTSF1_HUMAN |
| 5998 | NRPPLPAGTNSK200                                        | sp P42167 | LAP2B_HUMAN |
|      |                                                        | sp P42166 | LAP2A_HUMAN |
| 5999 | QRGSETGSETHESDLAPSDK2000200000000000                   | sp P48634 | PRC2A_HUMAN |
| 6000 | SLSPGVS2000000                                         | sp Q9UKV3 | ACINU_HUMAN |
| 6001 | SLPITIEMLK20000000000                                  | sp Q8IZ21 | PHAR4_HUMAN |
| 6002 | FASENDLPEWK2000000000                                  | sp P43487 | RANG_HUMAN  |
| 6003 | SPQISMSDIDLNLK2000000000000000                         | sp Q09666 | AHMK_HUMAN  |

|      |                                                   |                       |
|------|---------------------------------------------------|-----------------------|
| 6004 | KTSSDDESEEDDLLQR220000000000000000                | sp Q9Y5J1 UTP18_HUMAN |
| 6005 | GQKPALDCSQVSPRPATSPENNASLSDTSPMDSSPSGIPK2.002E+33 | sp P18858 DNLI1_HUMAN |
| 6006 | QRGSETGSETHESDLAPSDK20200000000000                | sp P48634 PRC2A_HUMAN |
| 6007 | RPMEEDGEEKSPSKK200000                             | sp Q12906 ILF3_HUMAN  |
| 6008 | IPATEQTNQVIEKASDSEEPEEK2000000000                 | sp Q9C0E8 LNP_HUMAN   |
| 6009 | TAVQYIESSDSEEIETSELPQK2200000000000000            | sp Q14527 HLTF_HUMAN  |
| 6010 | INPDNYGMDLNSDDSTDDEAHPR10002002200000000          | sp Q9NQS7 INCE_HUMAN  |
| 6011 | GPSQATSPIR20000                                   | sp Q7RTP6 MICA3_HUMAN |
| 6012 | VQMTSPSSTGSPMFK10200000001000                     | sp P49790 NU153_HUMAN |
| 6013 | RLSSASTGKPPLSVEDDFEK2200200000000000000           | sp O75152 ZC11A_HUMAN |
| 6014 | IAASSFR2000                                       | sp Q99961 SH3G1_HUMAN |
| 6015 | TSSVSSISQVSPER20000                               | sp P42356 PI4KA_HUMAN |
| 6016 | DTVIIVSEPEDEESQGLPTMAR200200002000001000          | sp Q9H4L7 SMRCD_HUMAN |
| 6017 | FHSPSTTWSFNK20000020000                           | sp Q99590 SCAFB_HUMAN |
| 6018 | AAHVPENSDEQDVLTVKPV2000000000000000               | sp Q9H2Y7 ZN106_HUMAN |
| 6019 | SVASNQSEMEFSSLQDMPK20020000000001000              | sp Q8N163 CCAR2_HUMAN |
| 6020 | IAAPELHKGSDSEDEPTKK202000000000                   | sp Q92733 PRCC_HUMAN  |
| 6021 | SDELLGSDSHDGESESNAK2002000000000000               | sp P38398 BRCA1_HUMAN |
| 6022 | VGSGQGGSPCWK200000                                | sp Q9UMN6 KMT2B_HUMAN |
| 6023 | KPESPYGNLCDAPDSRPVK200000000002000000             | sp Q9UKA4 AKA11_HUMAN |
| 6024 | LQELESCSGLGSTDDTDVR200000000                      | sp Q14C86 GAPD1_HUMAN |
| 6025 | SSISSISGR200000000                                | sp Q86SQ0 PHLB2_HUMAN |
| 6026 | ESEGEDEDEDEDLSK2000000000000000                   | sp O95218 ZRAB2_HUMAN |
| 6027 | ESAAPASPAPSPAPSPPTAPPQK2.0000000020002E+22        | sp Q3KQU3 MA7D1_HUMAN |
| 6028 | SLNFQEDDDTSR200                                   | sp Q9H814 PHAX_HUMAN  |
| 6029 | VESEESGDEEGKKHSSGIVADLSEQSLK2.002E+26             | sp Q15435 PP1R7_HUMAN |
| 6030 | APAGQEEPTGTPSSPLSAEQDR220000000000                | sp P13051 UNG_HUMAN   |
| 6031 | NSLLAGDDDTMSVISGISSR2000200                       | sp Q8N3U4 STAG2_HUMAN |
| 6032 | GLNTSQESDDDILDESSPEGTQK2.2E+21                    | sp Q5VV41 ARHGG_HUMAN |
| 6033 | ASPPGDLQNP20000000000                             | sp O00273 DFFA_HUMAN  |
| 6034 | KPSPSEPEPWKPFPAVSPEPR2000000000000200000          | sp Q96JM3 CHAP1_HUMAN |
| 6035 | NSNFSVQHPSSTSPTEK200000                           | sp Q03468 ERCC6_HUMAN |
| 6036 | GLMAGGRPEGQYSEDEDTDDEYK1.000000003E+22            | sp Q9NPQ8 RIC8A_HUMAN |
| 6037 | SIGASPNPFSVHTATAVPSGK2.0002E+21                   | sp P09884 DPOLA_HUMAN |
| 6038 | SYSPDGKESPSDKK230000002000000                     | sp P43243 MATR3_HUMAN |
| 6039 | SLTRSPPAIR202000000                               | sp Q9UQ35 SRRM2_HUMAN |
| 6040 | LRLSPSPTSQR2000000                                | sp P02545 LMNA_HUMAN  |
| 6041 | VSPSTSYTPSR20000                                  | sp Q9BTE3 MCMBP_HUMAN |
| 6042 | VSITSEVESTSNPSSSSLQK22000000000000                | sp Q04656 ATP7A_HUMAN |
| 6043 | QGSITSPQANEQSVTPQRR202000000000200000             | sp Q9UQ35 SRRM2_HUMAN |
| 6044 | DGDSYDPYDFSDTEEEMPQVHTPK300002000100000000        | sp P25205 MCM3_HUMAN  |
| 6045 | GEDSAEETEAKPAVVAPAVVEAVSTPSAAFPDATAEQGPILTK2E+42  | sp Q12906 ILF3_HUMAN  |
| 6046 | MSQPGSPSPK200000                                  | sp Q14839 CHD4_HUMAN  |
| 6047 | SDATNYASHSPVNR2000000                             | sp Q96FJ0 STALP_HUMAN |
| 6048 | QVPVMQGTGMQGASIQGGSQPGGFSPGQNVTPQDHEK2E+25        | sp P33240 CSTF2_HUMAN |
| 6049 | GGSPQMDDIK200000000                               | sp Q13144 E12BE_HUMAN |
| 6050 | HHYDSDEKSETR200020000                             | sp Q9BQ39 DDX50_HUMAN |
| 6051 | SLPTTVPESPNYR200000                               | sp Q6PKG0 LARP1_HUMAN |
| 6052 | IQQEESGGEEDSDLSPEER2200002000000000               | sp Q6NXS1 IPP2M_HUMAN |
|      |                                                   | sp P41236 IPP2_HUMAN  |
| 6053 | TTSFFLNSPEK2000020000                             | sp Q8WYP5 ELYS_HUMAN  |
| 6054 | VASETHSEGSEYEELPK2000200000000000                 | sp Q5JSZ5 PRC2B_HUMAN |
| 6055 | AVLSPGSVFSR20000020000                            | sp P27987 IP3KB_HUMAN |

|      |                                                      |    |        |             |
|------|------------------------------------------------------|----|--------|-------------|
| 6056 | NTADHDESPRPTPGNAPSESSEDIDISSPNVSHDESIK2. 0200002E+28 | sp | 095251 | KAT7_HUMAN  |
| 6057 | TSSKESPIPSPTSDRK2002200020000000                     | sp | Q01082 | SPTB2_HUMAN |
| 6058 | KSPGVEIK20000000                                     | sp | Q9Y597 | KCTD3_HUMAN |
| 6059 | KGSTFRPHDSFPK200000020000                            | sp | Q9P206 | K1522_HUMAN |
| 6060 | TSVLGGGEDGIEVSPPEGMTEPGHSR20000000000000             | sp | Q9Y618 | NCOR2_HUMAN |
| 6061 | SPVSPGSSSPQLQVK20000000200000000                     | sp | Q8N3F8 | MILK1_HUMAN |
| 6062 | LSTGTTVEDVQK200000000000                             | sp | Q86SQ0 | PHLB2_HUMAN |
| 6063 | TRDDGDEEGLLTHSEEELEHSQDTDADDGALQ2E+19                | sp | Q9UKM9 | RALY_HUMAN  |
| 6064 | SLDGVTNDR2000000000                                  | sp | Q9UBM7 | DHCR7_HUMAN |
| 6065 | GEAERGGSSGDEL20022000000                             | sp | Q7Z4V5 | HDGR2_HUMAN |
| 6066 | TPTPSTPGDTQPNTAPVPPAEDGIK2. 2E+22                    | sp | Q14839 | CHD4_HUMAN  |
| 6067 | KVEEESPGDPDHEASTQGR200000000000000                   | sp | Q9NZZ2 | OGFR_HUMAN  |
| 6068 | SEHSHSTLPR200200000000                               | sp | P16144 | ITB4_HUMAN  |
| 6069 | HFSEHPSTSK20200                                      | sp | 043719 | HTSF1_HUMAN |
| 6070 | QAPGVGAVGGSPEREVEGAGYNSEDEYEAAAAR2. 000000000002E+23 | sp | Q96G74 | OTUD5_HUMAN |
| 6071 | GAASTLVPGVSETSASPGSPSVR200200000                     | sp | Q6ZRS2 | SRCAP_HUMAN |
| 6072 | TNLTSQSSTNLPSPGSPGSPGSPGSPGSPGSPK20020000000         | sp | Q6IN85 | P4R3A_HUMAN |
| 6073 | LVKPSSSSSGSR2000200                                  | sp | Q9H6B4 | CLMP_HUMAN  |
| 6074 | RHSEQVANGPTPPR20000000000000                         | sp | A6ND36 | FA83G_HUMAN |
| 6075 | EWYQSTIPQSPAPDDPEEGR200000000000000000               | sp | Q08499 | PDE4D_HUMAN |
| 6076 | KPTSPVKIPQNTTEYR20000000000000                       | sp | P25054 | APC_HUMAN   |
| 6077 | ESSEPPAPASSPEAASPTQGPAGTSK2. 0000002E+25             | sp | Q92766 | RREB1_HUMAN |
| 6078 | HDDGTQSDSENAGHR20000000000                           | sp | Q5SW79 | CE170_HUMAN |
| 6079 | ESSTSEGADQKMSPEDDSDTKR220000000000                   | sp | Q15424 | SAFB1_HUMAN |
| 6080 | YMSQMSVPEQAELEK2000000000                            | sp | Q15154 | PCM1_HUMAN  |
| 6081 | AGSSTPGDAPPAAEVQGR202000000000000000                 | sp | Q7Z6Z7 | HUWE1_HUMAN |
| 6082 | SPGASNFTLTK20000000000000                            | sp | Q9Y4E8 | UBP15_HUMAN |
| 6083 | AKSPTSPSPPR20202020000                               | sp | Q8IYB3 | SRRM1_HUMAN |
| 6084 | EGEETEGSEDDKENDK20000000000                          | sp | P49321 | NASP_HUMAN  |
| 6085 | SPFEHSVEHK20000000000                                | sp | 014646 | CHD1_HUMAN  |
| 6086 | EGMNPYDEYADSDQHDAYLER1. 002E+22                      | sp | Q08945 | SSRP1_HUMAN |
| 6087 | GSVSQPSTSPPKPTGIFQTSANSSFEVK2. 2E+24                 | sp | 015027 | SC16A_HUMAN |
| 6088 | RRSSPSARPPDVPQQPQAAK2. 2E+19                         | sp | Q96JP5 | ZFP91_HUMAN |
| 6089 | EWYQSTIPQSPAPDDPEEGR200000200000000000               | sp | Q08499 | PDE4D_HUMAN |
| 6090 | SGSPGSSSYEHYESR2020000000000000                      | sp | Q9P1Y6 | PHRF1_HUMAN |
| 6091 | RSPSPTPTGSPSR20200000000000                          | sp | P49450 | CENPA_HUMAN |
| 6092 | EPSSSLCSIDEEHLTDIEIVR2. 22E+20                       | sp | Q6GYQ0 | RGA1_HUMAN  |
| 6093 | SRGPTPPAMGPR2000200000000                            | sp | Q3KQU3 | MA7D1_HUMAN |
| 6094 | DGDSYDPYDFSDTEEMPQVHTPK2. 0000002000001E+21          | sp | P25205 | MCM3_HUMAN  |
| 6095 | RDSSSHEETPGSHPLYGHGECK2E+20                          | sp | Q8IVH2 | FOXP4_HUMAN |
| 6096 | ENIKPNETSPSFSK20000                                  | sp | Q99700 | ATX2_HUMAN  |
| 6097 | AGGGAQPSQTATGDPSDEDESDLEEFVR200000200000000          | sp | Q2YD98 | UVSSA_HUMAN |
| 6098 | LKSVEDEMDSPGEEPFTYTGQR2. 0000102E+20                 | sp | Q12857 | NFIA_HUMAN  |
| 6099 | YHGHSMSDPGVSYR1200002000                             | sp | P08559 | ODPA_HUMAN  |
|      |                                                      | sp | P29803 | ODPAT_HUMAN |
| 6100 | SPTPTVNPR20000000                                    | sp | Q8WY36 | BBX_HUMAN   |
| 6101 | KRTPSPSYQR202000000                                  | sp | Q5T200 | ZC3HD_HUMAN |
| 6102 | EKPELSEPHLNGPSSDPEAAFLSR2. 0000000002E+20            | sp | Q9H4A3 | WNK1_HUMAN  |
| 6103 | SPGQPSSLR2000000000                                  | sp | Q5T011 | SZT2_HUMAN  |
| 6104 | IETDEEESCDNAHGDNQPAR2. 00002E+19                     | sp | Q96T23 | RSF1_HUMAN  |
| 6105 | VASETHSEGSEYEELPK2000000000000000                    | sp | Q5JSZ5 | PRC2B_HUMAN |
| 6106 | TSPKPAVVETVTTAKPQQIQALMDEVTK2E+27                    | sp | P56192 | SYMC_HUMAN  |



|      |                                                         |    |        |             |
|------|---------------------------------------------------------|----|--------|-------------|
| 6107 | KPSVPDSASPADDSFVDPGER2E+19                              | sp | P16333 | NCK1_HUMAN  |
| 6108 | SRSSSVGSSSSYPISPAVSR200220000000000000                  | sp | Q15149 | PLEC_HUMAN  |
| 6109 | RSLSGSSPCPK20200200000                                  | sp | Q9UQ35 | SRRM2_HUMAN |
| 6110 | SPSWQRPNQGVSTGR200000000000000000                       | sp | Q96HC4 | PDLI5_HUMAN |
| 6111 | SLVHEVGKPPQDVTDDSPSK200000                              | sp | Q96T58 | MINT_HUMAN  |
| 6112 | GNSRPGTPSAEGGSTSSTLR200000000000000000                  | sp | P35269 | T2FA_HUMAN  |
| 6113 | TPTSTPVHVK20000000000                                   | sp | Q9ULM3 | YETS2_HUMAN |
| 6114 | ASVALTPTAPSR200                                         | sp | P28290 | SSFA2_HUMAN |
| 6115 | LLPSVWSESEDGAGSPPPYR2000002000000                       | sp | Q9UIS9 | MBD1_HUMAN  |
| 6116 | SQSSEGVSSLSPPSNSLETQSQSLSR2020000000000000              | sp | O95155 | UBE4B_HUMAN |
| 6117 | QLPALDGSLMGPEPQAQEEAPVSPHK2. 01E+21                     | sp | Q8N9T8 | KRI1_HUMAN  |
| 6118 | RPQSPSPR202000                                          | sp | Q99590 | SCAFB_HUMAN |
| 6119 | TEMKSPFNPSQDSR100200000000000000                        | sp | P08651 | NFIC_HUMAN  |
| 6120 | SGSDAGEARPPTPASPR200000000000000000                     | sp | Q96FS4 | SIPA1_HUMAN |
| 6121 | HKSGSMEEDVDTSPGGDYTSPSSPTSSSR2E+28                      | sp | P08651 | NFIC_HUMAN  |
| 6122 | IEIPVPTGQSVSPSPSIPGTPLK202000000000                     | sp | Q9H4Z3 | PCIF1_HUMAN |
| 6123 | IGSDPLAYEPK2000000000                                   | sp | P19634 | SL9A1_HUMAN |
| 6124 | ISSSSFSR200                                             | sp | P05787 | K2C8_HUMAN  |
| 6125 | LSPSWNPK20000000                                        | sp | Q96BY7 | ATG2B_HUMAN |
| 6126 | SSSPLPTVQLHPQSPTAGK200000000002000000                   | sp | O60245 | PCDH7_HUMAN |
| 6127 | DRSPIRGSPR200002000                                     | sp | Q9HCD5 | NCOA5_HUMAN |
| 6128 | FHSPSTTWSFNK20000000000                                 | sp | Q99590 | SCAFB_HUMAN |
| 6129 | TDSV I IADQTPPTR20000002020000                          | sp | P17544 | ATF7_HUMAN  |
| 6130 | DEDESGGQRSEAEQEVRTPTK2000020000000020000                | sp | Q9H4G0 | E41L1_HUMAN |
| 6131 | SLNLEDYKK2000000000                                     | sp | Q92541 | RTF1_HUMAN  |
| 6132 | KSNQIPTEVR2000000000                                    | sp | Q9BWH2 | FUND2_HUMAN |
| 6133 | IVVGSSVAPGNTAPSPSSPTSPTSDATTSLEMNPHAI PR22000000000000  | sp | P49757 | NUMB_HUMAN  |
| 6134 | SKSPSPPR200020000                                       | sp | Q9UKV3 | ACINU_HUMAN |
| 6135 | SQDQDSEVNELSR2000000000000000                           | sp | Q86VM9 | ZCH18_HUMAN |
| 6136 | GYTSDSEVYTDHGRPGK200000000000000000                     | sp | Q92538 | GBF1_HUMAN  |
| 6137 | KTESPIKLSPATPSR2000020000000                            | sp | Q9Y6X9 | MORC2_HUMAN |
| 6138 | TPPVALNSSR20000000200                                   | sp | Q9UQ35 | SRRM2_HUMAN |
| 6139 | ALEQQAESDSSDTEEKDDDDDEEDVGKR2. 02202E+22                | sp | Q9BXY0 | MAK16_HUMAN |
| 6140 | SFADIGKK200000000                                       | sp | Q9Y6M7 | S4A7_HUMAN  |
| 6141 | IKSSPSPEVVKPK20200000000                                | sp | Q6U841 | S4A10_HUMAN |
| 6142 | LLSGPSQESPQTLGK20000000                                 | sp | Q15652 | JHD2C_HUMAN |
| 6143 | VSGEELHTGPPAPQGPLSVPQGLPTQSLASPPAR200000                | sp | Q9BWE0 | REPI1_HUMAN |
| 6144 | VSSEELHTGPPAPQGPLSVPQGLPTQSLASPPAR200000                | sp | Q9UPN7 | PP6R1_HUMAN |
| 6145 | SYSSPDITQAIQEEER200000000000000000                      | sp | P40818 | UBP8_HUMAN  |
| 6146 | RQSPSPSTRPIR20000200000                                 | sp | Q8IYB3 | SRRM1_HUMAN |
| 6146 | LASPSGSTSSGLEVVAPEGTSAPGGGPGTLDDSATICR2. 0000000002E+29 | sp | Q13263 | TIF1B_HUMAN |
| 6147 | REESPMDVDQSPSAQDTQSIASDGTQGEK200000000000000000         | sp | Q7Z6Z7 | HUWE1_HUMAN |
|      |                                                         | sp | P05534 | 1A24_HUMAN  |
|      |                                                         | sp | Q09160 | 1A80_HUMAN  |
| 6148 | GGSYSQAASSDSAQGSVSLTACK20002000000000                   | sp | P30447 | 1A23_HUMAN  |
|      |                                                         | sp | P01891 | 1A68_HUMAN  |
|      |                                                         | sp | P01892 | 1A02_HUMAN  |
|      |                                                         | sp | P10316 | 1A69_HUMAN  |
| 6149 | AQGEPVAGHESPK2000                                       | sp | O94979 | SC31A_HUMAN |
| 6150 | EASPAPLAQGEPR2000000000000000                           | sp | Q9P1Y6 | PHRF1_HUMAN |
| 6151 | SRTSPVSR200200000                                       | sp | Q9UQ35 | SRRM2_HUMAN |
| 6152 | SHISDQSPSSK2000000                                      | sp | P42166 | LAP2A_HUMAN |

|      |                                                     |                       |
|------|-----------------------------------------------------|-----------------------|
| 6153 | ILSQSTDSLNR200000100                                | sp Q92974 ARHG2_HUMAN |
| 6154 | TASRPDDIPDPSPPK20000000022000                       | sp Q5VZK9 LR16A_HUMAN |
| 6155 | FESPATGILSPR2000                                    | sp P49792 RBP2_HUMAN  |
| 6156 | GTEPSPGGTPQPSRPVSPAGPPEGVPEEAQPPR2.000200000002E+29 | sp Q8WUZ0 BCL7C_HUMAN |
| 6157 | SILKPSTPIPPQEGEEVGESSEEQDNAPK2000000000             | sp Q9UDY2 ZO2_HUMAN   |
| 6158 | DAEYIYPSLESDDDDPALK2002000000000                    | sp Q9UPP1 PHF8_HUMAN  |
| 6159 | HSPIAPSSPSPQVLAQK20000020000000000                  | sp Q9NQS7 INCE_HUMAN  |
| 6160 | MALPPQEDATASPPR100000000020000                      | sp Q9UQ35 SRRM2_HUMAN |
| 6161 | SVSTTNIAGHFNDESPLGLR2000000000000000                | sp Q92974 ARHG2_HUMAN |
| 6162 | VDSSTNSSPSPQQSESLPAHTSDFR2000000000                 | sp Q9BQE9 BCL7B_HUMAN |
| 6163 | SAYQEYSDSDVPEELK20000000000                         | sp Q96JG6 CC132_HUMAN |
| 6164 | SSSSVTTSETQPCTPSSSDYDLQR2E+23                       | sp P50552 VASP_HUMAN  |
| 6165 | SPTPPSSAGLGSNSAPPIPDSR2200000000000000              | sp Q8IWX8 CHERP_HUMAN |
| 6166 | TSFDQSDVDIFPSDFPTEPPSLPR2E+19                       | sp Q02880 TOP2B_HUMAN |
| 6167 | TDALTSSPGR2220000                                   | sp P49736 MCM2_HUMAN  |
| 6168 | MAESPCSPSGQQPPSPSPDEL PANVK2.000000002E+19          | sp Q14160 SCRIB_HUMAN |
| 6169 | TESPATAAETAASELDNR20000000020000000                 | sp Q9NTJ3 SMC4_HUMAN  |
| 6170 | APLKYPVSPSPDK2000                                   | sp P41252 SYIC_HUMAN  |
| 6171 | NPEPDSDEHTPVEDEEPK20002000000000                    | sp Q8N5F7 NKAP_HUMAN  |
| 6172 | ASSPAESSPEDSGYMR2000020000000000                    | sp Q9Y4H2 IRS2_HUMAN  |
| 6173 | TAAGEYDSVSESEDEEMLEIR30002020000100000              | sp Q9BZE4 NOG1_HUMAN  |
| 6174 | SSSELVTHLK20000000000                               | sp Q07960 RHG01_HUMAN |
| 6175 | IPSAVSTVSMQNIHPK2002000000000                       | sp P19634 SL9A1_HUMAN |
| 6176 | GPSQEEEDNHSDEEDRASEPKSQDQDSEVNELSR2.00000020002E+24 | sp Q86VM9 ZCH18_HUMAN |
| 6177 | AIPVSPSAVEEDEDGHTVVATAR2E+19                        | sp Q07157 ZO1_HUMAN   |
| 6178 | ELSPAAL EK200000000                                 | sp 075683 SURF6_HUMAN |
| 6179 | AASVAAATTSPTPR200000                                | sp Q9Y2D9 ZN652_HUMAN |
| 6180 | TPNNVSTPAPSPDASQLASSLSSQK2.0002E+19                 | sp Q8WWI1 LM07_HUMAN  |
| 6181 | HCSTYQPTPPLSPASK200000                              | sp Q9GZR1 SENP6_HUMAN |
| 6182 | AALLAQYADVTDDEEADADEKDDSGATTMNGSDK2E+24             | sp Q96MW1 CCD43_HUMAN |
| 6183 | QSQQPMKPI SPVKDPVSPASQK100020000002000000           | sp Q12888 TP53B_HUMAN |
| 6184 | SVSEINSDEL SGK2020002000000000                      | sp P82094 TMF1_HUMAN  |
| 6185 | ACASPSAQVEGSPVAGSDGSQPAVK2000000000000000           | sp Q9UFC0 LRWD1_HUMAN |
| 6186 | SSQPSTPQQAPPQPQQGTFVAHK2E+20                        | sp Q86VM9 ZCH18_HUMAN |
| 6187 | TGVTSTSDSEEGDDQEGEKK220000000000000000              | sp 075475 PSIP1_HUMAN |
| 6188 | SPLSGIPVR2000000000                                 | sp Q5M775 CYTSB_HUMAN |
| 6189 | AGMSSNQSISSPVLDVAVPR20000000000                     | sp Q9UQ35 SRRM2_HUMAN |
| 6190 | SQSPHYFR202000000                                   | sp Q9UKJ3 GPTC8_HUMAN |
| 6191 | ERSPALK200000                                       | sp Q9Y2W1 TR150_HUMAN |
| 6192 | QQFSPSMTER20000000                                  | sp Q8TDB6 DTX3L_HUMAN |
| 6193 | AASDDGSLKSSSPTS YWK200020022000000000               | sp Q92614 MY18A_HUMAN |
| 6194 | MAPALSGANLTSR2000                                   | sp Q9UQ35 SRRM2_HUMAN |
| 6195 | SPTPPSSAGLGSNSAPPIPDSR220000200000000000            | sp Q8IWX8 CHERP_HUMAN |
| 6196 | THSFENVSCHLPDSR2000000000                           | sp Q5VZ89 DEN4C_HUMAN |
| 6197 | APKPPTDGSTSTPSEDQALGK200000000000000000             | sp Q8NHM5 KDM2B_HUMAN |
| 6198 | DSSTSYTETKDPSSGQEVATPPVQLQVCEPK3.00000002E+27       | sp Q9UKV3 ACINU_HUMAN |
| 6199 | LSPGESAYQK2000000000                                | sp Q6NYC8 PPR18_HUMAN |
| 6200 | SFSPKSPLELGEK20000200000000                         | sp Q15742 NAB2_HUMAN  |
| 6201 | RVSSDEEHTVDSCISDMK220000000000000000                | sp Q70CQ2 UBP34_HUMAN |
| 6202 | KSPVFSDESDLDFDISK200000002000000000                 | sp 000566 MPP10_HUMAN |
| 6203 | TSPD TLR2000000                                     | sp Q01130 SRSF2_HUMAN |
| 6204 | QQSFCAKPPSPLSPVPSVVK200200000000                    | sp Q70E73 RAPH1_HUMAN |
| 6205 | EHSLQVSPSLEK2000000                                 | sp 095235 KI20A_HUMAN |
| 6206 | VETVSPSESPKDTIDK2000000200000000                    | sp Q99590 SCAFB_HUMAN |

|      |                                                |                       |
|------|------------------------------------------------|-----------------------|
| 6207 | NEDESPNKLYTLVTVYVPVTTFK200000000000000000      | sp P62899 RL31_HUMAN  |
| 6208 | SPSPAVPLR2020000000                            | sp Q6P4R8 NFRKB_HUMAN |
| 6209 | SSHSLDYDKDR200000000                           | sp Q9UK61 F208A_HUMAN |
| 6210 | ASPITNDGEDEFVPSDGLDKDEYTFSPGK2E+28             | sp Q02880 TOP2B_HUMAN |
| 6211 | AVPTWASVQVDDPGSLASVESPGTPK2002000              | sp Q8IVT2 MISP_HUMAN  |
|      |                                                | sp P30510 1C14_HUMAN  |
|      |                                                | sp P04222 1C03_HUMAN  |
|      |                                                | sp Q07000 1C15_HUMAN  |
|      |                                                | sp Q29865 1C18_HUMAN  |
|      |                                                | sp Q29960 1C16_HUMAN  |
| 6212 | GGSCSQAASSNSAQGSDESLIACK2E+20                  | sp Q29963 1C06_HUMAN  |
|      |                                                | sp P30504 1C04_HUMAN  |
|      |                                                | sp P30508 1C12_HUMAN  |
|      |                                                | sp Q95604 1C17_HUMAN  |
|      |                                                | sp Q9TNN7 1C05_HUMAN  |
|      |                                                | sp P30505 1C08_HUMAN  |
| 6213 | SLKESEQESEEEILAQKK20000000200000000000         | sp Q9BW71 HIRP3_HUMAN |
| 6214 | EGMNPSTYDEYADSDQHDAYLER2E+19                   | sp Q08945 SSRP1_HUMAN |
| 6215 | ISSSSF2000000                                  | sp P05787 K2C8_HUMAN  |
| 6216 | SISGTSTSEKPNMMDTANTSPFK2E+23                   | sp Q9UJF2 NGAP_HUMAN  |
| 6217 | VLSSTSEDEPGVVK22020000000000                   | sp Q8NI08 NCOA7_HUMAN |
| 6218 | VADVLDVLENEVDEYSGSSEK30002000                  | sp P38398 BRCA1_HUMAN |
| 6219 | NHSGSRTPVALNSSR20200000000000                  | sp Q9UQ35 SRRM2_HUMAN |
| 6220 | GTDTQTPAVLSPSK200                              | sp P46087 NOP2_HUMAN  |
| 6221 | DMSLKDSGSDLSHRPK202000000000                   | sp O95251 KAT7_HUMAN  |
| 6222 | KESKEETSIDVAGKPNEVTK2000000000000000           | sp P53985 MOT1_HUMAN  |
| 6223 | RRSQSIEQESQEK20200000000000                    | sp Q5VTL8 PR38B_HUMAN |
| 6224 | RSDSFLNIFPEK20000000000000                     | sp O94854 K0754_HUMAN |
| 6225 | TEVPGSPAGTEGNCQATGPSTVDTQNEPLDMK2E+28          | sp Q32MZ4 LRRF1_HUMAN |
| 6226 | ASSLEDLVLK200000000000                         | sp Q15477 SKIV2_HUMAN |
| 6227 | KPPAPPSPVQSQSPSTNWSPAVPVKK2.00000002E+20       | sp Q8IYB3 SRRM1_HUMAN |
| 6228 | SPSDLHISPLAK20000200000                        | sp O95785 WIZ_HUMAN   |
| 6229 | TPQSPAPCVLLR200000000000                       | sp Q9Y613 FHOD1_HUMAN |
| 6230 | MIFEGPNKLSR2000                                | sp O94913 PCF11_HUMAN |
| 6231 | MLPHAPGVQMAIPEDAIPESGDEDEDPPDKR1.000000001E+33 | sp Q13547 HDAC1_HUMAN |
| 6232 | HPSSPSALR200000000                             | sp O60504 VINEX_HUMAN |
| 6233 | RASVRSSEEDAR2000220000000000                   | sp Q8NC56 LEMD2_HUMAN |
| 6234 | KIDAGTMAEPSASPSK20000                          | sp Q8IXQ3 CI040_HUMAN |
| 6235 | SLPAFPTSSLLTQSQK20000000000000000000           | sp Q99698 LYST_HUMAN  |
| 6236 | YMNSDTTSPELR200000                             | sp Q96ST3 SIN3A_HUMAN |
| 6237 | LSGINEIPRPFSPVTSNTSPPPAAPLAR220000000000       | sp Q0JRZ9 FCHO2_HUMAN |
|      |                                                | sp Q641Q2 FA21A_HUMAN |
| 6238 | SRPTSFADLAAR2000000000000000                   | sp Q5SNT6 FA21B_HUMAN |
|      |                                                | sp Q9Y4E1 FA21C_HUMAN |
| 6239 | EDELMEFSDLESDSEEKPCAKPR200020000000000000      | sp Q9P2D1 CHD7_HUMAN  |
| 6240 | SPVGKSPSTGTYGSSQK2E+19                         | sp Q9Y2W1 TR150_HUMAN |
| 6241 | YSSQDADEQDWEFQK2000000000000000                | sp Q9C0C2 TB182_HUMAN |
| 6242 | TVDSQGPTPVCTPTFLER200020002000000000           | sp Q9BYG3 MK67I_HUMAN |
| 6243 | VETVSPSESPKDTIDK200000000000                   | sp Q99590 SCAFB_HUMAN |
| 6244 | RIPSIVSSPLNSPLDR2000200000                     | sp P49790 NU153_HUMAN |
| 6245 | LSVSSNDTQESGNSSGSPGAK200000000000000000        | sp Q9Y6D6 BIG1_HUMAN  |
| 6246 | EIPEDVDMEEKESEDSDEENDFTEK1.000002002E+19       | sp Q8IWA0 WDR75_HUMAN |
| 6247 | SSSESEDEDVIPATQCLTPGIR2.22202E+23              | sp Q13428 TCOF_HUMAN  |
| 6248 | AATAARPPAPPAPQPPSPTSPRPTLAR20000000020000      | sp Q96B36 AKTS1_HUMAN |

|      |                                                     |                       |
|------|-----------------------------------------------------|-----------------------|
| 6249 | FSDSEDEAATVPGNEPTTASTPK2. 02E+22                    | sp Q8N1G1 REX01_HUMAN |
| 6250 | SGTNSPPPPFSDWGR2000000000000                        | sp Q9UKT5 FBX4_HUMAN  |
| 6251 | GDMSDEDDENEFFDAPEIITMPENLGHK1. 2E+26                | sp P22059 OSBP1_HUMAN |
| 6252 | EADIDSSDESIEEDIDQPSAHK2002000000000000              | sp Q9P2I0 CPSF2_HUMAN |
| 6253 | SSLGQSASETEEDTVSVSK20000000000                      | sp Q13435 SF3B2_HUMAN |
| 6254 | SKSPPKSPREEEGAVSS2020000000000000                   | sp Q01130 SRSF2_HUMAN |
| 6255 | ELASPVSPELR200000000                                | sp Q5T4S7 UBR4_HUMAN  |
| 6256 | KPVTVSPTTPTSPTTEGEAS2200000000                      | sp Q9Y6G9 DC1L1_HUMAN |
| 6257 | TGQAGSLSGSPKPFSPQLSAPITTK2020000200000000000        | sp Q9ULU4 PKCB1_HUMAN |
| 6258 | DGDSYDPYDFSDTEEEMPQVHTPK2. 0003000000001E+21        | sp P25205 MCM3_HUMAN  |
| 6259 | NSLSDPNIDR2000000000                                | sp Q9NRY4 RHG35_HUMAN |
| 6260 | GSPLLGPVVPGPSPIPSVTEK2. 00000000002E+20             | sp P49454 CENPF_HUMAN |
| 6261 | DDSFDSLDSFGSR200000000000                           | sp Q9UPQ0 LIMC1_HUMAN |
| 6262 | TDSTSDGRPAWMR200000000000                           | sp Q14204 DYHC1_HUMAN |
| 6263 | EHYPVSSPSSPSPAQGGVSR2202000000000000000             | sp 075179 ANR17_HUMAN |
| 6264 | TPTSPLSPSSQK20002000000                             | sp Q5VT06 CE350_HUMAN |
| 6265 | TPSPPPPPIEDIALGK2000000000000000                    | sp Q5T200 ZC3HD_HUMAN |
| 6266 | SCFESSDPPELK20000000                                | sp Q9UQ35 SRRM2_HUMAN |
| 6267 | TENSLANENQQPIKSEPESEGEPEK200020000000               | sp Q8NHM5 KDM2B_HUMAN |
| 6268 | SLPASPSTSDFCQTR2000200000000000                     | sp Q9Y2D8 ADIP_HUMAN  |
| 6269 | DSSSTDSANEKPALIPR2202000000000000                   | sp Q9NUQ6 SPS2L_HUMAN |
| 6270 | KPSSSLR2200000                                      | sp Q13029 PRDM2_HUMAN |
| 6271 | SNSFSDER202000000                                   | sp Q09666 AHNK_HUMAN  |
| 6272 | IDSNISPK2000                                        | sp Q9H501 ESF1_HUMAN  |
| 6273 | RRSPSPPTR200000000                                  | sp Q8IYB3 SRRM1_HUMAN |
| 6274 | APVPSTCSSTFPEELSPSHQAK200000000                     | sp Q14980 NUMA1_HUMAN |
| 6275 | VNSNGKESPGSSEFFQEAVSHGK2. 00000002E+21              | sp Q8N108 MIER1_HUMAN |
| 6276 | KTSAVSSPLLDQQR2200000000                            | sp Q5T200 ZC3HD_HUMAN |
| 6277 | TRDDGDEGLLTHSEEELEHSQDTDADDGALQ2000000000           | sp Q9UKM9 RALY_HUMAN  |
| 6278 | SFGNPFEPQAR200000000000                             | sp Q8N5S9 KKCC1_HUMAN |
| 6279 | SSSFSELCHR2200000000                                | sp Q5T8I3 F102B_HUMAN |
| 6280 | GYSSPEPDIQDSSGSEAQSVKPSTR2. 200000002202E+23        | sp Q9BZF1 OSBL8_HUMAN |
| 6281 | LEDAESSNPNLQSLSTDALPSASK20020000000000              | sp Q9Y294 ASF1A_HUMAN |
| 6282 | DDPFTQPDQSTPSSFDLSPDQK200000                        | sp P98082 DAB2_HUMAN  |
| 6283 | ESAAPASPAPSPAPSPPTAPPQK2. 000000002E+22             | sp Q3KQU3 MA7D1_HUMAN |
| 6284 | SNSPLVPVPSK200000000000                             | sp Q13247 SRSF6_HUMAN |
| 6285 | EVEEDESEDEEMSEDEEDDSSGEEVVPQKK2. 00001200000022E+25 | sp P19338 NUCL_HUMAN  |
| 6286 | THSTSSSLGSGESPFSTR200200000000                      | sp Q9UGV2 NDRG3_HUMAN |
| 6287 | QSHSGSISPYPK200000200000                            | sp Q9UQ35 SRRM2_HUMAN |
| 6288 | RRSPSPTPTGPSR202000000000                           | sp P49450 CENPA_HUMAN |
| 6289 | AISAPTSPTR20000                                     | sp Q9NQG6 MID51_HUMAN |
| 6290 | ESGRPIKPPR2000000000                                | sp P25440 BRD2_HUMAN  |
| 6291 | RSLSPLGGR202000000                                  | sp Q14004 CDK13_HUMAN |
| 6292 | AYSPTCSPTLGFK3000020000000                          | sp Q5TGY3 AHDC1_HUMAN |
| 6293 | GSKESLVPQR2000000000                                | sp 095835 LATS1_HUMAN |
| 6294 | IDFTPVSAPSPTR200020000                              | sp Q7Z309 F122B_HUMAN |
| 6295 | HSHSHSPMSTR202000000                                | sp P62995 TRA2B_HUMAN |
| 6296 | YSPSQNSPIHHIPSR2000020000000000                     | sp Q9NYF8 BCLF1_HUMAN |
| 6297 | TVFSPTLPAAR200000000                                | sp Q7Z2W4 ZCCHV_HUMAN |
| 6298 | SKTPPPPPQTAQTK2000000000000000                      | sp P25054 APC_HUMAN   |
| 6299 | DPSPEADAPVLGSPEKEEAASEPPAAAPDAAPPPDRPIEK2E+39       | sp 015234 CASC3_HUMAN |
| 6300 | HTGPNSPDTANDGFVR200000000                           | sp P31943 HNRH1_HUMAN |
| 6301 | QPPGVPNGPSSPTNESAPELPQR200000000000                 | sp P55795 HNRH2_HUMAN |
|      |                                                     | sp Q8TF74 WIPF2_HUMAN |

|      |                                                   |                       |
|------|---------------------------------------------------|-----------------------|
| 6302 | ALFKPPEDSQDDESDSDAEEEEQTTK200000020000000000      | sp Q13769 THOC5_HUMAN |
| 6303 | TLSPEFNER20000000                                 | sp Q9BSJ8 ESYT1_HUMAN |
| 6304 | SAQGSSSPVPSMVQK2000000000                         | sp P35658 NU214_HUMAN |
| 6305 | TPLSEAEFEEIMNR2000000000000000                    | sp Q16630 CPSF6_HUMAN |
| 6306 | SQGDEAGGHGEDRPEPLSPK2000                          | sp Q9NZT2 OGFR_HUMAN  |
| 6307 | RGSPSPPR2020000                                   | sp Q5VUA4 ZN318_HUMAN |
| 6308 | LYNSEESRPYTNK2000                                 | sp Q9NYV4 CDK12_HUMAN |
| 6309 | HQASDSENEELPKPR20000000000000                     | sp Q96ST2 IWS1_HUMAN  |
| 6310 | ASSPTKTSPTTPEASATNSPCTSKPATPAPSEK2. 202E+27       | sp Q12873 CHD3_HUMAN  |
| 6311 | TSSLTQFPSPQSEER2000000000000000                   | sp Q9H6Z4 RANB3_HUMAN |
| 6312 | SLLSHEFQDETDTTEEETLYSSKH2020000000000000          | sp 075976 CBPD_HUMAN  |
| 6313 | STSAPQMSPGSSDNQSSSPQPAQQK1. 00022E+19             | sp Q14157 UBP2L_HUMAN |
| 6314 | TEDGGEFEEGASENNAKESSEPEKEAEEGCPK2. 0000002E+21    | sp 043719 HTSF1_HUMAN |
| 6315 | GGSPDLWK2000000                                   | sp Q96JM3 CHAP1_HUMAN |
| 6316 | IPSFPPSPEPPSPSAPSIAK20000000000                   | sp Q12802 AKP13_HUMAN |
| 6317 | RPACDPEPGESGSSSDEGCTVVRPEK200220000000000000      | sp 015541 R113A_HUMAN |
| 6318 | SVPGTTSSPLVGDISP2000                              | sp Q9UQR0 SCML2_HUMAN |
| 6319 | SVCGHLENTSVGNPNPSSAENSFR200020002000000000        | sp Q96HH9 GRAM3_HUMAN |
| 6320 | SGTPPRQGSITSPQANEQSVTPQR2. 02000002E+24           | sp Q9UQ35 SRRM2_HUMAN |
| 6321 | KRSPSPSPTPEAK202000200000                         | sp Q8TAQ2 SMRC2_HUMAN |
| 6322 | KNSTGSGHSAQELPTIR200000000000000000               | sp 094763 RMP_HUMAN   |
| 6323 | YTPTSPSYSPSSPEYTPSPK200000000000000000            | sp P24928 RPB1_HUMAN  |
| 6324 | NNSNTCNIENELEDSR200000000000000000                | sp Q6PL18 ATAD2_HUMAN |
| 6325 | RASPPDPSPSAASASER20000202000000000000             | sp Q9Y2F5 ICE1_HUMAN  |
| 6326 | DEIEGLSSDEEH2200000                               | sp Q6PD74 AAGAB_HUMAN |
| 6327 | EIAIVHSDAEKEQEEEEQK200000000000000000             | sp Q9H307 PININ_HUMAN |
| 6328 | VSPAPGSAPETPEDK2000002000200000                   | sp Q13459 MYO9B_HUMAN |
| 6329 | EQLSETEGSGEDEPGNDPSETTQK2. 02E+21                 | sp Q13107 UBP4_HUMAN  |
| 6330 | GYNHGQGSYSNSYNSPGGGGSDYNYESK200000000000000000    | sp Q12906 ILF3_HUMAN  |
| 6331 | SPGNKSDNIKPK20000200000000                        | sp Q16637 SMN_HUMAN   |
| 6332 | TVFPGAVPVLASPPPK200000                            | sp Q9UBC2 EP15R_HUMAN |
| 6333 | EGSIETLSNSSGSTSGSIPR20000000000000000000          | sp Q9H6U6 BCAS3_HUMAN |
| 6334 | YPLCSADAAVSTTPPGSPPPPPLPEPPVLK2. 02E+21           | sp Q9BTC0 DIDO1_HUMAN |
| 6335 | SPLSDYMNLDLFSSPK2000001000002000                  | sp Q9Y4H2 IRS2_HUMAN  |
| 6336 | FSEMMNMGDEDVDLPEVDGADDDSDSDEK1. 001E+29           | sp Q15185 TEBP_HUMAN  |
| 6337 | RQPQQGESEGSSEDEDGSRPLTR200222000000000000         | sp Q6ZRS2 SRCAP_HUMAN |
| 6338 | RTDALTSPPGR2020000                                | sp P49736 MCM2_HUMAN  |
|      |                                                   | sp P30505 1C08_HUMAN  |
|      |                                                   | sp Q9TNN7 1C05_HUMAN  |
|      |                                                   | sp Q29960 1C16_HUMAN  |
|      |                                                   | sp Q07000 1C15_HUMAN  |
|      |                                                   | sp Q29963 1C06_HUMAN  |
| 6339 | GGSCSQAASSNSAQGSDESLIACK2000000000                | sp P30508 1C12_HUMAN  |
|      |                                                   | sp Q95604 1C17_HUMAN  |
|      |                                                   | sp P30510 1C14_HUMAN  |
|      |                                                   | sp P04222 1C03_HUMAN  |
|      |                                                   | sp Q29865 1C18_HUMAN  |
|      |                                                   | sp P30504 1C04_HUMAN  |
| 6340 | RISSSSVQPCSEEVSTPQDSLQCK2E+20                     | sp P42694 HELZ_HUMAN  |
|      |                                                   | sp P20700 LMNB1_HUMAN |
| 6341 | LKLSPSPSSR20200000                                | sp Q03252 LMNB2_HUMAN |
|      |                                                   | sp P19338 NUCL_HUMAN  |
| 6342 | AAAAAPASEDEDEDDEDDEDDEDDEDDDEEDDSEEEAMETTPAK2E+34 | sp Q9Y2F5 ICE1_HUMAN  |
| 6343 | SCSSPAVSAVQLPLSPK20000000000000000000             | sp 095684 FR10P_HUMAN |
| 6344 | GPTTGEGALDLSDVHSPPKSPEGK2E+21                     |                       |

|      |                                                        |           |             |
|------|--------------------------------------------------------|-----------|-------------|
| 6345 | AGLGSPPERPKTSPGSPR22000000                             | sp Q9H6F5 | CCD86_HUMAN |
| 6346 | TSAQHALTSVSR20000                                      | sp P61073 | CXCR4_HUMAN |
| 6347 | SPEPDTLPLAAGSDHPLPR2E+19                               | sp Q6PCT2 | FXL19_HUMAN |
| 6348 | HPSSPSALR22000000                                      | sp O60504 | VINEX_HUMAN |
| 6349 | SGSTSPLGFAR2020000000                                  | sp O75385 | ULK1_HUMAN  |
| 6350 | SSFSSDPDEK2000000000                                   | sp P46013 | KI67_HUMAN  |
| 6351 | TRTPASINATPANINLADLTR2.0000002E+19                     | sp Q7KZ85 | SPT6H_HUMAN |
| 6352 | SFHFDPPLSSGSR200                                       | sp Q9C0B5 | ZDHC5_HUMAN |
| 6353 | AVGSPLCVPAR200000000                                   | sp Q9NYZ3 | GTSE1_HUMAN |
| 6354 | RREEGPPPPSPDGASSDAEPEPPSGR2000020000000000000          | sp Q9NTJ3 | SMC4_HUMAN  |
| 6355 | TSQEELLAEVVQGQSR2000000000000000                       | sp Q6PJT7 | ZC3HE_HUMAN |
| 6356 | RPPSQSLTSSSLSSPDIFDPSPEEDKEEHISLAHR2020000000000000000 | sp Q96B97 | SH3K1_HUMAN |
| 6357 | SNVSSPATPTASSSSSTPTR200000                             | sp Q12888 | TP53B_HUMAN |
| 6358 | AIPGDQHPESPVHTEPMGIQGR2000000000000000                 | sp Q14676 | MDC1_HUMAN  |
| 6359 | ANSIGSTSASSVPNTDDEDSYHQEAYK2.002E+26                   | sp Q9UH92 | MLX_HUMAN   |
| 6360 | TPSDDEEDNLFAPPK2020000000000000                        | sp Q9Y4E1 | FA21C_HUMAN |
| 6361 | DMHCLEASSPTFSK2000000                                  | sp Q641Q2 | FA21A_HUMAN |
| 6362 | TDSREDEISPPPNPVVK20000000000000000000                  | sp Q7Z333 | SETX_HUMAN  |
| 6363 | SPSESSPQHPTTPARPR20020000000000000000                  | sp P10644 | KAPO_HUMAN  |
| 6364 | RLGPSESR20200                                          | sp O14733 | MP2K7_HUMAN |
| 6365 | STSAPQMSPGSSDNQSSSPQPAQQK1.00002E+19                   | sp Q8NGJ1 | OR4D6_HUMAN |
| 6366 | KGGSYSQAASSDSAQGSVSLTACK20002002000000                 | sp Q14157 | UBP2L_HUMAN |
| 6367 | VAETHSEGSEYEELPK2000000000000000                       | sp Q09160 | 1A80_HUMAN  |
| 6368 | SLHSAHSLASR200000200000                                | sp P05534 | 1A24_HUMAN  |
| 6369 | QQSLPSLCSTSDPDTPLGAPSTPGR2.002002E+23                  | sp P30447 | 1A23_HUMAN  |
| 6370 | LLPPASP200                                             | sp P01891 | 1A68_HUMAN  |
| 6371 | TRNSGIWESPELDR200000000000                             | sp P01892 | 1A02_HUMAN  |
| 6372 | RLSSGKADGHVK22000000000                                | sp P10316 | 1A69_HUMAN  |
| 6373 | LSPSPSSR200000                                         | sp Q5JSZ5 | PRC2B_HUMAN |
| 6374 | NSPPPPGR20000000                                       | sp O15027 | SC16A_HUMAN |
| 6375 | KKSPIINESR200000000                                    | sp Q8TF72 | SHRM3_HUMAN |
| 6376 | FSPHPSPAK200020000                                     | sp Q9Y4R8 | TELO2_HUMAN |
| 6377 | AEDQTESSCESHR20000000                                  | sp O15085 | ARHGB_HUMAN |
| 6378 | ECSPTSSLER200000000                                    | sp O75962 | TRIO_HUMAN  |
| 6379 | SVPSSLQASAR200000000000                                | sp P20700 | LMNB1_HUMAN |
| 6380 | SQSPHYFR2000000                                        | sp Q03252 | LMNB2_HUMAN |
| 6381 | YTPTSPSYSPSPEYTPSPK22000000000000000000                | sp Q96ER3 | SAAL1_HUMAN |
| 6382 | GGSYSQAASSDSAQGSVSLTACK3.000000000002E+21              | sp Q13523 | PRP4B_HUMAN |
| 6383 | LSPATPTSEGPK200200000000                               | sp O14681 | EI24_HUMAN  |
| 6384 | GPPSPAPVMHSPSR2000000000200                            | sp Q9BU76 | MMTA2_HUMAN |
| 6385 | SSSNDVDEETAESDTSPVLEK2000000000000000000               | sp Q9P1Y6 | PHRF1_HUMAN |
|      |                                                        | sp P83369 | LSM11_HUMAN |
|      |                                                        | sp Q9UKJ3 | GPTC8_HUMAN |
|      |                                                        | sp P24928 | RPB1_HUMAN  |
|      |                                                        | sp P01891 | 1A68_HUMAN  |
|      |                                                        | sp P01892 | 1A02_HUMAN  |
|      |                                                        | sp P05534 | 1A24_HUMAN  |
|      |                                                        | sp Q09160 | 1A80_HUMAN  |
|      |                                                        | sp P10316 | 1A69_HUMAN  |
|      |                                                        | sp P30447 | 1A23_HUMAN  |
|      |                                                        | sp Q8N1G0 | ZN687_HUMAN |
|      |                                                        | sp Q13573 | SNW1_HUMAN  |
|      |                                                        | sp Q99590 | SCAFB_HUMAN |

|      |                                                  |                       |
|------|--------------------------------------------------|-----------------------|
| 6386 | VPPPALS200                                       | sp Q14152 EIF3A_HUMAN |
| 6387 | AAPEASSPPASPLQHLLPGK2000000000000000             | sp Q96TA1 NIBL1_HUMAN |
| 6388 | RSFSISPSR202000200                               | sp P18583 SON_HUMAN   |
| 6389 | HDTDPSPR20002000                                 | sp Q9BRD0 BUD13_HUMAN |
| 6390 | DSFDDRGPVLDYDHGSR2000000000000000                | sp P43243 MATR3_HUMAN |
| 6391 | DEPQTVDPVPSFGESPLSPIDMTQER200020001000000        | sp P17535 JUND_HUMAN  |
| 6392 | GGHSSVSTESESSSFHSS2200000000000000               | sp P61073 CXCR4_HUMAN |
| 6393 | RSPSPTTPGSPSR20002000000000                      | sp P49450 CENPA_HUMAN |
| 6394 | SKPIPIIMPASPQK20000                              | sp 000429 DNM1L_HUMAN |
| 6395 | SWDSSSPVDRPEPEAASPTTR2E+21                       | sp Q86WB0 NIPA_HUMAN  |
| 6396 | KAASPSQSVR200002000                              | sp Q8IYB3 SRRM1_HUMAN |
|      |                                                  | sp P60709 ACTB_HUMAN  |
|      |                                                  | sp P63261 ACTG_HUMAN  |
|      |                                                  | sp Q562R1 ACTBL_HUMAN |
|      |                                                  | sp Q9BYX7 ACTBM_HUMAN |
| 6397 | SYELPDGQVITIGNER200000000000000000               | sp A5A3E0 POTEF_HUMAN |
|      |                                                  | sp Q6S8J3 POTEE_HUMAN |
|      |                                                  | sp P62736 ACTA_HUMAN  |
|      |                                                  | sp P63267 ACTH_HUMAN  |
|      |                                                  | sp P68032 ACTC_HUMAN  |
|      |                                                  | sp P68133 ACTS_HUMAN  |
| 6398 | GASSPYGAPGTPR2000000000000000                    | sp Q5UIP0 RIF1_HUMAN  |
| 6399 | VAHSDKPGSTSTASFR2000                             | sp Q9P0L0 VAPA_HUMAN  |
| 6400 | LMHNASDSEVDQDDVVEWK2000000000000000              | sp Q9H2P0 ADNP_HUMAN  |
| 6401 | TPESQPDTPPGTPLVSQDEK2000000000000000             | sp Q96T60 PNKP_HUMAN  |
| 6402 | NTDVAQSPEAPK20000000                             | sp Q9P2E9 RRBP1_HUMAN |
| 6403 | ISPIQKPGGLDPVEILQER20000000000000000000          | sp P51531 SMCA2_HUMAN |
| 6404 | GSYGSDAEEEEYR200000000000                        | sp Q9UDY2 ZO2_HUMAN   |
|      |                                                  | sp P05534 1A24_HUMAN  |
|      |                                                  | sp P30447 1A23_HUMAN  |
| 6405 | KGGSYSQAASSDSAQGSVSLTACK2000000000               | sp P01891 1A68_HUMAN  |
|      |                                                  | sp P01892 1A02_HUMAN  |
|      |                                                  | sp Q09160 1A80_HUMAN  |
|      |                                                  | sp P10316 1A69_HUMAN  |
| 6406 | EVEEDSEDEEMSEDEEDDSSGEEVVIPQK2.0000200000002E+24 | sp P19338 NUCL_HUMAN  |
| 6407 | SPQPESFK2000000000                               | sp P46013 KI67_HUMAN  |
| 6408 | TKSPTDDEVTPSAVVR2000000000000000                 | sp Q9Y2H5 PKHA6_HUMAN |
| 6409 | MSQGPSPKTPTPSTPGDTQPNTPAPVPPAEDGIK2.002E+29      | sp Q14839 CHD4_HUMAN  |
| 6410 | LTSQSEAMALQSIR2000000000000000                   | sp Q9UPQ3 AGAP1_HUMAN |
| 6411 | RLSSASTGKPLSVEDDFEK20000000000000000000          | sp 075152 ZC11A_HUMAN |
| 6412 | EELTPGAPQHQLPPVPGSPEPYPGQQAPGPEPSQPLLELTPR2E+25  | sp Q9H6F5 CCD86_HUMAN |
| 6413 | MYSFDDVLEEGK1020000000000000                     | sp Q8WWI1 LMO7_HUMAN  |
| 6414 | GYTSDDDTWEPEIHLEDCK2000000000000000              | sp Q99549 MPP8_HUMAN  |
| 6415 | NKKSPEIHR20000000                                | sp Q9Y2W1 TR150_HUMAN |
| 6416 | HPSSPSALR20000000                                | sp 060504 VINEX_HUMAN |
| 6417 | HSLSGSSPGMK20000000                              | sp Q9UQ35 SRRM2_HUMAN |
| 6418 | DWQDDQSDNQSDYSVASEEGDEFDER2.0002002002E+21       | sp Q14839 CHD4_HUMAN  |
| 6419 | SSSVTTSETQPCTPSSSDYSDLQR2E+24                    | sp P50552 VASP_HUMAN  |
| 6420 | SASSDTSEELNSQDSPPK20200000000000000000           | sp 014745 NHRF1_HUMAN |
| 6421 | SSDQDSTNKEAEAAGVKPAGVRPR2.0002E+23               | sp Q92625 ANS1A_HUMAN |
| 6422 | RQSVSGLHR2000000000                              | sp Q8N1G4 LRC47_HUMAN |
| 6423 | YTPTSPSYSPSSPEYTPSPK20200000000000000000         | sp P24928 RPB1_HUMAN  |
| 6424 | AQLEPVASPAK200000                                | sp Q15149 PLEC_HUMAN  |
| 6425 | LVSFHDDSDEDLLHI2000020000000000                  | sp P11717 MPRI_HUMAN  |

|      |                                                            |                       |
|------|------------------------------------------------------------|-----------------------|
| 6426 | LDSSIISEGK20020000                                         | sp P30260 CDC27_HUMAN |
| 6427 | TGPPPIPSK20000                                             | sp Q14135 VGLL4_HUMAN |
| 6428 | LSSDLTR200000                                              | sp Q7Z6E9 RBBP6_HUMAN |
| 6429 | LGSTGSQPNSEAESVPENVPKPLLPPK2.02E+25                        | sp Q8IZ21 PHAR4_HUMAN |
| 6430 | MQNTDDEERPQLSDDER100200000000200000                        | sp Q8WVC0 LEO1_HUMAN  |
| 6431 | LASDDRSPPR20000                                            | sp P98175 RBM10_HUMAN |
| 6432 | AILGSYSELTPAEYSPQLTR2000000                                | sp Q9Y6D9 MD1L1_HUMAN |
| 6433 | VEQATKPSFER20000                                           | sp Q96E39 RMXL1_HUMAN |
| 6434 | WKAEGHSDDESSEGSSESTSR200020200200000000                    | sp Q9P289 STK26_HUMAN |
| 6435 | SSSPELVTHLK220000000000                                    | sp Q07960 RHG01_HUMAN |
| 6436 | YRSPYSGPK20000000                                          | sp Q14498 RBM39_HUMAN |
| 6437 | GPSLNPVLDYDHGSR200                                         | sp P43243 MATR3_HUMAN |
| 6438 | GSETGSETHESDLAPSDK2000002000000000000                      | sp P48634 PRC2A_HUMAN |
| 6439 | NDHLTSTSSPGVIVPESENK2000000000000000000                    | sp O75496 GEMI_HUMAN  |
| 6440 | ESCSSPSTVGSSLTTR2000000000000                              | sp Q7Z589 EMSY_HUMAN  |
| 6441 | TVSTSSQPEENVDR22000000000                                  | sp P42684 ABL2_HUMAN  |
| 6442 | QQQLEEEAAKPEPEKPVSPPPVEQK200000000                         | sp O75376 NCOR1_HUMAN |
| 6443 | SPSPAVPLR20000000                                          | sp Q6P4R8 NFRKB_HUMAN |
|      |                                                            | sp Q29960 1C16_HUMAN  |
|      |                                                            | sp Q9TNN7 1C05_HUMAN  |
|      |                                                            | sp Q07000 1C15_HUMAN  |
|      |                                                            | sp Q29963 1C06_HUMAN  |
|      |                                                            | sp P30505 1C08_HUMAN  |
| 6444 | GGSCSQAASSNSAQGSDESLIACK2000000000                         | sp P30508 1C12_HUMAN  |
|      |                                                            | sp Q95604 1C17_HUMAN  |
|      |                                                            | sp P04222 1C03_HUMAN  |
|      |                                                            | sp Q29865 1C18_HUMAN  |
|      |                                                            | sp P30504 1C04_HUMAN  |
|      |                                                            | sp P30510 1C14_HUMAN  |
| 6445 | RATGDGSSPELPSLER2000220000000000                           | sp Q9H2Y7 ZN106_HUMAN |
| 6446 | TEPAAEAEAAASGPSESPSPAEEELPGSHAEPVPAQGEAPGEQAR2.0020202E+36 | sp P55884 EIF3B_HUMAN |
| 6447 | KRESESEDETTPAAPQLIK2000000200000000000                     | sp O60832 DKC1_HUMAN  |
| 6448 | VATIQQCQSPTNYLQGLDGKPIIAAPVFTK2E+22                        | sp Q86TC9 MYPN_HUMAN  |
| 6449 | TQMAEVLPSPR1000002000                                      | sp P11388 TOP2A_HUMAN |
| 6450 | YGPADVEDTTGSGATDSKDDDDIDLFGSDDEESEEAKR2E+30                | sp P24534 EF1B_HUMAN  |
| 6451 | TSSTCSNESLSVGGTSVTPR2000000000000000000                    | sp O60343 TBCD4_HUMAN |
| 6452 | DQPDGSSLSPAQSPSQSPPAASSLR2.02E+20                          | sp Q6WCQ1 MPRIP_HUMAN |
| 6453 | SVTSNQSDGTQESCESPDVLR20000000                              | sp Q9UGV2 NDRG3_HUMAN |
| 6454 | MQSLQLDCVAVPSSR1020000000002000                            | sp Q13546 RIPK1_HUMAN |
| 6455 | SASASHQADIK202000000000                                    | sp Q14739 LBR_HUMAN   |
| 6456 | SPAHTPLSR200                                               | sp Q6P4Q7 CNNM4_HUMAN |
| 6457 | FQTGNKSPEVLR2000000                                        | sp Q96S66 CLCC1_HUMAN |
| 6458 | QSHSEPSLQSK2000000000                                      | sp Q9UQ35 SRRM2_HUMAN |
| 6459 | ALFKPPEDSQDDESDDAEQQTTKR2000000200000000000                | sp Q13769 THOC5_HUMAN |
| 6460 | SRSGSSQELDVKPSASPQER2002000000000000000                    | sp Q9UQ35 SRRM2_HUMAN |
| 6461 | SSSESEDEDVIPATQCLTPGIR2.2202E+22                           | sp Q13428 TCOF_HUMAN  |
| 6462 | NLVSPAYCTQESR20000000000                                   | sp Q9NUQ3 TXLNG_HUMAN |
| 6463 | IEEVLSPEGSPSK200020000                                     | sp Q9UEY8 ADDG_HUMAN  |
| 6464 | LEISPDSSPER200220000                                       | sp Q99959 PKP2_HUMAN  |
| 6465 | SDSLLSFR2000000                                            | sp Q00587 BORG5_HUMAN |
| 6466 | DSFSHSPGAVSSLK2000000000                                   | sp Q9H6R7 CBO44_HUMAN |
| 6467 | RPSVGSQSNQAGQGK20000000000                                 | sp Q9UPP1 PHF8_HUMAN  |
| 6468 | SGSMEEDVDTSPGGDYTSPSSPTSSSR1.00000000003E+25               | sp P08651 NFIC_HUMAN  |



|      |                                                        |                       |
|------|--------------------------------------------------------|-----------------------|
| 6469 | ERPDLEAPAPGSPFR20000                                   | sp Q9NQT8 KI13B_HUMAN |
| 6470 | QSSTPSAPELGQQPDVNISEWK200000000000000000               | sp Q93100 KPBB_HUMAN  |
| 6471 | ELEKPIQSKPQSPVIQAAAVSPK2000                            | sp Q9Y6D5 BIG2_HUMAN  |
| 6472 | KPEKPLFSSASPQDSSPR200002000                            | sp 000712 NFIB_HUMAN  |
| 6473 | GAGDGSDEEVDGKADGAEAKPAE200000000000000000              | sp P35579 MYH9_HUMAN  |
| 6474 | SVSEHTSCPAESASDAAPLQR200000000000000000                | sp Q8WUA7 TB22A_HUMAN |
| 6475 | SINKLSDPDPFK2000002000000                              | sp P42566 EPS15_HUMAN |
| 6476 | ISSKSPGHMVILDQTK2002000100000000                       | sp Q9NWH9 SLTM_HUMAN  |
| 6477 | VQTTPSKPGGDR2000000000                                 | sp Q12834 CDC20_HUMAN |
| 6478 | TPSPGPVESK20200000000                                  | sp Q5T0W9 FA83B_HUMAN |
| 6479 | VSPENLVDK200000000                                     | sp 075376 NCOR1_HUMAN |
| 6480 | SPSLDNPTFPNLPSENPLK2E+21                               | sp Q14653 IRF3_HUMAN  |
|      |                                                        | sp P01891 1A68_HUMAN  |
|      |                                                        | sp P10316 1A69_HUMAN  |
| 6481 | GGSYSQAASSDSAQGSVSLTACK2000000                         | sp P01892 1A02_HUMAN  |
|      |                                                        | sp P05534 1A24_HUMAN  |
|      |                                                        | sp P30447 1A23_HUMAN  |
|      |                                                        | sp Q09160 1A80_HUMAN  |
| 6482 | RHSHSHSPMSTR20200002000                                | sp P62995 TRA2B_HUMAN |
| 6483 | ENIKPNETSPSFSK2000000                                  | sp Q99700 ATX2_HUMAN  |
| 6484 | SLTDPSQESHTEAISDAETSSDISFSGIATR222200200000000         | sp Q5QJE6 TDIF2_HUMAN |
| 6485 | SQDSYPGSPSLSPR20002000                                 | sp Q6VN20 RBP10_HUMAN |
| 6486 | RISTSDILSEK2000000000                                  | sp 060293 ZC3H1_HUMAN |
| 6487 | SLESLADGGSASPIKDQPMVK2E+20                             | sp Q9HB96 FANCE_HUMAN |
| 6488 | SSSVGSSSYPISPAUSR23002000000                           | sp Q15149 PLEC_HUMAN  |
| 6489 | GNSRPGTPSAEGGSTSSTLR202000000000000                    | sp P35269 T2FA_HUMAN  |
| 6490 | SEEEASSTEKPTK200000000000000                           | sp Q9UGY1 NOL12_HUMAN |
| 6491 | GGISVQVNSIKFDSE200                                     | sp Q14978 NOLC1_HUMAN |
| 6492 | KPHDCESSTVSEEDYFSSHR2020000000000                      | sp Q9H4H8 FA83D_HUMAN |
| 6493 | HELSPQKR2000000                                        | sp Q9BXP5 SRRT_HUMAN  |
| 6494 | RPPTPCSDPER200200000                                   | sp Q9BW71 HIRP3_HUMAN |
| 6495 | KRSEGFMDR200000000                                     | sp Q7Z4V5 HDGR2_HUMAN |
| 6496 | LPSVENRPK20000000                                      | sp 015417 TNC18_HUMAN |
| 6497 | DGSLNQSSGYR2000000000                                  | sp P06241 FYN_HUMAN   |
| 6498 | EPTPVLGSGAAAAGR200000000000000                         | sp P42167 LAP2B_HUMAN |
|      |                                                        | sp P42166 LAP2A_HUMAN |
| 6499 | LPSKELPDSSSPVANNIR200000000000000000                   | sp Q9BWT3 PAPOG_HUMAN |
| 6500 | CSSPVDTECSHAEGSR200000000000000                        | sp 075170 PP6R2_HUMAN |
| 6501 | ILLPSFQDSEDDDDILPNMDK200000000000000                   | sp Q6P0N0 M18BP_HUMAN |
| 6502 | VTGTEGSSSTLVDTSTSTGGSPVR20000                          | sp Q7Z6E9 RBBP6_HUMAN |
| 6503 | SLTNSHLEK2000200000                                    | sp Q9H2H9 S38A1_HUMAN |
| 6504 | SGSPSDNSGAEEMEVSLAKPK2.0200200001E+19                  | sp P31749 AKT1_HUMAN  |
| 6505 | RPAPAVSPGSKPGPPGSPRPWK200000000002000000               | sp Q96JM3 CHAP1_HUMAN |
| 6506 | ASSHSSQTQGGGSVTK200000000000000                        | sp P02545 LMNA_HUMAN  |
| 6507 | TRSPSPDDILER2020200000000                              | sp Q13523 PRP4B_HUMAN |
| 6508 | AASAPAKESPR2000                                        | sp Q13428 TCOF_HUMAN  |
| 6509 | LSPENNVLTQK20000000000                                 | sp Q16514 TAF12_HUMAN |
| 6510 | SPHSPSIATPPSQSSSCSDAPMLSTVHSAK2.020002E+28             | sp Q9NYF8 BCLF1_HUMAN |
| 6511 | LAEAPSPAPTPSPTPVEDLGPQTSTSPGRLSPDFAEELR200002000000000 | sp Q14160 SCRIB_HUMAN |
| 6512 | VETVSPSESPK202000                                      | sp Q99590 SCAFB_HUMAN |
| 6513 | GHHVTDSENDEPLNLDSESEELHR2.0200000000002E+23            | sp Q96ST2 IWS1_HUMAN  |
| 6514 | VISHDRDSPPPPPPPPPPPPPQPSLK2E+24                        | sp Q69YN4 VIR_HUMAN   |
| 6515 | RDSFDNCSLGESSK2000000000000                            | sp Q5UIP0 RIF1_HUMAN  |



|      |                                                   |                       |
|------|---------------------------------------------------|-----------------------|
| 6569 | ILDELKDDSTHESLSQESESEEDGIHVDSQK200202000000000000 | sp Q9H6T3 RPAP3_HUMAN |
| 6570 | KSLSDSESDSK202000000000                           | sp Q13185 CBX3_HUMAN  |
| 6571 | TVDLGISDLEDDC20000000                             | sp Q8NHQ9 DDX55_HUMAN |
| 6572 | EVSSRPSTPGLSVVSGISATSEIPNKIEDLR2.002E+29          | sp Q14C86 GAPD1_HUMAN |
| 6573 | ELDEEGSDPPLPGR200000000                           | sp Q9BRJ6 CG050_HUMAN |
| 6574 | SQDATFSPGSEQAEKSPGPIVSR2000000000000000           | sp Q86WB0 NIPA_HUMAN  |
| 6575 | QQSTPQAANSPPNLGAK200000000                        | sp Q9Y4C1 KDM3A_HUMAN |
| 6576 | SCFESSDPPELK2000020000000                         | sp Q9UQ35 SRRM2_HUMAN |
| 6577 | AAPQSPSVPK2000000                                 | sp 075694 NU155_HUMAN |
| 6578 | LQELESCGLGSTSDTDVDR20200020000000000              | sp Q14C86 GAPD1_HUMAN |
| 6579 | TEQELPRPQSPDLDSLDR202000200000                    | sp P54259 ATN1_HUMAN  |
| 6580 | AENGERSDLEEDNER2000000000                         | sp Q8WU90 ZC3HF_HUMAN |
| 6581 | VSSQAEDTSSSFDNLFIDR200000000000                   | sp P0CAP2 GRL1A_HUMAN |
| 6582 | TPKDSPGIPPSAGAHQLFR2.0002E+19                     | sp Q9BZD3 GCOM2_HUMAN |
| 6583 | RISLSDMPR200000                                   | sp Q15418 KS6A1_HUMAN |
| 6584 | ISNLSPEEEQGLWK20000000000                         | sp Q9ULU4 PKCB1_HUMAN |
| 6585 | VSVGDSSEFSPIQEAQQDR20000000000                    | sp Q5HYJ3 FA76B_HUMAN |
| 6586 | KESKEETSIDVAGKPNEVTK200000000000000               | sp Q8N2Y8 RUSC2_HUMAN |
| 6587 | SHESNAPGSAGGQASEKPR200000                         | sp P53985 MOT1_HUMAN  |
| 6588 | SEDEESLAGQK200000000000                           | sp Q6PJG2 EMSA1_HUMAN |
| 6589 | TQTPPVSPAPQTEER20200000000000000                  | sp Q96EZ8 MCRS1_HUMAN |
| 6590 | LLKPGEEPSEYTDDEEDTK320000000                      | sp Q14247 SRC8_HUMAN  |
| 6591 | VAASMLSPGGQMEEVAGAVK200000000000000               | sp Q15173 PGRC2_HUMAN |
| 6592 | DFATPSLHTSDQSPGK20000                             | sp Q9UMN6 KMT2B_HUMAN |
| 6593 | TTSFFLNSPEK20000                                  | sp Q63HN8 RN213_HUMAN |
| 6594 | QDFSPERPK2000000                                  | sp Q8WYP5 ELYS_HUMAN  |
| 6595 | SLVDYENANK20000000000                             | sp Q6T4R5 NHS_HUMAN   |
| 6596 | ASEDTTSGSPPK20000                                 | sp Q9UNH7 SNX6_HUMAN  |
| 6597 | YSPTSPTYSPVYTPSPK300020002000000                  | sp Q9BZZ5 API5_HUMAN  |
| 6598 | IPVEGPLSPSR20000                                  | sp P24928 RPB1_HUMAN  |
| 6599 | HSHSPASSPKPLK20020000000                          | sp P00512 BCL9_HUMAN  |
| 6600 | RLSSLRASTSK2200000000                             | sp Q9HDC5 JPH1_HUMAN  |
| 6601 | FTSQDASTPASSELNK200000000000000                   | sp P62753 RS6_HUMAN   |
| 6602 | KPSQTLQPSEDLADGK200000000000000                   | sp Q9HAW4 CLSPN_HUMAN |
| 6603 | GSISSTSEVHSPNVGLR20000000000000000                | sp Q13029 PRDM2_HUMAN |
| 6604 | AGSPSPQPSGELPR2000000000000                       | sp Q8WWQ0 PHIP_HUMAN  |
| 6605 | SAEPAEALVLACK200000000000000                      | sp Q92619 HMHA1_HUMAN |
| 6606 | ALSPVTSR2000000                                   | sp Q96CW6 S7A60_HUMAN |
| 6607 | TSSTCSNESLSVGGTSVTPR2E+19                         | sp Q96L91 EP400_HUMAN |
| 6608 | TPASTPVSGTPQASPMIER2000002010000                  | sp 060343 TBCD4_HUMAN |
| 6609 | FSPTMGR2000000                                    | sp Q9UHR4 BI2L1_HUMAN |
| 6610 | TGSSSPGGPPKPGSQLDSMLGSLQSDLNK2E+26                | sp P78344 IF4G2_HUMAN |
| 6611 | NYQQNYQNSESGEKNEGSESAPEGQAQR3.00000000000002E+24  | sp P49023 PAXI_HUMAN  |
| 6612 | KEEPSQNDISPK2000                                  | sp P67809 YBOX1_HUMAN |
| 6613 | APSASDSKADSDGAKPEPVAMAR2.02020002E+21             | sp Q9NR30 DDX21_HUMAN |
| 6614 | GSSPTPPCSPVQPSK200020000000                       | sp Q7Z4V5 HDGR2_HUMAN |
| 6615 | GSGGLFSPSTAHPD GALGQR2000000000000000             | sp Q9NUL3 STAU2_HUMAN |
| 6616 | EALGLGPPAAQLTPPPAPVGLR20000000000                 | sp Q9C0C2 TB182_HUMAN |
| 6617 | SSSLDGEHHDGYHR200000000000000                     | sp Q8IY67 RAVR1_HUMAN |
| 6618 | KTESFQNAQAGSNPK2000000000000                      | sp Q9C0J8 WDR33_HUMAN |
| 6619 | DKEPFTFSSPASGR20002000                            | sp Q92667 AKAP1_HUMAN |
| 6620 | EHYPVSSPSSPPAQPGGVSRR200000000000000              | sp Q6P1X5 TAF2_HUMAN  |
| 6621 | SMSVDETDKSPCEAGR20000000000000000                 | sp 075179 ANR17_HUMAN |
|      |                                                   | sp Q53SF7 COBL1_HUMAN |

|      |                                                |                        |
|------|------------------------------------------------|------------------------|
| 6622 | DGDSYDPYDFSDTEEMPVHTPK2.000000000001E+21       | sp P25205 MCM3_HUMAN   |
| 6623 | GILAADESTGSIK20000                             | sp P04075 ALDOA_HUMAN  |
|      |                                                | sp ALDOA_RABIT         |
| 6624 | VPHLEEVMSPVTTPTDEDVGHR200200000000000          | sp Q3KR37 GRM1B_HUMAN  |
| 6625 | SAPTSPTATNISSK20000000000                      | sp Q9H792 PEAK1_HUMAN  |
| 6626 | IALESEGRPEEQMESDNCSGGDDDWHLSSK1.020002E+19     | sp Q13501 SQSTM_HUMAN  |
| 6627 | SSDGGSEPPDR200000000000                        | sp Q9HCD6 TANC2_HUMAN  |
| 6628 | HDTVTVSSDLQFTK200000000                        | sp P30414 NKTR_HUMAN   |
| 6629 | AVTTVTQSTPVPGPSVPPPEELQVSPGPR200000            | sp P51610 HCFC1_HUMAN  |
| 6630 | ANSDDERPVASDNDDEKQNSDDEEQQLSDEEK2.00000002E+31 | sp Q8WVC0 LEO1_HUMAN   |
| 6631 | AGLESGAEPGDGSDTTTKK2000000002000000            | sp O60832 DKC1_HUMAN   |
| 6632 | TPNNVSTPAPSPDASQLASSLSSQK2E+20                 | sp Q8WWI1 LMO7_HUMAN   |
| 6633 | YSPTSPTYSPK200030000000                        | sp P24928 RPB1_HUMAN   |
| 6634 | ECLTGESESSSEDEFK202220000000                   | sp Q56P03 EAPP_HUMAN   |
| 6635 | ISSLLEEQFQGGK200000000000                      | sp P62241 RS8_HUMAN    |
| 6636 | SGSSQELDVKPSASPQER2002000000000200000          | sp Q9UQ35 SRRM2_HUMAN  |
| 6637 | KPIETGSPK2000                                  | sp Q05519 SRS11_HUMAN  |
| 6638 | NSFTPLSSNTIR2000000000000                      | sp O60825 F262_HUMAN   |
| 6639 | QGSITSPQANEQSVTPQRR200000000200000             | sp Q9UQ35 SRRM2_HUMAN  |
| 6640 | SMVSPVSPGTISVPNSCPASPR2.0002E+21               | sp P85037 FO XK1_HUMAN |
| 6641 | HSPIAPSSPQVLAQK220000000000                    | sp Q9NQS7 INCE_HUMAN   |
| 6642 | AGLSLEASGR2000                                 | sp O60784 TOM1_HUMAN   |
| 6643 | RKSLDSESDSK202000200000                        | sp Q13185 CBX3_HUMAN   |
| 6644 | TSPCQPTISEGPVPSLPIRPSR2.000202E+22             | sp O43426 SYNJ1_HUMAN  |
| 6645 | SPSPGNHTSNSSNASNATVVPQNSSAR20000000000000000   | sp Q9BTA9 WAC_HUMAN    |
| 6646 | DSAYQSI THYRVSASR20000                         | sp P50402 EMD_HUMAN    |
| 6647 | SPSLSQSASR200000000000                         | sp Q9H2P0 ADNP_HUMAN   |
| 6648 | ESDKEDGRESYDTPSQR2000000000000000000           | sp Q9Y6M7 S4A7_HUMAN   |
| 6649 | TTSPEPQESPTLPSTEGQVVK2.2E+21                   | sp P53814 SMTN_HUMAN   |
| 6650 | TLDVSTDEEDK22000000                            | sp P16383 GCFC2_HUMAN  |
| 6651 | SQDATFSPGSEQAEK2000000000                      | sp Q86WB0 NIPA_HUMAN   |
|      |                                                | sp P49792 RBP2_HUMAN   |
|      |                                                | sp Q7Z3J3 RGPD4_HUMAN  |
| 6652 | EDALDDSVSSSVHASPLASSPVR20002000200000          | sp O14715 RGPD8_HUMAN  |
|      |                                                | sp Q99666 RGPD5_HUMAN  |
|      |                                                | sp A6NKT7 RGPD3_HUMAN  |
| 6653 | VIEPPAASCPSR2000                               | sp Q3MIN7 RGL3_HUMAN   |
| 6654 | ATSSSSGSLSATGR2000000000000                    | sp Q03252 LMNB2_HUMAN  |
| 6655 | SQSAAVTPSSTTSSTR20000000                       | sp Q16186 ADRM1_HUMAN  |
| 6656 | TAGSSVTSLDGTR22000000                          | sp Q92597 NDRG1_HUMAN  |
| 6657 | GSDYSWSYQTPSSPSSSSSR300000200000000            | sp Q765P7 MTSSL_HUMAN  |
| 6658 | LSSSDRYSDASDDSFSEPR30002002000000              | sp Q9NRF8 PYRG2_HUMAN  |
| 6659 | EEPSENIPQELLSNLGHPESPPR20000                   | sp Q13309 SKP2_HUMAN   |
| 6660 | GASSPYGAPGTPR20000000000                       | sp Q5UIP0 RIF1_HUMAN   |
| 6661 | KAPSASDSDKADSDGAKPEPVAMAR2.0202020002E+23      | sp Q7Z4V5 HDGR2_HUMAN  |
| 6662 | SPTEDFR20000000                                | sp Q8IXT5 RB12B_HUMAN  |
| 6663 | GVHIHQAGGSPASSTSSSSLTNDVAK200000000            | sp Q8N122 RPTOR_HUMAN  |
| 6664 | LSSSSPGATVSPSSSDAEYDKLPDADLAR2.20002E+26       | sp Q8NI08 NCOA7_HUMAN  |
| 6665 | KSSFNVS DVARPEAAGSPPEEGGCTEGTPAK2E+29          | sp Q92619 HMHA1_HUMAN  |
| 6666 | RRSPSPAPPPR20000000                            | sp Q8IYB3 SRRM1_HUMAN  |
| 6667 | YPLCSADAAVSTTPPGSPPPPPLPEPPVLK2.0002E+19       | sp Q9BTC0 DIDO1_HUMAN  |
| 6668 | KESESEDSSDEPLIK2002200000000                   | sp P35659 DEK_HUMAN    |
| 6669 | MKTPVQYSQQNSPK20000000020000                   | sp P46013 KI67_HUMAN   |
| 6670 | ERDHSPTPSVFNSDEER20000000000                   | sp Q6UN15 FIP1_HUMAN   |

|      |                                              |                       |
|------|----------------------------------------------|-----------------------|
| 6671 | LTPVSLSNSPIK200020000                        | sp P46100 ATRX_HUMAN  |
| 6672 | GSSGPRPVEGTPASR200000000000000               | sp Q13112 CAF1B_HUMAN |
| 6673 | SPGSGSQSSGWHEVEPGMPSPTTLK2E+25               | sp Q12857 NFIA_HUMAN  |
| 6674 | KPPAPSPVQSQSPSTNWSPAVPVK2002000000000        | sp Q8IYB3 SRRM1_HUMAN |
| 6675 | GPEAAGLSSPLSFPSQR2000000000                  | sp Q8TEK3 DOT1L_HUMAN |
| 6676 | SLSYSPVER2020200000                          | sp Q9UQ35 SRRM2_HUMAN |
| 6677 | SGSSQELDVKPSASPQER2000000000000000000        | sp Q9UQ35 SRRM2_HUMAN |
| 6678 | AWLDEDSNLSPSPLR2002000000                    | sp Q9C086 IN80B_HUMAN |
| 6679 | IQSSLSVNSDISKK2002002000                     | sp Q9P1T7 MDFIC_HUMAN |
| 6680 | APQTSSSPPVVR20000000                         | sp Q8IYB3 SRRM1_HUMAN |
| 6681 | STSPAGQHHSPISR2200000000000000               | sp Q5T200 ZC3HD_HUMAN |
| 6682 | YFQSPSR20000                                 | sp Q16629 SRSF7_HUMAN |
| 6683 | SSTPLPTISSAENTR200000000000000200            | sp P42166 LAP2A_HUMAN |
| 6684 | TVSASSTGDLPK2020002000000                    | sp P42167 LAP2B_HUMAN |
| 6685 | HGSSDISSPR22000                              | sp P78362 SRPK2_HUMAN |
| 6686 | ASLQSGQEGAGDSPGSQFSK2000000000               | sp Q9BRD0 BUD13_HUMAN |
| 6687 | GGSGSHNWGTVKDELTEPK2000                      | sp Q12778 FOXO1_HUMAN |
| 6688 | KRPACDEPEGESGSSSDEGCTVVRPEK222000000000000   | sp Q8NC51 PAIRB_HUMAN |
| 6689 | RPGGSSPLNAVPCGPPGSEPPR2000000000000000000    | sp O15541 R113A_HUMAN |
| 6690 | KPSPSEPEPWKPFPAVSPEPR2000000000000000000     | sp P48634 PRC2A_HUMAN |
| 6691 | TSPSSLPGR2000000000                          | sp Q96JM3 CHAP1_HUMAN |
| 6692 | HSLSGSSPGMK2200000                           | sp Q5SNT2 TM201_HUMAN |
| 6693 | SKPIPIMPASPQK10020000                        | sp Q9UQ35 SRRM2_HUMAN |
| 6694 | VPVPGPGSGNGPER2000000000                     | sp O00429 DNM1L_HUMAN |
| 6695 | RNSNSPPSPSSMNQR2020000000000000              | sp Q6ZRV2 FA83H_HUMAN |
| 6696 | FGQAATMEGIGAIGGTPAFNR20000000                | sp Q7Z5L9 I2BP2_HUMAN |
| 6697 | TAPSSPLTSPSDTR220020000000                   | sp Q15233 NONO_HUMAN  |
| 6698 | SQSSDLLER2020000000                          | sp Q8IWB9 TEX2_HUMAN  |
| 6699 | GNVVPSPLPTR20000000                          | sp Q8IVT2 MISP_HUMAN  |
| 6700 | GPTTGEALDLSVHSPPKSPEGK20000000200000         | sp Q9Y2V2 CHSP1_HUMAN |
| 6701 | SWDSSSPVDRPEPEAASPTR20000000000200000        | sp O95684 FR10P_HUMAN |
| 6702 | FDHESPGTDEDK2002000000                       | sp Q86WB0 NIPA_HUMAN  |
| 6703 | QEESESPVERPLKENPPNK2020000000000000000       | sp Q13427 PPIG_HUMAN  |
| 6704 | VVVSPTKK200000                               | sp Q96SB4 SRPK1_HUMAN |
| 6705 | GSSPTPPCSPVQPSK220000020000000               | sp P19338 NUCL_HUMAN  |
| 6706 | SPFNPSPPQDSR20000000000                      | sp Q9NUL3 STAU2_HUMAN |
| 6707 | SHSTEPNLSSFLNDPNMK2000000000000000000        | sp P08651 NFIC_HUMAN  |
| 6708 | GPPSPAPVMHSPSRK20000000200000                | sp Q9UPQ0 LIMC1_HUMAN |
| 6709 | TPTSGPVITK2000000000                         | sp Q13573 SNW1_HUMAN  |
| 6710 | RRSFSISPSR2020000000                         | sp Q6MZP7 LIN54_HUMAN |
| 6711 | GSDALSETSSVSHIEDLEK2000002000000000          | sp P18583 SON_HUMAN   |
| 6712 | LSPERSSDESNEPHLPHGVSQR2.00022E+24            | sp Q6P996 PDXD1_HUMAN |
| 6713 | THDHQLESSLSPVEVFAK20200000000                | sp Q9BQ52 RNZ2_HUMAN  |
| 6714 | TGQAGSLSGSPKPFSPQLSAPITTK2000000000000000000 | sp Q9H410 DSN1_HUMAN  |
| 6715 | YFGSIDSSEAEAGAAR2002200000000000             | sp Q9ULU4 PKCB1_HUMAN |
| 6716 | STSTPNVHMVSTTLPVDSR2000000000000000000       | sp O15534 PER1_HUMAN  |
| 6717 | ASPGTPLSPGLR2000002000000                    | sp P04049 RAF1_HUMAN  |
| 6718 | QKSDAEEDGGTVSQEEEDRKPK2.00000002E+20         | sp Q96BD0 SO4A1_HUMAN |
| 6719 | SQSAAVTPSSTTSSTR200000000000                 | sp P27824 CALX_HUMAN  |
| 6720 | EYDSGDTDEIIAMK200000000000                   | sp Q16186 ADRM1_HUMAN |
| 6721 | VPSPTPAPK200000                              | sp Q76FK4 NOL8_HUMAN  |
| 6722 | SEIPSPQSQLEDAEANLVGR2000000000000000         | sp Q9UQ35 SRRM2_HUMAN |
| 6723 | VTGGVSESPSGFSK2000000000000000               | sp Q9ULJ8 NEB1_HUMAN  |
|      |                                              | sp O14757 CHK1_HUMAN  |

|      |                                                      |                       |
|------|------------------------------------------------------|-----------------------|
| 6724 | RSPRPDHPGTPPHK20000000200000                         | sp P30291 WEE1_HUMAN  |
| 6725 | SRSPTPSSAGLGSNSAPP PDSR220000200000000000            | sp Q81WX8 CHERP_HUMAN |
| 6726 | ASSLESSEPPK20000                                     | sp Q9UHB6 LIMA1_HUMAN |
| 6727 | EYIPGQPPLSQSSDSSPTR20000000000                       | sp P07814 SYEP_HUMAN  |
| 6728 | SYSPDGKESPSDK200000200000                            | sp P43243 MATR3_HUMAN |
| 6729 | DGDKSPMSSLQISNEK2010000000000                        | sp Q9UER7 DAXX_HUMAN  |
| 6730 | SQDATFSPGSEQAEKSPGPIVSR200200000200000000            | sp Q86WB0 NIPA_HUMAN  |
| 6731 | GHPAQRPEPSPPEPEPQAPEGSQAGAEGPSSPEASR2E+27            | sp Q6ZW31 SYDE1_HUMAN |
| 6732 | HGGSPQPLATTPLSQEPVNPPEASPTR2. 0000022E+25            | sp Q9UQ35 SRRM2_HUMAN |
| 6733 | RPPSPDIVLSDNEQPSSPR200000020000020000                | sp Q86YP4 P66A_HUMAN  |
| 6734 | SSATSGDIWPGLSAYDNSPR2. 0000000000003E+19             | sp Q9NYF8 BCLF1_HUMAN |
| 6735 | SSSQPSSCCSDPSKPGGVEGATQSLAEQMR2. 002E+29             | sp Q13501 SQSTM_HUMAN |
| 6736 | EVSSRPSTPGLSVVSGISATSEIPNK2002000000000000           | sp Q14C86 GAPD1_HUMAN |
| 6737 | ALSSGGSITSPPLSPALPK200002000000000000                | sp Q6Y7W6 PERQ2_HUMAN |
| 6738 | GRNSATSADEQPHIGNYR20000000000000                     | sp Q7KZI7 MARK2_HUMAN |
| 6739 | TVAISDAAQLPHDYCTTPGGTLFSTTPGGTR3000000000002000000   | sp Q13542 4EBP2_HUMAN |
| 6740 | LQSFDSPER20000                                       | sp P78332 RBM6_HUMAN  |
| 6741 | TRLSTASEETVQNR220200000000                           | sp O43379 WDR62_HUMAN |
| 6742 | GWSQEGPVKSPAECR20000002000000                        | sp Q9C0C2 TB182_HUMAN |
| 6743 | IHNVGSPLK20000                                       | sp P52701 MSH6_HUMAN  |
| 6744 | EIPEDVDMEEKESEDSDEENDFTEK20020000000000              | sp Q8IWA0 WDR75_HUMAN |
| 6745 | QESCPHHPQVLAQQGSGSSPK200000000000000000              | sp Q8N1G0 ZN687_HUMAN |
| 6746 | QEEDSRSSSEESDSDREALAAMNAAQVKPLGK2. 022200202E+28     | sp Q13428 TCOF_HUMAN  |
| 6747 | RYSPP QR2000000                                      | sp Q8IYB3 SRRM1_HUMAN |
| 6748 | GSPSSHLLGADHGLR2000000000000000                      | sp Q6NWX9 PR40B_HUMAN |
| 6749 | YNQSI SLR2000                                        | sp Q9UBH6 XPR1_HUMAN  |
| 6750 | GRPSKTPSPSQPK202000000                               | sp Q9NTI5 PDS5B_HUMAN |
| 6751 | SWSTATSPLGGERPFR200000200000000000                   | sp Q9UPQ0 LIMC1_HUMAN |
| 6752 | VAHEPVAPPEDKESESEAK2000000                           | sp O95674 CDS2_HUMAN  |
| 6753 | TEDGGEFEEGASENNAKESPEKEAEEGCPEK2. 00000002E+21       | sp O43719 HTSF1_HUMAN |
| 6754 | LVEQANS PK2000                                       | sp O95391 SLU7_HUMAN  |
| 6755 | RSETPPHWR202000000                                   | sp Q13427 PPIG_HUMAN  |
| 6756 | EISSPARPCSFEEAMK20000000000000                       | sp O94916 NFAT5_HUMAN |
| 6757 | TSPTVATQTGASATSTR2000000000000000                    | sp Q6P1L5 F117B_HUMAN |
| 6758 | QAPGVGAVGGGSPEREV GAGYNSEDEYEAAAAR2E+23              | sp Q96G74 OTUD5_HUMAN |
| 6759 | SLNFQEDDDTSR2200                                     | sp Q9H814 PHAX_HUMAN  |
| 6760 | SPTTPIDPEK20000000000                                | sp Q08AD1 CAMP2_HUMAN |
| 6761 | YSHSYLSDSDTEAK200200000000                           | sp Q92614 MY18A_HUMAN |
| 6762 | ASSHSSQTQGGGSVTK2000000000000200                     | sp P02545 LMNA_HUMAN  |
| 6763 | GPSHPLDLGTSSPNTSQIHWPYR200000000000000               | sp O60504 VINEX_HUMAN |
| 6764 | LDDAHSLSGSGAGEGYEPI SDDELDELILAGDAEK2000000000000000 | sp Q5T200 ZC3HD_HUMAN |
| 6765 | EAYNDSSDEESSHHGPGVQCAHQ3. 0002E+22                   | sp O60884 DNJA2_HUMAN |
| 6766 | SPSSPELNK20020000000                                 | sp Q9UQ35 SRRM2_HUMAN |
| 6767 | NASASFQELEDKK200000000000                            | sp Q99543 DNJC2_HUMAN |
| 6768 | SGSIVELIAGGGSSCSPVLSR2000000000                      | sp P42858 HD_HUMAN    |
| 6769 | TEDGGEFEEGASENNAKESPEKEAEEGCPEK2200000000000000      | sp O43719 HTSF1_HUMAN |
| 6770 | SPAKSPNPSTPR2000200000000                            | sp O76021 RL1D1_HUMAN |
| 6771 | MAEESSSSSSSSPTAATSQQQLK20000000000000                | sp Q13620 CUL4B_HUMAN |
| 6772 | SEALSSVLDQEAMEIK22000000000000                       | sp Q12888 TP53B_HUMAN |
| 6773 | KLSASYEK2000000                                      | sp Q9Y297 FBW1A_HUMAN |
| 6774 | SVSSPTSSNTPTPTK2000000                               | sp Q5M775 CYTSB_HUMAN |
| 6775 | RHSSVSDSQPCEPPSVGTEYSQGASPPQHQHLK2. 2E+31            | sp P39880 CUX1_HUMAN  |
| 6776 | RESPAPKPR2020000000                                  | sp Q8IYB3 SRRM1_HUMAN |
| 6777 | LASPMKPVGTPPSSK200000002000000                       | sp Q15648 MED1_HUMAN  |

|      |                                                     |                       |
|------|-----------------------------------------------------|-----------------------|
| 6778 | YPLCSADAAVSTTPPGSPPPPPPLPEPPVLK2.00002E+20          | sp Q9BTC0 DID01_HUMAN |
| 6779 | LDTGPQSLSGK2000                                     | sp P35269 T2FA_HUMAN  |
| 6780 | TPSDDEEDNLFAPPK2000000000000000                     | sp Q641Q2 FA21A_HUMAN |
| 6781 | EKGPTTGEGALDLSDVHSPPKSPEGK20000000200000            | sp Q9Y4E1 FA21C_HUMAN |
| 6782 | TPASGLQTPSTPAPGSATR20200                            | sp 095684 FR10P_HUMAN |
| 6783 | TGVTSTSDSEEEGDDQEGEK220000000000000000              | sp Q96DF8 DGC14_HUMAN |
| 6784 | RPLPVESPDTR2000000                                  | sp 075475 PSIP1_HUMAN |
| 6785 | SLSLDPGQSLEPHPEGPQR200000000000000000               | sp P57682 KLF3_HUMAN  |
| 6786 | GNSRPGTPSAEGGSTSSTLR20000000000000                  | sp P98174 FGD1_HUMAN  |
| 6787 | KFELLTPPLSPSR200020000                              | sp P35269 T2FA_HUMAN  |
| 6788 | RASSPSLIER220000000                                 | sp P01106 MYC_HUMAN   |
| 6789 | EDSDEEEDDDSEDEEDEDDEDEDEDEIEPAAMK2.00000002E+32     | sp P04198 MYCN_HUMAN  |
| 6790 | GCSDPDPDTSYVLTPTHTEEK200000000020000000             | sp A1L170 CA226_HUMAN |
| 6791 | RTDALTSSPGR2000000                                  | sp P19338 NUCL_HUMAN  |
| 6792 | KASVDPSTESSAPQEGSEQPASPASPLSSR200002002000000       | sp Q02078 MEF2A_HUMAN |
| 6793 | KPSPSESPKPFPAVSPEPR2E+20                            | sp P49736 MCM2_HUMAN  |
| 6794 | HRHSPTGPPGFPR20000000000                            | sp Q66K14 TBC9B_HUMAN |
| 6795 | MLPHAPGVQMIPAIPDAIPEESGDEDEDDPDKR1.00000000002E+24  | sp Q96JM3 CHAP1_HUMAN |
| 6796 | TEPAAEAEASGPSESPSPAEEELPGSHAEPVPAQGEAPGEQAR2.02E+31 | sp P98175 RBM10_HUMAN |
| 6797 | AASDSNPAGPLR20000000000                             | sp Q13547 HDAC1_HUMAN |
| 6798 | NSNSPPSPSSMNR20000200000000                         | sp P55884 EIF3B_HUMAN |
| 6799 | KSSFNVDVARPEAAGSPPEEGGCTEGTPAK2.0000000000002E+29   | sp Q9BUU2 MET22_HUMAN |
| 6800 | SRSPLLNDR2020000000                                 | sp Q7Z5L9 I2BP2_HUMAN |
| 6801 | EPESPASAPIPLFGADTIGQR2000000000000000               | sp Q92619 HMHA1_HUMAN |
| 6802 | GDTPGHATPGHGATSSAR200002000000000000                | sp Q13523 PRP4B_HUMAN |
| 6803 | SRSPTPPSSAGLGSNSAPPIDSR220000000000000000           | sp Q96AY4 TTC28_HUMAN |
| 6804 | DHFYSDDDAIEADSEGDAEPCDK3.0000000002E+20             | sp 075533 SF3B1_HUMAN |
| 6805 | TDSREDEISPPPNPVVK20000000000                        | sp Q8IWX8 CHERP_HUMAN |
| 6806 | SLSRPSLIEQEK20000000000000                          | sp Q9Y3B9 RRP15_HUMAN |
| 6807 | SYSPDGKESPSDKK200000002000000                       | sp P10644 KAP0_HUMAN  |
| 6808 | RSSQPSPTAVPASDSPPTK2000000000000000                 | sp Q12802 AKP13_HUMAN |
| 6809 | TFSEPGDHPGMLTSGK2000000000000000                    | sp P43243 MATR3_HUMAN |
| 6810 | TRSPSPDDILER20200000000                             | sp Q3KQU3 MA7D1_HUMAN |
| 6811 | IESDVQEPTPEDDLDIMLGNK2.000002E+20                   | sp Q9HA47 UCK1_HUMAN  |
| 6812 | SPGLLDTPPIR200000000000                             | sp Q13523 PRP4B_HUMAN |
| 6813 | STPLASPSPPGR200000000                               | sp P20042 IF2B_HUMAN  |
| 6814 | SPNSHDSEPWLLR2000000000000000                       | sp Q8IY92 SLX4_HUMAN  |
| 6815 | TQPSSGVDSAVGTLPATSPQSTSVQAK20000000000              | sp Q8WYP5 ELYS_HUMAN  |
| 6816 | AESSGGGTVPSSAGILEQGSPGDGSPPKPK2000000               | sp Q5T5Y3 CAMP1_HUMAN |
| 6817 | NQSHSSPSVSPSR2202020000                             | sp Q13428 TCOF_HUMAN  |
| 6818 | YSPSQNSPIHHIPSR202000000000000                      | sp Q68EM7 RHG17_HUMAN |
| 6819 | DDSHAEDSEDEKEDHKNVR200020000000000000               | sp Q7Z6E9 RBBP6_HUMAN |
| 6820 | RRSSTVAPAQPDGAESEWTDVETR2.2E+21                     | sp Q9NYF8 BCLF1_HUMAN |
| 6821 | CQTAEADSESDHEVPEPESEMK2.0000002E+20                 | sp Q9H1E3 NUCKS_HUMAN |
| 6822 | AENAEGQTPAIGPDGEPLDETSQMSDLPVK2002000000            | sp Q02241 KIF23_HUMAN |
| 6823 | SLNSVVTSEPDKHSLLVGDFR200020000000000000             | sp Q9BPX3 CND3_HUMAN  |
| 6824 | RHSHSHSPMSTR20200010000                             | sp P51532 SMCA4_HUMAN |
| 6825 | SHMSGSPGPGSNTAPSTPVIGGSDKPGMEEK2.02E+21             | sp Q04656 ATP7A_HUMAN |
| 6826 | SPQPDPVKTPTSSK200000002000000                       | sp P62995 TRA2B_HUMAN |
| 6827 | SKPNLPSESER20200                                    | sp A0FGR8 ESYT2_HUMAN |
| 6828 | IPSIVSSPLNSPLDR20002000200000                       | sp P46013 KI67_HUMAN  |
|      |                                                     | sp Q08170 SRSF4_HUMAN |
|      |                                                     | sp P49790 NU153_HUMAN |

|      |                                                     |                       |
|------|-----------------------------------------------------|-----------------------|
| 6829 | EEEEGISQESSEEEQ2002000000                           | sp P17096 HMGA1_HUMAN |
| 6830 | ASSLNENV DHSALLK20000000000000                      | sp Q96SB3 NEB2_HUMAN  |
| 6831 | LSPERSSDESSENEPHLPHGVSQR2. 202E+20                  | sp Q9BQ52 RNZ2_HUMAN  |
| 6832 | FSPFLQTAEDNTQDEVAGAPADHHGSPDEEQSGPPEDK2000002000000 | sp Q92766 RREB1_HUMAN |
| 6833 | VNSASSSNPPAEVDPDTILK200000000000000000              | sp Q9BY77 PDIP3_HUMAN |
| 6834 | LGPQDSDPTEANLESADPELCIR200000000000000000           | sp Q27J81 INF2_HUMAN  |
| 6835 | AGSKIPTPK20000000                                   | sp O60308 CE104_HUMAN |
| 6836 | GRDSPYQSR2000000                                    | sp Q13242 SRSF9_HUMAN |
| 6837 | VAAQSPSPASAEALLPALPLR2000002000000000000            | sp Q9Y4F5 C170B_HUMAN |
| 6838 | TSGAGSPQTPPER200200000                              | sp Q96MH2 HEXI2_HUMAN |
| 6839 | AGGLQSDTEDECWSDTEAVPR20200000000000000              | sp Q9H6H4 REEP4_HUMAN |
| 6840 | ISDSESEDPPR20002000000                              | sp Q96ST2 IWS1_HUMAN  |
| 6841 | SHLKSESSDESNTNKK2022002000000                       | sp Q9H7Z3 NRDE2_HUMAN |
| 6842 | AASADSTTEGTPADGFTVLSTK22000000000000000             | sp O75367 H2AY_HUMAN  |
| 6843 | SKSPVLHPPK20200000000                               | sp Q9NX31 OSER1_HUMAN |
| 6844 | LEGVDGGQSPR2000                                     | sp O00418 EF2K_HUMAN  |
| 6845 | LSLEGDHSTPPSAYGSVK20000000000                       | sp P07355 ANXA2_HUMAN |
| 6846 | TGSGSPFAGNSPAR2000000000000                         | sp A6NMY6 AXA2L_HUMAN |
| 6847 | LPLLPESPGPLR2000000                                 | sp Q9UPT8 ZC3H4_HUMAN |
| 6848 | LKEDIENEDEQNSPPKK200000                             | sp Q14160 SCRIB_HUMAN |
| 6849 | SPSVSSPEPAEK2020020000000                           | sp Q9NTI5 PDS5B_HUMAN |
| 6850 | ANTPDSDI TEKTEDSSVETPDNER2. 002002002002E+23        | sp Q9UQ35 SRRM2_HUMAN |
| 6851 | YESQLSTNEEKVDTDDRTEGYLR20000000000000000            | sp Q9H4L7 SMRCD_HUMAN |
| 6852 | TCFSPNR20000                                        | sp Q13433 S39A6_HUMAN |
| 6853 | RASPPDPSPSAASASER2000000000000                      | sp O00303 EIF3F_HUMAN |
| 6854 | GAAAADLLSSSPESQHGGTQSPGGQPLLQPTK2E+20               | sp Q9Y2F5 ICE1_HUMAN  |
| 6855 | EKTIASDSEEEAGK2020000000                            | sp Q9H3S7 PTN23_HUMAN |
| 6856 | LATPPAAQESSR20000000000                             | sp Q96ST2 IWS1_HUMAN  |
| 6857 | DDISEIQSLASDHSGR2000000                             | sp Q9Y4B4 ARIP4_HUMAN |
| 6858 | DKDSGSSSPLPK2000200000                              | sp Q07157 ZO1_HUMAN   |
| 6859 | GPNYTSGYGTSNELSNPSETESER20020000000                 | sp Q86VQ1 GLC11_HUMAN |
| 6860 | EGSEFSFDGEVAEK20000200000000                        | sp P51114 FXR1_HUMAN  |
| 6861 | STQIENQHQAQDTS DLMSPSK20000                         | sp Q9BVS4 RIOK2_HUMAN |
| 6862 | VGVEASEETPQTSSSSARPGTPSDHQSQEASQFER2000000000000000 | sp Q9NVR2 INT10_HUMAN |
| 6863 | TQLASWSDPTEETGPVAGILD TETLEK2E+23                   | sp Q6Y7W6 PERQ2_HUMAN |
| 6864 | EQGTESRSSTPLPTISSSAENTR2022000000000000000          | sp Q15149 PLEC_HUMAN  |
| 6865 | KNSFGYR200000                                       | sp P42166 LAP2A_HUMAN |
| 6866 | ESEDSETQFPDTHLEAYGPCLSPPR20000                      | sp P42167 LAP2B_HUMAN |
| 6867 | DTHEDHDTSTENTDES NHDPQFEP IVSLPEQEIK2E+19           | sp Q92615 LAR4B_HUMAN |
| 6868 | VSQSALNPHQSPDFK200000                               | sp Q14676 MDC1_HUMAN  |
| 6869 | STIGVMVTASHNPEEDNGVK1020000000000000                | sp P43487 RANG_HUMAN  |
| 6870 | RPEGPGAQAPSSPR20000                                 | sp Q9NYL2 MLTK_HUMAN  |
| 6871 | SLSIEIGHEVK2000000000                               | sp O95394 AGM1_HUMAN  |
| 6872 | VPLSNENSQVPQSPEDWR2000000                           | sp P40222 TXLNA_HUMAN |
| 6873 | DFTPVCTTELGR20000000000                             | sp O15155 BET1_HUMAN  |
| 6874 | ALSSGGSITSPPLSPALPK200002000000                     | sp Q8IZT6 ASPM_HUMAN  |
| 6875 | GSPHYFSPFRPY200002000000                            | sp P30041 PRDX6_HUMAN |
| 6876 | SFDYNYR20000000                                     | sp Q6Y7W6 PERQ2_HUMAN |
| 6877 | TLNMTTSPEEK200000                                   | sp Q13242 SRSF9_HUMAN |
| 6878 | SFSISPVR202000000                                   | sp O75494 SRS10_HUMAN |
| 6879 | SPQKPIVR200000000                                   | sp P49915 GUAA_HUMAN  |
| 6880 | LVSFHDDSDEDLLHI200000000                            | sp P18583 SON_HUMAN   |
|      |                                                     | sp P15056 BRAF_HUMAN  |
|      |                                                     | sp P11717 MPRI_HUMAN  |



|      |                                                |    |        |             |
|------|------------------------------------------------|----|--------|-------------|
| 6881 | ERHPSWR2000                                    | sp | P23588 | IF4B_HUMAN  |
| 6882 | KDDSHAEDSEDEKEDHK2000000000                    | sp | Q9H1E3 | NUCKS_HUMAN |
| 6883 | EVQAEQPSSSSPR2000                              | sp | Q9Y388 | RBMX2_HUMAN |
| 6884 | KTESPIKLSPATPSR200000020000000                 | sp | Q9Y6X9 | MORC2_HUMAN |
| 6885 | STGVSFWTQSDENEQEQQSDTEEGSNKK20000000000        | sp | 014974 | MYPT1_HUMAN |
| 6886 | RTSPSSLPR200000000                             | sp | Q5SNT2 | TM201_HUMAN |
| 6887 | YEDDGISDDEIEGK200000000                        | sp | Q9Y2K7 | KDM2A_HUMAN |
| 6888 | YSPTSPTYSPTSPVYTPTSPK220000000000              | sp | P24928 | RPB1_HUMAN  |
| 6889 | KESAPPSLR20000000                              | sp | Q8WUI4 | HDAC7_HUMAN |
| 6890 | DDPGQETDSEDEDIIGPMPAK20220000000010000         | sp | Q8IXQ4 | GPAM1_HUMAN |
| 6891 | GSETGSETHESDLAPSDK2020000000000000             | sp | P48634 | PRC2A_HUMAN |
| 6892 | HQDGLPYIDDSPSSPHLSSK200020000000               | sp | P11274 | BCR_HUMAN   |
| 6893 | TGSEPALSPAVVR2000000                           | sp | 075815 | BCAR3_HUMAN |
| 6894 | SMGTGDTPGLEVPSSPLR100000000000020000           | sp | Q86WB0 | NIPA_HUMAN  |
| 6895 | GATPPAPPR20000000                              | sp | Q6SPF0 | SAMD1_HUMAN |
| 6896 | GSPTGGAQLLK20000000000                         | sp | Q14684 | RRP1B_HUMAN |
| 6897 | AGSSAAGASGWTSAAGSLNSVPTNSAQQGHNSPDSPTSAAK2E+38 | sp | Q86XP3 | DDX42_HUMAN |
| 6898 | LSSVMCDSDSDSDILVR200002002002000000            | sp | Q8N4S0 | CCD82_HUMAN |
| 6899 | SPSPSPAAVNHSSSDISPVSNESTSSSPGK220000           | sp | 075381 | PEX14_HUMAN |
| 6900 | RGSLSQEMAK200000000                            | sp | Q8NFC6 | BD1L1_HUMAN |
| 6901 | RNSNSPPSPSSMNQR20200002000000                  | sp | Q7Z5L9 | I2BP2_HUMAN |
| 6902 | GESAPTLSTSPSPSSPSTSPSPTLGR20000                | sp | Q9H330 | TM245_HUMAN |
| 6903 | VAFDPEQKPLHGVLKPTSSPASSPLVAK202000002000000    | sp | Q14684 | RRP1B_HUMAN |
| 6904 | SNVSSPATPTASSSSSTPTR2000000000000              | sp | Q12888 | TP53B_HUMAN |
| 6905 | FGSADNIPNLK2000000000                          | sp | 094876 | TMCC1_HUMAN |
|      |                                                | sp | POCL80 | GG12F_HUMAN |
|      |                                                | sp | POCL81 | GG12G_HUMAN |
|      |                                                | sp | POCL82 | GG12I_HUMAN |
| 6906 | YVQPPEMIGPMRPEQFSDEVEPATPEEGEPATQR200000000000 | sp | Q13065 | GAGE1_HUMAN |
|      |                                                | sp | Q13068 | GAGE4_HUMAN |
|      |                                                | sp | 076087 | GAGE7_HUMAN |
| 6907 | TEEDSKSIKSDVPVYLK200200000000                  | sp | Q5SW79 | CE170_HUMAN |
| 6908 | SPAAPSPALR200002000000                         | sp | Q9P270 | SLAI2_HUMAN |
| 6909 | VEMYSGDDDDDFNK10202000000000                   | sp | 060841 | IF2P_HUMAN  |
| 6910 | SLSGSPLK20000                                  | sp | Q9UIG0 | BAZ1B_HUMAN |
| 6911 | LSQSSQDSSPVR200000020000                       | sp | 095251 | KAT7_HUMAN  |
| 6912 | ERSPPLSPEEK2000200000                          | sp | Q8N157 | AHI1_HUMAN  |
| 6913 | NATDLQNSSMSEEELTK20000000000                   | sp | P40855 | PEX19_HUMAN |
| 6914 | TSSTCSNESLSVGGTSVTPR2. 2E+20                   | sp | 060343 | TBCD4_HUMAN |
| 6915 | SPSPGLFR202000000                              | sp | Q9HAW4 | CLSPN_HUMAN |
| 6916 | INSDDSNLYLTASK2002000000000                    | sp | Q9BZG1 | RAB34_HUMAN |
| 6917 | SLPSTSSTSSTKR20000                             | sp | Q12857 | NFIA_HUMAN  |
| 6918 | EDKPPLAPSGGTEGPEQPPPCPSQTGSPPVGLIK200000000    | sp | Q8WWM7 | ATX2L_HUMAN |
| 6919 | RGSDASDFDISEIQSVCSDEVETVPQTHRPTPR2. 002E+30    | sp | Q03001 | DYST_HUMAN  |
| 6920 | TTQSMQDFPVVDSEEEAEEEFQK1. 00000002E+19         | sp | Q9UBB9 | TFP11_HUMAN |
| 6921 | SRSPLAIR202000000                              | sp | Q9UQ35 | SRRM2_HUMAN |
| 6922 | QKSDAEDGGTVSQEEEDRKP20000000000                | sp | P27824 | CALX_HUMAN  |
| 6923 | GTYPSSPTR20000                                 | sp | Q9Y4P8 | WIPI2_HUMAN |
| 6924 | TSSAFVGKTPEASPEPK20000000000200000             | sp | Q99460 | PSMD1_HUMAN |
| 6925 | DEILPTTPISEQK20000000                          | sp | P23396 | RS3_HUMAN   |
| 6926 | KELSEESEDEELQLEEFMLK2002000000000000000        | sp | Q99543 | DNJC2_HUMAN |
|      |                                                | sp | P42167 | LAP2B_HUMAN |
| 6927 | EQGTESRSSTPLPTISSAENTR2. 02E+20                | sp | P42166 | LAP2A_HUMAN |
| 6928 | GLPPSMER20000                                  | sp | P38159 | RBMX_HUMAN  |

|      |                                                 |                       |
|------|-------------------------------------------------|-----------------------|
| 6929 | ERPLQQVSPVASVPWR2000000000                      | sp Q9BY89 K1671_HUMAN |
| 6930 | SPRPDHPGTPPHK20000000000000                     | sp P30291 WEE1_HUMAN  |
| 6931 | LSSSPSGSGGGGASSSSHCSGESQCR2E+25                 | sp Q9Y4X0 AMMR1_HUMAN |
| 6932 | QHEAPSNRPLNELLTPQGSPR2000                       | sp P10398 ARAF_HUMAN  |
| 6933 | SASVNKEPVSPLGIMR20000000000100                  | sp Q8WWI1 LMO7_HUMAN  |
| 6934 | KFSAGGSDPPLK20000000000000                      | sp O75152 ZC11A_HUMAN |
| 6935 | SAPTSPTATNISSK2002000000000000                  | sp Q9H792 PEAK1_HUMAN |
| 6936 | VPCNVEGISPELEK20000000                          | sp Q86VQ1 GLC11_HUMAN |
| 6937 | LQPSSSPENSLDPFPPR2000000000000000               | sp Q8WWM7 ATX2L_HUMAN |
| 6938 | SSISGSLPSSGSLQAVSSR20000000000000000000         | sp Q9BXF6 RFIP5_HUMAN |
| 6939 | KPSKYPLCSADAAVSTTPPGSPPPPPLPEPPVLK2.000002E+21  | sp Q9BTC0 DIDO1_HUMAN |
| 6940 | AQCETLSPDGLPEEQPQTTK20000000000000000000        | sp Q7Z6Z7 HUWE1_HUMAN |
| 6941 | VTAEADSSSPTGILATSESK2000000000000000            | sp A0MZ66 SHOT1_HUMAN |
| 6942 | EPLENSASESSDTELPEK2020200000000000              | sp P78337 PITX1_HUMAN |
| 6943 | STPLASPSPPGRSPQR2020200020000                   | sp Q8WYP5 ELYS_HUMAN  |
| 6944 | VSPSPDEHQEAENAVSSGNR20000000000000000000        | sp Q9BXS6 NUSAP_HUMAN |
| 6945 | KDPSGASNPADSPLHR2000000                         | sp P55317 FOXA1_HUMAN |
| 6946 | SEVESTTESQDK2000000000000000                    | sp Q5UIP0 RIF1_HUMAN  |
| 6947 | FDIYDPFHPTDEAYSPPPAPEQK20000000000              | sp Q9H7N4 SFR19_HUMAN |
| 6948 | REEQTDSDGESVTHHIR22000000000000                 | sp P36915 GNL1_HUMAN  |
| 6949 | SRSSSVGSSSYPISPAISR2220000000000000             | sp Q15149 PLEC_HUMAN  |
|      |                                                 | sp P30510 1C14_HUMAN  |
|      |                                                 | sp Q9TNN7 1C05_HUMAN  |
|      |                                                 | sp P04222 1C03_HUMAN  |
|      |                                                 | sp Q07000 1C15_HUMAN  |
|      |                                                 | sp Q29865 1C18_HUMAN  |
| 6950 | GGSCSQAASSNSAQGSDESLIACK20002002000000          | sp Q29960 1C16_HUMAN  |
|      |                                                 | sp Q29963 1C06_HUMAN  |
|      |                                                 | sp P30504 1C04_HUMAN  |
|      |                                                 | sp P30505 1C08_HUMAN  |
|      |                                                 | sp P30508 1C12_HUMAN  |
|      |                                                 | sp Q95604 1C17_HUMAN  |
| 6951 | SPRPDHPGTPPHK20000000200000                     | sp P30291 WEE1_HUMAN  |
| 6952 | ASPSKPASAPASR2000000000000000                   | sp P27816 MAP4_HUMAN  |
| 6953 | SAMDSPVPASMFAPESPSPAAR1.00000001E+21            | sp O00178 GTPB1_HUMAN |
| 6954 | VQEHEDSGDSEVENEAK2000000000                     | sp Q9Y5J1 UTP18_HUMAN |
| 6955 | VDEDSAEDTQSNKGKEVVEVGQK2000000000000000         | sp Q9H2G2 SLK_HUMAN   |
| 6956 | SELSQDAEPAGSQETK200                             | sp Q9BVJ6 UT14A_HUMAN |
| 6957 | EFSGGSYSAK2000000000                            | sp Q5VT25 MRCKA_HUMAN |
| 6958 | TVASDLQK200200000                               | sp Q7L8J4 3BP5L_HUMAN |
| 6959 | EHHPEEGSSGSEVEEIPETPCESQGEELK2.202E+22          | sp Q12888 TP53B_HUMAN |
| 6960 | VSPSPQESLSSSK202000000000                       | sp Q5JSH3 WDR44_HUMAN |
| 6961 | EVSPDPSTGAASPASSSAGGSAAR2.0002E+23              | sp P23769 GATA2_HUMAN |
| 6962 | SFLESNYFTKPNLK2000000000000000                  | sp O60293 ZC3H1_HUMAN |
| 6963 | DSGRGDSVSDSGSDALR20000000000000000000           | sp Q53EL6 PDCD4_HUMAN |
| 6964 | GEFSASPMLK201000                                | sp Q9UQ35 SRRM2_HUMAN |
| 6965 | LEPNSPMHGGTLLLEDVVGGR20000000000000000000       | sp Q7Z4H7 HAUS6_HUMAN |
| 6966 | ESRQESDPEDDDVKKPALQSSVATSK2.0002E+26            | sp Q9H307 PININ_HUMAN |
| 6967 | APSASDSKADSDGAKPEPVAMAR2.0002020002E+23         | sp Q7Z4V5 HDGR2_HUMAN |
| 6968 | SLSPVAAPPLREPR2020000000000000                  | sp Q8NDT2 RB15B_HUMAN |
| 6969 | MLSQDAPTVK2000000000                            | sp O60934 NBN_HUMAN   |
| 6970 | EHQTSAYSPPR20000                                | sp Q96K21 ANCHR_HUMAN |
| 6971 | SGSMEEDVDTSPGGDYITSPSSPTSSSR1.0000000000033E+25 | sp P08651 NFIC_HUMAN  |
| 6972 | QLWDSPETAPAAR20000000000                        | sp Q9Y613 FHOD1_HUMAN |

|      |                                                     |                       |
|------|-----------------------------------------------------|-----------------------|
| 6973 | SEACPCQPDSGSPLPAEEEEK2000000000                     | sp Q14160 SCRIB_HUMAN |
| 6974 | APSDTGSLSPWDQDRR2000202000000000                    | sp O15320 CTGE5_HUMAN |
| 6975 | LPAYLATSPIPTEDQFFK20000000000000                    | sp Q92539 LPIN2_HUMAN |
| 6976 | SPVGKSPSTGSTYGSSQK2.00002002E+19                    | sp Q9Y2W1 TR150_HUMAN |
| 6977 | VETVSPSESPKDTIDK20020000000000                      | sp Q99590 SCAFB_HUMAN |
| 6978 | SPQPDPVDTASTK200000002002000                        | sp P46013 KI67_HUMAN  |
| 6979 | RTPSPPPR20200000                                    | sp Q8IYB3 SRRM1_HUMAN |
| 6980 | IPSIVSSPLNSPLDR200000                               | sp P49790 NU153_HUMAN |
| 6981 | ATSSSNPSSPAPDWYK2200000000                          | sp P46100 ATRX_HUMAN  |
| 6982 | VKASPIITNDGEDEFVPSDGLDKDEYTFSPGK2.0000000000002E+28 | sp Q02880 TOP2B_HUMAN |
| 6983 | SPSPAPPPR20000000                                   | sp Q8IYB3 SRRM1_HUMAN |
| 6984 | RHEHPPNPPVSPGK20000                                 | sp Q6VMQ6 MCAF1_HUMAN |
| 6985 | DEDMLYSPELAQR20000000                               | sp Q9Y2W2 WBP11_HUMAN |
| 6986 | LASPSGSTSSGLEVVAPEGTSAPGGGPGTLDDSATICR2.2E+32       | sp Q13263 TIF1B_HUMAN |
| 6987 | NLVSPAYCTQESREEIPGGEAR200000000000                  | sp Q9NUQ3 TXLNG_HUMAN |
| 6988 | SMSENAVR2000000                                     | sp Q9GZY8 MFF_HUMAN   |
| 6989 | SSLSPSSAYER202000000000                             | sp Q9BYW2 SETD2_HUMAN |
| 6990 | AAESETPGKSPEK200000000000                           | sp O76021 RL1D1_HUMAN |
| 6991 | GASAATGIPLESDEDSNDNDNDIENENCMHTN2.0002E+21          | sp Q9Y4E8 UBP15_HUMAN |
| 6992 | SHEAEVLK200000000                                   | sp P16949 STMN1_HUMAN |
| 6993 | SSPQLDPLRK2000000000                                | sp Q8ND56 LS14A_HUMAN |
| 6994 | KAPSASDSKADSDGAKPEPVAMAR2.0202000002E+23            | sp Q7Z4V5 HDGR2_HUMAN |
| 6995 | ESAAPASPAPSPAPSPAPPQK200000000000000000             | sp Q3KQU3 MA7D1_HUMAN |
| 6996 | SETSSNPSSPEICPNK22002000000000                      | sp Q684P5 RPGP2_HUMAN |
| 6997 | DVDDGSGSPHSPHQLSSK20200200002000                    | sp Q9H4A3 WNK1_HUMAN  |
| 6998 | EQSEVSVSPR202000                                    | sp Q7L4I2 RSRC2_HUMAN |
|      |                                                     | sp Q9TNN7 1C05_HUMAN  |
|      |                                                     | sp P04222 1C03_HUMAN  |
|      |                                                     | sp Q07000 1C15_HUMAN  |
|      |                                                     | sp Q29865 1C18_HUMAN  |
|      |                                                     | sp Q29960 1C16_HUMAN  |
| 6999 | GGSCSQAASSNSAQGSDESLIACK2E+20                       | sp Q29963 1C06_HUMAN  |
|      |                                                     | sp P30504 1C04_HUMAN  |
|      |                                                     | sp P30505 1C08_HUMAN  |
|      |                                                     | sp P30508 1C12_HUMAN  |
|      |                                                     | sp P30510 1C14_HUMAN  |
|      |                                                     | sp Q95604 1C17_HUMAN  |
|      |                                                     | sp Q9TNN7 1C05_HUMAN  |
|      |                                                     | sp P04222 1C03_HUMAN  |
|      |                                                     | sp Q07000 1C15_HUMAN  |
|      |                                                     | sp Q29865 1C18_HUMAN  |
|      |                                                     | sp Q29960 1C16_HUMAN  |
| 7000 | GGSCSQAASSNSAQGSDESLIACKA20020000000                | sp Q29963 1C06_HUMAN  |
|      |                                                     | sp P30504 1C04_HUMAN  |
|      |                                                     | sp P30505 1C08_HUMAN  |
|      |                                                     | sp P30508 1C12_HUMAN  |
|      |                                                     | sp P30510 1C14_HUMAN  |
|      |                                                     | sp Q95604 1C17_HUMAN  |
| 7001 | SSGHSSSELSPDAVEK2002200000000000                    | sp Q9UQ35 SRRM2_HUMAN |
| 7002 | ANSPEKPPEAGAAHKPR2000000000000000                   | sp Q9UFC0 LRWD1_HUMAN |
| 7003 | MEREDSSEEEEEIDDEEIER1.000022E+21                    | sp P55081 MFAP1_HUMAN |
| 7004 | LLHNSEDEQLKSEIEEEELK200002002000000000              | sp Q9NSI6 BRWD1_HUMAN |
| 7005 | SPTLSQVHSPLVTSANLK20002200000000                    | sp Q86UU0 BCL9L_HUMAN |
| 7006 | LVEDERSDREETESSEGEAAAGGAK2.00002022E+21             | sp Q96G23 CERS2_HUMAN |

|      |                                                                     |                                                                                                                                                                                      |
|------|---------------------------------------------------------------------|--------------------------------------------------------------------------------------------------------------------------------------------------------------------------------------|
| 7007 | SRSSSVGSSSSYPISPAVSR2. 022E+20                                      | sp Q15149 PLEC_HUMAN                                                                                                                                                                 |
| 7008 | SSPQHSLSNPLPR22000200000000                                         | sp Q86UE8 TLK2_HUMAN                                                                                                                                                                 |
| 7009 | QLLQTLQAAEGEAAAAAGAGAGAAAAGAEGPGSPGVPSPPEAASEPPTGLR2.<br>000002E+20 | sp Q8N196 SIX5_HUMAN                                                                                                                                                                 |
| 7010 | SEAEEGEVRTPTK20000000000200                                         | sp Q9H4G0 E41L1_HUMAN                                                                                                                                                                |
| 7011 | AGHDGDSGDSDDEEGYFICPITDDPSSNQVNSK2. 0000000003E+29                  | sp 000418 EF2K_HUMAN                                                                                                                                                                 |
| 7012 | ITVQASPNDK2000000                                                   | sp Q5TCX8 M3KL4_HUMAN                                                                                                                                                                |
| 7013 | DTLSNPQSPQSPYNSPKPQHK203000000000                                   | sp Q96PU5 NED4L_HUMAN                                                                                                                                                                |
| 7014 | SLSPVAAPPLR2000000000                                               | sp Q8NDT2 RB15B_HUMAN                                                                                                                                                                |
| 7015 | TDHGAEIVYKSPVSGDTSR200000022000                                     | sp TAU_HUMAN <br>sp P10636 TAU_HUMAN<br>sp P05534 1A24_HUMAN<br>sp Q09160 1A80_HUMAN<br>sp P30447 1A23_HUMAN<br>sp P01891 1A68_HUMAN<br>sp P01892 1A02_HUMAN<br>sp P10316 1A69_HUMAN |
| 7016 | GGSYSQAASSDSAQGSVDVSLTACK2002000000                                 | sp P49790 NU153_HUMAN                                                                                                                                                                |
| 7017 | DSTSQHDDDNISTTSGFSSRASDKDITVSK2. 222002E+19                         | sp Q9H6B4 CLMP_HUMAN                                                                                                                                                                 |
| 7018 | LVKPSSSSSGSR200                                                     | sp P29375 KDM5A_HUMAN                                                                                                                                                                |
| 7019 | VVSSVSSPR200000                                                     | sp P25440 BRD2_HUMAN                                                                                                                                                                 |
| 7020 | ADTTTPTPTAILAPGSPASPPGSLEPK2002000000000                            | sp Q8IWB9 TEX2_HUMAN                                                                                                                                                                 |
| 7021 | SPLQSAESSPTAGK200000022000000                                       | sp Q13523 PRP4B_HUMAN                                                                                                                                                                |
| 7022 | EQPEMEDANSEKSINEENGEVSEDQSQNK2. 002000000002E+20                    | sp Q5T200 ZC3HD_HUMAN                                                                                                                                                                |
| 7023 | TPSPSYQR202000000                                                   | sp Q9HB19 PKHA2_HUMAN                                                                                                                                                                |
| 7024 | SQSYIPTSGCR2000000000                                               | sp P49585 PCY1A_HUMAN                                                                                                                                                                |
| 7025 | TSPPCSPANLSR200000000000                                            | sp Q9UK61 F208A_HUMAN                                                                                                                                                                |
| 7026 | SSDYQFPSSPFTDTLK2000002000000000                                    | sp Q8WXG6 MADD_HUMAN                                                                                                                                                                 |
| 7027 | SPTESVNTPVGK20000000000                                             | sp Q9UHI6 DDX20_HUMAN                                                                                                                                                                |
| 7028 | SYLEGSSDNQLK22000000                                                | sp 075691 UTP20_HUMAN                                                                                                                                                                |
| 7029 | AESDGEEKEEVK20000000000                                             | sp Q9BRD0 BUD13_HUMAN                                                                                                                                                                |
| 7030 | HDPDPSPRLR200020000                                                 | sp Q8IWS0 PHF6_HUMAN                                                                                                                                                                 |
| 7031 | DRSPHRSSPSDTRPK20002000000000                                       | sp P53365 ARFP2_HUMAN                                                                                                                                                                |
| 7032 | HPSHSTTPSGPGDEVAR200000000000                                       | sp Q9NQX3 GEPH_HUMAN                                                                                                                                                                 |
| 7033 | EVHDELEDLPSPPPPLSPPTTSPHK20000000000220000                          | sp Q8TB61 S35B2_HUMAN                                                                                                                                                                |
| 7034 | AVPVESPQKV2000000                                                   | sp Q7Z4V5 HDGR2_HUMAN                                                                                                                                                                |
| 7035 | GSGGSSGDELREDDEPVKK20022000000000000000                             | sp 095359 TACC2_HUMAN                                                                                                                                                                |
| 7036 | LDNTPASPPRSPAEPNDIPIAK200020000000000000                            | sp Q96RL1 UIMC1_HUMAN                                                                                                                                                                |
| 7037 | LEDAFIVISDSGEEP2020000000                                           | sp Q9NYV4 CDK12_HUMAN                                                                                                                                                                |
| 7038 | RQSVSPPYKEPSAYQSSTR200300000000000000                               | sp Q14839 CHD4_HUMAN                                                                                                                                                                 |
| 7039 | MSQPGSPSPKPTPTSTPGDTQPNTAPVPPAEDGIK2. 0002E+35                      |                                                                                                                                                                                      |
| 7040 | REPGSGTESDTSDFHNQENEPSQEDPEDLDGVSQGVKPK2. 00000000002<br>E+30       | sp Q9HAF1 EAF6_HUMAN                                                                                                                                                                 |
| 7041 | TNSSSSSPVVLK20000000000                                             | sp Q7Z589 EMSY_HUMAN                                                                                                                                                                 |
| 7042 | GTDDLNPVTSTPAKPSSPPPEFSFNTPGK20000000000000                         | sp Q6NXT4 ZNT6_HUMAN                                                                                                                                                                 |
| 7043 | SHLLSSSDAEGNYR200000000                                             | sp Q12830 BPTF_HUMAN                                                                                                                                                                 |
| 7044 | EVEEDSEDEEMSEDEEDSSGEEVVIPQKK2. 00000200000022E+25                  | sp P19338 NUCL_HUMAN                                                                                                                                                                 |
| 7045 | GGIDNPAITSDQELDDKK2000000000                                        | sp Q13017 RHG05_HUMAN                                                                                                                                                                |
| 7046 | VGVEASEETPQTSSSSARPGTSPDHQSQEASQFER2. 00002E+20                     | sp Q6Y7W6 PERQ2_HUMAN                                                                                                                                                                |
| 7047 | SSSQRSPSPGNHTSNSSNASNATVVPQNSSAR2. 002E+31                          | sp Q9BTA9 WAC_HUMAN                                                                                                                                                                  |
| 7048 | SRTSPVTR200200000                                                   | sp Q9UQ35 SRRM2_HUMAN                                                                                                                                                                |
| 7049 | LSPERSDSESNENEPHLPHGVSQR2. 00002E+24                                | sp Q9BQ52 RNZ2_HUMAN                                                                                                                                                                 |
| 7050 | KRSPSPSPTPEAK200000000000                                           | sp Q8TAQ2 SMRC2_HUMAN                                                                                                                                                                |
| 7051 | EAYSGCSGPVDECPSPSPVHK200000                                         | sp Q8N556 AFAP1_HUMAN                                                                                                                                                                |
| 7052 | ESISPQPADSACSSPAPSTGK2200000000                                     | sp Q9GZR1 SENP6_HUMAN                                                                                                                                                                |

|      |                                                                  |    |        |             |
|------|------------------------------------------------------------------|----|--------|-------------|
| 7053 | NGDECAYHHPISPCCK20000                                            | sp | Q6PJT7 | ZC3HE_HUMAN |
| 7054 | SPFNPSPPQDSR20002000                                             | sp | P08651 | NFIC_HUMAN  |
| 7055 | YYEDLDEVSTSSVSQSLESEDAR2200000000000000                          | sp | P35658 | NU214_HUMAN |
| 7056 | ESISQPADSACSSPAPSTGK20000000000000000000                         | sp | Q9GZR1 | SENP6_HUMAN |
| 7057 | APSPAPSSVPLGSEKPSNVSQDR2E+21                                     | sp | 075179 | ANR17_HUMAN |
| 7058 | ENSSPSVTSANLDHTKPCWYWDK2E+21                                     | sp | 075909 | CCNK_HUMAN  |
| 7059 | HNDIVSDSDAEDRGTLAELTAAHFGGGGGLLHK20002000000000000000            | sp | P78316 | NOP14_HUMAN |
| 7060 | WDETPASQMGSTPVLTPGK200000000                                     | sp | 075533 | SF3B1_HUMAN |
| 7061 | TADSSSEDEEEYVVEK20020220000000000000                             | sp | P45973 | CBX5_HUMAN  |
| 7062 | TLSPTPASATAPTSQGIPTSDEESTPK2000020000000000                      | sp | Q9NQS7 | INCE_HUMAN  |
| 7063 | TISQSSSLK20000000                                                | sp | Q9UHB7 | AFF4_HUMAN  |
| 7064 | SLSYSPVER2000200000                                              | sp | Q9UQ35 | SRRM2_HUMAN |
| 7065 | SPQTLAPVGEDAMK20000000000000                                     | sp | Q92797 | SYMPK_HUMAN |
| 7066 | IDFIPVSPAPSPTR200020000                                          | sp | Q96E09 | F122A_HUMAN |
| 7067 | DDGDEGLLTHSEEELEHSQTDADDGALQ20020000000000                       | sp | Q9UKM9 | RALY_HUMAN  |
| 7068 | REESPMVDVQPSAQTQSIASDGTQGEK2.01000002E+28                        | sp | Q7Z6Z7 | HUWE1_HUMAN |
| 7069 | VQMTSPSSTGSPMFK12000000001000                                    | sp | P49790 | NU153_HUMAN |
| 7070 | YSPSQNSPIHHIPSR2000000000                                        | sp | Q9NYF8 | BCLF1_HUMAN |
| 7071 | EKPELSEPSHLNGPSSDPEAAFLSR200000000000                            | sp | Q9H4A3 | WNK1_HUMAN  |
| 7072 | AGPDLPSLPSHALEDEGWAAAAPSGAR2000                                  | sp | Q9H3Q1 | BORG4_HUMAN |
| 7073 | GQKPALDCSQVSPRPATSPENNASLSDTSPMDSSPSGIPK202000000000000000000000 | sp | P18858 | DNLI1_HUMAN |
| 7074 | TENGTCPSPQPPLSPAAALGSGSAAAVPK2.0000000000002E+29                 | sp | Q12948 | FOXC1_HUMAN |
| 7075 | RISQSQPVR20000000                                                | sp | 095071 | UBR5_HUMAN  |
| 7076 | SNSSSEAVLGQEELSAQAK2E+19                                         | sp | Q9BXF6 | RFIP5_HUMAN |
| 7077 | LASTSDIEEK220000000                                              | sp | 014974 | MYPT1_HUMAN |
| 7078 | KRPSLPSSPGLPK2002000000000                                       | sp | 043294 | TGFI1_HUMAN |
| 7079 | IADLQSPLFR200000                                                 | sp | Q9NZJ4 | SACS_HUMAN  |
| 7080 | SPGKAEAESDALPDDTVIESEALPSDIAAEAR20000000000000000000             | sp | Q9GZR7 | DDX24_HUMAN |
| 7081 | SGTSSPQSPVFR2000200000                                           | sp | Q8N556 | AFAP1_HUMAN |
| 7082 | TGDLGIPPNEPDRSPSEPIYNSEGK20200000000000                          | sp | Q15637 | SF01_HUMAN  |
| 7083 | SPPRSPPSPPTHR200002000000000000                                  | sp | Q96HA1 | P121A_HUMAN |
| 7084 | TPESQPDTPPGTPLVSQDEK2000200000000000                             | sp | Q96T60 | PNKP_HUMAN  |
| 7085 | GRLSPVPVPR20000000                                               | sp | Q9UKM9 | RALY_HUMAN  |
| 7086 | GDTPGHATPGHGATSSAR20000000000000000000                           | sp | 075533 | SF3B1_HUMAN |
| 7087 | RDYDDMSPR2000                                                    | sp | P61978 | HNRPK_HUMAN |
| 7088 | LPSDTPDSDASEDPGGAER20020020000000000000                          | sp | Q9UJK0 | TSR3_HUMAN  |
| 7089 | KPSKYPLCSADAAVSTTPPGSPPPPPLPEPPVLK2.2E+20                        | sp | Q9BTC0 | DIDO1_HUMAN |
| 7090 | LEVSPQAQTAR2000000000                                            | sp | Q6WKZ4 | RFIP1_HUMAN |
| 7091 | LSNCDPPPTYEEATGQVNLQR2E+20                                       | sp | 014668 | TMG1_HUMAN  |
| 7092 | TFSATVR200000                                                    | sp | Q9Y2V2 | CHSP1_HUMAN |
| 7093 | IDFIPVSPAPSPTR20000                                              | sp | Q96E09 | F122A_HUMAN |
| 7094 | RDSSSHEETPGSHPLYGHGECK20000000000000                             | sp | Q8IVH2 | FOXP4_HUMAN |
| 7095 | QPSWDSPVSPSTVPAPSPLSAAAVSPSK2.0002E+26                           | sp | Q9NQC3 | RTN4_HUMAN  |
| 7096 | GYSSPEPDIQDSSGSEAQSVKPSTR2020000000000000                        | sp | Q9BZF1 | OSBL8_HUMAN |
| 7097 | KETTSGTSTEPVKNSPAPPQAPGK20000000000000                           | sp | Q9NYV4 | CDK12_HUMAN |
| 7098 | AAKPGPAEAPSPTASPSGDASPPATAPYDPR2.02E+19                          | sp | Q9UPT8 | ZC3H4_HUMAN |
|      |                                                                  | sp | Q09160 | 1A80_HUMAN  |
|      |                                                                  | sp | P05534 | 1A24_HUMAN  |
|      |                                                                  | sp | P30447 | 1A23_HUMAN  |
| 7099 | GGSYSQAASSDSAQGSVSLTACK2000000                                   | sp | P01891 | 1A68_HUMAN  |
|      |                                                                  | sp | P01892 | 1A02_HUMAN  |
|      |                                                                  | sp | P10316 | 1A69_HUMAN  |

|      |                                                    |                       |
|------|----------------------------------------------------|-----------------------|
| 7100 | NSSQSGGKPGSSPITK2000000                            | sp Q15648 MED1_HUMAN  |
| 7101 | HASAPSHVQPSDSEK20000000000000                      | sp O60343 TBCD4_HUMAN |
| 7102 | RLSSSESPQRDPPPPPPPPPLLR2.0002E+21                  | sp Q9H2G4 TSYL2_HUMAN |
| 7103 | SSDEENGPPSSPDLDR2000000022000000                   | sp Q96B36 AKTS1_HUMAN |
| 7104 | TASPLLRPDAPVEK2020000000000000                     | sp Q9HCK8 CHD8_HUMAN  |
| 7105 | TLSDDISCPLESDLAYSDDDVPVYENGLSQK2.0000000003E+27    | sp Q6PL18 ATAD2_HUMAN |
| 7106 | LSMEDSKSPPPK10000200000                            | sp Q9NQG5 RPR1B_HUMAN |
| 7107 | SSLSSHSHQSQIYR20200000000                          | sp O15027 SC16A_HUMAN |
| 7108 | DDSHSAEDESEDEKEDHKNVR2020000000000000000           | sp Q9H1E3 NUCKS_HUMAN |
| 7109 | FSISPDDESSSYSSNSDFNYSYPTK2022000000000000          | sp Q96QD8 S38A2_HUMAN |
| 7110 | RESVNLGK2000000                                    | sp P46013 KI67_HUMAN  |
| 7111 | GNDPLTSSPGR2020000                                 | sp P49736 MCM2_HUMAN  |
| 7112 | RPAEATSSPTSPERPR2002000000                         | sp Q9BU76 MMTA2_HUMAN |
| 7113 | MSPKPELTEEK2000000000000                           | sp P41208 CETN2_HUMAN |
| 7114 | SRSFDYNYR20000000000                               | sp O75494 SRS10_HUMAN |
| 7115 | QVLTAPEGAGQPRSEDEDSLEEAGSPAGPCPR2E+30              | sp Q8TBB5 KLDC4_HUMAN |
| 7116 | ATVTPSPVKGK202000000                               | sp Q9H1E3 NUCKS_HUMAN |
| 7117 | SYSSPDITQAIQEEER20000000000000000000               | sp P40818 UBP8_HUMAN  |
| 7118 | LVDVSPDRGSPPSR20000200000                          | sp Q9NYZ3 GTSE1_HUMAN |
| 7119 | KNSSTDQGSDEEGLQK20002000000000                     | sp Q12789 TF3C1_HUMAN |
| 7120 | ASPAPGSGHPEGGAHLDMNSLDR2E+23                       | sp O94826 TOM70_HUMAN |
| 7121 | KGSDALRPPVQGEDEVPK2000000000000000000              | sp Q8N3D4 EH1L1_HUMAN |
| 7122 | GNKSPSPDGSPAATPEIR2000020000000000                 | sp O00499 BIN1_HUMAN  |
| 7123 | AASSAAQGAQGN20000000000                            | sp O15127 SCAM2_HUMAN |
| 7124 | KRSPSPSPTPEAK20000200000                           | sp Q8TAQ2 SMRC2_HUMAN |
| 7125 | GPPSPAPVMHSPSR2000001000200                        | sp Q13573 SNW1_HUMAN  |
| 7126 | ESSPEKEAEEGCEK2000000000000000                     | sp O43719 HTSF1_HUMAN |
| 7127 | AYLGYQAVPSGSSGLSTSSSSPPGTPSPADAK2000200000000      | sp P17676 CEBPB_HUMAN |
| 7128 | RHSHSHSPMSTR200002000000                           | sp P62995 TRA2B_HUMAN |
| 7129 | LTPVSLNSPIK200000020000                            | sp P46100 ATRX_HUMAN  |
| 7130 | KVPVPEGLDLDAWINEPLSDSESEDERPR202020000000          | sp O14617 AP3D1_HUMAN |
| 7131 | STDEYSEADEEEEEEGKPSR2.0002E+20                     | sp Q96T23 RSF1_HUMAN  |
| 7132 | AGGPTPLSPTR20020000                                | sp P20700 LMNB1_HUMAN |
| 7133 | SERPPTILMTEEPSSPK1000002000                        | sp Q5VZK9 LR16A_HUMAN |
| 7134 | TSFVSGSDELGPIR2000020000000000                     | sp Q9NRY4 RHG35_HUMAN |
| 7135 | DISEGGESPVVQSDEEEVQVDTALATSHTDR2.00002E+29         | sp Q96EV8 DTBP1_HUMAN |
| 7136 | GSSPTPPCSPVQPSK20200020000000                      | sp Q9NUL3 STAU2_HUMAN |
| 7137 | SPQRSPLQSAESSPTAGK2000200020002000000              | sp Q8IWB9 TEX2_HUMAN  |
| 7138 | LGGDEGYEEEEEDENSRQSEDDSETEKPEADDPK2.0000000002E+20 | sp Q9UHR5 S30BP_HUMAN |
| 7139 | TAHNSEADLEESFNEHELEPSSPK2000                       | sp Q8IWS0 PHF6_HUMAN  |
| 7140 | LNSDDTYQTALLSGSDEE2020000                          | sp Q96B21 TM45B_HUMAN |
| 7141 | HGTDLWIDNMSSAVPNHSPEK20000                         | sp Q8N6H7 ARFG2_HUMAN |
| 7142 | TSPADHGGVSGSESGSAVDSVAGEHSVSGR2.00202E+23          | sp Q5T4S7 UBR4_HUMAN  |
| 7143 | TRESHRSRSSPTAGPSTEGAEGPEEK2.002022E+24             | sp Q8NHM5 KDM2B_HUMAN |
|      |                                                    | sp P49792 RBP2_HUMAN  |
|      |                                                    | sp Q7Z3J3 RGPD4_HUMAN |
|      |                                                    | sp O14715 RGPD8_HUMAN |
| 7144 | DSLITPHVSR2000200                                  | sp Q99666 RGPD5_HUMAN |
|      |                                                    | sp A6NKT7 RGPD3_HUMAN |
|      |                                                    | sp PODJD0 RGPD1_HUMAN |
|      |                                                    | sp PODJD1 RGPD2_HUMAN |
| 7145 | GLPLGSAVSSPVLFSVGR200000                           | sp Q8WUM0 NU133_HUMAN |
| 7146 | SGECSPVPMGSFPR200020001000000                      | sp P25054 APC_HUMAN   |
| 7147 | SPAVATSTAAPPPSSPLPSK200000020000000                | sp Q14157 UBP2L_HUMAN |

|      |                                                  |                       |
|------|--------------------------------------------------|-----------------------|
| 7148 | YSPTSPTYSPVYTPSPK30000030002000                  | sp P24928 RPB1_HUMAN  |
| 7149 | SRSPTPQNQDGMTMVEK2000000000000000                | sp Q3KR37 GRM1B_HUMAN |
| 7150 | IESDVQEPTPEDDLIDLGNK2000000000000000             | sp P20042 IF2B_HUMAN  |
| 7151 | FTGSFDDDDPDRDPYGEVDR2E+19                        | sp O15027 SC16A_HUMAN |
| 7152 | VEVTSPNLDVSLPSMEVDIQAPGAK2E+21                   | sp Q8IVF2 AHNK2_HUMAN |
| 7153 | SPSPLGTSVR20200000000                            | sp Q86SQ0 PHLB2_HUMAN |
| 7154 | AAPPPALTPDSQTVDSCKTPEVSFLPEEATEEAGVR2.002E+30    | sp Q9H7N4 SFR19_HUMAN |
| 7155 | SHSESASPSALSSSPNLSPTGWSQPK2000000000             | sp P04049 RAF1_HUMAN  |
| 7156 | IYHPSCYEDYQNTSSFDCTSPSPK20000                    | sp O94913 PCF11_HUMAN |
| 7157 | TEMKSPFNPSQDSR20000020002000                     | sp P08651 NFIC_HUMAN  |
| 7158 | DGTAPPPQSPGSPGTGQDEEWSDEESPRK2.000000000002E+21  | sp Q9UKS6 PACN3_HUMAN |
| 7159 | GFGGAGELGQTPQVQAALSVSQENPEMEGPER20000000000000   | sp Q8NBJ4 GOLM1_HUMAN |
| 7160 | FSSVSSPQPR200000                                 | sp Q9P206 K1522_HUMAN |
| 7161 | GESAADSDGWSAPSDLR20000000000000                  | sp Q9BUL5 PHF23_HUMAN |
| 7162 | TVNSGGSSEPSPEVDVSR2000000000                     | sp Q6PIJ6 FBX38_HUMAN |
| 7163 | LPSSPASPSK200000                                 | sp Q9H4G0 E41L1_HUMAN |
| 7164 | SVIEGVEDSDISDDEPSVYSA20020000000000              | sp Q9NUN5 LMBD1_HUMAN |
| 7165 | TVSFSSMPTEK202000000000                          | sp Q9UPRO PLCL2_HUMAN |
| 7166 | ILSSMGNDKSSIAGSEDAEPLAPPIKPIKVTR2.20002E+24      | sp Q03164 KMT2A_HUMAN |
| 7167 | VQIPVSRDPEPVSNEEDSYDEEIHDP200000030000000000     | sp Q07157 ZO1_HUMAN   |
| 7168 | MLQAISPK2000                                     | sp P49585 PCY1A_HUMAN |
| 7169 | MHNLHGTKPPPSEGSDEEEEEDEEEDDEER200000000000000000 | sp Q9BQ67 GRWD1_HUMAN |
| 7170 | QQPEPEWIGDGESTSPSDK2000                          | sp Q8NE71 ABCF1_HUMAN |
| 7171 | GESLSLPGSPPPDGTEQVIISR2E+19                      | sp Q9BZQ8 NIBAN_HUMAN |
| 7172 | APGYSSPVTTASGTTLR20000000000000                  | sp Q9HCK8 CHD8_HUMAN  |
| 7173 | ETQSPEQVK2000000                                 | sp Q9NYF8 BCLF1_HUMAN |
| 7174 | AEEQQLPPLSPPSPSTPNHR200000200000                 | sp Q6WCQ1 MPRIP_HUMAN |
| 7175 | SLSSGESGPGSPTHSHLSR2E+19                         | sp Q6P0Q8 MAST2_HUMAN |
| 7176 | QPGYQPPNPHGSPSPAAPASK2000000000                  | sp Q9BUL9 RPP25_HUMAN |
| 7177 | SVSEHTSCPAESASDAAPLQR2E+22                       | sp Q8WUA7 TB22A_HUMAN |
| 7178 | SNSQSDSHDEEVSPTPNPVVK20200000000000000000        | sp P31321 KAP1_HUMAN  |
| 7179 | EKFPEFCSSPSPVEVK20000000                         | sp Q68E01 INT3_HUMAN  |
| 7180 | SPSPGNHTSNSSNASNATVVPQNSSAR2.000002E+26          | sp Q9BTA9 WAC_HUMAN   |
| 7181 | GPEDYPEGVEESSGEASK22000000                       | sp Q2NKX8 ERC6L_HUMAN |
| 7182 | SPTGPSNSFLANMGTVAHK20000000000000                | sp Q96I25 SPF45_HUMAN |
| 7183 | STAPETAIECTQAPAPASEDEK200000                     | sp Q14839 CHD4_HUMAN  |
| 7184 | LAPVPSPEPQKPAVSPESVK2000000                      | sp Q96JM3 CHAP1_HUMAN |
| 7185 | EYDSGDTDEIIAMK30000200000100                     | sp Q76FK4 NOL8_HUMAN  |
| 7186 | ITPHTSPAPR2000200000                             | sp Q58A45 PAN3_HUMAN  |
|      |                                                  | sp P05534 1A24_HUMAN  |
|      |                                                  | sp P30447 1A23_HUMAN  |
| 7187 | GGSYSQAASSDSAQSDVSLTACKV200020020000000          | sp P01891 1A68_HUMAN  |
|      |                                                  | sp P01892 1A02_HUMAN  |
|      |                                                  | sp Q09160 1A80_HUMAN  |
|      |                                                  | sp P10316 1A69_HUMAN  |
| 7188 | SKSDGEAKPEPSPPR2000000000002000                  | sp P26358 DNMT1_HUMAN |
| 7189 | SGTSSPQSPVFR20200200000                          | sp Q8N556 AFAP1_HUMAN |
| 7190 | SNPESIAETPPAR2002000200000                       | sp Q9Y4H2 IRS2_HUMAN  |
| 7191 | AAESETPGKSPEK20000020000                         | sp O76021 RL1D1_HUMAN |
| 7192 | RLSSSATLLNSPDR2000000020000                      | sp Q14244 MAP7_HUMAN  |
| 7193 | SPPVDCPR200000000                                | sp Q5VZK9 LR16A_HUMAN |
| 7194 | TIQEVLEEQSEDEDREK2000000000                      | sp P18858 DNLI1_HUMAN |
| 7195 | VLSTSSLTR200200000                               | sp P16144 ITB4_HUMAN  |
| 7196 | SRSGSSQELDVKPSASPQR202200000000200000            | sp Q9UQ35 SRRM2_HUMAN |

|      |                                             |                       |
|------|---------------------------------------------|-----------------------|
| 7197 | SLSPGVS200000000                            | sp Q9UKV3 ACINU_HUMAN |
| 7198 | LSPERSSDSESNENEPHLPHGVSQR2.0002202E+24      | sp Q9BQ52 RNZ2_HUMAN  |
| 7199 | LLDPSSPPTK200000                            | sp Q6IAA8 LTOR1_HUMAN |
| 7200 | ADTSQEICSPR2000                             | sp P52948 NUP98_HUMAN |
| 7201 | KASGSENEGDPNPR200000000000                  | sp Q02880 TOP2B_HUMAN |
| 7202 | SDAEEDGGTVSQEEEDRKPK2E+20                   | sp P27824 CALX_HUMAN  |
| 7203 | TQPDGTSVPGEPASISQR200000000000000           | sp Q14980 NUMA1_HUMAN |
| 7204 | SISLSQSAENVPASK200000000000000              | sp Q4ADV7 RIC1_HUMAN  |
| 7205 | GNSPPSSGEACR200000000000                    | sp P41227 NAA10_HUMAN |
| 7206 | LSVHDMKPLDSPGR20000                         | sp Q15643 TRIPB_HUMAN |
| 7207 | ASSEGTAAGAGLDSLHK20000000000000000          | sp O15143 ARC1B_HUMAN |
| 7208 | HSASPVVFTSAR202000002000                    | sp O43166 SI1L1_HUMAN |
| 7209 | SDGACDSPSSDKENSSQIAQDHQK2000000000000000000 | sp Q9UIG0 BAZ1B_HUMAN |
| 7210 | DHGFVASTSPEDESPGSNPEPDATPFQEGLR2E+24        | sp P55211 CASP9_HUMAN |
| 7211 | EAGLSQSHDDLSTATATPSVR20000000000000000      | sp O14523 C2C2L_HUMAN |
| 7212 | QQLEEEAAKPEPEKPVSPPIESK2000000000           | sp Q9Y618 NCOR2_HUMAN |
| 7213 | IILPDDSSSEENNVNDK220000000000               | sp Q8IYD8 FANCM_HUMAN |
| 7214 | LTQAEISEQPTMATVVPVQVPTSPK2000               | sp Q70E73 RAPH1_HUMAN |
| 7215 | DTYSDRSGSSPDSEITELK2002022000000000000      | sp P17812 PYRG1_HUMAN |
| 7216 | AAEETPGKSPEK200020000                       | sp O76021 RL1D1_HUMAN |
| 7217 | NSPLDCGSASPKNK200000000000000               | sp O75179 ANR17_HUMAN |
| 7218 | SSDSESNENEPHLPHGVSQR2.02E+19                | sp Q9BQ52 RNZ2_HUMAN  |
| 7219 | APSPPSR200000                               | sp Q7Z2K8 GRIN1_HUMAN |
| 7220 | SSPEQPRPSTSK200000000000                    | sp P29590 PML_HUMAN   |
| 7221 | SVWGLAVQNSPK2000                            | sp P18615 NELFE_HUMAN |
| 7222 | VEMYSGSDDDDFNKLK200000000000000             | sp O60841 IF2P_HUMAN  |
| 7223 | TSIETNIR20000000                            | sp P14859 PO2F1_HUMAN |
| 7224 | VSPSPQESLSSSK202000000000000                | sp Q9UKI9 PO2F3_HUMAN |
| 7225 | LFEDDSNEKLFDEEEDSSEK2000000000022000        | sp Q5JSH3 WDR44_HUMAN |
| 7226 | EAPGSPPLSPR20002000                         | sp O43719 HTSF1_HUMAN |
| 7227 | SCSSPAVSAVSQLPLSPK200000002000              | sp Q86UU0 BCL9L_HUMAN |
| 7228 | ASGDPGASGMSPR2000                           | sp Q9Y2F5 ICE1_HUMAN  |
| 7229 | FRDQDLASCDR20000                            | sp Q8NDT2 RB15B_HUMAN |
| 7230 | YLVDTGKPNAGSEEISSEDELVEEK2.0000000022E+21   | sp Q9Y383 LC7L2_HUMAN |
| 7231 | KAPAGQEEPPTPSSPLSAEQQLDR200200000000000     | sp Q9NY61 AATF_HUMAN  |
| 7232 | CSDNSSYEEPLSPISASSSTR200000000000           | sp P13051 UNG_HUMAN   |
| 7233 | SPSFGAGEGLLR200000000000                    | sp Q8IXK0 PHC2_HUMAN  |
| 7234 | KPPDSYPPK200000                             | sp Q96PE2 ARHG_HUMAN  |
| 7235 | SCSSPAVSAVSQLPLSPK2000000000002000          | sp O43184 ADA12_HUMAN |
| 7236 | SDGACDSPSSDKENSSQIAQDHQK22000000000000000   | sp Q9Y2F5 ICE1_HUMAN  |
| 7237 | HSWGPGK2000000                              | sp Q9UIG0 BAZ1B_HUMAN |
| 7238 | YSPSPPK20200000                             | sp Q12802 AKP13_HUMAN |
| 7239 | IIPITLLEGLQLPSPTATSQLPLESDAVECLNYQHYK2E+24  | sp Q8IYB3 SRRM1_HUMAN |
| 7240 | EWNGVSESDSPVK20000                          | sp P61978 HNRPK_HUMAN |
| 7241 | NSPGSQVSNPR200000020000                     | sp P18858 DNLI1_HUMAN |
| 7242 | SPPGAEEPQAPPASR20000000000000000            | sp P18858 DNLI1_HUMAN |
| 7243 | KRPSLPSSPGLPK2000202000000                  | sp Q9HOD6 XRN2_HUMAN  |
| 7244 | TSISDPPESPPLLPPR200002000000000             | sp Q86VR2 F134C_HUMAN |
| 7245 | SPSSKPSLAVAVDSAPEVAVK2E+19                  | sp O43294 TGFI1_HUMAN |
| 7246 | QIASDSPHASPK20002000                        | sp Q07889 SOS1_HUMAN  |
| 7247 | EGKPEIEGKPESEGEPSGSETR200000000000          | sp O60508 PRP17_HUMAN |
| 7248 | ESISPPADSACSPPSTGK2.02E+20                  | sp Q9HCD6 TANC2_HUMAN |
| 7249 | FGSTGTPPVSPTPSER22000200000000              | sp Q96EI5 TCAL4_HUMAN |
|      |                                             | sp Q9GZR1 SENP6_HUMAN |
|      |                                             | sp Q969V6 MKL1_HUMAN  |



|      |                                                        |                       |
|------|--------------------------------------------------------|-----------------------|
| 7250 | NWTEDMEGGISSPVKK200000                                 | sp P08651 NFIC_HUMAN  |
| 7251 | YWEETVPTTAGASPGPPR2000000                              | sp O15213 WDR46_HUMAN |
| 7252 | IFDEVMGCFSDSPQSPTFPEAGHTSLYDEDK2.02E+23                | sp Q13085 ACACA_HUMAN |
| 7253 | AWLDEDSNLSPLR2020000                                   | sp Q9C086 IN80B_HUMAN |
| 7254 | STSAPQMSPGSSDNQSSSPQPAQK1.20022E+19                    | sp Q14157 UBP2L_HUMAN |
| 7255 | KRSPSPSPTPEAK200020000000                              | sp Q8TAQ2 SMRC2_HUMAN |
| 7256 | VVDYSQFQESDDADEDYGR300000000000000000                  | sp Q9H1E3 NUCKS_HUMAN |
| 7257 | SPSPALHPPQK200000000000                                | sp Q9H6S0 YTDC2_HUMAN |
| 7258 | SLRGSDALSETSSVSHIEDLEK2000202200000000000              | sp Q6P996 PDXD1_HUMAN |
| 7259 | KPHDCESSTVSEEDYFSSHR2220000000000000                   | sp Q9H4H8 FA83D_HUMAN |
| 7260 | TQSAPLPQNAQALQHLVIQQHQHFLEK2E+26                       | sp P56524 HDAC4_HUMAN |
| 7261 | GYYSYPVSVSGSGTAGSR30000000000200                       | sp Q15149 PLEC_HUMAN  |
| 7262 | SGYSSPGSPGTPGSR2000200000000                           | sp TAU_HUMAN          |
| 7263 | HSLSGSSPGMK20200200000                                 | sp P10636 TAU_HUMAN   |
| 7264 | SAPASPNHAGVLSAHSSGAQTPELSR2.0002E+27                   | sp Q9UQ35 SRRM2_HUMAN |
| 7265 | QLVAGNSPK2000                                          | sp Q01167 FOXK2_HUMAN |
| 7266 | SILKPSTPIPPQEGEEVGESSEEQDNAPK20000000000               | sp Q96EU6 RRP36_HUMAN |
| 7267 | DGDSYDPYDFSDTEEMPQVHTPK2.000000020001E+21              | sp Q9UDY2 ZO2_HUMAN   |
| 7268 | RTSVSPPEQPYPYR2002000000000                            | sp P25205 MCM3_HUMAN  |
| 7269 | TASESISNLSEAGSIKK200020000                             | sp Q8TEH3 DEN1A_HUMAN |
| 7270 | HNSESEVPSSMFILEDDR2000000000000000000                  | sp P30622 CLIP1_HUMAN |
| 7271 | RTFSLTEVR202000000                                     | sp Q6R327 RICTR_HUMAN |
| 7272 | RGLRDSHSSEDEASSQTDLSTISK2.022E+21                      | sp O95239 KIF4A_HUMAN |
| 7273 | VSKSPSPASTSTVPNMTDAPTAPK2.0020000001E+19               | sp Q5JTV8 TOIP1_HUMAN |
| 7274 | SRTPPVTR202000000                                      | sp Q659A1 ICE2_HUMAN  |
| 7275 | DYDDMSPR2000                                           | sp Q9UQ35 SRRM2_HUMAN |
| 7276 | RLSVGSSMR20002000                                      | sp P61978 HNRPK_HUMAN |
| 7277 | APSPLGPTR20000000                                      | sp Q8N370 LAT4_HUMAN  |
| 7278 | VHVQFFDDSPTR200                                        | sp Q0VG06 FP100_HUMAN |
| 7279 | KGGSYSQAASSDSAQGSVDVSLTACK2000000000                   | sp P52701 MSH6_HUMAN  |
| 7280 | SSSVTTSETQPTPSSSDYSDLQR20000000000000000               | sp P01891 1A68_HUMAN  |
| 7281 | KAPSASDSKADSDGAKPEPVAMAR2.02020002E+21                 | sp P10316 1A69_HUMAN  |
| 7282 | HGGSPQLATTPLSQEPVNPPEASPTR2000000020000000             | sp P01892 1A02_HUMAN  |
| 7283 | SRSPGRPPK2020000000                                    | sp P05534 1A24_HUMAN  |
| 7284 | FNISSHNQSPK2000                                        | sp P30447 1A23_HUMAN  |
| 7285 | SPTPPLFSLPEAR200000000000                              | sp Q09160 1A80_HUMAN  |
| 7286 | RPAVLPLELVGEGSNNTSTDGSLPSTPPPAEEEEDELYR200000000000000 | sp P50552 VASP_HUMAN  |
| 7287 | RKSQDLSLK20000000                                      | sp Q7Z4V5 HDGR2_HUMAN |
| 7288 | KESESDSSDDEPLIK2020002000000000                        | sp Q9UQ35 SRRM2_HUMAN |
| 7289 | SSSPTQYGLTK20000000000                                 | sp Q14739 LBR_HUMAN   |
| 7290 | CRSPGMLEPLGSSR2000000000000                            | sp Q9H1A4 APC1_HUMAN  |
| 7291 | KRESESEDETTPAAPQLIK20000000000000000                   | sp Q96FV9 THOC1_HUMAN |
| 7292 | EVSSRPSTPGLSVVSGISATSEDI PNK20000000000000000          | sp Q07820 MCL1_HUMAN  |
| 7293 | QSMDSPIK20000                                          | sp Q14693 LPIN1_HUMAN |
| 7294 | LEKSPLAGNK20000000                                     | sp P35659 DEK_HUMAN   |
| 7295 | KNATQPNAEEESGSSASEEEDTKPKPTK2022202000000000000        | sp Q9NYL2 MLTK_HUMAN  |
| 7296 | EPALPLEPDSGGNTSPGVTANGEAR2000000000000                 | sp Q9UQ35 SRRM2_HUMAN |
|      |                                                        | sp O60832 DKC1_HUMAN  |
|      |                                                        | sp Q14C86 GAPD1_HUMAN |
|      |                                                        | sp Q14562 DHX8_HUMAN  |
|      |                                                        | sp O75151 PHF2_HUMAN  |
|      |                                                        | sp Q68E01 INT3_HUMAN  |
|      |                                                        | sp Q92974 ARHG2_HUMAN |

|      |                                                  |                       |
|------|--------------------------------------------------|-----------------------|
| 7297 | ISMQDVDSLGLGSPK100000002000                      | sp Q09666 AHNK_HUMAN  |
| 7298 | NAASFPLRSPQVPCSPAGSEGTK20000020000000000         | sp Q6KC79 NIPBL_HUMAN |
| 7299 | QFTSSSSIKGSSGLGGSSR22000000000000000             | sp Q04695 K1C17_HUMAN |
| 7300 | SPTLSQVHSPLVTSPSANLK20002000200000000            | sp Q86UU0 BCL9L_HUMAN |
| 7301 | SGDETPGSEVPGDK200000020000000                    | sp Q1KMD3 HNRL2_HUMAN |
| 7302 | VVLGDGVQLPPGDYSTTPGGTLFSTTPGGTR20000000000000000 | sp Q13541 4EBP1_HUMAN |
| 7303 | FSPGAPGGSGSQPNQK20000000000000000                | sp Q15942 ZYX_HUMAN   |
| 7304 | LKDLFDYSPPLHK2000000                             | sp Q9NYF8 BCLF1_HUMAN |
| 7305 | RGSQNSSEHRPPASSTSEDVK2E+19                       | sp O15014 ZN609_HUMAN |
| 7306 | SPSTTYLHTPTSEDAAIIPSK2200000000000000000         | sp Q13111 CAF1A_HUMAN |
| 7307 | ATSPSSVSGDFDDGHHSVSTPGPSR2. 2E+21                | sp Q86U86 PB1_HUMAN   |
| 7308 | SPARTPPSEEDSAEAER2000200000000000000             | sp O43765 SGTA_HUMAN  |
| 7309 | ASLVALPEQTASEEETPPPLTK200000000                  | sp Q9UKV3 ACINU_HUMAN |
| 7310 | ERDHSPTPSVFNSEER20000000200000                   | sp Q6UN15 FIP1_HUMAN  |
| 7311 | GISPVVSEHR200000000                              | sp Q99700 ATX2_HUMAN  |
| 7312 | VYESECTDSEELNMK202020200000000                   | sp Q15054 DPOD3_HUMAN |
| 7313 | TDSVIIADQTPPTR2000000002000000                   | sp P17544 ATF7_HUMAN  |
| 7314 | AVEESSDEER2200000                                | sp Q9BW71 HIRP3_HUMAN |
| 7315 | KPSDGSPTKPSR200200000000                         | sp Q92733 PRCC_HUMAN  |
| 7316 | ADLNQIGEPQSPSR200                                | sp Q96C19 EFHD2_HUMAN |
| 7317 | VPASPLGLER200000000                              | sp Q7KZI7 MARK2_HUMAN |
| 7318 | DGDSYDPYDFSDTEEMPQVHTPK30000200000000000         | sp P25205 MCM3_HUMAN  |
| 7319 | GPSPTSPTPAAAAAPAEQAPR20000000000000000           | sp Q86VQ1 GLC11_HUMAN |
| 7320 | LDQPVSAAPPSPR20000000                            | sp Q16204 CCDC6_HUMAN |
| 7321 | TVSASSTGDLPK2020200000000                        | sp P78362 SRPK2_HUMAN |
| 7322 | RSPSPPPTR202000000                               | sp Q8IYB3 SRRM1_HUMAN |
| 7323 | SATFPNAGPR20000000000                            | sp Q86X27 RGPS2_HUMAN |
| 7324 | SSSPVTELASR220000000000                          | sp Q9UQ35 SRRM2_HUMAN |
| 7325 | SPACSSLTPSLCK20002000000000                      | sp Q96R06 SPAG5_HUMAN |
|      |                                                  | sp Q9TNN7 1C05_HUMAN  |
|      |                                                  | sp P04222 1C03_HUMAN  |
|      |                                                  | sp Q07000 1C15_HUMAN  |
|      |                                                  | sp Q29865 1C18_HUMAN  |
|      |                                                  | sp Q29960 1C16_HUMAN  |
| 7326 | GGSCSQAASSNSAQGSDESLIACK2000200000000            | sp Q29963 1C06_HUMAN  |
|      |                                                  | sp P30504 1C04_HUMAN  |
|      |                                                  | sp P30505 1C08_HUMAN  |
|      |                                                  | sp P30508 1C12_HUMAN  |
|      |                                                  | sp P30510 1C14_HUMAN  |
|      |                                                  | sp Q95604 1C17_HUMAN  |
| 7327 | ETNLDSLPLVDTHSK20000000000                       | sp P08670 VIME_HUMAN  |
| 7328 | TDGSISGDRQPVTVADYISR2. 002E+20                   | sp P51116 FXR2_HUMAN  |
| 7329 | TLTDEVNSPDSRRR20020000                           | sp Q8TAQ2 SMRC2_HUMAN |
|      |                                                  | sp Q09160 1A80_HUMAN  |
|      |                                                  | sp P05534 1A24_HUMAN  |
|      |                                                  | sp P30447 1A23_HUMAN  |
| 7330 | GGSYSQAASSDSAQGSVSLTACK2000000000000             | sp P01891 1A68_HUMAN  |
|      |                                                  | sp P01892 1A02_HUMAN  |
|      |                                                  | sp P10316 1A69_HUMAN  |
| 7331 | GIPHSASPVSPDGVQIPLK20200200000000000             | sp Q6PJF5 RHDF2_HUMAN |
| 7332 | SYSPDGKESPSDKK32000002000000                     | sp P43243 MATR3_HUMAN |
| 7333 | SGDEGSEDEAPSGED2000020000020000                  | sp Q9H1E3 NUCKS_HUMAN |
| 7334 | HNDIVSDSDAEDRGTLSAELTAAHFGGGGLLHK2. 02E+20       | sp P78316 NOP14_HUMAN |
| 7335 | SPTSSAIPLQSPR20000000002000                      | sp Q9ULD2 MTUS1_HUMAN |

|      |                                                                    |    |        |             |
|------|--------------------------------------------------------------------|----|--------|-------------|
| 7336 | SILKPSTPIPPQEGEEVGESSEEQDNAPK22000000000                           | sp | Q9UDY2 | ZO2_HUMAN   |
| 7337 | VDEDSAEDTQSNKGKEVVEVGQK2. 000002E+19                               | sp | Q9H2G2 | SLK_HUMAN   |
| 7338 | KPIDSLRDSRSLSYSPVER202003200000                                    | sp | Q9UQ35 | SRRM2_HUMAN |
| 7339 | AVSPAPQSSSR2000000000                                              | sp | Q9P275 | UBP36_HUMAN |
| 7340 | NSASATPLSGNSSR200                                                  | sp | Q9Y608 | LRRF2_HUMAN |
| 7341 | RPLSSSHEASEGQAK200000000000                                        | sp | Q8IZ21 | PHAR4_HUMAN |
| 7342 | LEGPPEANADPLGVLINSDSESDKEEKQHSVIPK2020200000000000000              | sp | Q9UHK0 | NUFP1_HUMAN |
| 7343 | LNETELTDLEGQQESPPKNYLCIEEEK20000000000000                          | sp | Q9ULF5 | S39AA_HUMAN |
| 7344 | ENSPAVSPTTNSTAPFGLKPR2. 0000002E+19                                | sp | Q9Y2L9 | LRCH1_HUMAN |
| 7345 | RESEDDPESEPDDHEK2000002000000000                                   | sp | P16383 | GCFC2_HUMAN |
| 7346 | RGEGDAPFSEPGTTSTQRPSPETATK2000200000000                            | sp | Q9UQ35 | SRRM2_HUMAN |
| 7347 | CAAPRPPSSSPEQR200000                                               | sp | Q5H9R7 | PP6R3_HUMAN |
| 7348 | QLPALDGLMGPESPPAQEEEEAPVSPHK1. 0002E+19                            | sp | Q8N9T8 | KRI1_HUMAN  |
| 7349 | SPMSTNSSVHTGSDVEQDAEK2. 000000000002E+21                           | sp | Q9ULU4 | PKCB1_HUMAN |
| 7350 | YSPTSPTYSPPTPK20000000000                                          | sp | P24928 | RPB1_HUMAN  |
| 7351 | SAFTPATATGSSPSPVLGQGEK200000000000                                 | sp | Q15811 | ITSN1_HUMAN |
| 7352 | MSESPTPCSGSSFEETEALVNTAAK2E+22                                     | sp | O95359 | TACC2_HUMAN |
| 7353 | TTSRSPVLSR202000000                                                | sp | O95819 | M4K4_HUMAN  |
| 7354 | EALAEAALESPPALVR200000000                                          | sp | O14745 | NHRF1_HUMAN |
| 7355 | SASADNLTLP200000000000                                             | sp | Q8ND76 | CCNY_HUMAN  |
| 7356 | GSISSTSEVHSPPNVGLR2000000000000000                                 | sp | Q8WWQ0 | PHIP_HUMAN  |
| 7357 | GEVISSGSKPLSPGPCLDIPSILSNK2. 000002E+21                            | sp | Q8TEP8 | CE192_HUMAN |
| 7358 | NQSHSSPSVSPSR200020000                                             | sp | Q7Z6E9 | RBBP6_HUMAN |
| 7359 | KRSPTESVNTVPVGK2000000000000                                       | sp | Q8WXG6 | MADD_HUMAN  |
| 7360 | KPPAPSPVQSQSPSTNWSPAVPVK2. 000000022002E+19                        | sp | Q8IYB3 | SRRM1_HUMAN |
| 7361 | KEDDSSQSSTCVVDTTTR20222000000000                                   | sp | Q5SNT2 | TM201_HUMAN |
| 7362 | SWGHEPSEER20000200000                                              | sp | Q9UKJ3 | GPTC8_HUMAN |
| 7363 | SRASPVSR200200000                                                  | sp | Q9UQ35 | SRRM2_HUMAN |
| 7364 | APYSPTTSK2000000                                                   | sp | Q96JH7 | VCIP1_HUMAN |
| 7365 | LEQTSVRDPSPEADAPVLGSPEKEEAASEPPAAAPDAAPPPDRPIEK2. 0000<br>0002E+29 | sp | O15234 | CASC3_HUMAN |
| 7366 | EECGDTALSSDEEDLSSWLPSSPAR2. 002E+20                                | sp | Q6P4R8 | NFRKB_HUMAN |
| 7367 | VKAQTPPGPSLSGSKSPCPQEK2000000000020000000                          | sp | Q9UQ35 | SRRM2_HUMAN |
| 7368 | TPLSFTNPLHSDDSDSDER2000000                                         | sp | Q05209 | PTN12_HUMAN |
| 7369 | RMSPKPELTEEK200000000000                                           | sp | P41208 | CETN2_HUMAN |
| 7370 | KTEAPAAPAAQETKSDGAPASDSKPGSSEAAPSSK2E+23                           | sp | P80723 | BASP1_HUMAN |
| 7371 | LDAEPKPCSDTNSDSPDEGLDHNHIK2. 020202E+19                            | sp | Q13129 | RLF_HUMAN   |
| 7372 | MEDLDQSPLVSSSDSPPRPQPAFK2000000020000000000                        | sp | Q9NQC3 | RTN4_HUMAN  |
| 7373 | YSQGGDDGSSSSGSSVAGSQSTLFLK2000000000000                            | sp | Q9UH99 | SUN2_HUMAN  |
| 7374 | GNKSPSPPDGSPAATPEIR20000000000000000                               | sp | O00499 | BIN1_HUMAN  |
| 7375 | ITETGAVKPTGECSGEQSPDTNYEPPGEDK2E+21                                | sp | P49454 | CENPF_HUMAN |
| 7376 | DSPTLSNSGIR20000000000                                             | sp | Q9HD20 | AT131_HUMAN |
| 7377 | KSPAKSPNPSTPR2000200020000                                         | sp | O76021 | RL1D1_HUMAN |
| 7378 | LSSDENSNPDLSGDENDDAVSIESGTNTERPDTPTNTPNAPGR20000200000<br>000000   | sp | O75530 | EED_HUMAN   |
| 7379 | SLPTTVPESPNYR20000200000                                           | sp | Q6PKG0 | LARP1_HUMAN |
| 7380 | DGDSYDYPDFSDTEEMPVHTPK300000000100000000                           | sp | P25205 | MCM3_HUMAN  |
| 7381 | QEAIPDLEDSPPVSDSEEQESAR2000002000000000                            | sp | Q9BTC0 | DIDO1_HUMAN |
| 7382 | ATAPQTQHVSPMR20100                                                 | sp | P29692 | EF1D_HUMAN  |
| 7383 | SPSVSPKQPVSTSSK2020000000000                                       | sp | Q96JG6 | CC132_HUMAN |
| 7384 | KSPSGPVKSPPLSPVGTTPVK2000000002000000000                           | sp | Q9BVC5 | ASHWN_HUMAN |
| 7385 | KRESESEDETTPAAPQLIK2000200000000000000                             | sp | O60832 | DKC1_HUMAN  |
| 7386 | HSSNPPLSHVGVWMSR20000000000010000                                  | sp | Q6PKG0 | LARP1_HUMAN |

|      |                                                    |                       |
|------|----------------------------------------------------|-----------------------|
| 7387 | KYSASSGGLCEEATAAK200000000000                      | sp Q9UHV7 MED13_HUMAN |
| 7388 | SPQTPSQMVPLPSANPPGPK202010000000000000             | sp Q86UU0 BCL9L_HUMAN |
| 7389 | ASLSSAPVVLVDHA2000000000000000                     | sp Q9HBH9 MKNK2_HUMAN |
| 7390 | TRDDGDEEGLLTHSEEELEHSQDTDADDGALQ2.000000002E+21    | sp Q9UKM9 RALY_HUMAN  |
| 7391 | YSKPTAPAPSAPPSPSAPEPPK20002000000000               | sp P55198 AF17_HUMAN  |
| 7392 | SSDQDSTNKEAEAAGVKPAGVRPR2.20002E+24                | sp Q92625 ANS1A_HUMAN |
| 7393 | LTSVSSSVDFDQR2200000000                            | sp Q5T3F8 CSCL2_HUMAN |
| 7394 | VDSPTVTTLK2000000000                               | sp Q07866 KLC1_HUMAN  |
| 7395 | VVPQQIHTSPR2000                                    | sp Q9H0E3 SP130_HUMAN |
| 7396 | IADPEHDHTGFLTEYVATR20000000                        | sp P27361 MK03_HUMAN  |
| 7397 | THCVGDSQSSASSPPATSK20000000                        | sp Q9H4Z2 ZN335_HUMAN |
| 7398 | HGSGADSDYENTQSGDPLLGLEK3002000000000000            | sp Q9Y2X7 GIT1_HUMAN  |
| 7399 | SKGSLEITESQSADAEPKPPKPDLSR2E+27                    | sp Q9C0B5 ZDHC5_HUMAN |
| 7400 | SFSISPVR2020000                                    | sp P18583 SON_HUMAN   |
| 7401 | NKIEEAPEATPQSPQPGSSPISLSAEENAEGEVS2020000000000200 | sp Q9H4L7 SMRCD_HUMAN |
| 7402 | VDDKPSSPGDSSK20000000                              | sp Q9HC52 CBX8_HUMAN  |
| 7403 | SQSPAASDCSSSSSSASLPSSGR20000000000000              | sp O95817 BAG3_HUMAN  |
| 7404 | LFPEFDDSDYDEVPEEGGAPAR3000000000000000             | sp Q96P48 ARAP1_HUMAN |
| 7405 | GEGDIHENVDLPGSLGQSEEKVPVAPVPSVAPVPSR200000000000   | sp Q9UK76 HN1_HUMAN   |
| 7406 | ASPEPQRENASPAGTTAEAMSR2.000000002E+23              | sp P46379 BAG6_HUMAN  |
| 7407 | TEARSSDEENGPPSSPDLDR20000000022000000              | sp Q96B36 AKTS1_HUMAN |
| 7408 | LGAGGSPEKSPSAQELK200000000                         | sp Q9UNE7 CHIP_HUMAN  |
| 7409 | TEPHSDCSVDLGISK200200000000                        | sp Q96RT1 LAP2_HUMAN  |
| 7410 | RPDYAPMESSDEEDEFQFIKK102200000000000000            | sp P55081 MFAP1_HUMAN |
| 7411 | SVSHGSNHTQKPDEQR200000000                          | sp Q9Y520 PRC2C_HUMAN |
| 7412 | TRDDGDEEGLLTHSEEELEHSQDTDADDGALQ2.020000000002E+21 | sp Q9UKM9 RALY_HUMAN  |
| 7413 | YFDSGDYNMAK200000000                               | sp P56211 ARP19_HUMAN |
| 7414 | VEQMPQASPLAPR100020000000                          | sp O43768 ENSA_HUMAN  |
| 7415 | TVSPGSVSPIHGQGVVENLK2000000000000000               | sp Q8N3F8 MILK1_HUMAN |
| 7416 | FGEYNSNMSPEEK200000                                | sp Q9NZM3 ITSN2_HUMAN |
| 7417 | ESPTQISIGAFPSTK2000000000000000                    | sp P78316 NOP14_HUMAN |
| 7418 | SPSPDGSPAATPEIR202000000000000000                  | sp Q5VWN6 F208B_HUMAN |
| 7419 | VKGGDDHDDTSDSDGLTLK22020000000000                  | sp 000499 BIN1_HUMAN  |
| 7420 | AKPVVSDFDSDEEQDER200000000                         | sp Q9BTC0 DIDO1_HUMAN |
| 7421 | VDKETNTETPAPSPTVVRPK2000002000000000               | sp P51531 SMCA2_HUMAN |
| 7422 | TAVQYIESSDSEIETSELPQK2002000000000000              | sp Q8IX03 KIBRA_HUMAN |
| 7423 | PGPTPSGTNVGSSGRSPSK20020000                        | sp Q14527 HLTF_HUMAN  |
| 7424 | QQLSPSPGQEAGILPETEK200000000000000000              | sp P60468 SC61B_HUMAN |
| 7425 | GSSPGPRPVEGTPASR200000000000000000                 | sp Q17RY0 CPEB4_HUMAN |
| 7426 | DRPVSQPSLVGSK2000000000                            | sp Q13112 CAF1B_HUMAN |
| 7427 | HSSISPVR2020000                                    | sp Q9H4A3 WNK1_HUMAN  |
| 7428 | TTPATGEQSPGAR200000                                | sp Q9NYV4 CDK12_HUMAN |
| 7429 | ACRPPGSPGR20000                                    | sp 000308 WWP2_HUMAN  |
| 7430 | SRPTSFADELAAR2000000000                            | sp O95685 PPR3D_HUMAN |
| 7431 | GGIDNPAITSDQELDDKK20000000000                      | sp Q641Q2 FA21A_HUMAN |
| 7432 | GSVPLSSPPATHFPDETEITNPVVK2.0002E+25                | sp Q5SNT6 FA21B_HUMAN |
| 7433 | DHSPTPSVFNSEER200000200000                         | sp Q9Y4E1 FA21C_HUMAN |
| 7434 | GEGDAPFSEPGTTSTQRPSPETATK200000000                 | sp Q13017 RHG05_HUMAN |
| 7435 | SKPPPTYESEEDK2000000000                            | sp P11388 TOP2A_HUMAN |
|      |                                                    | sp Q6UN15 FIP1_HUMAN  |
|      |                                                    | sp Q9UQ35 SRRM2_HUMAN |
|      |                                                    | sp O60885 BRD4_HUMAN  |

|      |                                               |                       |
|------|-----------------------------------------------|-----------------------|
| 7436 | TSRDTSPSSGSAVSSSK2200000000000                | sp Q8NEY8 PPHLN_HUMAN |
| 7437 | SDSELEVKPAESLLR2000000000000                  | sp Q92539 LPIN2_HUMAN |
| 7438 | TDSREDEISPPPPNPVVK2000002000000000            | sp P10644 KAPO_HUMAN  |
| 7439 | SGPKPFSAPKPKTSPSPKR2020000                    | sp Q01518 CAP1_HUMAN  |
| 7440 | SSGHSSSELSPDAVEK22002200020000000             | sp Q9UQ35 SRRM2_HUMAN |
| 7441 | ILDELDKDDSTHESLSQESESEEDGIHVDSQK2.0200202E+19 | sp Q9H6T3 RPAP3_HUMAN |
| 7442 | SIEDDEEGLICQSGDVL2E+19                        | sp Q9HAZ1 CLK4_HUMAN  |
| 7443 | TVQSPNSSVSPGLAGPVTMTSVHPPIR2.002E+21          | sp O15164 TIF1A_HUMAN |
| 7444 | ASAVSELSR2002002000                           | sp Q9Y2W1 TR150_HUMAN |
| 7445 | LGLQEGSNSSPVDFVNNK20002000000000              | sp Q96R06 SPAG5_HUMAN |
| 7446 | HGSSDISSPR200002000                           | sp Q9BRD0 BUD13_HUMAN |
| 7447 | ILIPSDIESSK20000000                           | sp P30414 NKTR_HUMAN  |
| 7448 | ALEAASLSQHPPSLCISDSEEEEEER200020200000000     | sp O43159 RRP8_HUMAN  |
| 7449 | ITETGAVKPTGECSGEQSPDTNYEPPGEDK2E+29           | sp P49454 CENPF_HUMAN |
|      |                                               | sp P49792 RBP2_HUMAN  |
|      |                                               | sp Q7Z3J3 RGPD4_HUMAN |
|      |                                               | sp A6NKT7 RGPD3_HUMAN |
| 7450 | DSLITPHVSR2000200                             | sp PODJD0 RGPD1_HUMAN |
|      |                                               | sp PODJD1 RGPD2_HUMAN |
|      |                                               | sp O14715 RGPD8_HUMAN |
|      |                                               | sp Q99666 RGPD5_HUMAN |
| 7451 | TSSKESPIPSPTSDRK220000000000020000            | sp Q01082 SPTB2_HUMAN |
| 7452 | HGGSPQLATTPLSQEPVNPSEASPTR2.000002E+25        | sp Q9UQ35 SRRM2_HUMAN |
| 7453 | STAQQELDGKASPPTPVIVASHTANKEEK2E+28            | sp P35606 COPB2_HUMAN |
| 7454 | STSAPQMSPGSSDNQSSSPQAQQK2200000000            | sp Q14157 UBP2L_HUMAN |
| 7455 | AESPESAIESTQSTPQK2000000000000                | sp Q9NTI5 PDS5B_HUMAN |
| 7456 | TSPENVQDR200000000                            | sp P49792 RBP2_HUMAN  |
| 7457 | SSLGQSASETEEDTVSVSK2000200000000000000        | sp Q13435 SF3B2_HUMAN |
| 7458 | ALPSLNTGSSSPR200000                           | sp O14545 TRAD1_HUMAN |
| 7459 | TSSSETEEKKEKPLILQSLGPK2.2E+22                 | sp Q9Y5K6 CD2AP_HUMAN |
| 7460 | YSPTSPYSPPTPK20000000002000                   | sp P24928 RPB1_HUMAN  |
| 7461 | ADTSQEICSPR200002000                          | sp P52948 NUP98_HUMAN |
| 7462 | RNSDRSEDGYHSDGDYGEHDYR2.0020003E+20           | sp P52756 RBM5_HUMAN  |
| 7463 | SAASPVVSSMPER2000000000000                    | sp P18583 SON_HUMAN   |
| 7464 | KPSPSEPEPWKPFPAVSPEPR2.0002E+20               | sp Q96JM3 CHAP1_HUMAN |
| 7465 | FDIYDPFHPTDEAYSPPPAPQK200000000000000         | sp Q9H7N4 SFR19_HUMAN |
| 7466 | SSSSLGSGSSRDSISSDSETSEPLSCR2.002E+24          | sp O75164 KDM4A_HUMAN |
| 7467 | GVQVPASPDTVPQPSLR2000000000000                | sp Q92613 JADE3_HUMAN |
| 7468 | ASSARHSESDITSLIEAMDK2.00022002E+20            | sp Q92545 TM131_HUMAN |
| 7469 | SSSVGSSSSYIPSPAVSR223002000000                | sp Q15149 PLEC_HUMAN  |
| 7470 | RQSSGSATNVASTPDNR2020000000000                | sp Q7Z460 CLAP1_HUMAN |
| 7471 | SSLGSHQLPR2000000000                          | sp O95817 BAG3_HUMAN  |
| 7472 | SEPPAELPSLR20000000000                        | sp Q14669 TRIPC_HUMAN |
| 7473 | SNSFSDER200000000                             | sp Q09666 AHNK_HUMAN  |
| 7474 | LEGNSPQGSNQGVK2000000                         | sp P61006 RAB8A_HUMAN |
| 7475 | TGSGSPFAGNSPAR200000000020000                 | sp Q9UPT8 ZC3H4_HUMAN |
| 7476 | DHTVSGDEDYCP2000000000                        | sp Q9UIG0 BAZ1B_HUMAN |
| 7477 | RGSPAPANPGR2000000000                         | sp O75676 KS6A4_HUMAN |
| 7478 | SPSPPTIQSK20200000000                         | sp Q14687 GSE1_HUMAN  |
| 7479 | DRPHASGTDGDESEEDPPEHKPSK2.0200002E+19         | sp Q96RS0 TGS1_HUMAN  |
| 7480 | AYSPEYR200000                                 | sp Q9UDY2 ZO2_HUMAN   |
| 7481 | SSLGQSASETEEDTVSVSK2020000000000              | sp Q13435 SF3B2_HUMAN |
| 7482 | EKPELSEPHLNGPSSDPEAAFLSR2.000000002E+20       | sp Q9H4A3 WNK1_HUMAN  |
| 7483 | IPSEMPSPNFGK102000000                         | sp Q9H2J7 S6A15_HUMAN |

|      |                                                  |                       |
|------|--------------------------------------------------|-----------------------|
| 7484 | SRSGEGEVSGLMR2000000000100                       | sp Q13263 TIF1B_HUMAN |
| 7485 | YESQLSTNEEKVDTDDR200000000000000                 | sp Q13433 S39A6_HUMAN |
| 7486 | SSQPSPTAVPASDSPPTK22000000000000000              | sp Q3KQU3 MA7D1_HUMAN |
| 7487 | SGGGSGGSGGVSLK20000000000000000                  | sp Q9H7N4 SFR19_HUMAN |
| 7488 | SPPLPAVIR2000000000                              | sp Q9Y6X9 MORC2_HUMAN |
| 7489 | TSPADHGGVSGSESGSAVDSVAGEHSVSGR2E+20              | sp Q5T4S7 UBR4_HUMAN  |
| 7490 | SLLSHEFQDETDTTEEETLYSSK20000000000               | sp 075976 CBPD_HUMAN  |
| 7491 | VDSSTNSSPSPQQSESLSPAHTSDFR200000000000           | sp Q9BQE9 BCL7B_HUMAN |
| 7492 | EPVSPMELTGPEDGAASSGAGR2E+19                      | sp 094953 KDM4B_HUMAN |
| 7493 | DDRSDVESSEEDVTCTK200022200000000000              | sp Q8N5B7 CERS5_HUMAN |
| 7494 | YSDTTSDPENEPFDEDQHTQITK2.02202E+23               | sp P60484 PTEN_HUMAN  |
| 7495 | HGLLLPASPV20000                                  | sp Q96E09 F122A_HUMAN |
| 7496 | SSPPLRTPDVLESSGPAVR2.000002E+19                  | sp 075676 KS6A4_HUMAN |
| 7497 | VVDYSQFQESDDADEDYGR200000000000000               | sp Q9H1E3 NUCKS_HUMAN |
| 7498 | MVIQGPSSPQGEAMVTDVLEDQK1.000002000001E+23        | sp Q12888 TP53B_HUMAN |
| 7499 | KSPAQSPNPSTPR2000200002000                       | sp 076021 RL1D1_HUMAN |
| 7500 | RLSGSSEDEEDSGKGEPTAK202200000200000000           | sp Q9BW71 HIRP3_HUMAN |
| 7501 | QFTSSSSIKGSSGLGGSSR22000000000000000             | sp Q04695 K1C17_HUMAN |
| 7502 | VSEEQTPPSPAGAGMSTAMGR200000000010001000          | sp Q16666 IF16_HUMAN  |
|      |                                                  | sp P49792 RBP2_HUMAN  |
|      |                                                  | sp Q7Z3J3 RGPD4_HUMAN |
| 7503 | EDALDDSVSSSSVHASPLASSPV2000200000                | sp 014715 RGPD8_HUMAN |
|      |                                                  | sp Q99666 RGPD5_HUMAN |
|      |                                                  | sp A6NKT7 RGPD3_HUMAN |
| 7504 | KITPPSSPHSLTSTLVSLGHEEALEMAGSK2.2E+25            | sp Q9BY89 K1671_HUMAN |
| 7505 | RPMEEDGEKSPSK1000000020000                       | sp Q12906 ILF3_HUMAN  |
| 7506 | SEPSLEPESFR200200000000                          | sp Q9C0B5 ZDHC5_HUMAN |
| 7507 | GARPPAAGPGDEDEDEEDTAPESALDTSCLK20000000020000    | sp Q27J81 INF2_HUMAN  |
| 7508 | LSSLRASTK200000000                               | sp P62753 RS6_HUMAN   |
| 7509 | SPEAKPLPGK20000000000                            | sp P46087 NOP2_HUMAN  |
| 7510 | ELDDSSSESSDLQLEGSTLR22020000000000000            | sp P29590 PML_HUMAN   |
| 7511 | TAPSSPLTSPSDTR20020000000                        | sp Q8IWB9 TEX2_HUMAN  |
| 7512 | GPSWDPFR2000000                                  | sp P04792 HSPB1_HUMAN |
| 7513 | RPGHGSLTNISR20000000                             | sp Q7Z6B7 SRGP1_HUMAN |
| 7514 | STPFIVPSSPTEQGR200000000                         | sp Q12888 TP53B_HUMAN |
| 7515 | SLTSSLENIFSR200000000                            | sp 060343 TBCD4_HUMAN |
| 7516 | KSSPSTGLDSGNSK20000000000000000                  | sp Q15057 ACAP2_HUMAN |
| 7517 | SPQTPSQMVPLPSANPPGPLK20200000000000000           | sp Q86UU0 BCL9L_HUMAN |
| 7518 | DSALQDTDDSDDDPVLIPGAR2.00000002E+20              | sp Q58WW2 DCAF6_HUMAN |
| 7519 | EISSSPESCPEEIK2020020000000                      | sp Q92889 XPF_HUMAN   |
| 7520 | SPTPPSSAGLGSNSAPPIDSR202000000000                | sp Q8IWX8 CHERP_HUMAN |
| 7521 | RHSHSHSPMSTR202000000                            | sp P62995 TRA2B_HUMAN |
| 7522 | SSLSPSSAYER2002000000000                         | sp Q9BYW2 SETD2_HUMAN |
| 7523 | FRRSETPPHWR202000000                             | sp Q13427 PPIG_HUMAN  |
| 7524 | NDSVIVADQTPPTR20000002020000                     | sp P15336 ATF2_HUMAN  |
| 7525 | ERDHSPTPSVFNSEER20200000000000                   | sp Q6UN15 FIP1_HUMAN  |
| 7526 | KYSISSDNSDTTDSHATSTSASR2.2002E+19                | sp Q9NQC1 JADE2_HUMAN |
| 7527 | ILDELKDDSTHESLSQESESEEDGIHVDSQK2.02002E+19       | sp Q9H6T3 RPAP3_HUMAN |
| 7528 | SLSGSSPCPK20002200000                            | sp Q9UQ35 SRRM2_HUMAN |
| 7529 | LRLSPSPTSQR2002000                               | sp P02545 LMNA_HUMAN  |
| 7530 | VQSSSESTSSPSQHEATPGAR2000000000000               | sp 075152 ZC11A_HUMAN |
| 7531 | SVDFDSLTVR20000000000                            | sp Q9Y5K6 CD2AP_HUMAN |
| 7532 | VESGDPSSLHPPSPGTPSATPASPPASATPSQR200200000000000 | sp Q4KMQ1 TPRN_HUMAN  |
| 7533 | GLPLGSAVSSPVLFPVGR20000200000                    | sp Q8WUM0 NU133_HUMAN |

|      |                                                    |                       |
|------|----------------------------------------------------|-----------------------|
| 7534 | ITPHTSPAPR2002000000                               | sp Q58A45 PAN3_HUMAN  |
| 7535 | VNPHKVPASSVDSNIPSSQGYK200020000000000000           | sp Q9UHB7 AFF4_HUMAN  |
| 7536 | SPLHSSPEK20000                                     | sp Q13459 MYO9B_HUMAN |
| 7537 | APEPDLMSPTR20000                                   | sp Q9H7D0 DOCK5_HUMAN |
| 7538 | LSVQSNPSPQLR200000                                 | sp 075152 ZC11A_HUMAN |
| 7539 | ESAAPASPAPSPAPSPTAPPQK20002000000000               | sp Q3KQU3 MA7D1_HUMAN |
| 7540 | ERSPSPSFR20200000                                  | sp P49585 PCY1A_HUMAN |
| 7541 | SPSTTYLHTPTSEDAAIPSK2. 2E+19                       | sp Q13111 CAF1A_HUMAN |
| 7542 | SATDGNTSTPPTSAK200000000                           | sp Q13620 CUL4B_HUMAN |
| 7543 | SPLHSSPEK220000                                    | sp Q13459 MYO9B_HUMAN |
| 7544 | RTDALTSPPGR20002220000                             | sp P49736 MCM2_HUMAN  |
| 7545 | SPVSSLQIR2000000000                                | sp P55197 AF10_HUMAN  |
| 7546 | EVPWSPSAEK2000000                                  | sp Q5JSZ5 PRC2B_HUMAN |
| 7547 | GAPSSPATGVLSPQ GK200000                            | sp Q5SRE5 NU188_HUMAN |
| 7548 | EASRPPEEPSAPSPTLPAQFK2000000000                    | sp Q9H3P2 NELFA_HUMAN |
| 7549 | SPSFGEDYYGPSR200000000000                          | sp P49761 CLK3_HUMAN  |
| 7550 | NSDRSEDGYHSDGDYGEHDYR2. 002000002E+20              | sp P52756 RBM5_HUMAN  |
| 7551 | AGGPTTPLSPTR200020000                              | sp P20700 LMNB1_HUMAN |
| 7552 | LTPVSPVQHQGATVNNTNK20020000000000000000            | sp Q2KHR2 RFX7_HUMAN  |
| 7553 | NMVDLVNTHHLHSSSDEDDR1. 0000000000002E+20           | sp Q9UPN7 PP6R1_HUMAN |
| 7554 | GTPPLTPSDSPQTR20000000200000                       | sp Q6NZY4 ZCHC8_HUMAN |
| 7555 | KASPEPEGEAAGK200000000000                          | sp Q8IU81 I2BP1_HUMAN |
| 7556 | RRSSPSARPPDVPGQPAAK20200000000000000000            | sp Q96JP5 ZFP91_HUMAN |
| 7557 | QQDLHLESPQRQPEYSPESPR2000000000000000              | sp Q9H6F5 CCD86_HUMAN |
| 7558 | NKQDDDLNCEPLSPHNITPEPVSK20000000000000             | sp Q6VMQ6 MCAF1_HUMAN |
| 7559 | KPVTVSPTTPTSPTGEAS22020000000000                   | sp Q9Y6G9 DC1L1_HUMAN |
| 7560 | YVESDDEKPLDDETVNEDASNENSENDITMQSLPK2E+32           | sp P46100 ATRX_HUMAN  |
| 7561 | TIASDSEEEAGKELSDKK20020000000000000000             | sp Q96ST2 IWS1_HUMAN  |
| 7562 | EDYFEPISPDR20000                                   | sp Q69YN4 VIR_HUMAN   |
| 7563 | EESEESDEDMGFLFD200200010000000                     | sp Q8NHW5 RLAOL_HUMAN |
| 7564 | GSSPTPPCSPVQPSK200000020000000                     | sp P05388 RLAO_HUMAN  |
| 7565 | LSSGDPSTSPSLSQTTPSK20000000000000000000            | sp Q9NUL3 STAU2_HUMAN |
| 7566 | EDEDTPNSPNVDL GK2000200000000                      | sp Q99504 EYA3_HUMAN  |
| 7567 | MSCFSRSPMSPTPLDR2020000000                         | sp P98174 FGD1_HUMAN  |
| 7568 | GPTSSPCEEEGDEGEEDRTSDLR2E+19                       | sp Q9UQ35 SRRM2_HUMAN |
| 7569 | APAPPPPQPPPSPLIPNR20000000                         | sp Q86VM9 ZCH18_HUMAN |
| 7570 | MSQPGSPSPK10000200000                              | sp 075128 COBL_HUMAN  |
| 7571 | LLKPGEEPSEYTD EEDTKDHNKQD20000000000000            | sp Q14839 CHD4_HUMAN  |
| 7572 | GPHHLDNSSPGGSEAR2000000000                         | sp 015173 PGRC2_HUMAN |
| 7573 | TASPPPPPK2000000000                                | sp Q8WWM7 ATX2L_HUMAN |
| 7574 | HLEHAPSPSDVSNAP EVK20000000000                     | sp Q8IYB3 SRRM1_HUMAN |
| 7575 | SKLSPSPSLR20000200000                              | sp Q9Y4C1 KDM3A_HUMAN |
| 7576 | GESAPTLSTSPSPSSPSPTSPSPTLGR20202000000000          | sp Q9Y4C1 KDM3A_HUMAN |
| 7577 | GLFQDEEDSCSDCSYR202002000                          | sp Q9Y4C1 KDM3A_HUMAN |
| 7578 | LSSSSPGATVSPSSSDA EYDKLPDADLAR2. 0000000000002E+28 | sp Q5T200 ZC3HD_HUMAN |
| 7579 | ESVSPEDSEK20000000                                 | sp Q9H330 TM245_HUMAN |
| 7580 | EEATYGVWAERDSDDERPSFGGK200000000000                | sp Q8NEM2 SHCBP_HUMAN |
| 7581 | IQQEQESSGEEDSDLSPEER20000200000000                 | sp Q8NI08 NCOA7_HUMAN |
| 7582 | VSSSSPQSGCPSPTIPAGK200000000                       | sp P35251 RFC1_HUMAN  |
| 7583 | SPPGSGASTPVGPWDQAVQR2. 00000002E+20                | sp Q9UBB9 TFP11_HUMAN |
| 7584 | KLSSSSEPYEDEFNDDQS IKK2. 0000003E+20               | sp Q6NXS1 IPP2M_HUMAN |
| 7585 | LAPVPSPEPQKPAPVSPESVK200000000000000000            | sp P41236 IPP2_HUMAN  |
|      |                                                    | sp Q76L83 ASXL2_HUMAN |
|      |                                                    | sp Q8TE77 SSH3_HUMAN  |
|      |                                                    | sp Q9H4L7 SMRCD_HUMAN |
|      |                                                    | sp Q96JM3 CHAP1_HUMAN |

|      |                                                    |                       |
|------|----------------------------------------------------|-----------------------|
| 7586 | GSGGLFSPSTAHPD GALGQR2. 0000002E+20                | sp Q9C0C2 TB182_HUMAN |
| 7587 | IDENSDKEMEVEESPEK20000000020000                    | sp Q8N3X1 FNBP4_HUMAN |
| 7588 | SCVEEPEPEPEAAEGDGD KKGNAEGSSDEEGK22000000          | sp P51858 HDGF_HUMAN  |
| 7589 | QELGSPEER200000                                    | sp Q92974 ARHG2_HUMAN |
| 7590 | RPESPSEISPIK20020000                               | sp Q7Z5K2 WAPL_HUMAN  |
| 7591 | GNLELRPGGAHPGTCSPSRPGS200000                       | sp Q96SN8 CK5P2_HUMAN |
| 7592 | DTYSDRSGSSPDSEITELK3000002220000000000             | sp P17812 PYRG1_HUMAN |
| 7593 | LLDQCDLSTSR200                                     | sp Q9Y597 KCTD3_HUMAN |
| 7594 | SPIINESR200000000                                  | sp Q13523 PRP4B_HUMAN |
| 7595 | TSPSSPAPLPHQEATPR2000000000000000000               | sp P04920 B3A2_HUMAN  |
| 7596 | KVEEDLKADEPSSEESDLEIDK20000000                     | sp P50502 F10A1_HUMAN |
| 7597 | ATISDEEIER20000000                                 | sp Q9UQN3 CHM2B_HUMAN |
| 7598 | KPTPFSSR2000200                                    | sp Q8NEV8 EXPH5_HUMAN |
| 7599 | KPALPVSPAAR200000                                  | sp Q9BWU0 NADAP_HUMAN |
| 7600 | YSSDPTGALTEDSIDD TFLPVPEYINQSVPK2E+29              | sp P00533 EGFR_HUMAN  |
| 7601 | SSSPVTELASR22000000200                             | sp Q9UQ35 SRRM2_HUMAN |
| 7602 | SSIETKPDASQLPK2000000                              | sp Q3KR37 GRM1B_HUMAN |
| 7603 | SQDATFSPGSEQAEK2002000000                          | sp Q86WB0 NIPA_HUMAN  |
| 7604 | RKSEDGTPAEDGTPAATGGSQPPSMGR2E+21                   | sp Q9BQG0 MBB1A_HUMAN |
| 7605 | LVTSGAESGNLNTSPSSNQTR200000000                     | sp Q8NHV4 NEDD1_HUMAN |
| 7606 | REPGSGTESDTSPDFHNQENEPSQEDPEDLDGSVQGVKPK2. 022E+33 | sp Q9HAF1 EAF6_HUMAN  |
| 7607 | TSSKESSIPSP TSDRK2220000000000000000               | sp Q01082 SPTB2_HUMAN |
| 7608 | ASSLNFLNK20000000                                  | sp Q9H0B6 KLC2_HUMAN  |
| 7609 | HSGGFLSSPADFSQENK20000000000                       | sp Q7LBC6 KDM3B_HUMAN |
| 7610 | RNSSDSAIDNPKPNK20000000000                         | sp P46100 ATRX_HUMAN  |
| 7611 | SESFSEDLIPSR200000000000000                        | sp Q9P219 DAPLE_HUMAN |
| 7612 | SPTMEQAVQTASAHLPAPAAVGR1. 000002E+20               | sp Q8ND56 LS14A_HUMAN |
| 7613 | YDERPGSP LPHR2000000                               | sp P08621 RU17_HUMAN  |
| 7614 | VSVSPGR2020000                                     | sp Q8IYB3 SRRM1_HUMAN |
| 7615 | TQDPSSPGTTPPQAR200020000000                        | sp Q13112 CAF1B_HUMAN |
| 7616 | SVASSQPAKPTK2000000000                             | sp Q07157 ZO1_HUMAN   |
| 7617 | IGEGTYGVVYK23000000                                | sp P06493 CDK1_HUMAN  |
|      |                                                    | sp Q00526 CDK3_HUMAN  |
|      |                                                    | sp P24941 CDK2_HUMAN  |
| 7618 | LDNTPASPPRSPAEPNDIPIAK2. 002E+19                   | sp O95359 TACC2_HUMAN |
| 7619 | TPSSSPITPPASETK22000200000000                      | sp Q9NZJ0 DTL_HUMAN   |
| 7620 | KDDSHAEDSEDEKEDHK20002000000000                    | sp Q9H1E3 NUCKS_HUMAN |
| 7621 | TQDPSSPGTTPPQAR20002000000                         | sp Q13112 CAF1B_HUMAN |
| 7622 | ASSPAESSPEDSGYMR2000002000000000                   | sp Q9Y4H2 IRS2_HUMAN  |
| 7623 | KVLSDESEDEEK202000000                              | sp Q8WWQ0 PHIP_HUMAN  |
| 7624 | GILAADESTGSI AK20000                               | sp ALDOA_RABIT        |
|      |                                                    | sp P04075 ALDOA_HUMAN |
| 7625 | HKSDSPESDAER200200000                              | sp O75400 PR40A_HUMAN |
| 7626 | GTAGKSPDLSSQK200000000                             | sp Q9Y2I7 FYV1_HUMAN  |
| 7627 | GLQLTPGIGGMQHHFFDDED R2000001000000000000          | sp P12270 TPR_HUMAN   |
| 7628 | ALSSLHGDDQDSEDEVLTIPEVK2. 2E+21                    | sp P11717 MPRI_HUMAN  |
| 7629 | SPGSTPTTSSQAPQK200000000                           | sp P35658 NU214_HUMAN |
| 7630 | ALSSAVQASPTSPGGSPSSSGQR2200020000000000            | sp Q03164 KMT2A_HUMAN |
| 7631 | SHSGTSPDNTAPPPPPRPQPSHSR2E+25                      | sp Q96D71 REPS1_HUMAN |
| 7632 | RRTASPPPPPK2020000000                              | sp Q8IYB3 SRRM1_HUMAN |
| 7633 | SRSPPPVSK20000000                                  | sp Q01130 SRSF2_HUMAN |
| 7634 | SNSTSSMSSGLPEQDR2000000000000000                   | sp P42684 ABL2_HUMAN  |
| 7635 | NSSDSAIDNPKPNKLPK2020000000000000                  | sp P46100 ATRX_HUMAN  |
| 7636 | ASPPDPK2000000                                     | sp Q7L590 MCM10_HUMAN |



|      |                                               |                       |
|------|-----------------------------------------------|-----------------------|
| 7637 | QILIIACSPVSSVR20002000                        | sp Q5QJE6 TDIF2_HUMAN |
| 7638 | SPAKSPNPSTPR2000200002000                     | sp O76021 RL1D1_HUMAN |
| 7639 | DIDISSPEFK200000                              | sp Q09666 AHNK_HUMAN  |
| 7640 | CAAPRPPSSPEQR20000000                         | sp Q5H9R7 PP6R3_HUMAN |
| 7641 | VIKDEALSDGDDLRFPSDLK2000000000000000          | sp Q01831 XPC_HUMAN   |
| 7642 | ALSGTSPDDVQPGPSVGPSSK2E+19                    | sp Q9Y314 NOSIP_HUMAN |
| 7643 | GVDEQSDSSESESEEEKPPEEDKEEEEEK2.022002E+23     | sp P35269 T2FA_HUMAN  |
| 7644 | RSPSPSPTPEAK200000200000                      | sp Q8TAQ2 SMRC2_HUMAN |
| 7645 | TLSSSSMDLSR2000000000                         | sp Q9H0B6 KLC2_HUMAN  |
| 7646 | SRTPPAIR202000000                             | sp Q9UQ35 SRRM2_HUMAN |
| 7647 | MAGNEALSPTSPFR20020000                        | sp Q86WR7 PRSR2_HUMAN |
| 7648 | YSQDDDDGSSSSGSSVAGSQSTLFLK200000000000        | sp Q9UH99 SUN2_HUMAN  |
| 7649 | SPPYTAFLGNLPYDVTEESIK2E+21                    | sp P23588 IF4B_HUMAN  |
| 7650 | DPTQKPSPHVKPLSAAPVEGSPDR20000                 | sp Q9BXF6 RFIP5_HUMAN |
| 7651 | SKSPPKSPEEEGAVSS202000200000000000            | sp Q01130 SRSF2_HUMAN |
| 7652 | VDSSTNSSPSPQQSELSAHTSDFR200000000000000000    | sp Q9BQE9 BCL7B_HUMAN |
| 7653 | FDHESSPGTDEDK2000200000                       | sp Q13427 PIIG_HUMAN  |
| 7654 | TNLTQSSTTNLPGSPGSPGSPGSPGSPGVK2.002002002E+19 | sp Q6IN85 P4R3A_HUMAN |
| 7655 | YRSPEPDPYLSYR200000000000                     | sp P49761 CLK3_HUMAN  |
| 7656 | KPVTVSPTTPTSPTEGEAS2000000                    | sp Q9Y6G9 DC1L1_HUMAN |
| 7657 | EKPELSEPSHLNPGSSDPEAAFLSR200000000000         | sp Q9H4A3 WNK1_HUMAN  |
| 7658 | SPSPSFR20200000                               | sp P49585 PCY1A_HUMAN |
| 7659 | SPAGSPELR2000200000                           | sp Q96JM3 CHAP1_HUMAN |
| 7660 | ARHSDPDSPPR200020000                          | sp Q9BRD0 BUD13_HUMAN |
| 7661 | RSPGEMR2000000                                | sp Q6NYC8 PPR18_HUMAN |
| 7662 | SSPGAVAGLSNAPGTPR2000                         | sp Q9BWG4 SSBP4_HUMAN |
| 7663 | DSAYQSITHYRVPVSR200                           | sp P50402 EMD_HUMAN   |
| 7664 | LNQPGTPTR200                                  | sp P36507 MP2K2_HUMAN |
| 7665 | RRPSGSEQSDNESVQSGR2020020002002000            | sp Q6PD62 CTR9_HUMAN  |
| 7666 | GSQPPPAESQSSLRR20000                          | sp O43491 E41L2_HUMAN |
| 7667 | LTEGCSFR2000                                  | sp Q71UM5 RS27L_HUMAN |
| 7668 | ETAVPGPLGIEDISPNSPDDK200000                   | sp P42677 RS27_HUMAN  |
| 7669 | LMLSTSEYSQSPK2000                             | sp Q12888 TP53B_HUMAN |
| 7670 | SRTPPSAPSQR20000000000000                     | sp Q12888 TP53B_HUMAN |
| 7671 | IAAPELHKGSDSEDEPTK200000000000                | sp Q9UQ35 SRRM2_HUMAN |
| 7672 | ALEQQEAESDSDTEEKDDDDDEEDVGKR2.02E+19          | sp Q92733 PRCC_HUMAN  |
| 7673 | RLSPSSAASSYSFSDLNSTR200200000000000000        | sp Q9BXY0 MAK16_HUMAN |
| 7674 | VALSDDETKETENMR2000000000100                  | sp P50402 EMD_HUMAN   |
| 7675 | NSTGSGHSAQELPTIR2000000000000000              | sp Q15054 DPOD3_HUMAN |
| 7676 | GSGSPHSLSQK2000000000                         | sp O94763 RMP_HUMAN   |
| 7677 | GRLSVASTPISR20020002000                       | sp Q9BSJ6 FA64A_HUMAN |
| 7678 | TRLSPPR20000                                  | sp Q9BXS6 NUSAP_HUMAN |
| 7679 | DEILPTPISEQK2000000000                        | sp Q96PK6 RBM14_HUMAN |
| 7680 | HYEDGYPGSDNYGSLSR20000                        | sp P23396 RS3_HUMAN   |
| 7681 | SPQLATPGSSHPGEEECR20000000000000000000        | sp O60716 CTND1_HUMAN |
| 7682 | LEPQELSPLSATVFPK20000000000                   | sp Q9C0A6 SETD5_HUMAN |
| 7683 | TTHLAGALSPGEAWPFESV200000000000               | sp Q3T8J9 GON4L_HUMAN |
| 7684 | NMVDLVNTHHLHSSSDEDDRK200000000000             | sp Q9H869 YYAP1_HUMAN |
| 7685 | EYIPGQPPLSQSSDSSPTR20020000                   | sp Q9Y3X0 CCDC9_HUMAN |
| 7686 | GGPGAAPGGASPASSSSAASSPSSGR2000000000000000    | sp Q9UPN7 PP6R1_HUMAN |
| 7687 | LDSSEMDSHENEDYTMSSPLPGK2.00002E+20            | sp P07814 SYEP_HUMAN  |
| 7688 | TPTHQPPKPGSPGRPACPLSNLLLSYEER2E+20            | sp Q9BXX1 KLF16_HUMAN |
|      |                                               | sp Q9NTI5 PDS5B_HUMAN |
|      |                                               | sp Q96F63 CCD97_HUMAN |

|      |                                                                                                   |                       |
|------|---------------------------------------------------------------------------------------------------|-----------------------|
| 7689 | RGEGDAPFSEPGTTSTQRPSSPETATK2. 0002E+19                                                            | sp Q9UQ35 SRRM2_HUMAN |
| 7690 | PGTPSGTNVGSGRSPSK20000                                                                            | sp P60468 SC61B_HUMAN |
| 7691 | NSQKHSPTSEPTPPGDALPPVSSPHTHR200000000020000000                                                    | sp Q9H6S3 ES8L2_HUMAN |
| 7692 | DINTFLGTPVQK200000                                                                                | sp P46013 KI67_HUMAN  |
| 7693 | RPGNSTVTSSPPVTPK2000002000                                                                        | sp Q7Z2Z1 TICRR_HUMAN |
| 7694 | QGSGRESPLASR200000                                                                                | sp Q8WWM7 ATX2L_HUMAN |
| 7695 | VVELRPPSR200                                                                                      | sp Q9P1Y6 PHRF1_HUMAN |
| 7696 | I IPTLEGLQLPSPTATSQ LPLESDAVECLNYQH YK2E+22                                                       | sp P61978 HNRPK_HUMAN |
| 7697 | DQTASAPATPLV NK20200000000000                                                                     | sp Q53SF7 COBL1_HUMAN |
| 7698 | TLSNAEDYLDDESD20000000000000                                                                      | sp Q92882 OSTF1_HUMAN |
| 7699 | KHSPSPPTPTESR200000000000                                                                         | sp Q92922 SMRC1_HUMAN |
| 7700 | QSSTPSAPELGQQPDVNI SEWK2E+19                                                                      | sp Q93100 KPBB_HUMAN  |
| 7701 | SSPSARPPDVP GQQPQAAK20000000000000000000                                                          | sp Q96JP5 ZFP91_HUMAN |
| 7702 | SSLAETLDSTGSLDPQR2002000000                                                                       | sp Q9UGH3 S23A2_HUMAN |
| 7703 | VAAQSPSPASAEALLPALPLR20020000000000000000                                                         | sp Q9Y4F5 C170B_HUMAN |
| 7704 | AGTATSPAGSSPAVAGGTQRPAEDSSSSEESDSEEEK2E+35                                                        | sp Q13428 TCOF_HUMAN  |
| 7705 | LLSTDAEAVSTR2000000000                                                                            | sp Q15545 TAF7_HUMAN  |
| 7706 | RHSSETFSSTTTVTPVSPFAHNPK2. 2E+23                                                                  | sp Q9Y4H2 IRS2_HUMAN  |
| 7707 | SLGNILQAKPTSSPAK20000                                                                             | sp Q13428 TCOF_HUMAN  |
| 7708 | LSSLSSQTEPTSAGDQYDCSR2E+19                                                                        | sp Q9BY89 KI671_HUMAN |
| 7709 | RVSLEPHQPGTPESK200000000200000                                                                    | sp Q14980 NUMA1_HUMAN |
|      |                                                                                                   | sp P05534 1A24_HUMAN  |
|      |                                                                                                   | sp P30447 1A23_HUMAN  |
| 7710 | GGSYSQAASSDSAQGS DVSLTACK3. 000000000002E+21                                                      | sp P01891 1A68_HUMAN  |
|      |                                                                                                   | sp P01892 1A02_HUMAN  |
|      |                                                                                                   | sp Q09160 1A80_HUMAN  |
|      |                                                                                                   | sp P10316 1A69_HUMAN  |
| 7711 | APLVP P P P P P P P P P P P P L P D P T P P E P E E E I L G S D D E E Q E D P A D Y C K 2 E + 2 5 | sp P78362 SRPK2_HUMAN |
| 7712 | SLGSSPCPK2200000                                                                                  | sp Q9UQ35 SRRM2_HUMAN |
| 7713 | SLGSASPGPGQPPLSSPTR20000                                                                          | sp Q9C0B5 ZDHC5_HUMAN |
| 7714 | DTPRPDHPHDGHSPASR200000                                                                           | sp Q9C0J8 WDR33_HUMAN |
| 7715 | EEEEGISQESSEEEQ2200000                                                                            | sp P17096 HMGA1_HUMAN |
| 7716 | RSSKSFSLDEPPLFIPDNIATIR2. 02E+19                                                                  | sp Q92576 PHF3_HUMAN  |
| 7717 | GKSSEPVVIMK2000000100                                                                             | sp P46013 KI67_HUMAN  |
| 7718 | KKTVSASESEDR20202000000                                                                           | sp Q9ULG6 CCPG1_HUMAN |
| 7719 | YSPTSPTYSPTSPVYTPTSPK2. 0000000000003E+20                                                         | sp P24928 RPB1_HUMAN  |
| 7720 | AEPKPEVVDSTESIPVSDSDAMVDDPNDEDFV PFRPR2. 0002E+23                                                 | sp Q14202 ZMYM3_HUMAN |
| 7721 | GTPSQSPVVGR200000000                                                                              | sp P52594 AGFG1_HUMAN |
| 7722 | SPEHSAEPIR20000000000                                                                             | sp Q9ULH0 KDIS_HUMAN  |
| 7723 | KHSEEAFTPPLK20000000000                                                                           | sp Q3B726 RPA43_HUMAN |
| 7724 | RHSTSSLSPQR22000000                                                                               | sp Q03164 KMT2A_HUMAN |
| 7725 | LVDVSPDRGSPSR20000000200                                                                          | sp Q9NYZ3 GTSE1_HUMAN |
| 7726 | NTSSDNSDEVMPAQSPR20002000010000000                                                                | sp Q9HCK8 CHD8_HUMAN  |
| 7727 | KL GAGEGGEASVSPEK20000                                                                            | sp Q13428 TCOF_HUMAN  |
| 7728 | TFSFSDDENKPPSPK20200000000000                                                                     | sp Q9UHJ3 SMBT1_HUMAN |
| 7729 | KASSPSPLTIGTPESQR2002000000000000                                                                 | sp Q9NPI6 DCP1A_HUMAN |
| 7730 | EEDEENDNDNESDHDEADS200000000                                                                      | sp Q9NRG0 CHRC1_HUMAN |
| 7731 | VPSVESLFR20000000                                                                                 | sp Q13439 GOGA4_HUMAN |
| 7732 | SSGSLGHRPSQEMDK2000000000000                                                                      | sp Q5SW79 CE170_HUMAN |
| 7733 | VLSSTSEDEPGVVK22220000000000                                                                      | sp Q8NI08 NCOA7_HUMAN |
| 7734 | CPVKQDSVESQLK20000000                                                                             | sp Q5T8I3 F102B_HUMAN |
| 7735 | RASPSKPASAPASR20000000000                                                                         | sp P27816 MAP4_HUMAN  |
| 7736 | EGEETEGSEEDDKENDKTEEMPNDVLENK2E+26                                                                | sp P49321 NASP_HUMAN  |
| 7737 | SPISELHSAPLTPVAR200200000000200000                                                                | sp Q7Z3B3 KANL1_HUMAN |

|      |                                                     |                        |
|------|-----------------------------------------------------|------------------------|
| 7738 | SPGPPALK200000000                                   | sp Q8IU81 I2BP1_HUMAN  |
| 7739 | SPSMVPSPGWVASPK200002000000000                      | sp Q86UU0 BCL9L_HUMAN  |
| 7740 | KRSESPPAELPSLR2020000000000                         | sp Q14669 TRIPC_HUMAN  |
| 7741 | GYQSLSDSPPGSR2000000                                | sp Q9NPR2 SEM4B_HUMAN  |
| 7742 | SLKESEQESEEEILAQKK200020000000000                   | sp Q9BW71 HIRP3_HUMAN  |
| 7743 | LINSELGSPSR20000                                    | sp Q68CP4 HGNAT_HUMAN  |
| 7744 | HTPNTSDNEGSDTEVCGPNSPSK20200000000000               | sp Q8NEN9 PDZD8_HUMAN  |
| 7745 | SPTPALCDPPACSLPVASQPPQHLSEAGR2E+29                  | sp Q9P2R6 RERE_HUMAN   |
| 7746 | LAGGQTSQPTTPLTSPQR20000                             | sp Q095155 UBE4B_HUMAN |
| 7747 | GRLTPSPDIIVLSDNEASSPR20200000000000020000           | sp Q8WXI9 P66B_HUMAN   |
| 7748 | HHHHDSDSNSPCK2000200000                             | sp Q9BU76 MMTA2_HUMAN  |
| 7749 | SQSFHQPSR2000000000                                 | sp Q8WVR3 CGO43_HUMAN  |
| 7750 | TPLSSLSATSNNSTVACIDR200000000000000000              | sp P00533 EGFR_HUMAN   |
| 7751 | TLSSPSNRPSGETSVPPPPAVGR2E+20                        | sp Q8WWM7 ATX2L_HUMAN  |
| 7752 | RSSLLNAK2000000                                     | sp Q8TEU7 RPGF6_HUMAN  |
| 7753 | SKTPSSPCPASK2000020000000                           | sp Q9NQS7 INCE_HUMAN   |
| 7754 | SGPKPFSAPKQTSPPSK200000                             | sp Q01518 CAP1_HUMAN   |
| 7755 | SRTSPVTR200000                                      | sp Q9UQ35 SRRM2_HUMAN  |
| 7756 | SRSPSPELNK20200000000                               | sp Q9UQ35 SRRM2_HUMAN  |
| 7757 | SRSPLELEPEAK2020000000000                           | sp Q92466 DDB2_HUMAN   |
| 7758 | SSRSVEDDKEGHLVCR20200000000000000                   | sp P49761 CLK3_HUMAN   |
| 7759 | SHSGTSPDNTAPPPPPRPQPSHSR2. 2E+21                    | sp Q96D71 REPS1_HUMAN  |
| 7760 | RASSPFR220000                                       | sp Q14978 NOLC1_HUMAN  |
| 7761 | SGSDAGEARPTPASPR2000000000000000000                 | sp Q96FS4 SIPA1_HUMAN  |
| 7762 | SPGSQAPDEGAGGALR200000000000000000                  | sp P10075 GLI4_HUMAN   |
| 7763 | GHHVTDSENDEPLNLNASDSESEELHR2. 0000000000202E+21     | sp Q96ST2 IWS1_HUMAN   |
| 7764 | LLDESESAASSR200                                     | sp Q8N108 MIER1_HUMAN  |
| 7765 | WDQTADQTPGATPK20002000                              | sp Q075533 SF3B1_HUMAN |
| 7766 | RGEGDAPFSEPQTSTQRPSSPETATK2E+19                     | sp Q9UQ35 SRRM2_HUMAN  |
| 7767 | SPENSPPVKPK200000000000                             | sp Q8TF72 SHRM3_HUMAN  |
| 7768 | RPAEPGGPQEPGLASSPPGR200000                          | sp Q9BZC7 ABCA2_HUMAN  |
| 7769 | ALPQTPRPR200000                                     | sp Q9UQ35 SRRM2_HUMAN  |
| 7770 | LSTPAHSPVLK2000200000                               | sp Q8IY63 AMOL1_HUMAN  |
| 7771 | GGSGSHNWGTVK20000000000                             | sp Q8NC51 PAIRB_HUMAN  |
| 7772 | VVVSPK20000                                         | sp P19338 NUCL_HUMAN   |
| 7773 | RYSPPPKR3002000000                                  | sp Q8IYB3 SRRM1_HUMAN  |
| 7774 | EPLENSASESDTELPEK20202200000000                     | sp P78337 PITX1_HUMAN  |
| 7775 | GSPSPEKPDVEK200000000000                            | sp Q93074 MED12_HUMAN  |
| 7776 | TVCGSPLAAQSPSAELQAAPPPPGSPSLPGR2. 0000000000002E+20 | sp Q969V6 MKL1_HUMAN   |
| 7777 | TEMKSPFNPSPQDSR10000002020000000                    | sp P08651 NFIC_HUMAN   |
| 7778 | TPTPSTPGDTQNTAPVPPAEDGIK2. 0200000000002E+26        | sp Q14839 CHD4_HUMAN   |
| 7779 | FTMDLSDDEDFSDFEKTDDEDFVPSDASPPK2. 00002000002E+26   | sp P11388 TOP2A_HUMAN  |
| 7780 | RPMSSPEMK200000                                     | sp P51610 HCFC1_HUMAN  |
| 7781 | SQDATFSPGSEQAESKSPGPIVSR2. 02002E+19                | sp Q86WB0 NIPA_HUMAN   |
| 7782 | LPSANQGSFPK20000                                    | sp Q56NI9 ESCO2_HUMAN  |
| 7783 | VTSSVPLPSGSTSSPGR20000000                           | sp Q15036 SNX17_HUMAN  |
| 7784 | SPHQLLSPSSFSPSATPSQK202200000000000                 | sp Q14181 DPOA2_HUMAN  |
| 7785 | GAAPTPPGK200000                                     | sp Q13428 TCOF_HUMAN   |
| 7786 | SVASSQPAKPTK200                                     | sp Q07157 ZO1_HUMAN    |
| 7787 | AQTPPISSLPTSPSDEVGR200000002000000000               | sp Q15751 HERC1_HUMAN  |
| 7788 | KRNSISDDDTSEDEL202000202000000                      | sp Q76FK4 NOL8_HUMAN   |
| 7789 | RGSPASPTR200020000                                  | sp Q6P5Z2 PKN3_HUMAN   |
| 7790 | ALLQSSASR20000                                      | sp Q9UQ80 PA2G4_HUMAN  |

|      |                                                    |                       |
|------|----------------------------------------------------|-----------------------|
| 7791 | KAPSASDSKADSDGAKPEPVAMAR2. 0202000002E+23          | sp Q7Z4V5 HDGR2_HUMAN |
| 7792 | SRTPPVTR200000000                                  | sp Q9UQ35 SRRM2_HUMAN |
| 7793 | YHGHSMSDPGVSYR21000000000                          | sp P08559 ODPA_HUMAN  |
| 7794 | STSTPTSPGPR2000200000                              | sp P29803 ODPAT_HUMAN |
| 7795 | TDALTSSPGR2200000                                  | sp Q8WWM7 ATX2L_HUMAN |
| 7796 | VEQMPQASPLAPR200000000                             | sp P49736 MCM2_HUMAN  |
| 7797 | TPTPSTPGDTQPNTAPVPPAEDGIK2. 0002E+21               | sp Q8N3F8 MILK1_HUMAN |
| 7798 | RRSPSPPTR202000000                                 | sp Q14839 CHD4_HUMAN  |
| 7799 | SPSESSPQHPTTPARPR20000020000000000000              | sp Q8IYB3 SRRM1_HUMAN |
| 7800 | KKSSSEAKPTSLGLAGGHK220000000000000000              | sp O14733 MP2K7_HUMAN |
| 7801 | SPTAQSPTPSVEADSPDK2E+19                            | sp Q96RK0 CIC_HUMAN   |
| 7802 | SDDSSTLPR200000000                                 | sp Q96HH9 GRAM3_HUMAN |
| 7803 | ISAPNVDFNLEGPK200000000000000                      | sp Q9ULE0 WWC3_HUMAN  |
| 7804 | APQQPPPPQPPPPQPPPPQPPPPPSYSPAR2000000              | sp Q09666 AHNK_HUMAN  |
| 7805 | MSDSESEELPKPQVSDSESEEPPI. 20202E+24                | sp Q9BUJ2 HNRL1_HUMAN |
| 7806 | AAPPPPPPPPLESSPR20000                              | sp Q96ST2 IWS1_HUMAN  |
| 7807 | ALSKPGTAAELR200000000000                           | sp Q5T4S7 UBR4_HUMAN  |
| 7808 | AGGGPTLQCPPSSPEK20000                              | sp Q9BZ29 DOCK9_HUMAN |
| 7809 | RESISPQADSACSSPAPSTGK2. 02000002E+20               | sp Q96N66 MBOA7_HUMAN |
| 7810 | EDTDHEEKASNEVTK200000020000000                     | sp Q9GZR1 SENP6_HUMAN |
| 7811 | LASVPAGGAVAVSAAPGSAAPAAGSAPAAAEK200000000000000000 | sp O75475 PSIP1_HUMAN |
| 7812 | LGSYSGPTSVSR200000000000                           | sp P05387 RLA2_HUMAN  |
| 7813 | RNSNSPPSPSSMNQR200002000000000                     | sp Q9BZ23 PANK2_HUMAN |
| 7814 | MSQPGSPSPK2000200000                               | sp Q7Z5L9 I2BP2_HUMAN |
| 7815 | TAASVLNFIKESPK20000                                | sp Q14839 CHD4_HUMAN  |
| 7816 | SDLSSSSGSLSLSHGSSSLEHR200000000000000000           | sp Q6N021 TET2_HUMAN  |
| 7817 | QISSSTGCLSSPNATVQSPK220000000000000000             | sp O15013 ARHGA_HUMAN |
| 7818 | SVSSYGNIR2002000000                                | sp Q9Y6Y0 NS1BP_HUMAN |
| 7819 | ITEVSCKSPQDPVKPTSSK200000002000000                 | sp Q8N122 RPTOR_HUMAN |
| 7820 | SPSDSSTASTPVAEQIER200000000000000                  | sp P46013 KI67_HUMAN  |
| 7821 | SRSHSPMSNR20202000000                              | sp Q16643 DREB_HUMAN  |
| 7822 | IRHSSDTSPPR220020000                               | sp Q13595 TRA2A_HUMAN |
| 7823 | SGAQASSTPLSPTR200000000                            | sp Q9BRD0 BUD13_HUMAN |
| 7824 | ILLDAQHESGQSSSR200                                 | sp P02545 LMNA_HUMAN  |
| 7825 | DDDSLPAETGNHPFFR2000000000000000                   | sp O60238 BNI3L_HUMAN |
| 7826 | KPLTTSGFHHSEEGTSSSGSK200000                        | sp O95071 UBR5_HUMAN  |
| 7827 | RRSPSLSSK200000000                                 | sp Q5SW79 CE170_HUMAN |
| 7828 | SPMSTNSSVHTGSDVEQDAEK2. 010000000002E+21           | sp Q8IYB3 SRRM1_HUMAN |
| 7829 | ASTTSLSGDSETEGK20202000000                         | sp Q9ULU4 PKCB1_HUMAN |
| 7830 | RSSLSPSSAYER202000000000                           | sp Q8N1G2 CMTR1_HUMAN |
| 7831 | IGPLGLSPK2000                                      | sp Q9BYW2 SETD2_HUMAN |
| 7832 | AGGKPSQSPSQEAAGEAVLGAK200000000000000000           | sp P30050 RL12_HUMAN  |
| 7833 | SAASPVSSMPERASESSSEEKDDYEIFVK220000000000000       | sp P00519 ABL1_HUMAN  |
| 7834 | ASPSPPK20200000                                    | sp P18583 SON_HUMAN   |
| 7835 | SPSPSPAAVNHSSSDISPVSNSTSSSPGK220000000             | sp Q8IYB3 SRRM1_HUMAN |
| 7836 | SSPVNNHSPGQTPTLGQPEAR2. 2E+22                      | sp O75381 PEX14_HUMAN |
| 7837 | GTEPSPGGTPQSRPVSPAGPPEGVPEEAQPPR2. 00020002E+25    | sp Q5SW79 CE170_HUMAN |
| 7838 | SVSSPTSNTPTTK202000000000000000                    | sp Q96L14 C170L_HUMAN |
| 7839 | GPTSSPCEEEDGEDRTSDLR2. 00000000000002E+19          | sp Q8WUZO BCL7C_HUMAN |
| 7840 | SRVSVSPGR2000000                                   | sp Q5M775 CYTSB_HUMAN |
| 7841 | YSDGDKSDDLVVDVSNEDPATPR200000000000000000          | sp Q86VM9 ZCH18_HUMAN |
| 7842 | SAGGSSPEGGEDSDREDGNYCPPVK2. 20000002E+21           | sp Q8IYB3 SRRM1_HUMAN |
|      |                                                    | sp Q04726 TLE3_HUMAN  |
|      |                                                    | sp Q9H6Z4 RANB3_HUMAN |

|      |                                              |                       |
|------|----------------------------------------------|-----------------------|
| 7843 | LLHNSEDEQSLK200002000                        | sp Q9NSI6 BRWD1_HUMAN |
| 7844 | YHGHSMSDPGVSYR20000000000                    | sp P08559 ODPA_HUMAN  |
| 7845 | RGSSAAASPGSPPPGR200002000000000              | sp P29803 ODPAT_HUMAN |
| 7846 | MISTPSPK202000                               | sp Q86UX6 ST32C_HUMAN |
| 7847 | HASSPESPAPAPGSHR222000000000002000           | sp Q53F19 CQ085_HUMAN |
| 7848 | QESCPHHPQVLAQQGSGSSPK2.02E+20                | sp Q9UQ35 SRRM2_HUMAN |
| 7849 | SSPSGITHVIASNAR2000000000000                 | sp Q8N1G0 ZN687_HUMAN |
| 7850 | STSAPQMSPGSSDNQSSSPQPAQQK2002200000000000000 | sp Q9BQI6 ANR32_HUMAN |
| 7851 | SMGGAIIAPPTSLVEK20000000000000000            | sp Q14157 UBP2L_HUMAN |
| 7852 | TAAELLSQGSQAGGSQTLK2000                      | sp Q96I25 SPF45_HUMAN |
| 7853 | SKSPPKSPEEEGAVSS200020000000020              | sp Q14141 SEPT6_HUMAN |
| 7854 | TPDGNKSPAPKPSDLRPGDVSSK2.000002E+23          | sp Q01130 SRSF2_HUMAN |
| 7855 | ASETPPPVAQPKPEAPHPGLETTLQER2E+24             | sp Q05682 CALD1_HUMAN |
| 7856 | LEGSDDLLEDSDSEEHSR200000200                  | sp Q6P1N0 C2D1A_HUMAN |
| 7857 | LNSPEETAFTPK200000002000                     | sp Q9NR09 BIRC6_HUMAN |
| 7858 | NPPPQDYESDDSYEVLDTLEYAR3000000000000         | sp Q9BTX1 NDC1_HUMAN  |
| 7859 | GPSPPASPTR200020000                          | sp Q8IVP5 FUND1_HUMAN |
| 7860 | HFSEHPSTSK200000200                          | sp Q6P5Z2 PKN3_HUMAN  |
| 7861 | KPSDSLVAASSR200020022000                     | sp O43719 HTSF1_HUMAN |
| 7862 | SRTASGSSVTSLDGTR202020000000000              | sp Q5T0W9 FA83B_HUMAN |
| 7863 | TDSDDLQLYK20000000                           | sp Q92597 NDRG1_HUMAN |
| 7864 | SSPVNRPSSATNK2000000000000                   | sp Q01433 AMPD2_HUMAN |
| 7865 | MSPNETLFLESTNK2000                           | sp Q96L91 EP400_HUMAN |
| 7866 | RGSSSSPEHSASSDSTK220000000000000             | sp Q9HB90 RRAGC_HUMAN |
| 7867 | YGGVGSQPPVPEPVPSSPSQEPPTK2000000000          | sp Q9NQL2 RRAGD_HUMAN |
| 7868 | SPASCHEPMADDPSK2000000000000                 | sp Q9P275 UBP36_HUMAN |
| 7869 | LPSSSGLPAADVSPATAEPLSPSTPTR20000000          | sp Q04323 UBXN1_HUMAN |
| 7870 | SASPHVDLCLVSPCEFEHR2.020000000002E+20        | sp Q9BXB5 OSB10_HUMAN |
| 7871 | RQSSGSATNVASTPDNR202000000000000             | sp O43149 ZZEF1_HUMAN |
| 7872 | ESSPIPSPTSDR200002000000                     | sp Q66K74 MAP1S_HUMAN |
| 7873 | DQQNLPYGVTPASPSGHSQGR20000000000             | sp Q7Z460 CLAP1_HUMAN |
| 7874 | ESSITSCCSTSSCADDEGVR2E+19                    | sp Q01082 SPTB2_HUMAN |
| 7875 | RSPPAPGLQPMR200000000100                     | sp Q7KZI7 MARK2_HUMAN |
| 7876 | HQSFGAAVLSR2000000000                        | sp Q9UIC8 LCMT1_HUMAN |
| 7877 | LALSPEDKPIR200000000                         | sp P15408 FOSL2_HUMAN |
| 7878 | GVSRSPPK2020000                              | sp Q5VV41 ARHGG_HUMAN |
| 7879 | GTEPSPGTQPSPRVSPAGPPEGVPEEAQPPR2.0000002E+32 | sp O15417 TNC18_HUMAN |
| 7880 | ASSLESPK20000020000                          | sp Q8TAD8 SNIP1_HUMAN |
| 7881 | SSSSGVPYSPAIPNK20000000                      | sp Q8WUZ0 BCL7C_HUMAN |
| 7882 | HDYDSSSEQAEDSYEASPGSETQR20000000000000000    | sp Q9UHB6 LIMA1_HUMAN |
| 7883 | FHHTIGGSR200                                 | sp Q9UPT5 EXOC7_HUMAN |
| 7884 | TFSLTEVR202000000                            | sp P98175 RBM10_HUMAN |
| 7885 | LSVSVTSRPSTPTLGTPTQTMSVSTK2.02E+24           | sp P61313 RL15_HUMAN  |
| 7886 | KRTPSPSYQR200020000                          | sp O95239 KIF4A_HUMAN |
| 7887 | GPGQPSSPQR20000                              | sp Q16594 TAF9_HUMAN  |
| 7888 | QDDGSSASPSVQGAPR2000000000                   | sp Q5T200 ZC3HD_HUMAN |
| 7889 | STSAPQMSPGSSDNQSSSPQPAQQK1.000000022E+19     | sp O95400 CD2B2_HUMAN |
| 7890 | LSTTPSPTSSLHEDGVEDFR220000000000000          | sp Q9NQA3 WASH6_HUMAN |
| 7891 | LGSLTPEIVSTPSSPEEDK200000000                 | sp Q14157 UBP2L_HUMAN |
| 7892 | EYSPPPSPLR200020000                          | sp O94842 TOX4_HUMAN  |
| 7893 | SWSPPEVSR200000000                           | sp Q14CS0 UBX2B_HUMAN |
| 7894 | DVTPPPETEVLK2000000000000                    | sp Q9HCD6 TANC2_HUMAN |
|      |                                              | sp Q9NR19 ACSA_HUMAN  |
|      |                                              | sp P27816 MAP4_HUMAN  |

|      |                                             |                       |
|------|---------------------------------------------|-----------------------|
| 7895 | SRPTSFADELAAR20002000000000                 | sp Q9Y4E1 FA21C_HUMAN |
|      |                                             | sp Q641Q2 FA21A_HUMAN |
|      |                                             | sp Q5SNT6 FA21B_HUMAN |
| 7896 | TESPPSPSSDVEDAR20020200000000               | sp Q9BRK4 LZTS2_HUMAN |
| 7897 | SREDLSAQPVQTK20000000000000                 | sp Q07157 ZO1_HUMAN   |
| 7898 | SWSPPEVSR20200000000                        | sp Q9NR19 ACSA_HUMAN  |
| 7899 | APSDSSLGTPSDGRPELR2000002000000000          | sp Q15642 CIP4_HUMAN  |
| 7900 | AAESETPGKSPEKKPK20000020000000              | sp 076021 RL1D1_HUMAN |
| 7901 | SRSRSPPPVSK202000000000                     | sp Q01130 SRSF2_HUMAN |
| 7902 | LHQLSGSDQLESTAHSR200000000000               | sp 060271 JIP4_HUMAN  |
| 7903 | SPSPTPTGPSR20000000000000                   | sp P49450 CENPA_HUMAN |
| 7904 | LDSSEMDHSENYDTMSSPLPGK2.2010000000001E+21   | sp Q9NTI5 PDS5B_HUMAN |
| 7905 | ETPRPEGGSPAGTPPQPK20000020000000            | sp Q9BR39 JPH2_HUMAN  |
| 7906 | STYFSDEEELSD200000200                       | sp Q8TBF4 ZCRB1_HUMAN |
| 7907 | SKSHESQLGNR2000000000                       | sp Q8IVT5 KSR1_HUMAN  |
| 7908 | KSDGACDPSDDKENSQIAQDHQK20020000000000000000 | sp Q9UIG0 BAZ1B_HUMAN |
| 7909 | KTSEDQAAILPGK200000000000                   | sp Q12968 NFAC3_HUMAN |
| 7910 | SLSPILPGR2000000000                         | sp Q6ZS75 ARHG1_HUMAN |
| 7911 | SLSYSPVER200000                             | sp Q9UQ35 SRRM2_HUMAN |
| 7912 | QSPPLPGR20000000                            | sp Q9C0B5 ZDHC5_HUMAN |
| 7913 | YYGGAGGSPGK20000                            | sp Q9BUH8 BEGIN_HUMAN |
| 7914 | SSGSPYGGYGGSGGGSGGYGSR200000000000          | sp P51991 ROA3_HUMAN  |
| 7915 | TEMDKSPFNPSQDSR20000000002000               | sp P08651 NFIC_HUMAN  |
| 7916 | MALEVGMEDGQLSDSDMTVAPSDRPLQPK1.0000001E+33  | sp Q9H814 PHAX_HUMAN  |
| 7917 | SPSMVPSPGWVASPK210002000002000              | sp Q86UU0 BCL9L_HUMAN |
| 7918 | NRSPSDDMEDYSPPSLSEVAR2.0202000002E+21       | sp Q6KC79 NIPBL_HUMAN |
| 7919 | STPLASPSPGRSPQR20000000200020000            | sp Q8WYP5 ELYS_HUMAN  |
| 7920 | SRSSVGSSSSYPIPAVSR2002220000000000          | sp Q15149 PLEC_HUMAN  |
| 7921 | TNSSDSERSPDLGHSTQIPR22020020000000000000    | sp Q6VY07 PACS1_HUMAN |
| 7922 | TPTPSTPGDTQPNTAPVPPAEDGIK2.000000000002E+26 | sp Q14839 CHD4_HUMAN  |
| 7923 | EEKESEDKPEIEDVGSDEEEKK2.0000000002E+19      | sp P07900 HS90A_HUMAN |
| 7924 | SSPGAVAGLSNAPGTPR2000000000000000           | sp Q9BWG4 SSBP4_HUMAN |
| 7925 | SRSRSPTPSSAGLGSNSAPPIDSR2.02020022E+24      | sp Q8IWX8 CHERP_HUMAN |
| 7926 | IRHSDSDTSPPR200220000                       | sp Q9BRD0 BUD13_HUMAN |
| 7927 | LQQTVPADASPDSK200000                        | sp Q9NS56 TOPRS_HUMAN |
| 7928 | STPLASPSPGRSPQR20000                        | sp Q8WYP5 ELYS_HUMAN  |
| 7929 | TTYDSAEENKENLYAGK20000000000000000000       | sp Q9HAW4 CLSPN_HUMAN |
| 7930 | IPESETESTASAPNSPR20002000                   | sp Q07889 SOS1_HUMAN  |
| 7931 | SPPPRSPSPPTH2000020002000000                | sp Q96HA1 P121A_HUMAN |
| 7932 | SSSLGSTPHEELER22002200000000                | sp Q9NRA8 4ET_HUMAN   |
| 7933 | HTPNTSDNEGSDTEVCGPNPSK20000200000000000000  | sp Q8NEN9 PDZD8_HUMAN |
| 7934 | ASIANSDGPTAGSQTPPFK20000000                 | sp 075167 PHAR2_HUMAN |
| 7935 | KPSGSGDQSKPNCTK20000000                     | sp Q8TBM8 DJB14_HUMAN |
| 7936 | SPSLGMLSTATR20000000000000                  | sp Q14687 GSE1_HUMAN  |
| 7937 | TKCEILSDESSDEDEK200222000000                | sp P35659 DEK_HUMAN   |
| 7938 | SLGDEGLNR2000000000                         | sp Q01970 PLCB3_HUMAN |
| 7939 | SAGGSSPEGGEDSDREDGNYCPPVKR2000000000000000  | sp Q9H6Z4 RANB3_HUMAN |
| 7940 | GTPPPVFTPPLPK20000000000000                 | sp Q6NZY4 ZCHC8_HUMAN |
| 7941 | AQTLPTS VVTITSESSPGK20000                   | sp Q01082 SPTB2_HUMAN |
| 7942 | LSPSPSSR20200000                            | sp P20700 LMNB1_HUMAN |
|      |                                             | sp Q03252 LMNB2_HUMAN |
| 7943 | SYQNSPSSDDGIRPLPEYSTEK20220000000000000000  | sp Q15648 MED1_HUMAN  |
| 7944 | VYEDSGIPLPAESPK2000                         | sp Q8IXM2 BAP18_HUMAN |
| 7945 | GPGDLMGPQGLSPEEMAR20000000                  | sp Q86UU0 BCL9L_HUMAN |

|      |                                                            |                       |
|------|------------------------------------------------------------|-----------------------|
| 7946 | GYYSYSPVSVSGSGSTAGSR20200000000                            | sp Q15149 PLEC_HUMAN  |
| 7947 | SLSSSPVKK20200000                                          | sp Q9H3Q1 BORG4_HUMAN |
| 7948 | TPIQVESPQPGLPAGEQLEGLK2.0000002E+23                        | sp Q99618 CDCA3_HUMAN |
| 7949 | SLHSAHSLASR200200                                          | sp O15027 SC16A_HUMAN |
| 7950 | AKTQTPPVSPAPQPTEER20000020000000000                        | sp Q14247 SRC8_HUMAN  |
| 7951 | GTEPSPGGTPQPSRPVSPAGPPEGVPEEAQPPR2E+32                     | sp Q8WUZO BCL7C_HUMAN |
| 7952 | NEEDEGHNSNSPR2000                                          | sp Q14103 HNRPD_HUMAN |
| 7953 | VDEDSAEDTQSNHGK200000                                      | sp Q9H2G2 SLK_HUMAN   |
| 7954 | DMLPSPEQTLSPK200000                                        | sp Q53SF7 COBL1_HUMAN |
| 7955 | SMGTGDTPGLEVPSSPLR20000                                    | sp Q86WB0 NIPA_HUMAN  |
| 7956 | SYQNSPSSDDGIRPLPEYSTEK22000000000000000                    | sp Q15648 MED1_HUMAN  |
| 7957 | LQYYYSSEDESDHEDKDR2200002000000000                         | sp Q13371 PHLP_HUMAN  |
| 7958 | DVDDGSGSPHSPHQLSSK20200000002000                           | sp Q9H4A3 WNK1_HUMAN  |
| 7959 | QENCGAQQVPAGGTSTPPSSPVR20000020000                         | sp Q96G46 DUS3L_HUMAN |
| 7960 | KGTTPPRSPEASPK20000200000000                               | sp Q9HDC5 JPH1_HUMAN  |
|      |                                                            | sp P01891 1A68_HUMAN  |
|      |                                                            | sp P01892 1A02_HUMAN  |
| 7961 | KGGSYSQAASSDSAQGSVDVSLTACK20002002000000                   | sp P05534 1A24_HUMAN  |
|      |                                                            | sp Q09160 1A80_HUMAN  |
|      |                                                            | sp P10316 1A69_HUMAN  |
|      |                                                            | sp P30447 1A23_HUMAN  |
| 7962 | ISDSESEDPPRNQASDSENEELPKPR2.0200000000002E+25              | sp Q96ST2 IWS1_HUMAN  |
| 7963 | AQSVSPVQAPPPGSAQLLPGK2E+20                                 | sp Q96RK0 CIC_HUMAN   |
| 7964 | DAVFDGSSCISPTIVQQFGYQR20000000000                          | sp P04049 RAF1_HUMAN  |
| 7965 | LMELHGEGSSSGK2000                                          | sp P61247 RS3A_HUMAN  |
| 7966 | TESVSDKEDKPLAPSGGTGPEQPPPPCPSQTGSPPVGLIK2000000000000<br>0 | sp Q8WWM7 ATX2L_HUMAN |
| 7967 | SIVPSSPQQR2000000                                          | sp Q9P246 STIM2_HUMAN |
| 7968 | WFSNPSR200000                                              | sp Q9NRA8 4ET_HUMAN   |
| 7969 | TPPEDCEGPFRAEILK2000000000000000000                        | sp P49790 NU153_HUMAN |
| 7970 | SKGPSAAGEQEPDKESGASVDEVAR2E+25                             | sp P50579 MAP2_HUMAN  |
| 7971 | LILTDSGSAPTFCSDDEDVAPLSAK2000000000000                     | sp P78312 F193A_HUMAN |
| 7972 | RRSSPSARPPDVPGQQPQAAK2.002E+19                             | sp Q96JP5 ZFP91_HUMAN |
| 7973 | EHYPVSSPSSPSPAQGGVSR3.000000202E+20                        | sp O75179 ANR17_HUMAN |
| 7974 | SHSGTSPDNTAPPPPPRPPQPSHSR2.0202E+25                        | sp Q96D71 REPS1_HUMAN |
| 7975 | IAISPLKSPNK200020000                                       | sp Q6MZP7 LIN54_HUMAN |
|      |                                                            | sp P20700 LMNB1_HUMAN |
| 7976 | LKLSPSSSR20000000                                          | sp Q03252 LMNB2_HUMAN |
|      |                                                            | sp Q16629 SRSF7_HUMAN |
| 7977 | YFQSPSR200                                                 | sp Q9Y6E2 BZW2_HUMAN  |
| 7978 | FVEWLQNAEEEESEGEEN202000000                                | sp Q53LP3 SWAHC_HUMAN |
| 7979 | DLVMGSSPQLK200000                                          | sp Q12965 MYO1E_HUMAN |
| 7980 | NQYVPYPHAPGSQR2000                                         | sp Q8IYB7 DI3L2_HUMAN |
| 7981 | RPGTQGHGPEKEEEEESDGEPEDSSTS200000000000                    | sp Q8IWX8 CHERP_HUMAN |
| 7982 | SPTPPSSAGLGSNSAPPIDPSR20000200000000000                    | sp Q02880 TOP2B_HUMAN |
| 7983 | KTSFDQDSVDVIFPSDFPTEPPSLPR2.00002E+24                      | sp Q9BTA9 WAC_HUMAN   |
| 7984 | DGGTYSYPQENSHNHSALHSSNSHSSNPSNPSK2E+31                     | sp Q12888 TP53B_HUMAN |
| 7985 | SNVSSPATPTASSSSSTPTR2020000000000000                       | sp Q9Y4H2 IRS2_HUMAN  |
| 7986 | HSSETFSSTTTVTPVSPSFAHNPK2002000000000                      | sp Q09666 AHNK_HUMAN  |
| 7987 | HRSNSFSDER202000000                                        | sp Q01130 SRSF2_HUMAN |
| 7988 | SPPKSPEEEGAVSS2000000000000200                             | sp Q13523 PRP4B_HUMAN |
| 7989 | SLSPKPR20200000                                            | sp P18583 SON_HUMAN   |
| 7990 | ASESSSEEKDDYEIFVK2200000000000000                          | sp Q9UQ35 SRRM2_HUMAN |
| 7991 | SRSPSSPELNK20200200000000                                  | sp P51003 PAPOA_HUMAN |
| 7992 | TSPLNSSGSSQGR2000000000000000                              |                       |

|      |                                                  |                       |
|------|--------------------------------------------------|-----------------------|
| 7993 | IESPKLER2000000                                  | sp Q92598 HS105_HUMAN |
| 7994 | SLSEQPVMdTATATEQAK20000000000000000000           | sp P18615 NELFE_HUMAN |
| 7995 | SATRPSPSPERSSTGPEPPAPTLLAER2. 0200022E+23        | sp Q9UQ35 SRRM2_HUMAN |
| 7996 | DPSIKPVTPSPSK2020000                             | sp Q9H792 PEAK1_HUMAN |
| 7997 | IPMPSPSPQPR200000                                | sp Q8WUF5 IASPP_HUMAN |
| 7998 | AGDPGEMPSPTGLGQPK2000000000                      | sp Q9UIF9 BAZ2A_HUMAN |
| 7999 | KHSSDDYYGDISSLESSQK3000000000000000              | sp Q9UGU5 HMGX4_HUMAN |
| 8000 | APSASDSKADSDGAKPEPVAMAR2. 0002000002E+23         | sp Q7Z4V5 HDGR2_HUMAN |
| 8001 | TPTPSTPGDTQPNTAPVPPAEDGIK2. 002E+24              | sp Q14839 CHD4_HUMAN  |
| 8002 | VEGSPTEEANLPTELQDNSLSPAASEAGEK2E+27              | sp P50851 LRBA_HUMAN  |
|      |                                                  | sp P01891 1A68_HUMAN  |
|      |                                                  | sp P01892 1A02_HUMAN  |
|      |                                                  | sp P05534 1A24_HUMAN  |
| 8003 | GGSYSQAASSDSAQGSVDVSLTACK20000000000000          | sp Q09160 1A80_HUMAN  |
|      |                                                  | sp P10316 1A69_HUMAN  |
|      |                                                  | sp P30447 1A23_HUMAN  |
| 8004 | SSDEENGPPSSPDLDR2000000020000000                 | sp Q96B36 AKTS1_HUMAN |
| 8005 | SPFNPSPPQDSR2000002000                           | sp P08651 NFIC_HUMAN  |
| 8006 | SYPGHVQPATAR20000000000000                       | sp Q86VS8 HOOK3_HUMAN |
| 8007 | GFSQYGVSGSPTK20000                               | sp Q9NXC5 MIO_HUMAN   |
| 8008 | RHSHSHSPMSTR20202010000                          | sp P62995 TRA2B_HUMAN |
| 8009 | SPSPSPTPEAK202020000000                          | sp Q8TAQ2 SMRC2_HUMAN |
| 8010 | LSTTPSPTSSLHEDGVEDFR2. 22000002E+19              | sp 094842 TOX4_HUMAN  |
| 8011 | TVSTSSQPEENVDR202000000000                       | sp P42684 ABL2_HUMAN  |
| 8012 | NTETSKSPEKDVPMVEK200000000000                    | sp 014617 AP3D1_HUMAN |
| 8013 | REPGGWGAGASAPVEDSDAETYGEENDEQGNYSK30000000000000 | sp Q9NQS1 AVEN_HUMAN  |
| 8014 | KPPDSYPPK230000                                  | sp 043184 ADA12_HUMAN |
| 8015 | ASSHSSQTQGGGSVTK20000                            | sp P02545 LMNA_HUMAN  |
| 8016 | ILKSPEIQR2000000                                 | sp P36578 RL4_HUMAN   |
| 8017 | RRSLSPKPR20200000                                | sp Q13523 PRP4B_HUMAN |
| 8018 | RPPGPDSPDGPR2000000                              | sp P22455 FGFR4_HUMAN |
| 8019 | SRGSSQELDVKPSASPQER22000000020000000             | sp Q9UQ35 SRRM2_HUMAN |
| 8020 | EALGQNEESPK2000                                  | sp Q9H8Y5 ANKZ1_HUMAN |
| 8021 | DLPTIPGVTSPSSDEPPMEASQSHLR200000001000000000     | sp Q13541 4EBP1_HUMAN |
| 8022 | LAIQGPEDSPSR20000                                | sp Q15773 MLF2_HUMAN  |
| 8023 | EMSSDSEYSDDDRTK220200020000000                   | sp 060841 IF2P_HUMAN  |
| 8024 | ASVALTPTAPSR200020000200                         | sp P28290 SSFA2_HUMAN |
| 8025 | VATPPNQNK200000000                               | sp Q6NUQ4 TM214_HUMAN |
| 8026 | LSSLPLR2020000                                   | sp Q66K74 MAP1S_HUMAN |
| 8027 | KPPAPSPVQSQSPSTNWSAPVPVKK2. 000202000002E+20     | sp Q8IYB3 SRRM1_HUMAN |
| 8028 | CALSSPSLAFTPIK200000000000                       | sp Q8NFH5 NUP53_HUMAN |
| 8029 | HTDDEMTGYVATR200                                 | sp Q16539 MK14_HUMAN  |
| 8030 | GFSLEELR2000000                                  | sp P26373 RL13_HUMAN  |
|      |                                                  | sp 043768 ENSA_HUMAN  |
| 8031 | YFDSGDYNMAK200001000                             | sp P56211 ARP19_HUMAN |
|      |                                                  | sp Q9UKV3 ACINU_HUMAN |
| 8032 | EKSKSPSPR202020000                               | sp Q7Z309 F122B_HUMAN |
| 8033 | MFVSSGLPPSPVPSR20002000                          | sp Q8IWS0 PHF6_HUMAN  |
| 8034 | DRSPHRSSPSDTRPK20000200000000                    | sp Q96JH7 VCIP1_HUMAN |
| 8035 | TVSPSTIR2000000                                  | sp Q8TEQ6 GEMI5_HUMAN |
| 8036 | ENSGPVENGVSQEGEEQAREPELPCGLAPAVSR2E+32           | sp Q8IYB3 SRRM1_HUMAN |
| 8037 | TASPPPPPKR200000000                              | sp Q86TB9 PATL1_HUMAN |
| 8038 | RSTSPIIGSPPVR2020000000000                       | sp P48634 PRC2A_HUMAN |
| 8039 | QRGETGSETHESDLAPSDK200020000000000000            | sp Q9Y2L9 LRCH1_HUMAN |
| 8040 | ENSPAVSPTTSTAPFGLKPR2. 000002E+19                |                       |



|      |                                                        |                       |
|------|--------------------------------------------------------|-----------------------|
| 8041 | RPNKQEESESPVERPLK200000000                             | sp Q96SB4 SRPK1_HUMAN |
| 8042 | LKSSTSFANIQENSN220000000000                            | sp Q86WC4 OSTM1_HUMAN |
| 8043 | YGPADVDTTGGGATDSKDDDDIDLFGSDDEESEEAKR2.00000000002E+23 | sp P24534 EF1B_HUMAN  |
| 8044 | SGKYDLDFK2000000000                                    | sp P06733 ENOA_HUMAN  |
| 8045 | SPVPSPGSSSPQLQVK200000000                              | sp Q8N3F8 MILK1_HUMAN |
| 8046 | ILEGQQSLSGSPLQPIPASPPPQIPPGLRPR2.000000000002E+25      | sp O15446 RPA34_HUMAN |
| 8047 | IRLSSASR200                                            | sp Q96MU7 YTDC1_HUMAN |
| 8048 | AGSSASSPPSASSSPHPSAAVPAADPADSASGSSNK2E+33              | sp Q8NDF8 PAPD5_HUMAN |
| 8049 | TPHYGSQTPLHDGSR2000000200000000                        | sp O00267 SPT5H_HUMAN |
| 8050 | EYIPGQPPLSQSSDSSPTR220000000                           | sp P07814 SYEP_HUMAN  |
| 8051 | TRESHRSRSSPTAGPSTEGAEGPEEK2.0222E+21                   | sp Q8NHM5 KDM2B_HUMAN |
| 8052 | DLDRPESQSPK2000                                        | sp Q8WUA4 TF3C2_HUMAN |
| 8053 | AKSPTPSPPR20002020000                                  | sp Q8IYB3 SRRM1_HUMAN |
| 8054 | SPIIHSPK200002000                                      | sp O94913 PCF11_HUMAN |
| 8055 | HSSETFSSTTTVTPVSPSFAHNPK2E+23                          | sp Q9Y4H2 IRS2_HUMAN  |
| 8056 | DNEESEQPPVPGTPTLR200000                                | sp O15439 MRP4_HUMAN  |
| 8057 | GTEPSPGGTPQPSRPVSPAGPPEGVPEEAQPPR2.002E+32             | sp Q8WUZ0 BCL7C_HUMAN |
| 8058 | NHSGSRTPPVALNSSR20200000000000                         | sp Q9UQ35 SRRM2_HUMAN |
| 8059 | KSSPSKENESSDSEEEVSRPR200002202000000000                | sp Q6KC79 NIPBL_HUMAN |
| 8060 | SMPEGFGVSR20000000000                                  | sp O43166 SI1L1_HUMAN |
| 8061 | DGGTSYSQENSHNHSALHSSNSHSSNPSNPSK2E+28                  | sp Q9BTA9 WAC_HUMAN   |
| 8062 | NHETDGGSAHGDDDDGPHFEPVVPLPDK2E+26                      | sp P49792 RBP2_HUMAN  |
| 8063 | STSAPQMSPGSSDNQSSSPQAQK2.00012002E+23                  | sp Q14157 UBP2L_HUMAN |
| 8064 | SPTPPSSAGLGSNSAPPIDSR2.0022E+20                        | sp Q8IWX8 CHERP_HUMAN |
| 8065 | SKLSPSPSLR20000000                                     | sp Q5T200 ZC3HD_HUMAN |
| 8066 | SPLTATPTFVTDSESTR200000000000000000                    | sp P13056 NR2C1_HUMAN |
| 8067 | ATVTPSPVKGK20002000000                                 | sp Q9H1E3 NUCKS_HUMAN |
| 8068 | KAEPSEVDMNSPK2000                                      | sp Q9NR30 DDX21_HUMAN |
| 8069 | LSPDPVAGSAVSQELR2000000000000000                       | sp Q9BUR4 WAP53_HUMAN |
| 8070 | LNDPFQPPFGNDSPK2000                                    | sp P42566 EPS15_HUMAN |
| 8071 | RPISDDDCPSASK20000000000                               | sp Q96PU4 UHRF2_HUMAN |
| 8072 | LPSTSDDCPAIGTPLR2000000020000                          | sp Q15648 MED1_HUMAN  |
| 8073 | ARLSYSDK200000                                         | sp Q05655 KPCD_HUMAN  |
| 8074 | QQDLHLESPQRQPEYSPESPR200000002000000                   | sp Q9H6F5 CCD86_HUMAN |
| 8075 | TSVATQCDPEEIIVLSDS2000000000000200                     | sp Q9UER7 DAXX_HUMAN  |
| 8076 | DSLGTYSR200000000                                      | sp Q9C0C2 TB182_HUMAN |
| 8077 | SDREETESSEGEAAAGGGAK2.00002022E+21                     | sp Q96G23 CERS2_HUMAN |
| 8078 | SLHSAHSLASR200200200000                                | sp O15027 SC16A_HUMAN |
| 8079 | WGQPPSPTPVPRPPDADPNTSPKPLEGRPER2E+27                   | sp Q14839 CHD4_HUMAN  |
| 8080 | KSPLGGGGSGASSQAACLK2E+19                               | sp Q68DK7 MSL1_HUMAN  |
| 8081 | SVSHGSNHTQKPDEQR200200000000000                        | sp Q9Y520 PRC2C_HUMAN |
| 8082 | RRTSPPPR20200000                                       | sp Q8IYB3 SRRM1_HUMAN |
| 8083 | NDLQDTEISPR2000                                        | sp Q9NS91 RAD18_HUMAN |
| 8084 | AGSPLCNSNLQDSEEDIEPSYSLFR2E+23                         | sp Q9NRY4 RHG35_HUMAN |
| 8085 | YGHKSPHFR20200000                                      | sp Q86U06 RBM23_HUMAN |
| 8086 | QPLLLSEDEEDTK200000000                                 | sp B5ME19 EIFCL_HUMAN |
| 8087 | TRDDGDEEGLLTHSEEELEHSQDTDADDGALQ2002000000000          | sp Q99613 EIF3C_HUMAN |
| 8088 | SSSKDRPSQAAGDNQDEAK2.2E+20                             | sp Q9UKM9 RALY_HUMAN  |
| 8089 | FHSPSTWSPNKDTPQEK20002000000000000                     | sp Q9Y2W1 TR150_HUMAN |
| 8090 | AQSSPAAPASLSAPEPASQAR2E+19                             | sp Q99590 SCAFB_HUMAN |
| 8091 | SPSVSSPEPAEK20220000000                                | sp Q8WUI4 HDAC7_HUMAN |
| 8092 | AGLGSPPERPKTSPGSPR200000020002000                      | sp Q9UQ35 SRRM2_HUMAN |
|      |                                                        | sp Q9H6F5 CCD86_HUMAN |

|      |                                                |                       |
|------|------------------------------------------------|-----------------------|
| 8093 | LSDGDMTSALR2000000000                          | sp Q8WXE1 ATRIP_HUMAN |
| 8094 | SEGFMDR200000000                               | sp Q7Z4V5 HDGR2_HUMAN |
| 8095 | FQSQADQDQASGLQSPSR200200                       | sp Q9P2B4 CT2NL_HUMAN |
| 8096 | RPACDPEPGESGSSSDEGCTVVRPEK2022000000000000     | sp O15541 R113A_HUMAN |
| 8097 | DGDSYDPYDFSDTEEEMPQVHTPK300002000000002000     | sp P25205 MCM3_HUMAN  |
| 8098 | RASQGLLSIENSESDSSEAK2E+19                      | sp Q5UIP0 RIF1_HUMAN  |
| 8099 | DSSFTEVPRSPK2000                               | sp O95425 SVIL_HUMAN  |
| 8100 | NSASATPLSGNSSR2000000                          | sp Q9Y608 LRRF2_HUMAN |
| 8101 | SLSDSEDDSK2000200000                           | sp Q13185 CBX3_HUMAN  |
| 8102 | AAESETPGKSPEKKPK200020000000                   | sp O76021 RL1D1_HUMAN |
| 8103 | SPLAQMEER20000000000                           | sp Q16181 SEPT7_HUMAN |
| 8104 | DGDSYDPYDFSDTEEEMPQVHTPK300200000100002000     | sp P25205 MCM3_HUMAN  |
| 8105 | HGGSPQPLATTPLSQEPVNPPEASPTR2002000000020000000 | sp Q9UQ35 SRRM2_HUMAN |
| 8106 | ILDNTGEPAPVLSSPPADVSTFLAFPSPEK20000            | sp P46060 RAGP1_HUMAN |
| 8107 | GPEENYSRPEAPNEFYDGDNDKESDVEI200000             | sp O15379 HDAC3_HUMAN |
| 8108 | DYGHSSSRDDYPSR200000000                        | sp P38159 RBMX_HUMAN  |
| 8109 | QPYPSPPFNDQHSQDLDSR20000000                    | sp Q96E39 RMXL1_HUMAN |
| 8110 | AQSPSSGDEPEPSGK2022000000000000                | sp Q07157 ZO1_HUMAN   |
| 8111 | ETESAPGSPR2000002000                           | sp Q9HCM7 FBSL_HUMAN  |
| 8112 | LQTTDNLPMSPPEEFDEVSRI20000000000               | sp Q6PKG0 LARP1_HUMAN |
| 8113 | VQMTSPSSTGSPMFK200000200000                    | sp P42224 STAT1_HUMAN |
| 8114 | SLSPILPGR2020000000                            | sp P49790 NU153_HUMAN |
| 8115 | SIEDLHR20000000                                | sp Q6ZSZ5 ARHG1_HUMAN |
| 8116 | AMVDSQQKSPVK20000                              | sp Q96PY5 FMNL2_HUMAN |
| 8117 | SESPKEPEQLR202000000000                        | sp Q03001 DYST_HUMAN  |
| 8118 | GSPVFLPR20000000                               | sp P09651 ROA1_HUMAN  |
| 8119 | TSSVSSISQVSPER20000000000000                   | sp Q9NYV4 CDK12_HUMAN |
| 8120 | ETVQTTQSPTPVEK20000000000000                   | sp P42356 PI4KA_HUMAN |
| 8121 | TEMDKSPFNPSQDSR2000000000020000000             | sp Q9UPN6 SCAF8_HUMAN |
| 8122 | RVSADSQPFQHGDK20000000000000                   | sp P08651 NFIC_HUMAN  |
| 8123 | SPAVATSTAAPPPSSPLPSK2.00002E+21                | sp Q96AX9 MIB2_HUMAN  |
| 8124 | RGSASGSEPAQSDR20000000000000                   | sp Q14157 UBP2L_HUMAN |
| 8125 | RPSNSTPPPTQLSK2000000000                       | sp P50747 BPL1_HUMAN  |
| 8126 | VTQHESDNENEIQIQNK2000000000000000              | sp Q14738 2A5D_HUMAN  |
| 8127 | ASESSSEKDDYEIFVK22000000000000                 | sp Q5VZL5 ZMYM4_HUMAN |
| 8128 | ESGVVAVSPEK20000                               | sp P18583 SON_HUMAN   |
| 8129 | DKDDQEWESPPKPTVFISGVIAR202000000000000000      | sp Q96T58 MINT_HUMAN  |
| 8130 | RPPTPEAQSEER20000200000                        | sp P51397 DAP1_HUMAN  |
| 8131 | QADPQPQAWPPDSPVR20000                          | sp Q9BTK6 PAGR1_HUMAN |
| 8132 | RPSQGPPAR20000000                              | sp Q63ZY3 KANK2_HUMAN |
| 8133 | SLHSAHSLASR200200200200                        | sp Q9COC2 TB182_HUMAN |
| 8134 | RQSVSPPYKEPSAYSSTR2000030000000000000          | sp O15027 SC16A_HUMAN |
| 8135 | RSPSPAPPPR20000000                             | sp Q9NYV4 CDK12_HUMAN |
| 8136 | IEIIQPLLDMAAGTSNAAPVAENVTNNEGSPPPPVK20000000   | sp Q8IYB3 SRRM1_HUMAN |
| 8137 | AGASIPSSGAASPR20000000                         | sp O95104 SFR15_HUMAN |
| 8138 | SSPEQPIGQGR20000000000                         | sp Q9P270 SLAI2_HUMAN |
| 8139 | KGGYSQAASSDSAQSDVSLTACK20002000000000          | sp Q8N201 INT1_HUMAN  |
| 8140 | RLSSSESPQRDPPPPPPPLLR2.202E+20                 | sp P05534 1A24_HUMAN  |
|      |                                                | sp Q09160 1A80_HUMAN  |
|      |                                                | sp P30447 1A23_HUMAN  |
|      |                                                | sp P01891 1A68_HUMAN  |
|      |                                                | sp P01892 1A02_HUMAN  |
|      |                                                | sp P10316 1A69_HUMAN  |
|      |                                                | sp Q9H2G4 TSYL2_HUMAN |

|      |                                                    |                        |
|------|----------------------------------------------------|------------------------|
| 8141 | QDDSPSGASYGQDYDLSPSR300000020000                   | sp Q9NYV4 CDK12_HUMAN  |
| 8142 | ASHTLLPSHR2000000000                               | sp Q9UKV3 ACINU_HUMAN  |
| 8143 | APSASDSKADSDGAKPEPVAMAR2.0002020002E+23            | sp Q7Z4V5 HDGR2_HUMAN  |
| 8144 | ELSVQDQPSLSPTSLQNSSHTTTAK2000000000000000          | sp Q95628 CNOT4_HUMAN  |
| 8145 | EVEEDESEDEEMSEDEEDSSGEEVVIPQKK2.00000200000002E+25 | sp P19338 NUCL_HUMAN   |
| 8146 | SAMDSPVPASMFAPESPSPAAR10000002000000               | sp Q00178 GTPB1_HUMAN  |
| 8147 | SSTPSSPTGTSSSDSGHHIGWGER2.02E+23                   | sp P46019 KPB2_HUMAN   |
| 8148 | YSPSQNSPIHHIPSR30000020000000000                   | sp Q9NYF8 BCLF1_HUMAN  |
| 8149 | DLPTIPGVTSPSSDEPPMEASQSHLR20000000000000           | sp Q13541 4EBP1_HUMAN  |
| 8150 | SPPPVS20000000                                     | sp Q01130 SRSF2_HUMAN  |
| 8151 | IDTHSPSHSSTVK2000000000                            | sp Q8NI27 THOC2_HUMAN  |
| 8152 | TLVHSSSDGHIDPQHAAGK20000000000000                  | sp Q8N5C8 TAB3_HUMAN   |
| 8153 | ERSPSPLR2000000                                    | sp Q9Y2V2 CHSP1_HUMAN  |
| 8154 | SGSDAGEARPPTPASPR2000000000002000                  | sp Q96FS4 SIPA1_HUMAN  |
| 8155 | QSPSPSEVSQSPGR20000                                | sp P55201 BRPF1_HUMAN  |
| 8156 | RESESEDETTPAAPQLIKK202000000000000000              | sp Q060832 DKC1_HUMAN  |
| 8157 | LSSTDDGYIDLQFK22000000000000                       | sp Q96A57 TM230_HUMAN  |
| 8158 | SQSSDLLER2002000000                                | sp Q8IVT2 MISP_HUMAN   |
| 8159 | TPEPSSPVKEPPPVLAKPK2000000000000000                | sp Q86TC9 MYPN_HUMAN   |
| 8160 | YISQEEGPLSPFLGQLDEDYR20000000000000                | sp Q5VUA4 ZN318_HUMAN  |
| 8161 | SSLSSHSHQSQIYR2202000000000000                     | sp Q015027 SC16A_HUMAN |
| 8162 | RRSPSPAPPPR2000000000                              | sp Q8IYB3 SRRM1_HUMAN  |
| 8163 | DCNESTDNDELEDEPEEPFYR220000000000000000            | sp Q9Y2K1 ZBTB1_HUMAN  |
| 8164 | AGLSPAPELLSR2000000000                             | sp Q095402 MED26_HUMAN |
| 8165 | ISQVSSGETEYNPTEAR200000000000000000                | sp Q6ZJ1 NBEL2_HUMAN   |
| 8166 | LGGDEDEGEEEEEDENSRSQSEDDSETEKPEADDPK20200000000000 | sp Q9UHR5 S30BP_HUMAN  |
| 8167 | ASPVTSAAAAPTASPANK20000000000000000000             | sp Q9UIF9 BAZ2A_HUMAN  |
| 8168 | DLVLPQALPASPALK200000                              | sp Q15554 TERF2_HUMAN  |
| 8169 | SRSYSPAHNR20202000000                              | sp Q9Y2W1 TR150_HUMAN  |
| 8170 | MQAGQISVQSSEPSSPEPGK200002000000                   | sp P37275 ZEB1_HUMAN   |
| 8171 | SRDESASETSTPSEHSAAPSPQVEVR200000000000000000       | sp Q92614 MY18A_HUMAN  |
| 8172 | SLDGAEFRPASVSENHDAGPDGDKR2.0000000002E+26          | sp Q9H4G0 E41L1_HUMAN  |
| 8173 | SLSPPHKR202000000                                  | sp Q5VV67 PPRC1_HUMAN  |
| 8174 | KRPACDPEPGESGSSSDEGCTVVRPEK20022000020000000       | sp Q015541 R113A_HUMAN |
| 8175 | KESKEETSIDVAGKPNEVTK2.00002E+19                    | sp P53985 MOT1_HUMAN   |
| 8176 | RREEGPPPPSPDGASSDAEPEPPSGR200002200000000000       | sp Q9NTJ3 SMC4_HUMAN   |
| 8177 | FFTTGSDSESESSLGEELVTKPVGGNYGK2.02022E+23           | sp B5ME19 EIFCL_HUMAN  |
| 8178 | LSNSDSQDIQGR200000000000                           | sp Q99613 EIF3C_HUMAN  |
| 8179 | HSSSPLSPGGPHTLTKPTTSSSER2.002E+22                  | sp Q9Y618 NCOR2_HUMAN  |
| 8180 | RSPSPSPTPEAK202000000000                           | sp Q8TAQ2 SMRC2_HUMAN  |
| 8181 | VPVNLLNSPDCDVK20000000                             | sp P33981 TTK_HUMAN    |
| 8182 | RPESPSEISPIKGSVR20200000000000                     | sp Q7Z5K2 WAPL_HUMAN   |
| 8183 | RGEGDAPFSEP GTTSTQRPSSPETATK200000000              | sp Q9UQ35 SRRM2_HUMAN  |
| 8184 | NTADHDESPRPTPGNAPSSSESDIDISSPNVSHDESIK2.00002E+26  | sp Q95251 KAT7_HUMAN   |
| 8185 | YSPTSPTYSPTTPK20000030000000                       | sp P24928 RPB1_HUMAN   |
| 8186 | EAGSPAQEFK20000000                                 | sp Q5JSZ5 PRC2B_HUMAN  |
| 8187 | SSDYQFPSSPFTDTLK2000000000000000                   | sp Q9UK61 F208A_HUMAN  |
| 8188 | AAPEASSPPASPLQHLLPGK2200000000000000               | sp Q96TA1 NIBL1_HUMAN  |
| 8189 | IEEVLSPGSPSKSPSK2000200000200                      | sp Q9UEY8 ADDG_HUMAN   |
| 8190 | TASGSSVTSLDGTR22022000000                          | sp Q92597 NDRG1_HUMAN  |
| 8191 | AGPTLTDENGDGLPPSPGDTSYQDQVDDFHEAR2000000000000000  | sp Q9NQZ2 SAS10_HUMAN  |
| 8192 | SYLEGSSDNQLK20000000                               | sp Q9UHI6 DDX20_HUMAN  |
| 8193 | SLDGAEFRPASVSENHDAGPDGDKR2.0002E+19                | sp Q9H4G0 E41L1_HUMAN  |

|      |                                                            |                       |
|------|------------------------------------------------------------|-----------------------|
| 8194 | RRTPTPPPR20200000                                          | sp Q8IYB3 SRRM1_HUMAN |
| 8195 | GSSDGRGSDSEDLPHR20000000200000000                          | sp Q9UPQ0 LIMC1_HUMAN |
| 8196 | DEPPPLSPAPLTPATPSSLDPFPSR2.00002002E+19                    | sp Q7Z6Z7 HUWE1_HUMAN |
| 8197 | SLSPILPGR20000000                                          | sp Q6ZSZ5 ARHGI_HUMAN |
| 8198 | SDKSPDLAPTPAQSTPR200000000000000000                        | sp Q9BY44 EIF2A_HUMAN |
| 8199 | ELLHSVHPESP NLK200000                                      | sp Q9Y217 MTMR6_HUMAN |
| 8200 | AKTPVTLK2000000                                            | sp P42167 LAP2B_HUMAN |
| 8201 | GEIKDSSPSSSPK20000202000                                   | sp Q6WKZ4 RFIP1_HUMAN |
| 8202 | SYLEGSSDNQLKDESETPVDDR2.000022E+22                         | sp Q9UHI6 DDX20_HUMAN |
| 8203 | DVPPDILLDSPER20000                                         | sp Q6KC79 NIPBL_HUMAN |
| 8204 | HFKDEDEDEDVASPDGLGR20000000                                | sp 095365 ZBT7A_HUMAN |
| 8205 | LSPNPNLTK2000000000                                        | sp P51532 SMCA4_HUMAN |
| 8206 | SDGPASVEGPK2000020000000                                   | sp Q15911 ZFH3_HUMAN  |
| 8207 | AQQQEEQGSVNDVKEEEK20000000000                              | sp Q9Y4W2 LAS1L_HUMAN |
| 8208 | SKSLQLTGK20000000                                          | sp Q9UBS9 SUCC1_HUMAN |
| 8209 | EKWDCESICSTYSLYHPQLIK20022020000000000                     | sp Q96GA3 LTV1_HUMAN  |
| 8210 | GSDYSWSYQTPSSPSSSSSR2002000000000                          | sp Q765P7 MTSSL_HUMAN |
| 8211 | SPTEDFR20200000                                            | sp Q8IXT5 RB12B_HUMAN |
| 8212 | SSSSAAASTPPPGPPADPLGYLPLHGGYQYK2.22E+32                    | sp Q8NDT2 RB15B_HUMAN |
| 8213 | SPSPVQEEHSDPEMTEEEK2.0200000020001E+20                     | sp Q8TF01 PNISR_HUMAN |
| 8214 | MPLLELGGETTPPLSTERSPEAVGSECP SR2E+21                       | sp Q9Y4K1 AIM1_HUMAN  |
| 8215 | LCAGIMITASHNPK200000                                       | sp Q96G03 PGM2_HUMAN  |
| 8216 | AAKPGPAEAPSPTASPSGDASPPATAPYDPR20000000000                 | sp Q9UPT8 ZC3H4_HUMAN |
| 8217 | SPTPKSPPSR20000200000                                      | sp Q9NVD7 PARVA_HUMAN |
| 8218 | SPQRSPLQAESSPTAGK200020020000000                           | sp Q8IWB9 TEX2_HUMAN  |
| 8219 | HRSSDSDLSPPR22020020000                                    | sp Q9BRD0 BUD13_HUMAN |
| 8220 | SPSPDGSPAATPEIR2000000000                                  | sp 000499 BIN1_HUMAN  |
| 8221 | SLGSASPGPGQPPLSSPTR200000                                  | sp Q9C0B5 ZDHC5_HUMAN |
| 8222 | DGTAPPPQSPGSPGTGQDEEWSDEESPRK200000000                     | sp Q9UKS6 PACN3_HUMAN |
| 8223 | RRTSPPPPR20000000                                          | sp Q8IYB3 SRRM1_HUMAN |
| 8224 | RPLSSSHEASEGQAK200000000000                                | sp Q8IZ21 PHAR4_HUMAN |
| 8225 | RRSPSPPTR200000200                                         | sp Q8IYB3 SRRM1_HUMAN |
| 8226 | NALFPEVFSPTPDENSQNSR20000000000200                         | sp Q8IVT2 MISP_HUMAN  |
| 8227 | AQDIIGHHQSEDR20000                                         | sp Q5T200 ZC3HD_HUMAN |
| 8228 | ASEIDQVVPAAQSSPINCEK20000000                               | sp 094782 UBP1_HUMAN  |
| 8229 | RPGGSSPLNAVPCGPPGSEPPR2E+19                                | sp P48634 PRC2A_HUMAN |
| 8230 | TPISPLK20000                                               | sp Q9NQW6 ANLN_HUMAN  |
| 8231 | SLGSASPGPGQPPLSSPTR2E+19                                   | sp Q9C0B5 ZDHC5_HUMAN |
| 8232 | SVGDDEELQQNESGTSPK20000000000000000                        | sp P15822 ZEP1_HUMAN  |
| 8233 | LPSPTSPFSSLSQDQAATSK2200000000000                          | sp Q8WWI1 LMO7_HUMAN  |
| 8234 | IEIPVPTGQSVSPSPSIPGTPTLK2002000000000000                   | sp Q9H4Z3 PCIF1_HUMAN |
| 8235 | DGDSYDPYDFSDTEEMPQVHTPK2000000002000                       | sp P25205 MCM3_HUMAN  |
| 8236 | SSSLKSAQGTGFELGQLSIR2.0002E+20                             | sp Q9C0B5 ZDHC5_HUMAN |
| 8237 | VDGPRSPSYGR2000000                                         | sp Q07955 SRSF1_HUMAN |
| 8238 | MVSQSQPGSR2000200                                          | sp 075122 CLAP2_HUMAN |
| 8239 | EVTPESGPPK200000000                                        | sp P46087 NOP2_HUMAN  |
| 8240 | SSPELTR2000000                                             | sp Q9UQ35 SRRM2_HUMAN |
| 8241 | LPPPPGSPGLHSPTASPPPTAR20000200000000000                    | sp 095785 WIZ_HUMAN   |
| 8242 | SRTASGSSVTSLDGTR20202020000000000                          | sp Q92597 NDRG1_HUMAN |
| 8243 | AVSPPHLDGPPSPRSPVIGSEVFLPNSNHV ASGAGEAER2.000000002002E+38 | sp P29590 PML_HUMAN   |
| 8244 | MANSSPVLSK2000000                                          | sp Q9NXE8 CWC25_HUMAN |
| 8245 | RSPSVSSPEPAEK2020200000000                                 | sp Q9UQ35 SRRM2_HUMAN |
| 8246 | APPAPLAASEVTNSNSAER20000                                   | sp Q9Y2U8 MAN1_HUMAN  |

|      |                                                   |                       |
|------|---------------------------------------------------|-----------------------|
| 8247 | SHMSGSPGPGGSNTAPSTPVIIGGSDKPGMEEK2.002E+19        | sp A0FGR8 ESYT2_HUMAN |
| 8248 | SGSMEEDVDTSPGGDYITSPSSPTSSSR33000200000000        | sp P08651 NFIC_HUMAN  |
| 8249 | SASVNKEPVSLPGIMR2000000000000000                  | sp Q8WWI1 LM07_HUMAN  |
| 8250 | GRSPSPIGVGSEMCR2020000000000000                   | sp Q9Y4B5 MTCL1_HUMAN |
| 8251 | TSFDQDSVDVIFPSDFPTEPPSLPR2.2E+25                  | sp Q02880 TOP2B_HUMAN |
| 8252 | QNGSNDSDRYSDNEEDSKIELK200020000000000000          | sp P42167 LAP2B_HUMAN |
| 8253 | VSDLSLKVQEAESPVK20020000000000000000              | sp Q08357 S20A2_HUMAN |
| 8254 | EREVDEDESEPER200000                               | sp Q53GS9 SNUT2_HUMAN |
| 8255 | GRASSHSSQTQGGGSVTK2200000000000000                | sp P02545 LMNA_HUMAN  |
| 8256 | GRSPSQYHDFAEK2000000000000000                     | sp Q9UGU0 TCF20_HUMAN |
| 8257 | SCFESSPDPELK20002200000000                        | sp Q9UQ35 SRRM2_HUMAN |
| 8258 | TKSLLEEK2000000                                   | sp Q8NFC6 BD1L1_HUMAN |
| 8259 | APPQTHLPSGASSGTGSASATHGGGSPPGTR2E+23              | sp P46379 BAG6_HUMAN  |
| 8260 | SGSALLQSQSSTEDPK2000000                           | sp Q5VTR2 BRE1A_HUMAN |
| 8261 | TPADRGSPAPAPAASPQPGSR2000000020000000             | sp Q8IX07 FOG1_HUMAN  |
| 8262 | APSDSSLGTPSDGRPELR2200000000000000                | sp Q15642 CIP4_HUMAN  |
| 8263 | ELSNSPLRENSFGSPLEFR2000000000002000000            | sp Q9UQ35 SRRM2_HUMAN |
| 8264 | IPLKPSPSK200                                      | sp Q99755 PI51A_HUMAN |
| 8265 | AALLAQYADVTDEEDEADEKDDSGATTMNIIGSDK3E+28          | sp A2A3N6 PIPSL_HUMAN |
| 8266 | APPQTHLPSGASSGTGSASATHGGGSPPGTR2000000            | sp Q96MW1 CCD43_HUMAN |
| 8267 | HDSPDPSPPRR2000200000                             | sp P46379 BAG6_HUMAN  |
| 8268 | GKYSPTVQTR20000000                                | sp Q9BRD0 BUD13_HUMAN |
| 8269 | ADTEGKSPSHSSSNRPFTPPTSTGGSK2E+21                  | sp Q06437 PEPL_HUMAN  |
| 8270 | TFSFSDDENKPPSPK20200000002000                     | sp Q15648 MED1_HUMAN  |
| 8271 | VSTVTSPSR200                                      | sp Q9UHJ3 SMBT1_HUMAN |
| 8272 | EGETQGVAFEHESPADFQNSQSPVQDQDK200000000200000000   | sp Q8WYP5 ELYS_HUMAN  |
| 8273 | NNSNTCNIENELEDNRK2000000000002000                 | sp P78332 RBM6_HUMAN  |
| 8274 | GGSYSQAASSDSAQGSVDVSLTACK3E+21                    | sp Q6PL18 ATAD2_HUMAN |
| 8275 | SPSKPLPEVTDEYKNDVK200000000000000000              | sp P05534 1A24_HUMAN  |
| 8276 | VAESAAAAPQGGPELPPSPAPPEQPAPAPER2E+29              | sp P30447 1A23_HUMAN  |
| 8277 | VNASASSLKK20000                                   | sp P01891 1A68_HUMAN  |
| 8278 | TRHSPTPQQSNR2000000000                            | sp P01892 1A02_HUMAN  |
| 8279 | SPSRPHPGGHPHSSPLAPHPISGDR2.0000000002E+23         | sp Q09160 1A80_HUMAN  |
| 8280 | TPSTPVACSTPAQLK2000000000000000                   | sp P10316 1A69_HUMAN  |
| 8281 | TNPPTQKPPSPPMGR20000000                           | sp P05455 LA_HUMAN    |
| 8282 | IQPAGNTSPR20000                                   | sp Q96N64 PWP2A_HUMAN |
| 8283 | SPLHSSPEKEAPSPEK22000000000000                    | sp Q16658 FSCN1_HUMAN |
| 8284 | LSSLRASTKSESSQK2202000000                         | sp Q8IYB3 SRRM1_HUMAN |
| 8285 | SETSSNPSSPEICPNK2000020000000000                  | sp Q8IY92 SLX4_HUMAN  |
| 8286 | KNSITEISDNEDDLLEYHR200200000000000000             | sp Q6PL18 ATAD2_HUMAN |
| 8287 | YSISLSPPEQQK20000000                              | sp Q8IZP0 ABI1_HUMAN  |
| 8288 | DLHSDNNEEESDEVEDNDNDSEMERPVNR2.0000002E+26        | sp P49674 KC1E_HUMAN  |
| 8289 | KSSVSDAPVHITASGEPVPISEESEELDQK2E+28               | sp Q13459 MYO9B_HUMAN |
| 8290 | GPPSPAPVMHSPSR2000001000000                       | sp P62753 RS6_HUMAN   |
| 8291 | LEQTSVRDPSPEADAPVLGSPEK2000000000000000           | sp Q684P5 RPGP2_HUMAN |
| 8292 | LPEPSVLSEVTKPPPCLENSPPSR2000000                   | sp Q86UU1 PHLB1_HUMAN |
| 8293 | SPSPPLPHIPPEPRTPPFPAK2.02E+23                     | sp Q15057 ACAP2_HUMAN |
| 8294 | DSTSQHDDNISTTSGFSSRASDKDITVSK22200220000000000000 | sp P42568 AF9_HUMAN   |
|      |                                                   | sp O14646 CHD1_HUMAN  |
|      |                                                   | sp Q13573 SNW1_HUMAN  |
|      |                                                   | sp O15234 CASC3_HUMAN |
|      |                                                   | sp Q9BZL4 PP12C_HUMAN |
|      |                                                   | sp Q8IZ21 PHAR4_HUMAN |
|      |                                                   | sp P49790 NU153_HUMAN |

|      |                                                           |                       |
|------|-----------------------------------------------------------|-----------------------|
| 8295 | QPGVDSLSPVASLPK20000000000                                | sp Q9UBW7 ZMYM2_HUMAN |
| 8296 | KTSPASLDFPESQK200000000000                                | sp Q96JM3 CHAP1_HUMAN |
| 8297 | HSTPSNSSNPSGPPSPNSPHR200020020000                         | sp Q9Y5S2 MRCKB_HUMAN |
| 8298 | GTGGSESSRASGLVGR2002002000000                             | sp Q9UH99 SUN2_HUMAN  |
| 8299 | RASPSPPPK20200000                                         | sp Q8IYB3 SRRM1_HUMAN |
|      |                                                           | sp P01891 1A68_HUMAN  |
|      |                                                           | sp P01892 1A02_HUMAN  |
|      |                                                           | sp P05534 1A24_HUMAN  |
| 8300 | GGSYSQAASSDSAQGSVDVSLTACK2000000000                       | sp Q09160 1A80_HUMAN  |
|      |                                                           | sp P10316 1A69_HUMAN  |
|      |                                                           | sp P30447 1A23_HUMAN  |
| 8301 | KAPSASDSKADSDGAKPEPVAMAR2.0200020002E+23                  | sp Q7Z4V5 HDGR2_HUMAN |
| 8302 | VSPSTSYTPSR20000000000                                    | sp Q9BTE3 MCMBP_HUMAN |
| 8303 | SGSIVELIAGGSSCSPVLSR2000000                               | sp P42858 HD_HUMAN    |
| 8304 | GPIHSPVELK2000000                                         | sp Q16649 NFIL3_HUMAN |
| 8305 | VQTTPPPAVQGQK20000000000                                  | sp Q2M2I8 AAK1_HUMAN  |
| 8306 | LRSPSNDSAHR20000000                                       | sp Q5T200 ZC3HD_HUMAN |
|      |                                                           | sp P20020 AT2B1_HUMAN |
| 8307 | SSLYEGLEKPESR2000000000000                                | sp Q01814 AT2B2_HUMAN |
|      |                                                           | sp Q8TAD8 SNIP1_HUMAN |
| 8308 | RPDHSGGSPSPTSEPAR200000000000000                          | sp Q13459 MY09B_HUMAN |
| 8309 | VSPAPGSAPETPEDK2000002000000000                           | sp Q6GYQ0 RGPA1_HUMAN |
| 8310 | SQTPSPSTLNIDHMEQK202020000000010000                       | sp Q9Y2W1 TR150_HUMAN |
| 8311 | SPPSTGTYGSSQKEESAASGGAAYTK2.002E+27                       | sp P50402 EMD_HUMAN   |
| 8312 | RLSPPSSAASSYSFSDLNSTR2.0000000003E+20                     | sp Q15345 LRC41_HUMAN |
| 8313 | SPSAPAAATSSASSSTSSYK200000000000000000                    | sp Q9UGV2 NDRG3_HUMAN |
| 8314 | SRTHSTSSSLGSGESPF222220000000000000                       | sp Q6VMQ6 MCAF1_HUMAN |
| 8315 | QDDDLNCEPLSPHNITPEPVSK20000000000000                      | sp Q9UHB7 AFF4_HUMAN  |
| 8316 | SRSSSPGKQAVSSLNSSH22000000000000000000                    | sp 075420 PERQ1_HUMAN |
| 8317 | SLSVPDSGR20000000                                         | sp 060832 DKC1_HUMAN  |
| 8318 | KRESESEDETPPAAPQLIK2000200200000000000                    | sp Q8NFA0 UBP32_HUMAN |
| 8319 | SPSSLSANI ISSPK200000000020000                            | sp Q9UQ35 SRRM2_HUMAN |
| 8320 | SGSSQELDVKPSASPQER2022000000020000000                     | sp Q8WYA6 CTBL1_HUMAN |
| 8321 | EYAENIGDGRSPEFR200000                                     | sp Q5VTR2 BRE1A_HUMAN |
| 8322 | SGSALLQSSTEDPKDEPAELKPDSEDLSSQSSASK2.2E+27                | sp 060583 CCNT2_HUMAN |
| 8323 | QGQSQAAASSSVTSPIK200000000                                | sp Q96D71 REPS1_HUMAN |
| 8324 | SSSLDMNR2000000                                           | sp Q92597 NDRG1_HUMAN |
| 8325 | SRTASGSSVTSLDGTR22000000000                               | sp P49810 PSN2_HUMAN  |
| 8326 | TSLMSAESPTPR200200200000                                  | sp Q9BXS6 NUSAP_HUMAN |
| 8327 | GRLSVASTPISQR20002000000                                  | sp 094842 TOX4_HUMAN  |
| 8328 | LSTTPSPTSSLHEDGVEDFR20220000000000000                     | sp 075367 H2AY_HUMAN  |
| 8329 | AASADSTTEGTPADGFTVLSTK20020000000000000                   | sp Q9NUW8 TYDP1_HUMAN |
| 8330 | WTISSSESEEEKPKPKPSTSLLCAR2.0222E+27                       | sp Q8WYP5 ELYS_HUMAN  |
| 8331 | STPLASPSPPGRSPQR200020000                                 | sp Q92609 TBCD5_HUMAN |
| 8332 | EFTGSPSSATK20000000000                                    | sp Q6ZRV2 FA83H_HUMAN |
| 8333 | RSQSSSQGDNPLAPGYLPPHYK2.22E+19                            | sp Q86VM9 ZCH18_HUMAN |
| 8334 | DSGSDQDLGAGVR2000000000000                                | sp P11388 TOP2A_HUMAN |
| 8335 | FTMDLSDSEDFDFDEKTDDEDFVPSDASPPK1.000200002E+30            | sp Q96I25 SPF45_HUMAN |
| 8336 | SPTGPSNSFLANMGTVAHK2000000000100000000                    | sp 076021 RL1D1_HUMAN |
| 8337 | AAESETPGKSPEKKPK20000000                                  | sp P62753 RS6_HUMAN   |
| 8338 | LSSLRASSTKSESSQK22202000000                               |                       |
| 8339 | LSSDENSNPDLSGDENDDAVSIESGTNTERPDTPTNPNAPGR2.000000002E+32 | sp 075530 EED_HUMAN   |
| 8340 | LSPQMQRVHDK20000000000                                    | sp Q12830 BPTF_HUMAN  |
| 8341 | SAGGSSPEGGEDSDREDGNYCPPVK2.2E+21                          | sp Q9H6Z4 RANB3_HUMAN |

|      |                                                     |                       |
|------|-----------------------------------------------------|-----------------------|
| 8342 | APSASDSKADSDGAKPEPVAMAR2.0202000002E+23             | sp Q7Z4V5 HDGR2_HUMAN |
| 8343 | SFSKEVEER2020000000                                 | sp Q04637 IF4G1_HUMAN |
| 8344 | NSSTPGLQVPVSPTVPIQNQK2.2E+19                        | sp Q03164 KMT2A_HUMAN |
| 8345 | SSSVGSSSSYPISPAVSR220002000000                      | sp Q15149 PLEC_HUMAN  |
| 8346 | SLVHEVGKPPQDVTDDSPSK200000000                       | sp Q96T58 MINT_HUMAN  |
| 8347 | KRESESEDETPPAAPQLIK200000000000000000               | sp 060832 DKC1_HUMAN  |
| 8348 | LVKPSSSSSGSR20000                                   | sp Q9H6B4 CLMP_HUMAN  |
| 8349 | CQTAEADSESDHEVPEPESEM2020000000000100               | sp Q9BPX3 CND3_HUMAN  |
| 8350 | DEPPPASQSTSQDCSQALKQSP200                           | sp Q5JRA6 MIA3_HUMAN  |
| 8351 | RFSFSQR200000                                       | sp Q92614 MY18A_HUMAN |
| 8352 | ADTEGKSPSHSSSNRPFTPPTSTGGSK2.02E+21                 | sp Q15648 MED1_HUMAN  |
| 8353 | LSPPHSPR20002000                                    | sp Q92974 ARHG2_HUMAN |
| 8354 | LPHSSSENK2000000                                    | sp Q76I76 SSH2_HUMAN  |
| 8355 | SPQGSPVLAEDSEGEG2000000200000                       | sp Q99638 RAD9A_HUMAN |
| 8356 | SFSSSAEEHS200000000                                 | sp Q96EQ0 SGTB_HUMAN  |
| 8357 | DNTFFRESPVGR200000                                  | sp Q8NEY8 PPHLN_HUMAN |
| 8358 | RSSGFISELPSEEGK20000000000000                       | sp Q5VZK9 LR16A_HUMAN |
| 8359 | IEEAMDGSETPQLFTVLPEK200000000000                    | sp Q13435 SF3B2_HUMAN |
| 8360 | TSPTVATQTGASATSTR200000000000000000                 | sp Q6P1L5 F117B_HUMAN |
| 8361 | NSSLGSPNLCGSPPGSIR20000000                          | sp Q9C0B0 UNK_HUMAN   |
| 8362 | ETSVSKEDTDHEEKASNEVDTK2.0000000000002E+21           | sp 075475 PSIP1_HUMAN |
| 8363 | LTRPAASPAVGEK20000000                               | sp Q8N2M8 CLASR_HUMAN |
| 8364 | RLPSSPASPSPK2000200000                              | sp Q9H4G0 E41L1_HUMAN |
| 8365 | SPISELHSAPLTPVAR200200000000000000                  | sp Q7Z3B3 KANL1_HUMAN |
| 8366 | ATVTPSPVK2020000                                    | sp Q9H1E3 NUCKS_HUMAN |
| 8367 | NGSLDSPGKQDTEDEEDEKDK200000200000000000             | sp Q9Y266 NUDC_HUMAN  |
| 8368 | SCDELSPVSPTQGGYPSEPTR2000000000000000               | sp Q9HCD6 TANC2_HUMAN |
| 8369 | SPQRSPLQSAESSPTAGK200020000000000000                | sp Q8IWB9 TEX2_HUMAN  |
| 8370 | TEEARPSPAPGPGTPTGTPTTR200020000                     | sp Q4KMP7 TB10B_HUMAN |
| 8371 | SSPINPAQSGSPNHVDSAYFPGSSTSSSSDNDEGSGGATNHISGNK2E+45 | sp Q9NZB2 F120A_HUMAN |
| 8372 | NTFTAWSDEESDYEIDDRDVK2.0000002E+19                  | sp Q6PKG0 LARP1_HUMAN |
| 8373 | GDTPGHATPGHGATSSAR20000000000000                    | sp 075533 SF3B1_HUMAN |
| 8374 | RPSVASSVSEEFYFEVR2002202000000000                   | sp A6ND36 FA83G_HUMAN |
| 8375 | SRPLATGPSSQSHQEK20000000                            | sp Q96RL1 UIMC1_HUMAN |
| 8376 | NTPSQHSHSIQHSPER2000000200020000                    | sp Q9NYF8 BCLF1_HUMAN |
| 8377 | TSFDQDSVDVIFPSDFPTEPPSLPR2E+24                      | sp Q02880 TOP2B_HUMAN |
| 8378 | KVDEGAGDAAVASGGAQTLALAGSPAPSGHPK2000000000          | sp Q9NZT2 OGFR_HUMAN  |
| 8379 | SAPASPTHPLMSPR2000200000012000                      | sp P85037 FOXK1_HUMAN |
|      |                                                     | sp P05534 1A24_HUMAN  |
|      |                                                     | sp P30447 1A23_HUMAN  |
| 8380 | GGSYSQAASSDSAQGSVDVSLTACKV2000200000000000          | sp P01891 1A68_HUMAN  |
|      |                                                     | sp P01892 1A02_HUMAN  |
|      |                                                     | sp Q09160 1A80_HUMAN  |
|      |                                                     | sp P10316 1A69_HUMAN  |
| 8381 | SASSNSRKSLSPGVSR202202002020000000                  | sp Q9UKV3 ACINU_HUMAN |
| 8382 | HADGEKEDQFNGSPPRPQPR2000000000                      | sp Q69YN4 VIR_HUMAN   |
| 8383 | RSSIGLR200000                                       | sp Q96GN5 CDA7L_HUMAN |
| 8384 | HSDSGTSEASLSPSSPPSRPR200200000000                   | sp Q7Z4S6 KI21A_HUMAN |
| 8385 | ERPTSPAPHRPPK2000000000                             | sp Q8N6T7 SIR6_HUMAN  |
| 8386 | ETPHSPGVEDAPIAK2000000000000000                     | sp Q9UHB6 LIMA1_HUMAN |
| 8387 | DFLSGPDYDHVTGSDSEDEEVEGEP3.00000002E+20             | sp Q6ZW31 SYDE1_HUMAN |
| 8388 | SSGHSSSELSPDAVEK220002200200000000                  | sp Q9UQ35 SRRM2_HUMAN |
| 8389 | ASPSPPPKR202000000                                  | sp Q8IYB3 SRRM1_HUMAN |
| 8390 | AGLSPANCSDR2000000000                               | sp Q14692 BMS1_HUMAN  |

|      |                                                 |                       |
|------|-------------------------------------------------|-----------------------|
| 8391 | VSDSESEGPQK2020000000                           | sp Q96ST2 IWS1_HUMAN  |
| 8392 | KAPSASDSDSKADSDGAKPEPVAMAR2.0202020002E+23      | sp Q7Z4V5 HDGR2_HUMAN |
| 8393 | SISLGDSEGPVATLAQPLR2E+20                        | sp O43379 WDR62_HUMAN |
| 8394 | GGPGKLSR2000                                    | sp Q12888 TP53B_HUMAN |
| 8395 | TSPTTPEASATNSPCTSKPATPAPSEK2000000000000000     | sp Q12873 CHD3_HUMAN  |
| 8396 | HKSGSMEEDVDTSPGGDYITSPSSPTSSSR30000020000000    | sp P08651 NFIC_HUMAN  |
| 8397 | ILEGPQQSLSGSPLQPIPASPPPQIPPGLRPR2.00000002E+21  | sp O15446 RPA34_HUMAN |
| 8398 | GSSDGRGSDSEDLPHR200000000                       | sp Q9UPQ0 LIMC1_HUMAN |
| 8399 | SDELLGSDSDSHDGESESNAK200200002000000            | sp P38398 BRCA1_HUMAN |
| 8400 | DWDKESDGPDDSRPESASDSDT200000000020200000        | sp Q9Y3B9 RRP15_HUMAN |
| 8401 | HQYSDYDYHSSSEK202000                            | sp Q9UDY2 ZO2_HUMAN   |
| 8402 | ESPSPAPKPR2020000000                            | sp Q8IYB3 SRRM1_HUMAN |
| 8403 | GDAASSPAPAASVGSSQGGAR200000000000000000         | sp Q8WVB6 CTF18_HUMAN |
| 8404 | LSSPIDMTSK2000000000                            | sp Q16649 NFIL3_HUMAN |
| 8405 | DDSHAEDSEDEKEDHK2020002000000000                | sp Q9H1E3 NUCKS_HUMAN |
| 8406 | DGSDYDPYDFSDTEEMPQVHTPK2.0003E+21               | sp P25205 MCM3_HUMAN  |
| 8407 | SPQTLAPVGEDAMKTPSPAAEDAREPEAK102020000000000000 | sp Q92797 SYMPK_HUMAN |
| 8408 | SPSVSPEPAEK20202000000000                       | sp Q9UQ35 SRRM2_HUMAN |
| 8409 | QQAAYYAQTSPQGMPPHPPAPQGQ2000100000000000        | sp Q96AE4 FUBP1_HUMAN |
| 8410 | LSEDEEEDEAEDDQSEASGKK2.20000000000002E+21       | sp Q8NEJ9 NGDN_HUMAN  |
| 8411 | FSPGAPGSGSQPNQK2000000200000000                 | sp Q15942 ZYX_HUMAN   |
| 8412 | LSPERSDSESNENEPHLPHGVSQR2.000000002E+24         | sp Q9BQ52 RNZ2_HUMAN  |
| 8413 | SSSKGSVEEIMSQPK2200200000000000                 | sp Q8IWB9 TEX2_HUMAN  |
| 8414 | SRSPSPELNNK20202200000000                       | sp Q9UQ35 SRRM2_HUMAN |
| 8415 | ARSRTPPSAPSQSR20200000000000                    | sp Q9UQ35 SRRM2_HUMAN |
| 8416 | YTPTSPSYSPSSPEYTPTSPK3.00000000002E+21          | sp P24928 RPB1_HUMAN  |
| 8417 | KPPAPSPVQSQSPSTNWSPAVPVKK2.000202E+20           | sp Q8IYB3 SRRM1_HUMAN |
| 8418 | DLESCDDDNQGSKSPK202000000002000                 | sp Q5T3I0 GPTC4_HUMAN |
| 8419 | SHLSQHTATSSK2000000000                          | sp P49790 NU153_HUMAN |
| 8420 | SPSESPQHIAHPER20000000000000                    | sp Q68DK2 ZFY26_HUMAN |
| 8421 | TIDLGAAHYTGDKASPDQNASTHTPQSSVK2000000000000000  | sp Q14677 EPN4_HUMAN  |
| 8422 | TNSDSALHQSTMTPTQPESFSSGSQDVHQK2.0000001E+26     | sp Q6UUU9 CRTC1_HUMAN |
| 8423 | KADTEGKSPSHSSNRPFPTSTGGSK2.02E+21               | sp Q15648 MED1_HUMAN  |
| 8424 | LVEDERSDR2000                                   | sp Q96G23 CERS2_HUMAN |
| 8425 | RRSDEDAAGEPK220000000000                        | sp Q9BUI4 RPC3_HUMAN  |
| 8426 | ASPEENNAGGGSPSSGGNPTNTSGTTR200000000000000000   | sp Q9NRH2 SNRK_HUMAN  |
| 8427 | GPSPAAASPEGSPLR200020000                        | sp Q9P107 GMIP_HUMAN  |
| 8428 | QLSSTSPLAYPYSQMVSSDR200000000000000000          | sp Q6UUU7 CRTC3_HUMAN |
| 8429 | SDSYVELSQYR2000000000                           | sp P52298 NCBP2_HUMAN |
| 8430 | SQDATFSPGSEQAEKSPGPIVSR2000002000000000         | sp Q86WB0 NIPA_HUMAN  |
| 8431 | SPISPSELHSAPLTPVAR2000000000000200000           | sp Q7Z3B3 KANL1_HUMAN |
| 8432 | SSPSARPPDVPGQPQAAK200000000000000000            | sp Q96JP5 ZFP91_HUMAN |
| 8433 | GGNVFAALIQQSEEEEEEEKHPPKPAKPEK2E+19             | sp Q8NE71 ABCF1_HUMAN |
| 8434 | HNFLFEDNMALPSESVSLLTDLKPPTGSNQASPAR2.02E+23     | sp Q9BZQ8 NIBAN_HUMAN |
| 8435 | MGQAPSQSLLPPAQDQPRSPVPSAFSDQSR200000000000      | sp Q9UQ35 SRRM2_HUMAN |
| 8436 | YHGHSMSDPGVSYR2000000000                        | sp P08559 ODPA_HUMAN  |
| 8437 | RPTETNPVTSNSDEECNETVK20020000000000             | sp P29803 ODPAT_HUMAN |
| 8438 | DPNSATATAPPSPLKR200000                          | sp P46100 ATRX_HUMAN  |
| 8439 | DLELPSQEAPSFQGTESPKPCK2000000                   | sp Q92766 RREB1_HUMAN |
| 8440 | APAASEGNHTDGAEAAAGSCAQAPSHSPPNKPK20000000       | sp Q6PJF5 RHDF2_HUMAN |
| 8441 | MQAGQISVQSSEPSSPEPGK2000000                     | sp Q92560 BAP1_HUMAN  |
| 8442 | SPLQSAESSPTAGK200000002000000                   | sp P37275 ZEB1_HUMAN  |
| 8443 | FHSSDSEEEHK2020000000                           | sp Q8IWB9 TEX2_HUMAN  |
|      |                                                 | sp Q96ST2 IWS1_HUMAN  |



|      |                                                |                       |
|------|------------------------------------------------|-----------------------|
| 8444 | ESSLPSK200000                                  | sp 075477 ERLN1_HUMAN |
| 8445 | SNSSEAVLGQEELSAQAK200000000000000000           | sp Q9BXF6 RFIP5_HUMAN |
| 8446 | VLQSDSETEDTNASPEK2020000020000                 | sp Q9HAW4 CLSPN_HUMAN |
| 8447 | VEAKEESESEDEDMGFGLFD2002000000000000           | sp Q8NHW5 RLAOL_HUMAN |
| 8448 | SQSWEER200000                                  | sp P05388 RLAO_HUMAN  |
| 8449 | ALSGGGSVASPPSPAMPK20002000000                  | sp Q6Y7W6 PERQ2_HUMAN |
| 8450 | KPGDGEVSPSTEDAPFQHSPLGK20000000000200000       | sp 075420 PERQ1_HUMAN |
| 8451 | SYSPDGKESPSDK200000002000                      | sp 060318 GANP_HUMAN  |
| 8452 | LVKPSSSSSGSR200200                             | sp P43243 MATR3_HUMAN |
| 8453 | AHSPAEGASVESSSPGPK20000000002000000            | sp Q9H6B4 CLMP_HUMAN  |
| 8454 | SPTVLCQK2000000                                | sp Q8NFG4 FLCN_HUMAN  |
| 8455 | ASAGTPSLSAGVSPK2000                            | sp Q5VUA4 ZN318_HUMAN |
| 8456 | QLPALDGLMGPESPPAQEEEEAPVSPHK1.0002E+19         | sp Q8TEK3 DOT1L_HUMAN |
| 8457 | TPTSSPASSPLVAK2020000000000                    | sp Q8N9T8 KRI1_HUMAN  |
| 8458 | TLENSPISSCDTSDTEGVPVNSAAVLK2.200220E+21        | sp Q14684 RRP1B_HUMAN |
| 8459 | GESAEDKEHEEGRDSEEGPR2000000                    | sp Q8N556 AFAP1_HUMAN |
| 8460 | LNSSVLVPYGAESSEDSDEESKGLGK30000200200000000000 | sp Q7Z4V5 HDGR2_HUMAN |
| 8461 | DGELPVEDDIDLSDVELDDLKDEL200000000000000        | sp Q9H9J4 UBP42_HUMAN |
| 8462 | EPTPSIASDISLPIATQELR2020020000000000000        | sp Q15084 PDIA6_HUMAN |
| 8463 | DYTGCTSESLSPVK200000000                        | sp A0FGR8 ESYT2_HUMAN |
| 8464 | SGSYSLEER200000000                             | sp 095297 MPZL1_HUMAN |
| 8465 | ESSPIPSPTSDRK200020000000                      | sp 014974 MYPT1_HUMAN |
| 8466 | SRSPYSPVLR20203000000                          | sp Q01082 SPTB2_HUMAN |
| 8467 | KSEDGTPAEDGTPAATGGSQPPSMGR2000000000000000     | sp Q14004 CDK13_HUMAN |
| 8468 | SLVESVSSSPNK20000                              | sp Q9BQG0 MBB1A_HUMAN |
| 8469 | SRSRSPPVSK2020000000                           | sp Q9H2U2 IPYR2_HUMAN |
| 8470 | MALPPQEDATASPPR2000000                         | sp Q01130 SRSF2_HUMAN |
| 8471 | RPPTPCSDPER200000                              | sp Q9UQ35 SRRM2_HUMAN |
| 8472 | SRYRSPYSR20000200                              | sp Q9BW71 HIRP3_HUMAN |
| 8473 | EPTSVSENEGISTIPSPVTSPLSR2E+23                  | sp Q9BRL6 SRSF8_HUMAN |
| 8474 | DSSVPGSPSSIVAK200020000000                     | sp Q8NEL9 DDHD1_HUMAN |
| 8475 | NPSDSAVHSPFTK200000                            | sp Q08495 DEMA_HUMAN  |
| 8476 | LSGEHSESSTPRPR2000000000                       | sp Q14157 UBP2L_HUMAN |
| 8477 | QSPGSTSPKPPHTLSR2000000000000000               | sp Q7Z3K3 POGZ_HUMAN  |
| 8478 | EEAPASPLRPLYPQISPLK300020000                   | sp 043159 RRP8_HUMAN  |
| 8479 | SSSSLGSGSSRDSISSDSETSEPLSCR2.2E+26             | sp P85037 FOXK1_HUMAN |
| 8480 | SPDLAPTAPQSTPR2000000000000000                 | sp 075164 KDM4A_HUMAN |
| 8481 | FELLTPPLSPSR200020000                          | sp Q9BY44 EIF2A_HUMAN |
| 8482 | LTPSPDIIVLSDNEASSPR2000002000                  | sp P01106 MYC_HUMAN   |
| 8483 | VELKSEANDAVNSSTK2000000020000                  | sp P04198 MYCN_HUMAN  |
| 8484 | SESSDFEVVPK202000000000                        | sp Q8WXI9 P66B_HUMAN  |
| 8485 | EGAASPAPETPQPTSPETSPK20002000                  | sp 015234 CASC3_HUMAN |
| 8486 | YQDEVFGGFVTEPQEESEEEVEEPEER200000000000000000  | sp Q9Y520 PRC2C_HUMAN |
| 8487 | TSPLKDNPSPEPQLDDIKR2.2E+19                     | sp Q9Y3X0 CCDC9_HUMAN |
| 8488 | APSPSGLMSPSR20000000000                        | sp Q13283 G3BP1_HUMAN |
|      |                                                | sp Q96JC9 EAF1_HUMAN  |
|      |                                                | sp Q9P1Y5 CAMP3_HUMAN |

|      |                                                              |                       |
|------|--------------------------------------------------------------|-----------------------|
|      |                                                              | sp P30504 1C04_HUMAN  |
|      |                                                              | sp Q9TNN7 1C05_HUMAN  |
|      |                                                              | sp P04222 1C03_HUMAN  |
|      |                                                              | sp Q07000 1C15_HUMAN  |
|      |                                                              | sp Q29865 1C18_HUMAN  |
| 8489 | GGSCSQAASSNSAQGSDESLIACK2E+20                                | sp Q29960 1C16_HUMAN  |
|      |                                                              | sp Q29963 1C06_HUMAN  |
|      |                                                              | sp P30505 1C08_HUMAN  |
|      |                                                              | sp P30508 1C12_HUMAN  |
|      |                                                              | sp P30510 1C14_HUMAN  |
|      |                                                              | sp Q95604 1C17_HUMAN  |
| 8490 | AKPSPAPPSTTTAPDASGPQK200000000000000000                      | sp P40855 PEX19_HUMAN |
| 8491 | SPAPGLASGDRPPSVSSVHSEGCNR2E+26                               | sp Q9Y618 NCOR2_HUMAN |
| 8492 | VSITSEVESTSNPSSSSLQK202000000000                             | sp Q04656 ATP7A_HUMAN |
| 8493 | SGTPPRQGSITSPQANEQSVTPQR20220000002000000                    | sp Q9UQ35 SRRM2_HUMAN |
| 8494 | DDPSDVTDEDEGPAEPPPPKLPAPFR2.002E+25                          | sp Q3YEC7 RABL6_HUMAN |
| 8495 | SSSPIPLTPSK2000020000                                        | sp Q8N5Y2 MS3L1_HUMAN |
| 8496 | SSTPSSPTGTSSSDSGGHHIGWGER2E+25                               | sp P46019 KPB2_HUMAN  |
| 8497 | GLEGNANSPAHLR2000000                                         | sp Q8NFC6 BD1L1_HUMAN |
| 8498 | TPTSSPASSPLVAK20000000000                                    | sp Q14684 RRP1B_HUMAN |
| 8499 | GNIETTSDEGQVFSFK2000                                         | sp Q5T200 ZC3HD_HUMAN |
| 8500 | SPSESSPQHPTPPARPR200020000000000000                          | sp O14733 MP2K7_HUMAN |
| 8501 | SPSPLGTSVR200000000000                                       | sp Q86SQ0 PHLB2_HUMAN |
| 8502 | ILGQSSPEKK200000                                             | sp P29374 ARI4A_HUMAN |
| 8503 | RGSVSSVSPKPPSSFK2002000000000000                             | sp Q9NZJ0 DTL_HUMAN   |
| 8504 | GLSSAGGSPHREDAQPEHSASAR200000000000000000                    | sp Q92994 TF3B_HUMAN  |
| 8505 | DLSTSPKPSPIPSPVLR2000000002000000                            | sp Q8NDI1 EHBP1_HUMAN |
| 8506 | RLSSLRASTSK2200002000                                        | sp P62753 RS6_HUMAN   |
| 8507 | NKIEEAPEATPQSPQPGPSSPISLSAEEENAEGEVSRR2002020000000000000000 | sp Q9H4L7 SMRCD_HUMAN |
| 8508 | SITSTPLSGK20002000000                                        | sp Q9P0K7 RAI14_HUMAN |
| 8509 | QQAAYYAQTSPQGMPPAPQGG200001000000000000                      | sp Q96AE4 FUBP1_HUMAN |
| 8510 | LSSPPLR200000                                                | sp Q96ET8 TV23C_HUMAN |
| 8511 | FAFSPLSEEEEEDEQKEPMLK20000000000000000000                    | sp Q8NBN3 TM87A_HUMAN |
| 8512 | ISLEQPPNGSDTPNPEK2000000                                     | sp Q9UHI6 DDX20_HUMAN |
| 8513 | SSSKDSRPSQAAGDNQGDEAK2E+19                                   | sp Q9Y2W1 TR150_HUMAN |
| 8514 | ICSIYTSQGENSLVQEGSEASPIGK200000                              | sp Q9Y4W2 LAS1L_HUMAN |
| 8515 | LASELSFDFR200000                                             | sp Q9Y4K4 M4K5_HUMAN  |
| 8516 | AKSPTSPSPPRNSDQEGGGK2.020202E+19                             | sp Q8IYB3 SRRM1_HUMAN |
| 8517 | THSTSSSLGSGESPFRR200000000000                                | sp Q9UGV2 NDRG3_HUMAN |
| 8518 | SLGGESSGTTVPVGSFHTEAAR200200000000000000                     | sp O15085 ARHGB_HUMAN |
| 8519 | EKEVDGLLTSEPMGSPVSSK102000000                                | sp Q8WWM7 ATX2L_HUMAN |
| 8520 | ALMDEEDMDDVVDADAYLIPQQGFFSSPSTSR2000000                      | sp P00533 EGFR_HUMAN  |
| 8521 | TVGTPIASVPGSTNTGTVPGSEK2E+23                                 | sp Q99460 PSMD1_HUMAN |
| 8522 | TPTSSPASSPLVAK20022000000                                    | sp Q14684 RRP1B_HUMAN |
| 8523 | SRPTSEGSDIESTEPQK2200000000000000                            | sp Q4G0J3 LARP7_HUMAN |
| 8524 | KHSPSPPTPTESR2000000000000000                                | sp Q92922 SMRC1_HUMAN |
| 8525 | EAASSSGTQPAPPAPASPWDSSK20000000                              | sp Q9H7N4 SFR19_HUMAN |
| 8526 | GESAADSDGWSAPSDLR200000000000000000                          | sp Q9BUL5 PHF23_HUMAN |
| 8527 | TSAVSSPLLDQQR20000000000                                     | sp Q5T200 ZC3HD_HUMAN |
| 8528 | SGAHSSASPPR20000                                             | sp P18615 NELFE_HUMAN |
| 8529 | LDSPTMSR2000000                                              | sp P19634 SL9A1_HUMAN |
| 8530 | TDESSPVLSPR20002000                                          | sp Q8NA72 POC5_HUMAN  |
| 8531 | SRSPTPPSSAGLGSNSAPPIDSR2.002200002E+20                       | sp Q8IWX8 CHERP_HUMAN |

|      |                                                    |                       |
|------|----------------------------------------------------|-----------------------|
| 8532 | SSTGPEPPAPTPLLAER2000000000000000                  | sp Q9UQ35 SRRM2_HUMAN |
| 8533 | ATHGSNSLPSSAR20000000                              | sp Q8TDM6 DLG5_HUMAN  |
| 8534 | ESKEEETSIDVAGKPNEVTK2000000000000000               | sp P53985 MOT1_HUMAN  |
| 8535 | QNSDDEEQQLSDEEK20000000200000                      | sp Q8WVC0 LEO1_HUMAN  |
| 8536 | DSSSTDSANEKPALIPR2200000000000000                  | sp Q9NUQ6 SPS2L_HUMAN |
| 8537 | GPQPPTVSPIR20000                                   | sp P46087 NOP2_HUMAN  |
| 8538 | SPSAISTGTLVSK20000000000000                        | sp Q9NR48 ASH1L_HUMAN |
| 8539 | LTQAEISEQPTMATVVPQVPTSPK10000000002000             | sp Q70E73 RAPH1_HUMAN |
| 8540 | HLAQASQELQ200000                                   | sp Q8NBP7 PCSK9_HUMAN |
| 8541 | SPVSPLAAGIPLPAQLTK2E+19                            | sp Q96SI1 KCD15_HUMAN |
| 8542 | VETVSPSESPK200002000                               | sp Q99590 SCAFB_HUMAN |
| 8543 | KAPSASDSKADSDGAKPEPVAMAR2.0002020002E+23           | sp Q7Z4V5 HDGR2_HUMAN |
| 8544 | SFSEHDLAQLR2000000000                              | sp Q8WWL2 SPIR2_HUMAN |
| 8545 | KSDGACDPSSSDKENSSQIAQDHQK20000000020000000000      | sp Q9UIG0 BAZ1B_HUMAN |
| 8546 | RNSNSPPSPSSMNQR20200200010000                      | sp Q7Z5L9 I2BP2_HUMAN |
| 8547 | GSLAEAVGSPPAATPTPTPTR2000002000000000              | sp Q9Y6I3 EPN1_HUMAN  |
| 8548 | RQSSGSATNVASTPDNR2000200000000000                  | sp Q7Z460 CLAP1_HUMAN |
| 8549 | DPLSSPGGPGSR2000000000                             | sp Q32P44 EMAL3_HUMAN |
| 8550 | SVSSNVASVSPIPAGSK2000000000                        | sp Q9Y6G9 DC1L1_HUMAN |
| 8551 | SNTPESIAETPPAR200000000200000                      | sp Q9Y4H2 IRS2_HUMAN  |
| 8552 | KRTPSVGK2020000                                    | sp P46013 KI67_HUMAN  |
| 8553 | IQNSDDEER20000000                                  | sp Q8WVC0 LEO1_HUMAN  |
| 8554 | RRSFSISPSR202020000                                | sp P18583 SON_HUMAN   |
| 8555 | GSGGSSGDELREDDEPVK2200000000000000                 | sp Q7Z4V5 HDGR2_HUMAN |
| 8556 | YTPTSPSYSPSSPEYTPSPK220030000000                   | sp P24928 RPB1_HUMAN  |
| 8557 | DSPGIPPSAGAHQLFR20000020000000000                  | sp Q15418 KS6A1_HUMAN |
| 8558 | TNSGISSASGGSTEPTTPDSEPAQALLR2000000000000000       | sp Q86X10 RLGPB_HUMAN |
| 8559 | LQEEQDGGSSDEDR2200000                              | sp Q14147 DHX34_HUMAN |
| 8560 | RKSEDGTPAEDGTPAATGGSQPPSMGR2000000000000000        | sp Q9BQG0 MBB1A_HUMAN |
| 8561 | AVTTVTQSTPVGPSVPPPEELQVSPGPR2E+27                  | sp P51610 HCFC1_HUMAN |
| 8562 | IFDEVMGCFSDSPQSPTFPEAGHTSLYDEDKVR2.000002E+24      | sp Q13085 ACACA_HUMAN |
| 8563 | SPPKSPPEEGAVSS2000000000000020                     | sp Q01130 SRSF2_HUMAN |
| 8564 | AVGMPSPVSPK2002000                                 | sp Q9UHB7 AFF4_HUMAN  |
| 8565 | GSQHSPTRPVAAAAASLGLPGGAAR2E+22                     | sp Q86VQ1 GLC11_HUMAN |
| 8566 | YSPTSPTYSPVYTPSPK3002000000000000                  | sp P24928 RPB1_HUMAN  |
| 8567 | TPTPSTPGDTQNPAPVPPAEDGIK2E+24                      | sp Q14839 CHD4_HUMAN  |
| 8568 | NMVDLVNTHHLHSSDDEDDLK1.000000000022E+22            | sp Q9UPN7 PP6R1_HUMAN |
| 8569 | LMLSTSEYSQSPK3002000                               | sp Q12888 TP53B_HUMAN |
| 8570 | KFDHESPGETDEKSG220020000200                        | sp Q13427 PIG_HUMAN   |
| 8571 | SSSSDSIHSVR200000000000                            | sp Q8WYL5 SSH1_HUMAN  |
| 8572 | SLTRSPPAIR20002000000                              | sp Q9UQ35 SRRM2_HUMAN |
| 8573 | DLFETGLEDENNSPLEDEESLESIR2E+21                     | sp Q9HAW4 CLSPN_HUMAN |
| 8574 | VQMTSPSSTGSPMFK10200000000000                      | sp P49790 NU153_HUMAN |
| 8575 | GLNSQSSDHLNKR2200000000                            | sp A8CG34 P121C_HUMAN |
| 8576 | GHVTPNLSR2000200                                   | sp Q96HA1 P121A_HUMAN |
| 8577 | TESVSDKEDKPLAPSGGTEGPEQPPPCPSQTGSPPVGLIK2000000000 | sp Q96CP6 GRM1A_HUMAN |
| 8578 | STGVSWFTQSDENEQEQQSDTEEGSNKK2.000000002E+19        | sp Q8WWM7 ATX2L_HUMAN |
| 8579 | QLSALSSDGEQGGRPVPR20000000000000                   | sp O14974 MYPT1_HUMAN |
| 8580 | ESEDSETQPFDTHEAYGPCLSPPR2E+24                      | sp O15438 MRP3_HUMAN  |
| 8581 | VEPSSQSPGRSPR20000000                              | sp Q14676 MDC1_HUMAN  |
| 8582 | VVNITSPGHDAASSRPTTASVSATAAPR22000000000000000000   | sp Q8IUD2 RB6I2_HUMAN |
| 8583 | SKSEEHAEDSVMDHHR200000000                          | sp Q15723 ELF2_HUMAN  |
| 8584 | GDDDEESDEEAVK20000000                              | sp Q8NC51 PAIRB_HUMAN |
|      |                                                    | sp O43395 PRPF3_HUMAN |

|      |                                                       |                       |
|------|-------------------------------------------------------|-----------------------|
| 8585 | AASLTEDRDR200000000                                   | sp Q04637 IF4G1_HUMAN |
| 8586 | IQFKPDDGISPER20000                                    | sp Q96I24 FUBP3_HUMAN |
| 8587 | SAGGSSPEGGEDSDREDGNYCPPVK2.000220000002E+25           | sp Q9H6Z4 RANB3_HUMAN |
| 8588 | AYLGYQAVPSGSSGSLSTSSSSSPPGTPSPADAK2E+25               | sp P17676 CEBPB_HUMAN |
| 8589 | EHAPLASPVENK2000000                                   | sp Q9ULJ3 ZBT21_HUMAN |
| 8590 | HKQSPGHQDSDSDLSPPR2000002020020000                    | sp Q9BRD0 BUD13_HUMAN |
| 8591 | AYLGYQAVPSGSSGSLSTSSSSSPPGTPSPADAK200000000           | sp P17676 CEBPB_HUMAN |
| 8592 | VESVEPSENEASK200020000000                             | sp Q9H307 PININ_HUMAN |
| 8593 | SDGACDSPSSDKENSSQIAQDHQK2000000002000000000           | sp Q9UIG0 BAZ1B_HUMAN |
| 8594 | KASVVDPSTESSPAPQEGSEQPASPASPLSSR2000020000000000      | sp Q66K14 TBC9B_HUMAN |
| 8595 | KEKTPELPEPSVK20000000000                              | sp Q8IYB3 SRRM1_HUMAN |
| 8596 | TIASDSEEEAGKELSDK2000020000000000000                  | sp Q96ST2 IWS1_HUMAN  |
| 8597 | RGSSAAASPGSPPPGR200000002000000                       | sp Q86UX6 ST32C_HUMAN |
| 8598 | SSSISEEKGSDDEKPR200000000020000000                    | sp Q9UKV3 ACINU_HUMAN |
| 8599 | SESARGSDSEDEVLR2020000020000000                       | sp Q8WVC0 LEO1_HUMAN  |
| 8600 | SRSPSPELNNK20220000000                                | sp Q9UQ35 SRRM2_HUMAN |
| 8601 | EVEEDSEDEEMSEDEEDSSGEEVVIPQKK1.200000022E+20          | sp P19338 NUCL_HUMAN  |
| 8602 | IEEQELSENTSLPAEEANGSLSEEEANGPELGSGK2.000000000002E+26 | sp Q9BUR4 WAP53_HUMAN |
| 8603 | SVELCCASR2000000000                                   | sp Q9Y4F5 C170B_HUMAN |
| 8604 | AASPHQVTPQADEK2000000000000                           | sp Q96L73 NSD1_HUMAN  |
| 8605 | KGSSGNASEVSVACLTER200000000000                        | sp Q69YQ0 CYTSA_HUMAN |
| 8606 | SSSPTS YWK20000000                                    | sp Q92614 MY18A_HUMAN |
| 8607 | KSSPSVKPAVDPAAAK200000000000000                       | sp Q6FI81 CPIN1_HUMAN |
| 8608 | TVSSPPTSPRPGSAATVSASTSNIIPPR20200000000000            | sp 076094 SRP72_HUMAN |
| 8609 | ARVSPPPK20200000                                      | sp Q13247 SRSF6_HUMAN |
| 8610 | RREEGPPPPSPDGASSDAEPEPPSGR200000000000                | sp Q9NTJ3 SMC4_HUMAN  |
| 8611 | TPLLDEEEENPDK200000000000000                          | sp P23634 AT2B4_HUMAN |
| 8612 | ASLVALPEQTASEEETPPPLLTK200000200000000                | sp Q9UKV3 ACINU_HUMAN |
| 8613 | GLSDHVS LDGQELGTR20000000000                          | sp Q7L8J4 3BP5L_HUMAN |
| 8614 | SVSHGSNHTQKPDEQR200000000000000                       | sp Q9Y520 PRC2C_HUMAN |
| 8615 | VIYSQPSAR2000                                         | sp Q9Y624 JAM1_HUMAN  |
| 8616 | RESESEDETPPAAPQLIK2000200000000000000                 | sp 060832 DKC1_HUMAN  |
| 8617 | YSPTSPTYSPTTPK200030000000                            | sp P24928 RPB1_HUMAN  |
| 8618 | SNSFSDER2000000                                       | sp Q09666 AHNK_HUMAN  |
| 8619 | ATRPASTSQPDPSPDR20000020000                           | sp P20749 BCL3_HUMAN  |
| 8620 | LITPPPPPPSPER20000                                    | sp Q96HE9 PRR11_HUMAN |
| 8621 | GAAAADLLSSSPESQHGGTQSPGGGQPLLQPTK2E+23                | sp Q9H3S7 PTN23_HUMAN |
| 8622 | VDKETNTETPAPSPTVVRPK2000200000000                     | sp Q8IX03 KIBRA_HUMAN |
| 8623 | VIPAKSPPPHSTQLGAPSR20000000000000000                  | sp Q14814 MEF2D_HUMAN |
| 8624 | APSASDSKADSDGAKPEPVAMAR2.0202000002E+23               | sp Q7Z4V5 HDGR2_HUMAN |
| 8625 | VNLSSIR22000                                          | sp Q96DX4 RSPRY_HUMAN |
| 8626 | DGLAPEKTSPDR20000                                     | sp Q7L4I2 RSRC2_HUMAN |
| 8627 | GHYEVTGSDDDETGKLQSGVSLASK200000000000000              | sp Q09666 AHNK_HUMAN  |
| 8628 | SRTSPITR200200000                                     | sp Q9UQ35 SRRM2_HUMAN |
| 8629 | SRSPAPPADK200000000                                   | sp Q9Y618 NCOR2_HUMAN |
| 8630 | QRSLSPVAAPPLR202000000000                             | sp Q8NDT2 RB15B_HUMAN |
| 8631 | RLSSASTGKPLSVEDDFEK2200000000000000                   | sp 075152 ZC11A_HUMAN |
| 8632 | RDSFDNCSLGESSK2000020000000                           | sp Q5UIP0 RIF1_HUMAN  |
| 8633 | SPTTVLFTSSPIK200000020000                             | sp Q2KHR2 RFX7_HUMAN  |
| 8634 | LPQPPEGQCYSN200                                       | sp Q13404 UB2V1_HUMAN |
| 8635 | STPLASPSPPGRSPQR20002000200020000                     | sp Q8WYP5 ELYS_HUMAN  |
| 8636 | SPHSPSPATPPSQSSSCSDAPMLSTVHSAK222020000000000000      | sp Q9NYF8 BCLF1_HUMAN |
| 8637 | VLSGNCNHQEGTSSDDELPSAEMIDFQK20200000000000000         | sp P16383 GCFC2_HUMAN |

|      |                                                     |           |             |
|------|-----------------------------------------------------|-----------|-------------|
| 8638 | SPGFASPK200002000                                   | sp P49790 | NU153_HUMAN |
| 8639 | SSHSSDSGGSDVDLPTDGTK200200000000000                 | sp P78545 | ELF3_HUMAN  |
| 8640 | TPGVLLPGAGGAAGFGMTSPPPPTSPSR200000020000            | sp Q96L91 | EP400_HUMAN |
| 8641 | LSTTPAHSPVLK20000200000                             | sp Q6ZTU2 | E400N_HUMAN |
| 8642 | TSPQVLGSILK20000000000                              | sp Q8IY63 | AMOL1_HUMAN |
| 8643 | QSVTSFPDADAFHHQVHDDLLSSSEEECKDR2200000000           | sp Q7Z417 | NUFP2_HUMAN |
| 8644 | KVSSSSPQSGCPSPTIPAGK220020000000000000              | sp P50402 | EMD_HUMAN   |
| 8645 | QGGSQPSSSPGQSQVTPQDQEK2E+20                         | sp Q76L83 | ASXL2_HUMAN |
| 8646 | GGQGDPAVPTQQPADPSTPEQQNSPSGSEQFVR200000020000000000 | sp Q9H0L4 | CSTFT_HUMAN |
| 8647 | NTSLPPLWSPEAER2000002000000                         | sp O15231 | ZN185_HUMAN |
| 8648 | RDEDMLYSPELAQR20000000                              | sp P49790 | NU153_HUMAN |
| 8649 | KDRHDTDPSPR2000                                     | sp Q9Y2W2 | WBP11_HUMAN |
| 8650 | LSPERSSDSESNENEPHLPHGVSQR2.000200202E+24            | sp Q9BRD0 | BUD13_HUMAN |
| 8651 | SAGGSSPEGGEDSDREDGNYCPPVKR2.000220000002E+26        | sp Q9BQ52 | RN22_HUMAN  |
| 8652 | VTSSVPLPSGSTSSPGR20000                              | sp Q9H6Z4 | RANB3_HUMAN |
| 8653 | VPSTPPPK200000                                      | sp Q15036 | SNX17_HUMAN |
| 8654 | SSTVATLQGTPDHGDPR200000000                          | sp Q9H7N4 | SFR19_HUMAN |
| 8655 | KRPSLPSSPSPGLPK2000002000000                        | sp Q8IVT2 | MISP_HUMAN  |
| 8656 | SLESSVIMDR202000001000                              | sp O43294 | TGF11_HUMAN |
| 8657 | DGDSYDPYDFSDTEEEMPQVHTPK300200000000002000          | sp Q9H2Y7 | ZN106_HUMAN |
| 8658 | SRESSPSHGLLK2000200000000                           | sp P25205 | MCM3_HUMAN  |
| 8659 | GPTSSPCEEEGDEGEEDRTSDLR2E+20                        | sp Q96JH7 | VCIP1_HUMAN |
| 8660 | MPLAQKPALAPKPTSQTTPASPLSK2000200000                 | sp Q86VM9 | ZCH18_HUMAN |
| 8661 | ATSNVFMFDQSQIQEFK2000000000000000000                | sp Q6ZU35 | K1211_HUMAN |
| 8662 | TSSPPSPQHSPALR20002000000000                        | sp O14950 | ML12B_HUMAN |
| 8663 | TGSNISGASSDISLDEQYK2002002200000000000              | sp P19105 | ML12A_HUMAN |
| 8664 | KPSDSLVAASSR2020002200                              | sp P24844 | MYL9_HUMAN  |
| 8665 | GGSCSQAASSNSAQGSDESLIACKA20020000000                | sp Q13029 | PRDM2_HUMAN |
| 8666 | QESCSPHHPQVLAQQGSGSSPK2000                          | sp P22059 | OSBP1_HUMAN |
| 8667 | EKEDNSSEEEEEIEPFPEER22000000000000000               | sp Q5T0W9 | FA83B_HUMAN |
| 8668 | STSAPQMSPGSSDNQSSSPQPAQQK200000000                  | sp P30510 | 1C14_HUMAN  |
| 8669 | SSTLSSSSMSLSPK2000                                  | sp P04222 | 1C03_HUMAN  |
| 8670 | ISICSSDKR200000                                     | sp Q07000 | 1C15_HUMAN  |
| 8671 | HTSCSSAGNSKPVQEAPSVAR2.002E+20                      | sp Q29865 | 1C18_HUMAN  |
| 8672 | AKSPTSPSPPRNSDQEGGK2.02020200002E+19                | sp Q29960 | 1C16_HUMAN  |
| 8673 | GVGSGPHPPDTQQPSPSK20000                             | sp Q29963 | 1C06_HUMAN  |
| 8674 | SSSTEPPPPVVR2000000000                              | sp P30504 | 1C04_HUMAN  |
| 8675 | SKLSPSPSLRK200020000                                | sp P30508 | 1C12_HUMAN  |
| 8676 | NFSSEIEDLEK2200000000                               | sp Q95604 | 1C17_HUMAN  |
| 8677 | EVEEFSDEDDDDSDSSEAQKQSK2.00000002002E+20            | sp Q9TNN7 | 1C05_HUMAN  |
| 8678 | TDSV IADQTPPTR2000000000020000                      | sp P30505 | 1C08_HUMAN  |
|      |                                                     | sp Q8N1G0 | ZN687_HUMAN |
|      |                                                     | sp Q4LE39 | ARI4B_HUMAN |
|      |                                                     | sp Q14157 | UBP2L_HUMAN |
|      |                                                     | sp O15119 | TBX3_HUMAN  |
|      |                                                     | sp Q13547 | HDAC1_HUMAN |
|      |                                                     | sp Q9P246 | STIM2_HUMAN |
|      |                                                     | sp Q8IYB3 | SRRM1_HUMAN |
|      |                                                     | sp Q68CZ2 | TENS3_HUMAN |
|      |                                                     | sp Q8N684 | CPSF7_HUMAN |
|      |                                                     | sp Q5T200 | ZC3HD_HUMAN |
|      |                                                     | sp Q7Z3K6 | MIER3_HUMAN |
|      |                                                     | sp Q9Y2W2 | WBP11_HUMAN |
|      |                                                     | sp P17544 | ATF7_HUMAN  |

|      |                                                       |                       |
|------|-------------------------------------------------------|-----------------------|
| 8679 | FTMDLDSDEDFSDFEKTDDEDFVPSDASPPK2. 10002E+31           | sp P11388 TOP2A_HUMAN |
|      |                                                       | sp P49792 RBP2_HUMAN  |
|      |                                                       | sp Q7Z3J3 RGPD4_HUMAN |
|      |                                                       | sp O14715 RGPD8_HUMAN |
| 8680 | YSLSPSK20000                                          | sp Q99666 RGPD5_HUMAN |
|      |                                                       | sp A6NKT7 RGPD3_HUMAN |
|      |                                                       | sp P0DJ00 RGPD1_HUMAN |
|      |                                                       | sp P0DJ01 RGPD2_HUMAN |
| 8681 | SSTDLSLPGPISR20000000000                              | sp Q9HCD5 NCOA5_HUMAN |
| 8682 | HVTLPSSPR2000                                         | sp Q5T4S7 UBR4_HUMAN  |
| 8683 | AQSPVSGPNVAHLTDGATLNDR2E+20                           | sp Q5THJ4 VP13D_HUMAN |
| 8684 | LSLQHTQQNADGQEDGESERNSSSGDPGR2022000000               | sp O75052 CAPON_HUMAN |
| 8685 | SQEEPKDTFEHDPSESIDFNK2E+22                            | sp Q9NYF8 BCLF1_HUMAN |
| 8686 | AALAPAKESPRK20000                                     | sp Q13428 TCOF_HUMAN  |
| 8687 | ANNSPALTGNSQPQHAAAAAAQQQQCGGGGATKPAVSGK2E+38          | sp Q5VTL8 PR38B_HUMAN |
| 8688 | SLDSESI SPGDFHR200200020000000                        | sp Q52LW3 RHG29_HUMAN |
| 8689 | LPPPPPQAPPEEENESEPEEPSGVEGAAFQSR200000000000          | sp O60341 KDM1A_HUMAN |
| 8690 | EDFDTIESKDEK2200200000000                             | sp Q9NRL2 BAZ1A_HUMAN |
| 8691 | KASSDSEDSSEEEEEVQGPAPK2. 22020022E+22                 | sp Q14978 NOLC1_HUMAN |
| 8692 | RDSLGTYSR200000000                                    | sp Q9C0C2 TB182_HUMAN |
| 8693 | LMKPPSPEHQSLDTQQEGGEEVGPVAQQAIAVAEPSTSECLR2E+30       | sp Q9Y6X9 MORC2_HUMAN |
| 8694 | SSSPLPTVQLHPQSPTAGK2000000000002000000                | sp O60245 PCDH7_HUMAN |
| 8695 | TPQSPAPCVLLR2002000000000                             | sp Q9Y613 FHOD1_HUMAN |
| 8696 | DTYSDRSGSSPDSEITELK3000202200000000000                | sp P17812 PYRG1_HUMAN |
| 8697 | NLATSADTPPSTVPGTGK2200000000000000                    | sp Q96Q15 SMG1_HUMAN  |
| 8698 | RNSSDSAIDNPKPNK20020000000000                         | sp P46100 ATRX_HUMAN  |
| 8699 | YVASYLLAALGGNSSPSAK200000                             | sp P05387 RLA2_HUMAN  |
| 8700 | LEFQQQLGEAPSDASP200                                   | sp Q9BUW7 CI016_HUMAN |
| 8701 | VGVEASEETPTSSSSARPGTPSDHQSEASQFER2E+23                | sp Q6Y7W6 PERQ2_HUMAN |
| 8702 | DGDSYDPYDFSDTEEEMPQVHTPK2000100000000                 | sp P25205 MCM3_HUMAN  |
| 8703 | APSPGAYK2000000                                       | sp P54259 ATN1_HUMAN  |
| 8704 | GSISSTSEVHSPNVGLR2000020000000000000                  | sp Q8WWQ0 PHIP_HUMAN  |
| 8705 | SSFHYSGLK2000000000                                   | sp Q8NC51 PAIRB_HUMAN |
| 8706 | KPEKPLFSSASPQDSSPR20000000000                         | sp O00712 NF1B_HUMAN  |
| 8707 | RNSSDSAIDNPKPNKLPK2002000000000000000                 | sp P46100 ATRX_HUMAN  |
| 8708 | KPLEEKPSQPYSAR20002000                                | sp Q14517 FAT1_HUMAN  |
| 8709 | YTPTSPSYSPSPEYTPSPK20200030000000                     | sp P24928 RPB1_HUMAN  |
| 8710 | DNSNSDSEGEDRRPAGPPR20200000000000000                  | sp Q8NCF5 NF2IP_HUMAN |
| 8711 | QRSPIALPVK200000000                                   | sp Q8TF01 PNISR_HUMAN |
| 8712 | QFTSSSIK20000                                         | sp Q04695 K1C17_HUMAN |
| 8713 | SRTSPVTR202000000                                     | sp Q9UQ35 SRRM2_HUMAN |
| 8714 | GYSSPEPDIQDSSGSEAQSVKPTR2. 00000002202E+22            | sp Q9BZF1 OSBL8_HUMAN |
| 8715 | SSSPTSSLTQPIEMPTLSSPTEERPTVGGQDNPLK2. 02000000001E+37 | sp Q7LBC6 KDM3B_HUMAN |
| 8716 | TVSASSTGDLPK22000000                                  | sp P78362 SRPK2_HUMAN |
| 8717 | GRLDSSEMDHSENYDTMSSPLPGK2. 010020000001E+20           | sp Q9NTI5 PDS5B_HUMAN |
| 8718 | SWVIGSPEILR2000000                                    | sp Q6P0Q8 MAST2_HUMAN |
| 8719 | VTPHPSPR20002000                                      | sp Q8IWQ3 BRSK2_HUMAN |
| 8720 | LHQASASSTSSLSTR200000                                 | sp O15085 ARHGB_HUMAN |
| 8721 | SEDESETEDEEEKSQEDQEQK2000000000000000000              | sp P25205 MCM3_HUMAN  |
| 8722 | RPPEEDFRHSPEEDFRQSPQEHFR2000000020000000              | sp Q8IXT5 RB12B_HUMAN |
| 8723 | RSLSGSSPCPK20200000000                                | sp Q9UQ35 SRRM2_HUMAN |
| 8724 | LLKPGEEPSEYTDDEEDTK20020000000                        | sp O15173 PGRC2_HUMAN |
| 8725 | LLASPSSR200000                                        | sp Q15003 CND2_HUMAN  |

|      |                                                    |                       |
|------|----------------------------------------------------|-----------------------|
| 8726 | SFGTRPLSSGFSPEEAQQQDEEFEK200000000000000000        | sp Q9C0C2 TB182_HUMAN |
| 8727 | SKPNLPSESR20000                                    | sp Q08170 SRSF4_HUMAN |
| 8728 | EVEEDSEDEEMSEDEEDDSSGEEVVIPQKK2.00001200000002E+25 | sp P19338 NUCL_HUMAN  |
| 8729 | SSRSSPELTR22002000000                              | sp Q9UQ35 SRRM2_HUMAN |
| 8730 | TSPVVAPTSEPSSPLHTQLLK22000000000                   | sp 075044 SRGP2_HUMAN |
| 8731 | ATTPPNQGRPDSPVYANLQELK2.0000000002E+21             | sp Q8IWW6 RHG12_HUMAN |
| 8732 | LNASPAAR200000                                     | sp Q9UGU0 TCF20_HUMAN |
| 8733 | TSPAPWK2000000                                     | sp Q9UQ35 SRRM2_HUMAN |
| 8734 | DGQVINETSQHDDLE200000000                           | sp P08670 VIME_HUMAN  |
| 8735 | SSTVTEAPIAVVTSR2200000000000000                    | sp Q8TD19 NEK9_HUMAN  |
| 8736 | LSSSSPGATVSPSSSDAEYDKLPDADLAR2E+27                 | sp Q8NI08 NCOA7_HUMAN |
|      |                                                    | sp P30510 1C14_HUMAN  |
|      |                                                    | sp Q9TNN7 1C05_HUMAN  |
|      |                                                    | sp P04222 1C03_HUMAN  |
|      |                                                    | sp Q07000 1C15_HUMAN  |
|      |                                                    | sp Q29865 1C18_HUMAN  |
| 8737 | GGSCSQAASSNSAQGSDESLIACK2000000000                 | sp Q29960 1C16_HUMAN  |
|      |                                                    | sp Q29963 1C06_HUMAN  |
|      |                                                    | sp P30504 1C04_HUMAN  |
|      |                                                    | sp P30505 1C08_HUMAN  |
|      |                                                    | sp P30508 1C12_HUMAN  |
|      |                                                    | sp Q95604 1C17_HUMAN  |
| 8738 | SVSSPTSSNTPPTK200000000000000000                   | sp Q5M775 CYTSB_HUMAN |
| 8739 | ELSTSPCNPIVR2200000000                             | sp Q9H2Y7 ZN106_HUMAN |
| 8740 | GQSQTSPDHRSDTSSPEVR202000000002200000              | sp Q9UQ35 SRRM2_HUMAN |
| 8741 | QEEEEAAQGPVVVSPASDYK20000000                       | sp 075391 SPAG7_HUMAN |
| 8742 | VSGTLDTPEK20000                                    | sp Q9BYG3 MK67I_HUMAN |
| 8743 | SPAKSPNPSTPR2000000022000                          | sp 076021 RL1D1_HUMAN |
| 8744 | RLSESSALK20000000                                  | sp Q96S55 WRIP1_HUMAN |
| 8745 | TDALTSSPGR20000220000                              | sp P49736 MCM2_HUMAN  |
| 8746 | MAPALSGANLTSPR100000000002000                      | sp Q9UQ35 SRRM2_HUMAN |
| 8747 | GLLPGGTQVLDGTSGFSPAPK200000                        | sp Q96S94 CCNL2_HUMAN |
| 8748 | IEEVLSPEGSPSKSPSK20000000                          | sp Q9UEY8 ADDG_HUMAN  |
| 8749 | SQDADSPGSSGAPENLTFK2000000000000000                | sp P55196 AFAD_HUMAN  |
| 8750 | TQSPEFEAQSSK20000000000                            | sp Q9H5H4 ZN768_HUMAN |
| 8751 | LASDDRPSPPR2000000000                              | sp P98175 RBM10_HUMAN |
| 8752 | SRSPPPVSK2020000000                                | sp Q01130 SRSF2_HUMAN |
| 8753 | RFSRSPIR2020000                                    | sp P18583 SON_HUMAN   |
| 8754 | KLSEADNR2000000                                    | sp Q9UNL2 SSRG_HUMAN  |
| 8755 | LSSSSPGATVSPSSSDAEYDKLPDADLAR2.00000003E+19        | sp Q8NI08 NCOA7_HUMAN |
| 8756 | SREDSPELNPPPIEDNR20002000000000000000              | sp Q03164 KMT2A_HUMAN |
| 8757 | ALEAASLSQHPPSLCISDSEEEEEER2000200000000000         | sp 043159 RRP8_HUMAN  |
| 8758 | KRPESSDYDLSPAK20000                                | sp Q6W2J9 BCOR_HUMAN  |
| 8759 | TESGEETDLISPPQEEVK20000000000000000000             | sp 043493 TGON2_HUMAN |
| 8760 | SMVSPVPSPTGTISVPNSCPASPR2.102E+24                  | sp P85037 FOXK1_HUMAN |
| 8761 | LVEDERSDREETESSEGEAAAAGGAK2.00002002E+21           | sp Q96G23 CERS2_HUMAN |
| 8762 | TSPLKDNPSPEPQLDDIKR200000000000                    | sp Q96JC9 EAF1_HUMAN  |
| 8763 | GSVILDSGHLSTASSDDLKGEESFR2200000000000000          | sp Q92614 MY18A_HUMAN |
| 8764 | SGSEDEDDGETLLEVAGTQGK2.002000002E+20               | sp Q9P1Y6 PHRF1_HUMAN |
| 8765 | SGSSPDSEITELKFPSINH20000000000000000000            | sp P17812 PYRG1_HUMAN |
| 8766 | MVSQSQPGSR200                                      | sp 075122 CLAP2_HUMAN |
| 8767 | SLGEKSPAASGAR2000000000                            | sp 075683 SURF6_HUMAN |
| 8768 | EEGSLSDTEADAVSGQLPDPTTNPAGK2000000000000000        | sp Q8N1G4 LRC47_HUMAN |
| 8769 | RKPSTSDSDSNFEK22000200000000                       | sp P11388 TOP2A_HUMAN |

|      |                                            |                       |
|------|--------------------------------------------|-----------------------|
| 8770 | GLAPNTPGK20000                             | sp 043663 PRC1_HUMAN  |
| 8771 | DLSTSPKPSPIPSVLGR200000002000000           | sp Q8NDI1 EHBP1_HUMAN |
| 8772 | RVPSPTAPK20000000                          | sp Q9UQ35 SRRM2_HUMAN |
| 8773 | SRSYTPEYR2023000000                        | sp Q13595 TRA2A_HUMAN |
| 8774 | LLKPGEPESEYTDDEEDTKDHNKQD20000000000000000 | sp O15173 PGRC2_HUMAN |
| 8775 | LPSSPASPSPKGTPEK200020000                  | sp Q9H4G0 E41L1_HUMAN |
| 8776 | ALEQQEAESDSSDTEEKDDDDDEEDVGK2.02202E+21    | sp Q9BXY0 MAK16_HUMAN |
| 8777 | ERSKDASPINR2000200000                      | sp Q13523 PRP4B_HUMAN |
| 8778 | RPSSTSVPLGDK2000000000                     | sp Q9NXR1 NDE1_HUMAN  |
| 8779 | ISSPMHPSAGGQR200000000000                  | sp O00267 SPT5H_HUMAN |
| 8780 | VASPSQGQVGS SSPK2000                       | sp Q99569 PKP4_HUMAN  |
| 8781 | DTIIDVVGAPLTPNSR200000                     | sp Q9NPF5 DMAP1_HUMAN |
| 8782 | KPVNYSQFDHSDSDDDFVSATVPLNK2.0000002E+21    | sp Q96B01 R51A1_HUMAN |
| 8783 | LKTSLGK20000                               | sp P46013 KI67_HUMAN  |
| 8784 | EESDDEDKESEEEPPK2200000020000000           | sp P35659 DEK_HUMAN   |
| 8785 | SSSTEPPPPVR200000000                       | sp Q8N684 CPSF7_HUMAN |
| 8786 | SPPSQKSPHDSKSPLDHR2000002000002000000      | sp O14647 CHD2_HUMAN  |
| 8787 | SSGHSSSELSPDAVEK22002020020000000          | sp Q9UQ35 SRRM2_HUMAN |
| 8788 | RSSPPPPSGSSSR2000000000000                 | sp Q5VUA4 ZN318_HUMAN |
| 8789 | TVCGSPLAAQSPSAELPQAAPPPGSPSLPGR2E+29       | sp Q969V6 MKL1_HUMAN  |
| 8790 | TPALAALALGAPGAPTAASSP200                   | sp Q86V15 CASZ1_HUMAN |
|      |                                            | sp Q99880 H2B1L_HUMAN |
|      |                                            | sp P33778 H2B1B_HUMAN |
|      |                                            | sp Q99877 H2B1N_HUMAN |
|      |                                            | sp Q8N257 H2B3B_HUMAN |
|      |                                            | sp Q96A08 H2B1A_HUMAN |
|      |                                            | sp Q5QNW6 H2B2F_HUMAN |
|      |                                            | sp P06899 H2B1J_HUMAN |
| 8791 | QVHPDTGISSK2000                            | sp Q16778 H2B2E_HUMAN |
|      |                                            | sp P23527 H2B1O_HUMAN |
|      |                                            | sp P57053 H2BFS_HUMAN |
|      |                                            | sp P58876 H2B1D_HUMAN |
|      |                                            | sp O60814 H2B1K_HUMAN |
|      |                                            | sp P62807 H2B1C_HUMAN |
|      |                                            | sp Q93079 H2B1H_HUMAN |
|      |                                            | sp Q99879 H2B1M_HUMAN |
| 8792 | RRDEDMLYSPELAQR20000000                    | sp Q9Y2W2 WBP11_HUMAN |
| 8793 | VSEEQTQPPSPAGAGMSTAMGR20000010000000       | sp Q16666 IF16_HUMAN  |
| 8794 | NSDFLFGLGLEEAGPKESSEEGKEGK2200000000       | sp Q3YEC7 RABL6_HUMAN |
|      |                                            | sp P01891 1A68_HUMAN  |
|      |                                            | sp P01892 1A02_HUMAN  |
| 8795 | GGSYSQAASSDSAQGS DVSLTACK2002000000        | sp P05534 1A24_HUMAN  |
|      |                                            | sp Q09160 1A80_HUMAN  |
|      |                                            | sp P10316 1A69_HUMAN  |
|      |                                            | sp P30447 1A23_HUMAN  |
| 8796 | LPSSPVYEDAASF200000002000                  | sp Q14247 SRC8_HUMAN  |
| 8797 | AQTTPGPSLSGSKSPCPQEK2000000200000000000    | sp Q9UQ35 SRRM2_HUMAN |
| 8798 | SRNSPLLER2000000                           | sp Q7KZI7 MARK2_HUMAN |
| 8799 | VSGAQEMVSSAK200001000000                   | sp O60664 PLIN3_HUMAN |
| 8800 | QYPDSPHPVPHR200000000                      | sp Q5VT52 RPRD2_HUMAN |
| 8801 | DASDDLDDLNFFNQK200000000000000             | sp P20042 IF2B_HUMAN  |
| 8802 | RKHSPSPPPPTPTESR20200000000000             | sp Q92922 SMRC1_HUMAN |
| 8803 | KISPPSYAR20000000                          | sp Q8N2M8 CLASR_HUMAN |
| 8804 | ALEEGDGSVSGSSPR20000                       | sp Q8N3X1 FNBP4_HUMAN |



|      |                                                    |                       |
|------|----------------------------------------------------|-----------------------|
|      |                                                    | sp P49792 RBP2_HUMAN  |
|      |                                                    | sp Q7Z3J3 RGPD4_HUMAN |
| 8805 | EDALDDSVSSSSVHASPLASSPVRK200000                    | sp O14715 RGPD8_HUMAN |
|      |                                                    | sp Q99666 RGPD5_HUMAN |
|      |                                                    | sp A6NKT7 RGPD3_HUMAN |
| 8806 | SWDSSSPVDRPEPEAASPTTR2.002E+21                     | sp Q86WB0 NIPA_HUMAN  |
| 8807 | NQSPTEAEKPASSSLPSSPPPQLLTR20020000000000           | sp Q99567 NUP88_HUMAN |
| 8808 | ERPSGPESPVQGPR20000000                             | sp Q9UMN6 KMT2B_HUMAN |
| 8809 | SPQPDPVKTPTSSK200000002002000                      | sp P46013 KI67_HUMAN  |
| 8810 | NTLQLHR2000000                                     | sp P61313 RL15_HUMAN  |
| 8811 | SSGVVPQSAPPVPTASSR200000000000                     | sp P41162 ETV3_HUMAN  |
| 8812 | TPTPSTPGDTQNPNTAPVPPAEDGIK2.00000002E+21           | sp Q14839 CHD4_HUMAN  |
| 8813 | SSSFSELCHR2000000000                               | sp Q5T8I3 F102B_HUMAN |
| 8814 | RRSFSISPVR202020000                                | sp P18583 SON_HUMAN   |
| 8815 | AAESETPGKSPEKKPK200000000000                       | sp O76021 RL1D1_HUMAN |
| 8816 | SGLDLNTSLSPSLQPGK2000000000                        | sp Q99708 COM1_HUMAN  |
| 8817 | SPQRSPLQSAESSPTAGK2000200000000020000              | sp Q8IWB9 TEX2_HUMAN  |
| 8818 | SPSPAVPLR2000000000                                | sp Q6P4R8 NFRKB_HUMAN |
| 8819 | STSAPQMSPGSSDNQSSSPQPAQQK1.2002E+19                | sp Q14157 UBP2L_HUMAN |
| 8820 | KHSPSPPPPTPTESRK202000000000000                    | sp Q92922 SMRC1_HUMAN |
| 8821 | QLVYVEQAGSSPK20000                                 | sp Q9C0H5 RHG39_HUMAN |
| 8822 | GGHSSVSTESESSSFHSS2020000000000000                 | sp P61073 CXCR4_HUMAN |
| 8823 | LDSSPVSSPR20020000                                 | sp O60293 ZC3H1_HUMAN |
| 8824 | SQSKSPTGTPAR20200020000                            | sp Q13595 TRA2A_HUMAN |
| 8825 | VTQGAASPGHGIQEK2000000000                          | sp Q9HB58 SP110_HUMAN |
| 8826 | SSSVLSLEGSEK200020002000                           | sp A1L390 PKHG3_HUMAN |
| 8827 | DSTSQHDDDNISTTSGFSSRASDKDITVSK2.2220022E+19        | sp P49790 NU153_HUMAN |
| 8828 | SVSGSPEPAAK2020000000                              | sp Q8IYB3 SRRM1_HUMAN |
| 8829 | IPRPSVSGCSR2000200                                 | sp O75122 CLAP2_HUMAN |
| 8830 | SLPSSQLKGSPPQAIISR20000000                         | sp Q8WYP5 ELYS_HUMAN  |
| 8831 | MLPHAPGVQMQAIPEDAVHEDSGDEDGEDPDKR1.00000000002E+24 | sp Q92769 HDAC2_HUMAN |
| 8832 | AGPVSPGCVK2000000                                  | sp Q53GL7 PAR10_HUMAN |
| 8833 | AQQELVPPQQQASPPQLPK20000000                        | sp O15027 SC16A_HUMAN |
| 8834 | TAVPPLSEGDGYSSENTSRSR22000000                      | sp Q9BYW2 SETD2_HUMAN |
| 8835 | RESESEDETPPAAPQLIK200020020000000000               | sp O60832 DKC1_HUMAN  |
| 8836 | SHMSGSPGPGSNTAPSTPVIIGSDKPGMEEK2.02E+29            | sp A0FGR8 ESYT2_HUMAN |
| 8837 | DDGDEEGLLTHSEEELEHSQDTDADDGALQ2.000000002E+21      | sp Q9UKM9 RALY_HUMAN  |
| 8838 | QKSDAEEDGGTVSQEEEDRKPK2.0000000202E+20             | sp P27824 CALX_HUMAN  |
| 8839 | HNSPTLSCR20000000                                  | sp Q5T5U3 RHG21_HUMAN |
| 8840 | LPPQSSGVDTSPCPNPFR200000                           | sp O75815 BCAR3_HUMAN |
| 8841 | EAASSPAGEPLR2200000000                             | sp Q96EB6 SIR1_HUMAN  |
| 8842 | SSSLGSTPHEELER22000000000000                       | sp Q9NRA8 4ET_HUMAN   |
| 8843 | ALFKPPEDSQDDESDDAEEEQTTKR2000020000000000000       | sp Q13769 THOC5_HUMAN |
| 8844 | ALPSLNTGSSSPR20002000                              | sp O14545 TRAD1_HUMAN |
| 8845 | IKDTCIQSPSK20000                                   | sp Q03188 CENPC_HUMAN |
| 8846 | TLSSSSMDLSR20000000                                | sp Q9H0B6 KLC2_HUMAN  |
| 8847 | DSHSSEDEASSQTDLSQTISK202000000000                  | sp Q5JTV8 TOIP1_HUMAN |
| 8848 | HGGSPQPLATTPLSQEPVNPPEASPTR2.200200000002E+19      | sp Q9UQ35 SRRM2_HUMAN |
| 8849 | GGNLPPVSPNDGAK2000000000                           | sp Q9UK61 F208A_HUMAN |
| 8850 | SPNSHDSEPWTLLR200000000                            | sp Q5T5Y3 CAMP1_HUMAN |
| 8851 | SPPSVQSLAMR200000000000                            | sp Q96KQ7 EHMT2_HUMAN |
| 8852 | SRSGEGEVSGLMR20000000000000                        | sp Q13263 TIF1B_HUMAN |
| 8853 | IYSFTDNAPSPSIGSSR2000000000                        | sp O15014 ZN609_HUMAN |
| 8854 | QGSPVSPNALDR20000000                               | sp Q5VWQ8 DAB2P_HUMAN |

|      |                                                       |                       |
|------|-------------------------------------------------------|-----------------------|
| 8855 | SWDSSSPVDRPEPEAASPTTR220000000000200000               | sp Q86WB0 NIPA_HUMAN  |
| 8856 | ASSLESGVPSR200                                        | sp P01598 KV106_HUMAN |
| 8857 | ASTTSLSGDSETEGK20200000000                            | sp Q8N1G2 CMTR1_HUMAN |
| 8858 | VRRPIPGSDQTTTMSGGEGEPGEGEGDGEDVSSDSAPDSAPGPAPK1E+33   | sp Q06587 RING1_HUMAN |
| 8859 | TPLALAGSPTPK2000000200000                             | sp 095785 WIZ_HUMAN   |
| 8860 | SQLSFLPTEAQAQVSPPPYPAPQELTQPLLQQPR2E+32               | sp Q6UUU7 CRTC3_HUMAN |
| 8861 | GQTPLTEGSELDGHSDPEESFAR2000000000                     | sp Q86VR2 F134C_HUMAN |
|      |                                                       | sp POCL80 GG12F_HUMAN |
|      |                                                       | sp POCL81 GG12G_HUMAN |
|      |                                                       | sp POCL82 GG12I_HUMAN |
| 8862 | YVQPPEMIGPMRPEQFSDEVEPATPEEGEPATQR1.0001E+28          | sp Q13065 GAGE1_HUMAN |
|      |                                                       | sp Q13068 GAGE4_HUMAN |
|      |                                                       | sp 076087 GAGE7_HUMAN |
| 8863 | SPMCNQPSINK200000000000                               | sp Q08499 PDE4D_HUMAN |
| 8864 | SRSPPKKPPK20200000000                                 | sp Q8IYB3 SRRM1_HUMAN |
| 8865 | LSSSFSSR200000                                        | sp Q9NRL2 BAZ1A_HUMAN |
| 8866 | VLGSEGEEDEALSPAK20000                                 | sp P18858 DNLI1_HUMAN |
| 8867 | KMVIDMVLATDMSK10001000200000                          | sp Q07343 PDE4B_HUMAN |
|      |                                                       | sp P27815 PDE4A_HUMAN |
| 8868 | RSPSVSSPEPAEK20220000000                              | sp Q9UQ35 SRRM2_HUMAN |
| 8869 | SRSSSVGSSSYPIPAVSR2220000000000                       | sp Q15149 PLEC_HUMAN  |
| 8870 | SSLAETLDSTGSLDPQR200000000                            | sp Q9UGH3 S23A2_HUMAN |
| 8871 | GIISDGESN22000200                                     | sp Q9BW71 HIRP3_HUMAN |
| 8872 | SFSISPVR200020000                                     | sp P18583 SON_HUMAN   |
| 8873 | DSLSPVLHPSDLILTR2000000000000000                      | sp Q9HCN4 GPN1_HUMAN  |
| 8874 | GSLAEAVGSPPPAATPTPTPTR2.0000002E+22                   | sp Q9Y6I3 EPN1_HUMAN  |
| 8875 | ELSPAGSISK200020000                                   | sp 095453 PARN_HUMAN  |
| 8876 | AISSDDSSDEDK22200220000000                            | sp Q6PD62 CTR9_HUMAN  |
| 8877 | GHPAQRPEPSPPEPEQAPEGSQAGAEGSSPEASRSPAR20000020000     | sp Q6ZW31 SYDE1_HUMAN |
| 8878 | FIQELSGSSPK20000                                      | sp Q01664 TFAP4_HUMAN |
| 8879 | AFLAELEQNSPK2000                                      | sp Q9UPN3 MACF1_HUMAN |
| 8880 | EIQNGNLHESDSESVPR2000000                              | sp Q86UP2 KTN1_HUMAN  |
| 8881 | SRTPTSR200002000                                      | sp Q9UQ35 SRRM2_HUMAN |
|      |                                                       | sp P49792 RBP2_HUMAN  |
|      |                                                       | sp Q7Z3J3 RGPD4_HUMAN |
|      |                                                       | sp A6NKT7 RGPD3_HUMAN |
| 8882 | DSLITPHVSR2000200                                     | sp O14715 RGPD8_HUMAN |
|      |                                                       | sp Q99666 RGPD5_HUMAN |
|      |                                                       | sp PODJD0 RGPD1_HUMAN |
|      |                                                       | sp PODJD1 RGPD2_HUMAN |
| 8883 | DYEPSPSPAPGAPPPPPQR20000000000000                     | sp P55196 AFAD_HUMAN  |
| 8884 | SLSTSGESLYHVLGLDK20000000000000                       | sp Q9H3Z4 DNJC5_HUMAN |
| 8885 | SSTPLPTISSAENTR22000000000000200                      | sp P42167 LAP2B_HUMAN |
|      |                                                       | sp P42166 LAP2A_HUMAN |
| 8886 | TEESPASDEAGEK20000000000                              | sp P05114 HMG1_HUMAN  |
| 8887 | TRSPSPTLGESLAPHK200000002000000                       | sp Q86UU1 PHLB1_HUMAN |
| 8888 | FTGSFDDDPDHRDPYGEVDR2E+21                             | sp O15027 SC16A_HUMAN |
| 8889 | ESSPIPSPTSDRK2000020000000                            | sp Q01082 SPTB2_HUMAN |
| 8890 | WHASLYPASGR2000                                       | sp Q9NRA8 4ET_HUMAN   |
| 8891 | KGSVSHDTVQPR200000                                    | sp Q96D71 REPS1_HUMAN |
| 8892 | IYHPSCYEDYQNTSSFDCTPSPSK2020000                       | sp 094913 PCF11_HUMAN |
| 8893 | SSPINPAQSGSPNHVDSAYFPGSSTSSSSDNDEGSGGATNHISGNK2.2E+46 | sp Q9NZB2 F120A_HUMAN |
| 8894 | QKSDAEEDGGTVSQEEDR2020000000                          | sp P27824 CALX_HUMAN  |

|      |                                                   |                        |
|------|---------------------------------------------------|------------------------|
| 8895 | KKSSSEAKPTSLGLAGGHK202000002000000000             | sp Q96RK0 CIC_HUMAN    |
| 8896 | YTPTSPSYSPSSPEYTPK2020000030000000                | sp P24928 RPB1_HUMAN   |
| 8897 | LSSLRASTSK2200000000                              | sp P62753 RS6_HUMAN    |
| 8898 | YQPLASTASDNDFVTPEPR200000200000                   | sp Q15021 CND1_HUMAN   |
| 8899 | RHSASNLHALAHPAPSPGSCSPK2E+19                      | sp P47974 TISD_HUMAN   |
| 8900 | DFDHHDSPALEVFTEQPPSPLPK200000                     | sp Q92545 TM131_HUMAN  |
| 8901 | AGPDLPSPSLSHALEDEGWAAAAPSPGSAR2000000             | sp Q9H3Q1 BORG4_HUMAN  |
| 8902 | FSGFSAKPNNSGEAPSSPTPK200000                       | sp P49916 DNLI3_HUMAN  |
| 8903 | HFTNSVNPNR2000000                                 | sp Q8WUX9 CHMP7_HUMAN  |
| 8904 | LESLETPGPSSPR2000                                 | sp Q12774 ARHG5_HUMAN  |
| 8905 | SAPASPTHPLMSPR2000002000000000                    | sp P85037 FO XK1_HUMAN |
| 8906 | IHLPLNYPPGSPDLGR2000000                           | sp Q08174 PCDH1_HUMAN  |
| 8907 | TLNAETPKSSPLPAK2000020000000000                   | sp Q7L2J0 MEPCE_HUMAN  |
| 8908 | LKNGFPHPEDCNPSEAASEESNSEIEQEIPVEQK2.000200002E+21 | sp Q9NR30 DDX21_HUMAN  |
| 8909 | SLRGSDALSETSSVSHIEDLEK202220000000000             | sp Q6P996 PDXD1_HUMAN  |
| 8910 | SGSSSPDSEITELKFPSINH200200200000000000            | sp P17812 PYRG1_HUMAN  |
| 8911 | RRSPSPYYSR202000000                               | sp P62995 TRA2B_HUMAN  |
| 8912 | SSSVGSSSSYPISPAVSR3002000000                      | sp Q13595 TRA2A_HUMAN  |
| 8913 | LDQPGNLPGSNR2000                                  | sp Q15149 PLEC_HUMAN   |
| 8914 | FIIGSVSEDNSEDEISNLVK2000000000000000              | sp P46013 KI67_HUMAN   |
| 8915 | SLPAPVAQRPDSPGGGLQAPGQK2000000000000              | sp Q13085 ACACA_HUMAN  |
| 8916 | ISVSSPGR20000                                     | sp Q5JVS0 HABP4_HUMAN  |
| 8917 | GPSPAPASSPKR200000                                | sp 075864 PPR37_HUMAN  |
| 8918 | SKDEEEDDESDDADDTPIPKVSLLR20000000000000000        | sp Q9H7N4 SFR19_HUMAN  |
| 8919 | SFSISPSR202000000                                 | sp Q92794 KAT6A_HUMAN  |
| 8920 | SVGGSDTEDMR2000000200000                          | sp P18583 SON_HUMAN    |
| 8921 | KESEEDSSDEPLIKK20022000000000                     | sp Q9UK61 F208A_HUMAN  |
| 8922 | AELGMDSTSQSPPIK1000000200000                      | sp P35659 DEK_HUMAN    |
| 8923 | QLSSSAAPAAQPPGSR20000000000000000                 | sp Q9NR19 ACSA_HUMAN   |
| 8924 | SLSYSPVER2020000000                               | sp Q9ULQ1 TPC1_HUMAN   |
| 8925 | DEDGESGGQRSEAEEGEVRTPTK2000020000000000000        | sp Q9UQ35 SRRM2_HUMAN  |
|      |                                                   | sp Q9H4G0 E41L1_HUMAN  |
|      |                                                   | sp Q09160 1A80_HUMAN   |
|      |                                                   | sp P05534 1A24_HUMAN   |
| 8926 | GGSYSQAASSDSAQGSVSLTACK2E+22                      | sp P30447 1A23_HUMAN   |
|      |                                                   | sp P01891 1A68_HUMAN   |
|      |                                                   | sp P01892 1A02_HUMAN   |
|      |                                                   | sp P10316 1A69_HUMAN   |
| 8927 | GVSMSLPSSPLLPR20002000000                         | sp Q9C0D5 TANC1_HUMAN  |
| 8928 | LLPYPTLASPASD200                                  | sp P0C1Z6 TFPT_HUMAN   |
| 8929 | ETPAATEAPSSPK200000                               | sp P80723 BASP1_HUMAN  |
| 8930 | SPQRPSDWSK20000000000                             | sp Q5UIP0 RIF1_HUMAN   |
| 8931 | TASISSPSEGTPVGSYGCTPQSLPK2E+27                    | sp Q6PKG0 LARP1_HUMAN  |
| 8932 | ELTPASPTCTNSVSK2000000                            | sp P28715 ERCC5_HUMAN  |
| 8933 | RPAEATSSPTSPERPR2020000000                        | sp Q9BU76 MMTA2_HUMAN  |
| 8934 | HVTLPSSPR20020000                                 | sp Q5T4S7 UBR4_HUMAN   |
| 8935 | TSISDPPEPSPLLPR2000000200000000                   | sp Q07889 SOS1_HUMAN   |
| 8936 | EFGSPSTPTGTLEFEGGEVSLEGGK2000000000000000         | sp Q09666 AHNK_HUMAN   |
| 8937 | LGSTGSQPNSAEVSPENVPKPLLPK2.002E+26                | sp Q8IZ21 PHAR4_HUMAN  |
| 8938 | RSFSISPSR202020000                                | sp P18583 SON_HUMAN    |
| 8939 | RLSSSESPQRDPPPPPPPPPLLR2.22E+21                   | sp Q9H2G4 TSYL2_HUMAN  |
| 8940 | RASISEPSDTPPEPR20200200000000                     | sp Q8N1F8 S11IP_HUMAN  |
| 8941 | SRSPSPAPEK20202000000                             | sp Q8IYB3 SRRM1_HUMAN  |

|      |                                                        |                       |
|------|--------------------------------------------------------|-----------------------|
| 8942 | EQGTESRSSTPLPTISSSAENTR2200000000000000                | sp P42166 LAP2A_HUMAN |
|      |                                                        | sp P42167 LAP2B_HUMAN |
| 8943 | MAESPCSPSGQQPPSPSPDEL PANVK2. 000002002E+19            | sp Q14160 SCRIB_HUMAN |
| 8944 | RLSNLPTVDPIAVCHELYNTIR2E+20                            | sp Q86U86 PB1_HUMAN   |
| 8945 | SPAGPAATPAQAQAASTPR2000000000000                       | sp Q13428 TCOF_HUMAN  |
| 8946 | RSFISISPVR202020000                                    | sp P18583 SON_HUMAN   |
| 8947 | FGSTGSTPPVSPTPSER200020200000                          | sp Q969V6 MKL1_HUMAN  |
| 8948 | KTSSVSSISQVSPER200000000020000                         | sp P42356 PI4KA_HUMAN |
| 8949 | DTPGCATTPPHSQASSVR200000000000                         | sp Q15572 TAF1C_HUMAN |
| 8950 | SYNVHHPWETGHCLSEGS DSSLEEPSK20020220000000             | sp Q9NW75 GPTC2_HUMAN |
| 8951 | LPDDYDPYAVEEPSDEEPALSSSEDEV DVLHGTDPQK2. 000000222E+25 | sp Q56P03 EAPP_HUMAN  |
| 8952 | SSGNSPTPVS R20000000                                   | sp 095429 BAG4_HUMAN  |
| 8953 | NISSSPSVESLPGR2002000000                               | sp Q92609 TBCD5_HUMAN |
| 8954 | IVAHAVEVPAVQSPR2000                                    | sp Q96FF9 CDA5_HUMAN  |
| 8955 | IPLFNTDVDNLEGKTPPVFASEGK20000000000                    | sp Q96PZ0 PUS7_HUMAN  |
| 8956 | LSSGPEQITLEASSTEGHPGAPSPQHTDQTEAFQK2E+33               | sp Q6P996 PDXD1_HUMAN |
| 8957 | SLDGAEF SRPASVSENHDAGPDGDKR2E+26                       | sp Q9H4G0 E41L1_HUMAN |
| 8958 | SLTRSPPAIR20200000000                                  | sp Q9UQ35 SRRM2_HUMAN |
| 8959 | DTLSNPQSPQSPYNSPKPQHK2000200020000000                  | sp Q96PU5 NED4L_HUMAN |
| 8960 | APYQENDGYCPDLELSDSEAESDGNKEK20200020000000             | sp Q92613 JADE3_HUMAN |
| 8961 | RLSQPESAEK200020000                                    | sp Q9UKV3 ACINU_HUMAN |
| 8962 | ERSPSPLRGNVVPSPLPTR2020000000000000000                 | sp Q9Y2V2 CHSP1_HUMAN |
| 8963 | SATRPSPSPER2020000                                     | sp Q9UQ35 SRRM2_HUMAN |
| 8964 | ASPITNDGEDEFVPSDGLDKDEYTFSPGK2000000                   | sp Q02880 TOP2B_HUMAN |
| 8965 | AFSEGGITR20000000                                      | sp Q96GN5 CDA7L_HUMAN |
| 8966 | SKSPCQTLGGR2000000000                                  | sp Q9BSI4 TINF2_HUMAN |
| 8967 | FTGVASGSTGSGSCSVGAK20000000000                         | sp Q9UKI8 TLK1_HUMAN  |
| 8968 | SQSTSDVPANYK200000000000                               | sp Q9NU19 TB22B_HUMAN |
| 8969 | LMLSTSEYSQSPK1000003002000                             | sp Q12888 TP53B_HUMAN |
|      |                                                        | sp P01891 1A68_HUMAN  |
|      |                                                        | sp P01892 1A02_HUMAN  |
| 8970 | KGGSYSQAASSDSAQGS DVSLTACK2002000000                   | sp P05534 1A24_HUMAN  |
|      |                                                        | sp Q09160 1A80_HUMAN  |
|      |                                                        | sp P10316 1A69_HUMAN  |
|      |                                                        | sp P30447 1A23_HUMAN  |
| 8971 | TDPSLDLHLS SAETQPAQEELR2. 0000202E+20                  | sp P11171 41_HUMAN    |
|      |                                                        | sp P49792 RBP2_HUMAN  |
|      |                                                        | sp Q7Z3J3 RGPD4_HUMAN |
|      |                                                        | sp A6NKT7 RGPD3_HUMAN |
| 8972 | DSLITPHVSR2000200                                      | sp PODJD0 RGPD1_HUMAN |
|      |                                                        | sp PODJD1 RGPD2_HUMAN |
|      |                                                        | sp Q99666 RGPD5_HUMAN |
|      |                                                        | sp 014715 RGPD8_HUMAN |
| 8973 | SRSYTPEYR2020200000                                    | sp Q13595 TRA2A_HUMAN |
| 8974 | STGSATSLASQGER200000200200000                          | sp Q5SW79 CE170_HUMAN |
| 8975 | QLGDSSGEGPEFVEEEEEVALRSDSEGS DYTPGK2020020000000       | sp Q14839 CHD4_HUMAN  |
| 8976 | SPLLPCPATK20000000000                                  | sp Q9H2Y7 ZN106_HUMAN |
| 8977 | TEPAAEAEAAASGPSESPSPAEEELPGSHAEPVPAQGEAPGEQAR2E+36     | sp P55884 EIF3B_HUMAN |
| 8978 | STSPTLTPSPSPK2000000000000                             | sp Q68DC2 ANKS6_HUMAN |
| 8979 | AALLKASPK2000                                          | sp P50914 RL14_HUMAN  |
| 8980 | DLESTSRDSLALDK22000000000                              | sp Q5T200 ZC3HD_HUMAN |

|      |                                                     |                       |
|------|-----------------------------------------------------|-----------------------|
|      |                                                     | sp P49792 RBP2_HUMAN  |
|      |                                                     | sp Q7Z3J3 RGPD4_HUMAN |
|      |                                                     | sp O14715 RGPD8_HUMAN |
| 8981 | TEDSDDIHFEFVVQMPEK2000000000000000                  | sp Q99666 RGPD5_HUMAN |
|      |                                                     | sp A6NKT7 RGPD3_HUMAN |
|      |                                                     | sp PODJD0 RGPD1_HUMAN |
|      |                                                     | sp PODJD1 RGPD2_HUMAN |
| 8982 | LGIHEDSTNR20000                                     | sp P08238 HS90B_HUMAN |
| 8983 | SKDVNGPEPLNSR200                                    | sp Q99653 CHP1_HUMAN  |
| 8984 | QASASYDSEEEEEGLPMSYDEK2000000000000000              | sp Q15059 BRD3_HUMAN  |
| 8985 | SFSISPSR2020000                                     | sp P18583 SON_HUMAN   |
| 8986 | IDAGTMAEPSASPSKR200000                              | sp Q8IXQ3 CI040_HUMAN |
| 8987 | VPEPPSSHSQSGSPSSGSPER2000000                        | sp Q8N137 CNTRB_HUMAN |
| 8988 | HSQPSPEPHSPTEPPAWGSSIVK2000000000000000             | sp Q5VZ89 DEN4C_HUMAN |
| 8989 | DTTQSKPVSSPFPTKPLEGQAEGDSGECK2E+21                  | sp Q9UKX7 NUP50_HUMAN |
| 8990 | VEGSPTEEANLPTELQDNSLSPAASEAGEK200000000000          | sp P50851 LRBA_HUMAN  |
| 8991 | AQTTPGPSLSGSKSPCPQEK2000000002000000000             | sp Q9UQ35 SRRM2_HUMAN |
| 8992 | KSPSGPVKSPPLSPVGTTPVK20000000200000                 | sp Q9BVC5 ASHWN_HUMAN |
| 8993 | VEPSSQSPGRSPR2000                                   | sp Q8IUD2 RB612_HUMAN |
| 8994 | ADRDQSPFSK200000                                    | sp Q13427 PPIG_HUMAN  |
| 8995 | KKSSSEAKPTSLGLAGGHK2000000020000000000              | sp Q96RK0 CIC_HUMAN   |
| 8996 | RSPSVSPEPAEK20202200000000                          | sp Q9UQ35 SRRM2_HUMAN |
| 8997 | DHSPTPSVFNSEER200020000000000                       | sp Q6UN15 FIP1_HUMAN  |
| 8998 | RSSPSARPPDVPGQPQAAK2. 2E+19                         | sp Q96JP5 ZFP91_HUMAN |
| 8999 | QSPSPSTRPIR20200000000                              | sp Q8IYB3 SRRM1_HUMAN |
| 9000 | SYQNSPSSDDGIRPLPEYSTEK2. 000202E+22                 | sp Q15648 MED1_HUMAN  |
|      |                                                     | sp P49792 RBP2_HUMAN  |
|      |                                                     | sp Q7Z3J3 RGPD4_HUMAN |
| 9001 | EDALDDSVSSSVHASPLASSPVR2000200000                   | sp A6NKT7 RGPD3_HUMAN |
|      |                                                     | sp Q99666 RGPD5_HUMAN |
|      |                                                     | sp O14715 RGPD8_HUMAN |
| 9002 | LSGSDLGGHSSLER20000000000000                        | sp O95613 PCNT_HUMAN  |
| 9003 | QPSWDPSVPSSTVPAPSPLSAAAVSPSK2000020000000000000     | sp Q9NQC3 RTN4_HUMAN  |
| 9004 | LQEEGGGSEEEETGSPSEDMQSAR20000000020000000000        | sp Q13610 PWP1_HUMAN  |
| 9005 | DNSNSDSEGEDRRPAGPPR20202000000000000000             | sp Q8NCF5 NF2IP_HUMAN |
| 9006 | TPTPSTPGDTQNPNTAPVPPAEDGIK2. 00020002E+21           | sp Q14839 CHD4_HUMAN  |
| 9007 | TRTSSSETEEEKKPEKPLILQSLGPK2. 2E+22                  | sp Q9Y5K6 CD2AP_HUMAN |
| 9008 | DTCYSPKPSVYLSTPSSASK2000000000000000000             | sp Q9Y5K6 CD2AP_HUMAN |
| 9009 | NYQQNYQNSESGEKNEGSESAPEGQAQQR3. 00202E+24           | sp P67809 YBOX1_HUMAN |
| 9010 | SSPGSVAASPSGGGR20000000000000                       | sp Q9BXB5 OSB10_HUMAN |
| 9011 | AAFTTPDHAPLSPQSSVASSGSEQTEEQGSSR2E+21               | sp Q5PRF9 SMAG2_HUMAN |
| 9012 | AAMYDI I SSPSK20000                                 | sp Q6KC79 NIPBL_HUMAN |
| 9013 | QDDSPRP I I GPALPPGFIK20000000000000000000          | sp Q8IXQ4 GPAM1_HUMAN |
| 9014 | VLEDEEGSKDIELSDDPYDCIR20000000000000000000          | sp Q15024 EXOS7_HUMAN |
| 9015 | GSPHYFSPFRPY200000000000000                         | sp Q13242 SRSF9_HUMAN |
| 9016 | SSTPSSPTGTSSSDSGHHIGWGER2. 2E+24                    | sp P46019 KPB2_HUMAN  |
| 9017 | TSISDPPEPPLLPPR2000000000                           | sp Q07889 SOS1_HUMAN  |
| 9018 | LPDLSPVENK2000000                                   | sp Q9Y520 PRC2C_HUMAN |
| 9019 | SAASPVVSSMPERASESSSEEKDDYEIFVK2. 00000000100002E+30 | sp P18583 SON_HUMAN   |
| 9020 | GSVILDSGHLSTASSDDLKGEESFR22022000000000000000       | sp Q92614 MY18A_HUMAN |
| 9021 | HNSWSSSR20000000                                    | sp Q96F86 EDC3_HUMAN  |
| 9022 | LRSFASQSTDR20200000000                              | sp Q9ULJ3 ZBT21_HUMAN |
| 9023 | NSNFSVQHPSSTSPTEK20000000                           | sp Q03468 ERCC6_HUMAN |
| 9024 | NSSDSAIDNPKPNK20000000000                           | sp P46100 ATRX_HUMAN  |

|      |                                                    |                       |
|------|----------------------------------------------------|-----------------------|
| 9025 | SASVSSISLTK2002000000                              | sp Q07889 SOS1_HUMAN  |
| 9026 | ESSEPPAPASSPEAASPTQGPAGTSK2. 2E+26                 | sp Q92766 RREB1_HUMAN |
| 9027 | SPSLLQSGAK200000000                                | sp Q9BQG0 MBB1A_HUMAN |
| 9028 | SPSFGGASEASAR200000000000                          | sp Q8WVT3 TPC12_HUMAN |
| 9029 | RDSSSQLASTESDKPTTGR2202000000000000000             | sp Q96B23 CRO25_HUMAN |
| 9030 | SPTPKSPPSR200200000                                | sp Q9NVD7 PARVA_HUMAN |
| 9031 | DGQSSPQPSPR20002000                                | sp Q5VZK9 LR16A_HUMAN |
| 9032 | DSTSQHDDDNISTTSGFSSRASDKDITVSK22200220020000000000 | sp P49790 NU153_HUMAN |
| 9033 | LQSGVSLASK200200                                   | sp Q09666 AHNK_HUMAN  |
| 9034 | HQASDSENEEPPKPR2000000000000000                    | sp Q96ST2 IWS1_HUMAN  |
| 9035 | SQSGTLDGESAAWSASGEDSR2000000000000000              | sp P49815 TSC2_HUMAN  |
| 9036 | SSSLGSTPHEELER2200022000000000                     | sp Q9NRA8 4ET_HUMAN   |
| 9037 | RKTLDAEVVEKPAK2000000000000000                     | sp Q9H3P2 NELFA_HUMAN |
| 9038 | EPVNLEGDDTSLIHGK20000000                           | sp Q9H2J7 S6A15_HUMAN |
| 9039 | QENCGAQVQVAGPGTSTPPSSPVR200200000                  | sp Q96G46 DUS3L_HUMAN |
| 9040 | EEASLLSHSPGTSNQSQPCSPKPIR20000000000000000000      | sp Q9H4Z3 PCIF1_HUMAN |
| 9041 | DHNVGSPPKSPTHASPHQHTQTEK2000002000000000000000     | sp A0JNW5 UH1BL_HUMAN |
| 9042 | SYLEGSSDNQLKDESTPVDDR200000020000000000            | sp Q9UHI6 DDX20_HUMAN |
| 9043 | SPSSKPSLAVAVDSAPEVAVK20000000000000000000          | sp 060508 PRP17_HUMAN |
| 9044 | SPSPSPAAVNHSSSDISPVSNESTSSSPGK2E+27                | sp 075381 PEX14_HUMAN |
| 9045 | SLENTPPPFTPK2000020002000                          | sp 015085 ARHGB_HUMAN |
| 9046 | TASISSPSEGTPVGSYGCTPQSLPK2. 02E+21                 | sp Q6PKG0 LARP1_HUMAN |
| 9047 | RPDHSGGSPSPPTSEPAR200002000200000                  | sp Q8TAD8 SNIP1_HUMAN |
| 9048 | TPHPSPAHSSR2000200000000                           | sp Q6ZS17 FA65A_HUMAN |
| 9049 | SMSAPVIFDR200000000                                | sp 060749 SNX2_HUMAN  |
| 9050 | EVDGLLTSEPMGSPVSSK102000000                        | sp Q8WWM7 ATX2L_HUMAN |
| 9051 | YSPPIQR2000000                                     | sp Q8IYB3 SRRM1_HUMAN |
| 9052 | SPAAPYFLGSSFSFVR20000000000020000                  | sp P30291 WEE1_HUMAN  |
| 9053 | TSVATQCDEEIIIVLSDSD20200                           | sp Q9UER7 DAXX_HUMAN  |
| 9054 | RQSSDSCSEEPDSTTPPAK22020200000000000000            | sp Q8N1G0 ZN687_HUMAN |
| 9055 | QSVTSFPDADAFHHQVHDDLLSSSEEECK222000000             | sp P50402 EMD_HUMAN   |
| 9056 | LSPERSDSESNENEPHLPHGVSQR2. 20202E+20               | sp Q9BQ52 RNZ2_HUMAN  |
| 9057 | SNVSSPATPTASSSSTPTR20020000000000000000            | sp Q12888 TP53B_HUMAN |
| 9058 | DRQSPLHGNHITISHTQATGSR2E+19                        | sp Q86VQ1 GLC11_HUMAN |
| 9059 | DTHEDHDTSTENTDESNHDPQFEPVIVSLPEQEI2. 002E+22       | sp P43487 RANG_HUMAN  |
| 9060 | EVVKPVPITSPAVSK2000000                             | sp Q96HC4 PDLI5_HUMAN |
| 9061 | DAGGPRPESVPVAGR20000000                            | sp Q9BVG9 PTSS2_HUMAN |
| 9062 | RGNDPLTSSPGR220000                                 | sp P49736 MCM2_HUMAN  |
| 9063 | DTLSNPQSPQSPYNPKPQHK2. 0002000003E+19              | sp Q96PU5 NED4L_HUMAN |
| 9064 | ISHLSGSGGDER200000                                 | sp Q96T37 RBM15_HUMAN |
| 9065 | SKSPPKSPEEEGAVSS20200020000000000000               | sp Q01130 SRSF2_HUMAN |
| 9066 | GEGGEDGEDGLPEGIHLDK20002000000000000000            | sp 075362 ZN217_HUMAN |
| 9067 | TSSKESPISPTSDRK20022000000000000000                | sp Q01082 SPTB2_HUMAN |
| 9068 | QNGSNDSDRYSDNEEDSK200000000                        | sp P42167 LAP2B_HUMAN |
| 9069 | LSGEHSESSTPRPR2000200000                           | sp Q7Z3K3 POGZ_HUMAN  |
| 9070 | SLKESEQESEEEILAQK20000000200000000000              | sp Q9BW71 HIRP3_HUMAN |
| 9071 | STDEYSEADEEEEEEGKPSR2. 20002E+21                   | sp Q96T23 RSF1_HUMAN  |
| 9072 | LFSADPFLEAQAK2000000000000000                      | sp Q5TDH0 DDI2_HUMAN  |
| 9073 | SLTRSPPAIR20202000000                              | sp Q9UQ35 SRRM2_HUMAN |
| 9074 | RLSSASTGKPLSVEDDFEK22000000002000000000            | sp 075152 ZC11A_HUMAN |
| 9075 | GGDSIGETPTPGASK2000002000000                       | sp 075533 SF3B1_HUMAN |
| 9076 | KISENSYSLDDLEIGPGQLSSSTFDSEK2E+23                  | sp Q9UHB6 LIMA1_HUMAN |
| 9077 | HTDDEMTGYVATR20000000                              | sp Q16539 MK14_HUMAN  |
| 9078 | TPSSPPIPPASET22000000000000000000                  | sp Q9NZJ0 DTL_HUMAN   |

|      |                                            |                       |
|------|--------------------------------------------|-----------------------|
| 9079 | TSAQHALTSVSRGSSLK2020000000                | sp P61073 CXCR4_HUMAN |
| 9080 | RGSISSMSSVSVLDEK2020000000000000           | sp Q9H1K0 RBNS5_HUMAN |
| 9081 | KPVTVSPTTPTSPTGEAS200000000000             | sp Q9Y6G9 DC1L1_HUMAN |
| 9082 | RPNKQEESESPVERPLKENPPNK2020000000000000    | sp Q96SB4 SRPK1_HUMAN |
| 9083 | SPSQESIGAR20000000000                      | sp Q8WXE0 CSKI2_HUMAN |
| 9084 | TESVPSDINNVPVDR20000000000000              | sp Q8IVT5 KSR1_HUMAN  |
| 9085 | SRESSPSHGLLK2200000000                     | sp Q96JH7 VCIP1_HUMAN |
| 9086 | KKTVSFSSMPTEK202000000000                  | sp Q9UPRO PLCL2_HUMAN |
| 9087 | TASRPDDIPDPSPPK200000000020000             | sp Q5VZK9 LR16A_HUMAN |
| 9088 | SPQVLGSSLSVR20000000000000                 | sp Q86UU0 BCL9L_HUMAN |
| 9089 | NEGSSIEDAQTSQHATLKPER200000000000          | sp Q9UKL3 C8AP2_HUMAN |
| 9090 | ARNSGTQSDGEEKQPLVMER20002000000000000000   | sp Q6P1M3 L2GL2_HUMAN |
| 9091 | HQEVQDQDPVFGSDSSGYQSDHKKK20020302000000    | sp Q3B726 RPA43_HUMAN |
| 9092 | TPLSSLSATSNNSTVACIDR2000000000000000       | sp P00533 EGFR_HUMAN  |
| 9093 | RNSNSPPSPSSMNQR202002000000000             | sp Q7Z5L9 I2BP2_HUMAN |
| 9094 | LGASNSPGQPNVSK2000002000                   | sp P49756 RBM25_HUMAN |
| 9095 | VKASPIITNDGEDEFVPSDGLDK2.0000000000002E+19 | sp Q02880 TOP2B_HUMAN |
| 9096 | HHQEEDAGPTQPSAKPQLK2000000000              | sp Q9C086 IN80B_HUMAN |
| 9097 | SSSSSGVPYSPAIPNK2000000000000000           | sp Q9UPT5 EXOC7_HUMAN |
| 9098 | MSPGVAGSPR2000000000                       | sp Q15596 NCOA2_HUMAN |
| 9099 | DLLHPSPEEEK2000000                         | sp P42677 RS27_HUMAN  |
| 9100 | SPVDSGTILR200000000000                     | sp P49454 CENPF_HUMAN |
| 9101 | AGLGSPPERPKTSPGSPR2002000                  | sp Q9H6F5 CCD86_HUMAN |
| 9102 | ATSPSSSVSGDFDDGHHSVSTPGPSR2.22E+22         | sp Q86U86 PB1_HUMAN   |
| 9103 | SRSRSPTPSSAGLGSNSAPPIDSR2.02002E+22        | sp Q8IWX8 CHERP_HUMAN |
| 9104 | RNSYTNCLQK2000000000                       | sp Q92766 RREB1_HUMAN |
| 9105 | GYNHGQGSYSYSNSYNSPGGGGSDYNYESK2E+22        | sp Q12906 ILF3_HUMAN  |
| 9106 | THSTSSSLGSGESPFGR2200000000000000          | sp Q9UGV2 NDRG3_HUMAN |
| 9107 | SRSSSVGSSSYPIPAVSR22000000000000000000     | sp Q15149 PLEC_HUMAN  |
| 9108 | LSPSTSGPHSHDYLQER20000000000000000000      | sp Q9HCE1 MOV10_HUMAN |
| 9109 | SPGSPVCR2000000000                         | sp Q86VQ1 GLC11_HUMAN |
| 9110 | LVLSECSR2000200                            | sp Q14202 ZMYM3_HUMAN |
| 9111 | ESPVSAPLEGLICR2000000000000000             | sp Q75376 NCOR1_HUMAN |
| 9112 | GDMSDEDDENEFFDAPEIITMPENLGHK1.2E+26        | sp P22059 OSBP1_HUMAN |
| 9113 | CSDVSELSSPPGPYHQEPYVCKPEER2E+23            | sp Q9Y478 AAKB1_HUMAN |
| 9114 | LSVPTSDEEDEVPAKPR20000000000000000000      | sp Q8NE71 ABCF1_HUMAN |
| 9115 | EDFDTSIESK200200                           | sp Q9NRL2 BAZ1A_HUMAN |
| 9116 | IEIIQPLLDMAAGTSNAAPVAENVNTNNEGSPPPPVK1E+27 | sp Q95104 SFR15_HUMAN |
| 9117 | KTSASDVNTIYPGDAGK2000000000000000          | sp Q15042 RB3GP_HUMAN |
| 9118 | SPSGPVKSPPLSPVGTTPVK20000200000000000000   | sp Q9BVC5 ASHWN_HUMAN |
| 9119 | GSCDSGELGR2000000000                       | sp P48200 IREB2_HUMAN |
| 9120 | TPGHPPPPEIPSELGACDFEKPESPR2000             | sp Q92538 GBF1_HUMAN  |
| 9121 | GGPGAAPGASPASSSSAASSPSSGR200000000000      | sp Q9BXX1 KLF16_HUMAN |
| 9122 | YSPTSPTYSPVYTPSPK30002000                  | sp P24928 RPB1_HUMAN  |
| 9123 | IQSSLSVNSDISK200000                        | sp Q9P1T7 MDFIC_HUMAN |
| 9124 | EGPGSEPDSQVDGGLSGASLGEK2E+19               | sp Q5JSZ5 PRC2B_HUMAN |
| 9125 | RDRSLPR20000                               | sp Q14D04 MELT_HUMAN  |
| 9126 | SLSPVPR20200000                            | sp A2AJT9 CX023_HUMAN |
| 9127 | SQDSYPGSPSLSPR2000000000002000             | sp Q6VN20 RBP10_HUMAN |
| 9128 | LPSGSPSPK2000                              | sp Q9P275 UBP36_HUMAN |
| 9129 | SPEPDTLPLAAGSDHPLPR2000000000000000        | sp Q6PCT2 FXL19_HUMAN |
| 9130 | RNSNSPPSPSSMNQR20200000200000              | sp Q7Z5L9 I2BP2_HUMAN |
| 9131 | SATPPATR202000000                          | sp Q9UQ35 SRRM2_HUMAN |
| 9132 | KRTPSPSYQR200003000                        | sp Q5T200 ZC3HD_HUMAN |

|      |                                                   |                       |
|------|---------------------------------------------------|-----------------------|
| 9133 | VSKSPSPASTSTVPNMTDAPTAPK22000000000000            | sp Q659A1 ICE2_HUMAN  |
| 9134 | VLTQMGSPLNPISSVS100000002020                      | sp Q99717 SMAD5_HUMAN |
| 9135 | GTPPPVFTPLPK2000002000000                         | sp Q6NZY4 ZCHC8_HUMAN |
| 9136 | DPSPEADAPVLGSPEKEEAASEPPAAAPDAAPPPDRPIEK2E+39     | sp O15234 CASC3_HUMAN |
| 9137 | SDDSKSSPELVTHLK20002000000000                     | sp Q07960 RHG01_HUMAN |
| 9138 | VPGSSGHLHK2000000                                 | sp Q9UEW8 STK39_HUMAN |
| 9139 | LFQLGPPSPVK20000                                  | sp O95997 PTTG1_HUMAN |
| 9140 | EQSSDLTPSGDVSPVKPLSR2000000000200000000           | sp Q9NZH5 PTTG2_HUMAN |
| 9141 | SYISPHSSSHTPTR2002000000000                       | sp Q8WYQ5 DGCR8_HUMAN |
| 9142 | GISSDGESN2000200                                  | sp Q96BY7 ATG2B_HUMAN |
| 9143 | TDSQSVRHSP IAPSSPSPQVLAQK20000200000000000        | sp Q9BW71 HIRP3_HUMAN |
| 9144 | CSATPSAQVKPIVSASPPSR200000                        | sp Q9NQS7 INCE_HUMAN  |
| 9145 | LLEENETEAVTVPTSPPTVR2000000                       | sp Q96EV2 RBM33_HUMAN |
| 9146 | YSDGDKSDDLVDVSNEDPATPR3E+24                       | sp Q9UHR4 BI2L1_HUMAN |
| 9147 | AAAAGLHPASPGSEDGPPGSEEDAAR2.00020000002E+19       | sp Q04726 TLE3_HUMAN  |
| 9148 | SPSPDGSPAATPEIR20000000000000000                  | sp Q99856 ARI3A_HUMAN |
| 9149 | TLETQLAPDCCPSDQDPAPAHSPHSPMNK2000200000           | sp 000499 BIN1_HUMAN  |
| 9150 | NNESQWKDSPLATR2000000                             | sp Q9BUR4 WAP53_HUMAN |
| 9151 | SRSPTPQNQDGMTVEK200000000000000                   | sp O95155 UBE4B_HUMAN |
| 9152 | AVPVESPVQK200000                                  | sp Q3KR37 GRM1B_HUMAN |
| 9153 | SGSSPDSEITELK2220020000000                        | sp Q8TB61 S35B2_HUMAN |
| 9154 | LPEGSPWLGISCSYER200000000000000                   | sp P17812 PYRG1_HUMAN |
| 9155 | YTPPTQPPISPPYQEAETLK200000000000                  | sp Q13506 NAB1_HUMAN  |
| 9156 | HKSGSMEEDVDTSPGGDYITSPSSPTSSSR1.0000000000033E+25 | sp Q9UET6 TRM7_HUMAN  |
| 9157 | KLSHDAESEREDPAPAK2000020000000000                 | sp P08651 NFIC_HUMAN  |
| 9158 | RLSPSASPPR20000                                   | sp Q92766 RREB1_HUMAN |
| 9159 | MAPPVDDLSPK2000                                   | sp Q8IYB3 SRRM1_HUMAN |
| 9160 | SPGSPVGEETGSPPK2002000000000000                   | sp Q92576 PHF3_HUMAN  |
| 9161 | EKPELSEPHLNGPSSDPEAAFLSR220000000000              | sp P35611 ADDA_HUMAN  |
| 9162 | KSASSEAEANLEAQPQSTVRPEEIPPIENR2.02202E+31         | sp Q9H4A3 WNK1_HUMAN  |
| 9163 | RKPSTSDSDSNFEK2220020000000                       | sp Q13427 PIG_HUMAN   |
| 9164 | LIDLESPTESQK2000000                               | sp P11388 TOP2A_HUMAN |
| 9165 | FTDKDQPSGSEGEDDDAEALKK2000000000000000            | sp O43166 SI1L1_HUMAN |
| 9166 | SPSPYYSR2000000                                   | sp Q9NXG2 THUM1_HUMAN |
| 9167 | AQEPPAGGGSIHDLPLFTETSPTSAPWDPLPGPPVLPSPHSHL2E+22  | sp Q13595 TRA2A_HUMAN |
| 9168 | TGSLSDYSR20000000                                 | sp P62995 TRA2B_HUMAN |
| 9169 | HQDGLPYIDDPSSPHLSSK2020000000                     | sp Q9NRG9 AAAS_HUMAN  |
| 9170 | SPSSPELNNK220000000                               | sp Q9Y2Y9 KLF13_HUMAN |
| 9171 | RLSSSLNPSK220000000                               | sp P11274 BCR_HUMAN   |
| 9172 | SPLTGYVR200000000                                 | sp Q9UQ35 SRRM2_HUMAN |
| 9173 | SLPTTVPESPNYR20000000000                          | sp Q13535 ATR_HUMAN   |
| 9174 | RPAEATSSPTSPERPR202002000000                      | sp Q9NP66 HM20A_HUMAN |
| 9175 | RGSLSNAGDPEIVK2000000000000                       | sp Q6PKG0 LARP1_HUMAN |
| 9176 | LSPERSSDESNEPHLPHGVSQR2.0202E+19                  | sp Q9BU76 MMTA2_HUMAN |
| 9177 | SPHQLLSPSSFSPSATPSQK2E+20                         | sp O43847 NRDC_HUMAN  |
| 9178 | EKDSPFKPK2000000                                  | sp Q9BQ52 RNZ2_HUMAN  |
| 9179 | KLSLSEK2000000                                    | sp Q14181 DPOA2_HUMAN |
| 9180 | NQSPTEAEKPASSSLPSSPPPQLLTR2000000000              | sp Q15291 RBBP5_HUMAN |
| 9181 | NLVSPAYCTQESREEIPGGEAR200000000000000             | sp Q49A26 GLYR1_HUMAN |
|      |                                                   | sp Q99567 NUP88_HUMAN |
|      |                                                   | sp Q9NUQ3 TXLNG_HUMAN |



|      |                                                     |                       |
|------|-----------------------------------------------------|-----------------------|
|      |                                                     | sp P49792 RBP2_HUMAN  |
|      |                                                     | sp Q7Z3J3 RGPD4_HUMAN |
| 9182 | EDALDDSVSSSSVHASPLASSPVR2000200000                  | sp A6NKT7 RGPD3_HUMAN |
|      |                                                     | sp O14715 RGPD8_HUMAN |
|      |                                                     | sp Q99666 RGPD5_HUMAN |
| 9183 | YVISDEEEEDDD2000000000                              | sp Q8WVC0 LEO1_HUMAN  |
| 9184 | SRTASGSSVTSLDGTR202022000000000                     | sp Q92597 NDRG1_HUMAN |
| 9185 | SLENETLNKEEDCHSPTSKPPKPDQPLK2.00000000000002E+28    | sp P23588 IF4B_HUMAN  |
| 9186 | QPLLGPGLGPGLGASWR2000                               | sp Q96SL1 DIRC2_HUMAN |
| 9187 | SSSQRSPSPGNHTSNSSNASNATVVPQNSSAR2200200000000000000 | sp Q9BTA9 WAC_HUMAN   |
|      |                                                     | sp Q13595 TRA2A_HUMAN |
| 9188 | RSPSPYYSR2000000                                    | sp P62995 TRA2B_HUMAN |
|      |                                                     | sp Q15696 U2AFM_HUMAN |
| 9189 | DIYLSPDR20000                                       | sp Q8N6T3 ARFG1_HUMAN |
| 9190 | SSDSWEVWGSASTNR2000000000000                        | sp Q96HA1 P121A_HUMAN |
| 9191 | SPPPRSPPSPPTHR20002000000                           | sp Q13435 SF3B2_HUMAN |
| 9192 | KGFEHHKSDDDSSDDEQEK2000220000000                    | sp Q15149 PLEC_HUMAN  |
| 9193 | SSSVGSSSSYPISPAISR2200000000000                     | sp Q92667 AKAP1_HUMAN |
| 9194 | SLLSSPTK20000                                       | sp P16989 YBOX3_HUMAN |
| 9195 | RPRPPNAPSQDQK200000                                 | sp Q5VZ89 DEN4C_HUMAN |
| 9196 | KSSTGSISNVLFSTQDPVEDAVFGAATNLKK2.02E+28             | sp O75592 MYCB2_HUMAN |
| 9197 | NSVQSGESDSDEEEESKEPPIK2002020000000000000           | sp P45973 CBX5_HUMAN  |
| 9198 | RTADSSSEDEEEYVVEK222200000000000                    | sp P30510 1C14_HUMAN  |
|      |                                                     | sp Q9TNN7 1C05_HUMAN  |
|      |                                                     | sp P04222 1C03_HUMAN  |
|      |                                                     | sp Q07000 1C15_HUMAN  |
|      |                                                     | sp Q29865 1C18_HUMAN  |
| 9199 | GGSCSQAASSNSAQGSDESLIACKA200020020000000            | sp Q29960 1C16_HUMAN  |
|      |                                                     | sp Q29963 1C06_HUMAN  |
|      |                                                     | sp P30504 1C04_HUMAN  |
|      |                                                     | sp P30505 1C08_HUMAN  |
|      |                                                     | sp P30508 1C12_HUMAN  |
|      |                                                     | sp Q95604 1C17_HUMAN  |
| 9200 | INPDNYGMDLNSDDSTDDEAHPR3000000002200000000          | sp Q9NQS7 INCE_HUMAN  |
| 9201 | RLSPSASPPR200000000                                 | sp Q8IYB3 SRRM1_HUMAN |
| 9202 | LLELQEVDSLRL20000                                   | sp P16144 ITB4_HUMAN  |
| 9203 | SFGSPNR20000                                        | sp P50613 CDK7_HUMAN  |
| 9204 | SLPSTSTSSTKR2000000                                 | sp Q12857 NFIA_HUMAN  |
| 9205 | VVNANQNASPNVPGK20000000                             | sp Q8IWI9 MGAP_HUMAN  |
| 9206 | GECSGPATVNNSSDTEIPSPHTEAAK20200200000000            | sp Q9Y618 NCOR2_HUMAN |
| 9207 | QSNVAAPGDATPPAEK2000000                             | sp Q96QC0 PP1RA_HUMAN |
| 9208 | GSPQSAALSSGLLASAAASSR2000000000000                  | sp Q12948 FOXC1_HUMAN |
| 9209 | ELNFVTDVSEQELPSSPK2000                              | sp Q8TAP6 CEP76_HUMAN |
| 9210 | KDEETESEYDSEHENSEPVTNIR2.0000302E+20                | sp Q15154 PCM1_HUMAN  |
| 9211 | SYTPEYR20200000                                     | sp Q13595 TRA2A_HUMAN |
| 9212 | GPTSSPCEEEGDEGEEDRTSDLR2.2E+20                      | sp Q86VM9 ZCH18_HUMAN |
| 9213 | VVVSPTKK2000                                        | sp P19338 NUCL_HUMAN  |
| 9214 | SFSPKSPLELGEK200200000000                           | sp Q15742 NAB2_HUMAN  |
| 9215 | TPTPSTPGDTQPNTAPVPPAEDGIK2.0000002E+24              | sp Q14839 CHD4_HUMAN  |
| 9216 | AVSPLDPSK20000000                                   | sp Q14865 ARI5B_HUMAN |
| 9217 | SPSHSSNRPTPTSTGGSK2000020000000000                  | sp Q15648 MED1_HUMAN  |
| 9218 | ESIPSLPQSPMR20000                                   | sp Q8NEZ4 KMT2C_HUMAN |
| 9219 | HTEDTISVASSLHSSPPASPQGSPhK2000200000000             | sp Q8TEU7 RPGF6_HUMAN |
| 9220 | NSEEEEEKKK20000000000                               | sp Q14978 NOLC1_HUMAN |

|      |                                                                     |    |           |             |
|------|---------------------------------------------------------------------|----|-----------|-------------|
| 9221 | SNPKSPQKPIVR200000000                                               | sp | P15056    | BRAF_HUMAN  |
| 9222 | ADVQLFMDDSYSHHSGLEYADPEK20020000000000                              | sp | P51636    | CAV2_HUMAN  |
| 9223 | RSSQPSPTAVPASDSPPTK200000000000000000                               | sp | Q3KQU3    | MA7D1_HUMAN |
| 9224 | GEDSAEETEAKPAVVAPAVVEAVSTPSAAFPSDATAEQGPILTK200000000<br>0000000000 | sp | Q12906    | ILF3_HUMAN  |
| 9225 | QNGSNDSDRYSDNEEDSKIELK2. 000003E+19                                 | sp | P42167    | LAP2B_HUMAN |
| 9226 | SISPEVSASR2000000000                                                | sp | Q9Y2F5    | ICE1_HUMAN  |
| 9227 | SPSPSPAAVNHSSSDISPVSNESTSSSPGK20000                                 | sp | 075381    | PEX14_HUMAN |
| 9228 | SGYSSPGSPGTPGSR200000000000                                         | sp | TAU_HUMAN |             |
| 9229 | ISSVPNSLSK200000000                                                 | sp | P10636    | TAU_HUMAN   |
| 9230 | SPTLSQVHSPLVTSPSANLK2E+20                                           | sp | Q5VZ89    | DEN4C_HUMAN |
| 9231 | SVSASSGPCSPAAPHPPPPR2. 002E+19                                      | sp | Q86UU0    | BCL9L_HUMAN |
| 9232 | AQSLSTDR20000000                                                    | sp | Q86UY5    | FA83A_HUMAN |
| 9233 | MSVDAVEIETLR200000000000                                            | sp | 000231    | PSD11_HUMAN |
| 9234 | TPHYGSQTPLHDGSR2000000000000000                                     | sp | P78347    | GTF2I_HUMAN |
| 9235 | WRPHSPDGPR2000000                                                   | sp | 000267    | SPT5H_HUMAN |
| 9236 | TAPTLSPEHWK2000000                                                  | sp | Q6Y7W6    | PERQ2_HUMAN |
| 9237 | AHFNAMFQPSSPTR20000                                                 | sp | Q96JM3    | CHAP1_HUMAN |
| 9238 | AQTPPISSLPTSPSDEVGR2000200000000                                    | sp | Q8WUA4    | TF3C2_HUMAN |
| 9239 | EASAESDVGKSESEFTQYTTTHILK2. 00200002E+24                            | sp | Q15751    | HERC1_HUMAN |
| 9240 | HRSNSFSDER200020000                                                 | sp | P28290    | SSFA2_HUMAN |
| 9241 | YSPTSPTYSPVYPTSPK220030000000                                       | sp | Q09666    | AHNK_HUMAN  |
| 9242 | IACKSPPPEMDTPTSTR2000000000000000                                   | sp | P24928    | RPB1_HUMAN  |
| 9243 | KPVTVSPPTPTSPTEGEAS202200000000000                                  | sp | P46013    | KI67_HUMAN  |
| 9244 | EGSTSSLEPEPDTEK222000000000000                                      | sp | Q9Y6G9    | DC1L1_HUMAN |
| 9245 | LKSSTSFANIQENSN202000000000000                                      | sp | Q9COH5    | RHG39_HUMAN |
| 9246 | SSGDPEQIKEDSLSEESADAR20000200000                                    | sp | Q86WC4    | OSTM1_HUMAN |
| 9247 | AGEPNSPDAEANS PDV TAGCDPAGVHPPR2. 000000000002E+25                  | sp | Q9BVS4    | RIOK2_HUMAN |
| 9248 | STPPSPTHR2002000000                                                 | sp | Q08J23    | NSUN2_HUMAN |
| 9249 | GSVPLSSPPATHFPDETEITNPVK2. 0002E+19                                 | sp | A8CG34    | P121C_HUMAN |
| 9250 | SYEDMIGEEVPSDQYYWAPLAQHER2E+25                                      | sp | P11388    | TOP2A_HUMAN |
| 9251 | DAEPQPGSPA AESLEEPDAAAGLSSTK200000000000000                         | sp | 060716    | CTND1_HUMAN |
| 9252 | LNSVQSSERPLFLVHPIEGSTTVFHSLSR2E+24                                  | sp | Q9H9J4    | UBP42_HUMAN |
| 9253 | RPSASSPNNNTAAK2000000000                                            | sp | P49327    | FAS_HUMAN   |
| 9254 | MGQAPSQSLPPAQDQPRSPVPSAFSDQSR2E+23                                  | sp | 075151    | PHF2_HUMAN  |
| 9255 | RSSLSPGR2020000                                                     | sp | Q9UQ35    | SRRM2_HUMAN |
| 9256 | RNSDRSEDGYHSDGDYGEHDYR200030200000000000                            | sp | Q9BUQ8    | DDX23_HUMAN |
| 9257 | EGEDGDQPTTPKPLK200000000                                            | sp | P52756    | RBM5_HUMAN  |
| 9258 | HSDTSPRR200200000                                                   | sp | P18858    | DNL11_HUMAN |
| 9259 | HFEASCGQLSPAR2000000000                                             | sp | Q9BRD0    | BUD13_HUMAN |
| 9260 | FDSSLLSSDDETK2000000                                                | sp | Q96N21    | AP4AT_HUMAN |
| 9261 | TLSSSSMDLSR200000000                                                | sp | P28715    | ERCC5_HUMAN |
| 9262 | AEGIEGETLTASPQAPGSPEDSEGVLISLPR2. 000002E+21                        | sp | Q9H0B6    | KLC2_HUMAN  |
| 9263 | SPSEESAPTTSPESVSGVSPSSGSSGR200200000000000000                       | sp | Q5T011    | SZT2_HUMAN  |
| 9264 | LNFDMTASPK2000                                                      | sp | P54725    | RD23A_HUMAN |
| 9265 | TSASDVTNIYPGDAGK200000000000000000                                  | sp | Q9ULU4    | PKCB1_HUMAN |
| 9266 | HCGLSLSSTPPGK2002000000                                             | sp | Q15042    | RB3GP_HUMAN |
| 9267 | TEAPGTPEGPEPERPSPGDGNPR200000000000000000                           | sp | Q71F23    | CENPU_HUMAN |
| 9268 | SEESD TDTSERQDDSYIEPEVPLK2. 00002022000002E+26                      | sp | Q9Y666    | S12A7_HUMAN |
| 9269 | SQTTTERDSDTDVEEELPVENR2. 20002E+20                                  | sp | Q9BZF1    | OSBL8_HUMAN |
| 9270 | NEMGIPQTTSPENAGPQNTK200000000000                                    | sp | Q14676    | MDC1_HUMAN  |
| 9271 | SYSPDGKESPSDKK202000002000000                                       | sp | Q15398    | DLGP5_HUMAN |
| 9272 | HASPILPITEFS DIPR2000000000000000                                   | sp | P43243    | MATR3_HUMAN |
|      |                                                                     | sp | P42167    | LAP2B_HUMAN |

|      |                                                        |    |        |             |
|------|--------------------------------------------------------|----|--------|-------------|
| 9273 | QQSTSSDRVSTPESLDFLK220000000000000000                  | sp | Q12965 | MYO1E_HUMAN |
| 9274 | SPVGSAGPQAAAPAPAAHVAGNPGGDAAPAATGTAASLATAAGSEDAEK2E+51 | sp | P16989 | YBOX3_HUMAN |
| 9275 | GGSEGGPESSTASNSVPPPPQGGSGR2E+24                        | sp | Q9P206 | K1522_HUMAN |
| 9276 | GGAAGGALPTSPGPALGAK2000000000                          | sp | Q9UPR0 | PLCL2_HUMAN |
| 9277 | QSVTSFPDADAFHHQVHDDLLSSSEEECK2E+29                     | sp | P50402 | EMD_HUMAN   |
| 9278 | SQDATFSPGSEQAEKSPGPIVSR200200000000000000              | sp | Q86WB0 | NIPA_HUMAN  |
| 9279 | KSSTSDWPTDNQDGDGK2000000000000000                      | sp | Q92794 | KAT6A_HUMAN |
| 9280 | RHSSDINHVLVTQGRESPEGSYTDANQEV2. 00002E+20              | sp | Q5TON5 | FBP1L_HUMAN |
|      |                                                        | sp | P49792 | RBP2_HUMAN  |
|      |                                                        | sp | Q7Z3J3 | RGPD4_HUMAN |
| 9281 | LNQSGTSSVGTDEESDVTQEEER20020002000000000               | sp | A6NKT7 | RGPD3_HUMAN |
|      |                                                        | sp | P0DJD0 | RGPD1_HUMAN |
|      |                                                        | sp | P0DJD1 | RGPD2_HUMAN |
| 9282 | EAKPGAAPEVGVPSLSPSSPSSWTETDVEER2000000000000000        | sp | Q6L8Q7 | PDE12_HUMAN |
| 9283 | SKSPSPR202000000                                       | sp | Q9UKV3 | ACINU_HUMAN |
| 9284 | DGSDYDPYDFSDTEEMPQVHTPK200000000002000                 | sp | P25205 | MCM3_HUMAN  |
| 9285 | KKTVSASESEDR20200000000                                | sp | Q9ULG6 | CCPG1_HUMAN |
| 9286 | FSGFSAKPNSGEAPSSPTPK2000000                            | sp | P49916 | DNLI3_HUMAN |
| 9287 | GAGATSGSPAGR200000000                                  | sp | P16455 | MGMT_HUMAN  |
| 9288 | YSPSQNSPIHHIPSR2020000000000000                        | sp | Q9NYF8 | BCLF1_HUMAN |
| 9289 | SPGSGSQSSGWHEVEPGMPSPTLKK2E+26                         | sp | Q12857 | NF1A_HUMAN  |
| 9290 | SAASPVVSSMPERASESSSEKDDYEIFVK2. 000002022E+22          | sp | P18583 | SON_HUMAN   |
| 9291 | RGSLEMSDGEPLSR2000000000000000                         | sp | Q6ZN18 | AEBP2_HUMAN |
| 9292 | LPSSPASPSK202000                                       | sp | Q9H4G0 | E41L1_HUMAN |
| 9293 | ARHDPDPSPLR200020000                                   | sp | Q9BRD0 | BUD13_HUMAN |
| 9294 | DEPPPLSPAPLTPATPSSLDPFPSR2. 00002E+19                  | sp | Q7Z6Z7 | HUWE1_HUMAN |
| 9295 | KRSEGFMDR200001000                                     | sp | Q7Z4V5 | HDGR2_HUMAN |
| 9296 | SIQPQVSPR2000                                          | sp | Q13322 | GRB10_HUMAN |
| 9297 | ASAPERTPSPAPK20200000                                  | sp | Q63ZY6 | NSN5C_HUMAN |
| 9298 | GYSSPEPDIQDSSGSEAQSVKPSTR3. 020000002202E+24           | sp | Q9BZF1 | OSBL8_HUMAN |
| 9299 | RRSPSPYYSR200000000                                    | sp | Q13595 | TRA2A_HUMAN |
|      |                                                        | sp | P62995 | TRA2B_HUMAN |
| 9300 | SPVSPLAAQGIPLPAQLTK2. 002E+19                          | sp | Q96SI1 | KCD15_HUMAN |
| 9301 | MSDSESEELPKPQVSDSESEPPR2. 020000000002E+23             | sp | Q96ST2 | IWS1_HUMAN  |
| 9302 | RPASPSPEHLPATPAESPAQR20000002000000000                 | sp | Q9H7L9 | SDS3_HUMAN  |
| 9303 | VEGSPTEANLPTQLDNSLSPAASEAGEK2000002020000000000        | sp | P50851 | LRBA_HUMAN  |
| 9304 | TDSTSDGRPAWMR200000000100                              | sp | Q14204 | DYHC1_HUMAN |
| 9305 | SPCETISSPSTLESK2000000000                              | sp | Q9C0D5 | TANC1_HUMAN |
| 9306 | HTTENKPHSPKTPEPR200200000                              | sp | P54278 | PMS2_HUMAN  |
|      |                                                        | sp | Q68D20 | PMS2L_HUMAN |
| 9307 | SYTSDLQK200000000                                      | sp | Q8WWI1 | LMO7_HUMAN  |
| 9308 | FHSSDSEEEHKK20200000000                                | sp | Q96ST2 | IWS1_HUMAN  |
| 9309 | SPTSPSPPRNSDQEGGGK2. 02020200002E+19                   | sp | Q8IYB3 | SRRM1_HUMAN |
| 9310 | ALEAASLSQHPPSLCISDSEEEEEER2. 00000000002E+19           | sp | Q43159 | RRP8_HUMAN  |
| 9311 | IRHSSDTSPPR220200000                                   | sp | Q9BRD0 | BUD13_HUMAN |

|      |                                                    |                       |
|------|----------------------------------------------------|-----------------------|
|      |                                                    | sp Q9TNN7 1C05_HUMAN  |
|      |                                                    | sp P04222 1C03_HUMAN  |
|      |                                                    | sp Q07000 1C15_HUMAN  |
|      |                                                    | sp Q29865 1C18_HUMAN  |
|      |                                                    | sp Q29960 1C16_HUMAN  |
| 9312 | GGSCSQAASSNSAQGSDESLIACK20002002000000             | sp Q29963 1C06_HUMAN  |
|      |                                                    | sp P30504 1C04_HUMAN  |
|      |                                                    | sp P30505 1C08_HUMAN  |
|      |                                                    | sp P30508 1C12_HUMAN  |
|      |                                                    | sp P30510 1C14_HUMAN  |
|      |                                                    | sp Q95604 1C17_HUMAN  |
| 9313 | EVEEDESEDEEMSEDEEDDSSGEEVVIPQK2.00000000000022E+24 | sp P19338 NUCL_HUMAN  |
| 9314 | MCESSPPESADTPTSTR20000000000000                    | sp P46013 KI67_HUMAN  |
| 9315 | DVLLSSSSR200200                                    | sp Q9Y2X9 ZN281_HUMAN |
| 9316 | TASQLENKPVK2002000000                              | sp P30414 NKTR_HUMAN  |
| 9317 | AAATGNASPGKLEHSK2000000000                         | sp Q8NB78 KDM1B_HUMAN |
| 9318 | EWYQSTIPQSPSPAPDDPEEGR3.000000002E+20              | sp Q08499 PDE4D_HUMAN |
| 9319 | ATSPSSSVSGDFDDGHHSVSTPGPSR2.022E+24                | sp Q86U86 PB1_HUMAN   |
| 9320 | GSPEPSALPPQR200000000000                           | sp 000562 PITM1_HUMAN |
| 9321 | SGAVQGAGSLGPGSPVR20000                             | sp Q9P270 SLAI2_HUMAN |
| 9322 | TEFLHSQNSLSR200000                                 | sp Q96FS4 SIPA1_HUMAN |
| 9323 | QQSTSSDRVSQTPESLDFLK202000000000                   | sp Q12965 MYO1E_HUMAN |
| 9324 | SSGSPYGGGYGSGGGSGGYGSR30000000000000               | sp P51991 ROA3_HUMAN  |
| 9325 | SSPPASPTIIPR200020000000                           | sp P80192 M3K9_HUMAN  |
|      |                                                    | sp P10636 TAU_HUMAN   |
| 9326 | TPPKSPSSAK20002000000                              | sp TAU_HUMAN          |
| 9327 | KRPEPSSDYDLSPAK2000020000                          | sp Q6W2J9 BCOR_HUMAN  |
| 9328 | SPPPPPPPPR200000000000                             | sp Q5T5P2 SKT_HUMAN   |
| 9329 | RRSSTVAPAQPDAESEWTDVETR2.2E+22                     | sp Q02241 KIF23_HUMAN |
| 9330 | HSQSPEPHSPTPEPPAWGSSIVK2.00000002E+22              | sp Q5VZ89 DEN4C_HUMAN |
| 9331 | TDDEFVPSDASPPK2000000000020000                     | sp P11388 TOP2A_HUMAN |
| 9332 | LTNLSSNSDV2002000                                  | sp Q13641 TPBG_HUMAN  |
| 9333 | TAPSSPLTSPSDTR22000000                             | sp Q8IWB9 TEX2_HUMAN  |
| 9334 | SLSLGDKEISR2000000000                              | sp Q9UMZ2 SYNRG_HUMAN |
| 9335 | ERFSPPR20000                                       | sp Q9BXP5 SRRT_HUMAN  |
| 9336 | FLMPEAYPSSPR2000                                   | sp 043166 SIIL1_HUMAN |
| 9337 | SSLSSHSHQSQIYR200000000000                         | sp 015027 SC16A_HUMAN |
| 9338 | DAPTSPASVASSSSTPSSK2002000000000000                | sp Q04726 TLE3_HUMAN  |
| 9339 | SGPKPFSAPKPKQTSPSPKR20020000                       | sp Q01518 CAP1_HUMAN  |
|      |                                                    | sp P49792 RBP2_HUMAN  |
|      |                                                    | sp Q7Z3J3 RGPD4_HUMAN |
| 9340 | EDALDDSVSSSVHASPLASSPVRK200000                     | sp A6NKT7 RGPD3_HUMAN |
|      |                                                    | sp 014715 RGPD8_HUMAN |
|      |                                                    | sp Q99666 RGPD5_HUMAN |
| 9341 | SPYKFPSSPLR200000200000                            | sp P06400 RB_HUMAN    |
| 9342 | VTGTEGSSSTLVDYTSTSTGGSPVRK200000                   | sp Q7Z6E9 RBBP6_HUMAN |
| 9343 | GLWSTDAEEDKETK2000000000                           | sp Q99549 MPP8_HUMAN  |
| 9344 | GRPSSPRTPLYLQPDAYGSLDR200200000000000000           | sp Q8WUF5 IASPP_HUMAN |
| 9345 | RPGNSTVTSSPPVTPK20002000                           | sp Q7Z2Z1 TICRR_HUMAN |
| 9346 | SNSVSLVPPGSSHTLPR2000000000000000                  | sp Q6R327 RICTR_HUMAN |
| 9347 | EANPTPLTPGASSLSQLGAYLSDSDSNGSN200200200            | sp Q9BW85 CCD94_HUMAN |

|      |                                                 |                         |
|------|-------------------------------------------------|-------------------------|
|      |                                                 | sp Q562R1 ACTBL_HUMAN   |
|      |                                                 | sp Q6S8J3 POTEE_HUMAN   |
|      |                                                 | sp A5A3E0 POTEF_HUMAN   |
|      |                                                 | sp Q9BYX7 ACTBM_HUMAN   |
| 9348 | SYELPDGQVITIGNER2000000000000000                | sp P60709 ACTB_HUMAN    |
|      |                                                 | sp P62736 ACTA_HUMAN    |
|      |                                                 | sp P63261 ACTG_HUMAN    |
|      |                                                 | sp P63267 ACTH_HUMAN    |
|      |                                                 | sp P68032 ACTC_HUMAN    |
|      |                                                 | sp P68133 ACTS_HUMAN    |
| 9349 | TTCMSSQGSDDQIKR200000000000                     | sp Q9P0V9 SEP10_HUMAN   |
| 9350 | ATSEVPGSQASPNPVPDGLHR200000000000               | sp Q96GM8 TOE1_HUMAN    |
| 9351 | HSSDINHLYTQGRESPEGSYDDANQEVNR200000000000       | sp Q5TON5 FBP1L_HUMAN   |
| 9352 | SRGSGHSQEQPAPQPSGGDPSPPQER2E+23                 | sp Q8WXE0 CSKI2_HUMAN   |
| 9353 | ATSPSSSVSGDFDDGHHSVSTPGPSR2E+25                 | sp Q86U86 PB1_HUMAN     |
| 9354 | HVTLPSSPR22000                                  | sp Q5T4S7 UBR4_HUMAN    |
| 9355 | AEQPSPNSDSGQDAHPDPDANPDAAR2.000002E+23          | sp Q9BUA3 CK084_HUMAN   |
|      |                                                 | sp P22612 KAPCG_HUMAN   |
| 9356 | TWTLCGTPEYLAPEIILSK2E+19                        | sp P22694 KAPCB_HUMAN   |
|      |                                                 | sp P17612 KAPCA_HUMAN   |
| 9357 | LGMLSPEGTCK1020000000                           | sp P49327 FAS_HUMAN     |
| 9358 | AVAITQSPSSVR2000000                             | sp P15822 ZEP1_HUMAN    |
| 9359 | SFELPPYTPPPILSPVR300000020000                   | sp Q6PJG2 EMSA1_HUMAN   |
| 9360 | FICVPTTCSNTIDLPMSPR2000                         | sp P40763 STAT3_HUMAN   |
| 9361 | CALSSPSLAFTPPIK200000200000                     | sp Q8NFH5 NUP53_HUMAN   |
| 9362 | SFSISPVR2020000                                 | sp P18583 SON_HUMAN     |
| 9363 | NKPGPNIESGNEDDDASFK200000002000                 | sp Q060841 IF2P_HUMAN   |
| 9364 | SHTSEGAHLDITPNSGAAGNSAGPK2.02E+25               | sp Q92597 NDRG1_HUMAN   |
| 9365 | GGGAGGSSVGTGGGGTGGVGGGAGSEDSGDR20000000         | sp Q06587 RING1_HUMAN   |
| 9366 | LSSSPGATVSPSSSDAEYDKLPDADLAR2.0202E+21          | sp Q8NI08 NCOA7_HUMAN   |
| 9367 | NFKPSPSK20000                                   | sp Q9BX63 FANCI_HUMAN   |
| 9368 | GPSPSPVGPASVAQSR2000002000000000                | sp Q014497 ARI1A_HUMAN  |
| 9369 | SLSPLGGRDDSPVSHR20200000002000000               | sp Q14004 CDK13_HUMAN   |
| 9370 | SETSSNPSSPEICPNK2200000000                      | sp Q684P5 RPGP2_HUMAN   |
| 9371 | GQEVETSVTYR20000000                             | sp Q043169 CYB5B_HUMAN  |
| 9372 | RLTSPAPR2200000                                 | sp Q6A6NMS7 L37A1_HUMAN |
|      |                                                 | sp P10636 TAU_HUMAN     |
| 9373 | VAVVRTPPKSPSSAK20002000000                      | sp TAU_HUMAN            |
| 9374 | NSVLSDPGLDSPRTSPVIMAR200000000020000000         | sp Q015085 ARHGB_HUMAN  |
| 9375 | SPGSTPTTSSQAPQK20000000000000                   | sp P35658 NU214_HUMAN   |
| 9376 | SPQPDPVDTPASTK200000002000000                   | sp P46013 KI67_HUMAN    |
| 9377 | GRLSVASTPISQR20002002000                        | sp Q9BXS6 NUSAP_HUMAN   |
| 9378 | ASPTLDFTER2000000000                            | sp Q043426 SYNJ1_HUMAN  |
| 9379 | EEGAAPSPHVAELATMEVESAR2000000000000000          | sp Q9NRS6 SNX15_HUMAN   |
| 9380 | KPGPPLSPEIRSPAGSPELR200002000200000             | sp Q96JM3 CHAP1_HUMAN   |
| 9381 | SPQTLAPVGEDAMKTPSPAEDAREPEAK2.0000000000102E+29 | sp Q92797 SYMPK_HUMAN   |
| 9382 | EGDPVSLSTPLETEFGSPSELSR2E+19                    | sp Q9BUR4 WAP53_HUMAN   |
| 9383 | DDISEIQLSLASDHSGRSHDRPPR20020020000000          | sp Q07157 ZO1_HUMAN     |
|      |                                                 | sp P05534 1A24_HUMAN    |
|      |                                                 | sp P30447 1A23_HUMAN    |
| 9384 | GGSYSQAASSDSAQGSVSLTACK3.00000002E+21           | sp P01891 1A68_HUMAN    |
|      |                                                 | sp P01892 1A02_HUMAN    |
|      |                                                 | sp Q09160 1A80_HUMAN    |
|      |                                                 | sp P10316 1A69_HUMAN    |

|      |                                                   |                       |
|------|---------------------------------------------------|-----------------------|
| 9385 | RNSNSPPSPSSMNQR200200000000                       | sp Q7Z5L9 I2BP2_HUMAN |
| 9386 | QESCLGNSPPFEK2000000                              | sp Q86W56 PARG_HUMAN  |
| 9387 | KKSSSEAKPTSLGLAGGHK2000002000000000               | sp Q96RK0 CIC_HUMAN   |
| 9388 | KVSWSGR200000                                     | sp P51798 CLCN7_HUMAN |
| 9389 | SGGIVISPF20000                                    | sp Q16204 CCDC6_HUMAN |
| 9390 | SQSAAVTPSSTTSSTR200000000000000000                | sp Q16186 ADRM1_HUMAN |
| 9391 | MNEEISSDSESESLAPR1000022000000000000              | sp 043818 U3IP2_HUMAN |
| 9392 | ITPPAAKPGSPQAK200000                              | sp P35658 NU214_HUMAN |
| 9393 | KRPESSDYDLSPAK20000020000                         | sp Q6W2J9 BCOR_HUMAN  |
| 9394 | KSPSDTEGLVK200000000                              | sp 095297 MPZL1_HUMAN |
| 9395 | SLQTGVGELHGETR200000000000000000                  | sp Q13393 PLD1_HUMAN  |
| 9396 | VSPSPTYR200000000                                 | sp P11274 BCR_HUMAN   |
| 9397 | NATLAWDSSHSSIQNSPK200002000                       | sp 015440 MRP5_HUMAN  |
| 9398 | SRSVSPCSNVESR2020000000000                        | sp Q9UQ35 SRRM2_HUMAN |
| 9399 | SKSPPKSPEEEGAVSS2000002000000000000               | sp Q01130 SRSF2_HUMAN |
| 9400 | NEENTEPGAESSENADDPNKDTSENADGQSDENKDDYTIPDEYR2E+33 | sp P43243 MATR3_HUMAN |
| 9401 | APLKPYVPS SDK200000                               | sp P41252 SYIC_HUMAN  |
| 9402 | TVDSQGPTPVCTPTFLER2000000000000                   | sp Q9BYG3 MK67I_HUMAN |
| 9403 | AAPSTAPAEATPPKPGAEAPPK2000000000000000            | sp 095817 BAG3_HUMAN  |
| 9404 | SPPASPESWK200000000000                            | sp Q96JM3 CHAP1_HUMAN |
| 9405 | KVPCSPDFQR2000000                                 | sp Q68DQ2 CRBG3_HUMAN |
| 9406 | EKEEPPSPIEATPPQSLLEK2000020000000000              | sp 075151 PHF2_HUMAN  |
| 9407 | FIQELSGSSPK2000                                   | sp Q01664 TFAP4_HUMAN |
| 9408 | SLDGAEF SRPASVSENHDAGPDGDK20002000000000000000    | sp Q9H4G0 E41L1_HUMAN |
| 9409 | QPATPTAAESSEGE GEGDDGGETESR2. 020002E+24          | sp Q96S55 WRIP1_HUMAN |
| 9410 | HQSESQGVLS DK2000                                 | sp P38398 BRCA1_HUMAN |
| 9411 | LQQQHSEQPPLQSPVMTR200000002000000                 | sp Q5JTV8 TOIP1_HUMAN |
| 9412 | YSPPAISPLVSEK2000020000000                        | sp Q14694 UBP10_HUMAN |
| 9413 | LGAVGSGGFK20000                                   | sp 095163 ELP1_HUMAN  |
| 9414 | IPLKPSPSK20000                                    | sp Q99755 PI51A_HUMAN |
| 9415 | SAPASPNHAGVLSAHSSGAQTPELSR2E+27                   | sp A2A3N6 PIPSL_HUMAN |
| 9416 | GQSQTSPDHRSDTSSPEVR202000000000200000             | sp Q01167 FOXK2_HUMAN |
| 9417 | YHGHSMSDPGVSYR200002000                           | sp Q9UQ35 SRRM2_HUMAN |
| 9418 | SPQPDPVK200000000                                 | sp P29803 ODPAT_HUMAN |
| 9419 | AGGDLSPGR20000                                    | sp P08559 ODPA_HUMAN  |
| 9420 | AKSPISSGSGSHMSGTSSSSGMK2E+22                      | sp P46013 KI67_HUMAN  |
| 9421 | RGNDPLTSSPGR2020000                               | sp Q9BUH8 BEGIN_HUMAN |
| 9422 | LSSLRASTKSSESSQK2000000002022000                  | sp Q15648 MED1_HUMAN  |
| 9423 | RRSPSPYYSR202000000                               | sp P49736 MCM2_HUMAN  |
| 9424 | ELPSQASGLANPPPVNLEDSLDEDLIR200000000              | sp P62753 RS6_HUMAN   |
| 9425 | KTSASDVTNIYPGDAGK2000000000000000000              | sp Q13595 TRA2A_HUMAN |
| 9426 | SPSAIPEQNHSLNDQAK2000000000000000000              | sp P62995 TRA2B_HUMAN |
| 9427 | TKPTQAAGPSSPQKPPTPEETK2000000000200               | sp Q9NPG3 UBN1_HUMAN  |
| 9428 | YQEDSDPERSDYEEQLQK3. 000000002E+19                | sp Q15042 RB3GP_HUMAN |
| 9429 | GSSWLQDGSAR2000                                   | sp Q13129 RLF_HUMAN   |
| 9430 | GPAETAAADSEPDTDPEER20000000020000000              | sp P18887 XRCC1_HUMAN |
| 9431 | RVSGDAAQDLDR200000000000                          | sp Q6P6C2 ALKB5_HUMAN |
| 9432 | LTQTSGQSTHTHKEPASGDEGIK200000000                  | sp 075676 KS6A4_HUMAN |
| 9433 | QEDSESESEESDSEEAASPAQVK2. 022000002E+21           | sp Q5XUX0 FBX31_HUMAN |
| 9434 | EDLTDLEQPGSPGYSTATEPGSSELGVPEQPDLQEGTHVEK2E+31    | sp Q9Y4H2 IRS2_HUMAN  |
| 9435 | KRESESESDETPPAAPQLIK200000000000                  | sp P46013 KI67_HUMAN  |
|      |                                                   | sp Q13428 TCOF_HUMAN  |
|      |                                                   | sp Q92538 GBF1_HUMAN  |
|      |                                                   | sp 060832 DKC1_HUMAN  |

|      |                                                |                       |
|------|------------------------------------------------|-----------------------|
| 9436 | YSPTSPTYSPPTPK300020030000000                  | sp P24928 RPB1_HUMAN  |
| 9437 | ESEESDDDMGFGLFD200200010000000                 | sp P05386 RLA1_HUMAN  |
|      |                                                | sp P05387 RLA2_HUMAN  |
| 9438 | SRGQGYVGGQR200000000000                        | sp Q1KMD3 HNRL2_HUMAN |
| 9439 | ISLPLPNFSSLNLR2000000000000                    | sp P08670 VIME_HUMAN  |
| 9440 | RHSHSHSPMSTR202010000                          | sp P62995 TRA2B_HUMAN |
| 9441 | TTPPPR20200000                                 | sp Q8IYB3 SRRM1_HUMAN |
| 9442 | SETAAPAAAPPAEK20000000000000                   | sp P16403 H12_HUMAN   |
| 9443 | TLSVAAAFNEDEDSEPEEMPPEAK200001000000           | sp Q8WW12 PCNP_HUMAN  |
| 9444 | FKAEAPLPSPK2000                                | sp Q09666 AHNK_HUMAN  |
| 9445 | RPAEATSSPTSPERPR2000000000                     | sp Q9BU76 MMTA2_HUMAN |
| 9446 | KAENAEGQTPAIGPDGEPLDETSQMSDLPVK2000000         | sp P51532 SMCA4_HUMAN |
| 9447 | NASVPNLR2000000                                | sp Q9H019 MFR1L_HUMAN |
| 9448 | SPSPYYSR200000000                              | sp P62995 TRA2B_HUMAN |
|      |                                                | sp Q13595 TRA2A_HUMAN |
| 9449 | WTSQHSNTQTLGK2000000                           | sp Q6PKG0 LARP1_HUMAN |
| 9450 | SDNSDIRPSGPPPTLPASPSNHVSSLPPFIAPPGR2.00002E+27 | sp Q8NEZ4 KMT2C_HUMAN |
| 9451 | ASTPDWVSEGPQPGLR2200000000000000               | sp Q8IVT2 MISP_HUMAN  |
| 9452 | SWDSSSPVDRPEPEEAAPTTR2220000000000200000       | sp Q86WB0 NIPA_HUMAN  |
| 9453 | SPQRSPLQSAESSPTAGK2000200020000000000          | sp Q8IWB9 TEX2_HUMAN  |
| 9454 | SPQPDPVDTASTK200000002000200                   | sp P46013 KI67_HUMAN  |
| 9455 | GLSNAGDPEIVK2000000000000                      | sp O43847 NRDC_HUMAN  |
| 9456 | SLSRPSSLIEQEK220000000                         | sp Q12802 AKP13_HUMAN |
| 9457 | TAHNSEADLEESFNEHELEPSSPK22000                  | sp Q8IWS0 PHF6_HUMAN  |
| 9458 | HSQSPPEPHSPTEPPAWGSSIVK2.0000002E+19           | sp Q5VZ89 DEN4C_HUMAN |
| 9459 | QQDLHLESPQRQPEYSPESPR200000030002000           | sp Q9H6F5 CCD86_HUMAN |
| 9460 | SSRSVEDDKGHLVCR2200000000000000                | sp P49761 CLK3_HUMAN  |
| 9461 | KAASPSQSVR202002000                            | sp Q8IYB3 SRRM1_HUMAN |
| 9462 | RASHTLLPSHR2000000000                          | sp Q9UKV3 ACINU_HUMAN |
| 9463 | TSCRLSGGLGAGSCR200020000000000                 | sp Q04695 K1C17_HUMAN |
| 9464 | LSPCVPAKPPLAEFEGLDR2E+20                       | sp Q15742 NAB2_HUMAN  |
| 9465 | SSPGQPEAGPEGAQERPSQAAPAVEAEGPGSSQAPR2E+19      | sp P40222 TXLNA_HUMAN |
| 9466 | SDGAPASDSKPGSSEAAPSSK200000000                 | sp P80723 BASP1_HUMAN |
| 9467 | VPPAPVCPSPSPGSAVPSSPK200002000                 | sp O95817 BAG3_HUMAN  |
| 9468 | SPDLEASLDLENNCHVGSIDFRPK2E+26                  | sp Q13111 CAF1A_HUMAN |
| 9469 | VESEESGDEEGKK200200000000                      | sp Q15435 PP1R7_HUMAN |
| 9470 | DRSPHRSSPSDTRPK2200000000                      | sp Q8IWS0 PHF6_HUMAN  |
| 9471 | RESKPEEPPPK2000000000                          | sp O00255 MEN1_HUMAN  |
| 9472 | GQEEISGALPVASSR2000000                         | sp Q9UBK8 MTRR_HUMAN  |
| 9473 | SRTASGSSVTSLDGTR202000000000                   | sp Q92597 NDRG1_HUMAN |
| 9474 | SDASSPTISPASSP200220000000000                  | sp Q9Y2Y9 KLF13_HUMAN |
| 9475 | SGEQITSPVSPK20000002002000                     | sp O43314 VIP2_HUMAN  |
| 9476 | TGQAGSLSGSPKPFSPQLSAPITTK2000020000000000      | sp Q9ULU4 PKCB1_HUMAN |
| 9477 | DFLSGPDYDHTVGSDEDEEVEGEP2.000000002E+24        | sp Q6ZW31 SYDE1_HUMAN |
| 9478 | NMVDLVNTHHLHSSDDEDDRLK1.00000000022E+22        | sp Q9UPN7 PP6R1_HUMAN |
| 9479 | DLPSPDSR200000                                 | sp Q9UGU0 TCF20_HUMAN |
| 9480 | SRSPVDLR202000000                              | sp Q13523 PRP4B_HUMAN |
| 9481 | SVSDPVEDK2000000000                            | sp Q8NFC6 BD1L1_HUMAN |
| 9482 | EQSEVSVSPR200000                               | sp Q7L4I2 RSRC2_HUMAN |
| 9483 | SEEEQSSSVK200000000000                         | sp P07910 HNRPC_HUMAN |
| 9484 | QQDLHLESPQRQPEYSPESPR20000002002000            | sp Q9H6F5 CCD86_HUMAN |
| 9485 | TPLSFTNPLHSDSDSDERNSDGAVTQNK2.0020200002E+19   | sp Q05209 PTN12_HUMAN |
| 9486 | NAVALSASPQLK200000                             | sp Q92547 TOPB1_HUMAN |
| 9487 | VISDESIDIGSDVEFKPDTK2000000000000000           | sp P52701 MSH6_HUMAN  |

|      |                                                    |                       |
|------|----------------------------------------------------|-----------------------|
| 9488 | MNEEISSDSESESLAPR100000202020000000                | sp 043818 U3IP2_HUMAN |
| 9489 | SASQSSLDKLDQELK20000000000                         | sp 060271 JIP4_HUMAN  |
| 9490 | TEDGGFEFEGASENNAKESPEK220000                       | sp 043719 HTSF1_HUMAN |
| 9491 | SAASPVVSSMPERASESSSEEKDDYEIFVK2.00000000000002E+30 | sp P18583 SON_HUMAN   |
| 9492 | VDINTPDVDVHGPDWHLK20000000000000                   | sp Q09666 AHNK_HUMAN  |
| 9493 | DTHPGSPGSPGALRPLPAR2002000000000000                | sp Q8N0Y2 ZN444_HUMAN |
| 9494 | STESVKSTVSETYLSKPSIAK2.020022E+20                  | sp Q7Z6B7 SRGP1_HUMAN |
| 9495 | SQRSNSPLPVPPSK2020202000000000                     | sp Q13247 SRSF6_HUMAN |
| 9496 | SLHSAHSLASR200200000200                            | sp 015027 SC16A_HUMAN |
| 9497 | INFSDLQQR2000000                                   | sp Q15154 PCM1_HUMAN  |
| 9498 | TAHNSEADLEESFNEHELEPSSPK2.0000002E+20              | sp Q8IWS0 PHF6_HUMAN  |
| 9499 | APSDSSLGTPSDGRPELR20000000000000                   | sp Q15642 CIP4_HUMAN  |
| 9500 | SCDELSPVSPTQGGYPSEPTR200000000000                  | sp Q9HCD6 TANC2_HUMAN |
| 9501 | SDASSPTISPASSP20200000000                          | sp Q9Y2Y9 KLF13_HUMAN |
| 9502 | SKSPPKSPEEGAVSS200000000000020                     | sp Q01130 SRSF2_HUMAN |
| 9503 | AKSLDGVTNDR2000000000                              | sp Q9UBM7 DHCR7_HUMAN |
| 9504 | LSPSPTTEDPR200000000                               | sp Q9BTC8 MTA3_HUMAN  |
| 9505 | TDHGAEIVYKSPVSGDTSR200000002000                    | sp P10636 TAU_HUMAN   |
| 9506 | FSPPPVGQK20000000000                               | sp TAU_HUMAN          |
| 9507 | QSGRESPLASR200000000000                            | sp Q9HCD6 TANC2_HUMAN |
| 9508 | APQTSSPPVVR200000000                               | sp Q8WWM7 ATX2L_HUMAN |
| 9509 | LGGLRPESPELTSVSR20000000200                        | sp Q8IYB3 SRRM1_HUMAN |
| 9510 | GLRDSHSSEDEASSQTDLSQTSK2.2000002E+19               | sp Q9H6F5 CCD86_HUMAN |
| 9511 | SQDATFSPGSEQAEKSPGPIVSR2.00000000002E+19           | sp Q5JTV8 TOIP1_HUMAN |
| 9512 | SPPEPPDFCCPK20000000000000                         | sp Q86WB0 NIPA_HUMAN  |
| 9513 | SRDSGDENEPIQER200000000000                         | sp Q9Y6K9 NEMO_HUMAN  |
| 9514 | RPDHSGGSPSPTSEPAR200202000000000                   | sp Q8WX93 PALLD_HUMAN |
| 9515 | LPSLGNKEPPGQEK20000000000000                       | sp Q8TAD8 SNIP1_HUMAN |
| 9516 | RPGFSPTSHR2000000                                  | sp Q9UPY5 XCT_HUMAN   |
| 9517 | QQAAYYAQTSPQGMPQHPPAPQGQ3E+19                      | sp Q8WUA4 TF3C2_HUMAN |
| 9518 | AQTPISSLPTSPSDEVGR20000200000000                   | sp Q96AE4 FUBP1_HUMAN |
| 9519 | SVSNGTAKPATSENFDEDLK200200000000000000             | sp Q15751 HERC1_HUMAN |
| 9520 | KLSDINQEEASGTSLHQK2000000000000000                 | sp Q96K49 TM87B_HUMAN |
| 9521 | SAFTPATATGSSPSPVLGQGEK2.002E+19                    | sp Q4L235 ACSF4_HUMAN |
| 9522 | VDHGAEIITQSPGRSSVASPR20200022000000                | sp Q15811 ITSN1_HUMAN |
| 9523 | AGGGPTLQCPPSSPEK200000                             | sp P11137 MTAP2_HUMAN |
| 9524 | SPSPSPTPEAK200000000000                            | sp Q96N66 MBOA7_HUMAN |
| 9525 | GEGDAPFSEPGTTSTQRPSPETATK20000000000000            | sp Q8TAQ2 SMRC2_HUMAN |
| 9526 | SELCSPLGK200000                                    | sp Q9UQ35 SRRM2_HUMAN |
| 9527 | VLSQSTPGTPSK200                                    | sp Q9Y2F5 ICE1_HUMAN  |
| 9528 | SSGHSSSELSPDAVEK2220000000000                      | sp Q6MZP7 LIN54_HUMAN |
| 9529 | KQSQIQNQQGEDSGDPEDTY2020000000                     | sp Q9UQ35 SRRM2_HUMAN |
| 9530 | SPQTLAPVGEDAMKTPSPAEDAR1020200000000               | sp P18858 DNLI1_HUMAN |
| 9531 | TKPTQAAGPSSPKPPTPEETK20000000000000                | sp Q92797 SYMPK_HUMAN |
| 9532 | NATQPPNAEEESGSSSASEEEDTKPKPTKR2.022202E+19         | sp P18887 XRCC1_HUMAN |
| 9533 | SRSFTLDDSLK2020000000000                           | sp Q68E01 INT3_HUMAN  |
| 9534 | DRSPPKSPEK200020000                                | sp Q86WR7 PRSR2_HUMAN |
| 9535 | DGPISPK2000                                        | sp Q9UQ35 SRRM2_HUMAN |
| 9536 | EGEETEGSEDDKENDKTEEMPNDVLENK2.0000000000002E+26    | sp Q8WWQ0 PHIP_HUMAN  |
| 9537 | SHSDNDRFK2020000000                                | sp P49321 NASP_HUMAN  |
| 9538 | TLLSSDDEF2200000                                   | sp 075494 SRS10_HUMAN |
| 9539 | RLSSTSLASGHSVR202000000000                         | sp Q9Y519 T184B_HUMAN |
| 9540 | RLSSASTGKPLSVEDDFEK200000000020000000              | sp Q9BZL6 KPCD2_HUMAN |
|      |                                                    | sp 075152 ZC11A_HUMAN |



|      |                                                       |    |        |             |
|------|-------------------------------------------------------|----|--------|-------------|
| 9541 | DTLSNPQSPQSPYNSPKPQHK2. 0000000203E+19                | sp | Q96PU5 | NED4L_HUMAN |
| 9542 | RRTSPPPR200000                                        | sp | Q8IYB3 | SRRM1_HUMAN |
| 9543 | SISGTPAETPACK2000000000                               | sp | Q9Y4D8 | HECD4_HUMAN |
| 9544 | SDSEESGSEEEEEEEEQPAAQPPTLPVEEK2. 00202E+31            | sp | P51532 | SMCA4_HUMAN |
| 9545 | RQSPSPSTRPIR20200000000                               | sp | Q8IYB3 | SRRM1_HUMAN |
| 9546 | KTPSKPPAQLSPSVPK2000000002000000                      | sp | P18887 | XRCC1_HUMAN |
| 9547 | NSVLSDPGLDSPRTSPVIMAR200200000000                     | sp | O15085 | ARHGB_HUMAN |
| 9548 | DQPPFGSDDSVEADKSSPGIHLER2002000000200000000           | sp | Q14676 | MDC1_HUMAN  |
| 9549 | RPACDPEPGESGSSSDEGCTVVRPEKK202200000000000000         | sp | O15541 | R113A_HUMAN |
| 9550 | HGSILNR200000                                         | sp | Q9NZN5 | ARHGC_HUMAN |
| 9551 | QRSHSGTSPDNTAPPPPPRPPQPSHSR2. 02E+25                  | sp | Q96D71 | REPS1_HUMAN |
| 9552 | YPRPASVPPSPSLSR20002000200                            | sp | P13807 | GYS1_HUMAN  |
| 9553 | TPPVALNSSR20000002000                                 | sp | Q9UQ35 | SRRM2_HUMAN |
| 9554 | QRGSETGSETHESDLAPSDK200000000000                      | sp | P48634 | PRC2A_HUMAN |
| 9555 | EWYQSTIPQSPSPAPDDPEEGR200000000000                    | sp | Q08499 | PDE4D_HUMAN |
| 9556 | SATRPSPSPER200002020000                               | sp | Q9UQ35 | SRRM2_HUMAN |
| 9557 | SLESSVIMDR22001000                                    | sp | Q9H2Y7 | ZN106_HUMAN |
| 9558 | GSLGISQEEQ200000                                      | sp | Q9NZD8 | SPG21_HUMAN |
| 9559 | SVSPESNDISEELNHFKPIVCSPTPK2. 02002E+29                | sp | Q8NCN4 | RN169_HUMAN |
| 9560 | LLLERPSPIR20000                                       | sp | Q96T37 | RBM15_HUMAN |
| 9561 | RPAEATSSPTSPERPR20000000                              | sp | Q9BU76 | MTA2_HUMAN  |
| 9562 | GSSGSPAHAESYSSGGGGQK2. 002E+20                        | sp | P15408 | FOSL2_HUMAN |
| 9563 | EGEETEGSEEDDKENDKTEEMPNDVLENK2. 0000000002001E+23     | sp | P49321 | NASP_HUMAN  |
| 9564 | QEKPAEKPAETPVATSPTATDSTSGDSSR2000000                  | sp | P54727 | RD23B_HUMAN |
| 9565 | LSVPTSDEEDEVPAKPR2000000000000000                     | sp | Q8NE71 | ABCF1_HUMAN |
| 9566 | SLSSDSTLLLFK20020000000                               | sp | Q9HAW4 | CLSPN_HUMAN |
| 9567 | SVVSFDKVK2002000000                                   | sp | Q15424 | SAFB1_HUMAN |
| 9568 | RPAGGRPSPSAMGK20001000                                | sp | Q92615 | LAR4B_HUMAN |
| 9569 | SASPEVSEGHENQHGESEAK2E+19                             | sp | O60930 | RNH1_HUMAN  |
| 9570 | GSSDGRGSDSEDLPHR2000000000000000                      | sp | Q9UPQ0 | LIMC1_HUMAN |
| 9571 | MNEEISSDSESESLAPR100002000020000000                   | sp | O43818 | U3IP2_HUMAN |
| 9572 | RPSVDAPVTDVGFRLR20000000000000                        | sp | Q9BUH8 | BEGIN_HUMAN |
| 9573 | TDKSSASAPDVEDPEAFPALA2E+21                            | sp | Q8NC51 | PAIRB_HUMAN |
| 9574 | EGNTTEDDFSSPGNGNK200000000                            | sp | Q15007 | FL2D_HUMAN  |
| 9575 | YLPLNTALYEPPLDPELPALDSDGSDGDEGRGDEK200020000000000000 | sp | Q8WUB8 | PHF10_HUMAN |
| 9576 | KHSDPHLLER200000000                                   | sp | Q9Y6M7 | S4A7_HUMAN  |
| 9577 | RPAEATSSPTSPERPR20022000000                           | sp | Q9BU76 | MTA2_HUMAN  |
| 9578 | DVSGFSDPYCLLGIEQGVGVPGGSPGSR200                       | sp | Q70J99 | UN13D_HUMAN |
| 9579 | SASEPSLHR2000000000                                   | sp | P10398 | ARAF_HUMAN  |
|      |                                                       | sp | P04049 | RAF1_HUMAN  |
| 9580 | IESDTEETQDTSVDHNETGNTGESSVEENEK2E+27                  | sp | Q6PL18 | ATAD2_HUMAN |
| 9581 | LQQAALSPTTAPAVSSVSK200000000000                       | sp | Q8WXI9 | P66B_HUMAN  |
| 9582 | GPSQATSPIR200000                                      | sp | Q7RTP6 | MICA3_HUMAN |
| 9583 | SATSTSASPTLR2000000002000                             | sp | O75061 | AUXI_HUMAN  |
| 9584 | SVSHGSNHTQKPDEQR202000000000000000                    | sp | Q9Y520 | PRC2C_HUMAN |
| 9585 | DMESPTKLDVTLAK2000000000                              | sp | P27816 | MAP4_HUMAN  |
| 9586 | HVSTSSDEGSPSASTPMINK200000000000                      | sp | Q7L1W4 | LRC8D_HUMAN |
| 9587 | QNSPVTQDGIQESPWQDR20000000000000                      | sp | O75815 | BCAR3_HUMAN |
| 9588 | GKLSAENPDDSEVPSSGINSTK20000000000000                  | sp | Q9Y5Q9 | TF3C3_HUMAN |
| 9589 | AKSPTSPSPPRNSDQEGGK2. 00020200002E+19                 | sp | Q8IYB3 | SRRM1_HUMAN |
| 9590 | YGLQDSDEEEEHPSK300000000000000000                     | sp | P52948 | NUP98_HUMAN |
| 9591 | QSPGHQSPLASPK2000020000000                            | sp | Q8N1G0 | ZN687_HUMAN |
| 9592 | DEVFHTDQDDPSSDDEGMPYTRPVK220000100000000              | sp | Q5JSH3 | WDR44_HUMAN |

|      |                                                           |                       |
|------|-----------------------------------------------------------|-----------------------|
| 9593 | GSGSEQEGEDEEGGER2020000000000000                          | sp Q6PD62 CTR9_HUMAN  |
| 9594 | TAPDTKPSPR2000                                            | sp P22105 TENX_HUMAN  |
| 9595 | DSPDSPEPPNKKPLVEMDETPQVEK2E+21                            | sp Q9NVM9 ASUN_HUMAN  |
| 9596 | ENPPVEDSSDEDDKRNQGNLYDK2200000000000000                   | sp Q8TCJ2 STT3B_HUMAN |
| 9597 | TGPLSTSSPSR20000                                          | sp Q8IY92 SLX4_HUMAN  |
| 9598 | ARSVSPPPKR200000000                                       | sp Q13247 SRSF6_HUMAN |
| 9599 | GTEPSPGGTPQPSRPVSPAGPPEGVPEEAQPPR2.00200000002E+32        | sp Q8WUZ0 BCL7C_HUMAN |
| 9600 | NSSSPVSPASVPGQR22000000000000                             | sp Q9H1B7 I2BPL_HUMAN |
| 9601 | VQRPHSSPPR200000                                          | sp Q9NUJ3 T11L1_HUMAN |
| 9602 | AGAVTSTPNRNSSK2000                                        | sp Q9ULR3 PPM1H_HUMAN |
| 9603 | RVPSINQK200000                                            | sp Q92834 RPGR_HUMAN  |
| 9604 | YLCNSPQKPNDR200000000                                     | sp O14975 S27A2_HUMAN |
| 9605 | HVLQTAVADSPR2000                                          | sp Q7Z2Z1 TICRR_HUMAN |
| 9606 | GDAASSPAPAASVGSQGGAR20000000002000000                     | sp Q8WVB6 CTF18_HUMAN |
| 9607 | EEDCHSPTS KPPKPDQLK200000000000                           | sp P23588 IF4B_HUMAN  |
| 9608 | EALNIIGDISTSTVSTVPPVDDTWLQSASSHSPTQR2000000000000000<br>0 | sp P50570 DYN2_HUMAN  |
| 9609 | RTSFSFQK2000000                                           | sp Q9BPZ7 SIN1_HUMAN  |
| 9610 | TIETSPSLSR2000000                                         | sp Q9NVI1 FANCI_HUMAN |
| 9611 | RHSSETFSSTTTVTPVSPFAHNPK202002000000000                   | sp Q9Y4H2 IRS2_HUMAN  |
| 9612 | QSPGHQSPLASPK2000020002000                                | sp Q8N1G0 ZN687_HUMAN |
| 9613 | SPMSTNSSVHTGSDVEQDAEKK2.000000000002E+22                  | sp Q9ULU4 PKCB1_HUMAN |
| 9614 | APPPISPTQLSDVSSPR20020002000                              | sp Q9P0K7 RAI14_HUMAN |
| 9615 | LAAAASPHSGGR20020000                                      | sp O95613 PCNT_HUMAN  |
| 9616 | TSPTPEASATNSPCTSKPATPAPSEK2.0002E+23                      | sp Q12873 CHD3_HUMAN  |
| 9617 | ALSSDSILSPAPDAR20020000000                                | sp Q8IVT2 MISP_HUMAN  |
| 9618 | LLEDGEDFNLGDALDSSNSMQTIQK21000000                         | sp P05783 K1C18_HUMAN |
| 9619 | KPSAPSPPDQTPEEDLVIVK2000000000000000                      | sp Q15776 ZKSC8_HUMAN |
| 9620 | AGEPNSPDAEANS PDVTAGCDPAGVHPPR20000000000000              | sp Q08J23 NSUN2_HUMAN |
| 9621 | LLRPNSLR2000                                              | sp Q8WXG6 MADD_HUMAN  |
| 9622 | AGGSPAPGPETPAISPSK2000000000000000                        | sp P33316 DUT_HUMAN   |
| 9623 | KPSDSLVA SSSR200000002200                                 | sp Q5T0W9 FA83B_HUMAN |
| 9624 | YSPTSPTYSPSPK220030000000                                 | sp P24928 RPB1_HUMAN  |
| 9625 | KLPGSDSENEELLNGHASDSENEVDVGK2.020000000002E+23            | sp Q96ST2 IWS1_HUMAN  |
| 9626 | SLSSPGGPSKPK20000000000                                   | sp Q9BZE9 ASPC1_HUMAN |
| 9627 | RYSGSDSSASSAQSGPLGTR2000000000000000                      | sp Q99501 GA2L1_HUMAN |
| 9628 | TRSPSPTLGESLAPHK20000020000000000                         | sp Q86UU1 PHLB1_HUMAN |
| 9629 | DSSSLSSCTSGILEER22000000000                               | sp Q9H3Q1 BORG4_HUMAN |
| 9630 | LFDEEEDSSEK22000                                          | sp O43719 HTSF1_HUMAN |
| 9631 | SGSALLQSSTEDPK2200000                                     | sp Q5VTR2 BRE1A_HUMAN |
| 9632 | LPSLGNK200000                                             | sp Q9UPY5 XCT_HUMAN   |
| 9633 | SPQPPVEEEDHFDDTVVCLDTYNCDLHFK2000000000000000             | sp Q00839 HNRPU_HUMAN |
| 9634 | EPGSGTESDTPDFHNQENEPSQEDPEDLDGSVQGVKPKK2.0202E+37         | sp Q9HAF1 EAF6_HUMAN  |
| 9635 | SRPTSEGS DIESTEPQK200020000000000                         | sp Q4G0J3 LARP7_HUMAN |
| 9636 | APSASDSKADSDGAKPEPVAMAR2.0200020002E+23                   | sp Q7Z4V5 HDGR2_HUMAN |
| 9637 | AQQCVSPSSSLCR200000000                                    | sp Q8TCN5 ZN507_HUMAN |
| 9638 | SSWHQSSFHSTR200002000000                                  | sp Q99959 PKP2_HUMAN  |
| 9639 | SESGSPSAGGHSKPPHSPLVLK2.0000000000002E+20                 | sp P01106 MYC_HUMAN   |
| 9640 | TVTPASSAKTSPAK2200000000                                  | sp Q16555 DPYL2_HUMAN |
| 9641 | RSSQPSPTAVPASDSPPTK2200000000000000000                    | sp Q3KQU3 MA7D1_HUMAN |
| 9642 | EGAASPAPETPQPTSPETSPK20000000                             | sp Q9Y3X0 CCDC9_HUMAN |
| 9643 | KEESP PPK2000000                                          | sp P78332 RBM6_HUMAN  |
| 9644 | SLNSVVTSEPDKHSLLVGDFR2.0000002000002E+21                  | sp Q04656 ATP7A_HUMAN |
| 9645 | EVEEDSEDEEMSEDEEDDSSGEEVVIPQKK2.0000120000002E+25         | sp P19338 NUCL_HUMAN  |

|      |                                                  |    |        |             |
|------|--------------------------------------------------|----|--------|-------------|
| 9646 | LRAESPSPPR2020000                                | sp | P50219 | MXN1_HUMAN  |
| 9647 | TLSVAAAFNEDEDSEPEEMPPEAK2E+22                    | sp | Q8WW12 | PCNP_HUMAN  |
| 9648 | HSSETFSSTTTVTPVSPSFAHNPK202000000000000          | sp | Q9Y4H2 | IRS2_HUMAN  |
| 9649 | STPFIVPSSPTEQEGR2000000200000000                 | sp | Q12888 | TP53B_HUMAN |
| 9650 | SPQVKPASTMGMGPLGK20000000101000000               | sp | Q13428 | TCOF_HUMAN  |
| 9651 | VLTPPQAAGDGLATTANQR200000000000000000            | sp | Q96QT6 | PHF12_HUMAN |
| 9652 | NPEPDSDEHTPVEDEEPPK2000200000000000              | sp | Q8N5F7 | NKAP_HUMAN  |
| 9653 | LPASPSGSEDLSSVSSPTSSPK220000000                  | sp | Q9P2N6 | KANL3_HUMAN |
| 9654 | YSPTSPTYSPK2000                                  | sp | P24928 | RPB1_HUMAN  |
| 9655 | IPSAVSTVSMQNIHPK20210000000                      | sp | P19634 | SL9A1_HUMAN |
| 9656 | NSTGSGHSAQELPTIR2000000000000                    | sp | O94763 | RMP_HUMAN   |
| 9657 | RPGSVSSTDQER200000                               | sp | Q9H1B7 | I2BPL_HUMAN |
| 9658 | GELSRSPSPFTHTHLAQGYR2020020000000000             | sp | P38398 | BRCA1_HUMAN |
| 9659 | GRASSHSSQTQGGGSVTK2000000000000200               | sp | P02545 | LMNA_HUMAN  |
| 9660 | SIDTQTPGGADR2000000000000                        | sp | Q6P1L5 | F117B_HUMAN |
| 9661 | VKASPI TNDGEDEFVPSDGLDKDEYTFSPGK2E+28            | sp | Q02880 | TOP2B_HUMAN |
| 9662 | GSGDISSDSIDHSPAK200200020000                     | sp | Q9H5I1 | SUV92_HUMAN |
| 9663 | KSSPSVKPAVDPAAAK2000000000000000                 | sp | Q6FI81 | CPIN1_HUMAN |
| 9664 | ARSTPSPVLQPR2020000000                           | sp | Q8TEK3 | DOT1L_HUMAN |
| 9665 | RPSPQSPR2000                                     | sp | Q9UQ35 | SRRM2_HUMAN |
| 9666 | ASPATQPPPLLPPSATGPDATVGGPAPTLLPPSATASVK2E+39     | sp | Q07666 | KHDR1_HUMAN |
| 9667 | TGVPSTASVGK20020000                              | sp | P28290 | SSFA2_HUMAN |
| 9668 | RNSSSPVSPASVPGQR2220000000000000                 | sp | Q9H1B7 | I2BPL_HUMAN |
| 9669 | TGSVQTPDLESSEEVDAEAGAPEVVGPK2. 000020000002E+29  | sp | P28290 | SSFA2_HUMAN |
| 9670 | SRTSVQTEDDQLIAGQSAR220020000000000000            | sp | P35221 | CTNA1_HUMAN |
| 9671 | STPHRTPIITPNTK220000000200000                    | sp | P26232 | CTNA2_HUMAN |
| 9672 | YRNEGSPSPR202000                                 | sp | Q9NQW6 | ANLN_HUMAN  |
| 9673 | TEPAAEAEASGPSESPSPAEEELPGSHAEPVPAQGEAPGEQAR2E+19 | sp | Q5T200 | ZC3HD_HUMAN |
| 9674 | TEDGGWEWSDEFDEESEEGK2E+21                        | sp | P55884 | EIF3B_HUMAN |
| 9675 | VSPSPQESLSSSK202002000000                        | sp | O95747 | OXSR1_HUMAN |
| 9676 | SVSPYSR20200000                                  | sp | Q5JSH3 | WDR44_HUMAN |
| 9677 | GSPATSPHLGR22000000                              | sp | Q9NYV4 | CDK12_HUMAN |
| 9678 | RPILQLSPPGPR2000000                              | sp | Q13671 | RIN1_HUMAN  |
| 9679 | GPSPPGAK2000000                                  | sp | Q8N3X1 | FNBP4_HUMAN |
| 9680 | SILVSPTGPSR200020000000                          | sp | Q96S55 | WRIP1_HUMAN |
| 9681 | TLENSPISSCDTSDTEGPVNVNSAAVLK2. 2E+21             | sp | Q14684 | RRP1B_HUMAN |
| 9682 | YIEIDSDEEPRGELLSLR2000000000000000               | sp | Q8N556 | AFAP1_HUMAN |
| 9683 | DRPPCSPSR20000                                   | sp | Q9NVU7 | SDA1_HUMAN  |
| 9684 | GGNLPPVSPNDGAK200020000                          | sp | O95758 | PTBP3_HUMAN |
| 9685 | ILENSEDSSPECLF22000000                           | sp | Q9UK61 | F208A_HUMAN |
| 9686 | SETSSNPSSPEICPNK2002200000000                    | sp | Q9NRZ9 | HELLS_HUMAN |
| 9687 | SRDESASETSTPSEHSAAPSPQVEVR2. 0002020222E+26      | sp | Q684P5 | RPGP2_HUMAN |
| 9688 | SSSSLLASPGHISVK2200000000000000                  | sp | Q92614 | MY18A_HUMAN |
| 9689 | NTPSQHSHSIQHSPER2000020000020000                 | sp | A0FGR8 | ESYT2_HUMAN |
| 9690 | DGSGTPSRHSLSGSSPGMK20202000000                   | sp | Q9NYF8 | BCLF1_HUMAN |
| 9691 | SPPPRSPSPPTHR2000000002000000                    | sp | Q9UQ35 | SRRM2_HUMAN |
| 9692 | LQVYEGGGQPPQDLPGSPK2000                          | sp | Q96HA1 | P121A_HUMAN |
| 9693 | DSPGIPPSANAHQLFR2000000000000000                 | sp | Q86Y91 | KI18B_HUMAN |
| 9694 | DAPTSPASVASSSTPSSK20000000000000200              | sp | P51812 | KS6A3_HUMAN |
| 9695 | QQSLPPP2000000                                   | sp | Q04726 | TLE3_HUMAN  |
| 9696 | GHTASESDEQQWPEEK2000000000000000                 | sp | Q9UPQ0 | LIMC1_HUMAN |
| 9697 | TEVSPVPR200000                                   | sp | Q9NTI5 | PDS5B_HUMAN |
| 9698 | RDSSSHEETPGSHPLYGHGECK20000000000000000          | sp | O43159 | RRP8_HUMAN  |
|      |                                                  | sp | Q8IVH2 | FOXP4_HUMAN |

|      |                                                   |                       |
|------|---------------------------------------------------|-----------------------|
| 9699 | YGPADVEDTTGSGATDSKDDDDIDLFGSDDEEESEEAK2E+30       | sp P24534 EF1B_HUMAN  |
| 9700 | SPMSTNSSVHTGSDVEQDAEKK2. 010000000002E+22         | sp Q9ULU4 PKCB1_HUMAN |
| 9701 | NQGGYGGSSSSSYGSGR2000000000                       | sp P09651 ROA1_HUMAN  |
| 9702 | KEDKPEGQSPVK20000                                 | sp Q9C0C9 UBE20_HUMAN |
| 9703 | FSLCSDNLEGISEGPSNR20000000000000                  | sp Q14C86 GAPD1_HUMAN |
| 9704 | LNTSDFQK2000000                                   | sp Q96B36 AKTS1_HUMAN |
| 9705 | IPIPETPPQTPPVLDSPHQ20002000000200000              | sp Q969H4 CNKR1_HUMAN |
| 9706 | VHSPASLVPR2000000000                              | sp Q9BTE3 MCMBP_HUMAN |
| 9707 | ASPVTSPAAAFPTASPANK200000                         | sp Q9UIF9 BAZ2A_HUMAN |
| 9708 | SCFESSPDELK220000000                              | sp Q9UQ35 SRRM2_HUMAN |
| 9709 | EGTLTQVPLAPPPGAPPSPAPAR2000000                    | sp P48634 PRC2A_HUMAN |
| 9710 | EYIPGQPPLSQSSDSSPTR200020000                      | sp P07814 SYEP_HUMAN  |
| 9711 | NSTELAPPLPVR2000000000000                         | sp Q9H7D0 DOCK5_HUMAN |
| 9712 | SPPSYSVLYPSSDPK2000000000000000                   | sp Q8N3V7 SYNPO_HUMAN |
| 9713 | EVIEIEDASPTKCPITTK20000000000                     | sp P46100 ATRX_HUMAN  |
| 9714 | RSPERPTGDLR200000                                 | sp Q5T200 ZC3HD_HUMAN |
| 9715 | LRSPSNDSAHR2020000000                             | sp Q5T200 ZC3HD_HUMAN |
| 9716 | EPAPLLSAQYETLSDSD20000000                         | sp 075376 NCOR1_HUMAN |
| 9717 | AASDPLSSVSPAVSK200000002000000                    | sp P19532 TFE3_HUMAN  |
| 9718 | ISICSSDKR20000                                    | sp Q13547 HDAC1_HUMAN |
| 9719 | RPHGSTLSVSASPEK20000                              | sp Q92738 US6NL_HUMAN |
| 9720 | EEASLLSHSPGTSNQSQPCSPKPIR2E+22                    | sp Q9H4Z3 PCIF1_HUMAN |
| 9721 | STPEDHRNSSTETDQPHSPDSSSSVHSIR20000020000000000000 | sp Q92613 JADE3_HUMAN |
| 9722 | ADVQLFMDDSYSHHSGLEYADPEK1. 000030002E+19          | sp P51636 CAV2_HUMAN  |
| 9723 | SEVEGFSLPSR20000                                  | sp Q08AD1 CAMP2_HUMAN |
| 9724 | ADGAPSAAPPDGLLASPDGLLK200000000                   | sp P17535 JUND_HUMAN  |
| 9725 | SSSLKSAQGTGFELGQLQSIR2. 0000002E+19               | sp Q9C0B5 ZDHC5_HUMAN |
| 9726 | SSPVNNHSPGQTPTLGQPEAR2. 00000020002E+21           | sp Q5SW79 CE170_HUMAN |
| 9727 | AGLGSPPERPKTSPGSPR200000002002000                 | sp Q96L14 C170L_HUMAN |
| 9728 | STPACSPILR200000                                  | sp Q9H6F5 CCD86_HUMAN |
|      |                                                   | sp Q3KR37 GRM1B_HUMAN |
|      |                                                   | sp P49792 RBP2_HUMAN  |
|      |                                                   | sp Q7Z3J3 RGPD4_HUMAN |
| 9729 | EDALDSSVSSSSVHASPLASSPVRK2. 00000000000002E+19    | sp 014715 RGPD8_HUMAN |
|      |                                                   | sp Q99666 RGPD5_HUMAN |
|      |                                                   | sp A6NKT7 RGPD3_HUMAN |
| 9730 | SVVSFDK20000                                      | sp Q15424 SAFB1_HUMAN |
| 9731 | QQLPQTPPSCLK20000000                              | sp Q8IY81 SPB1_HUMAN  |
| 9732 | SNVSSPATPTASSSSSTPTR2000000000000000              | sp Q12888 TP53B_HUMAN |
| 9733 | NHSPSPVPTPTGAAPSLASPK200020000000000000           | sp Q5SYE7 NHSL1_HUMAN |
| 9734 | GTGSGGQLQDLDCSSDDEGAAQNSTKPSATK2E+31              | sp P08240 SRPR_HUMAN  |
| 9735 | SSPASSPELPWRPR2200020000000000                    | sp Q9NYF3 FA53C_HUMAN |
| 9736 | TRDDGDEEGLLTHSEEELEHSQDTDADDGALQ2. 0000002002E+19 | sp Q9UKM9 RALY_HUMAN  |
| 9737 | ILDELKDDSTHESLSQESESEEDGIHVDSQK2. 00202E+22       | sp Q9H6T3 RPAP3_HUMAN |
| 9738 | SDSSQPMLLR20000000                                | sp P11532 DMD_HUMAN   |
| 9739 | VVSSEGRPSVDLSFQPSQPLSK2E+20                       | sp P49815 TSC2_HUMAN  |
| 9740 | SSGTNFQGLPSK2000000000                            | sp Q68EM7 RHG17_HUMAN |
| 9741 | SRTSPAPWK2002000000                               | sp Q9UQ35 SRRM2_HUMAN |
| 9742 | ALEAASLSQHPPSLCISDSEEEEEER2. 0000000000202E+21    | sp 043159 RRP8_HUMAN  |
| 9743 | AGGPATPLSPTR20020000                              | sp Q03252 LMNB2_HUMAN |
| 9744 | EDILENEDEQNSPPK20000                              | sp Q9NTI5 PDS5B_HUMAN |
| 9745 | AGEAPTENPAPPTQSSAE2000                            | sp P16989 YBOX3_HUMAN |
| 9746 | SGSALLQSQSTEDPKDEPAELKPDSEDLSSQSSASK2. 02E+30     | sp Q5VTR2 BRE1A_HUMAN |
| 9747 | VAHEPVAPPEDKESESEAK20000                          | sp 095674 CDS2_HUMAN  |

|      |                                                    |                       |
|------|----------------------------------------------------|-----------------------|
| 9748 | RGNDPLTSSPGR20000                                  | sp P49736 MCM2_HUMAN  |
| 9749 | RQSPEPSPVTLGR200000000000                          | sp Q9NRL2 BAZ1A_HUMAN |
| 9750 | KLPPPGSPLGHSPTASPPPTAR20000002000000000            | sp O95785 WIZ_HUMAN   |
| 9751 | SPSPPLPTHIPPEPRTPPFPAK2.00002000000002E+21         | sp Q8IZ21 PHAR4_HUMAN |
| 9752 | SPPVQHPHTVITISLGTAPSLQNNQPVEFNHAINVYVK2E+37        | sp Q96ST3 SIN3A_HUMAN |
| 9753 | SQSRNSPLPVPPSK20202000000000                       | sp Q13247 SRSF6_HUMAN |
| 9754 | SASPYPSHLSPPQR20300000020000                       | sp Q5T200 ZC3HD_HUMAN |
| 9755 | RPSASSPNNNTAAK2002000000000                        | sp O75151 PHF2_HUMAN  |
| 9756 | EVAENQQNQSSDPEEEKGSQPPAAESQSSLR2E+22               | sp O43491 E41L2_HUMAN |
| 9757 | SQSKSPTGTPAR2020200020000                          | sp Q13595 TRA2A_HUMAN |
| 9758 | GTEPSPGGTPQPSRPVSPAGPPEGVPEEAQPPR2.00000000002E+32 | sp Q8WUZO BCL7C_HUMAN |
| 9759 | TPSSSSTLAYSPPR20000000000000                       | sp Q6Q0C0 TRAF7_HUMAN |
| 9760 | EFSGPSTPTGTLEFEGGEVSLEGGK2E+20                     | sp Q09666 AHNK_HUMAN  |
| 9761 | SISSPNVNR20000000                                  | sp Q9NQT8 KI13B_HUMAN |
| 9762 | QLSSTSPLAPYPTSQMVSSDR20000000000000000             | sp Q6UUV7 CRTC3_HUMAN |
| 9763 | HPSGGSSPPPR2002000000                              | sp Q6IQ23 PKHA7_HUMAN |
| 9764 | VSPLEGESEGDGDTD20000200000200                      | sp Q9Y606 TRUA_HUMAN  |
| 9765 | HQEVQDQDPVFGSDSSGYQSDHK20000                       | sp Q3B726 RPA43_HUMAN |
| 9766 | FSPVLGR2000000                                     | sp Q9NRG9 AAAS_HUMAN  |
| 9767 | TQSLPVTEK20000000                                  | sp Q9NQW6 ANLN_HUMAN  |
| 9768 | QLSALSSDGEQGGRPVPR20002000000000000                | sp O15438 MRP3_HUMAN  |
| 9769 | DGLAPEKTSPDRDK2000000                              | sp Q7L4I2 RSRC2_HUMAN |
| 9770 | VLANSNPSSPSAAK20000002000000                       | sp Q9NV56 MRGBP_HUMAN |
| 9771 | RGTGGSESSRASGLVGR2000022002000000                  | sp Q9UH99 SUN2_HUMAN  |
| 9772 | STSYGYSR2000000                                    | sp Q13242 SRSF9_HUMAN |
| 9773 | KKTVSFSSMPTEK200020100000                          | sp Q9UPR0 PLCL2_HUMAN |
| 9774 | SLSRTPSPPPFR2020202000000                          | sp Q7L4I2 RSRC2_HUMAN |
| 9775 | AISAPTSPTR200000200                                | sp Q9NQG6 MID51_HUMAN |
| 9776 | TPTPSTPGDTQPNTAPVPPAEDGIK2.000000002E+22           | sp Q14839 CHD4_HUMAN  |
| 9777 | MSGFIYQ GK1200000000                               | sp Q14155 ARHG7_HUMAN |
| 9778 | SCSSPAVSAVSQLPLSPK2000                             | sp Q15052 ARHG6_HUMAN |
| 9779 | NSASATPLSGNSSR2002000                              | sp Q9Y2F5 ICE1_HUMAN  |
| 9780 | ETSVSKEDTDHEEK2000002000000                        | sp Q9Y608 LRRF2_HUMAN |
| 9781 | GSPRPQAPK200000000                                 | sp O75475 PSIP1_HUMAN |
| 9782 | SPQQTVPYVVPLSPK2000                                | sp Q14978 NOLC1_HUMAN |
| 9783 | GPEVTSQGVQTSSPACK200000                            | sp Q9UQR0 SCML2_HUMAN |
| 9784 | SAEALGPGALVSPR200000000002000                      | sp Q99700 ATX2_HUMAN  |
| 9785 | SRSPPVSKR20200000000                               | sp Q9P227 RHG23_HUMAN |
| 9786 | MAESPCSPSQPPSPSPDEL PANVK2.0000000002E+21          | sp Q01130 SRSF2_HUMAN |
| 9787 | TSSKESPIPSPTSDR200220000000000                     | sp Q14160 SCRIB_HUMAN |
| 9788 | SSTPPRQSPSR2000020000                              | sp Q01082 SPTB2_HUMAN |
| 9789 | HPAGPPGEAQEGSAK2000                                | sp Q9UQ35 SRRM2_HUMAN |
| 9790 | EALNIIGDISTSTVSTVPPVDDTWLQSASSHSPTQR200000000      | sp Q6P1M3 L2GL2_HUMAN |
| 9791 | GRLSVASTPISR20020000000                            | sp P50570 DYN2_HUMAN  |
| 9792 | SVPGTTSSPLVGDISP K20000000002000                   | sp Q9BXS6 NUSAP_HUMAN |
| 9793 | SPACSSLTPSLCK20000000020000                        | sp Q9UQR0 SCML2_HUMAN |
| 9794 | SPTPNQDGD TMVEK200000000000000                     | sp Q96R06 SPAG5_HUMAN |
| 9795 | DGDSYDPYDFSDTEEMPQVHTPK2.0003000000001E+21         | sp Q3KR37 GRM1B_HUMAN |
| 9796 | SSIAGSEDAEPLAPPIKPIKPVTR2E+19                      | sp P25205 MCM3_HUMAN  |
| 9797 | AQSLVISPPAPSPR2000000002000                        | sp Q03164 KMT2A_HUMAN |
| 9798 | MAGNEALSPTSPFR220000                               | sp P46013 KI67_HUMAN  |
| 9799 | TEMKSPFNPSPPQDSPR20002000000000                    | sp Q86WR7 PRSR2_HUMAN |
| 9800 | RNSNSPPSPSSMNQR20000002000000                      | sp P08651 NFIC_HUMAN  |
|      |                                                    | sp Q7Z5L9 I2BP2_HUMAN |

|      |                                                   |                       |
|------|---------------------------------------------------|-----------------------|
| 9801 | SRSPIIHSPK20200002000                             | sp 094913 PCF11_HUMAN |
| 9802 | SPGSGSQSSGWHEVEPGMPSPTTLK200000000002000000       | sp Q12857 NFIA_HUMAN  |
| 9803 | EQAPDISPK2000                                     | sp Q7Z333 SETX_HUMAN  |
| 9804 | SLSFSEPQQPAPAMK20000000000000                     | sp Q9H8N7 ZN395_HUMAN |
| 9805 | SSSMSSLTGAYTSGIPSSSR200000000000000000            | sp A8CG34 P121C_HUMAN |
| 9806 | SRTPPTSR202000000                                 | sp Q9UQ35 SRRM2_HUMAN |
| 9807 | KDSSDRENPPHDSR22000000000000                      | sp Q92613 JADE3_HUMAN |
| 9808 | SSEYPISQNPGLSADK200000000000000000                | sp P38398 BRCA1_HUMAN |
| 9809 | SPPSSSEIFTPAHEENVR20000000000000000000            | sp C9JLW8 F195B_HUMAN |
| 9810 | SLDSEDEDEEDDYQQR20020000000000000000              | sp Q13442 HAP28_HUMAN |
| 9811 | LNSSVLPYGAESSEDSDEESK3000020020000000             | sp Q9H9J4 UBP42_HUMAN |
| 9812 | RPAEATSSPTSPERPR202000000000                      | sp Q9BU76 MMTA2_HUMAN |
| 9813 | SRSDIDVNAASAK2000000000000000                     | sp Q7Z460 CLAP1_HUMAN |
| 9814 | SEEVPAFGVASPPPLTDTPTDTANAEGDLPTTMGGPLPPHLALK2E+23 | sp Q08211 DHX9_HUMAN  |
| 9815 | GHYEVTGSDDDETGKLQSGVSLASK200                      | sp Q09666 AHNK_HUMAN  |
|      |                                                   | sp P49792 RBP2_HUMAN  |
|      |                                                   | sp Q7Z3J3 RGPD4_HUMAN |
| 9816 | EDALDDSVSSSVHASPLASSPVRK200020002000000           | sp A6NKT7 RGPD3_HUMAN |
|      |                                                   | sp O14715 RGPD8_HUMAN |
|      |                                                   | sp Q99666 RGPD5_HUMAN |
| 9817 | SPSPPPTRR2020000000                               | sp Q8IYB3 SRRM1_HUMAN |
| 9818 | TSPADHGGSVGSESGSAVDSVAGEHSVSGR2.000000200202E+30  | sp Q5T4S7 UBR4_HUMAN  |
| 9819 | KLPPPPGSPFLGHSPTASPPPTAR200002000000000000        | sp O95785 WIZ_HUMAN   |
| 9820 | KASSEGGTAAGAGLDSLHK20000000000000000000           | sp O15143 ARC1B_HUMAN |
| 9821 | LGSSGLGSASSIQAAVR200000000000000000               | sp Q7Z6Z7 HUWE1_HUMAN |
| 9822 | AAQQAASSSGGQQAQTPTGK200000                        | sp P48729 KC1A_HUMAN  |
| 9823 | ERSDSGGSSSEPFDR2020020000000000                   | sp P48634 PRC2A_HUMAN |
| 9824 | SRTPLLPR200000000                                 | sp Q9UQ35 SRRM2_HUMAN |
| 9825 | AHSSPASLQLGAVSPGTLTPTGVVSGPAATPTAQHLR2E+31        | sp P46937 YAP1_HUMAN  |
| 9826 | AQSTDSLGTSGSLQSK2200000000000000                  | sp Q15276 RABE1_HUMAN |
| 9827 | LPASPSGSEDLSSVSSPTSSPK20200000                    | sp Q9P2N6 KANL3_HUMAN |
| 9828 | STGSATSLASQGER220000000200000                     | sp Q5SW79 CE170_HUMAN |
| 9829 | QQPPLGPSSLLSLPGLK200002000000                     | sp Q4KMP7 TB10B_HUMAN |
| 9830 | SASPYPHSLSSPQR200020000000000                     | sp Q5T200 ZC3HD_HUMAN |
| 9831 | YIEIDSDEEPR2000000                                | sp Q9NVU7 SDA1_HUMAN  |
| 9832 | ALEAASLQHPPLSLCISDSEEEEEER2.00000000002E+21       | sp O43159 RRP8_HUMAN  |
| 9833 | QLGDSSGEGPEFVEEEEEVALRSDSEGSYTPGK2000020300000    | sp Q14839 CHD4_HUMAN  |
| 9834 | GHHVTDSENDEPLNLNASDSESEELHR2.000000000002E+23     | sp Q96ST2 IWS1_HUMAN  |
| 9835 | ASPVSFQELNR200000000000                           | sp P15822 ZEP1_HUMAN  |
| 9836 | SSPPLRTPDVLESSGPAVR2.2E+19                        | sp O75676 KS6A4_HUMAN |
| 9837 | SRSYSPAHR20230000000                              | sp Q9Y2W1 TR150_HUMAN |
| 9838 | LSGEHSESSTPRPR2002000000                          | sp Q7Z3K3 POGZ_HUMAN  |
| 9839 | LQEEGGSDDEETGSPSEDGMQSAR200000000000              | sp Q13610 PWP1_HUMAN  |
| 9840 | YVTKPNSDDEDDGDEKEDDEEDKDDVPGPSTGGSLR2E+30         | sp P51784 UBP11_HUMAN |
| 9841 | AASDPLSSVSPAVSK200000002000200                    | sp P19532 TFE3_HUMAN  |
| 9842 | SRSGSSQELDVKPSASPQR2.02022E+20                    | sp Q9UQ35 SRRM2_HUMAN |
| 9843 | VLSTSSLTR2220000                                  | sp P16144 ITB4_HUMAN  |
| 9844 | QLSALSSDGEGQGRPVPVR200000000000000000             | sp O15438 MRP3_HUMAN  |
| 9845 | RRSPSLSSK20200000                                 | sp Q8IYB3 SRRM1_HUMAN |
| 9846 | VNSNGKESPGSSEFFQEAVSHGK2.00002002E+21             | sp Q8N108 MIER1_HUMAN |
| 9847 | SPPREGSQGELTPANSQSR2.000002E+19                   | sp Q13098 CSN1_HUMAN  |
| 9848 | TLVITSTPASPVR20000                                | sp Q8TBN0 R3GEF_HUMAN |
| 9849 | ETDEAAFEFDYNESDSESNVSVK20200002000                | sp Q7Z6E9 RBBP6_HUMAN |
| 9850 | APQTSSSPPVVR2002000000                            | sp Q8IYB3 SRRM1_HUMAN |

|      |                                                    |                       |
|------|----------------------------------------------------|-----------------------|
| 9851 | EPLIPASPK2000                                      | sp Q9Y613 FHOD1_HUMAN |
| 9852 | KKSPIINESR200000200                                | sp Q13523 PRP4B_HUMAN |
| 9853 | VEEVEDVSPGPWGLVK2000000000                         | sp O15061 SYNEM_HUMAN |
| 9854 | TDSEKPFRRSQSPK2000000002000                        | sp Q9Y2W1 TR150_HUMAN |
| 9855 | TPQEWAPQTAR200000000000                            | sp Q5JTV8 TOIP1_HUMAN |
| 9856 | RASISEPSDTPDPEPR20000000000000                     | sp Q8N1F8 S11IP_HUMAN |
| 9857 | IPSIVSSPLNSPLDR20000200000                         | sp P49790 NU153_HUMAN |
| 9858 | SPSLLQSGAK200020000                                | sp Q9BQG0 MBB1A_HUMAN |
| 9859 | DLELALSPIHNSSALPTTGR2000000000000000               | sp Q96GX5 GWL_HUMAN   |
| 9860 | KHSVSPPPYPGHTK2020000000000000                     | sp Q9BZD6 TMG4_HUMAN  |
| 9861 | LSGEHSESSTPRPR2020000000                           | sp Q7Z3K3 POGZ_HUMAN  |
| 9862 | LLPEGEETLESDDKDEHTSK200000000000                   | sp Q8N6N3 CA052_HUMAN |
| 9863 | SYISPHSSPHTPTR2200000000                           | sp Q96BY7 ATG2B_HUMAN |
| 9864 | VNSNGKESPGSSEFFQEAVSHGK2.000000002E+21             | sp Q8N108 MIER1_HUMAN |
| 9865 | EDSSDSENAEPDLDDNEDEEPAVEIEPEPEPQVPTAPPPAK2.202E+41 | sp P49711 CTCF_HUMAN  |
| 9866 | VSEVEEKEPVPQPLPSDDTR2E+20                          | sp O43290 SNUT1_HUMAN |
| 9867 | RDSFDDRGPSLNPVLDYDHGSR2E+20                        | sp P43243 MATR3_HUMAN |
| 9868 | RYSGSDSDSISEGK30000202000000                       | sp O14646 CHD1_HUMAN  |
| 9869 | IISPGSSTPSSTR220000000                             | sp Q5VT52 RPRD2_HUMAN |
| 9870 | KGSGKRPAAGASASPR200000000000002000                 | sp Q96S55 WRIP1_HUMAN |
| 9871 | KNESSDEISDAEQMPQHTLK220002000000000000             | sp Q3L8U1 CHD9_HUMAN  |
| 9872 | YYSDDDELTVQR30020000000000                         | sp Q8NFC6 BD1L1_HUMAN |
| 9873 | QPSPPSPPTER2020200000                              | sp P29590 PML_HUMAN   |
| 9874 | LASAQEVAGSTSAK20000000000000                       | sp Q8IYL3 CA174_HUMAN |
| 9875 | TPESTKPGPVCQPPVSQSR2E+19                           | sp Q6AI12 ANR40_HUMAN |
| 9876 | GYSPYSVSGSGSTAGSR20000000000000                    | sp Q15149 PLEC_HUMAN  |
| 9877 | RESESEDETPPAAPQLIKK2020200000000000000             | sp O60832 DKC1_HUMAN  |
| 9878 | SGCSEAQPPEPETR200000                               | sp Q9Y6A5 TACC3_HUMAN |
| 9879 | KETPPSPFESDK20000000000                            | sp Q96BT7 ALKB8_HUMAN |
| 9880 | SLVMHTPPVLK200002000000                            | sp P46013 KI67_HUMAN  |
| 9881 | YISENESPRPSQK20000000                              | sp O94782 UBP1_HUMAN  |
| 9882 | ETINLDTSSSDFTILQEIEEPSLEPENEK2E+29                 | sp Q15424 SAFB1_HUMAN |
| 9883 | LDSSMDHSENYDTMSSPLPGK2.0010000000301E+21           | sp Q9NTI5 PDS5B_HUMAN |
| 9884 | EHYPVSSPSSPPAQPGGVSR220000000000000000             | sp O75179 ANR17_HUMAN |
| 9885 | SAASPVVSSMPERASESSSEEKDDYEIFVK202200000000000000   | sp P18583 SON_HUMAN   |
| 9886 | LSSASTGKPLSVEDDFEK22000000000000000000             | sp O75152 ZC11A_HUMAN |
| 9887 | TTAPTEGKSPLK20000                                  | sp Q96T37 RBM15_HUMAN |
| 9888 | APPQTHLPSGASSGTGSASATHGGSPGTR200000000000          | sp P46379 BAG6_HUMAN  |
| 9889 | HHSSSSQSGSSIQR22000000000                          | sp Q5T200 ZC3HD_HUMAN |
| 9890 | EAQQKVPDEEENEESDNEKETEK2000000000                  | sp P11388 TOP2A_HUMAN |
| 9891 | STPLASPSPSGRSPQR200000000                          | sp Q8WYP5 ELYS_HUMAN  |
| 9892 | GPSQATSPIR200200000                                | sp Q7RTP6 MICA3_HUMAN |
| 9893 | YHTPPRSR2000200                                    | sp P30414 NKTR_HUMAN  |
| 9894 | SSSTSDILEPFTVER20000000000000                      | sp Q6GYQ0 RGPA1_HUMAN |
| 9895 | STSPIIGSPPVR20000200000                            | sp Q86TB9 PATL1_HUMAN |
| 9896 | VRHSDPDPSPR200020000                               | sp Q9BRD0 BUD13_HUMAN |
| 9897 | RGPSPPASPTR200000200                               | sp Q6P5Z2 PKN3_HUMAN  |
| 9898 | SDGACDSPSSDKENSSQIAQDHQK2.00000000000002E+24       | sp Q9UIG0 BAZ1B_HUMAN |
| 9899 | DLESCDDDNQGSKSPK2000000002000                      | sp Q5T3I0 GPTC4_HUMAN |
| 9900 | SGLQLSLEQGTGENSFR200002000000002000                | sp P23497 SP100_HUMAN |
| 9901 | SLSSSLDDTEVKK202000000000                          | sp O95292 VAPB_HUMAN  |
| 9902 | KSEAKQMPR200001000                                 | sp Q15345 LRC41_HUMAN |
| 9903 | APPSPGSLAAPGR200000000000                          | sp Q9Y4B5 MTCL1_HUMAN |

|      |                                                 |                        |
|------|-------------------------------------------------|------------------------|
| 9904 | TPTPSTPGDTQPNT PAPVPPAEDGIK2. 0000000020002E+26 | sp Q14839 CHD4_HUMAN   |
| 9905 | RPGNSTVTSSPPVTPK200000002000                    | sp Q7Z2Z1 TICRR_HUMAN  |
| 9906 | VSDSESEGPQKGPASDSETEASR2. 0200000000202E+21     | sp Q96ST2 IWS1_HUMAN   |
| 9907 | NMTVEQLLTGSPTSPTVEPEKPTR2. 000002E+22           | sp Q9C0C9 UBE20_HUMAN  |
| 9908 | NPSSSVPPPSAGSVK20000000000000                   | sp Q8WWI1 LMO7_HUMAN   |
| 9909 | AGIPQHHPMAQNLQYPDDSDDEKK2000000                 | sp Q15223 PVRL1_HUMAN  |
| 9910 | ESSAAQAGSHATHPGTSVLEGAAGSMSPSR120000            | sp Q5SYE7 NHSL1_HUMAN  |
| 9911 | SSSSSQESLNRPLSAK20000000000000                  | sp Q7Z460 CLAP1_HUMAN  |
| 9912 | SLDGAEFSPASVSENHDAGPDGDKR2. 00000020002E+26     | sp Q9H4G0 E4IL1_HUMAN  |
| 9913 | SSISSHESFSLDSGIYR202200000000000000             | sp Q9UPZ3 HPS5_HUMAN   |
| 9914 | LLRPLSPVTPPPNSGSK20020000000000                 | sp Q9C0A6 SETD5_HUMAN  |
| 9915 | TASTPTPPQTGGGLEPQANGETPQVAVIVRPPDR2. 02E+31     | sp Q04637 IF4G1_HUMAN  |
| 9916 | SPSPIGVGSEMCR20200000000000                     | sp Q9Y4B5 MTCL1_HUMAN  |
| 9917 | TAANKSPCETISSPSSTLESK22000000000                | sp Q9C0D5 TANC1_HUMAN  |
| 9918 | SPPRPPR20000000                                 | sp P21127 CD11B_HUMAN  |
| 9919 | SPPITPNWR2000200000                             | sp Q9UQ88 CD11A_HUMAN  |
| 9920 | NIISPPWDFR20000000                              | sp Q9UKB5 AJAP1_HUMAN  |
| 9921 | DVTNFTVGGFAPMSPR12000                           | sp P26045 PTN3_HUMAN   |
| 9922 | KFQEQECPPSPEPTR2000000                          | sp Q13042 CDC16_HUMAN  |
| 9923 | FGSTGSTPPVSPTSER202200020000000                 | sp 000267 SPT5H_HUMAN  |
| 9924 | SAPASPTHPLMSPR2000002000012000                  | sp P62070 RRAS2_HUMAN  |
| 9925 | SDSQASLTVPLSPQVVR200000000002000000             | sp Q969V6 MKL1_HUMAN   |
| 9926 | ADSGYLFSGSRPPSQVSR200200                        | sp P85037 FO XK1_HUMAN |
| 9927 | ASQTPVPPGAPSPDKDPAKESPKPEEQK200000000200000000  | sp Q8TEV9 SMCR8_HUMAN  |
| 9928 | NVPESPHSPCEGLPSEAALTPRPEGK2E+19                 | sp Q5SNT2 TM201_HUMAN  |
| 9929 | DSL GAYASQDANEQGQDLGK2E+19                      | sp Q15911 ZFH X3_HUMAN |
| 9930 | ETPRPEGGSPAGTPPQPK2. 0000000000002E+19          | sp A7E2V4 ZSWM8_HUMAN  |
| 9931 | DEEPSGWEEPSQISIR20000000                        | sp Q9C0C2 TB182_HUMAN  |
| 9932 | TDHGAEIVYKSPVVGDTSPR200000022000                | sp Q9BR39 JPH2_HUMAN   |
| 9933 | KGSVDQYLLR200000000                             | sp Q9UPQ9 TNR6B_HUMAN  |
| 9934 | GRASSHSSQTQGGGSVTK2000000000000000              | sp P10636 TAU_HUMAN    |
| 9935 | IDEDGENTQIEDTEPMSPVLNSK20000000                 | sp TAU_HUMAN           |
| 9936 | STSAPQMSPGSSDNQSSSPQPAQQK200020000000000        | sp Q8NCN4 RN169_HUMAN  |
| 9937 | LDSQPQETSPELPR2000002000000                     | sp P02545 LMNA_HUMAN   |
| 9938 | AGSPDVLR2000000                                 | sp Q12888 TP53B_HUMAN  |
| 9939 | LSLEGDHSTPPSAYGSVK200000000000                  | sp Q14157 UBP2L_HUMAN  |
| 9940 | ASPVTSPAAAFPTASPANK200000000200000              | sp O14545 TRAD1_HUMAN  |
| 9941 | SPPRPCGLNHSDLSR20000000000020000                | sp Q8NDX6 ZN740_HUMAN  |
| 9942 | TSDANETEDHLESLICK200000000000                   | sp P07355 ANXA2_HUMAN  |
| 9943 | DLDEDELLGNLSETELK2000000                        | sp A6NMY6 AXA2L_HUMAN  |
| 9944 | QSSFEPDDVPLPAGWEMAK2E+19                        | sp Q9UIF9 BAZ2A_HUMAN  |
| 9945 | RRSPSPTPTGPSR2000200000000                      | sp Q9H8M5 CNNM2_HUMAN  |
| 9946 | IWDPTPSHTPAGAATPGR20000                         | sp Q09161 NCBP1_HUMAN  |
| 9947 | YMAENPTAGVVQEEEEEDNLEYSDGNPIAPTCK200000000000   | sp Q9NYL9 TMOD3_HUMAN  |
| 9948 | RVSLEPHQPGTPESK200000000000200                  | sp P46937 YAP1_HUMAN   |
| 9949 | EEASLLSHSPGTSNQSQPCSPKPIR20002000000            | sp P49450 CENPA_HUMAN  |
| 9950 | VQTTTPPAVQGQK200000000000                       | sp O75533 SF3B1_HUMAN  |
| 9951 | TVLGPDTAEPATAEAAVAPPDAGLPLPLPAEGSPPPK200000     | sp Q86XP3 DDX42_HUMAN  |
| 9952 | KLSSSEPEYEEDEFNDDQSIK2200000000000000           | sp Q14980 NUMA1_HUMAN  |
| 9953 | ESGVVAVSPEKSESPQKEDGLSSQLK2. 0000000002E+25     | sp Q9H4Z3 PCIF1_HUMAN  |
|      |                                                 | sp Q2M2I8 AAK1_HUMAN   |
|      |                                                 | sp Q92667 AKAP1_HUMAN  |
|      |                                                 | sp Q9H4L7 SMRCD_HUMAN  |
|      |                                                 | sp Q96T58 MINT_HUMAN   |



|      |                                                                |                       |
|------|----------------------------------------------------------------|-----------------------|
| 9954 | DHNVGSPPKSPTHASQHTQTEK200000000000000000                       | sp A0JNW5 UH1BL_HUMAN |
| 9955 | APLVPPPPPPPPPPPLPDPTPEPEEEILGSDDEEQEDPADYCK20000000<br>0000000 | sp P78362 SRPK2_HUMAN |
| 9956 | SGEQITSSPVSPK20000020002000                                    | sp 043314 VIP2_HUMAN  |
| 9957 | SPSKPPGPNR20000000000                                          | sp Q92766 RREB1_HUMAN |
| 9958 | SQGSPEDESAPQASPGPSK2000000000000000                            | sp Q9P107 GMIP_HUMAN  |
| 9959 | YRSPYSGPK20020000                                              | sp Q14498 RBM39_HUMAN |
| 9960 | GEIKDSSPSSSPK2202000                                           | sp Q6WKZ4 RFIP1_HUMAN |
|      |                                                                | sp P01891 1A68_HUMAN  |
|      |                                                                | sp P10316 1A69_HUMAN  |
| 9961 | GGSYSQAASSDSAQGSVSLTACK20002000000000                          | sp P05534 1A24_HUMAN  |
|      |                                                                | sp P30447 1A23_HUMAN  |
|      |                                                                | sp Q09160 1A80_HUMAN  |
|      |                                                                | sp P01892 1A02_HUMAN  |
| 9962 | RHSPSPRPR20200000                                              | sp Q8IYB3 SRRM1_HUMAN |
| 9963 | QPASAQSTPSTTPHSSPK2000000000000000                             | sp Q96A73 P33MX_HUMAN |
| 9964 | ANQISPSNSSLK200000000                                          | sp Q86UU0 BCL9L_HUMAN |
|      |                                                                | sp Q9TNN7 1C05_HUMAN  |
|      |                                                                | sp P04222 1C03_HUMAN  |
|      |                                                                | sp Q07000 1C15_HUMAN  |
|      |                                                                | sp Q29865 1C18_HUMAN  |
|      |                                                                | sp Q29960 1C16_HUMAN  |
| 9965 | GGSCSQAASSNSAQGSDESLIACKA200020020000000                       | sp Q29963 1C06_HUMAN  |
|      |                                                                | sp P30504 1C04_HUMAN  |
|      |                                                                | sp P30505 1C08_HUMAN  |
|      |                                                                | sp P30508 1C12_HUMAN  |
|      |                                                                | sp P30510 1C14_HUMAN  |
|      |                                                                | sp Q95604 1C17_HUMAN  |
| 9966 | YGSQEHPIGDK2000000000                                          | sp Q14644 RASA3_HUMAN |
| 9967 | EGLSGDALSSPSAPEPVVGTDDK2E+21                                   | sp Q92503 S14L1_HUMAN |
| 9968 | GPKPEPPGSGSPAPRR2020000000                                     | sp Q9UKJ3 GPTC8_HUMAN |
| 9969 | ASLVALPEQTASEEETPPPLTK2020000000000000                         | sp Q9UKV3 ACINU_HUMAN |
| 9970 | SASPSVPGTPKPKPK2020000000000000                                | sp Q03164 KMT2A_HUMAN |
| 9971 | SQSSHSYDDSTLPLIDR2002000000000000                              | sp 060716 CTND1_HUMAN |
| 9972 | IQPAGNTSPR2000                                                 | sp P49674 KC1E_HUMAN  |
| 9973 | RESESEDETPPAAPQLIK2000020000000000                             | sp 060832 DKC1_HUMAN  |
| 9974 | SMGSQEDDSGNKPSSYS20                                            | sp Q9UNS2 CSN3_HUMAN  |
| 9975 | SRSPQWR200000                                                  | sp Q9UQ35 SRRM2_HUMAN |
| 9976 | RGEGDAPFSEPGTTSTQRPSSPETATK200000000000                        | sp Q9UQ35 SRRM2_HUMAN |
| 9977 | KYILQATNTR3000020200                                           | sp P82987 ATL3_HUMAN  |
| 9978 | TAHNSEADLEESFNEHELEPSSPK2E+20                                  | sp Q8IWS0 PHF6_HUMAN  |
| 9979 | SPSPAHLPDDPK2020000000000                                      | sp Q92615 LAR4B_HUMAN |
| 9980 | TSPASLDFPESQK2000000000000                                     | sp Q96JM3 CHAP1_HUMAN |
| 9981 | HQEVQDQDPVFQGSDDSGYQSDHKK20000000000                           | sp Q3B726 RPA43_HUMAN |
|      |                                                                | sp P49792 RBP2_HUMAN  |
|      |                                                                | sp Q7Z3J3 RGPD4_HUMAN |
| 9982 | EDALDDSVSSSVHASPLASSPVR200000000000020000                      | sp A6NKT7 RGPD3_HUMAN |
|      |                                                                | sp 014715 RGPD8_HUMAN |
|      |                                                                | sp Q99666 RGPD5_HUMAN |
| 9983 | TYSLTTPAR200000                                                | sp Q9Y4H2 IRS2_HUMAN  |
| 9984 | DSMSCGLDSEGATPPPVGRLR2000200000000                             | sp Q99956 DUS9_HUMAN  |
| 9985 | HVTLPSSPRNTPMGDKDDDDDDADEK2.00202E+22                          | sp Q5T4S7 UBR4_HUMAN  |
| 9986 | IPCDSPQSDPVDTPSTK200000002000000                               | sp P46013 KI67_HUMAN  |

|       |                                            |                       |
|-------|--------------------------------------------|-----------------------|
| 9987  | YFDSGDYNMAK200001000                       | sp P56211 ARP19_HUMAN |
|       |                                            | sp 043768 ENSA_HUMAN  |
| 9988  | NYQQNYQNSSEGEKNEGSESAPPEGQAQQR2000000000   | sp P67809 YBOX1_HUMAN |
| 9989  | SATRPSPER2000000                           | sp Q9UQ35 SRRM2_HUMAN |
| 9990  | QQSIEDKEDKPPPR200000000000                 | sp Q5JSZ5 PRC2B_HUMAN |
| 9991  | QQLSPSPGQEAGILPETEK20000000000000          | sp Q17RY0 CPEB4_HUMAN |
| 9992  | LPSGSGAASPTGSAVDIR20002000000              | sp Q09666 AHNK_HUMAN  |
| 9993  | RPSESDKEDELKVK2020000000000                | sp Q02952 AKA12_HUMAN |
| 9994  | NKPLSPIK20000                              | sp P35251 RFC1_HUMAN  |
| 9995  | SLAASSPPPCSQPSQCPEEKPESSPMK2E+23           | sp Q7Z6J9 SEN54_HUMAN |
| 9996  | SPHQLLSPSSFSPSATPSQK2202000000000          | sp Q14181 DPOA2_HUMAN |
| 9997  | HGGSPQPLATTPSQEPVNPPEASPTR2.0000022E+25    | sp Q9UQ35 SRRM2_HUMAN |
| 9998  | SRSLSSPR202022000                          | sp Q9UQ35 SRRM2_HUMAN |
| 9999  | KTEFLDLDNSPLSPSPR2000                      | sp Q8NCF5 NF2IP_HUMAN |
| 10000 | RQSVSPPYKEPSAYQSSTR200000000200000000      | sp Q9NYV4 CDK12_HUMAN |
| 10001 | LEGNPQGSNQGK20002000000                    | sp P61006 RAB8A_HUMAN |
| 10002 | TASISSPSEGTPTVGSYGCTPQSLPK2.02E+27         | sp Q6PKG0 LARP1_HUMAN |
|       |                                            | sp Q03252 LMNB2_HUMAN |
| 10003 | LKLSPSSR20000200                           | sp P20700 LMNB1_HUMAN |
|       |                                            | sp Q96RT1 LAP2_HUMAN  |
| 10004 | TEPHSDCSVDLGISK2000000200000000            | sp Q4LE39 ARI4B_HUMAN |
| 10005 | LSKPPFQTNPSEMVS20000000000                 | sp Q6PKG0 LARP1_HUMAN |
| 10006 | NALPPVLTVNGQSPPEHSAPAK20000000000          | sp 015231 ZN185_HUMAN |
| 10007 | RESCGSSVLTDFEGK20000000000                 | sp Q8TF01 PNISR_HUMAN |
| 10008 | SPSPVQEEHSDPEMTEEEK2.020000002E+20         | sp P85037 FOXK1_HUMAN |
| 10009 | SAPASPHGLMSR200000000012000                | sp Q9BZE4 NOG1_HUMAN  |
| 10010 | KREDSAPPSSVAR2000020000                    | sp P42566 EPS15_HUMAN |
| 10011 | LDSDPFK2000000                             | sp P19634 SL9A1_HUMAN |
| 10012 | LDSPTMSR200                                | sp Q86UU1 PHLB1_HUMAN |
| 10013 | TRSPSPTLGESLAPHK2000200000000000           | sp Q6GYQ0 RGPA1_HUMAN |
| 10014 | RGSSPGSLEIPK20002000000                    | sp P25054 APC_HUMAN   |
| 10015 | DIQRPDSEHGLSPDSENFWDK2000020000000000      | sp Q02078 MEF2A_HUMAN |
| 10016 | ESPSVKR20000                               | sp Q06413 MEF2C_HUMAN |
|       |                                            | sp Q9NWT1 PK1IP_HUMAN |
| 10017 | ESLPPAAEPSVSK200000                        | sp Q9C0C9 UBE20_HUMAN |
| 10018 | NMTVEQLLTGSPTSPTVEPEKPTR20200000000000     | sp P27987 IP3KB_HUMAN |
| 10019 | ARSPSPCFR202000000                         | sp Q12888 TP53B_HUMAN |
| 10020 | SKLPDGTGSSEEEEFLEIPPFNK2200000000000000    | sp Q92609 TBCD5_HUMAN |
| 10021 | SEMPVQLNK200000000                         | sp P17676 CEBPB_HUMAN |
| 10022 | AYLGYQAVPSGSSGLSTSSSSPPGTPSPADAK2E+20      | sp Q9BU76 MMTA2_HUMAN |
| 10023 | RPAEATSSPTSPERPR2000000                    | sp Q6VY07 PACS1_HUMAN |
| 10024 | TNSSDSERSPD LGHSTQIPR2.02E+20              | sp Q9H4G0 E41L1_HUMAN |
| 10025 | HQASINELKR20000000                         | sp Q9Y5J1 UTP18_HUMAN |
| 10026 | KTSSDDESEDEDDLQR2200000000000000           | sp 060885 BRD4_HUMAN  |
| 10027 | IHSPIIR200000                              | sp P42566 EPS15_HUMAN |
| 10028 | FHDTSSPLLISGTSAAELPWAVKPEDK2E+22           | sp Q8IZP0 ABI1_HUMAN  |
| 10029 | HNSTTSSTSSGGYR2000000000000                | sp P18583 SON_HUMAN   |
| 10030 | SAASPVSSMPERASESSSEKDDYEIFVK22000003000000 | sp Q9UQ35 SRRM2_HUMAN |
| 10031 | SRTSPAPWKR20020000000                      | sp Q9P275 UBP36_HUMAN |
| 10032 | RGSSSSPEHSASSDSTK2200000000000000          | sp Q13085 ACACA_HUMAN |
| 10033 | IFDEVMGCFSDSPQSPTFPEAGHTSLYDEDKVPR2E+20    | sp P62753 RS6_HUMAN   |
| 10034 | LSSLRASTK200002000                         | sp Q8IY17 PLPL6_HUMAN |
| 10035 | MVSTSATDEPR2000000000                      | sp Q8N1G0 ZN687_HUMAN |
| 10036 | QESCPHHPQVLAQQGSGSPK22000                  | sp 015027 SC16A_HUMAN |
| 10037 | VLSSAASLPGSELSSRPEGSQGGELSR200             |                       |

|       |                                                    |                       |
|-------|----------------------------------------------------|-----------------------|
| 10038 | LFRPPSPAPAAPGAR20000000000                         | sp Q86U90 YRDC_HUMAN  |
| 10039 | TPSTPVACSTPAQLK200000000000                        | sp Q6PL18 ATAD2_HUMAN |
| 10040 | KQPPVSPGTALVGSQK200000000                          | sp P17096 HMGA1_HUMAN |
| 10041 | RGSDIDNPTLTVMDISPPSR2000000200000                  | sp Q9Y2U5 M3K2_HUMAN  |
| 10042 | TPPKSPSSAK20002000000                              | sp TAU_HUMAN          |
|       |                                                    | sp P10636 TAU_HUMAN   |
| 10043 | ATSPSSSVSGDFDDGHHSVSTPGPSR2. 202E+21               | sp Q86U86 PB1_HUMAN   |
| 10044 | MHTPPALPR20000000                                  | sp Q9H2S9 IKZF4_HUMAN |
| 10045 | SPQTLAPVGEDAMKTPSPAAEDAREPEAK2. 00000000000002E+29 | sp Q92797 SYMPK_HUMAN |
| 10046 | QAQTQTSPEHLVLLQK2000000000000                      | sp Q9ULV3 CIZ1_HUMAN  |
| 10047 | SPQPVPSPRPQSQPPHSSPSR20000200000000000             | sp Q09472 EP300_HUMAN |
| 10048 | RPSVASSVSEEFYFEVR200220000000000                   | sp A6ND36 FA83G_HUMAN |
|       |                                                    | sp P30510 1C14_HUMAN  |
|       |                                                    | sp Q9TNN7 1C05_HUMAN  |
|       |                                                    | sp P04222 1C03_HUMAN  |
|       |                                                    | sp Q07000 1C15_HUMAN  |
|       |                                                    | sp Q29865 1C18_HUMAN  |
| 10049 | GGSCSQAASSNSAQGSDESLIACKA200020000000000           | sp Q29960 1C16_HUMAN  |
|       |                                                    | sp Q29963 1C06_HUMAN  |
|       |                                                    | sp P30504 1C04_HUMAN  |
|       |                                                    | sp P30505 1C08_HUMAN  |
|       |                                                    | sp P30508 1C12_HUMAN  |
|       |                                                    | sp Q95604 1C17_HUMAN  |
|       |                                                    | sp P49792 RBP2_HUMAN  |
|       |                                                    | sp Q7Z3J3 RGPD4_HUMAN |
| 10050 | EDALDDSVSSSSVHASPLASSPVRK2. 02000000000002E+19     | sp A6NKT7 RGPD3_HUMAN |
|       |                                                    | sp O14715 RGPD8_HUMAN |
|       |                                                    | sp Q99666 RGPD5_HUMAN |
| 10051 | SPERPTGDLR20000000000                              | sp Q5T200 ZC3HD_HUMAN |
| 10052 | HSPTSEPTPPGDALPPVSSPHTHR200000000020000000         | sp Q9H6S3 ESL2_HUMAN  |
| 10053 | TTSSANNPNLMYQDECRR20000000000000000                | sp Q92841 DDX17_HUMAN |
| 10054 | VSEEQTQPPSPAGAMSTAMGR2. 00000000000001E+21         | sp Q16666 IF16_HUMAN  |
| 10055 | VEETSPLGNAR20000000                                | sp P30414 NKTR_HUMAN  |
| 10056 | VKPPPQISPSK20000                                   | sp Q9H6U6 BCAS3_HUMAN |
| 10057 | TSPTTPEASATNSPCTSKPATPAPSEK2. 2E+24                | sp Q12873 CHD3_HUMAN  |
| 10058 | SVLPTAIPAVLPAASPCSSPK20002000                      | sp O94806 KPCD3_HUMAN |
| 10059 | SFSLASSNSPISQR20020000000000                       | sp Q9BXB4 OSB11_HUMAN |
| 10060 | RIDFTPVSPAPSPTR200020000                           | sp Q7Z309 F122B_HUMAN |
| 10061 | MQNNSPSPISNTSFTSDGSPSPLGGIK22000000000000000       | sp Q9H0D6 XRN2_HUMAN  |
| 10062 | SGYHDDSDEDLLE20000000                              | sp Q99523 SORT_HUMAN  |
| 10063 | GPTTGEGALDLSDVHSPPKSPEGK200000                     | sp O95684 FR10P_HUMAN |
| 10064 | QQPQPSQTESPQEAQIIQAK200000000000000                | sp O96020 CCNE2_HUMAN |
| 10065 | SPSPLRGNVVPSPLPTR202000000000000000                | sp Q9Y2V2 CHSP1_HUMAN |
| 10066 | RSELSR20202000                                     | sp Q99590 SCAFB_HUMAN |
| 10067 | SPTAPSVFSPTGNR20000000000000                       | sp Q9H3P2 NELFA_HUMAN |
| 10068 | KPLTTSGFHHSEEGTSSSGSK20000                         | sp Q5SW79 CE170_HUMAN |
| 10069 | IAAPELHKGSDSEDEPTK200000000                        | sp Q92733 PRCC_HUMAN  |
|       |                                                    | sp Q71DI3 H32_HUMAN   |
| 10070 | KSAPATGGVK2000000000                               | sp Q16695 H31T_HUMAN  |
|       |                                                    | sp P68431 H31_HUMAN   |
| 10071 | SLGGESSGGTTPVGSFHTEAAR2. 00002E+22                 | sp O15085 ARHGB_HUMAN |
| 10072 | ASAPERTPSPAPK2000000200000                         | sp Q63ZY6 NSN5C_HUMAN |
| 10073 | SPLQSAESSPTAGK200020002000000                      | sp Q8IWB9 TEX2_HUMAN  |
| 10074 | TAPPALPTGYDSEEEEEERPMYSYDEK2E+19                   | sp P25440 BRD2_HUMAN  |

|       |                                                      |                       |
|-------|------------------------------------------------------|-----------------------|
| 10075 | NSPLDCGSASPnk2000000020000                           | sp 075179 ANR17_HUMAN |
| 10076 | KFPSPPHSSNGHSPQDTSTSPIK2.0002E+20                    | sp Q9ULU4 PKCB1_HUMAN |
| 10077 | KPSPAASPATK2000200000                                | sp Q8N3F8 MILK1_HUMAN |
| 10078 | GQSQTSPDHRSDTSSPEVR202200000000200000                | sp Q9UQ35 SRRM2_HUMAN |
| 10079 | SPSPAHLPPDDPK20000000000                             | sp Q92615 LAR4B_HUMAN |
| 10080 | AQTPPGPSLSGSKSPCQEK2000000000                        | sp Q9UQ35 SRRM2_HUMAN |
| 10081 | RSKSDGEAKPEPSPSPR2020000000000000                    | sp P26358 DNMT1_HUMAN |
| 10082 | GSVILDSGHLSTASSDDLKGEESFR220222000000000000          | sp Q92614 MY18A_HUMAN |
| 10083 | KSLSPGVSR202000200                                   | sp Q9UKV3 ACINU_HUMAN |
| 10084 | SDGAPASDSKPGSSEAAPSSK2000000000000000                | sp P80723 BASP1_HUMAN |
| 10085 | WPGSPTSR200000                                       | sp 043524 FOXO3_HUMAN |
| 10086 | SRSPSPAPEKK202020000000                              | sp Q8IYB3 SRRM1_HUMAN |
| 10087 | GQTPLTEGSEDLDGHSDPEESFAR2.0020000000002E+22          | sp Q86VR2 F134C_HUMAN |
| 10088 | DTLSNPQSPQSPYNSPKPQHK2.0002000203E+19                | sp Q96PU5 NED4L_HUMAN |
| 10089 | VSTLAGPSSDENEESKPEKEDEPQEDAK2E+22                    | sp Q9ULT8 HECD1_HUMAN |
| 10090 | SRSPLAIR2000000                                      | sp Q9UQ35 SRRM2_HUMAN |
| 10091 | RRSPSPYYSR2000000                                    | sp Q13595 TRA2A_HUMAN |
| 10092 | VDGPRSPSYGR2020000                                   | sp P62995 TRA2B_HUMAN |
| 10093 | NSSQSGGKPGSSPITK200000                               | sp Q07955 SRSF1_HUMAN |
| 10094 | SVLSEVNSK2002000000                                  | sp Q15648 MED1_HUMAN  |
| 10095 | SVQEGENPDDGVRGSPPEDYR2.00000000000002E+21            | sp Q9HCS5 E41LA_HUMAN |
| 10096 | VKASPIITNDGEDEFVPSDGLDKDEYTFSPGK2E+28                | sp P42696 RBM34_HUMAN |
| 10097 | TSSGTKPSVKPTSATK200                                  | sp Q02880 TOP2B_HUMAN |
| 10098 | DGKSPVPCLEEEAGEPLGGK200000000000000000               | sp Q14966 ZN638_HUMAN |
| 10099 | EDKSPETGTAGGSSTASYSAGR2000000000000000               | sp A1L390 PKHG3_HUMAN |
| 10100 | EVQAEQPSSSSPR20000                                   | sp Q8NFC6 BD1L1_HUMAN |
| 10101 | CLVAGLLSPR2000                                       | sp Q9Y388 RBMX2_HUMAN |
| 10102 | RLTTGTPASPR2002000000                                | sp Q8WYP5 ELYS_HUMAN  |
| 10103 | SPPPGMGLNQNR2000010000000                            | sp Q99501 GA2L1_HUMAN |
| 10104 | SPTPPSAGLGSNSAPPIDSR2.02002200002E+22                | sp P23246 SFPQ_HUMAN  |
| 10105 | RKAEDSDSEPEPEDNVR2020000000000                       | sp Q8IWX8 CHERP_HUMAN |
| 10106 | SFSLASSNSPISQR20000000000002000                      | sp Q9H0D6 XRN2_HUMAN  |
| 10107 | SQSPVHLR2000000                                      | sp Q9BXB4 OSB11_HUMAN |
| 10108 | CSLHASPASVR200002000000                              | sp Q96T58 MINT_HUMAN  |
| 10109 | GSISSTSEVHSPNVGLR200020000000000000                  | sp Q9P206 K1522_HUMAN |
| 10110 | TPTSPLK20000                                         | sp Q8WWQ0 PHIP_HUMAN  |
| 10111 | AKSPTSPSPPRNSDQEGGK2.02000200002E+19                 | sp 060264 SMCA5_HUMAN |
| 10112 | MSLPDVLDLK200000000000                               | sp Q8IYB3 SRRM1_HUMAN |
| 10113 | SVSPAHR202000000                                     | sp Q09666 AHNK_HUMAN  |
| 10114 | GPTSSPCEEEDGEEEDRTSDLR2.2E+21                        | sp Q2KHR2 RF7_HUMAN   |
| 10115 | DSGRGDSVSDSGDALR2000000000                           | sp Q86VM9 ZCH18_HUMAN |
| 10116 | STAQQELDGKSPPTPVI VASHTANK2000000000000              | sp Q53EL6 PDCD4_HUMAN |
| 10117 | SSSPTS YWK200000000                                  | sp P35606 COPB2_HUMAN |
| 10118 | SPLSALAR200200000                                    | sp Q92614 MY18A_HUMAN |
| 10119 | EAARSPDKPGGSPSASR20000000020000                      | sp Q9BQG0 MBB1A_HUMAN |
| 10120 | TASETRSEGSEYEEIPKR2002000000000                      | sp Q9Y3T9 NOC2L_HUMAN |
| 10121 | LDLLGNLPGSK200                                       | sp P48634 PRC2A_HUMAN |
| 10122 | KEDSSDSENAEPDLDDNEDEEPAVEIEPEPEPQPVTPAPPPAK2.202E+41 | sp P46013 KI67_HUMAN  |
| 10123 | LQELESCGLGSTDDTDVR20000000                           | sp P49711 CTCF_HUMAN  |
| 10124 | SLENETLNKEEDCHSPTSKPPKPDQPLK200000000000             | sp Q14C86 GAPD1_HUMAN |
| 10125 | LSPSASPPR202020000                                   | sp P23588 IF4B_HUMAN  |
| 10126 | LQLERPVPETQADLQR20000000000                          | sp Q8IYB3 SRRM1_HUMAN |
|       |                                                      | sp Q9P206 K1522_HUMAN |

|       |                                                   |                       |
|-------|---------------------------------------------------|-----------------------|
| 10127 | VEGNFNPFA SPQK20000                               | sp Q9H6K1 CF106_HUMAN |
| 10128 | EEVVGDDSDGLR200000                                | sp P25490 TYY1_HUMAN  |
| 10129 | APSRDEGSLLLGSR200000000000                        | sp Q15345 LRC41_HUMAN |
| 10130 | MPCESPPEADTPTSTR1000020000000000000               | sp P46013 KI67_HUMAN  |
| 10131 | APGASPGNPLSPSLSDKDR2000000000                     | sp Q7Z5J4 RAI1_HUMAN  |
| 10132 | NLSPTPASPNGQPPPQVPVSPGPPK2000000000000000000      | sp Q9C0E8 LNP_HUMAN   |
| 10133 | SLPEEDVAEIQHAEFLIKPESK2E+23                       | sp 060832 DKC1_HUMAN  |
| 10134 | SLAPDRSDDEHDPLDNTSRPR2000000000000000             | sp Q92614 MY18A_HUMAN |
| 10135 | SSSQRSPPGPNHTSNSSNASNATVVPQNSSAR2. 202E+20        | sp Q9BTA9 WAC_HUMAN   |
| 10136 | SPSAMQQDGLDR201000000000                          | sp 060343 TBCD4_HUMAN |
| 10137 | RYSGSDSDSISEGKRPK2000202020000000                 | sp 014646 CHD1_HUMAN  |
| 10138 | SLPTTVPESPNYR20002000000000                       | sp Q6PKG0 LARP1_HUMAN |
| 10139 | SSLGQSASETEEDTVSVSK2000000000000000000            | sp Q13435 SF3B2_HUMAN |
| 10140 | DNSPEPNDPEEPQEVSTPSDKK2. 00000000000002E+21       | sp Q9HB58 SP110_HUMAN |
| 10141 | LEPTAPALSPR2000                                   | sp Q96IF1 AJUBA_HUMAN |
| 10142 | KVVVSPTKK200000                                   | sp P19338 NUCL_HUMAN  |
| 10143 | LGGPEGPGSPLLAT2000000                             | sp Q9C086 IN80B_HUMAN |
| 10144 | DPAQPMSPGEATQSGARPADR12000000000000000            | sp Q9BQG0 MBB1A_HUMAN |
| 10145 | VAASPKSPTAALNESLVECPK2002000000000000000          | sp Q53E24 CEP55_HUMAN |
| 10146 | VVEAVNSDSDSEFGIPK2020000000                       | sp Q02880 TOP2B_HUMAN |
| 10147 | GSPSPEKPDVEK2000000000                            | sp Q93074 MED12_HUMAN |
| 10148 | GNEPGSDRSPSPSKNDSFFTPDSNHNSLSQSTTGHLSPQK2. 02E+33 | sp Q5VT52 RPRD2_HUMAN |
| 10149 | VSALEEDMDDVESSEEEEEDEKLER2. 000001000002E+25      | sp Q8NAV1 PR38A_HUMAN |
| 10150 | KDSSSVVEWTQAPK2000000000000                       | sp Q8TC07 TBC15_HUMAN |
| 10151 | NSSTPGLQVPVSPVPIQNK200000000                      | sp Q03164 KMT2A_HUMAN |
| 10152 | SSPGAGPSDHHASAR2000000000000000                   | sp Q9Y2K7 KDM2A_HUMAN |
| 10153 | KKSSSEAKPTSLGLAGGHK22000000000                    | sp Q96RK0 CIC_HUMAN   |
| 10154 | YSPTSPTYSPPTPK20030000000                         | sp P24928 RPB1_HUMAN  |
| 10155 | SLESSVIMDR2002001000                              | sp Q9H2Y7 ZN106_HUMAN |
| 10156 | SRTPPVTR2000000                                   | sp Q9UQ35 SRRM2_HUMAN |
| 10157 | KSVIEGVDESDISDDEPSVYSA20020000000000              | sp Q9NUN5 LMBD1_HUMAN |
| 10158 | SELSPR20202000                                    | sp Q99590 SCAFB_HUMAN |
| 10159 | QEEKPKDPVLKSPSPVLR20200000                        | sp 043432 IF4G3_HUMAN |
| 10160 | VSDSESEGPQKGPASDSETEDASR2. 0202000000002E+23      | sp Q96ST2 IWS1_HUMAN  |
| 10161 | IDFSSIAVPGTSSPR20000                              | sp Q5TDH0 DDI2_HUMAN  |
| 10162 | HSPEEDFRQSPQEHFR2000000020000000                  | sp Q8IXT5 RB12B_HUMAN |
| 10163 | AAKPGPAEAPSPTASPGDASPPATAPYDPR2020000000000000000 | sp Q9UPT8 ZC3H4_HUMAN |
| 10164 | ISPPSYAR20020000                                  | sp Q8N2M8 CLASR_HUMAN |
| 10165 | RHSDENDGGQPHKR20000000000000                      | sp Q09161 NCBP1_HUMAN |
| 10166 | EKGPTTGEGALDLSDVHSPPKSPEGK2E+22                   | sp 095684 FR10P_HUMAN |
| 10167 | TSGSDDPGICSNSTDSTQAQVLLGK20000000000000           | sp Q8NDI1 EHBP1_HUMAN |
| 10168 | SAGGSSPEGGEDSDREDGNYCPPVK2. 00002E+25             | sp Q9H6Z4 RANB3_HUMAN |
| 10169 | DGSGTPSRHSLSGSSPGMK200000000202200000             | sp Q9UQ35 SRRM2_HUMAN |
| 10170 | SPSPAPAPAPAAAAGPPTR2000000000000000000            | sp Q9H7N4 SFR19_HUMAN |
| 10171 | EGPDLDRPGSDR2000                                  | sp Q7Z4V5 HDGR2_HUMAN |
| 10172 | DLLESSDSDEKVPLAK20202000000000                    | sp P54198 HIRA_HUMAN  |
| 10173 | RSSPSARPPDVPGQPQAAK2. 002E+19                     | sp Q96JP5 ZFP91_HUMAN |
| 10174 | RASISEPSDTPPEPR20200002000000                     | sp Q8N1F8 S11IP_HUMAN |
| 10175 | DSSDSADGRATPSENLPSSAR20000000000000               | sp Q8N684 CPSF7_HUMAN |
| 10176 | KRTISQSSSLK2020000000                             | sp Q9UHB7 AFF4_HUMAN  |
| 10177 | SRSPLGFYVHLK2020000000000                         | sp Q8IXT5 RB12B_HUMAN |
| 10178 | RSQSIEQESQEK202000000000                          | sp Q5VTL8 PR38B_HUMAN |
| 10179 | LRLSPSPTSQR20000                                  | sp P02545 LMNA_HUMAN  |

|       |                                                                               |                       |
|-------|-------------------------------------------------------------------------------|-----------------------|
| 10180 | SSAYGDATAEGHPAGPGSVSSSTGAISTTTGHQEGDGSEGEGETEGDVHTSN<br>R20000000000000000000 | sp Q5T4S7 UBR4_HUMAN  |
| 10181 | SPHSPSPATPPSQSSSCSDAPMLSTVHSAK2.02E+28                                        | sp Q9NYF8 BCLF1_HUMAN |
| 10182 | SLSSGESGPGSPTHSHSLSPR2.2E+19                                                  | sp Q6P0Q8 MAST2_HUMAN |
| 10183 | HSTASHSSHTSGIEADTKPR2.20202E+20                                               | sp Q96NE9 FRMD6_HUMAN |
| 10184 | SEEEQSSSVKDETNVK220000000000                                                  | sp P07910 HNRPC_HUMAN |
| 10185 | RPAEATSSPTSPERPR220020000000                                                  | sp Q9BU76 MMTA2_HUMAN |
| 10186 | FGSTGSTPPVSPTPSER2022000202000000                                             | sp Q969V6 MKL1_HUMAN  |
| 10187 | SQSSSQDNPLAPGYLPPHYK2.22E+19                                                  | sp Q6ZRV2 FA83H_HUMAN |
| 10188 | LGSTGSPNSEAESVPENVPKPLLPK2.000000002E+25                                      | sp Q8IZ21 PHAR4_HUMAN |
| 10189 | GSGDISSDSIDHSPAK20200020000                                                   | sp Q9H5I1 SUV92_HUMAN |
| 10190 | TPLYLQPDAYGSLDR2000000000000000                                               | sp Q8WUF5 IASPP_HUMAN |
| 10191 | GSASPHKSSPQLVATPSQHHQQQQQIK2.00002E+26                                        | sp Q9P0U4 CXXC1_HUMAN |
| 10192 | MQSLQLDCVAVPSSR200                                                            | sp Q13546 RIPK1_HUMAN |
| 10193 | ASGSLSPILAPLSPGAEISPHDLSLESCR2.00000002E+25                                   | sp Q9NRF2 SH2B1_HUMAN |
| 10194 | KKSSSDPGIPGGPQAIPATNSPDHSDHTLSVSSDSGHSTASAR2.2E+41                            | sp Q68CZ2 TENS3_HUMAN |
| 10195 | SQDADSPGSSGAPENLTFK2000200000000000                                           | sp P55196 AFAD_HUMAN  |
| 10196 | SESQESLVTSPSKPK20000000                                                       | sp Q76L83 ASXL2_HUMAN |
| 10197 | AVQTLAQSPTSDKPSQRPESTNCSPTR2E+26                                              | sp Q9NR48 ASH1L_HUMAN |
| 10198 | GLNSQSSDDHLNK200200000000                                                     | sp A8CG34 P121C_HUMAN |
| 10199 | AASAATAAPTATPAAQESGTPK2E+21                                                   | sp Q96HA1 P121A_HUMAN |
| 10200 | AASAATAAPTATPAAQESGTPK2E+21                                                   | sp 000116 ADAS_HUMAN  |
| 10200 | SAYQEYDSDSVPEELK2000000000                                                    | sp Q96JG6 CC132_HUMAN |
| 10201 | SPPGSPSTPTEQR20002000000000                                                   | sp 075864 PPR37_HUMAN |
| 10202 | SGAAMPSSPK22000                                                               | sp Q86SQ0 PHLB2_HUMAN |
| 10203 | RLSAPLPSSCGDPEK20000000000000                                                 | sp Q96EP0 RNF31_HUMAN |
| 10204 | AGLSPERPPKTSPPGSPR22002000                                                    | sp Q9H6F5 CCD86_HUMAN |
| 10205 | EDALDDSVSSSVHASPLASSPVR202000000000020000                                     | sp P49792 RBP2_HUMAN  |
| 10206 | RGSVSSVSPKPPSSF200000000020000                                                | sp Q7Z3J3 RGPD4_HUMAN |
| 10207 | HLDRSPESDRPR2000000000                                                        | sp 014715 RGPD8_HUMAN |
| 10208 | RPDDVPLSLSPSKR200000                                                          | sp Q99666 RGPD5_HUMAN |
| 10209 | ERSMSENAVR2000000000                                                          | sp A6NKT7 RGPD3_HUMAN |
| 10210 | ESAAPASPAPSPAPSPPTAPPQK2.000000000002E+22                                     | sp Q9NZJ0 DTL_HUMAN   |
| 10211 | ALEAASLSQHPPSLCISDSEEEEEER2.0000002E+21                                       | sp Q96T37 RBM15_HUMAN |
| 10212 | ATDIPASASPPPVAGVPFFK2E+19                                                     | sp Q9UFC0 LRWD1_HUMAN |
| 10213 | VQMTSPSSTGSPMFK2000000200000                                                  | sp Q9GZY8 MFF_HUMAN   |
| 10214 | SPSHSSNRPFTPPTSTGGSK2.02E+19                                                  | sp Q3KQU3 MA7D1_HUMAN |
| 10215 | TQTPVSPAPQPTTEER200000200000000000                                            | sp 043159 RRP8_HUMAN  |
| 10216 | LEPVYSPPGSPPGDPR30000200000000                                                | sp Q8N1G0 ZN687_HUMAN |
| 10217 | TAVQYIESSDSEIETSELPPK200000000000                                             | sp P49790 NU153_HUMAN |
| 10218 | SSQSPATAVPASDSPPTK220000000000000000                                          | sp Q15648 MED1_HUMAN  |
| 10219 | NPWSDDESKSESLEETEPVVIPR202020000200000000                                     | sp Q14247 SRC8_HUMAN  |
| 10220 | WDESNSERDVTK202020000000                                                      | sp 075676 KS6A4_HUMAN |
| 10221 | HHHSDSDSNSPCK2020200000                                                       | sp Q14527 HLTF_HUMAN  |
| 10222 | SEDDSAKFDSEEDSASVFSFGLK20000000000000                                         | sp Q3KQU3 MA7D1_HUMAN |
| 10223 | LNSSNSASPHR202000000                                                          | sp Q02880 TOP2B_HUMAN |
| 10224 | NEETSEESQEDEKQDTWEQQMR2.2002E+20                                              | sp P30414 NKTR_HUMAN  |
| 10225 | SQSSGSSATHPIVPGAR2000000000000000                                             | sp Q9BU76 MMTA2_HUMAN |
| 10226 | GQSQTSPDHRSDTSSPEVR200000000022200000                                         | sp Q02880 TOP2B_HUMAN |
| 10227 | SRSPTPPSSAGLGSNSAPPIDSR2.02E+22                                               | sp P49792 RBP2_HUMAN  |
|       |                                                                               | sp P16383 GCFC2_HUMAN |
|       |                                                                               | sp Q9Y4H2 IRS2_HUMAN  |
|       |                                                                               | sp Q9UQ35 SRRM2_HUMAN |
|       |                                                                               | sp Q8IWX8 CHERP_HUMAN |

|       |                                                    |                       |
|-------|----------------------------------------------------|-----------------------|
| 10228 | EIKLSDDFDSPVKGPLCK200002000000000                  | sp Q96T23 RSF1_HUMAN  |
| 10229 | SGASEANLIVAK200000000000000                        | sp P46013 KI67_HUMAN  |
| 10230 | SILVSPTGPSR20000000                                | sp Q14684 RRP1B_HUMAN |
| 10231 | QQSSSSKGDSPKPR220000200000000                      | sp Q5VWQ8 DAB2P_HUMAN |
| 10232 | TSAQHALTSVSRGSSLK2020020000                        | sp P61073 CXCR4_HUMAN |
| 10233 | REPGSGTESDTSPDFHNQENEPSQEDPEDLDGSVQGVKPK2. 02E+33  | sp Q9HAF1 EAF6_HUMAN  |
| 10234 | RRSPSPYYSR2000000                                  | sp P62995 TRA2B_HUMAN |
| 10235 | QPPSEGPSNYDSYK20000000                             | sp Q13595 TRA2A_HUMAN |
| 10236 | SYSPDGKESPSDKK202000000000000                      | sp Q8TEW0 PARD3_HUMAN |
| 10237 | SQSESSDEVTELDLSHGKK2002000000000000000             | sp P43243 MATR3_HUMAN |
| 10238 | TSADAQEPASPVVSPQQSPPTSPHTWR200020020000000         | sp Q86YS7 C2CD5_HUMAN |
| 10239 | RPSSSEIITEGK200000000                              | sp Q96D71 REPS1_HUMAN |
| 10240 | DEVSHLQSGSHLANNSDPESTFR200000000                   | sp Q9BQF6 SENP7_HUMAN |
| 10241 | IQSSLSVNSDISK200000200                             | sp O15027 SC16A_HUMAN |
| 10242 | TSAQHALTSVSRGSSLK200000000000022000                | sp Q9P1T7 MDFIC_HUMAN |
| 10243 | SSLAETLDSTGSLDQR20002000202000000                  | sp P61073 CXCR4_HUMAN |
| 10244 | TNSMGSATGPLPGTK210000000000000                     | sp Q9UGH3 S23A2_HUMAN |
| 10245 | STDFVFIPPEGK2000000000000                          | sp O15014 ZN609_HUMAN |
| 10246 | SRTPSASNDQQE2000000000                             | sp Q5UIP0 RIF1_HUMAN  |
| 10247 | GLNPDGTPALSTLGGFSPASKPSSPR2. 0002E+20              | sp O43765 SGTA_HUMAN  |
| 10248 | ESPHFYR2000000                                     | sp Q9UK58 CCNL1_HUMAN |
| 10249 | GLNPDGTPALSTLGGFSPASKPSSPR20020000                 | sp Q9HDC5 JPH1_HUMAN  |
| 10250 | YSPTSPTYSPTPK300000200000000                       | sp Q9UK58 CCNL1_HUMAN |
| 10251 | SNPESIAETPPAR200000                                | sp P24928 RPB1_HUMAN  |
| 10252 | ANEAGGQVGPEAPRPPEMSPEMR200000                      | sp Q9Y4H2 IRS2_HUMAN  |
| 10253 | TPNNVSTPAPSPDASQLASSLSSQK20000000000000000         | sp Q8N3D4 EH1L1_HUMAN |
| 10254 | NQSPTAEKPASSSLPSSPPPQLLTR20000000000               | sp Q8WWI1 LM07_HUMAN  |
| 10255 | IESDVQEPTPEDDLDIMLGNK2E+20                         | sp Q99567 NUP88_HUMAN |
| 10256 | TTLSEPLSSPAASPK20000000020002000                   | sp P20042 IF2B_HUMAN  |
| 10257 | TAANKSPCETISSPSSTLESK2020000000000                 | sp Q8IVL1 NAV2_HUMAN  |
| 10258 | DGTAPPPQSPGSPGTGQDEEWSDEESPR20002000               | sp Q9COD5 TANC1_HUMAN |
| 10259 | TKSDESGEKNGDEDCQR2002000000000000000               | sp Q9UKS6 PACN3_HUMAN |
| 10260 | SQKSPTGTPAR2020000020000                           | sp Q6PKG0 LARP1_HUMAN |
| 10261 | STTPPPAEPVSLPQEPK2000000000000000000               | sp Q13595 TRA2A_HUMAN |
| 10262 | SPQPVSPPRQSQPPHSSPSPR2. 000002E+22                 | sp Q9UN86 G3BP2_HUMAN |
| 10263 | DTHEDHDTSTENTDESNHDPQFEPVSLPEQEIK2E+25             | sp Q09472 EP300_HUMAN |
| 10264 | SSPASSPELPWRPR200200000000000                      | sp P43487 RANG_HUMAN  |
| 10265 | STPLASPSPPGR2000200020000                          | sp Q9NYF3 FA53C_HUMAN |
| 10266 | ELSPRPR2000000                                     | sp Q8WYP5 ELYS_HUMAN  |
| 10267 | EGSVLDILKSPGFASPK200000000                         | sp Q99956 DUS9_HUMAN  |
| 10268 | GPTPPAMGPR200000000                                | sp P49790 NU153_HUMAN |
| 10269 | ASVSGPNSPSETR2000000                               | sp Q3KQU3 MA7D1_HUMAN |
| 10270 | KFELLTPPLSPSR200020000                             | sp O15344 TRI18_HUMAN |
| 10271 | STLTTLPPFGAEANSPGK20000                            | sp P04198 MYCN_HUMAN  |
| 10272 | SSIETKPDASQLPK2000000000000                        | sp P01106 MYC_HUMAN   |
| 10273 | TRDDGDEGLLTHSEEELEHSQDTDADDGALQ2. 020000002002E+21 | sp Q96GV9 CE030_HUMAN |
| 10274 | SYKVSTSGPR2000000                                  | sp Q3KR37 GRM1B_HUMAN |
| 10275 | ELASPVPELR200000                                   | sp Q9UKM9 RALY_HUMAN  |
| 10276 | RGSQDEEDSCSLHSQTLSEDER202000000000000              | sp P05787 K2C8_HUMAN  |
| 10277 | QSPGSTSPKPPHTLSR20000000000                        | sp Q5T4S7 UBR4_HUMAN  |
| 10278 | SPSPGLFR2000000                                    | sp Q9UPZ3 HPS5_HUMAN  |
| 10279 | VMHSSPSSSDGK2000000000000                          | sp O43159 RRP8_HUMAN  |
|       |                                                    | sp Q9HAW4 CLSPN_HUMAN |
|       |                                                    | sp Q969R2 OSBP2_HUMAN |

|       |                                                                |           |             |
|-------|----------------------------------------------------------------|-----------|-------------|
| 10280 | LSGEHSESSTPRPR2200000                                          | sp Q7Z3K3 | POGZ_HUMAN  |
| 10281 | EFGYDSPHDLSD200000200                                          | sp Q96CW6 | S7A60_HUMAN |
| 10282 | SRSSSVGSSSYPIPAVSR2.0222E+20                                   | sp Q15149 | PLEC_HUMAN  |
| 10283 | LLKPGEEPSEYTDDEEDTKDHNKQD320000000000000                       | sp O15173 | PGRC2_HUMAN |
| 10284 | NTSLPPLWSPEAER2000000                                          | sp P49790 | NU153_HUMAN |
| 10285 | YSPTSPTYSPVYTPSPK20000000000000000000                          | sp P24928 | RPB1_HUMAN  |
|       |                                                                | sp P30510 | 1C14_HUMAN  |
|       |                                                                | sp Q29865 | 1C18_HUMAN  |
|       |                                                                | sp P30504 | 1C04_HUMAN  |
|       |                                                                | sp Q9TNN7 | 1C05_HUMAN  |
|       |                                                                | sp P04222 | 1C03_HUMAN  |
| 10286 | GGSCSQAASSNSAQGSDESLIACK2.000000000002E+22                     | sp Q07000 | 1C15_HUMAN  |
|       |                                                                | sp Q29960 | 1C16_HUMAN  |
|       |                                                                | sp Q29963 | 1C06_HUMAN  |
|       |                                                                | sp P30505 | 1C08_HUMAN  |
|       |                                                                | sp P30508 | 1C12_HUMAN  |
|       |                                                                | sp Q95604 | 1C17_HUMAN  |
| 10287 | DGSGTPSRHSLSGSSPGMK200000000002200000                          | sp Q9UQ35 | SRRM2_HUMAN |
| 10288 | GSQAWVLS CSPSSQGQHK2000000000                                  | sp Q6PCD5 | RFWD3_HUMAN |
| 10289 | SRTPPSAPSQR2000020000000                                       | sp Q9UQ35 | SRRM2_HUMAN |
| 10290 | NEENTEPGAESSENADDPNKDTS ENADGQSDENKDDYTIPDEYR2000000000000000  | sp P43243 | MATR3_HUMAN |
| 10291 | SGAASMPSSPK2000                                                | sp Q86SQ0 | PHLB2_HUMAN |
| 10292 | WSPAYSFSSD SPLDSSPK200000000000                                | sp Q8NCG7 | DGLB_HUMAN  |
| 10293 | SLSRPSSLIEQEK2000000000000                                     | sp Q12802 | AKP13_HUMAN |
| 10294 | LSEEAECNPSTPSK20000                                            | sp O94804 | STK10_HUMAN |
| 10295 | SHMSGSPGPGSNTAPSTPVIGGSDKPGMEEK1.202E+30                       | sp A0FGR8 | ESYT2_HUMAN |
| 10296 | SPLYLVSR200000000                                              | sp Q8WYP5 | ELYS_HUMAN  |
| 10297 | DSSTSPGDYVLSVSENSOR2000000000000000                            | sp P46108 | CRK_HUMAN   |
| 10298 | RSPSLSSK20200000                                               | sp Q8IYB3 | SRRM1_HUMAN |
| 10299 | RTSPQVLGSILK200000000000                                       | sp Q7Z417 | NUFP2_HUMAN |
| 10300 | SPVGS GAPQAAAPAPAAHVAGNPGGDAAPAATG TAAAA SLATAAGSEDAEKK2000000 | sp P16989 | YBOX3_HUMAN |
| 10301 | EQGTESRSSTPLPTISSAENTR2.02E+20                                 | sp P42166 | LAP2A_HUMAN |
|       |                                                                | sp P42167 | LAP2B_HUMAN |
| 10302 | QRGSETDTDSEIHESASDKDSLK2.0202E+19                              | sp Q9Y520 | PRC2C_HUMAN |
| 10303 | TSQPPVPQGEAEEDSQGK20000                                        | sp Q12789 | TF3C1_HUMAN |
| 10304 | SLGGESSGTTVPVGSFHTEAAR2200000000000000000                      | sp O15085 | ARHGB_HUMAN |
| 10305 | ENLQPQSSGVQGVPI SPEPLQRPEMLK2000000000000                      | sp Q9H467 | CUED2_HUMAN |
| 10306 | LVPRPGSGSSGSSNSGSQPGSHPGSQSGSER2.0222E+27                      | sp O95819 | M4K4_HUMAN  |
| 10307 | SAPSSPTLDCEK2000200000000                                      | sp Q9GZM8 | NDEL1_HUMAN |
| 10308 | NSATCHSEDSLEID2002000000                                       | sp Q13371 | PHLP_HUMAN  |
| 10309 | SSSSQESLNRPFSSK2200000000000                                   | sp O75122 | CLAP2_HUMAN |
| 10310 | FSGGFGAR20000000                                               | sp O00571 | DDX3X_HUMAN |
|       |                                                                | sp O15523 | DDX3Y_HUMAN |
| 10311 | GSVSQPSTPSPKPTGIFQTSANSSFEPVK2.02E+23                          | sp O15027 | SC16A_HUMAN |
| 10312 | TSAQHALTSVSRGSSLK20022000                                      | sp P61073 | CXCR4_HUMAN |
| 10313 | SLSMDSQVPVYSPSIDLK2000000000000000000                          | sp Q9ULJ3 | ZBT21_HUMAN |
| 10314 | YLATSQPRPDSSGSH200200                                          | sp Q9C0H2 | TTYH3_HUMAN |
| 10315 | VDSPTVNTTLR2000000000                                          | sp Q9H0B6 | KLC2_HUMAN  |
| 10316 | INPDNYGMDLNSDDSTDDEAHPR3000002000200000000                     | sp Q9NQS7 | INCE_HUMAN  |
| 10317 | EDSGTFLGK2000000                                               | sp O75569 | PRKRA_HUMAN |
| 10318 | SPTLSQVHSPLVTSPANLK2.000000000002E+20                          | sp Q86UU0 | BCL9L_HUMAN |
| 10319 | NATLAWDSSHSSIQNSPK20002000                                     | sp O15440 | MRP5_HUMAN  |



|       |                                               |                       |
|-------|-----------------------------------------------|-----------------------|
| 10320 | TLNAETPKSSPLPAK22000000                       | sp Q7L2J0 MEPCE_HUMAN |
| 10321 | YTPTSPSYSPSSPEYTPSPK200000000000000000        | sp P24928 RPB1_HUMAN  |
| 10322 | RPAEATSSPTSPERPR200020000000                  | sp Q9BU76 MMTA2_HUMAN |
| 10323 | ELSNSPLRENSFGSPLEFR2000002002000000           | sp Q9UQ35 SRRM2_HUMAN |
| 10324 | TVSFAIEVVPAPPEPPPATPPQAK2.02E+22              | sp 015047 SET1A_HUMAN |
| 10325 | DKDSGSSSPLPK2200000                           | sp Q86VQ1 GLC11_HUMAN |
| 10326 | SPTVPSQNPISR2000000000                        | sp Q03164 KMT2A_HUMAN |
| 10327 | ASPITNDGEDEFVPSDGLDKDEYTFSPGK2000000000000000 | sp Q02880 TOP2B_HUMAN |
| 10328 | SATRPSPSERSSTGPEPPAPTPLLAER222000000000000000 | sp Q9UQ35 SRRM2_HUMAN |
| 10329 | RKDSEEEAASPEGK200000200000                    | sp Q9HB96 FANCE_HUMAN |
| 10330 | LSTTPSPTSSLHEDGVEDFR22020200000000000000      | sp 094842 TOX4_HUMAN  |
| 10331 | RLSESLHVVDENKNESK2000000000000000             | sp Q8NFC6 BD1L1_HUMAN |
| 10332 | GFGSEEGSR2000000                              | sp Q9Y5S9 RBM8A_HUMAN |
| 10333 | SPYAGLQLGAAK20000000000000                    | sp Q14134 TRI29_HUMAN |
| 10334 | DINTFVGPVEK200000                             | sp P46013 KI67_HUMAN  |
| 10335 | RSPALHGTPTAGCGSR2000000200                    | sp Q8IY92 SLX4_HUMAN  |
| 10336 | YSTPTYTGGQSESHVQSASEDTVTER200000000000        | sp Q7Z2T5 TRM1L_HUMAN |
| 10337 | STCGDSEVEEESPGKR220000000000000000            | sp 095696 BRD1_HUMAN  |
| 10338 | SSITEPEGPNQNIQK2000000000000000               | sp Q13625 ASPP2_HUMAN |
| 10339 | KGTTPPRSPEASPK200020002000                    | sp Q9HDC5 JPH1_HUMAN  |
| 10340 | SKSDATASISLSSNLK200000000000                  | sp Q9UBF8 PI4KB_HUMAN |
| 10341 | SPSKPPGPNR200000000                           | sp Q92766 RREB1_HUMAN |
| 10342 | VPEPPSSHSQSGPSSGSPER20000                     | sp Q8N137 CNTRB_HUMAN |
| 10343 | RIACDEEFSDESEDEGEGGR202000000000              | sp Q92769 HDAC2_HUMAN |
| 10344 | YPSSISSSPQK2000000                            | sp Q14157 UBP2L_HUMAN |
| 10345 | DGTAPPPQSPGSPGTGQDEEWSDEESPRK2E+27            | sp Q9UKS6 PACN3_HUMAN |
| 10346 | TLLPWSDESPEASGPPGPR2.0000000020002E+21        | sp Q9UMN6 KMT2B_HUMAN |
| 10347 | ASPDSSSCGERSPPPPPPPSDEALLHCVLEGK2.00002E+27   | sp Q9BRK4 LZTS2_HUMAN |
| 10348 | SGSALLQSQSSTEDPKDEPAELKPDSEDLSSQSSASK2E+35    | sp Q5VTR2 BRE1A_HUMAN |
| 10349 | STFAGSPER20000                                | sp Q2TBEO C19L2_HUMAN |
| 10350 | MNSQDSNTSVLEVVEKPLSER2E+20                    | sp Q9UJA3 MCM8_HUMAN  |
| 10351 | KTSASDVTNIYPGDAGK2000000000000000             | sp Q15042 RB3GP_HUMAN |
| 10352 | TPTSPLSPSSQK22002000000                       | sp Q5VT06 CE350_HUMAN |
| 10353 | GLQDGLRSSNSR2220000                           | sp P36915 GNL1_HUMAN  |
| 10354 | SSPSVKPAVDPAAAK2000000000000000               | sp Q6FI81 CPIN1_HUMAN |
| 10355 | EPLATLVDQSPESLK2000000                        | sp Q76L83 ASXL2_HUMAN |
| 10356 | TPTSSPASSPLVAK220020000000                    | sp Q14684 RRP1B_HUMAN |
| 10357 | ASPITNDGEDEFVPSDGLDKDEYTFSPGK20000            | sp Q02880 TOP2B_HUMAN |
| 10358 | SLSSGSNFCSEQK20000000000                      | sp 095243 MBD4_HUMAN  |
| 10359 | SSSLDGEHHDGYHR2000000000000000                | sp Q9C0J8 WDR33_HUMAN |
| 10360 | SRSGSSQELDVKPSASPQER2200000000000000          | sp Q9UQ35 SRRM2_HUMAN |
|       |                                               | sp Q9TNN7 1C05_HUMAN  |
|       |                                               | sp P04222 1C03_HUMAN  |
|       |                                               | sp Q07000 1C15_HUMAN  |
|       |                                               | sp Q29865 1C18_HUMAN  |
|       |                                               | sp Q29960 1C16_HUMAN  |
| 10361 | GGSCSQAASSNSAQGSDESLIACK2000000               | sp Q29963 1C06_HUMAN  |
|       |                                               | sp P30504 1C04_HUMAN  |
|       |                                               | sp P30505 1C08_HUMAN  |
|       |                                               | sp P30508 1C12_HUMAN  |
|       |                                               | sp P30510 1C14_HUMAN  |
|       |                                               | sp Q95604 1C17_HUMAN  |
| 10362 | GPTTGEGALDLSVDHSPPKSPEGK2.000000000002E+21    | sp 095684 FR10P_HUMAN |
| 10363 | YSPTSPTYSPVYTPSPK20030000000                  | sp P24928 RPB1_HUMAN  |

|       |                                                 |                       |
|-------|-------------------------------------------------|-----------------------|
| 10364 | HDYDDSSSEEQSAEDSYEASPGSETQR2300000000000        | sp P98175 RBM10_HUMAN |
| 10365 | YTPTSPSYSPSSPEYTPK2.0000000000003E+20           | sp P24928 RPB1_HUMAN  |
| 10366 | ASSSGPRSPLDQR2000000                            | sp O14646 CHD1_HUMAN  |
| 10367 | SVSASSGPCSPAAPHPPPPR2.0002E+21                  | sp Q86UY5 FA83A_HUMAN |
| 10368 | GLNPDGTPALSTLGGFSPASKPSSPR20020020000           | sp Q9UK58 CCNL1_HUMAN |
| 10369 | VDSSTNSSPSPQQSESLSPAHTSDFR2.02E+22              | sp Q9BQE9 BCL7B_HUMAN |
| 10370 | IPESETESTASAPNSPR2000002000                     | sp Q07889 SOS1_HUMAN  |
| 10371 | SPLQSAESSPTAGK20022000000                       | sp Q8IWB9 TEX2_HUMAN  |
| 10372 | ENFSPER20000                                    | sp Q7Z6E9 RBBP6_HUMAN |
| 10373 | VGDSTPVSEKPVSAAVDANASESP2E+21                   | sp Q9H8Y8 GORS2_HUMAN |
| 10374 | AELKLSR200                                      | sp Q92625 ANS1A_HUMAN |
| 10375 | SNCLGTDEDSQDSSDGIPSPR2.000000000002E+22         | sp Q92993 KAT5_HUMAN  |
| 10376 | ASASRPQPAPADGADPPPAEPEARPDGEGSPGK20000          | sp P11274 BCR_HUMAN   |
| 10377 | RPAEATSSPTSPERPR200002000000                    | sp Q9BU76 MMTA2_HUMAN |
| 10378 | SFSASQSTDR200000000                             | sp Q9ULJ3 ZBT21_HUMAN |
| 10379 | LFGQEELDPDSLSDASGSDGGRGPEPGVEPQDSR2.0200202E+24 | sp Q9Y4F5 C170B_HUMAN |
| 10380 | DFDSSSEDEKHSK2200000000                         | sp P46100 ATRX_HUMAN  |
| 10381 | SFSISPSRR2000200000                             | sp P18583 SON_HUMAN   |
| 10382 | GGTSHPSVPVPPASSPSPLSGSALCGGK2200000000000000    | sp P49848 TAF6_HUMAN  |
| 10383 | AASPSQSVR200002000                              | sp Q8IYB3 SRRM1_HUMAN |
| 10384 | YQQITPVNQRS200                                  | sp Q9NYL2 MLTK_HUMAN  |
| 10385 | SWSYNGYSDLSTAR23000020000000                    | sp P30414 NKTR_HUMAN  |
| 10386 | DDGDEGLLTHSEEELEHSQTDADDGALQ2.020000002E+21     | sp Q9UKM9 RALY_HUMAN  |
| 10387 | LSPLTGQACR2000000000                            | sp Q9UKA4 AKA11_HUMAN |
| 10388 | SEESDTSERQDDSYIEPEPVEPLK2.00002022E+26          | sp Q9BZF1 OSBL8_HUMAN |
| 10389 | NTVDLVTCHIHSDDDEIDFK20200000000                 | sp Q5H9R7 PP6R3_HUMAN |
| 10390 | NSNFSVQHPSSTSPTEK200000000                      | sp Q03468 ERCC6_HUMAN |
| 10391 | TSPSGKATLK200000000000                          | sp P27695 APEX1_HUMAN |
| 10392 | KASSPSPLTIGTPESQR202000000000000                | sp Q9NPI6 DCP1A_HUMAN |
| 10393 | SRSPLSPR202002000                               | sp Q9NXX6 NSE4A_HUMAN |
| 10394 | GPTSSPCEEGDEGEEDRTSDLR2E+20                     | sp Q86VM9 ZCH18_HUMAN |
| 10395 | SESPPLSDPK2000000000                            | sp Q15059 BRD3_HUMAN  |
| 10396 | SSSSQESLNRPFSSK220000000000000                  | sp O75122 CLAP2_HUMAN |
| 10397 | KCVTMSSAVVQLYAADR10200000000000                 | sp O00401 WASL_HUMAN  |
| 10398 | SLSPGVSRSSTSYTETK2020002000000000000            | sp Q9UKV3 ACINU_HUMAN |
| 10399 | SYLEGSSDNQLK2000002000000                       | sp Q9UHI6 DDX20_HUMAN |
| 10400 | SGYSSPGSPGTPGSR200200000000                     | sp TAU_HUMAN          |
| 10401 | KAEAAAAPTVPAPGPAQPGHVSPTPATTSPGK200000          | sp P10636 TAU_HUMAN   |
| 10402 | STAQQELDGKASPTPVIVASHTANK2E+25                  | sp Q9Y6R0 NUMBL_HUMAN |
| 10403 | SFSISPSRR2020200000                             | sp P35606 COPB2_HUMAN |
| 10404 | VGDTEKPEPERSPPNR20000000000000                  | sp P18583 SON_HUMAN   |
| 10405 | MSDSESEELPKPVSDSESEPPR2.0202000000002E+23       | sp Q9NZ63 CI078_HUMAN |
| 10406 | DSHSSEDEASSQTDLSQTISKK2.02E+22                  | sp Q96ST2 IWS1_HUMAN  |
| 10407 | RESGGRPIKPPK20000000000                         | sp Q5JTV8 TOIP1_HUMAN |
| 10408 | IEEVLSPEGSPSKSPK20000                           | sp Q15059 BRD3_HUMAN  |
| 10409 | DEVVSPLPSALQGPSGLSAPPAASVISAPSSSSR2000000000000 | sp Q9UEY8 ADDG_HUMAN  |
| 10410 | SPVVSAGDTSR200020000000                         | sp Q7L2J0 MEPCE_HUMAN |
| 10411 | HKSDSPESDAER20000200000                         | sp TAU_HUMAN          |
| 10412 | ELLSPLSEPDDRYPLIVK2002000000000000              | sp P10636 TAU_HUMAN   |
| 10413 | RASSPFRR2200000                                 | sp O75400 PR40A_HUMAN |
| 10414 | DHNSSEDEDEDKYADDIDMPGQNFDSK2.0000000000001E+23  | sp Q9UHB7 AFF4_HUMAN  |
| 10415 | HIKEEPLSEEPCTSTAIASPEKK200000200000             | sp Q14978 NOLC1_HUMAN |
|       |                                                 | sp O95391 SLU7_HUMAN  |
|       |                                                 | sp Q9Y2X3 NOP58_HUMAN |

|       |                                                             |                       |
|-------|-------------------------------------------------------------|-----------------------|
| 10416 | LMQLMESEQK20000                                             | sp Q86UP2 KTN1_HUMAN  |
| 10417 | SSKSFSLDEPPLFIPDNIATIR2.02E+19                              | sp Q92576 PHF3_HUMAN  |
|       |                                                             | sp P01891 1A68_HUMAN  |
|       |                                                             | sp P10316 1A69_HUMAN  |
| 10418 | KGGSYSQAASSDSAQGSVDVSLTACK20002000000000                    | sp P05534 1A24_HUMAN  |
|       |                                                             | sp P30447 1A23_HUMAN  |
|       |                                                             | sp Q09160 1A80_HUMAN  |
|       |                                                             | sp P01892 1A02_HUMAN  |
| 10419 | RGSLEMSSDGEPLSR200002000000000                              | sp Q6ZN18 AEBP2_HUMAN |
| 10420 | TVTPASSAKTSPAK200020000                                     | sp Q16555 DPYL2_HUMAN |
| 10421 | RPESPSEISPIKGSVR200002000000000                             | sp Q7Z5K2 WAPL_HUMAN  |
| 10422 | APVSGSRSPDR2020000                                          | sp Q8N5F7 NKAP_HUMAN  |
| 10423 | SDSDSSTLPR20000000000                                       | sp Q9ULE0 WWC3_HUMAN  |
| 10424 | KPEKPLFSSASPQDSSPR200020000                                 | sp O00712 NFIB_HUMAN  |
| 10425 | IQPQPPDEDGDHSDKEDEQPQVVVLK200000000000000                   | sp Q96AT1 K1143_HUMAN |
| 10426 | HNGSLSPGLEAR20000000                                        | sp Q9C0C2 TB182_HUMAN |
| 10427 | LIDSSGSASVLTHSSSGNSLK2000000                                | sp Q96SU4 OSBL9_HUMAN |
| 10428 | YGGSHYSSSGYSNSR20000000                                     | sp Q9BRL6 SRSF8_HUMAN |
| 10429 | LSPQQAFPR200000000                                          | sp Q9BUH8 BEGIN_HUMAN |
| 10430 | AYSPTCSPTLGFK200000200000                                   | sp Q5TGY3 AHDC1_HUMAN |
| 10431 | RHSSVSDSQCEPPSVGTEYSQGASPPQHQLK2.02E+30                     | sp P39880 CUX1_HUMAN  |
| 10432 | TPSPKEEDEEPESPPEKK2000000                                   | sp Q9H1E3 NUCKS_HUMAN |
| 10433 | WTKPSSFSDSER220000000                                       | sp Q8NC56 LEMD2_HUMAN |
| 10434 | RSQSSSQGDNPLAPGYLPPHYK2.0022E+21                            | sp Q6ZRV2 FA83H_HUMAN |
| 10435 | KGAANASGSSPDAPAK20000000                                    | sp O75962 TRIO_HUMAN  |
| 10436 | IAVHHNSVEDVPEEK2000000000                                   | sp Q9UKY1 ZHX1_HUMAN  |
| 10437 | RNSSDSAIDNPKPNK2020000000000                                | sp P46100 ATRX_HUMAN  |
| 10438 | SMGTGDTPGLEVPSSPLRK1000000000000200000                      | sp Q86WB0 NIPA_HUMAN  |
| 10439 | VQNHLPASGPTQPPVVSSTNEGSPSPPEPTGK200000000                   | sp O43294 TGFI1_HUMAN |
| 10440 | HSSISPVRPLNSSLGAELSR2.002E+20                               | sp Q9NYV4 CDK12_HUMAN |
| 10441 | EKSATRPPSPER202000020000                                    | sp Q9UQ35 SRRM2_HUMAN |
| 10442 | EPDATPPSPR2002000                                           | sp P28715 ERCC5_HUMAN |
| 10443 | SSGHSSSELSPDAVEK20000000000                                 | sp Q9UQ35 SRRM2_HUMAN |
| 10444 | IQALGLHLPDPPELESEDEDEEGATALNNHSSIPMDPEHVELVK200000000000000 | sp Q16626 MEA1_HUMAN  |
| 10445 | STSHTSDFNPNSGSDQR200000000000000000                         | sp Q99700 ATX2_HUMAN  |
| 10446 | SSSPGKPAVSSLNSSHSR22000000000000000000                      | sp Q9UHB7 AFF4_HUMAN  |
| 10447 | RQSLPASPR20002000                                           | sp Q3KQU3 MA7D1_HUMAN |
| 10448 | SLSSSSIGSNSTYLTSK2002000000000                              | sp Q86SQ4 GP126_HUMAN |
| 10449 | QSQIQNQGEDSGSDPEDTY2020000000                               | sp P18858 DNLI1_HUMAN |
| 10450 | SPTVEPSTLPR2000000000                                       | sp Q9BY89 K1671_HUMAN |
| 10451 | SPSGPVKSPPLSPVGTTPVK20002000200000                          | sp Q9BVC5 ASHWN_HUMAN |
| 10452 | VSDSDSDSEDDINSVMK20202000000000100                          | sp Q6KC79 NIPBL_HUMAN |
| 10453 | REPGSGTESDTSPDFHNQENEPSQEDPEDLDGSVQGVKPK2.200000000002E+31  | sp Q9HAF1 EAF6_HUMAN  |
| 10454 | YTGEEDGAGGHSPAPPQTEECLR2E+22                                | sp O94762 RECQ5_HUMAN |
| 10455 | ESYDAPPTPSGAR2000000                                        | sp Q96S55 WRIP1_HUMAN |
| 10456 | EAGELPTSPLHLLSPGTTPR20000000002000                          | sp Q969R5 LMBL2_HUMAN |
| 10457 | STPLASPPSPGRSPQR20200020000                                 | sp Q8WYP5 ELYS_HUMAN  |
| 10458 | SPSPAPPPRR20200000000                                       | sp Q8IYB3 SRRM1_HUMAN |
| 10459 | KSRTLAQTV200                                                | sp Q9H1N7 S35B3_HUMAN |
| 10460 | KPSSETDIENWASK2000000000                                    | sp Q9C0H5 RHG39_HUMAN |
| 10461 | SVSPTFLNPSDENLK2000000000000000                             | sp Q9UKA4 AKA11_HUMAN |
| 10462 | SPSRPHPGGHPHSSPLAPHPISGDR220000000000000                    | sp Q8IY92 SLX4_HUMAN  |

|       |                                           |                       |
|-------|-------------------------------------------|-----------------------|
| 10463 | ASPLYASYK200000000                        | sp Q9BUH8 BEGIN_HUMAN |
| 10464 | SKPVLEPLTPPLGSPRR20000200000              | sp Q9H7P9 PKHG2_HUMAN |
| 10465 | SMVSPVPSPTGTISVPNSCPASPR2E+24             | sp P85037 FOXK1_HUMAN |
| 10466 | RHSSILKPPR220000000                       | sp Q8NG31 CASC5_HUMAN |
| 10467 | YLCEGTESPYQTGQLHPAIR2000002000000000      | sp Q15262 PTPRK_HUMAN |
| 10468 | LDYVPSSASR200                             | sp Q6ZRV2 FA83H_HUMAN |
| 10469 | NISSPSVESLPGGR200000000000                | sp Q92609 TBCD5_HUMAN |
| 10470 | SQSSEGVSSLSSSPNSLETQSQSLSR20200000000000  | sp O95155 UBE4B_HUMAN |
| 10471 | QGSITSPQANEQSVTPQR2000000000000000        | sp Q9UQ35 SRRM2_HUMAN |
| 10472 | SSPPSAGNSPSSLK20020002000000              | sp P57682 KLF3_HUMAN  |
| 10473 | VASPSQGQVGS SSPK20000000002000            | sp Q99569 PKP4_HUMAN  |
| 10474 | SQSSDTEQQSPTSGGK202000000000000           | sp P23588 IF4B_HUMAN  |
| 10475 | KYSEVDDSLPSGGKPSK200000000000             | sp Q05D32 CTSL2_HUMAN |
| 10476 | SRSESETSTMAAK200000000000                 | sp Q96B23 CRO25_HUMAN |
| 10477 | KPTSPVKPIQNTTEYR2000000000000000          | sp P25054 APC_HUMAN   |
| 10478 | SNMHFTSSSTGGLSSSQSSYSPSNR200000           | sp Q9P0J7 KCMF1_HUMAN |
| 10479 | MSPNETLFLESTNK100000000020000             | sp Q9HB90 RRAGC_HUMAN |
|       |                                           | sp Q9NQL2 RRAGD_HUMAN |
| 10480 | DELTESPK2000                              | sp Q8NC51 PAIRB_HUMAN |
| 10481 | EQPEMEDANSEKSINEENGEVSEDQSQNK2. 002E+20   | sp Q13523 PRP4B_HUMAN |
| 10482 | NLEQILNGGESPK2000                         | sp Q13033 STRN3_HUMAN |
| 10483 | RPQFSPTGDCQAEAAAAANGTGGEEDDGPAAELLEK2E+30 | sp Q7Z4Q2 HEAT3_HUMAN |
| 10484 | VGSAQSPDPDDLADAGLAQR2000000000000000      | sp Q8N3D4 EH1L1_HUMAN |
| 10485 | KKPAPLPSSSPGPPSQDSR200000000000           | sp Q8N3F8 MILK1_HUMAN |
| 10486 | RLSSQDVLR22000000                         | sp Q92794 KAT6A_HUMAN |
| 10487 | LLKPGEPESEYTDDEEDTKDHNK2002000000000000   | sp O15173 PGRC2_HUMAN |
| 10488 | STSHTSDFNPNSGSDQR2000000000000000         | sp Q99700 ATX2_HUMAN  |
| 10489 | GSSDGRGSDSEDLPHR22000000002000000         | sp Q9UPQ0 LIMC1_HUMAN |
| 10490 | EPTPSIASDISLPIATQELR20200000200000000000  | sp A0FGR8 ESYT2_HUMAN |
| 10491 | YSPTSPTYSPVYTPSPK20002000000              | sp P24928 RPB1_HUMAN  |
| 10492 | SKSDATASISLSSNLK2000000000000000          | sp Q9UBF8 PI4KB_HUMAN |
| 10493 | TPSASNDQEQE2000000000                     | sp O43765 SGTA_HUMAN  |
| 10494 | TPHYGSQTPLHDGSR20200000000                | sp O00267 SPT5H_HUMAN |
| 10495 | MAESPCSPSQPPSPSPDEL PANVK1. 0000020E+27   | sp Q14160 SCRIB_HUMAN |
|       |                                           | sp Q9NQL2 RRAGD_HUMAN |
| 10496 | MSPNETLFLESTNK2000                        | sp Q9HB90 RRAGC_HUMAN |
| 10497 | RPGTQGHLGPEKEEEEESDGEPEDSSTS2000          | sp Q8IYB7 DI3L2_HUMAN |
| 10498 | IRHDSSTSPRR20220000                       | sp Q9BRD0 BUD13_HUMAN |
| 10499 | SDSSQPMLLR200000000                       | sp P11532 DMD_HUMAN   |
| 10500 | RHSSDINHVLVTQGR200000000000               | sp Q5TON5 FBP1L_HUMAN |
| 10501 | SPAVATSTAAPPPSSPLPSK200                   | sp Q14157 UBP2L_HUMAN |
| 10502 | YDLDFKSPDDPSR20000000                     | sp P06733 ENOA_HUMAN  |
| 10503 | GSIDREDGSLQGPIGNQHIYQPVGKPDPAAPPK2E+32    | sp Q05397 FAK1_HUMAN  |
| 10504 | NSRDGDLPLSSLSCK2000000000000000           | sp P53602 MVD1_HUMAN  |
| 10505 | TSSPPSPQHSPALR2000200000000000            | sp Q13029 PRDM2_HUMAN |
| 10506 | TKSSSDLSPPRR220200200000                  | sp Q9BRD0 BUD13_HUMAN |
| 10507 | GSDYSWSYQTPSSPSSSSSR3000000000200000000   | sp Q765P7 MTSSL_HUMAN |
| 10508 | YEPSDKDRQSPPAK2000000                     | sp Q86VM9 ZCH18_HUMAN |
| 10509 | VMTIPYQPMPASSPVICAGGQDR2E+21              | sp Q15365 PCBP1_HUMAN |
| 10510 | STTAHSWQR2200000000                       | sp Q9UKJ3 GPTC8_HUMAN |
| 10511 | NEEDEGHSNSSPRHSEAATAQR2000200000000       | sp Q14103 HNRPD_HUMAN |
| 10512 | AVGMPSPVSPK2000                           | sp Q9UHB7 AFF4_HUMAN  |
| 10513 | DRRPSVDAPVTDVGLR2000000000000000          | sp Q9BUH8 BEGIN_HUMAN |
| 10514 | DPAGAYRSPSPQGTK202000000                  | sp Q9ULL5 PRR12_HUMAN |

|       |                                                            |                       |
|-------|------------------------------------------------------------|-----------------------|
| 10515 | HSPIAPSSPSPQVLAQK220200000000                              | sp Q9NQS7 INCE_HUMAN  |
| 10516 | LTNLSSNSDV2000                                             | sp Q13641 TPBG_HUMAN  |
| 10517 | RSSQPSPTAVPASDSPPTK2000020000000                           | sp Q3KQU3 MA7D1_HUMAN |
| 10518 | YISDGVESPPASPARPNHR2000200000000                           | sp Q8N4S9 MALD2_HUMAN |
| 10519 | GIAPASPMLGNASPNK2000000000000                              | sp P27448 MARK3_HUMAN |
| 10520 | RSSTVAPAQPDGAESEWTDVETR2E+21                               | sp Q02241 KIF23_HUMAN |
| 10521 | MSCFSRPSMSPTPLDR2000020000000                              | sp Q9UQ35 SRRM2_HUMAN |
| 10522 | LSSSSPGATVSPSSSDAEYDKLPDADLAR2.000000003E+21               | sp Q8NI08 NCOA7_HUMAN |
| 10523 | IGHHSTDDSSAYRSVDEVNYWDK3020000000000                       | sp P12694 ODBA_HUMAN  |
| 10524 | SVSASSGPCSPAAPHPPPPR2.0220002E+19                          | sp Q86UY5 FA83A_HUMAN |
| 10525 | VVSDADSDSDAVSDKSGKR2000020200020020000                     | sp Q96ST2 IWS1_HUMAN  |
| 10526 | HSPPMVR2000000                                             | sp Q060256 KPRB_HUMAN |
| 10527 | SRSGSSQELDVKPSASPQER2020000000000000000                    | sp Q9UQ35 SRRM2_HUMAN |
| 10528 | GSSPQNTTTPKPSVEGQQPAAAAACEPVDHAQSESILK2E+36                | sp Q27J81 INF2_HUMAN  |
| 10529 | NAIASDSEADSDTEVPK20200000200000                            | sp Q8WVC0 LEO1_HUMAN  |
| 10530 | NYAGEEEEEEGSGSSEGFDPATDR3.00000000022E+23                  | sp P16989 YBOX3_HUMAN |
| 10531 | IHLGSSPK20000                                              | sp Q9H410 DSN1_HUMAN  |
| 10532 | FSEMMNMGDEDVDLPEVDGADDDSDSDDEK1.1001E+30                   | sp Q15185 TEBP_HUMAN  |
| 10533 | MLAESDESGDEESVSQTDKTELQNTLR1.0002002E+27                   | sp P22059 OSBP1_HUMAN |
| 10534 | ESPTQISIGAFPSTK2000000000000                               | sp Q5VWN6 F208B_HUMAN |
| 10535 | AQTLPTSVVITITSESSPGKR200000000                             | sp Q01082 SPTB2_HUMAN |
| 10536 | MEQQYESSSDGTEKLPER10000002200000000000                     | sp P46100 ATRX_HUMAN  |
| 10537 | TSTPSPQPSKR2000200000000                                   | sp Q8IY18 SMC5_HUMAN  |
| 10538 | APASPGAGSDAQGPQFGWDHSLHK2E+21                              | sp Q5T6F0 DCA12_HUMAN |
| 10539 | SLSSPTVTLAPLEGAK20000000000000000                          | sp Q96PU5 NED4L_HUMAN |
| 10540 | SLENPTPPFTPK20000200000000                                 | sp O15085 ARHGB_HUMAN |
| 10541 | EPLENSAESSDTELPEK20002200000000                            | sp P78337 PITX1_HUMAN |
| 10542 | TSTPSPQPSKR2020000000                                      | sp Q8IY18 SMC5_HUMAN  |
| 10543 | SSSMSLGTAYTSGIPSSSR20000000000000000                       | sp A8CG34 P121C_HUMAN |
| 10544 | SKPAPSESAGYGIPLKDGDEKTDEEAEGPYSDNEMLTHK2000000002000000000 | sp Q6NUK4 REEP3_HUMAN |
| 10545 | MFVSSSGLPPSPVPSPR200000000002000                           | sp Q7Z309 F122B_HUMAN |
| 10546 | VAEPGAEATSSSTGEESGSEHPPAVPMHNR2.0000002E+20                | sp Q14684 RRP1B_HUMAN |
| 10547 | AADKSPESQNLIDGTK2000000000000                              | sp Q9HCE3 ZN532_HUMAN |
| 10548 | SYTSGPGSR20000000                                          | sp P05787 K2C8_HUMAN  |
| 10549 | SKEPHELVGSSPHR200000                                       | sp Q3T8J9 GON4L_HUMAN |
| 10550 | YTPTSPSYSPSSPEYTPTSPK20000000000                           | sp P24928 RPB1_HUMAN  |
| 10551 | HETWSGHV1SS20                                              | sp Q9Y2V2 CHSP1_HUMAN |
| 10552 | NLVSPAYCTQESREEIPGGEAR2E+19                                | sp Q9NUQ3 TXLNG_HUMAN |
| 10553 | LQDSSDPDTGSEEGSSRLSPPHSPR20002000                          | sp Q92974 ARHG2_HUMAN |
| 10554 | TSPCQSPITISEGPVPSLPIRPSR2020000000000000000                | sp O43426 SYNJ1_HUMAN |
| 10555 | ASSPAESSPEDSGYMR20000000000000000                          | sp Q9Y4H2 IRS2_HUMAN  |
| 10556 | LPSQTESVTSNR20000000000                                    | sp Q2M2I8 AAK1_HUMAN  |
| 10557 | APSRDEGSLLLGSR20000000                                     | sp Q15345 LRC41_HUMAN |
| 10558 | SPGAAGLTSR20000000000                                      | sp Q53T59 H1BP3_HUMAN |
| 10559 | RGGADTYSVPSVLSR32002000000                                 | sp P14543 NID1_HUMAN  |
| 10560 | EAYNDSSDEESSHHGPGVQCAHQ3.000000002E+22                     | sp O60884 DNJA2_HUMAN |
| 10561 | SPHDSKSPLDHR2000002000000                                  | sp O14647 CHD2_HUMAN  |
| 10562 | ISYIPDEEVSSPSPQR20000000                                   | sp Q9Y6M1 IF2B2_HUMAN |
| 10563 | GPPASSPAPAPK20000000                                       | sp Q15942 ZYG_HUMAN   |
| 10564 | FTSSQTQSPTPPKPPSPFELGLSSFPPLPGAAGNLK2.000002E+28           | sp Q92615 LAR4B_HUMAN |
| 10565 | TTSISPALAR2000000                                          | sp Q9UKE5 TNIK_HUMAN  |
| 10566 | MKSLEQDALR200000000                                        | sp Q14160 SCRIB_HUMAN |
| 10567 | MLPHAPGVQMQAIPEDAVHEDSGDEDGEDPDK200000000000               | sp Q92769 HDAC2_HUMAN |

|       |                                                       |                       |
|-------|-------------------------------------------------------|-----------------------|
| 10568 | SEVQQPVHPKPLSPDSRASSLSESSPPK20022020200000            | sp Q9UHB6 LIMA1_HUMAN |
| 10569 | RGSQSEDEDCSLHSQTLSEDER2.02000202E+20                  | sp Q9UPZ3 HPS5_HUMAN  |
| 10570 | SPSPYYSR2000000                                       | sp P62995 TRA2B_HUMAN |
| 10571 | RGNDPLTSSPGR2220000                                   | sp Q13595 TRA2A_HUMAN |
| 10572 | NSLPASPAHQLSSSPR220000                                | sp P49736 MCM2_HUMAN  |
| 10573 | VSSQFDPNKQTPSGK200000                                 | sp Q8TEK3 DOT1L_HUMAN |
| 10574 | DVDASPSPLSVQDLK2000000000                             | sp Q01780 EXOSX_HUMAN |
| 10575 | SRGSGHSQEQPAPQPSGGDPSPPQER2E+20                       | sp Q8IWZ8 SUGP1_HUMAN |
| 10576 | EKEPSYPMPVQETQAPESPGENSEQALQTLSPR2000                 | sp Q8WXE0 CSKI2_HUMAN |
| 10577 | CICPSLPYSPVSSPQSSPR3000020020000                      | sp Q7Z434 MAVS_HUMAN  |
| 10578 | GTGGSESSRASGLVGR2022002000000                         | sp Q96RR4 KKCC2_HUMAN |
| 10579 | SCVEEPEPEPEAAEGDGDKK2E+20                             | sp Q9UH99 SUN2_HUMAN  |
| 10580 | VASETHSEGSEYEELPK20000203000000                       | sp P51858 HDGF_HUMAN  |
| 10581 | WGREDKSDQSDDEK200200000                               | sp Q5JSZ5 PRC2B_HUMAN |
| 10582 | GEGDAPFSEPGTTSTQRPSSPETATK2000200000000               | sp Q8WVC0 LEO1_HUMAN  |
| 10583 | LSPAGLFTSAR2000000000000                              | sp Q9UQ35 SRRM2_HUMAN |
| 10584 | ASSPSASSSSSFR2000000000000                            | sp P42229 STA5A_HUMAN |
| 10585 | KTESSLPR2200000                                       | sp Q8IXZ2 ZC3H3_HUMAN |
| 10586 | STSPAGQHHSPISSR20000002002000                         | sp Q9Y278 HS3S2_HUMAN |
| 10587 | GSSDGRGSDSEDLPHR22000000200000000                     | sp Q5T200 ZC3HD_HUMAN |
| 10588 | DQPDGSSLSPAQSPSQSPPAASSLR2.2E+21                      | sp Q9UPQ0 LIMC1_HUMAN |
| 10589 | YISDGVCSPPASPARPNHR3.00000000002E+20                  | sp Q6WCQ1 MPRIP_HUMAN |
| 10590 | KFHSSDEEEHKK220200000000                              | sp Q8N4S9 MALD2_HUMAN |
| 10591 | TPPSTTVGSHSPPETPVLTR2000000000000                     | sp Q96ST2 IWS1_HUMAN  |
| 10592 | HLDVDLDRQSLSSIDKNPSEK220000000000                     | sp Q9ULU4 PKCB1_HUMAN |
| 10593 | GDLGPASPSQELGSPVPGDGAPALGK2000000000000000            | sp Q9Y6D5 BIG2_HUMAN  |
| 10594 | SRSRSTPEYR202023000000                                | sp Q4KMQ1 TPRN_HUMAN  |
| 10595 | DGDSYDPYDFSDTEEEMPQVHTPK300002000100002000            | sp Q13595 TRA2A_HUMAN |
| 10596 | LSLQHTQQNADGQEDGESERNNSSGDPGR20002022000000           | sp P25205 MCM3_HUMAN  |
| 10597 | HSASNLHALAHAPSPGSCSPK2E+21                            | sp 075052 CAPON_HUMAN |
| 10598 | DLVMGSSPQLK100200000                                  | sp P47974 TISD_HUMAN  |
| 10599 | DYGHSSSRDDYPSR2000000000                              | sp Q53LP3 SWAHC_HUMAN |
| 10600 | YGMGTSVER200000                                       | sp Q96E39 RMXL1_HUMAN |
| 10601 | TVSASSTGDLPK2000022000000                             | sp P38159 RBMX_HUMAN  |
| 10602 | VSHSPPPK20200000                                      | sp P08559 ODPA_HUMAN  |
| 10603 | TTPATGEQSPGAR20000000000                              | sp P78362 SRPK2_HUMAN |
| 10604 | ILIPSDIESSK20000200                                   | sp Q8IYB3 SRRM1_HUMAN |
| 10605 | NKLEGSDVDSELEDRVDGK2000200000000000                   | sp 000308 WWP2_HUMAN  |
| 10606 | DSSKGEDSAEETEAKPAVVAPVVEAVSTPSAAFPDATAEQPILTK2.02E+20 | sp P30414 NKTR_HUMAN  |
| 10607 | HDTDPSPPLR200000000                                   | sp Q92614 MY18A_HUMAN |
| 10608 | STPSPTPVESDPK20200000000000                           | sp Q12906 ILF3_HUMAN  |
| 10609 | RASAGPAPGPVVTAEGLHPSLPSPTGNSTPLGSSK2.0000000002E+33   | sp Q9BRD0 BUD13_HUMAN |
| 10610 | AEGEPQESPLK20000                                      | sp Q9NW07 ZN358_HUMAN |
| 10611 | EGGTASVATGPDSPSPVPLPPGKALPGADGTPFGCPPGR2E+37          | sp Q4KMP7 TB10B_HUMAN |
| 10612 | RSSLSSHSHQSQIYR2002202000000000                       | sp Q9NYF8 BCLF1_HUMAN |
| 10613 | GHTDTEGRPPSPPTSTPEK20000000000020000                  | sp Q6SPF0 SAMD1_HUMAN |
| 10614 | SAASPVVSSMPERASESSSEEKDDYEIFVK2.10000202E+22          | sp 015027 SC16A_HUMAN |
| 10615 | EQGTESRSSTPLPTISSAENTR2022000000000000000             | sp Q00613 HSF1_HUMAN  |
| 10616 | VGSLTPPSSPK2000002000                                 | sp P18583 SON_HUMAN   |
| 10617 | ESESEDSSDEPLIK2020022000000000                        | sp P42167 LAP2B_HUMAN |
|       |                                                       | sp P42166 LAP2A_HUMAN |
|       |                                                       | sp Q2M2I8 AAK1_HUMAN  |
|       |                                                       | sp P35659 DEK_HUMAN   |

|       |                                                |                          |
|-------|------------------------------------------------|--------------------------|
| 10618 | STSAPQMSPGSSDNQSSSPQPAQQK2200000000000000      | sp Q14157 UBP2L_HUMAN    |
| 10619 | SSPPGHYYQK20000000000                          | sp Q9NX40 OCAD1_HUMAN    |
| 10620 | STSPVTDPSIPIR200000000000                      | sp Q99607 ELF4_HUMAN     |
| 10621 | VDSPLPSDKAPTPPGK20000000000                    | sp Q12893 TM115_HUMAN    |
| 10622 | SPVPAQIAITVPK20000000000000                    | sp 043432 IF4G3_HUMAN    |
| 10623 | RSDSASSEPVGIYQGFKE2000000000000000             | sp Q05655 KPCD_HUMAN     |
| 10624 | SRTSPAPWK22000000                              | sp Q9UQ35 SRRM2_HUMAN    |
| 10625 | YSQDDDGSSSSGGSSVAGSQSTLFKDSPLR2E+30            | sp Q9UH99 SUN2_HUMAN     |
| 10626 | YSPTSPTYSPITPK220030000000                     | sp P24928 RPB1_HUMAN     |
| 10627 | RTASPPPPPK2020000000                           | sp Q8IYB3 SRRM1_HUMAN    |
| 10628 | RNSNSPPSPSSMNQR20000000210000                  | sp Q7Z5L9 I2BP2_HUMAN    |
| 10629 | SRSPQWR20200000                                | sp Q9UQ35 SRRM2_HUMAN    |
| 10630 | GRSPSPKPR20200000                              | sp Q9UQ35 SRRM2_HUMAN    |
| 10631 | ENIKPNETSPSFSK20000000                         | sp Q99700 ATX2_HUMAN     |
| 10632 | ESSPFLSPLEASR200020000000                      | sp Q9UP95 S12A4_HUMAN    |
| 10633 | TESVSDKEDKPLAPSGGTEGPEQPPPPCPSQTGSPPVGLIK2E+42 | sp Q8WWM7 ATX2L_HUMAN    |
| 10634 | ANASPKPLDLK2000000000                          | sp Q9Y618 NCOR2_HUMAN    |
| 10635 | YHGHSMSDPGVSYR2000                             | sp P08559 ODPA_HUMAN     |
| 10636 | SGSALLQSQSSTEDPK2000200000                     | sp P29803 ODPAT_HUMAN    |
| 10637 | KLSPTEPK2000000                                | sp Q5VTR2 BRE1A_HUMAN    |
| 10638 | HCAPSPDRSPELSSSR200000000                      | sp 014828 SCAM3_HUMAN    |
| 10639 | DGTAPPQSPGSPGTGQDEEWSDEESPRK2000000200000000   | sp Q96T37 RBM15_HUMAN    |
| 10640 | KPIDSLRDSRSLSYSPVER200023200000                | sp Q9UKS6 PACN3_HUMAN    |
| 10641 | SPISDNSGCDAPGNSNPSLSPSSAESEK2.00000002E+23     | sp Q9UQ35 SRRM2_HUMAN    |
| 10642 | FCDSPTSLEMR22000000                            | sp Q99590 SCAFB_HUMAN    |
| 10643 | GKLSAEENPDDSEVPSSSGINSTK2E+21                  | sp 015014 ZN609_HUMAN    |
| 10644 | RSSQPSPTAVPASDSPPTK2002020000000000000         | sp Q9Y5Q9 TF3C3_HUMAN    |
| 10645 | LSKPPFQTNPSPMVSK20000000                       | sp sp Q3KQU3 MA7D1_HUMAN |
| 10646 | MEISAEALPQTPQR20000                            | sp Q4LE39 ARI4B_HUMAN    |
| 10647 | SSSPIPLTPSK20000020000                         | sp Q8IYW7 UBR1_HUMAN     |
| 10648 | RPPEEDFRHSPEEDFR20000000                       | sp Q8N5Y2 MS3L1_HUMAN    |
| 10649 | KTEAAPAAQAQETKSDGAPASDSKPGSSEAAPSSK2E+21       | sp Q8IXT5 RB12B_HUMAN    |
| 10650 | TSSPPSPQHSPALR22000200000                      | sp P80723 BASP1_HUMAN    |
| 10651 | DSMSCGLDSEGATPPPVGRL2.00000020002E+19          | sp Q13029 PRDM2_HUMAN    |
| 10652 | GNDPLTSSPGRSSR20002200                         | sp Q99956 DUS9_HUMAN     |
| 10653 | ADTSQEICSPR2000002000                          | sp P49736 MCM2_HUMAN     |
| 10654 | SAFTPATATGSSSPVGLQGEK202000000000              | sp P52948 NUP98_HUMAN    |
| 10655 | NHLSPPQGGATPVSPCCR20000200000                  | sp Q15811 ITSN1_HUMAN    |
| 10656 | EVDEDESEPER200000                              | sp Q9H4L4 SEN3_HUMAN     |
| 10657 | SRSPQWR20000000                                | sp Q53GS9 SNUT2_HUMAN    |
| 10658 | GLSASLPDLSENWIEVK200000000000000000            | sp Q9UQ35 SRRM2_HUMAN    |
| 10659 | TPPGCCSPGVGWAQR20000002000000000               | sp Q6PKG0 LARP1_HUMAN    |
| 10660 | SRTASGSSVSLDGTR20202022000000000               | sp Q2VPK5 CTU2_HUMAN     |
| 10661 | ASHASSDWTTPRPR2200000000                       | sp Q92597 NDRG1_HUMAN    |
| 10662 | VKSSTPPRQSPSR202000020000                      | sp Q96EB6 SIR1_HUMAN     |
| 10663 | GSDYSWSYQTPSSPSSSSSR2200000000                 | sp Q9UQ35 SRRM2_HUMAN    |
| 10664 | LEEPPELNRQSPNPR200000                          | sp Q765P7 MTSSL_HUMAN    |
| 10665 | GVSASAVPFTPSSPLSCSQEGSR2000000000000           | sp Q7Z5L9 I2BP2_HUMAN    |
| 10666 | YSHVSHSPSK20000                                | sp Q9Y2X7 GIT1_HUMAN     |
| 10667 | RGSLSEQEMAK2000000                             | sp Q14690 RRP5_HUMAN     |
| 10668 | SPSSPELNNK20220000000                          | sp Q8NFC6 BD1L1_HUMAN    |
| 10669 | APSASDSKADSDGAKPEPVAMAR2.020002E+19            | sp Q9UQ35 SRRM2_HUMAN    |
| 10670 | RDSSEGGPPGSEGDGGGQSKPSNASGGVDK2E+27            | sp Q7Z4V5 HDGR2_HUMAN    |
|       |                                                | sp Q9NRH2 SNRK_HUMAN     |

|       |                                                                   |                       |
|-------|-------------------------------------------------------------------|-----------------------|
| 10671 | CQTAEADSESDHEVPEPESEMK2.0000002E+20                               | sp Q9BPX3 CND3_HUMAN  |
|       |                                                                   | sp Q8IYB3 SRRM1_HUMAN |
| 10672 | SRSYSR20200000                                                    | sp Q13595 TRA2A_HUMAN |
|       |                                                                   | sp P62995 TRA2B_HUMAN |
|       |                                                                   | sp Q07955 SRSF1_HUMAN |
| 10673 | TVQSNPISALAPTGK200000000                                          | sp O95292 VAPB_HUMAN  |
| 10674 | GLPSYNMSSAPGSR2000102000200                                       | sp P15924 DESP_HUMAN  |
| 10675 | SSPEQPRPSTSK200000002000                                          | sp P29590 PML_HUMAN   |
| 10676 | RPPTPCSDPERK2002000000                                            | sp Q9BW71 HIRP3_HUMAN |
|       |                                                                   | sp Q29960 1C16_HUMAN  |
|       |                                                                   | sp Q9TNN7 1C05_HUMAN  |
|       |                                                                   | sp P04222 1C03_HUMAN  |
|       |                                                                   | sp Q07000 1C15_HUMAN  |
|       |                                                                   | sp Q29865 1C18_HUMAN  |
| 10677 | GGSCSAASSNSAQGSDESLIACK2000000000                                 | sp Q29963 1C06_HUMAN  |
|       |                                                                   | sp P30504 1C04_HUMAN  |
|       |                                                                   | sp P30505 1C08_HUMAN  |
|       |                                                                   | sp P30508 1C12_HUMAN  |
|       |                                                                   | sp P30510 1C14_HUMAN  |
|       |                                                                   | sp Q95604 1C17_HUMAN  |
|       |                                                                   | sp P01891 1A68_HUMAN  |
|       |                                                                   | sp P01892 1A02_HUMAN  |
| 10678 | GGSYSQAASSDSAQGSVDVSLTACK2E+20                                    | sp P05534 1A24_HUMAN  |
|       |                                                                   | sp Q09160 1A80_HUMAN  |
|       |                                                                   | sp P10316 1A69_HUMAN  |
|       |                                                                   | sp P30447 1A23_HUMAN  |
|       |                                                                   | sp Q9BTX1 NDC1_HUMAN  |
| 10679 | KLNSPEETAFTPK200000002000                                         |                       |
| 10680 | TEPAAEAEAAASGPSESPPPAAEELPGSHAEPVPAQGEAPGEQAR2.000000<br>0002E+29 | sp P55884 EIF3B_HUMAN |
| 10681 | SSSVGSSSYPISPAISR20000000000                                      | sp Q15149 PLEC_HUMAN  |
| 10682 | KSVLPVSK20000200                                                  | sp Q6PCE3 PGM2L_HUMAN |
| 10683 | VHGEPTSDLSID20020000                                              | sp O95696 BRD1_HUMAN  |
| 10684 | VASETHSEGSEYEELPK2000200200000000                                 | sp Q5JSZ5 PRC2B_HUMAN |
| 10685 | TNSAEVTPVLSVMGEATPVSIEPR2.00002000002E+19                         | sp Q6PJG2 EMSA1_HUMAN |
| 10686 | NSASATPLSGNSSR22000000000                                         | sp Q9Y608 LRRF2_HUMAN |
| 10687 | FISDRESR200                                                       | sp Q9H2H9 S38A1_HUMAN |
| 10688 | SLRSPLPSR20202000000                                              | sp Q9NYV4 CDK12_HUMAN |
| 10689 | TGGPAYGPSSDVSTASETESEKR200220200000000                            | sp P51116 FXR2_HUMAN  |
| 10690 | RASPPVSPIPVSEYCESENK2000200000000000000                           | sp Q2M2Z5 KIZ_HUMAN   |
| 10691 | SRSPVLR2000000                                                    | sp Q13523 PRP4B_HUMAN |
| 10692 | SGTPPRQGSITSPQANEQSVTPQR2.02000002E+24                            | sp Q9UQ35 SRRM2_HUMAN |
| 10693 | ERDSELSDTDSGCCLGQSESDK20000000000000000                           | sp Q96T88 UHRF1_HUMAN |
| 10694 | SECDSPEPK2200000                                                  | sp Q9UQ35 SRRM2_HUMAN |
| 10695 | GNKSYLEGSSDNQLK2000022000000                                      | sp Q9UHI6 DDX20_HUMAN |
| 10696 | EIPSATQSPISK2000200000                                            | sp Q9BQG0 MBB1A_HUMAN |
| 10697 | QINYKEDSESDGSQK202002000                                          | sp Q96T23 RSF1_HUMAN  |
| 10698 | AATSPGVGQSAPGTR20000000000000                                     | sp Q6IE81 JADE1_HUMAN |
| 10699 | LSQSSQDSSPVR2000020000                                            | sp O95251 KAT7_HUMAN  |
| 10700 | LPSDTDDSDASEDPGGAER2000020020000000000                            | sp Q9UJK0 TSR3_HUMAN  |
| 10701 | SEPPAPVR200000000                                                 | sp P35398 RORA_HUMAN  |
| 10702 | VKSPQRPSDWSK20000000000                                           | sp Q5UIP0 RIF1_HUMAN  |
| 10703 | IERPGEGLMVDNPMR2000000000                                         | sp Q96T88 UHRF1_HUMAN |
| 10704 | RPESPPSILTPPVPTADK2000000000000000000                             | sp P55198 AF17_HUMAN  |
| 10705 | RPASPSPEHLPATPAESPAQR20000000000000000                            | sp Q9H7L9 SDS3_HUMAN  |



|       |                                                      |                       |
|-------|------------------------------------------------------|-----------------------|
| 10706 | TLENSPISSCDTSDTEGPVPVNSAAVLK2. 0022E+24              | sp Q8N556 AFAP1_HUMAN |
| 10707 | LPALSHSEGEDEDEDEDEDEGKGSSEK2. 02E+23                 | sp P55201 BRPF1_HUMAN |
| 10708 | NSPGVPTGAK2000000000                                 | sp Q08379 GOGA2_HUMAN |
| 10709 | RRPSPQSPR20002000                                    | sp Q9UQ35 SRRM2_HUMAN |
| 10710 | QSVTSFPDADAFHHQVHDDLLSSSEEECKDR2220000000            | sp P50402 EMD_HUMAN   |
| 10711 | FIQELSGSSPK2000000                                   | sp Q01664 TFAP4_HUMAN |
| 10712 | GQSQTSPDHRSDTSSPEVR200002022000000                   | sp Q9UQ35 SRRM2_HUMAN |
| 10713 | GRPGSGTSGVDSLNFIESVK2000000000000000                 | sp Q8IXT5 RB12B_HUMAN |
| 10714 | RPPSQSLTSSSLSPDIFDPSPEEDKEEHISLAHR2000000000000000   | sp Q96B97 SH3K1_HUMAN |
| 10715 | DPQTPVLQTK20000000                                   | sp Q9ULW0 TPX2_HUMAN  |
| 10716 | LAALKDEPQTPDVPVSPFGESPLSPIDMDTQER2000000020001000000 | sp P17535 JUND_HUMAN  |
| 10717 | METVSNASSSSNPSSPGR1000000000200200000                | sp Q9NTI5 PDS5B_HUMAN |
| 10718 | NQTYSFSPSK20000                                      | sp Q86YS7 C2CD5_HUMAN |
| 10719 | LEDVKNSTPFK200000                                    | sp P55327 TPD52_HUMAN |
| 10720 | EWYQSTIPQSPSPAPDDPEEGR2000000000000000000            | sp Q08499 PDE4D_HUMAN |
| 10721 | GPSPEGSSSTESSPEHPPK200020000220000000                | sp Q9UQ35 SRRM2_HUMAN |
| 10722 | SNSQSDSHDEEVSTPPNPVVK2020000020000000000             | sp P31321 KAP1_HUMAN  |
| 10723 | TLTDEVNSPDSR2000000                                  | sp Q8TAQ2 SMRC2_HUMAN |
| 10724 | YSPTSPTYSPK20000030002000                            | sp P24928 RPB1_HUMAN  |
| 10725 | GFINDDDEDEGEDEGSDSGSEDDVGHK20200200000000            | sp Q7KZ85 SPT6H_HUMAN |
| 10726 | HNSESEVPSSMFILEDDR2000000000000000                   | sp Q6R327 RICTR_HUMAN |
| 10727 | TGSNISGASSDISLDEQYKHQLEETK2. 0020022002E+24          | sp P22059 OSBP1_HUMAN |
| 10728 | AESPSPAPPGLR2000000000000                            | sp Q9BUA3 CK084_HUMAN |
| 10729 | LTTEATQTPVSNK2000000                                 | sp Q9BXS6 NUSAP_HUMAN |
| 10730 | TVAISDAAQLPHDYCTTPGGTLFSTTPGGTR3000000000200000000   | sp Q13542 4EBP2_HUMAN |
| 10731 | SRSQRSNSPLPVPPSK2020202020000000000                  | sp Q13247 SRSF6_HUMAN |
| 10732 | ALEQQEAESDSDTEEKDDDDDEEDVGK2. 00202E+21              | sp Q9BXY0 MAK16_HUMAN |
| 10733 | VSSPSPELGTTPASIFR2002000000000000000                 | sp Q99501 GA2L1_HUMAN |
| 10734 | RPDSPTRPTLR2000000000                                | sp Q7RTP6 MICA3_HUMAN |
| 10735 | ASPGTPLSPGLR2000                                     | sp Q96BD0 SO4A1_HUMAN |
| 10736 | SPNPSPERPR20002000000                                | sp Q96ST8 CEP89_HUMAN |
| 10737 | VTRSPSPVQEEHSDPEMTEEEK2. 020200000002E+22            | sp Q8TF01 PNISR_HUMAN |
| 10738 | TPSSEEISPTK2000000000                                | sp Q15311 RBP1_HUMAN  |
| 10739 | AGLSPERPPKTPGSPR200000020000000                      | sp Q9H6F5 CCD86_HUMAN |
| 10740 | SVGRPSPLASGR2000020000000                            | sp Q92738 US6NL_HUMAN |
| 10741 | RLSSTSLASGHSVR202000002000                           | sp Q9BZL6 KPCD2_HUMAN |
| 10742 | SVSPTTEMVSNESVDYR200000000200200000                  | sp P08581 MET_HUMAN   |
| 10743 | RTSTPVMIEGVQEETDTR20000000000000000                  | sp Q8NFC6 BD1L1_HUMAN |
| 10744 | KLPPPGSPGLHSPTASPPPTAR20000000020000000              | sp Q95785 WIZ_HUMAN   |
| 10745 | IISPGSSTPSSTR200200000000                            | sp Q5VT52 RPRD2_HUMAN |
| 10746 | EAYSGCSGPVDECPSPVHK2000000                           | sp Q8N556 AFAP1_HUMAN |
| 10747 | NVSSFPDDATSPLQENR2000000000000000                    | sp P52292 IMA1_HUMAN  |
| 10748 | THTTALAGRSPSPASGR202002000                           | sp Q9UQ35 SRRM2_HUMAN |
| 10749 | REVLVYSEGLSGEER2000200000                            | sp Q9H7N4 SFR19_HUMAN |
| 10750 | MSQPGSPSK202000                                      | sp Q14839 CHD4_HUMAN  |
| 10751 | QGSITSPQANEQSVTPQRR2000000000200000                  | sp Q9UQ35 SRRM2_HUMAN |
| 10752 | VDGPRSPSYGR20000                                     | sp Q07955 SRSF1_HUMAN |
| 10753 | ETKAPPPASPAR2000000000200                            | sp Q5T8A7 PPR26_HUMAN |
| 10754 | EVAENQQNQSSDPEEEKGSQPPAAESQSSLR2E+23                 | sp Q43491 E41L2_HUMAN |
| 10755 | SRSPGRPPK20000000                                    | sp Q14739 LBR_HUMAN   |
| 10756 | EYSPPYAPSHQQYPPSHATPLPK2000000000000000              | sp Q9UPT8 ZC3H4_HUMAN |
| 10757 | GLNPDGTPALSTLGGFSPASKPSSPR20020000000                | sp Q9UK58 CCNL1_HUMAN |

|       |                                                               |                       |
|-------|---------------------------------------------------------------|-----------------------|
| 10758 | SASSESEAEENLEAQPQSTVRPEEIPPIPENR2. 022E+31                    | sp Q13427 PPIG_HUMAN  |
| 10759 | RSSLPVTEDEK2000200000                                         | sp P29374 ARI4A_HUMAN |
| 10760 | RRSPSPPTTR2000000                                             | sp Q8IYB3 SRRM1_HUMAN |
| 10761 | VSMPDVELNLKSPK2000                                            | sp Q09666 AHNK_HUMAN  |
| 10762 | SQQQPTPVTPK2000                                               | sp 095251 KAT7_HUMAN  |
| 10763 | KGQQSGTVSPQKQSAWK2000020000                                   | sp A6QL64 AN36A_HUMAN |
| 10764 | AGAASPLNSPLSSAVPSLGK2000000000000000                          | sp 075962 TRIO_HUMAN  |
| 10765 | YGPADVEDTTGSGATDSKDDDDIDLFGSDDEESEEAKR2. 2E+31                | sp P24534 EF1B_HUMAN  |
| 10766 | LSPEVQSVAESK200000000000                                      | sp Q5T5U3 RHG21_HUMAN |
| 10767 | KHSSDDYYGDISSLESSQK2000000000000000                           | sp Q9UGU5 HMGX4_HUMAN |
| 10768 | NSVQSGESDSDEEESKEPKLKP2. 00202E+21                            | sp 075592 MYCB2_HUMAN |
| 10769 | SSGHSSSELSPDAVEK2000220020000000                              | sp Q9UQ35 SRRM2_HUMAN |
| 10770 | QFTSSSSIK22000                                                | sp Q04695 K1C17_HUMAN |
| 10771 | FQDLSEGSISQLSFAEDISAEDDDQILSQGK20000000000000                 | sp Q14684 RRP1B_HUMAN |
| 10772 | LNSSLVVPYGAESSEDSDEESK300002000000200                         | sp Q9H9J4 UBP42_HUMAN |
| 10773 | KRSYSPDGK20200000                                             | sp P43243 MATR3_HUMAN |
| 10774 | ERSPSPLRGNVPSPLPTR202000000002000000                          | sp Q9Y2V2 CHSP1_HUMAN |
| 10775 | DYTGCTSESLSPVK200020000                                       | sp 095297 MPZL1_HUMAN |
| 10776 | ETSVSKEDTDHEEKASNEVDTK2. 202E+21                              | sp 075475 PSIP1_HUMAN |
| 10777 | SPQNQYPAELMR2000000000100                                     | sp P33993 MCM7_HUMAN  |
| 10778 | HLDGEEDGSSDQSQASGTTGGR20020000000000                          | sp Q9UNF1 MAGD2_HUMAN |
| 10779 | SPVVSVDTSR200000002000                                        | sp TAU_HUMAN          |
|       |                                                               | sp P10636 TAU_HUMAN   |
| 10780 | SRGSSPGLR20202200000                                          | sp Q9UQ35 SRRM2_HUMAN |
| 10781 | TTPSATSLPQTVMVMTSPVLTSTTK2000000000000                        | sp P18846 ATF1_HUMAN  |
| 10782 | EILSHLQGDCTSPGR20000                                          | sp Q9UQ49 NEUR3_HUMAN |
|       |                                                               | sp P01891 1A68_HUMAN  |
|       |                                                               | sp P01892 1A02_HUMAN  |
| 10783 | KGGSYSQAASSDSAQGSVDVSLTACK20002000000000                      | sp P05534 1A24_HUMAN  |
|       |                                                               | sp Q09160 1A80_HUMAN  |
|       |                                                               | sp P10316 1A69_HUMAN  |
|       |                                                               | sp P30447 1A23_HUMAN  |
| 10784 | VLSGNCNHQEGTSSDDELPSAEMIDFQK22000000001000000                 | sp P16383 GCFC2_HUMAN |
| 10785 | SRTASGSSVSLDGTR2022020000000                                  | sp Q92597 NDRG1_HUMAN |
| 10786 | LPASPSGSEDLSSVSSSPTSSPK22000                                  | sp Q9P2N6 KANL3_HUMAN |
| 10787 | SPSSEWLVR20000000                                             | sp Q9NWQ4 GPT2L_HUMAN |
| 10788 | RREEGPPPPSPDGASSDAEPEPPSGR2200000000000                       | sp Q9NTJ3 SMC4_HUMAN  |
| 10789 | SEAPAEVTHFSPK2000                                             | sp Q6PID6 TTC33_HUMAN |
| 10790 | WDCESICSTYSNLYNHPQLIK2200000000000000                         | sp Q96GA3 LTV1_HUMAN  |
| 10791 | LSEQLSFR2000000                                               | sp Q96PK6 RBM14_HUMAN |
| 10792 | TEPSSPLSDPSDIIR200000000000                                   | sp Q9ULJ3 ZBT21_HUMAN |
| 10793 | RPLSGPDVGTQPAGLASGAK2000000000000                             | sp 096013 PAK4_HUMAN  |
| 10794 | EDSGLFSPIR20000                                               | sp Q9UKA4 AKA11_HUMAN |
| 10795 | SFVPEEEKHEER2000000000000                                     | sp 094880 PHF14_HUMAN |
| 10796 | AGYLSGDGSPERPAGPPSPTFRPYEVGPAAR2. 0002000000002E+28           | sp Q6ZW31 SYDE1_HUMAN |
| 10797 | DTGSEVPSGSGHGPTPPAPANFEDVAPTGSGEPTATRESK2. 00000000000002E+28 | sp 015047 SET1A_HUMAN |
| 10798 | STSAPQMSPGSSDNQSSSPQPAQK200022000000000                       | sp Q14157 UBP2L_HUMAN |
| 10799 | TRESHRSSSPTAGPSTEGAEGPEEK2. 0020222E+24                       | sp Q8NHM5 KDM2B_HUMAN |
| 10800 | HLSESSGKPLSTK200200000000                                     | sp Q8IVT2 MISP_HUMAN  |
| 10801 | KPPAPSPVQSQSPSTNWSPAVPVKK2. 000000022002E+20                  | sp Q8IYB3 SRRM1_HUMAN |
| 10802 | AVQTLAGSQPTSDKPSQRPSESTNCSPTR20000000000000                   | sp Q9NR48 ASH1L_HUMAN |
| 10803 | RSSGISPYFSSR2200                                              | sp P10070 GLI2_HUMAN  |
| 10804 | SATSTSASPTLR200000                                            | sp 075061 AUXI_HUMAN  |

|       |                                                     |            |             |
|-------|-----------------------------------------------------|------------|-------------|
| 10805 | KGSSTDISEDWEK2000000000                             | sp Q9NW68  | BSDC1_HUMAN |
| 10806 | HSHKPHPVETSQPSDK2000000                             | sp Q03188  | CENPC_HUMAN |
| 10807 | SPSPSPTPEAK202000200000                             | sp Q8TAQ2  | SMRC2_HUMAN |
| 10808 | GLPSPYNMSSAPGSR3010000200                           | sp P15924  | DESP_HUMAN  |
| 10809 | NRSPSDSDMEDYSPPPSLSEVAR2.0202010002E+21             | sp Q6KC79  | NIPBL_HUMAN |
| 10810 | WGQPPSPTPVPRPPDADPNTSPKPLEGRPER2.00000000000002E+25 | sp Q14839  | CHD4_HUMAN  |
| 10811 | SNSPLPSIQLQPQSPSASKK2000000000000200000             | sp Q08174  | PCDH1_HUMAN |
| 10812 | DTLSNPQSPQSPYNSPKPQHK2.000002000003E+21             | sp Q96PU5  | NED4L_HUMAN |
| 10813 | RFSHLNK200000                                       | sp Q15928  | ZN141_HUMAN |
| 10814 | AATAARPPAPPAPQPPSPTSPPRPTLAR20200000000000          | sp Q96B36  | AKTS1_HUMAN |
| 10815 | SGTAETEPVEQDSSQPSLPLVR2000000000                    | sp Q12888  | TP53B_HUMAN |
| 10816 | KVEEVVYDLSIR3002000                                 | sp Q15631  | TSN_HUMAN   |
| 10817 | SSQPSPTAVPASDSPPTK2000000000000000000               | sp Q3KQU3  | MA7D1_HUMAN |
| 10818 | LSQSSQDSSPVR20000                                   | sp Q095251 | KAT7_HUMAN  |
| 10819 | HSSTGDSADAGPPAAGSAR2000000000000000                 | sp Q6ZU35  | K1211_HUMAN |
| 10820 | YGGSVGSGPPPVAPEPGVPSSPSQEPPTK20000000000            | sp Q04323  | UBXN1_HUMAN |
| 10821 | LSSSSPGATVSPSSSDAEYDKLPDADLAR2.220002E+27           | sp Q8NI08  | NCOA7_HUMAN |
| 10822 | SEVQQPVHPKPLSPDSRASSLESSPDK20022020220000           | sp Q9UHB6  | LIMA1_HUMAN |
| 10823 | GSRPPLILQSQSLPCSSPR20000                            | sp Q6KC79  | NIPBL_HUMAN |
| 10824 | TDTGIVTVEQSPSSSK200                                 | sp Q8NFC6  | BD1L1_HUMAN |
| 10825 | FVPAENDSILMNPADQGEVQLSQNDK2000000                   | sp Q12888  | TP53B_HUMAN |
| 10826 | SVSPESNDISSEELNHFKPIVCSPTPPK2.002002E+27            | sp Q8NCN4  | RN169_HUMAN |
| 10827 | SVASSQPAKPTK2200000000                              | sp Q07157  | ZO1_HUMAN   |
| 10828 | RNSDRSEDGYHSDGDYGEHDYR2.002000002E+20               | sp P52756  | RBM5_HUMAN  |
| 10829 | TASRPDDIPDPSPPK20000000000022000                    | sp Q5VZK9  | LR16A_HUMAN |
| 10830 | SPSDAGRSSGDESKPLPSSSR2.000022E+20                   | sp Q8IVL1  | NAV2_HUMAN  |
| 10831 | YLSFTPPEK20000000                                   | sp Q13177  | PAK2_HUMAN  |
| 10832 | GGHSSVSTESESSSFHSS200000                            | sp P61073  | CXCR4_HUMAN |
| 10833 | SPSPSSPAAVNHSSSDISPVSNSTSSSPGK200000                | sp Q075381 | PEX14_HUMAN |
| 10834 | RASPPPPKR200000000                                  | sp Q8IYB3  | SRRM1_HUMAN |
| 10835 | SPFEHSVEHK200000                                    | sp Q014646 | CHD1_HUMAN  |
| 10836 | SPHQLLSPSSFSPSATPSQK2200000000000                   | sp Q14181  | DPOA2_HUMAN |
| 10837 | EQLSETEGSGEDEPGNDPSETTQKK2.00002E+22                | sp Q13107  | UBP4_HUMAN  |
| 10838 | NSPLDCGSASPDK2000000                                | sp Q075179 | ANR17_HUMAN |
| 10839 | SAGGSSPEGGEDSDREDGNYCPPVK2.00000002E+21             | sp Q9H6Z4  | RANB3_HUMAN |
| 10840 | STPACSPILR2000200000                                | sp Q3KR37  | GRM1B_HUMAN |
| 10841 | KPPAPPSPVQSPSTNWSPAVPVKK2.000002002002E+20          | sp Q8IYB3  | SRRM1_HUMAN |
| 10842 | GEAAPGPAPPAPPEATPPPASAAGK20000000000                | sp Q9NSI2  | F207A_HUMAN |
| 10843 | CPEILSDESSSDEDEKK2000020000000                      | sp P35659  | DEK_HUMAN   |
| 10844 | LPNNSRPSTPTINVLESK2200000000000000                  | sp Q15910  | EZH2_HUMAN  |
| 10845 | TSPADHGGVSGSESGSAVDSVAGEHSVSGR2.000000200202E+30    | sp Q5T4S7  | UBR4_HUMAN  |
| 10846 | ERGSQSSDSSSLSSHR2000000000000                       | sp Q075376 | NCOR1_HUMAN |
| 10847 | SPRPASPASNVLVPSGSTVYVK2002000000000000000           | sp Q7Z589  | EMSY_HUMAN  |
| 10848 | SRTSPITR202200000                                   | sp Q9UQ35  | SRRM2_HUMAN |
| 10849 | GNDPLTSSPGRSSR2020002200                            | sp P49736  | MCM2_HUMAN  |
| 10850 | GSGGSSGDELREDDEPVK2000200000000000000               | sp Q7Z4V5  | HDGR2_HUMAN |
| 10851 | RPPTPEAQSEEERSDEEPEAK2000020000200000000            | sp Q9BTK6  | PAGR1_HUMAN |
| 10852 | PGPTPSGTNVGSSGRSPSK200                              | sp P60468  | SC61B_HUMAN |
| 10853 | SRSPYSPVLR20200000000                               | sp Q14004  | CDK13_HUMAN |
| 10854 | DQPPFGSDSDSVEADKSSPGIHLER2002000002000000000        | sp Q14676  | MDC1_HUMAN  |

|       |                                                    |                       |
|-------|----------------------------------------------------|-----------------------|
| 10855 | DSLITPHVSR200                                      | sp P49792 RBP2_HUMAN  |
|       |                                                    | sp Q7Z3J3 RGPD4_HUMAN |
|       |                                                    | sp A6NKT7 RGPD3_HUMAN |
|       |                                                    | sp O14715 RGPD8_HUMAN |
|       |                                                    | sp Q99666 RGPD5_HUMAN |
|       |                                                    | sp P0DJD0 RGPD1_HUMAN |
|       |                                                    | sp P0DJD1 RGPD2_HUMAN |
|       |                                                    | sp P54278 PMS2_HUMAN  |
| 10856 | HTTENKPHSPKTPEPR200000000200000                    | sp Q68D20 PMS2L_HUMAN |
| 10857 | SPPKVPIVIQDDSLPAGPPPQIR2E+23                       | sp Q7Z422 SZRD1_HUMAN |
| 10858 | I IYDSDESEETLQVK2000200000000                      | sp P35251 RFC1_HUMAN  |
| 10859 | SCSLDLGDAGCYGYAR20000000000000                     | sp Q6PJG9 LRFN4_HUMAN |
| 10860 | TRDDGDEEGLLTHSEEELEHSQDTDADDGALQ2.000000000002E+21 | sp Q9UKM9 RALY_HUMAN  |
| 10861 | DSFIENSSSNTSGSSKPNSPSISPSILSNTEHK2.2002E+27        | sp Q99700 ATX2_HUMAN  |
| 10862 | FSSVSPQPR2000200000                                | sp Q9P206 K1522_HUMAN |
| 10863 | TSPPCSPANLSR2000020000000                          | sp P49585 PCY1A_HUMAN |
| 10864 | VLSQALNGSDSEDMLNSEHK2020000000000                  | sp Q9NSI6 BRWD1_HUMAN |
| 10865 | SQTTTERDSDTDVEEEELPVENR2.2E+20                     | sp Q14676 MDC1_HUMAN  |
| 10866 | LDIPTGTTPQR20000                                   | sp P52732 KIF11_HUMAN |
| 10867 | LAQHITYVHQHSR200                                   | sp P33993 MCM7_HUMAN  |
| 10868 | HAQSDPRSPRTLGIAR200000000                          | sp Q99618 CDCA3_HUMAN |
| 10869 | SLSRTPSPPPFR2020002000000                          | sp Q7L4I2 RSRC2_HUMAN |
| 10870 | SEDDSAKFDSDNEEDSASVFSFGLK2.0002E+26                | sp Q02880 TOP2B_HUMAN |
| 10871 | SRTPSASNDQQE202000000000                           | sp O43765 SGTA_HUMAN  |
| 10872 | LPSSPASPSPK200000000                               | sp Q9H4G0 E41L1_HUMAN |
| 10873 | AQTPPISSLPTSPSDEVGR200000000                       | sp Q15751 HERC1_HUMAN |
| 10874 | GTEASPPQNSGSSSPVFTFR200000202000000000             | sp Q9P1Y5 CAMP3_HUMAN |
| 10875 | SGYSSPGSPGTPGSR2200200000000                       | sp P10636 TAU_HUMAN   |
|       |                                                    | sp TAU_HUMAN          |
| 10876 | LDHGEESNESAESSSNWEK20020000000000                  | sp Q9H4L7 SMRCD_HUMAN |
| 10877 | DSFIENSSSNTSGSSKPNSPSISPSILSNTEHK2020200000000000  | sp Q99700 ATX2_HUMAN  |
| 10878 | EKSPDPQPAVPHPPPSTPIK200000000000000000             | sp P35611 ADDA_HUMAN  |
| 10879 | LGSTGSQPNSEAESVPENVPKPLLPK2E+25                    | sp Q8IZ21 PHAR4_HUMAN |
| 10880 | KDRHDTDPSPR20002000                                | sp Q9BRD0 BUD13_HUMAN |
| 10881 | KPLSREDEIR20000000                                 | sp Q9UKS7 IKZF2_HUMAN |
| 10882 | GQPEGPLPSSSPR2000                                  | sp P49815 TSC2_HUMAN  |
| 10883 | SNTEPQSPIASPK200000000                             | sp P82094 TMF1_HUMAN  |
| 10884 | LASPMKPVPGTPPSSK200000000000200                    | sp Q15648 MED1_HUMAN  |
| 10885 | RSSLSSHSHQSQIYR220000000000                        | sp O15027 SC16A_HUMAN |
| 10886 | HSLSGSSPGMK20200000000                             | sp Q9UQ35 SRRM2_HUMAN |
| 10887 | SRTASGSSVTSLDGTR202022020000000                    | sp Q92597 NDRG1_HUMAN |
| 10888 | SRVSVSPGRTSGK20200020000                           | sp Q8IYB3 SRRM1_HUMAN |
| 10889 | VQIPVSRPDPPEVSDNEEDSYDEEIHDP2.00000002E+24         | sp Q07157 ZO1_HUMAN   |
| 10890 | TSAQHALTSVSRGSSLK22020000000                       | sp P61073 CXCR4_HUMAN |
| 10891 | SPPKSPEEEGAVSS200020000000000                      | sp Q01130 SRSF2_HUMAN |
| 10892 | TATPPGYKPGSPPSFR20000000002000000                  | sp P54259 ATN1_HUMAN  |
| 10893 | QGSITSPQANEQSVTPQRR20200000                        | sp Q9UQ35 SRRM2_HUMAN |
| 10894 | QQAAYYAQTSPQGMPQHPPAPQGQ200000000000000000         | sp Q96AE4 FUBP1_HUMAN |
| 10895 | EFGSPSTPTGTLEFEGGEVSLEGGK202000000000000000        | sp Q09666 AHNK_HUMAN  |
| 10896 | GSISTPNSPVK200020000                               | sp Q96AY4 TTC28_HUMAN |
| 10897 | STSAPQMSPGSSDNQSSSPQPAQQK1.00000000222E+19         | sp Q14157 UBP2L_HUMAN |
| 10898 | SPSTTYLHTPTSEDAAIIPSK2030000000000000000           | sp Q13111 CAF1A_HUMAN |
| 10899 | ASPGTPLSPGSLR2000000002000                         | sp Q96BD0 SO4A1_HUMAN |
| 10900 | KEPAITSQNSPEAR2000000000                           | sp P23193 TCEA1_HUMAN |

|       |                                                  |                        |
|-------|--------------------------------------------------|------------------------|
| 10901 | TEPSSPLSDPSDIIR2000000000000                     | sp Q9ULJ3 ZBT21_HUMAN  |
| 10902 | SAHATAPVNIAGSR20000000000000                     | sp Q9UQ35 SRRM2_HUMAN  |
| 10903 | KPLTSSAAPQRPISTQR200000000000                    | sp Q15691 MARE1_HUMAN  |
| 10904 | SESAPTLHPYSPLSPK2000000000002000                 | sp Q8WUF5 IASPP_HUMAN  |
| 10905 | RPAEATSSPTSPERPR20002000000                      | sp Q9BU76 MMTA2_HUMAN  |
| 10906 | TGSNISGASSDISLDEQYK200000020000000000            | sp P22059 OSBP1_HUMAN  |
| 10907 | TLSITSSGSAVSCSTIPPELVK2.022E+20                  | sp Q9BVS4 RIOK2_HUMAN  |
| 10908 | KLEKEEEEGISQESSEEEQ2200000                       | sp P17096 HMGA1_HUMAN  |
| 10909 | SGSMEEDVDTSPGGDYITSPSSPTSSSR30000020000000       | sp P08651 NFIC_HUMAN   |
| 10910 | QSPSPSEVSQSPGR2000000                            | sp P55201 BRPF1_HUMAN  |
| 10911 | DTFEHDPSESIDEFNKSSATSGDIWPGLSAYDNSPR2.000002E+35 | sp Q9NYF8 BCLF1_HUMAN  |
| 10912 | SATRPSPPER2002020000                             | sp Q9UQ35 SRRM2_HUMAN  |
| 10913 | DSPPLLDAPASPPQASR20000000020000000               | sp Q9BZ71 PITM3_HUMAN  |
| 10914 | KTSDANETEDHLESLICK220000000000000000             | sp Q09161 NCBP1_HUMAN  |
| 10915 | TDTGIVTVEQSPSSSK2000000                          | sp Q8NFC6 BD1L1_HUMAN  |
| 10916 | ASINLLSDKR20020020000                            | sp Q04656 ATP7A_HUMAN  |
| 10917 | QTDPSTPQQESSKPLGGIQPSSQTIQPK2E+23                | sp Q14004 CDK13_HUMAN  |
| 10918 | RSPSPYYSR2000000                                 | sp P62995 TRA2B_HUMAN  |
| 10919 | RLSASSTGSTR2000000000                            | sp Q13595 TRA2A_HUMAN  |
| 10920 | QVNQISGAHNTSDKQTPSKPK20000000000000000           | sp P56945 BCAR1_HUMAN  |
| 10921 | FSPFLQTAEDNTQDEVAGAPADHHGPSDEEQSGPPEDK2E+32      | sp Q9NZJ0 DTL_HUMAN    |
| 10922 | SHSGTSPDNTAPPPPPRPQPSHSR2.02E+25                 | sp Q92766 RREB1_HUMAN  |
| 10923 | SGSPSDNSGAEEMEVSLAKPK2.02002E+19                 | sp Q96D71 REPS1_HUMAN  |
| 10924 | EAQTLDSQIQETSI200                                | sp P31749 AKT1_HUMAN   |
| 10925 | SSDSWEVWGSASTNR2000000000000000                  | sp P27816 MAP4_HUMAN   |
| 10926 | AISAPTSPTR200020000                              | sp Q8N6T3 ARFG1_HUMAN  |
| 10927 | LKSPSMAVSPGWVWASPK20200000000002000              | sp Q9NQG6 MID51_HUMAN  |
| 10928 | NVPQEELESDVDADFK2000200000000                    | sp Q86UU0 BCL9L_HUMAN  |
| 10929 | TSSSETEKKPEKPLILQSLGPK2.002E+21                  | sp O00505 IMA4_HUMAN   |
| 10930 | VSTLAGPSSDDENEEESKPEKEDEPQEDAK2E+28              | sp Q9Y5K6 CD2AP_HUMAN  |
| 10931 | SPTVPSQNPSR200000000000                          | sp Q9ULT8 HECD1_HUMAN  |
| 10932 | KSPSPGVKSPPLSPVGTTPVK20002000200000              | sp Q03164 KMT2A_HUMAN  |
| 10933 | MISTPSPKK2020000                                 | sp Q9BVC5 ASHWN_HUMAN  |
| 10934 | SRSRTPPVTR202000000                              | sp Q53F19 CQ085_HUMAN  |
| 10935 | VDSTTCLFPVEEK2000000000                          | sp Q9UQ35 SRRM2_HUMAN  |
| 10936 | CICPSLPYSPVSSPQSSPR3000020002000                 | sp Q06210 GFPT1_HUMAN  |
| 10937 | SKSPKSPPEEGAVSS20200020000000200                 | sp Q96RR4 KKCC2_HUMAN  |
| 10938 | SENNSSNDIVHVEK20000000000                        | sp Q01130 SRSF2_HUMAN  |
| 10939 | NCPPSPLPLISK200000000                            | sp Q9B XK5 B2L13_HUMAN |
| 10940 | DVDDGSGSPHSPHQLSSK20200000000000                 | sp Q8IWC1 MA7D3_HUMAN  |
| 10941 | DVDDGSGSPHSPHQLSSK200200002000                   | sp Q9H4A3 WNK1_HUMAN   |
| 10942 | QAPGVGAVGGGSPEREVEGAGYNSEDEYEAAR30200000000000   | sp Q9H4A3 WNK1_HUMAN   |
| 10943 | ATTPPNQGRPDSPVYANLQELK2.2E+21                    | sp Q96G74 OTUD5_HUMAN  |
| 10944 | TAPSSPLTSPSDTR220000000000                       | sp Q8IWW6 RHG12_HUMAN  |
| 10945 | ESSANNSVSPSESLR2000002000                        | sp Q8IWB9 TEX2_HUMAN   |
| 10946 | QNSPAGNKENIKNETSPSFSK2.00000000000002E+20        | sp Q04726 TLE3_HUMAN   |
| 10947 | SESPKEPEQLRK2020000000000                        | sp Q99700 ATX2_HUMAN   |
| 10948 | LSSSSPGATVSPSSSDAEYDKLPDADLAR2E+19               | sp P09651 ROA1_HUMAN   |
| 10949 | SGELGLPGAPESSTASAPGEPSPSPPCR200000               | sp Q8NI08 NCOA7_HUMAN  |
| 10950 | EDKSPSEESAPTTSPESVSGVPSSGSSGR200200000000000000  | sp Q5QP82 DCA10_HUMAN  |
| 10951 | EPLENSASESSDTELPEKER20220000000000               | sp P54725 RD23A_HUMAN  |
| 10952 | HSPTSEPTPPGDALPPVSSPHTHR2E+23                    | sp P78337 PITX1_HUMAN  |
| 10953 | YSPTSPTYSPPTPK200000000000                       | sp Q9H6S3 ES8L2_HUMAN  |
|       |                                                  | sp P24928 RPB1_HUMAN   |

|       |                                                        |                       |
|-------|--------------------------------------------------------|-----------------------|
| 10954 | QQDLHLESPQRQEYSPESPR20000000002000                     | sp Q9H6F5 CCD86_HUMAN |
| 10955 | DTFEHDPSSEIDFNK20000000                                | sp Q9NYF8 BCLF1_HUMAN |
| 10956 | YMAENPTAGVVQEEEEEDNLEYSDGNPIAPTK1.00002E+31            | sp Q86XP3 DDX42_HUMAN |
| 10957 | RGSQNSSEHRPPASSTSEDEVKASPSSANK20000020000000           | sp O15014 ZN609_HUMAN |
| 10958 | DYTGCSSTSESLSPVK2020000                                | sp O95297 MPZL1_HUMAN |
| 10959 | NPEAALSPTFR200000                                      | sp Q86U44 MTA70_HUMAN |
| 10960 | SGAQASSTPLSPTR200                                      | sp P02545 LMNA_HUMAN  |
| 10961 | SASPYPHSLSSPQR20000000020000                           | sp Q5T200 ZC3HD_HUMAN |
| 10962 | RPMSDPSWNR20000000                                     | sp Q14C86 GAPD1_HUMAN |
| 10963 | GFNGCDSPEPDGDSLEQSPILLEDK2.000000020002E+19            | sp Q14814 MEF2D_HUMAN |
| 10964 | APTKPPR200000                                          | sp Q9BRG2 SH23A_HUMAN |
|       |                                                        | sp POCL80 GG12F_HUMAN |
|       |                                                        | sp POCL81 GG12G_HUMAN |
| 10965 | YVQPPEMIGPMRPEQFSDEVEPATPEEGEPATQR1.0001000002E+28     | sp POCL82 GG12I_HUMAN |
|       |                                                        | sp Q13065 GAGE1_HUMAN |
|       |                                                        | sp Q13068 GAGE4_HUMAN |
|       |                                                        | sp O76087 GAGE7_HUMAN |
| 10966 | GGSDSSKDPIDVNYEK200000000000                           | sp P09874 PARP1_HUMAN |
| 10967 | SPGSTPTTPTSSQAPQK200220000000000000                    | sp P35658 NU214_HUMAN |
| 10968 | SPQSDPADTPTNTK2002000000000000                         | sp P46013 KI67_HUMAN  |
| 10969 | TLTDEVNSPDSRRR20000                                    | sp Q8TAQ2 SMRC2_HUMAN |
| 10970 | VEMYSGSDDDDFNKLPK132000000000000000                    | sp O60841 IF2P_HUMAN  |
| 10971 | YSPTSPTYSPTSPVYTPSPK2.000003E+20                       | sp P24928 RPB1_HUMAN  |
| 10972 | DSPAFDPSWR20000020000                                  | sp Q9NQS7 INCE_HUMAN  |
| 10973 | EVDPSTGELQSLQMPSESGPSSLDPSQEGPTGLK20000000000000000000 | sp Q13501 SQSTM_HUMAN |
| 10974 | VAEPGAEATSSSTGEESGSEHPPAVPMHNK2.00000002E+21           | sp Q14684 RRP1B_HUMAN |
| 10975 | KCSLPAEEDSVLEK20000000000000                           | sp P27816 MAP4_HUMAN  |
| 10976 | RGSLEMSSDGEPLSR20012200000000                          | sp Q6ZN18 AEBP2_HUMAN |
| 10977 | SRSPSPAPEKK2020000000                                  | sp Q8IYB3 SRRM1_HUMAN |
| 10978 | SPQNDHSDTDSEENRDNQFLTTVK2.0202E+19                     | sp Q86W56 PARG_HUMAN  |
| 10979 | RVSSRSVSGSPEPAK2200202020000000                        | sp Q8IYB3 SRRM1_HUMAN |
| 10980 | NSSTPGLQVPVSPVPIQNK2.2E+20                             | sp Q03164 KMT2A_HUMAN |
| 10981 | SLGVLPTLNSGSPEK2000000000020000                        | sp P42695 CNDD3_HUMAN |
| 10982 | SLDGAEFSRPASVSENHDAGPDGDKR2.0000002E+26                | sp Q9H4G0 E41L1_HUMAN |
| 10983 | KPASPLPATQQEKPSQTPEAGR2E+20                            | sp Q6ZU35 K1211_HUMAN |
| 10984 | SPALHGTPTAGCGSR200000000000200                         | sp Q8IY92 SLX4_HUMAN  |
| 10985 | DNSNSDSEGEDRRPAGPPR200020000000000000                  | sp Q8NCF5 NF2IP_HUMAN |
| 10986 | TLDFDPLLSPASPK2000                                     | sp Q53H80 AKIR2_HUMAN |
| 10987 | KRPSLPSSPSPGLPK20020020000000                          | sp O43294 TGFI1_HUMAN |
| 10988 | KRPQSPSPR202000                                        | sp Q99590 SCAFB_HUMAN |
| 10989 | KLSSGETVTYQK200000000000                               | sp Q70EL2 UBP45_HUMAN |
| 10990 | LDSSEMDHSENEYTMSSPLPGK1000000032100000000              | sp Q9NTI5 PDS5B_HUMAN |
|       |                                                        | sp A8CG34 P121C_HUMAN |
| 10991 | SQTPERPAK2020000000                                    | sp Q96HA1 P121A_HUMAN |
|       |                                                        | sp A6NF01 P121B_HUMAN |
| 10992 | SPQPVCSPAGSEGTK20000002000                             | sp Q6KC79 NIPBL_HUMAN |
| 10993 | GRKPKPERPPSSSSSDSDSDEVDR222220202000000                | sp Q7Z4V5 HDGR2_HUMAN |
| 10994 | FSGWYDADLSPAGHEEAK3000000000000000                     | sp P18669 PGAM1_HUMAN |
| 10995 | QVLTAPGSAGQPRSEDEDSLEEAGSPAPGPCPR2.0002E+30            | sp Q8TBB5 KLDC4_HUMAN |
| 10996 | RSSLSSHSHQSQIYR2202000000000000                        | sp O15027 SC16A_HUMAN |
| 10997 | GTGSESSRASGLVGR2002002002000000                        | sp Q9UH99 SUN2_HUMAN  |
| 10998 | HLDVDLDRQSLSSIDKNPSPR2020000002000                     | sp Q9Y6D5 BIG2_HUMAN  |
| 10999 | TYSECDGTYSPEISWHHR2000000000                           | sp P48651 PTSS1_HUMAN |

|       |                                                       |                       |
|-------|-------------------------------------------------------|-----------------------|
| 11000 | THTTALAGRSPSPASGR20000002000000                       | sp Q9UQ35 SRRM2_HUMAN |
| 11001 | SSDKFCSPISSELAQNHEFYK2E+20                            | sp Q8IVH2 FOXP4_HUMAN |
| 11002 | QSHSGSISPYPK2020000000                                | sp Q9UQ35 SRRM2_HUMAN |
|       |                                                       | sp P49792 RBP2_HUMAN  |
|       |                                                       | sp Q7Z3J3 RGPD4_HUMAN |
| 11003 | YSPKTPPR20020000                                      | sp A6NKT7 RGPD3_HUMAN |
|       |                                                       | sp PODJD0 RGPD1_HUMAN |
|       |                                                       | sp PODJD1 RGPD2_HUMAN |
| 11004 | TDPASLETGQDSEDDSGEPEDWVPDPVDADPGK20000000000000000000 | sp Q9UJX6 ANC2_HUMAN  |
| 11005 | SLPSSPELPR20002000000                                 | sp Q15569 TESK1_HUMAN |
| 11006 | SRTHSTSSSLGSGESPF SR22000000000000                    | sp Q9UGV2 NDRG3_HUMAN |
| 11007 | LQPERGSPK2000                                         | sp Q9UKV3 ACINU_HUMAN |
| 11008 | MSPTPPLFSLPEAR2000000000000000                        | sp Q96FV9 THOC1_HUMAN |
| 11009 | SPAPGAPTR20000000000                                  | sp Q9BQG0 MBB1A_HUMAN |
| 11010 | APPQTHLPSGASSGTGSASATHGGGSPPGTR2E+20                  | sp P46379 BAG6_HUMAN  |
| 11011 | ILGSASPEEEQEKPIIDRPRTR20200000000000000000            | sp Q7Z422 SZRD1_HUMAN |
| 11012 | RPDHSGGSPSPTSEPAR20000000000                          | sp Q8TAD8 SNIP1_HUMAN |
| 11013 | IQQNQSIR2000                                          | sp 075116 ROCK2_HUMAN |
| 11014 | SASPYPHSLSSPQR20000000200000                          | sp Q5T200 ZC3HD_HUMAN |
| 11015 | PGPTPSGTNVGSSGRSPSK220000000                          | sp P60468 SC61B_HUMAN |
| 11016 | TDCEPVGLEPAVEQSSAASELAEASSEELAEAPTEAPSPEAR2E+42       | sp Q15424 SAFB1_HUMAN |
|       |                                                       | sp Q14151 SAFB2_HUMAN |
| 11017 | RSPALHGTPTAGCGSR20000000000000200                     | sp Q8IY92 SLX4_HUMAN  |
| 11018 | SKSPPKVIQDDSLPAGPPPQIR. 00000000000002E+25            | sp Q7Z422 SZRD1_HUMAN |
| 11019 | DYSTLTSVSSHDSR200000                                  | sp P16144 ITB4_HUMAN  |
| 11020 | SNSQSDSHDEEVSTPPNPVVK20000000000                      | sp P31321 KAP1_HUMAN  |
| 11021 | RPGSVSSTDQER2000200000                                | sp Q9H1B7 I2BPL_HUMAN |
| 11022 | GWSQEGPVKSPAECR2000000                                | sp Q9C0C2 TB182_HUMAN |
| 11023 | SGSSQELDVKPSASPQR2000000000020000000                  | sp Q9UQ35 SRRM2_HUMAN |
| 11024 | ALSPVIPLIPR20000000000                                | sp O14686 KMT2D_HUMAN |
| 11025 | QHEAPSNRPLNELLPQGPSR200002000                         | sp P10398 ARAF_HUMAN  |
| 11026 | RDSSESQLASTESDKPTTGR2202000220200000000               | sp Q96B23 CRO25_HUMAN |
| 11027 | SPILEEK20000000                                       | sp Q12830 BPTF_HUMAN  |
|       |                                                       | sp P04198 MYCN_HUMAN  |
| 11028 | FELLTPPLSPSR200020000                                 | sp P01106 MYC_HUMAN   |
|       |                                                       | sp O60245 PCDH7_HUMAN |
| 11029 | SSSPLPTVQLHPQSPTAGK2000000                            | sp Q9Y580 RBM7_HUMAN  |
| 11030 | SGSSHAPQDVLSYPQHVGNSSTSTSPSR2E+19                     | sp Q13427 PIG_HUMAN   |
| 11031 | SETPPHWR2000000                                       | sp Q9NYF8 BCLF1_HUMAN |
| 11032 | SSSPYSKSPVSK220020000000                              | sp Q14676 MDC1_HUMAN  |
| 11033 | SQPPGEDSDTDVDDSDRPPGRPAEVHLER2. 02E+22                | sp Q00613 HSF1_HUMAN  |
| 11034 | EPPSPQSPR20002000                                     | sp Q9HCD5 NCOA5_HUMAN |
| 11035 | YRDSFDGR200000                                        | sp Q8N3V7 SYNPO_HUMAN |
| 11036 | AASPAKPSLDDLVPNLPK200000000000000000                  | sp O14646 CHD1_HUMAN  |
| 11037 | STPEHTWSSR2000000000                                  | sp Q01130 SRSF2_HUMAN |
| 11038 | SRSRSPPVSK202020000000                                | sp P16989 YBOX3_HUMAN |
| 11039 | AGEAPTENPAPPTQSSAE22000                               | sp Q96ST2 IWS1_HUMAN  |
| 11040 | GHHVTDSENDEPLNLNASDSESEELHR2. 020000000002E+23        | sp Q15149 PLEC_HUMAN  |
| 11041 | SRSSVGSSSSYPISPAVSR22220000000000                     |                       |
| 11042 | LGGDEDGYEEEEEDENSRQSEDDSETEKPEADDPK200002000000000000 | sp Q9UHR5 S30BP_HUMAN |
| 11043 | SLENETLNKEEDCHSPTSKPPKPDQPLK2000000000000000          | sp P23588 IF4B_HUMAN  |
| 11044 | GPHHLDNSSPGGSEAR20000000000                           | sp Q8WWM7 ATX2L_HUMAN |
| 11045 | GLQDGLRSSNSR2220200                                   | sp P36915 GNL1_HUMAN  |

|       |                                                     |                       |
|-------|-----------------------------------------------------|-----------------------|
|       |                                                     | sp P49792 RBP2_HUMAN  |
|       |                                                     | sp Q7Z3J3 RGPD4_HUMAN |
| 11046 | LNQSGTSVGTDEESDVTQEEER20020002002000000             | sp A6NKT7 RGPD3_HUMAN |
|       |                                                     | sp PODJD0 RGPD1_HUMAN |
|       |                                                     | sp PODJD1 RGPD2_HUMAN |
| 11047 | KAPSASDSKADSDGAKPEPVAMAR2.0002020002E+23            | sp Q7Z4V5 HDGR2_HUMAN |
| 11048 | GEGDAPFSEPGTTSTQRPSSPETATK220000000                 | sp Q9UQ35 SRRM2_HUMAN |
| 11049 | AGLGSPPERPPKTSFGSPR20000000002000                   | sp Q9H6F5 CCD86_HUMAN |
| 11050 | LSPVPVPR20000000                                    | sp Q9UKM9 RALY_HUMAN  |
| 11051 | AGAGPGGPPQKPAPSSQR2000                              | sp Q9Y5J1 UTP18_HUMAN |
| 11052 | GRPSKTPSPSQPK200020000                              | sp Q9NTI5 PDS5B_HUMAN |
| 11053 | DDSHSAEDSEDEKEDHKNVR2020002000000000000             | sp Q9H1E3 NUCKS_HUMAN |
| 11054 | TPTPSTPGDTQPNTAPVPPAEDGIK2.20002E+22                | sp Q14839 CHD4_HUMAN  |
| 11055 | GSTTNDPPKQSPGSTSPKPPHTLSR2002000000000000           | sp O43159 RRP8_HUMAN  |
| 11056 | LPPLQPEEDDDEDEEDDDLSQGYDSSER2000022000              | sp Q9HCK8 CHD8_HUMAN  |
| 11057 | IEEAPEATPQSPQPGSSPISLSAEEENAEGEVSER2020000000000200 | sp Q9H4L7 SMRCD_HUMAN |
| 11058 | GPPSPPAPVMHSPSRK20000010200000                      | sp Q13573 SNW1_HUMAN  |
| 11059 | RKSLDSESDSK200000200000                             | sp Q13185 CBX3_HUMAN  |
| 11060 | YLEEDEDLDF20000000                                  | sp P11388 TOP2A_HUMAN |
| 11061 | EWSLESSPAQNWTTPQPR2000000                           | sp Q8N6T3 ARFG1_HUMAN |
| 11062 | DSPDSPEPPNKKPLVEMDETPQVEK2E+24                      | sp Q9NVM9 ASUN_HUMAN  |
| 11063 | LKLSPPSSR20000000                                   | sp Q03252 LMNB2_HUMAN |
|       |                                                     | sp P20700 LMNB1_HUMAN |
| 11064 | ASALGLGDGEEAAPPSSDPDGGDSPLPASGGPLTCK2.0000002E+20   | sp Q8N1G0 ZN687_HUMAN |
| 11065 | LRSPSNDSAHR2020020000                               | sp Q5T200 ZC3HD_HUMAN |
| 11066 | NSNFSVQHPSSTSPTEK2000                               | sp Q03468 ERCC6_HUMAN |
| 11067 | VAFDPEQKPLHGVLKTPPTSPASSPLVAK200020000000000        | sp Q14684 RRP1B_HUMAN |
| 11068 | STPLASPSPPGR2020000                                 | sp Q8WYP5 ELYS_HUMAN  |
| 11069 | TELNSSAESEQPLDK220020000000                         | sp Q9Y5B6 PAXB1_HUMAN |
| 11070 | GSHSPQRQLHSPAQSEGSSLCGK2.00000002E+22               | sp P10074 ZBT48_HUMAN |
| 11071 | RSLSGSSPCPK20000200000                              | sp Q9UQ35 SRRM2_HUMAN |
| 11072 | KPSGDSQPSSPR2000                                    | sp Q9C0H5 RHG39_HUMAN |
| 11073 | NALFPEVFSPTPDENSQNSR200                             | sp Q8IVT2 MISP_HUMAN  |
| 11074 | SSPQHSLSNPLPR2000002000000                          | sp Q86UE8 TLK2_HUMAN  |
| 11075 | GSVSSVSPKPPSSFK2002000000000                        | sp Q9NZJ0 DTL_HUMAN   |
| 11076 | KPIDSLRDSRSLSYSPVER202020200000                     | sp Q9UQ35 SRRM2_HUMAN |
| 11077 | LGHPEALSAGTGSPPSFTYAQQR2000000000000000000          | sp Q15942 ZYG_HUMAN   |
| 11078 | RRSFSISPSR202000200                                 | sp P18583 SON_HUMAN   |
| 11079 | STSPIIGSPPVR200000200000                            | sp Q86TB9 PATL1_HUMAN |
| 11080 | SSPNFITGLTR200000000000                             | sp O43426 SYNJ1_HUMAN |
| 11081 | AAKPGPAEAPSPTASPSGDASPPATAPYDPR2.0002E+19           | sp Q9UPT8 ZC3H4_HUMAN |
| 11082 | RKPSTSDSDSNFEK220020000000                          | sp P11388 TOP2A_HUMAN |
| 11083 | LSGINEIPRPFSPVTSNTSPPAAPLAR2000000020000000000      | sp Q0JRZ9 FCHO2_HUMAN |
| 11084 | YTPTSPSYSSPEYTPSPK300000000020000                   | sp P24928 RPB1_HUMAN  |
| 11085 | AITPPQQPYK200000000                                 | sp Q9NYV4 CDK12_HUMAN |
| 11086 | RPDHSGGSPSPPTSEPAR200002200000                      | sp Q8TAD8 SNIP1_HUMAN |
| 11087 | SPISDNSGCDAPGNSNPSLSPSSAESEK2.002E+26               | sp Q99590 SCAFB_HUMAN |
| 11088 | RGSSPGSLEIPK22000000000                             | sp Q6GYQ0 RGPA1_HUMAN |
| 11089 | LPSSPVYEDAASFK2000000002000                         | sp Q14247 SRC8_HUMAN  |
| 11090 | HGSDPAFAPGPR20000000000                             | sp Q6ZRV2 FA83H_HUMAN |
| 11091 | RGGHSSVSTESESSSFHSS2000000000000000                 | sp P61073 CXCR4_HUMAN |
| 11092 | SPQPVCSPAGSEGTK20000000000                          | sp Q6KC79 NIPBL_HUMAN |
| 11093 | SRSRDSGDENEPIQER200200000000000                     | sp Q8WX93 PALLD_HUMAN |
| 11094 | DLAVPAALTPR2000                                     | sp Q8TEM1 PO210_HUMAN |



|       |                                                       |                       |
|-------|-------------------------------------------------------|-----------------------|
| 11095 | LQADPKPISPQQK200000                                   | sp 075128 COBL_HUMAN  |
| 11096 | SPSESSPQHPTTPARPR220200000000000000                   | sp 014733 MP2K7_HUMAN |
| 11097 | AGLESGAEPGDGSDTTKKK20000000020000000                  | sp 060832 DKC1_HUMAN  |
| 11098 | TESPQGLPTVQR20000000000                               | sp P15822 ZEP1_HUMAN  |
| 11099 | TVDSQGPTPVCTPTFLER20000000                            | sp Q9BYG3 MK67I_HUMAN |
| 11100 | SASPYPHSLSSPQR20003000000200000                       | sp Q5T200 ZC3HD_HUMAN |
| 11101 | EYSPPYAPSHQQYPPSHATPLPK2E+21                          | sp Q9UPT8 ZC3H4_HUMAN |
| 11102 | VYTYIQSR300000                                        | sp Q9NR20 DYRK4_HUMAN |
| 11103 | EGNTTEDDFPSSPGNGNK20000000                            | sp Q92630 DYRK2_HUMAN |
| 11104 | ETPRPEGGSPSPAGTPPQPK20002000000                       | sp Q15007 FL2D_HUMAN  |
| 11105 | SSTPSSPTGTSSSDSGHHIGWGER2.022E+23                     | sp Q9BR39 JPH2_HUMAN  |
| 11106 | SRSPIIHSPK20200000000                                 | sp P46019 KPB2_HUMAN  |
| 11107 | SGDETPGSEVPGDK20000000000                             | sp 094913 PCF11_HUMAN |
| 11108 | SCVEEPEPEPEAAEGDGKKGNAEGSSDEEGK20000000               | sp Q1KMD3 HNRL2_HUMAN |
| 11109 | SRSWTSFK202000000                                     | sp P51858 HDGF_HUMAN  |
| 11110 | SPVSGAPQAAAPAPAAHVAGNPGDAAPAATGTAASLATAAGSEDAEKK2E+48 | sp 075494 SRS10_HUMAN |
| 11111 | SQDSYPGSPSLSPR200030020002000                         | sp P16989 YBOX3_HUMAN |
| 11112 | STSPAGQHHSPISSR220000002002000                        | sp Q6VN20 RBP10_HUMAN |
| 11113 | SPVKEPVEQPR200000000000                               | sp Q5T200 ZC3HD_HUMAN |
| 11114 | RESGRPIKPPR2000000000                                 | sp Q96T58 MINT_HUMAN  |
| 11115 | ASVALTPTAPSR20000000                                  | sp P25440 BRD2_HUMAN  |
| 11116 | MSSPETDEEIEK220020000000                              | sp P28290 SSFA2_HUMAN |
| 11117 | TGEPSPPHDILHEPPDVVSDDEKDHGK2.00000000000002E+23       | sp Q6UWZ7 F175A_HUMAN |
| 11118 | SAGAGSPARPPSPR2000002000                              | sp Q15311 RBP1_HUMAN  |
| 11119 | RPGSVSSTDQER2000000000                                | sp P83369 LSM11_HUMAN |
| 11120 | HKSDSPESDAEREK2020020000000                           | sp Q9H1B7 I2BPL_HUMAN |
| 11121 | SETAPAAPAAPAPAEKTPVK20000                             | sp 075400 PR40A_HUMAN |
| 11122 | IPMPSSPQPR1002000000                                  | sp P10412 H14_HUMAN   |
|       |                                                       | sp Q8WUF5 IASPP_HUMAN |
|       |                                                       | sp P58876 H2B1D_HUMAN |
|       |                                                       | sp P23527 H2B1O_HUMAN |
|       |                                                       | sp Q99880 H2B1L_HUMAN |
|       |                                                       | sp P06899 H2B1J_HUMAN |
|       |                                                       | sp Q16778 H2B2E_HUMAN |
|       |                                                       | sp P33778 H2B1B_HUMAN |
|       |                                                       | sp Q5QNW6 H2B2F_HUMAN |
| 11123 | QVHPDTGISSK2000                                       | sp Q93079 H2B1H_HUMAN |
|       |                                                       | sp Q96A08 H2B1A_HUMAN |
|       |                                                       | sp P57053 H2BFS_HUMAN |
|       |                                                       | sp 060814 H2B1K_HUMAN |
|       |                                                       | sp P62807 H2B1C_HUMAN |
|       |                                                       | sp Q99877 H2B1N_HUMAN |
|       |                                                       | sp Q99879 H2B1M_HUMAN |
|       |                                                       | sp Q8N257 H2B3B_HUMAN |
| 11124 | AEDEECENDGVGNLLCSYGTTPDSPGNLLSFPR200020000000000      | sp P78356 PI42B_HUMAN |
| 11125 | KLSKTHTHSDSALK20000020000                             | sp Q2LD37 K1109_HUMAN |
| 11126 | ASVLDTSMSAGSGSPSK10000020000                          | sp Q9UPQ0 LIMC1_HUMAN |
| 11127 | KGKSEMQGGSK200000200                                  | sp Q9H3H9 TCAL2_HUMAN |
| 11128 | SESARGSDSEDEVLR2020002020000000                       | sp Q8WVC0 LEO1_HUMAN  |
| 11129 | LIHGEDSDSEGEERSSGCSEAGGAGHEEGR2.020000000002E+27      | sp Q9C0C9 UBE2O_HUMAN |
| 11130 | GRSRTPTSR202000000                                    | sp Q9UQ35 SRRM2_HUMAN |
| 11131 | LLGSSFSSGPVADGIIR20000000000                          | sp 043597 SPY2_HUMAN  |
| 11132 | KVVVSPTKK2000                                         | sp P19338 NUCL_HUMAN  |

|       |                                              |                       |
|-------|----------------------------------------------|-----------------------|
| 11133 | TGTLQDLIQHGSPINNECHPSLER20000000000000       | sp Q5VWN6 F208B_HUMAN |
| 11134 | SRSPLDKDYPPSASVVGASVGGHR2.00000000002E+23    | sp Q96T37 RBM15_HUMAN |
| 11135 | QIASQFPPPTTPAMESQPLKVPANVAPQSPPAVK2000000    | sp Q70E73 RAPH1_HUMAN |
| 11136 | RLSLDSSCLDSSR200000000000                    | sp Q9BWT3 PAPOG_HUMAN |
| 11137 | ALQTSPQPPEGPGLPR200000000000                 | sp Q6PFW1 VIP1_HUMAN  |
| 11138 | QFDEESLESFSSMPDPVDPTTVTK2022000000000000     | sp Q15154 PCM1_HUMAN  |
| 11139 | QSVTSFPDADAFHHQVHDDLLSSSEEECK22000000        | sp P50402 EMD_HUMAN   |
| 11140 | LCPSCPASSPK2000                              | sp Q9Y4H2 IRS2_HUMAN  |
| 11141 | STSATDTHHVEMAR2000000000                     | sp O14874 BCKD_HUMAN  |
| 11142 | RGNDPLTSSPGR200000                           | sp P49736 MCM2_HUMAN  |
| 11143 | LQQTVPADASPSK200000000000                    | sp Q9NS56 TOPRS_HUMAN |
| 11144 | GNEPGSDRSPSPSK2000020000                     | sp Q5VT52 RPRD2_HUMAN |
| 11145 | TPTSSPASSPLVAK202000002000000                | sp Q14684 RRP1B_HUMAN |
| 11146 | SPSEESAPTTSPESVSGVSPSSGSSGR2.2E+19           | sp P54725 RD23A_HUMAN |
| 11147 | KNSTDLDAPEDPTSPK2200020000002000             | sp Q96RK0 CIC_HUMAN   |
| 11148 | VISDESSEDIGGSDVEFKPDK20000000000             | sp P52701 MSH6_HUMAN  |
| 11149 | RNSSSPVSPASVPGQR2000020000000000             | sp Q9H1B7 I2BPL_HUMAN |
| 11150 | SGSSSPDSEITELK200200000000                   | sp P17812 PYRG1_HUMAN |
| 11151 | ISDSESEDPPRNQASDSENEELPKPR2.0202E+25         | sp Q96ST2 IWS1_HUMAN  |
| 11152 | RSSRSSPELTR2022000000                        | sp Q9UQ35 SRRM2_HUMAN |
| 11153 | QKSFSEDVISHK200000000000                     | sp Q03001 DYST_HUMAN  |
| 11154 | ADPHLEFQFPQSP200                             | sp Q96NT5 PCFT_HUMAN  |
| 11155 | QGSITSPQANEQSVTPQR20000000002000000          | sp Q9UQ35 SRRM2_HUMAN |
| 11156 | AVTGQTTQVSPPIAGR2000000000                   | sp Q6MZP7 LIN54_HUMAN |
| 11157 | NPLFDHAALSAPLPAPSSPPALP20000000              | sp Q9NQX5 NPDC1_HUMAN |
| 11158 | FFTTPSKSVR200002000                          | sp O76021 RL1D1_HUMAN |
| 11159 | RSPERPTGDLR200000000000                      | sp Q5T200 ZC3HD_HUMAN |
| 11160 | MSSPPSPQK2000020000                          | sp Q9Y2H6 FND3A_HUMAN |
| 11161 | SYLEGSSDNQLK2000022000000                    | sp Q9UHI6 DDX20_HUMAN |
| 11162 | MSSHTETSSFLQTLTGR2000000000000000            | sp Q96N67 DOCK7_HUMAN |
| 11163 | SSSQRSPSPGNHTSNSSNASNATVVPQNSSAR2.022E+19    | sp Q9BTA9 WAC_HUMAN   |
| 11164 | SLSSSPVKK200000                              | sp Q9H3Q1 BORG4_HUMAN |
| 11165 | QPEYSPESPR20000000                           | sp Q9H6F5 CCD86_HUMAN |
| 11166 | VPPAPVPCPPSPGPSAVPSSPK22000                  | sp O95817 BAG3_HUMAN  |
| 11167 | SEEHHLYSNPIK20000000000000                   | sp O15042 SR140_HUMAN |
| 11168 | ASIQECILPDSPLYHNK20000000                    | sp Q9NXE4 NSMA3_HUMAN |
| 11169 | TRTSQEELLAEVVQGQSR2000000000000000           | sp Q6PJT7 ZC3HE_HUMAN |
| 11170 | RSLTNSHLEK2000200000                         | sp Q9H2H9 S38A1_HUMAN |
| 11171 | ENASPAPGTTAEAMSR200000000000                 | sp P46379 BAG6_HUMAN  |
| 11172 | IEEVLSPEGSPSKSPSK200                         | sp Q9UEY8 ADDG_HUMAN  |
| 11173 | YDEGSGSGDEGRDEAHKR2002000000000000           | sp O94762 RECQ5_HUMAN |
| 11174 | QRSHSGTSPDNTAPPPPPRPPQPSHSR2.022E+23         | sp Q96D71 REPS1_HUMAN |
| 11175 | LQSSDPDTGSEEEGSSRLSPPHSPR2.2E+23             | sp Q92974 ARHG2_HUMAN |
| 11176 | RDSFDDRGPVLDYDHGSR2E+20                      | sp P43243 MATR3_HUMAN |
| 11177 | SPFNSPSPQDSR2020000000                       | sp P08651 NFIC_HUMAN  |
| 11178 | DSGSDTASAIIPSTTPSVDSDESUVK2E+22              | sp Q6WKZ4 RFIP1_HUMAN |
| 11179 | SPPSPPTH200020000000                         | sp Q96HA1 P121A_HUMAN |
| 11180 | GSPSPASVSSGR202000000000                     | sp P10398 ARAF_HUMAN  |
| 11181 | NSDSIVSLPQSDRSSSSQESLNRPLSAK2222200000000000 | sp Q7Z460 CLAP1_HUMAN |
| 11182 | SPQRSPLQSAESSPTAGK2000200000002020000        | sp Q8IWB9 TEX2_HUMAN  |
| 11183 | GSETGSETHESDLAPSDK200200000000               | sp P48634 PRC2A_HUMAN |
| 11184 | RHSASNLHALAHPAPSPGSCSPK2.00000000002E+19     | sp P47974 TISD_HUMAN  |
| 11185 | SPQNQYPAELMR20000000000000                   | sp P33993 MCM7_HUMAN  |
| 11186 | DHAPSIPTSPFGDSLESSTELR200000000000000000     | sp Q9Y4B5 MTCL1_HUMAN |

|       |                                                                        |    |        |             |
|-------|------------------------------------------------------------------------|----|--------|-------------|
| 11187 | RLSPSASPPR2020000                                                      | sp | Q8IYB3 | SRRM1_HUMAN |
| 11188 | KLSSERPSSDGEVVENGITTENGK2. 20002E+23                                   | sp | Q8N556 | AFAP1_HUMAN |
| 11189 | VPEKPPTPKESPFFYR20002000000                                            | sp | Q9HDC5 | JPH1_HUMAN  |
| 11190 | EEATYGVWAERDSDDERPSFGGK3E+19                                           | sp | Q9UBB9 | TFP11_HUMAN |
| 11191 | RQSSGSATNVASTPDNR220000000000000                                       | sp | Q7Z460 | CLAP1_HUMAN |
| 11192 | AAAAGSAPSQAGPGSAPSSAASGASSPAPASGPAPSAVSSSSPTPPVR200002<br>000000000000 | sp | Q96C12 | ARMC5_HUMAN |
| 11193 | VPGGSPLGVSLVYSDK2000000000000                                          | sp | Q96RK0 | CIC_HUMAN   |
| 11194 | MIDQVFGVLESPELSR200                                                    | sp | Q9Y4F5 | C170B_HUMAN |
| 11195 | KPGSPGSESPK200000000                                                   | sp | Q96JM3 | CHAP1_HUMAN |
| 11196 | LQLQLDLSSR200                                                          | sp | P49454 | CENPF_HUMAN |
| 11197 | RSSLSPSSAYER200000200000                                               | sp | Q9BYW2 | SETD2_HUMAN |
| 11198 | TSVPSPEQPQPYR2002000000000                                             | sp | Q8TEH3 | DEN1A_HUMAN |
| 11199 | FAAHISPAQSPKPPPAASPGVR2000020000000200000                              | sp | P19484 | TFEB_HUMAN  |
| 11200 | SKSPPKSPEEEGAVSS20200000000000200                                      | sp | Q01130 | SRSF2_HUMAN |
| 11201 | VNQSALAVTPSPSFQQR20000000                                              | sp | Q9UKG1 | DP13A_HUMAN |
| 11202 | SEAGHASSPDSEVTSLCQK2000000000                                          | sp | Q6NZY4 | ZCHC8_HUMAN |
| 11203 | EALNIGDITSTVSTVPPVDDTLQSASSHSPTQR2000000                               | sp | P50570 | DYN2_HUMAN  |
| 11204 | NHKPSRSFSR2020200                                                      | sp | P84103 | SRSF3_HUMAN |
| 11205 | TLSSPSNRPSGETSVPPPPAVGR20000000000                                     | sp | Q8WWM7 | ATX2L_HUMAN |
| 11206 | AATKSPQPTPGR200000000                                                  | sp | 094761 | RECQ4_HUMAN |
| 11207 | VSSPSCDSQGLHAEAPSSEPQSPVAQTSGWPACSTPLPLVSR2. 0002E+25                  | sp | Q96RE7 | NACC1_HUMAN |
| 11208 | SRTSPVTR202200000                                                      | sp | Q9UQ35 | SRRM2_HUMAN |
| 11209 | NHSGSRTPPVALNSSR202020000000200                                        | sp | Q9UQ35 | SRRM2_HUMAN |
| 11210 | SCTPSPDQISHRASLEDAPVDDLTR2. 0202000000002E+25                          | sp | Q7Z2W4 | ZCHV_HUMAN  |
| 11211 | LVKPSSSSGSR2000000                                                     | sp | Q9H6B4 | CLMP_HUMAN  |
| 11212 | TASISSPSEGTPTVGSYGCTPQSLPK20200200020000000                            | sp | Q6PKG0 | LARP1_HUMAN |
| 11213 | DGTAPPPQSPGSPGTGQDEEWSDEESPRK2000000200020000                          | sp | Q9UKS6 | PACN3_HUMAN |
| 11214 | GWSQEGPVK20000000                                                      | sp | Q9COC2 | TB182_HUMAN |
| 11215 | SRPTSFADELAAR200000000000000                                           | sp | Q641Q2 | FA21A_HUMAN |
|       |                                                                        | sp | Q9Y4E1 | FA21C_HUMAN |
|       |                                                                        | sp | Q5SNT6 | FA21B_HUMAN |
| 11216 | RYSGSDSDSISEGKRPK2020202000000000                                      | sp | 014646 | CHD1_HUMAN  |
| 11217 | EGQPSPADEKGNDSGEGESDDPEK2E+21                                          | sp | 075351 | VPS4B_HUMAN |
| 11218 | NSSPPSPNKNNNAVDSGIHLTIEMNK2. 2E+26                                     | sp | P20020 | AT2B1_HUMAN |
|       |                                                                        | sp | P05534 | 1A24_HUMAN  |
|       |                                                                        | sp | P30447 | 1A23_HUMAN  |
| 11219 | GGSYSQAASSDSAQGSVDVSLTACK2E+22                                         | sp | P01891 | 1A68_HUMAN  |
|       |                                                                        | sp | P01892 | 1A02_HUMAN  |
|       |                                                                        | sp | Q09160 | 1A80_HUMAN  |
|       |                                                                        | sp | P10316 | 1A69_HUMAN  |
| 11220 | NEIIQSPISQVPSVEK20000                                                  | sp | Q7Z3T8 | ZFY16_HUMAN |
| 11221 | HSDNPSEEGEVKDDGLEKSPMK2. 0002E+21                                      | sp | 014647 | CHD2_HUMAN  |
| 11222 | KQQHVISTEEGDMMETNSTDDEK110002200000                                    | sp | Q9H0E3 | SP130_HUMAN |
| 11223 | TISINSPK2002000                                                        | sp | Q9P1Y6 | PHRF1_HUMAN |
| 11224 | LSQSSQDSSPVR2200020000                                                 | sp | 095251 | KAT7_HUMAN  |
| 11225 | WDEQTSNTKGDDDEESDEEAVKK200000000                                       | sp | 043395 | PRPF3_HUMAN |
| 11226 | STSYGYSR200                                                            | sp | Q13242 | SRSF9_HUMAN |
| 11227 | VLSQSTPGTPSK20000                                                      | sp | Q6MZP7 | LIN54_HUMAN |
| 11228 | RYSDLTTLVAFSSSVYPTK2000000000000000000                                 | sp | P25205 | MCM3_HUMAN  |
| 11229 | AEPASPDSPKGSSETETEPVALAPGPAPTR2. 00022E+24                             | sp | P11474 | ERR1_HUMAN  |
| 11230 | LNSPPSSIYK200000000                                                    | sp | Q53EP0 | FND3B_HUMAN |

|       |                                                      |                       |
|-------|------------------------------------------------------|-----------------------|
| 11231 | KFELLTPPLSPSR20000                                   | sp P04198 MYCN_HUMAN  |
|       |                                                      | sp P01106 MYC_HUMAN   |
| 11232 | MATLTSGGEKPNKDLESCSDDDNQGSK2E+25                     | sp Q5T3I0 GPTC4_HUMAN |
| 11233 | EEGSLSDTEADAVSGQLPDPTTNPAGK2.02E+25                  | sp Q8N1G4 LRC47_HUMAN |
|       |                                                      | sp P49792 RBP2_HUMAN  |
|       |                                                      | sp Q7Z3J3 RGPD4_HUMAN |
| 11234 | EDALDDSVSSSVHASPLASSPVRK2.0200000000002E+19          | sp O14715 RGPD8_HUMAN |
|       |                                                      | sp Q99666 RGPD5_HUMAN |
|       |                                                      | sp A6NKT7 RGPD3_HUMAN |
| 11235 | NMAPSQSPVR20000                                      | sp Q9NYB9 ABI2_HUMAN  |
| 11236 | RGSPTTGFIEQK20000000000                              | sp Q6ZRV2 FA83H_HUMAN |
| 11237 | SHNNFVAILDPEGEHQYK2E+19                              | sp Q9Y478 AAKB1_HUMAN |
| 11238 | QSVTSFPDADAFHHQVHDDLLSSSEEECKDR2E+31                 | sp P50402 EMD_HUMAN   |
| 11239 | DTHEDHDTSTENTDESNHDPQFEPIVSLPEQEI2E+22               | sp P43487 RANG_HUMAN  |
| 11240 | GHPAQRPEPSPPEPEPQAPEGSQAGAEGPSSPEASRSPAR200000020000 | sp Q6ZW31 SYDE1_HUMAN |
| 11241 | MSQPGSPSKTPTPSTPGDTQPNTAPVPPAEDGIK2.0002E+21         | sp Q14839 CHD4_HUMAN  |
| 11242 | ATRPASTSQPDPSPDR200000020000                         | sp P20749 BCL3_HUMAN  |
| 11243 | SPHQLLSPSSFSPSATPSQK202000000000                     | sp Q14181 DPOA2_HUMAN |
| 11244 | STSAPQMSPGSSDNQSSSPQPAQQK2.00002002E+23              | sp Q14157 UBP2L_HUMAN |
| 11245 | ICTLSPSPPLASLAPVADSSTR200200000000000000             | sp Q9UER7 DAXX_HUMAN  |
| 11246 | RVSSDEEHTVDSCISDMK22000000000000100                  | sp Q70CQ2 UBP34_HUMAN |
| 11247 | DLSTSPKPSPIPSPVLGR2200000002000000                   | sp Q8NDI1 EHBP1_HUMAN |
| 11248 | EQDCGEPASPAASISR200000000                            | sp O60353 FZD6_HUMAN  |
| 11249 | RSPSPTTPGPSR20200000000                              | sp P49450 CENPA_HUMAN |
| 11250 | SKPNLPSESRSR20200                                    | sp Q08170 SRSF4_HUMAN |
| 11251 | ARPQPSGPAPSS20                                       | sp Q96MG7 MAGG1_HUMAN |
| 11252 | SPPSVQSLAMR200000000100                              | sp Q96KQ7 EHMT2_HUMAN |
| 11253 | RPESAPAESSPSK220000                                  | sp Q07889 SOS1_HUMAN  |
| 11254 | SSGTPGCSSGTERPQSPGSSK2000000                         | sp Q8IYD8 FANCM_HUMAN |
| 11255 | TQSEESRPSLQQPATSTTETPASPAHTTPTQSTSGR2000000000000000 | sp P15336 ATF2_HUMAN  |
| 11256 | AVGMPSPVSPK102002000                                 | sp Q9UHB7 AFF4_HUMAN  |
| 11257 | ICTLSPSPPLASLAPVADSSTR200000000000                   | sp Q9UER7 DAXX_HUMAN  |
| 11258 | VGASDGVFR2000000                                     | sp Q9NYQ8 FAT2_HUMAN  |
| 11259 | NAIASDSEADSDTEVPK200020000000                        | sp Q8WVC0 LEO1_HUMAN  |
| 11260 | VASFIPGSSSR200000000000                              | sp Q14573 ITPR3_HUMAN |
| 11261 | ASSPTKTSPTTPEASATNSPCTSKPATPAPSEK2.0220002E+26       | sp Q12873 CHD3_HUMAN  |
| 11262 | TPTCQSSTDCSPYAR200000                                | sp O95235 KI20A_HUMAN |
| 11263 | FGSTGSTPPVSPTPSER2200000000002000                    | sp Q969V6 MKL1_HUMAN  |
| 11264 | SPTTPIDPEK220000000                                  | sp Q08AD1 CAMP2_HUMAN |
| 11265 | APSASDSKADSDGAKPEPVAMAR2.02020002E+21                | sp Q7Z4V5 HDGR2_HUMAN |
| 11266 | LLASSPALPSSGAQAR200000000000                         | sp Q9NYZ3 GTSE1_HUMAN |
| 11267 | GLLSDSMTDVPVDTGVAAR200000000000000000                | sp O43399 TPD54_HUMAN |
| 11268 | KAPPPPISPTQLSDVSSPR20020020000                       | sp Q9P0K7 RAI14_HUMAN |
| 11269 | SHSGTSPDNTAPPPPPRPQPSHSR2.022E+23                    | sp Q96D71 REPS1_HUMAN |
| 11270 | KSPAESPSTPR2000000022000                             | sp O76021 RL1D1_HUMAN |
| 11271 | TSPVVAPTSEPSSPLHTQLLK2200000000000000                | sp O75044 SRGP2_HUMAN |
| 11272 | LALPPATKATTSEGGATSPSPSYSPDTPANR2300000000000         | sp P08651 NFIC_HUMAN  |
| 11273 | SRSRTPLLPR20202000000                                | sp Q9UQ35 SRRM2_HUMAN |
| 11274 | SRTPSRHSCSGSSPPR20220000                             | sp Q9UQ35 SRRM2_HUMAN |
| 11275 | HKSGSMEEDVDTSPGGDYTSPSSPTSSSR3000020000000           | sp P08651 NFIC_HUMAN  |
| 11276 | SKSPPKSPPEEGAVSS2000200000000000                     | sp Q01130 SRSF2_HUMAN |
| 11277 | SSSTEPPPPVR22000000000                               | sp Q8N684 CPSF7_HUMAN |

|       |                                                             |    |        |             |
|-------|-------------------------------------------------------------|----|--------|-------------|
| 11278 | RHSSTGDSADAGPPAAGSAR2002000000000000                        | sp | Q6ZU35 | K1211_HUMAN |
| 11279 | ALGVISNFQSSPK2000                                           | sp | O94876 | TMCC1_HUMAN |
| 11280 | DPHSPEDEEQPQGLSDDDILRDSGSDQDLDGAGVR2.0000000002E+32         | sp | Q86VM9 | ZCH18_HUMAN |
| 11281 | IHCGLQDSQK2000                                              | sp | Q07864 | DPOE1_HUMAN |
| 11282 | QPGQVIGATTPSTGSPTNK200000                                   | sp | Q9ULM3 | YETS2_HUMAN |
| 11283 | SMSFQGIR2000000                                             | sp | P15924 | DESP_HUMAN  |
| 11284 | WCFSEPGK200000                                              | sp | Q2M3G4 | SHRM1_HUMAN |
| 11285 | ASEPLLSPPPFGESR2000000000                                   | sp | O14686 | KMT2D_HUMAN |
| 11286 | LQDSSDPDTGSEEEGSSRLSPPHSPR200200000000                      | sp | Q92974 | ARHG2_HUMAN |
| 11287 | EPLENSASESSDELPEKER2020020000000000                         | sp | P78337 | PITX1_HUMAN |
| 11288 | GLVSPQSPQK20000                                             | sp | P41182 | BCL6_HUMAN  |
| 11289 | REEQTDTSDGESVTHHIR2002000000000000                          | sp | P36915 | GNL1_HUMAN  |
| 11290 | AAAYDISEDEED2000000                                         | sp | P49585 | PCY1A_HUMAN |
| 11291 | GPKSDDGFEIVPIEDPAK200000000000000000                        | sp | Q8IY81 | SPB1_HUMAN  |
| 11292 | TYSECEGTYSPEISWHHR200000000000000000                        | sp | P48651 | PTSS1_HUMAN |
| 11293 | SQVNGEAGSYEMTNQHVK200000000000000000                        | sp | Q05D32 | CTSL2_HUMAN |
| 11294 | ARSWSPPEVSR20000000200                                      | sp | Q9NR19 | ACSA_HUMAN  |
| 11295 | METVSNASSSNPSSPGR200200000                                  | sp | Q9NTI5 | PDS5B_HUMAN |
| 11296 | LSSLRASTSK2200020000                                        | sp | P62753 | RS6_HUMAN   |
| 11297 | LKATVTPSPVK200020000                                        | sp | Q9H1E3 | NUCKS_HUMAN |
| 11298 | DGDSYDPYDFSDTEEMPQVHTPK202000100002000                      | sp | P25205 | MCM3_HUMAN  |
| 11299 | MLRPVSR200                                                  | sp | Q5VZK9 | LR16A_HUMAN |
| 11300 | YSPTSPTYSPTSPPK20200000000                                  | sp | P24928 | RPB1_HUMAN  |
| 11301 | LTPVRPAAASPIVSGAR200000000                                  | sp | Q9Y2K7 | KDM2A_HUMAN |
| 11302 | RTPSDDEEDNLFAPPK2000000000000000                            | sp | Q641Q2 | FA21A_HUMAN |
| 11303 | NFYESDDDQKEK200000000                                       | sp | Q9Y4E1 | FA21C_HUMAN |
| 11304 | YPLCSADAAVSTTPPGSPPPPPPLPEPPVLK2.000002E+21                 | sp | O00203 | AP3B1_HUMAN |
| 11305 | EAATQEDPEQLPELEAHGVSESEGEERPVAEEEILLR2020000000000000000000 | sp | Q9BVJ6 | UT14A_HUMAN |
| 11306 | FPEFCSSPSPVEVK20000000                                      | sp | Q68E01 | INT3_HUMAN  |
| 11307 | TAPVASTPSSTPIPALSPPTK200000                                 | sp | Q7Z3K3 | POGZ_HUMAN  |
| 11308 | TIGGGDDSFNTFFSETGAGK20000000000                             | sp | P68363 | TBA1B_HUMAN |
| 11309 | LDSEMDSHSENYDTMSSPLPGK1002000030100000000                   | sp | Q71U36 | TBA1A_HUMAN |
| 11310 | ASPHATPSTLHFPTSPIIQPGPYFSHPAIR20000000000000000000          | sp | Q9BQE3 | TBA1C_HUMAN |
| 11311 | KPISDNSFSSDEEQSTGPIK2002000000000000                        | sp | Q6PEY2 | TBA3E_HUMAN |
| 11312 | TKSSSDLSPPR22020020000                                      | sp | Q13748 | TBA3C_HUMAN |
| 11313 | AISTPETPLTK200200000                                        | sp | Q9NTI5 | PDS5B_HUMAN |
| 11314 | LNETELTDLEGQESPPKNYLCIEEEK2E+21                             | sp | Q12857 | NFIA_HUMAN  |
| 11315 | VSPSTSYTPSR20002000000                                      | sp | O60293 | ZC3H1_HUMAN |
| 11316 | ASHSSERPPPR20020000000                                      | sp | Q9BRD0 | BUD13_HUMAN |
| 11317 | KEKTPATTPEAR2000200000                                      | sp | Q14181 | DPOA2_HUMAN |
| 11318 | LLDRSPSR20000                                               | sp | Q9ULF5 | S39AA_HUMAN |
| 11319 | RRSPADAIPK2000000000                                        | sp | Q9BTE3 | MCMBP_HUMAN |
| 11320 | VAAAAGSGSPSPGSPGHDR2000000                                  | sp | O15027 | SC16A_HUMAN |
| 11321 | QSAGPNSPTGGGGGGSGGTR2000000000000000                        | sp | Q8NI27 | THOC2_HUMAN |
|       |                                                             | sp | O76039 | CDKL5_HUMAN |
|       |                                                             | sp | P18754 | RCC1_HUMAN  |
|       |                                                             | sp | Q9BTU6 | P4K2A_HUMAN |
|       |                                                             | sp | A7E2V4 | ZSWM8_HUMAN |

|       |                                                      |                       |
|-------|------------------------------------------------------|-----------------------|
|       |                                                      | sp Q9TNN7 1C05_HUMAN  |
|       |                                                      | sp P04222 1C03_HUMAN  |
|       |                                                      | sp Q07000 1C15_HUMAN  |
|       |                                                      | sp Q29865 1C18_HUMAN  |
|       |                                                      | sp Q29960 1C16_HUMAN  |
| 11322 | GGSCSQAASSNSAQGSDESLIACK2000000000                   | sp Q29963 1C06_HUMAN  |
|       |                                                      | sp P30504 1C04_HUMAN  |
|       |                                                      | sp P30505 1C08_HUMAN  |
|       |                                                      | sp P30508 1C12_HUMAN  |
|       |                                                      | sp P30510 1C14_HUMAN  |
|       |                                                      | sp Q95604 1C17_HUMAN  |
| 11323 | SVSTSSPAGAAIASTSGASNSSSN200                          | sp Q86UE8 TLK2_HUMAN  |
| 11324 | SDGACDSPSSDKENSSQIAQDHQK2000000000                   | sp Q9UIG0 BAZ1B_HUMAN |
| 11325 | LSPERSSDESSENEPHLPHGVSQR2.0002E+24                   | sp Q9BQ52 RNZ2_HUMAN  |
| 11326 | ALEAASLSQHPPSLCISDSEEEEEER2.00002E+19                | sp O43159 RRP8_HUMAN  |
| 11327 | DGTAPPPQSPGSPGTGQDEEWSDEESPRK2.000002E+21            | sp Q9UKS6 PACN3_HUMAN |
| 11328 | SPSGHPHVR20000000                                    | sp Q8WX93 PALLD_HUMAN |
| 11329 | NYSVGSRPLKPLSPLR200000000020000                      | sp O60825 F262_HUMAN  |
| 11330 | NATQPPNAEEESGSSSASEEEDTKPKPTK2.000000020222E+27      | sp Q68E01 INT3_HUMAN  |
| 11331 | GSGGLFSPSTAHPD GALGQR20000000000000                  | sp Q9C0C2 TB182_HUMAN |
| 11332 | SAYQEYDSDSVPEELKR30002000000000                      | sp Q96JG6 CC132_HUMAN |
| 11333 | RESESEDETTPAAPQLIK202020020000000000                 | sp O60832 DKC1_HUMAN  |
| 11334 | GSSPSIRPIQGSQSSSPVEK200000                           | sp Q92560 BAP1_HUMAN  |
| 11335 | EVVKPVPITSPAVSK20000000                              | sp Q96HC4 PDLI5_HUMAN |
| 11336 | GPSPEGSSSTESSPEHPPK200000000020000000                | sp Q9UQ35 SRRM2_HUMAN |
| 11337 | YRPASVPPSPSLSR20000020000                            | sp P13807 GYS1_HUMAN  |
| 11338 | LLKPGEPESEYTDDEEDTKDHNKQD203000000000000000          | sp O15173 PGRC2_HUMAN |
| 11339 | RSSQPSPTAVPASDSPPTK20000000000000000000              | sp Q3KQU3 MA7D1_HUMAN |
| 11340 | TLSSSAQEDIIR20000000000000                           | sp Q9H788 SH24A_HUMAN |
| 11341 | GPSPEGSSSTESSPEHPPK20002220000000000000              | sp Q9UQ35 SRRM2_HUMAN |
| 11342 | DHNVGSPKSPHTASPHQHTQTEK20000000002000000000          | sp A0JNW5 UH1BL_HUMAN |
| 11343 | SPSPEPIYNSEGK200000000000                            | sp Q15637 SF01_HUMAN  |
| 11344 | SAFTPATATGSSPSPVLGQGEK2020000000000000               | sp Q15811 ITSN1_HUMAN |
| 11345 | GQTPLTEGSEDL DGHSDPEESFAR2.0020000002E+19            | sp Q86VR2 F134C_HUMAN |
| 11346 | SFPLFDNSK2000000000                                  | sp Q5T0W9 FA83B_HUMAN |
| 11347 | NKASPQSEFMPSK200000000000                            | sp Q9NQW6 ANLN_HUMAN  |
| 11348 | QIGGGIQSITYTHNGDISR200                               | sp O00411 RPOM_HUMAN  |
| 11349 | TKSPTDDEVTPSAVVR20000000000000000000                 | sp Q9Y2H5 PKHA6_HUMAN |
| 11350 | EYIPGQPPLSQSSDSSPTR220000                            | sp P07814 SYEP_HUMAN  |
| 11351 | GASSPYGAPGTPR20000002000                             | sp Q5UIP0 RIF1_HUMAN  |
| 11352 | DKDSGSSSPLPK22000000                                 | sp Q86VQ1 GLCI1_HUMAN |
| 11353 | TEMKSPFNPSPPQDSR2000002000                           | sp P08651 NFIC_HUMAN  |
| 11354 | STLESEKPGSPEAAETSPPSNIIDHCEK2E+24                    | sp Q96T23 RSF1_HUMAN  |
| 11355 | EMEHNTVCAAGTSPVGEIGEEK1.0000000002E+21               | sp P18583 SON_HUMAN   |
| 11356 | SSDQDSTNKEAEAAGVKPAGVRPR2.200002E+24                 | sp Q92625 ANS1A_HUMAN |
| 11357 | GHPAQRPEPSPPEPEPQAPEGSQAGAEGPSSPEASRSPAR200002000000 | sp Q6ZW31 SYDE1_HUMAN |
| 11358 | SASLSHPGGEGERPAR2000000000000000                     | sp Q2M3G4 SHRM1_HUMAN |
| 11359 | YHGHSMSDPGVSYR1200000000                             | sp P08559 ODPA_HUMAN  |
|       |                                                      | sp P29803 ODPAT_HUMAN |
| 11360 | VLSGNCNHQEGTSSDDELPSAEMIDFQK2.0000000002E+26         | sp P16383 GCFC2_HUMAN |
| 11361 | SLTELVQQPCPIEASK200000000000000000                   | sp P39880 CUX1_HUMAN  |
| 11362 | RRSPSPYYSR200000000                                  | sp P62995 TRA2B_HUMAN |
|       |                                                      | sp Q13595 TRA2A_HUMAN |

|       |                                                      |                       |
|-------|------------------------------------------------------|-----------------------|
| 11363 | IGSPLSPK2002000                                      | sp Q659C4 LAR1B_HUMAN |
| 11364 | GQSQTSPDHRSDTSSPEVR2200002000000000                  | sp Q9UQ35 SRRM2_HUMAN |
| 11365 | AADPPAENSSAPEAEQGGAE2000000000000                    | sp P67809 YBOX1_HUMAN |
| 11366 | KAEAAAAPTVPAGPAQPGHVSPTPATTSPGEK20200000             | sp Q9Y6R0 NUMBL_HUMAN |
| 11367 | SRSWTSFK2020000                                      | sp 075494 SRS10_HUMAN |
| 11368 | DDATPVRDEPMDAESITFK20000000000000000                 | sp Q7Z6E9 RBBP6_HUMAN |
| 11369 | DRESRSPFLKPDER202000000000                           | sp Q9H7N4 SFR19_HUMAN |
| 11370 | SQGSPEDESAPQASPGPSK2000000000000                     | sp Q9P107 GMIP_HUMAN  |
| 11371 | TPASTPVSQTPQASPMIER20000000002010000                 | sp Q9UHR4 BI2L1_HUMAN |
| 11372 | HGSYEDAVHSGALND2000000000000000                      | sp P17987 TCPA_HUMAN  |
| 11373 | SRSRTPLISR20202000000                                | sp Q9UQ35 SRRM2_HUMAN |
| 11374 | GGAPEGPNEAEVTSGKPEQVDPDAEEKSVSGTDVQEECR2000000000000 | sp P49321 NASP_HUMAN  |
| 11375 | SPASCHEHPMADDPSK20000000000000000                    | sp Q9BXB5 OSB10_HUMAN |
| 11376 | SWDSSSPVDRPEPEEAASPTR22000000000000000               | sp Q86WB0 NIPA_HUMAN  |
| 11377 | GEGDAPFSEPGTTSTQRPSSPETATK2200000000000000           | sp Q9UQ35 SRRM2_HUMAN |
| 11378 | APPPISPTQLSDVSSPR2000020022000                       | sp Q9P0K7 RAI14_HUMAN |
| 11379 | DSGNWDTSGSELSEGELEKR202002000000000                  | sp 075400 PR40A_HUMAN |
| 11380 | SSGHSSSELSPDAVEK20000000020000000                    | sp Q9UQ35 SRRM2_HUMAN |
| 11381 | SRERPSQPEGLR200000000000000                          | sp Q04637 IF4G1_HUMAN |
| 11382 | RSPSPYYSR200000000                                   | sp P62995 TRA2B_HUMAN |
|       |                                                      | sp Q13595 TRA2A_HUMAN |
| 11383 | LPQSSSESSPSPQPTK2022002000000                        | sp Q9UQ35 SRRM2_HUMAN |
| 11384 | AAPAQVRPPSPGNIRPVK2000000000                         | sp Q14244 MAP7_HUMAN  |
| 11385 | SWSLIKNTCPPKDDPQVMEDK200000000010000                 | sp P79522 PRR3_HUMAN  |
| 11386 | VSPPTPAR20000000                                     | sp Q9H7Z6 KAT8_HUMAN  |
| 11387 | SESARGDSEDEVLR20002020000000                         | sp Q8WVC0 LEO1_HUMAN  |
| 11388 | VAEPGAEATSSTGEESGSEHPPAVPMHNK200020200000000000      | sp Q14684 RRP1B_HUMAN |
| 11389 | WSAEASGKPSPSDPGSGTATMMNSSSRGSSPTR11000200220000      | sp Q5JRA6 MIA3_HUMAN  |
| 11390 | ASAGPAPGPVVTAEGLHPSLPSPTGNSTPLGSSK2.0000000002E+33   | sp Q4KMP7 TB10B_HUMAN |
| 11391 | GRLPNSSRPSTPTINVLESK220000000000                     | sp Q15910 EZH2_HUMAN  |
| 11392 | SSGHSSSELSPDAVEK20020000000                          | sp Q9UQ35 SRRM2_HUMAN |
| 11393 | MLDITPGCK200000                                      | sp Q96N23 CFA54_HUMAN |
| 11394 | WSPPQNYK20000000                                     | sp Q96K21 ANCHR_HUMAN |
| 11395 | SSGTNFQGLPSK200000000000                             | sp Q68EM7 RHG17_HUMAN |
| 11396 | SITSPPTSTTK2000000000000                             | sp Q14938 NFIX_HUMAN  |
| 11397 | STSATDTHHVMAR20000000001000                          | sp 014874 BCKD_HUMAN  |
| 11398 | KGSTFRPHDSFVK220000000000                            | sp Q9P206 K1522_HUMAN |
| 11399 | LSSAGPRSPYCK220000000000                             | sp Q6PL18 ATAD2_HUMAN |
| 11400 | VETVSPSESPK200200000                                 | sp Q99590 SCAFB_HUMAN |
| 11401 | STSGRPGCQPSPCVVK20000000000000000                    | sp 014545 TRAD1_HUMAN |
| 11402 | LLSSNPPTSASESARIIGVSHCTQPQVASLSR2.0000002002E+21     | sp Q6ZUF6 NC336_HUMAN |
| 11403 | FHFPPLDTHSPTNDVQGR2000000000000                      | sp P41162 ETV3_HUMAN  |
| 11404 | LTPVSPSSSTEEK200000000000000                         | sp Q13501 SQSTM_HUMAN |
| 11405 | SDGACDSPSSDKENSSQIAQDHQK2000022000000000             | sp Q9UIG0 BAZ1B_HUMAN |
| 11406 | GLPLGSAVSSPVLFPVGR200200000200000                    | sp Q8WUM0 NU133_HUMAN |
| 11407 | SRHSSISPSTLTLK2002202000000000                       | sp Q14004 CDK13_HUMAN |
| 11408 | ATLLNVPDLSDSIHSANASER2E+20                           | sp Q07157 ZO1_HUMAN   |
| 11409 | NSVASPTSPTR20000                                     | sp Q96HB5 CC120_HUMAN |
| 11410 | SQDSYPGSPSLSPR2000                                   | sp Q6VN20 RBP10_HUMAN |
| 11411 | RPSLPSSPSPGLPK2000200000000                          | sp 043294 TGF11_HUMAN |
| 11412 | IPESETESTASAPNSPR20000002000                         | sp Q07889 SOS1_HUMAN  |
| 11413 | SDISDQEEDEESEGCPVSNLSK2.00200000002E+23              | sp Q15154 PCM1_HUMAN  |
| 11414 | RKSHEAEVLK200000000                                  | sp P16949 STMN1_HUMAN |

|       |                                             |           |             |
|-------|---------------------------------------------|-----------|-------------|
| 11415 | KGNSPNSPPTPK20000000                        | sp P48634 | PRC2A_HUMAN |
| 11416 | SILSPGGSCGPIK20020000000000                 | sp P78347 | GTF2I_HUMAN |
| 11417 | STQPDVCASPQEKPLR200000000                   | sp Q3T8J9 | GON4L_HUMAN |
| 11418 | TNLTSQSSTNLPSPGSPGSPGSPGSPGSPK20000000000   | sp Q6IN85 | P4R3A_HUMAN |
| 11419 | SSGHSSSELSPDAVEK22000020020000000           | sp Q9UQ35 | SRRM2_HUMAN |
| 11420 | VEQATKPSFER20000000                         | sp Q96E39 | RMXL1_HUMAN |
| 11421 | EHSYPGSPPLGWPSSETR300200000000000           | sp O15320 | CTGE5_HUMAN |
| 11422 | NKEESSDDEKESSEPPK2200000020000000           | sp P35659 | DEK_HUMAN   |
| 11423 | TTSPEPQESPTLPSTEGQVVK2.000002E+20           | sp P53814 | SMTN_HUMAN  |
| 11424 | TVGALPR20000000                             | sp Q9BSV6 | SEN34_HUMAN |
| 11425 | TPSPGPVESK200000000                         | sp Q5T0W9 | FA83B_HUMAN |
| 11426 | NSSTPGLQVPVSPTVPIQNQK2000000020000000000    | sp Q03164 | KMT2A_HUMAN |
|       |                                             | sp P49792 | RBP2_HUMAN  |
|       |                                             | sp Q7Z3J3 | RGPD4_HUMAN |
| 11427 | EDALDDSVSSSVHASPLASSPVRK2.0200000000002E+19 | sp A6NKT7 | RGPD3_HUMAN |
|       |                                             | sp Q99666 | RGPD5_HUMAN |
|       |                                             | sp O14715 | RGPD8_HUMAN |
| 11428 | KKPEDSPSDDDLIVYELTPTAEQK2000000000000000000 | sp P49792 | RBP2_HUMAN  |
| 11429 | INPPSSGGTSSSPIK200000                       | sp P14859 | PO2F1_HUMAN |
| 11430 | TPSSSPITPPASETK2220002000000000             | sp Q9NZJ0 | DTL_HUMAN   |
| 11431 | EQSTPPKSPQ200002000                         | sp Q92615 | LAR4B_HUMAN |
| 11432 | QRGSETGSETHESDLAPSDK20202000000000000       | sp P48634 | PRC2A_HUMAN |
| 11433 | SRESLNVDVVK200000000                        | sp Q07866 | KLC1_HUMAN  |
| 11434 | SSTVATLQGTDPDHG DPR200000000000000          | sp Q8IVT2 | MISP_HUMAN  |
| 11435 | VKEEPSPPQSPR20000000                        | sp Q00613 | HSF1_HUMAN  |
| 11436 | AELGMDSTSQSPPIK1000020000000                | sp Q9NR19 | ACSA_HUMAN  |
| 11437 | YSPTSPTYSPK30000000002000                   | sp P24928 | RPB1_HUMAN  |
| 11438 | TRSPSPTLGESLAPHK2020000000000               | sp Q86UU1 | PHLB1_HUMAN |
| 11439 | AELGMDSTSQSPPIKR10000002000000              | sp Q9NR19 | ACSA_HUMAN  |
| 11440 | SLSEEKEDHSDGLAGLK20000000000000000          | sp Q6P0Q8 | MAST2_HUMAN |
| 11441 | AASSSPGSPVASSPSR20000000000000000           | sp Q92538 | GBF1_HUMAN  |
| 11442 | EKEEEEEPEGKPSDAESSESDDEK20002202200000      | sp Q9BSC4 | NOL10_HUMAN |
| 11443 | KLSLSEGK2020000                             | sp Q49A26 | GLYR1_HUMAN |
| 11444 | RHSSVSDSQPCEPPSVGTEYSQGASPPQHQLK2.2E+31     | sp P39880 | CUX1_HUMAN  |
| 11445 | THCVGDSQSSASSPPATSK20000000000              | sp Q9H4Z2 | ZN335_HUMAN |
| 11446 | TLSPATAPTSQGIPTSDEESTPKK2000200000          | sp Q9NQS7 | INCE_HUMAN  |
| 11447 | SFNYSNSSTSEVSSTSASK200000000000000          | sp Q5VT52 | RPRD2_HUMAN |
| 11448 | SGTSSPQSPVFR200200000                       | sp Q8N556 | AFAP1_HUMAN |
| 11449 | ESEKLENETLNK2002000000000                   | sp P23588 | IF4B_HUMAN  |
| 11450 | GDTPGHATPGHGATSSAR2000                      | sp O75533 | SF3B1_HUMAN |
| 11451 | SPGRPTQGALGEQQDLSNTTSK2E+22                 | sp P10071 | GLI3_HUMAN  |
| 11452 | LDSQPQETSPELPR2000020000000                 | sp O14545 | TRAD1_HUMAN |
| 11453 | LSGEHSESSTRPR22000000                       | sp Q7Z3K3 | POGZ_HUMAN  |
| 11454 | SHSGTSPDNTAPPPPPRPQPSHSR2E+23               | sp Q96D71 | REPS1_HUMAN |
| 11455 | SPFNPSPPQDSR2000                            | sp P08651 | NFIC_HUMAN  |
| 11456 | SHTPSPTSPK2002000                           | sp P40123 | CAP2_HUMAN  |
| 11457 | STSPAGQHHSPISSR200000002000000              | sp Q5T200 | ZC3HD_HUMAN |
| 11458 | GQSQTSPDHRSDTSSPEVR2022000020000000000      | sp Q9UQ35 | SRRM2_HUMAN |
|       |                                             | sp Q9Y4E1 | FA21C_HUMAN |
| 11459 | SRPTSFADLAAR2000000000                      | sp Q641Q2 | FA21A_HUMAN |
|       |                                             | sp Q5SNT6 | FA21B_HUMAN |
| 11460 | HIVNHDDVFESEELSSDEEMK200002000100           | sp Q96RT1 | LAP2_HUMAN  |
| 11461 | EVLTPSTSDNETR202200000000                   | sp Q70CQ2 | UBP34_HUMAN |
| 11462 | SHSTEPNLSSFLNDPNMK20000000000000100         | sp Q9UPQ0 | LIMC1_HUMAN |



|       |                                                 |                       |
|-------|-------------------------------------------------|-----------------------|
| 11463 | AMSTTSSISSPQPGK10000002000000                   | sp Q9UJU6 DBNL_HUMAN  |
| 11464 | GSVSQPSTSPPKPTGIFQTSANSSFEVK2. 202E+24          | sp O15027 SC16A_HUMAN |
| 11465 | GPAETAAADSEPTDPEEER200020000000                 | sp Q5XUX0 FBX31_HUMAN |
| 11466 | DHSDSDDQMLVAK202000100000                       | sp Q9NW75 GPTC2_HUMAN |
| 11467 | SGEQITSSPVSPK20000200002000                     | sp O43314 VIP2_HUMAN  |
| 11468 | SPHSPSIATPPSQSSSCSDAPMLSTVHSAK2. 002E+31        | sp Q9NYF8 BCLF1_HUMAN |
| 11469 | DSMSCGLDSEGATPPPVGRLR2000000000                 | sp Q99956 DUS9_HUMAN  |
| 11470 | MSSPPSPQK200020000                              | sp Q9Y2H6 FND3A_HUMAN |
| 11471 | YFQSPSRSR2020200                                | sp Q16629 SRSF7_HUMAN |
| 11472 | STSAPQMSPGSSDNQSSSPQPAQK1. 200220002E+19        | sp Q14157 UBP2L_HUMAN |
| 11473 | TGSNISGASSDISLDEQYKHQLEETKK2. 0020022E+25       | sp P22059 OSBP1_HUMAN |
| 11474 | AVSLDSPVSVGSSPPVK2000000000200000               | sp Q9Y6Q9 NCOA3_HUMAN |
| 11475 | IDAGTMAEPSASPSK10002000000                      | sp Q8IXQ3 CI040_HUMAN |
| 11476 | QEASTGQSPEDHASLAPPLSPDHSSLEAK200000200000000000 | sp P48681 NEST_HUMAN  |
| 11477 | SSTDLSLPGISR2200000000000                       | sp Q9HCD5 NCOA5_HUMAN |
| 11478 | SPPRPPR20000000                                 | sp Q9UQ88 CD11A_HUMAN |
|       |                                                 | sp P21127 CD11B_HUMAN |
|       |                                                 | sp Q9UKB5 AJAP1_HUMAN |
| 11479 | SLRSPLPSR202000000                              | sp Q9NYV4 CDK12_HUMAN |
| 11480 | GAAAADLLSSSPESQHGGTQSPGGGQPLLQPTK20000000000000 | sp Q9H3S7 PTN23_HUMAN |
| 11481 | GRPSKTPSPSQPK20202000000                        | sp Q9NTI5 PDS5B_HUMAN |
| 11482 | LNNSSPNSSGGVK2000000000                         | sp O00472 ELL2_HUMAN  |
| 11483 | SRKSPSPAGGGSSPYSR202000002000000                | sp Q14004 CDK13_HUMAN |
| 11484 | RASSPSLIER200200000                             | sp A1L170 CA226_HUMAN |
| 11485 | FDHESPGTDEDKSG220020000000                      | sp Q13427 PPIG_HUMAN  |
| 11486 | KERPISMINASNYNVTSDYAVHPMPVGR1. 00000000022E+24  | sp Q9HAU0 PKHA5_HUMAN |
| 11487 | SVVSFDK20020000                                 | sp Q15424 SAFB1_HUMAN |
| 11488 | SQDSYPGSPSLSPR230020002000                      | sp Q6VN20 RBP10_HUMAN |
| 11489 | RSSQPSPTAVPASDSPPTK202000020000000              | sp Q3KQU3 MA7D1_HUMAN |
| 11490 | RASPPPK200000                                   | sp Q8IYB3 SRRM1_HUMAN |
| 11491 | LSGEHSESSTPRPR20000000200000                    | sp Q7Z3K3 POGZ_HUMAN  |
| 11492 | QQSLGGSESPGAPCSPGLSASPASSPGR2E+27               | sp Q8N612 F16A2_HUMAN |
| 11493 | ALFKPPEDSQDDESDSDAEEEEQTTKR20000202000000000000 | sp Q13769 THOC5_HUMAN |
| 11494 | QPSPSPPTER2000002000                            | sp P29590 PML_HUMAN   |
| 11495 | SAGGSPEGGEDSDREDGNYCPPVK2E+21                   | sp Q9H6Z4 RANB3_HUMAN |
| 11496 | AGSSPAQGAQNEPPR2000000000000                    | sp Q9UGU0 TCF20_HUMAN |
| 11497 | ALSSAVQASPTSPGGSPSSPSSGQR2200000000000000       | sp Q03164 KMT2A_HUMAN |
| 11498 | RRSPSPYYSR200000200                             | sp Q13595 TRA2A_HUMAN |
|       |                                                 | sp P62995 TRA2B_HUMAN |
| 11499 | VIEPPAASCSSPR20002000                           | sp Q3MIN7 RGL3_HUMAN  |
| 11500 | APSASDSKADSDGAKPEPVAMAR2. 0202020002E+23        | sp Q7Z4V5 HDGR2_HUMAN |
| 11501 | APSASDSKADSDGAKPEPVAMAR2. 0202020002E+23        | sp Q7Z4V5 HDGR2_HUMAN |
| 11502 | RGEDAPFSEPGTTSTQRPSPETATK20000000000000         | sp Q9UQ35 SRRM2_HUMAN |
| 11503 | SKSSDPDLR2020000000                             | sp O60293 ZC3H1_HUMAN |
| 11504 | EGPLGWSSDGLGSLVLLDSPSSPR2000                    | sp Q9UGP4 LIMD1_HUMAN |
| 11505 | NSVLSDPGLDSPRTSPVIMAR200000000200000000         | sp O15085 ARHGB_HUMAN |
| 11506 | SNSQSDSHDEEVSTPPNPVK2. 02E+20                   | sp P31321 KAP1_HUMAN  |
| 11507 | LLSFSPEEFPTLK2000000000                         | sp Q5JSZ5 PRC2B_HUMAN |
| 11508 | VAEPGAEATSSTGEESGSEHPPAVPMHNK2000000000000      | sp Q14684 RRP1B_HUMAN |

|       |                                                |                       |
|-------|------------------------------------------------|-----------------------|
|       |                                                | sp P30504 1C04_HUMAN  |
|       |                                                | sp Q9TNN7 1C05_HUMAN  |
|       |                                                | sp P04222 1C03_HUMAN  |
|       |                                                | sp Q07000 1C15_HUMAN  |
|       |                                                | sp Q29865 1C18_HUMAN  |
| 11509 | GGSCSQAASSNSAQGSDESLIACK2000000000000000       | sp Q29960 1C16_HUMAN  |
|       |                                                | sp Q29963 1C06_HUMAN  |
|       |                                                | sp P30505 1C08_HUMAN  |
|       |                                                | sp P30508 1C12_HUMAN  |
|       |                                                | sp P30510 1C14_HUMAN  |
|       |                                                | sp Q95604 1C17_HUMAN  |
| 11510 | SDSIRPALNSPVERPSSDQEEGETSAQTER2000000000000000 | sp Q9UKV5 AMFR_HUMAN  |
| 11511 | SSPSKENESSDSEEEVSRPR2000022020000000000        | sp Q6KC79 NIPBL_HUMAN |
| 11512 | SPSGSAFGSQENLR2000000000000000                 | sp Q96N67 DOCK7_HUMAN |
| 11513 | GGPASVPSSPGTSVK2000000000                      | sp O43237 DC1L2_HUMAN |
| 11514 | SKSPPKSP EEGAVSS200000200000000000             | sp Q01130 SRSF2_HUMAN |
| 11515 | ELSNSPLRENSFGSPLEFR20000020000000000           | sp Q9UQ35 SRRM2_HUMAN |
| 11516 | ATSPSSVSGDFDDGHHSVSTPGPSR2. 2202E+22           | sp Q86U86 PB1_HUMAN   |
| 11517 | QLQAPAGSPAPSPSPGGDDKPQVPPR2. 000002E+19        | sp Q07912 ACK1_HUMAN  |
| 11518 | GESAPTLSTSPSPSSPSPTSPSPTLGR2. 2E+20            | sp Q9H330 TM245_HUMAN |
| 11519 | LGSTGSQPNSEAESVPENVPKPLLPPK2E+23               | sp Q8IZ21 PHAR4_HUMAN |
| 11520 | LPASPSGSEDLSSVSSSPTSSPK202000000000            | sp Q9P2N6 KANL3_HUMAN |
| 11521 | EYSPPPSPPLR30000020000                         | sp Q9HCD6 TANC2_HUMAN |
| 11522 | SPQRSPLQSAESSPTAGK2000000000002020000          | sp Q8IWB9 TEX2_HUMAN  |
| 11523 | SGTTPRQGSITSPQANEQSVTPQRR202200000020000000    | sp Q9UQ35 SRRM2_HUMAN |
| 11524 | SHSESASPSALSSSPNNLSPTGWSQPK2. 002E+19          | sp P04049 RAF1_HUMAN  |
| 11525 | SQSSEGVSLSLSSPSNSLETQSQLSR200000000000000000   | sp O95155 UBE4B_HUMAN |
| 11526 | LPSKELPDSSSPVANNIR20000000000                  | sp Q9BWT3 PAPOG_HUMAN |
| 11527 | YSPSPPK300200000                               | sp Q8IYB3 SRRM1_HUMAN |
| 11528 | SQSIEQESQEK2000000000                          | sp Q5VTL8 PR38B_HUMAN |
| 11529 | DDQVGWSSPPPR200000                             | sp P17927 CR1_HUMAN   |
| 11530 | SGSNTGLDYIK2000000000                          | sp P35367 HRH1_HUMAN  |
| 11531 | HVTLGPGQSPLSR200000                            | sp O15061 SYNEM_HUMAN |
| 11532 | TKSSSDLSPPRR220000200000                       | sp Q9BRD0 BUD13_HUMAN |
| 11533 | TSPTTPEASATNSPCTSKPATPAPSEK202000000000000000  | sp Q12873 CHD3_HUMAN  |
| 11534 | YIASVQGSTPSPR202000                            | sp P49792 RBP2_HUMAN  |
| 11535 | KIPLKPSPSK20000                                | sp Q99755 PI51A_HUMAN |
|       |                                                | sp A2A3N6 PIPSL_HUMAN |
| 11536 | TDTPSSVPTSVISTPSTEEIQSETPGDAQGSPPELK2000000    | sp Q13112 CAF1B_HUMAN |
| 11537 | VSPGLPSPNLENGAPAVGPVQPR2. 00002E+22            | sp Q9UGP4 LIMD1_HUMAN |
| 11538 | HADHSSLTLGSGSSTTR200                           | sp Q7Z6Z7 HUWE1_HUMAN |
| 11539 | QSPGHQSPLASPK2000000002000                     | sp Q8N1G0 ZN687_HUMAN |
| 11540 | TSLPCIPR20000000                               | sp Q14432 PDE3A_HUMAN |
| 11541 | YSPTSPTYSPVYPTSPK2000                          | sp P24928 RPB1_HUMAN  |
| 11542 | VTSSMSSPMQPK20000000                           | sp Q13136 LIPA1_HUMAN |
| 11543 | STSAPQMSPGSSDNQSSSPQPAQQK2. 00012E+23          | sp Q14157 UBP2L_HUMAN |
| 11544 | ALLSSPEGEEK220000000                           | sp O75592 MYCB2_HUMAN |
| 11545 | RTTSPSPEPDR2000000000                          | sp Q9NQ75 CASS4_HUMAN |
| 11546 | GYSSPEPDIQDSSGSEAQSVKPTR2202000000000000       | sp Q9BZF1 OSBL8_HUMAN |
| 11547 | CVSPIVPSPTS200000                              | sp Q86TC9 MYPN_HUMAN  |
| 11548 | APQTSSPPVVR2200000000                          | sp Q8IYB3 SRRM1_HUMAN |
| 11549 | TEFLHSQNSLSPR200002000                         | sp Q96FS4 SIPA1_HUMAN |
| 11550 | ALQESATGQPEPTSSPDNKPFK2000000000               | sp Q15911 ZFH3_HUMAN  |
| 11551 | TPQSPTLPPAK200000000000                        | sp P78310 CXAR_HUMAN  |

|       |                                               |                       |
|-------|-----------------------------------------------|-----------------------|
| 11552 | QFPPSPSAPK2000000                             | sp 075381 PEX14_HUMAN |
| 11553 | LEAIITPPPAK2000000                            | sp 075367 H2AY_HUMAN  |
| 11554 | IFSNQPDSPIASQDK2000000000                     | sp 075161 NPHP4_HUMAN |
| 11555 | DTPGHGSGWAETPR20000200000000                  | sp 075533 SF3B1_HUMAN |
| 11556 | EVNSCTTGSSNSTIIGSQGSETPK2.022E+21             | sp Q5T0W9 FA83B_HUMAN |
| 11557 | HLSLDDIR2000000                               | sp Q96NE9 FRMD6_HUMAN |
| 11558 | ALQHTESPSETNKPHSK200000000000                 | sp Q14669 TRIPC_HUMAN |
| 11559 | KVVVSPTK200                                   | sp P19338 NUCL_HUMAN  |
| 11560 | SASPYPSHLSLSPQR2020002000000000               | sp Q5T200 ZC3HD_HUMAN |
| 11561 | EEASLLSHSPGTSNQSQPCSPKPIR2002000000000000000  | sp Q9H4Z3 PCIF1_HUMAN |
| 11562 | TSPTTPEASATNSPCTSKPATPAPSEK2E+26              | sp Q12873 CHD3_HUMAN  |
| 11563 | DLLHSEGENEGPVSSSSDCR2002000000000000000       | sp Q9NY27 PP4R2_HUMAN |
| 11564 | TASISSPSEGTPTVGSYGCTPQLPK2.022E+25            | sp Q6PKG0 LARP1_HUMAN |
| 11565 | RTSADVEIR200000000                            | sp Q6ZRS2 SRCAP_HUMAN |
| 11566 | ELPAAAAIGATSLVAAPHSSSSSPSK20000               | sp Q14C86 GAPD1_HUMAN |
| 11567 | VVLGDGVQLPPGDYSTTPGGTLFSTTPGGTR22000000       | sp Q13541 4EBP1_HUMAN |
| 11568 | RSSSSSAAASTPPGPPAPADPLGYLPLHGGYQYK2.20002E+31 | sp Q8NDT2 RB15B_HUMAN |
| 11569 | GQSQTSPDHRSDTSSPEVR200002020000000            | sp Q9UQ35 SRRM2_HUMAN |
| 11570 | GSISTPNSPVK20000                              | sp Q96AY4 TTC28_HUMAN |
| 11571 | SLGGESSGGTTPVGSFHTEAAR2000000000000           | sp O15085 ARHGB_HUMAN |
| 11572 | GHLRPEAQLSPYTTSANR2000000000                  | sp O94776 MTA2_HUMAN  |
| 11573 | SQIDVALSQDSTYQGER20000000000                  | sp Q92900 RENT1_HUMAN |
| 11574 | APKPPTDGSTPTSTPSEDQEALGK200000000000          | sp Q8NHM5 KDM2B_HUMAN |
| 11575 | DGYGGSRDSYSSSR2000000                         | sp P38159 RBMX_HUMAN  |
| 11576 | VKDEFSDLSEGDVLESEENDKK200200000200000000      | sp Q96E39 RMXL1_HUMAN |
| 11577 | SPGAPCQECSR200000000000                       | sp Q8N554 ZN276_HUMAN |
| 11578 | SRYSRSPYSR20200000                            | sp Q9NWF9 RN216_HUMAN |
| 11579 | MSCFSRSPMSPTPLDR2002000200000                 | sp Q9BRL6 SRSF8_HUMAN |
| 11580 | SPSVPKSPTPK2000002000                         | sp Q9UQ35 SRRM2_HUMAN |
| 11581 | GSDHSSDKSPSTPEQGVQR200000000000               | sp Q9NVD7 PARVA_HUMAN |
| 11582 | FAFSPLEEEEEDEQKEPMLK2000000000000000          | sp Q3KR37 GRM1B_HUMAN |
| 11583 | IEEVLSPEGSPSKSPSK2000002020000                | sp Q8NBN3 TM87A_HUMAN |
| 11584 | EAAFSPGQQDWSR2000000000                       | sp Q9UEY8 ADDG_HUMAN  |
| 11585 | VEEESTGDPFGFDSDESPLVSSK2E+19                  | sp Q9C0C2 TB182_HUMAN |
| 11586 | AFGESSTESDEEEEGCGHHCVR2.202E+19               | sp Q7Z5K2 WAPL_HUMAN  |
| 11587 | FSDSEDEAATVPGNEPTASTPK2.000002E+20            | sp O60927 PP1RB_HUMAN |
| 11588 | ASSPELPSVENIK20000000000000                   | sp Q8N1G1 REXO1_HUMAN |
| 11589 | DIPRTPSR20000                                 | sp Q969R5 LMBL2_HUMAN |
| 11590 | GGIPASPIDPFQSR2000000000                      | sp Q9UQ35 SRRM2_HUMAN |
| 11591 | LPISDPPDTQEIHVIEQEK200000000000000000         | sp Q96LD4 TRI47_HUMAN |
| 11592 | ESSPIPSPTSDRK200000020000                     | sp Q8WYP5 ELYS_HUMAN  |
| 11593 | APPPPISPTQLSDVSSPR2000020002000               | sp Q01082 SPTB2_HUMAN |
| 11594 | NACILQASGSPPAKSPTDPK20000002000000            | sp Q9P0K7 RAI14_HUMAN |
| 11595 | DFQDYMEPEEGCQGSPQRR100000000200000            | sp P41182 BCL6_HUMAN  |
| 11596 | KSSPSKENESSDSEEEVSRPR2.02000022E+19           | sp O43237 DC1L2_HUMAN |
| 11597 | IHSPIDMSK200001000                            | sp Q6KC79 NIPBL_HUMAN |
| 11598 | ELEDSPQENVSVTEIIKPCDDPK2E+19                  | sp Q6NZY4 ZCHC8_HUMAN |
| 11599 | RRSPSPYYSR200030000                           | sp Q5F1R6 DJC21_HUMAN |
| 11600 | SAPASPNHAGVLSAHSSGAQTPELSR2.0002E+27          | sp Q13595 TRA2A_HUMAN |
| 11601 | KVEGNFNPFAFPK20000                            | sp P62995 TRA2B_HUMAN |
| 11602 | DLPDGHAASPR2000                               | sp Q01167 FOXK2_HUMAN |
| 11603 | DRTPELLYR20000000                             | sp Q9H6K1 CF106_HUMAN |
|       |                                               | sp Q9P1Y5 CAMP3_HUMAN |
|       |                                               | sp Q96T37 RBM15_HUMAN |

|       |                                                    |                       |
|-------|----------------------------------------------------|-----------------------|
| 11604 | YETPSDAIEVISPASSAPPQEK2.0000000002E+19             | sp 075376 NCOR1_HUMAN |
| 11605 | LITSEERSPAK20000                                   | sp Q12888 TP53B_HUMAN |
| 11606 | LPDGPTGSSEEEEFLEIPPFNK20020000000000000000         | sp Q12888 TP53B_HUMAN |
| 11607 | DEDEDEDESSEEDSEDEEPPPK2200020000000000             | sp Q5SSJ5 HP1B3_HUMAN |
| 11608 | SPSPSPTPEAK2000000000                              | sp Q8TAQ2 SMRC2_HUMAN |
| 11609 | NSNSPPSPSSMNQR20200002000000                       | sp Q7Z5L9 I2BP2_HUMAN |
| 11610 | RGPSLGASSHQHSR200020000000                         | sp P49450 CENPA_HUMAN |
| 11611 | EYGSPLK20000                                       | sp P21127 CD11B_HUMAN |
|       |                                                    | sp Q9UQ88 CD11A_HUMAN |
| 11612 | DAQRLSPIPEEVPK2000000000                           | sp Q96T23 RSF1_HUMAN  |
| 11613 | LSSPA AFLPACNSPSK200                               | sp Q86YS7 C2CD5_HUMAN |
| 11614 | SRSYTPEYR20200000                                  | sp Q13595 TRA2A_HUMAN |
| 11615 | DIEISTEEEEK2200000                                 | sp Q4G0J3 LARP7_HUMAN |
|       |                                                    | sp P49792 RBP2_HUMAN  |
|       |                                                    | sp Q7Z3J3 RGPD4_HUMAN |
| 11616 | EDALDDSVSSSVHASPLASSPVR20002000200000              | sp A6NKT7 RGPD3_HUMAN |
|       |                                                    | sp O14715 RGPD8_HUMAN |
|       |                                                    | sp Q99666 RGPD5_HUMAN |
| 11617 | RGSQNSSEHRPPASSTSEDVKASPSSANK2E+27                 | sp O15014 ZN609_HUMAN |
| 11618 | ASSASVPAVGASAEGTR20000000000000000000              | sp Q9BZ23 PANK2_HUMAN |
| 11619 | SRPTSEGS DIESTEPQK20000000000000000000             | sp Q4G0J3 LARP7_HUMAN |
| 11620 | SSTPLHSPSPIR200002020000                           | sp O95817 BAG3_HUMAN  |
| 11621 | EAATQEDPEQLPELEAHGVSESEGEERPVAEEEEILLR2E+34        | sp Q9BVJ6 UT14A_HUMAN |
| 11622 | SDDSKSSPELVTHLK220000000000                        | sp Q07960 RHG01_HUMAN |
| 11623 | SSSISEEKGSDDEKPR2000002000000000                   | sp Q9UKV3 ACINU_HUMAN |
| 11624 | HLSESSGKPLSTK2000000000                            | sp Q8IVT2 MISP_HUMAN  |
| 11625 | SRSHSPMSNR202000000                                | sp Q13595 TRA2A_HUMAN |
| 11626 | NDHLTSTSSPGVIVPESENK2000000000000000               | sp O75496 GEMI_HUMAN  |
| 11627 | DMDESPVPNVVEVTLPK10002000000000000000              | sp Q8TAQ2 SMRC2_HUMAN |
| 11628 | LLSSNEDDANILSSPTDR2000000000002000                 | sp O75448 MED24_HUMAN |
| 11629 | LSPSPSLR20200000                                   | sp Q5T200 ZC3HD_HUMAN |
| 11630 | SGSYSGRSPSPYGR300020200000                         | sp Q9NYV4 CDK12_HUMAN |
| 11631 | WGQPPSPTPVPRPPDADPNTPSPKLEGRPER2.0000000000002E+27 | sp Q14839 CHD4_HUMAN  |
| 11632 | KFSAGGSDPPLK2000000                                | sp O75152 ZC11A_HUMAN |
| 11633 | KSPTMEQAVQTASAHLPAPAAVGR2E+23                      | sp Q8ND56 LS14A_HUMAN |
| 11634 | NVSSFPDDATSPLQENR20000000000000000000              | sp P52292 IMA1_HUMAN  |
| 11635 | NEMFESEWSKER10000020000                            | sp Q5VVM6 CCD30_HUMAN |
| 11636 | RESPSPAPKPR20000000                                | sp Q8IYB3 SRRM1_HUMAN |
| 11637 | HTSCSSAGNDSKPVQEAPSVAR20000000000000000000         | sp Q9P246 STIM2_HUMAN |
| 11638 | LPPPPGSPGLHSPTASPPPTAR20000000020000000            | sp O95785 WIZ_HUMAN   |
| 11639 | ASPGTPLSPGLR2002000000                             | sp Q96BD0 SO4A1_HUMAN |
| 11640 | SPSEESAPTTSPESVSGVPSSGSSGR2020000000000000         | sp P54725 RD23A_HUMAN |
| 11641 | KPSPSESPKPFPAVSPPEPR20000000000000000000           | sp Q96JM3 CHAP1_HUMAN |
| 11642 | DSFIENSSSNTSGSSKPNSPSISPSILSNTEHK2.000202E+19      | sp Q99700 ATX2_HUMAN  |
| 11643 | VAEPGAEATSSSTGEESGSEHPPAVPMHMK2020000000000000     | sp Q14684 RRP1B_HUMAN |
| 11644 | LVVSSPTSPK20002000                                 | sp Q9Y4G2 PKHM1_HUMAN |
| 11645 | SCDELSPVSPQGGYPSEPTR20200000000000000000           | sp Q9HCD6 TANC2_HUMAN |
| 11646 | ISDSESEDPPRNQASDSENEELPKPR2.0202000000002E+25      | sp Q96ST2 IWS1_HUMAN  |
| 11647 | KADSDSEDKGEESKPK2020000000000000                   | sp P83916 CBX1_HUMAN  |
| 11648 | RTSVSPPEQPYPYR2000200000000000                     | sp Q8TEH3 DEN1A_HUMAN |
| 11649 | SQGDEAGGHGEDRPEPLSPK2E+20                          | sp Q9NZT2 OGFR_HUMAN  |
| 11650 | TPSRHSCSGSSPPR200000000220000                      | sp Q9UQ35 SRRM2_HUMAN |

|       |                                                   |                       |
|-------|---------------------------------------------------|-----------------------|
| 11651 | HIEPELAGRDSPIR20000                               | sp P86790 CCZ1B_HUMAN |
|       |                                                   | sp P86791 CCZ1_HUMAN  |
| 11652 | ESMCSTPAFPVSPETPYVK200000000                      | sp Q68CZ2 TENS3_HUMAN |
| 11653 | VRPSSDLNSTGQSPHHK200000000200000                  | sp P27448 MARK3_HUMAN |
| 11654 | WGQPPSPTPVPRPPDADPNTSPKPLEGRPER2.000000000002E+25 | sp Q14839 CHD4_HUMAN  |
| 11655 | IEIPVTPTGQSVSPSPSIPGTPTLK2200000000000            | sp Q9H4Z3 PCIF1_HUMAN |
| 11656 | HRSPPATPPPK2000000000                             | sp Q8IYB3 SRRM1_HUMAN |
| 11657 | VVPGQFDDADSSDSEN2020000                           | sp Q9BRS2 RIOK1_HUMAN |
| 11658 | YRPASVPPSPSLSR200000000200                        | sp P13807 GYS1_HUMAN  |
| 11659 | IPVSPEQAR2000000                                  | sp Q9H981 ARP8_HUMAN  |
| 11660 | KGTTPPRSPEASPK200000002000                        | sp Q9HDC5 JPH1_HUMAN  |
| 11661 | AVTPVSQGSNSSSADPK200000000000000                  | sp 000512 BCL9_HUMAN  |
| 11662 | KVSSSSPQSGCPSPTIPAGK2200000000002000000           | sp Q76L83 ASXL2_HUMAN |
| 11663 | SPIALPVK200000000                                 | sp Q8TF01 PNISR_HUMAN |
| 11664 | LQQQHSEQPPLQSPVMTR2001000                         | sp Q5JTV8 TOIP1_HUMAN |
| 11665 | FKSDSGSLGDAK20000000000                           | sp Q5T5U3 RHG21_HUMAN |
| 11666 | SRSPDIQAK2020000000                               | sp Q9HCS5 E41LA_HUMAN |
| 11667 | SRSGSQELDVKPSASPQER2.00022E+20                    | sp Q9UQ35 SRRM2_HUMAN |
| 11668 | RNSVTPLASPEPTKKPR2000002000000000                 | sp Q16875 F263_HUMAN  |
| 11669 | APSDSSLGTPSDGRPELR200000000                       | sp Q15642 CIP4_HUMAN  |
| 11670 | TPSPSYQR200020000                                 | sp Q5T200 ZC3HD_HUMAN |
| 11671 | EPSVPASCAVSATYERSPSPAHLRDDPK3000020000000000      | sp Q92615 LAR4B_HUMAN |
| 11672 | SELESGKFLPR200020000000                           | sp Q92628 K0232_HUMAN |
| 11673 | FYDLSDSNLSGEDSK30000200002000000                  | sp Q9H501 ESF1_HUMAN  |
| 11674 | RASLSEIGFGK20000000                               | sp Q00537 CDK17_HUMAN |
| 11675 | NSDRSEDGYHSDGDYGEHDYR200030200000000000           | sp P52756 RBM5_HUMAN  |
| 11676 | SESFSEDLIPSR200000000000                          | sp Q9P219 DAPLE_HUMAN |
| 11677 | DYPLTPPPSPTVDEPK2000200000000                     | sp Q5THJ4 VP13D_HUMAN |
| 11678 | YGSFEEAEASYPILNR200000000000000                   | sp 095425 SVIL_HUMAN  |
| 11679 | AALLAQYADVTDDEDEADEKDDSGATTMNIGSDK2E+24           | sp Q96MW1 CCD43_HUMAN |
| 11680 | VQRPEDASGGSSPSGTSK20000000                        | sp Q9UI08 EVL_HUMAN   |
| 11681 | NMVDLVNTHHLHSSSDEDDRLK2000000000                  | sp Q9UPN7 PP6R1_HUMAN |
| 11682 | IEEVLSPEGSPSKSPSK2000000020000                    | sp Q9UEY8 ADDG_HUMAN  |
| 11683 | RSLSGSSPCPK2200000                                | sp Q9UQ35 SRRM2_HUMAN |
| 11684 | VSEEQTPPSPAGAGMSTAMGR10201000                     | sp Q16666 IF16_HUMAN  |
| 11685 | SAGGSSPEGGEDSDREDGNYPVVKR2.2E+22                  | sp Q9H6Z4 RANB3_HUMAN |
| 11686 | TPESQPDTPPGTPLVSQDEK2000000000                    | sp Q96T60 PNKP_HUMAN  |
| 11687 | GMGPGTPAGYGR20000000                              | sp P23246 SFPQ_HUMAN  |
| 11688 | SSTPSSPTGTSSSDSGHHIGWGER2E+20                     | sp P46019 KPB2_HUMAN  |
| 11689 | SRSPQRPGWSR202000000000                           | sp Q9UQ35 SRRM2_HUMAN |
| 11690 | SLSELESK20000000                                  | sp P22059 OSBP1_HUMAN |
| 11691 | VASPSQGVGSSSPKR200000000200000                    | sp Q99569 PKP4_HUMAN  |
| 11692 | SPSTLLPK200000000                                 | sp P27816 MAP4_HUMAN  |
| 11693 | INHSSSLAR200000                                   | sp 094915 FRYL_HUMAN  |
| 11694 | GESAPTLSTSPSPSSPSPTSPSPTLGR2E+25                  | sp Q9H330 TM245_HUMAN |
| 11695 | RHSHSHSPMSTR20202002000                           | sp P62995 TRA2B_HUMAN |
| 11696 | NMVDLVNTHHLHSSSDEDDR2220000000                    | sp Q9UPN7 PP6R1_HUMAN |
| 11697 | SRSPSHRTRPR20200000000                            | sp Q8IYB3 SRRM1_HUMAN |
| 11698 | ALEYSNGIFDCQSPSPFMGSLR2.00000000002E+19           | sp Q86W92 LIPB1_HUMAN |
| 11699 | SRESLNVDVVK200200000000                           | sp Q07866 KLC1_HUMAN  |
| 11700 | SRSSSVGSSSYPISPAISR223002000000                   | sp Q15149 PLEC_HUMAN  |
|       |                                                   | sp Q96HA1 P121A_HUMAN |
| 11701 | SQTPERPAK2020000000                               | sp A8CG34 P121C_HUMAN |
|       |                                                   | sp A6NF01 P121B_HUMAN |

|       |                                                   |                       |
|-------|---------------------------------------------------|-----------------------|
| 11702 | QVVSVVQDEEVGLPFEASPESPPPASPDPGVTEIR2E+31          | sp Q96TA1 NIBL1_HUMAN |
| 11703 | KTTEMQSPMQPVDQASLPGHCR2. 201E+21                  | sp P01589 IL2RA_HUMAN |
| 11704 | MSQPGSPSPKTPPTSTPGDTQPNTPAPVPPAEDGIK2. 02E+31     | sp Q14839 CHD4_HUMAN  |
| 11705 | TDSEKPFRRSQSPK2000000200000                       | sp Q9Y2W1 TR150_HUMAN |
| 11706 | ALPTSKPEGLHSSPVGPSSSK20020000000000               | sp Q9UPT8 ZC3H4_HUMAN |
| 11707 | TSPTPPESATTVK20000000000000                       | sp Q5M775 CYTSB_HUMAN |
| 11708 | VPPAPVPCPPSPGPSAVPSSPK20000                       | sp O95817 BAG3_HUMAN  |
| 11709 | RGTSPRPPEGGLGYSQLGDDDLK2. 000000000002E+21        | sp P21127 CD11B_HUMAN |
| 11710 | SPSRPILDGK200000000                               | sp Q9UQ88 CD11A_HUMAN |
| 11711 | SVCPGGSSPGSSSGGR200000200000                      | sp O60890 OPHN1_HUMAN |
| 11712 | RESESEDETPPAAPQLIKK2020000000000000               | sp Q53LP3 SWAHC_HUMAN |
| 11713 | AFQLEEGEETPDCK2000000                             | sp O60832 DKC1_HUMAN  |
| 11714 | RRSPSPKPTK202000000                               | sp P38432 COIL_HUMAN  |
| 11715 | SPPRPQR200000000                                  | sp Q15287 RNPS1_HUMAN |
| 11716 | SLSYSPVER20000000                                 | sp Q6PJG9 LRFN4_HUMAN |
| 11717 | SVASNQSEMEFSSLQDMPK20000000000000                 | sp Q9UQ35 SRRM2_HUMAN |
| 11718 | SCTPSPDQISHRASLEDAPVDDLTR2. 020200002E+25         | sp Q8N163 CCAR2_HUMAN |
| 11719 | APGTPHSHTKPYVR200200000000                        | sp Q7Z2W4 ZCCHV_HUMAN |
| 11720 | RGSPSAAFTFPDTPDDFGK20000000000000                 | sp Q07020 RL18_HUMAN  |
| 11721 | SDSDYDLSPK200000000                               | sp Q9ULT0 TTC7A_HUMAN |
| 11722 | SRSPEAGFCVYLK2020000000000000                     | sp Q08499 PDE4D_HUMAN |
| 11723 | NSFSEIRIHPLSQASGGSSNIRQEPAPK2. 0200000002002E+27  | sp Q07343 PDE4B_HUMAN |
| 11724 | TATPPGYKPGSPSFR200000002000000                    | sp Q9NTZ6 RBM12_HUMAN |
| 11725 | ATGPPSQNSNIGTGRGSEGDCSPEDKNSVTAK20000200000000000 | sp O76039 CDKL5_HUMAN |
| 11726 | SQGEEEGPLSDK20000000000000                        | sp P54259 ATN1_HUMAN  |
| 11727 | MAESPCSPSQPPSPSPDEL PANVK1. 00000002E+27          | sp Q9UKJ3 GPTC8_HUMAN |
| 11728 | SSTPLHSPSPIR20002020000                           | sp Q9H063 MAF1_HUMAN  |
| 11729 | EGSPANWK2000000                                   | sp Q14160 SCRIB_HUMAN |
| 11730 | VSSPVFGATSSIK200000000000                         | sp O95817 BAG3_HUMAN  |
| 11731 | RPPGPTTSPASTSLSPGQR2000000002200000               | sp O96019 ACL6A_HUMAN |
| 11732 | GILAADESTGSIK2000000                              | sp Q99708 COM1_HUMAN  |
| 11733 | ATSPSSVSGDFDDGHHSVSTPGPSR2. 02E+20                | sp Q01970 PLCB3_HUMAN |
| 11734 | FHSPSTWSPNKDTPQEK2020000000000000                 | sp ALDOA_RABIT        |
| 11735 | SLDGAEFRPASVSENHDAGPDGDKR2. 000000000002E+26      | sp P04075 ALDOA_HUMAN |
| 11736 | SRSPPVSK20000200                                  | sp Q86U86 PB1_HUMAN   |
| 11737 | RREEGPPSPDPGASSDAEPEPPSGR200000000000             | sp Q99590 SCAFB_HUMAN |
| 11738 | TPLSFTNPLHSDSDSDERNSDGAVTQNK2. 002E+19            | sp Q9H4G0 E41L1_HUMAN |
| 11739 | WGQPPSPTPVPRPPDADPNTSPKPLEGRPER2. 02E+27          | sp Q01130 SRSF2_HUMAN |
| 11740 | DHNVGSPPKSPTHASQHTQTEK200000000000                | sp Q9NTJ3 SMC4_HUMAN  |
| 11741 | SWDSSPVDRPEPEAASPTTR200000                        | sp Q05209 PTN12_HUMAN |
| 11742 | TSGSDDPGICSNTDSTQAQVLLGK2E+23                     | sp Q14839 CHD4_HUMAN  |
| 11743 | TEPAEAEAAAGSPSESPSPAEEELPGSHAEPVPAQGEAPGEQAR2E+46 | sp A0JNW5 UH1BL_HUMAN |
| 11744 | SQPDPVDTPTSSKPQSK20000000000                      | sp Q86WB0 NIPA_HUMAN  |
| 11745 | KASSDSEDSSEEEEEVQGPPAK2. 2020022E+20              | sp Q8NDI1 EHBP1_HUMAN |
| 11746 | DQPPFGSDSDSVEADKSSPGIHLER2000002200000000         | sp P55884 EIF3B_HUMAN |
| 11747 | KYDSSSLPPSNSGK20000000000                         | sp P46013 KI67_HUMAN  |
| 11748 | RASHTLLPSHR20000000                               | sp Q14978 NOLC1_HUMAN |
| 11749 | AASSSPGSPVASSPSR200000000000                      | sp Q14676 MDC1_HUMAN  |
| 11750 | RGTSPRPPEGGLGYSQLGDDDLK2. 00000000002E+20         | sp Q68CP9 ARID2_HUMAN |
| 11751 | AAAAATAPPSPGPAQPGPR20000000000000                 | sp Q9UKV3 ACINU_HUMAN |
|       |                                                   | sp Q92538 GBF1_HUMAN  |
|       |                                                   | sp Q9UQ88 CD11A_HUMAN |
|       |                                                   | sp P21127 CD11B_HUMAN |
|       |                                                   | sp Q6SPF0 SAMD1_HUMAN |

|       |                                                          |                       |
|-------|----------------------------------------------------------|-----------------------|
| 11752 | AQTTPGPSLSGSK200000000200                                | sp Q9UQ35 SRRM2_HUMAN |
| 11753 | DDPGQQTDSSEDEDIIGPMPAK2022000000000000                   | sp Q8IXQ4 GPAM1_HUMAN |
| 11754 | DRQSLDGFYSHGMAEGR2000000000000000                        | sp Q12802 AKP13_HUMAN |
| 11755 | LNEAQPSTIATSMRDSLIDSLT20                                 | sp P56537 IF6_HUMAN   |
| 11756 | RNSSSPVSPASVPGQR2002000000000                            | sp Q9H1B7 I2BPL_HUMAN |
| 11757 | RSSSPAELDLK2200000000                                    | sp Q2PPJ7 RGPA2_HUMAN |
| 11758 | SRSPLHPMSEIPR20200000000000                              | sp Q9NVW2 RNF12_HUMAN |
| 11759 | STAPSAASASASAAAASSPAGGGAELELLEHCGVCR2E+21                | sp Q13263 TIF1B_HUMAN |
| 11760 | GESAPTLSTSPSPSSPSPSPSPTLGR2. 2E+19                       | sp Q9H330 TM245_HUMAN |
| 11761 | LEDAESSNPNLQSLSTDALPSASK20000000000000                   | sp Q9Y294 ASF1A_HUMAN |
| 11762 | AASSSPGSPVASSPSR20200                                    | sp Q92538 GBF1_HUMAN  |
| 11763 | TLSPTPASATAPTSQGIPTSDEESTPK200020000                     | sp Q9NQS7 INCE_HUMAN  |
| 11764 | STFSLPEEEEEPEPLVFAEQPSVK2. 02E+23                        | sp Q6Q0C0 TRAF7_HUMAN |
| 11765 | TKSSSDLSPPRR20200200200000                               | sp Q9BRD0 BUD13_HUMAN |
| 11766 | SLRQSFR20002000                                          | sp Q6P1M3 L2GL2_HUMAN |
| 11767 | TSQLGDSPFYPGK2000000000000                               | sp Q15334 L2GL1_HUMAN |
| 11768 | SLDGAEFRPASVSENHDAGPDGDKR2000000000000000                | sp P49790 NU153_HUMAN |
| 11769 | IEVLPVDTGAGGYSGNSGSPK2000000000000000                    | sp Q9H4G0 E41L1_HUMAN |
| 11770 | QPPPLAPQSPQGGVMGGSNSNQQQMR2. 000001E+19                  | sp Q92738 US6NL_HUMAN |
| 11771 | APVHFVEPLSPTGVAGHR2000000000                             | sp P46937 YAP1_HUMAN  |
| 11772 | RLSSTSLASGHSVR2002000000000                              | sp Q5T5Y3 CAMP1_HUMAN |
| 11773 | DLSTSPKPSPIPSPVLGR2000020002000000                       | sp Q9BZL6 KPCD2_HUMAN |
| 11774 | SWDSSSPVDRPEPEAASPTR2. 0022E+21                          | sp Q8NDI1 EHBP1_HUMAN |
| 11775 | HALTSPSLGGQGR20000000000                                 | sp Q86WB0 NIPA_HUMAN  |
| 11776 | SSFNVSDVARPEAAGSPPEEGGCTEGTPAK2E+29                      | sp Q5PRF9 SMAG2_HUMAN |
| 11777 | TPAPDPGSPRTPPPTSR20000000200                             | sp Q92619 HMHA1_HUMAN |
| 11778 | SSSVGSSSSYPISPAUSR20002000000                            | sp Q96LL9 DJC30_HUMAN |
| 11779 | VLTQMGSPLNPISSVS2020                                     | sp Q15149 PLEC_HUMAN  |
| 11780 | FVHGSPSR2000                                             | sp Q99717 SMAD5_HUMAN |
| 11781 | SAPTSPTATNISSK2000000000000000                           | sp Q5T200 ZC3HD_HUMAN |
| 11782 | AASADSTTEGTPADGFTVLSTK2000000000000000                   | sp Q9H792 PEAK1_HUMAN |
| 11783 | KAPSASDSKADSDGAKPEPVAMAR2. 0202E+21                      | sp 075367 H2AY_HUMAN  |
| 11784 | GSGEKPVAPGDDTESLHSQGEFEFDMPQPPHGHVLR2. 0200000000001E+25 | sp Q7Z4V5 HDGR2_HUMAN |
| 11785 | NYSSPPPCHLSR2000000000                                   | sp Q12888 TP53B_HUMAN |
| 11786 | DKLCSPLSEPGPSK200000000000                               | sp Q12986 NFX1_HUMAN  |
| 11787 | EYIPGQPPLSQSSDSSPTR220200000                             | sp Q5VUA4 ZN318_HUMAN |
| 11788 | RLEISPDSSPER200200000                                    | sp P07814 SYEP_HUMAN  |
| 11789 | TNTPQGVLPSSQLK2000000000000                              | sp Q99959 PKP2_HUMAN  |
| 11790 | FLSHSTDLSLNK2000000                                      | sp Q14004 CDK13_HUMAN |
| 11791 | GSSPSIRPIQGSQSSSPVEK2200000                              | sp Q12802 AKP13_HUMAN |
| 11792 | SPTPNQDQDGMVEK20000000000000                             | sp Q92560 BAP1_HUMAN  |
| 11793 | LIHGEDSDSEGEERSSGSEAGGAGHEEGR2. 020000000022E+27         | sp Q3KR37 GRM1B_HUMAN |
| 11794 | DKSPGRPLER200000000                                      | sp Q9C0C9 UBE20_HUMAN |
| 11795 | HTIIPAKSPEK20000                                         | sp O14578 CTRO_HUMAN  |
| 11796 | KHSEAEFTPPLKCSPK2000002000000000                         | sp Q9NZM1 MYOF_HUMAN  |
| 11797 | KRTSSTCSNESLSVGGTSVTPR2. 22E+19                          | sp Q3B726 RPA43_HUMAN |
| 11798 | ESSEPPAPASSPEAASPTEQGPAGTSK2. 00000022E+25               | sp 060343 TBCD4_HUMAN |
| 11799 | WQSAFTK200000                                            | sp Q92766 RREB1_HUMAN |
| 11800 | CCSPPNELGFR2000000000                                    | sp 075635 SPB7_HUMAN  |
| 11801 | KHSEAEFTPPLKCSPK2000002000                               | sp Q9BYW2 SETD2_HUMAN |
| 11802 | SGSYGRSPSPYGR20020200000                                 | sp Q3B726 RPA43_HUMAN |
| 11803 | TVSFAIEVVPAPPEPPPATPPQAK2. 02E+24                        | sp Q9NYV4 CDK12_HUMAN |
|       |                                                          | sp O15047 SET1A_HUMAN |

|       |                                                  |           |             |
|-------|--------------------------------------------------|-----------|-------------|
| 11804 | SSTVATLQGTPDHGDPR2000000000000000                | sp Q8IVT2 | MISP_HUMAN  |
| 11805 | TPAPEPEPCEASELPAK200000000000000000              | sp Q9ULV3 | CIZ1_HUMAN  |
| 11806 | KPVTVSPTTPTSPTEGEAS200000000000000000            | sp Q9Y6G9 | DC1L1_HUMAN |
| 11807 | ISDSESEDPPR20202000000                           | sp Q96ST2 | IWS1_HUMAN  |
| 11808 | QGSITSPQANEQSVTPQR20000002020000                 | sp Q9UQ35 | SRRM2_HUMAN |
| 11809 | EDLSPAFDHSPNK20000020000                         | sp P17706 | PTN2_HUMAN  |
| 11810 | EGPPAPPPVKPPSPVNIR2000000                        | sp Q8TF74 | WIPF2_HUMAN |
| 11811 | HDSSAPDPAPDSADEVMPEAVPEVASEPGLESASHPNVDR2E+29    | sp Q9BTC0 | DIDO1_HUMAN |
| 11812 | EEGSLSDTEADAVSGQLPDPTNPSAGK2.02E+23              | sp Q8N1G4 | LRC47_HUMAN |
| 11813 | TPMYGSQTPLQDGSR2000000200000000                  | sp 000267 | SPT5H_HUMAN |
| 11814 | LKSPSQDNTDSYFR2000000000000                      | sp Q9UJF2 | NGAP_HUMAN  |
| 11815 | SVSKESVASMADSGDDFASDGSSSR20000000000000000000    | sp Q92805 | GOGA1_HUMAN |
| 11816 | GPGQPSSPQR200000                                 | sp 095400 | CD2B2_HUMAN |
| 11817 | SLSSSPVKK2200000                                 | sp Q9H3Q1 | BORG4_HUMAN |
| 11818 | EGPSCSPGPF20000000                               | sp Q4AC94 | C2CD3_HUMAN |
| 11819 | YSEFTSTSGTGHNQTR200200000000000000               | sp P48960 | CD97_HUMAN  |
| 11820 | VLTANSNPSSPSAAK22000000                          | sp Q9NV56 | MRGBP_HUMAN |
| 11821 | RSPGPGSPQSPR200000200000                         | sp Q9P1Y5 | CAMP3_HUMAN |
| 11822 | GRSPSPIGVGSEMCR20200000001000                    | sp Q9Y4B5 | MTCL1_HUMAN |
| 11823 | RLSLDIQSPPNIGLR20000000000000                    | sp Q9NSI6 | BRWD1_HUMAN |
| 11824 | AALLAQYADVTDDEDEADEKDDSGATTMNIGSDK20000000000000 | sp Q96MW1 | CCD43_HUMAN |
|       |                                                  | sp Q9TNN7 | 1C05_HUMAN  |
|       |                                                  | sp P04222 | 1C03_HUMAN  |
|       |                                                  | sp Q07000 | 1C15_HUMAN  |
|       |                                                  | sp Q29865 | 1C18_HUMAN  |
|       |                                                  | sp Q29960 | 1C16_HUMAN  |
| 11825 | GGSCSQAASSNSAQGSDESLIACK2.0002E+20               | sp Q29963 | 1C06_HUMAN  |
|       |                                                  | sp P30504 | 1C04_HUMAN  |
|       |                                                  | sp P30505 | 1C08_HUMAN  |
|       |                                                  | sp P30508 | 1C12_HUMAN  |
|       |                                                  | sp P30510 | 1C14_HUMAN  |
|       |                                                  | sp Q95604 | 1C17_HUMAN  |
|       |                                                  | sp P30510 | 1C14_HUMAN  |
|       |                                                  | sp Q9TNN7 | 1C05_HUMAN  |
|       |                                                  | sp P04222 | 1C03_HUMAN  |
|       |                                                  | sp Q07000 | 1C15_HUMAN  |
|       |                                                  | sp Q29865 | 1C18_HUMAN  |
| 11826 | GGSCSQAASSNSAQGSDESLIACK2020000000000000         | sp Q29960 | 1C16_HUMAN  |
|       |                                                  | sp Q29963 | 1C06_HUMAN  |
|       |                                                  | sp P30504 | 1C04_HUMAN  |
|       |                                                  | sp P30505 | 1C08_HUMAN  |
|       |                                                  | sp P30508 | 1C12_HUMAN  |
|       |                                                  | sp Q95604 | 1C17_HUMAN  |
| 11827 | ASPVGDGNFR2000000000                             | sp Q86YS7 | C2CD5_HUMAN |



|       |                                               |                       |
|-------|-----------------------------------------------|-----------------------|
|       |                                               | sp Q9TNN7 1C05_HUMAN  |
|       |                                               | sp Q07000 1C15_HUMAN  |
|       |                                               | sp Q29960 1C16_HUMAN  |
|       |                                               | sp Q29963 1C06_HUMAN  |
| 11828 | GGSCSQAASSNSAQGSDESLIACK20002000000000        | sp P30505 1C08_HUMAN  |
|       |                                               | sp P30508 1C12_HUMAN  |
|       |                                               | sp Q95604 1C17_HUMAN  |
|       |                                               | sp P04222 1C03_HUMAN  |
|       |                                               | sp Q29865 1C18_HUMAN  |
|       |                                               | sp P30504 1C04_HUMAN  |
|       |                                               | sp P30510 1C14_HUMAN  |
| 11829 | KPFSVSSTPTMSR222000000                        | sp P82094 TMF1_HUMAN  |
|       |                                               | sp P30510 1C14_HUMAN  |
|       |                                               | sp P04222 1C03_HUMAN  |
|       |                                               | sp Q07000 1C15_HUMAN  |
|       |                                               | sp Q29865 1C18_HUMAN  |
|       |                                               | sp Q29960 1C16_HUMAN  |
| 11830 | GGSCSQAASSNSAQGSDESLIACK2002000000            | sp Q29963 1C06_HUMAN  |
|       |                                               | sp P30504 1C04_HUMAN  |
|       |                                               | sp P30508 1C12_HUMAN  |
|       |                                               | sp Q95604 1C17_HUMAN  |
|       |                                               | sp Q9TNN7 1C05_HUMAN  |
|       |                                               | sp P30505 1C08_HUMAN  |
| 11831 | RNSNSPPSPSSMNQR20200000210000                 | sp Q7Z5L9 I2BP2_HUMAN |
| 11832 | SRSYSPAHR232000000                            | sp Q9Y2W1 TR150_HUMAN |
| 11833 | ISSKSPGHMVILDQTK2200000100000000              | sp Q9NWH9 SLTM_HUMAN  |
| 11834 | VSPAPGSAPETPEDK2000000000200000               | sp Q13459 MY09B_HUMAN |
| 11835 | SPEQLCAPAEAAPCPAEPER2E+20                     | sp Q86UD0 SAPC2_HUMAN |
| 11836 | TNSGISSASGGSTEPTTPDSERPAQALLR2000000000000000 | sp Q86X10 RLGPB_HUMAN |
| 11837 | GGEKTPVSGSLKSPVPR20020000000000               | sp Q8NI27 THOC2_HUMAN |
| 11838 | RESESEDETPPAAPQLIK20200200000000000           | sp O60832 DKC1_HUMAN  |
|       |                                               | sp P49792 RBP2_HUMAN  |
|       |                                               | sp Q7Z3J3 RGPD4_HUMAN |
| 11839 | EDALDDSVSSSVHASPLASSPVRK20002000000           | sp A6NKT7 RGPD3_HUMAN |
|       |                                               | sp O14715 RGPD8_HUMAN |
|       |                                               | sp Q99666 RGPD5_HUMAN |
| 11840 | NHKPSRSFSR2000200                             | sp P84103 SRSF3_HUMAN |
| 11841 | STSYGYSR20000000                              | sp Q13242 SRSF9_HUMAN |
| 11842 | VQSSSESTSSPSQHEATPGAR20000000000000000000     | sp O75152 ZC11A_HUMAN |
| 11843 | KMSQPGSPSPK12000200000                        | sp Q14839 CHD4_HUMAN  |
| 11844 | RSSLRSR2200000                                | sp O43521 B2L11_HUMAN |
| 11845 | EGPEPPEEVPPTTPPVVK2000000                     | sp P48634 PRC2A_HUMAN |
| 11846 | VGSLTPPSSPK22000                              | sp Q2M2I8 AAK1_HUMAN  |
| 11847 | SGPSPLSSPNGK2000200000                        | sp O75179 ANR17_HUMAN |
| 11848 | ISDSESEDPPRHQASDSENEELPKPR2.0002000000002E+25 | sp Q96ST2 IWS1_HUMAN  |
| 11849 | QFIAAQNLGPASGHGTPASSPSSSSLPSPMSPTR200000      | sp Q8WX93 PALLD_HUMAN |
| 11850 | VSEEQTPPSPAGAGMSTAMGR20000000000000000000     | sp Q16666 IF16_HUMAN  |
| 11851 | HSLSGSSPGMK20000200000                        | sp Q9UQ35 SRRM2_HUMAN |
| 11852 | STSAPQMSPGSSDNQSSSPQPAQQK2.200012002E+24      | sp Q14157 UBP2L_HUMAN |
| 11853 | VAELALSLSSTSDDEPPSSVSHGAK200000000000000000   | sp Q8N1G2 CMTR1_HUMAN |
| 11854 | YSPTSPTYSPPTPK20200030002000                  | sp P24928 RPB1_HUMAN  |
| 11855 | ETSAATLSPGASSR2002020000000                   | sp Q9Y6I9 TX264_HUMAN |
| 11856 | EKWDCESICSTYSNLYNHPQLIK20002000000000000000   | sp Q96GA3 LTV1_HUMAN  |
| 11857 | TVQSNSPISALAPT GK20000000000000               | sp O95292 VAPB_HUMAN  |

|       |                                                 |                       |
|-------|-------------------------------------------------|-----------------------|
| 11858 | ALGYWGEQDVQEMPAPESPPGR200000                    | sp Q8NC42 RN149_HUMAN |
| 11859 | YSPTSPTYSPVYTPSPK200000000030000000             | sp P24928 RPB1_HUMAN  |
| 11860 | APKPPTDGSTSTPSEDQALGK2000000000000000           | sp Q8NHM5 KDM2B_HUMAN |
| 11861 | MEILMTVSK120000                                 | sp 075317 UBP12_HUMAN |
| 11862 | VDSPSHGLVTSSLCIPSPAR2000000000                  | sp Q9UER7 DAXX_HUMAN  |
| 11863 | LMLSTSEYSQSPK202000                             | sp Q12888 TP53B_HUMAN |
| 11864 | GPGGSQGSQSPQGAR20002000000                      | sp Q96MG7 MAGG1_HUMAN |
| 11865 | SEAPNSSEEDSPIKSDK200000200020000000             | sp Q8IYH5 ZZZ3_HUMAN  |
| 11866 | MSCFSRSPSPTPLDR2002100000000                    | sp Q9UQ35 SRRM2_HUMAN |
| 11867 | ESSLPSK2000000                                  | sp 075477 ERLN1_HUMAN |
| 11868 | QTDPSQPQESSKPLGGIQPSSQTIQPK2E+27                | sp Q14004 CDK13_HUMAN |
|       |                                                 | sp Q29960 1C16_HUMAN  |
|       |                                                 | sp Q9TNN7 1C05_HUMAN  |
|       |                                                 | sp P04222 1C03_HUMAN  |
|       |                                                 | sp Q07000 1C15_HUMAN  |
|       |                                                 | sp Q29865 1C18_HUMAN  |
| 11869 | GGSCSQAASSNSAQGSDESLIACK20002000000000          | sp Q29963 1C06_HUMAN  |
|       |                                                 | sp P30504 1C04_HUMAN  |
|       |                                                 | sp P30505 1C08_HUMAN  |
|       |                                                 | sp P30508 1C12_HUMAN  |
|       |                                                 | sp P30510 1C14_HUMAN  |
|       |                                                 | sp Q95604 1C17_HUMAN  |
|       |                                                 | sp TAU_HUMAN          |
| 11870 | SPVVSQDTSR20002000                              | sp P10636 TAU_HUMAN   |
| 11871 | NSSLGSPSNLCGSPGSIR200000020000000               | sp Q9C0B0 UNK_HUMAN   |
| 11872 | SDSPVPTAPTSGGPKSTASAVPELATDPELEK2E+33           | sp Q86U44 MTA70_HUMAN |
| 11873 | GCDSPDPDTSYVLTPTHEEK30020000000                 | sp Q02078 MEF2A_HUMAN |
| 11874 | SSFPDSTEAFDPR2000000000000                      | sp Q86UL8 MAGI2_HUMAN |
| 11875 | HSTASHSSHTSGIEADTKPR2.02022E+19                 | sp Q96NE9 FRMD6_HUMAN |
| 11876 | IFVGGLSPDTPEEK200000000                         | sp Q14103 HNRPD_HUMAN |
| 11877 | SWSASDPFYTNR2000000000000                       | sp Q9Y2G3 AT11B_HUMAN |
| 11878 | SRSPYSPVLR203200000                             | sp Q14004 CDK13_HUMAN |
| 11879 | SPQSDPADTPTNTK200000002000000                   | sp P46013 KI67_HUMAN  |
| 11880 | RVSSRSVSGSPEPAK2220202020000000                 | sp Q8IYB3 SRRM1_HUMAN |
| 11881 | SAASPVVSSMPERASESSSEEKDDYEIFVK2.00022100002E+27 | sp P18583 SON_HUMAN   |
| 11882 | KGTTPPRSPEASPK200020000000                      | sp Q9HDC5 JPH1_HUMAN  |
| 11883 | TLGTPTQPGSTPR20200002000                        | sp Q8NFH5 NUP53_HUMAN |
| 11884 | NKSPPADPPR200000000                             | sp 060566 BUB1B_HUMAN |
| 11885 | VSELLQGLSFGSDSVEK200200000                      | sp Q96JS3 PGBD1_HUMAN |
| 11886 | SSSELSLSDKSELKK220200000000000                  | sp Q86X27 RGPS2_HUMAN |
| 11887 | EAASSGDDSGRDREPPVQR22000200000000000            | sp Q9BW71 HIRP3_HUMAN |
| 11888 | RFSLSPSLGPQASR2000200000000                     | sp Q9NYF3 FA53C_HUMAN |
| 11889 | GELSRSPSPFTHTHLAQGYR20202000000000000           | sp P38398 BRCA1_HUMAN |
| 11890 | SPSRTLSPGR20002020000                           | sp Q13523 PRP4B_HUMAN |
| 11891 | EEEVERPVSSPGDPEQK200000000                      | sp 043149 ZZEF1_HUMAN |
| 11892 | HKSGSMEEDVDTSPGGDYYSPTSSSR1E+25                 | sp P08651 NF1C_HUMAN  |
| 11893 | RTGRLGQR20000000                                | sp Q5HYW3 RGAG4_HUMAN |
| 11894 | SFSPKSPLELGEKLSPLPGPGAGDPR2.002000000002E+25    | sp Q15742 NAB2_HUMAN  |
| 11895 | TASPINSARGTSPK20200020000000000                 | sp Q9BTV5 FSD1_HUMAN  |
| 11896 | SYSPDGKESPSDK3200000200000                      | sp P43243 MATR3_HUMAN |
| 11897 | AGSSASSPSPASSPHSAVPAADPADSASGSSNK2E+19          | sp Q8NDF8 PAPD5_HUMAN |
| 11898 | GPSPAPASSPKR20000200000                         | sp Q9H7N4 SFR19_HUMAN |
| 11899 | SRSRSPAHNR2000232000000                         | sp Q9Y2W1 TR150_HUMAN |
| 11900 | GQSQTSPDHRSDTSSPEVR2022200000                   | sp Q9UQ35 SRRM2_HUMAN |

|       |                                                       |                        |
|-------|-------------------------------------------------------|------------------------|
| 11901 | GAPSQDDESGGIEDSPDR20000                               | sp Q9H4G0 E41L1_HUMAN  |
| 11902 | SASPYPSHSLSSPQR200000000020000                        | sp Q5T200 ZC3HD_HUMAN  |
| 11903 | VEMYSGSDDDDDFNKLPK1300200000000000                    | sp 060841 IF2P_HUMAN   |
| 11904 | NVQQDNSEAGTQPQVQTDAQQTSQSPPELTSEENKIPDADK200000000000 | sp Q92598 HS105_HUMAN  |
| 11905 | HLSTPSSVSPEPQDSAK2000000000000                        | sp Q9NZN5 ARHGC_HUMAN  |
| 11906 | SSTPGSPTHVSSGSNASR2000000000000000                    | sp Q14CZ0 CP072_HUMAN  |
| 11907 | LSTTPSPTSSLHEDGVEDFR202020000000000000                | sp 094842 TOX4_HUMAN   |
| 11908 | SRSISLR20200000                                       | sp Q16629 SRSF7_HUMAN  |
| 11909 | QLSALSSDGEGQGRPVR2000000000000000                     | sp 015438 MRP3_HUMAN   |
| 11910 | RLSSSLNPSK202000000                                   | sp Q13535 ATR_HUMAN    |
| 11911 | IKEEPVEVDSSPPDSPASSPCSPPLK220000002200200000          | sp P17544 ATF7_HUMAN   |
| 11912 | TPHVQAVQGPLGSPPKR200000                               | sp Q15149 PLEC_HUMAN   |
| 11913 | GRNDSGEENVPLDLTR20000000000000                        | sp Q6R327 RICTR_HUMAN  |
| 11914 | RGTSPRPPEGGLGYSQLGDDDLK2.00000000003E+21              | sp Q9UQ88 CD11A_HUMAN  |
| 11915 | SQDSYPGSPSLSPR202000                                  | sp P21127 CD11B_HUMAN  |
| 11916 | LGSLVDEFK20000000                                     | sp Q6VN20 RBP10_HUMAN  |
| 11917 | IDFTPVSPAPSPTR20000                                   | sp P12956 XRCC6_HUMAN  |
| 11918 | KPIKSPSKDASSGK20000022000                             | sp Q7Z309 F122B_HUMAN  |
| 11919 | HLDVDLDRQLSSIDKNPSEK20200000000000                    | sp Q13523 PRP4B_HUMAN  |
| 11920 | NPSVVIKPEACSPQFGK2000000                              | sp Q9Y6D5 BIG2_HUMAN   |
| 11921 | SRSRSDYNYR2020200000000                               | sp Q8WXE1 ATRIP_HUMAN  |
|       |                                                       | sp 075494 SRS10_HUMAN  |
|       |                                                       | sp Q29960 1C16_HUMAN   |
|       |                                                       | sp Q9TNN7 1C05_HUMAN   |
|       |                                                       | sp Q07000 1C15_HUMAN   |
|       |                                                       | sp Q29963 1C06_HUMAN   |
|       |                                                       | sp P30505 1C08_HUMAN   |
| 11922 | GGSCSQAASSNSAQGSDESLIACK2E+20                         | sp P30508 1C12_HUMAN   |
|       |                                                       | sp Q95604 1C17_HUMAN   |
|       |                                                       | sp P04222 1C03_HUMAN   |
|       |                                                       | sp Q29865 1C18_HUMAN   |
|       |                                                       | sp P30504 1C04_HUMAN   |
|       |                                                       | sp P30510 1C14_HUMAN   |
| 11923 | QSVTSFPDADAFHHQVHDDLLSSSEEECKDR2.2E+29                | sp P50402 EMD_HUMAN    |
| 11924 | EPAPLLSAQYETLSDSD2000                                 | sp 075376 NCOR1_HUMAN  |
| 11925 | ASQSRPNSSALETLGGEK2000020000000000                    | sp 094804 STK10_HUMAN  |
| 11926 | AQGEPVAGHESPKIPYEK200000000                           | sp 094979 SC31A_HUMAN  |
| 11927 | SRSQSRNSPLPVPSK2020202000000000                       | sp Q13247 SRSF6_HUMAN  |
| 11928 | YTPTSPSYSPSSPEYTPTSPK300020002000000                  | sp P24928 RPB1_HUMAN   |
| 11929 | CPEILSDESSDEDEKKNK2002220000000000                    | sp P35659 DEK_HUMAN    |
| 11930 | VTDKDCNESTDNDELEDEPEEPFYR220000000000000000           | sp Q9Y2K1 ZBTB1_HUMAN  |
| 11931 | AADISLDNLVEGK2000000000                               | sp Q12888 TP53B_HUMAN  |
| 11932 | EMEHNTVCAAGTSPVGEIGEEK1.0002E+21                      | sp P18583 SON_HUMAN    |
| 11933 | ETNLDLPLVDTHSK2000000000000000                        | sp P08670 VIME_HUMAN   |
| 11934 | DFTNEAPPAPLPDASASPLSPHR20000                          | sp Q6WCQ1 MPRIP_HUMAN  |
| 11935 | SLSNTPDYCHDK200000000000                              | sp Q8NG31 CASC5_HUMAN  |
| 11936 | SESAPTLHPYSPLSPK200000000000000000                    | sp Q8WUF5 IASPP_HUMAN  |
| 11937 | SRSSVGSSSSYPIPAVSR2220002000000                       | sp Q15149 PLEC_HUMAN   |
| 11938 | SAPASNAGVLSAHSSGAQTPELSR2.000200000002E+27            | sp Q01167 FO XK2_HUMAN |
| 11939 | YMNSDTSPELR100000200000                               | sp Q96ST3 SIN3A_HUMAN  |
| 11940 | SRDSFLK20000000                                       | sp P46778 RL21_HUMAN   |
| 11941 | VAFDPEQKPLHGVLTPTSSPASSPLVAK200000022000000           | sp Q14684 RRP1B_HUMAN  |
| 11942 | STPHRTPITPNTK20002000200000                           | sp Q9NQW6 ANLN_HUMAN   |

|       |                                                                 |                       |
|-------|-----------------------------------------------------------------|-----------------------|
| 11943 | TSPCQSPTISEGPVPSLPIRPSR2. 2E+23                                 | sp 043426 SYNJ1_HUMAN |
| 11944 | RESESEDETPPAAPQLIKK2000200000000000000                          | sp 060832 DKC1_HUMAN  |
| 11945 | SLNSVVTSEPDKHSLLVGDFR2. 0020022E+21                             | sp Q04656 ATP7A_HUMAN |
| 11946 | FFCSDSTDCVSNK20000000000                                        | sp Q9UQ84 EXO1_HUMAN  |
| 11947 | GSGVAQSPQQPPPPQQQQQPPQQPTPPK2E+22                               | sp Q6VY07 PACS1_HUMAN |
| 11948 | ASPSKPASAPASR20000000000                                        | sp P27816 MAP4_HUMAN  |
| 11949 | AAIELPSLEVLSDQEEDREQCGVK200000000000000                         | sp Q9BQI3 E2AK1_HUMAN |
| 11950 | NSDSIVSLPQSDRSSSSQESLNRPLSAK2. 00020022E+23                     | sp Q7Z460 CLAP1_HUMAN |
| 11951 | ELSPLISLSPVPPLSPIHSNQQTLPR2. 002000002E+21                      | sp P51825 AFF1_HUMAN  |
| 11952 | FNSLPQYSPVTFDR20000000                                          | sp Q8WY36 BBX_HUMAN   |
| 11953 | GHVTPNLSR2000000                                                | sp Q96CP6 GRM1A_HUMAN |
| 11954 | KPPAPSPVQSQSPSTNWSPAVPVK2. 000002022E+19                        | sp Q8IYB3 SRRM1_HUMAN |
| 11955 | GYTSDSEVYTDHGRPGK2000000000000                                  | sp Q92538 GBF1_HUMAN  |
| 11956 | LSEEAECNPSTPSK200000                                            | sp 094804 STK10_HUMAN |
| 11957 | SITSTPLSGK2002000                                               | sp Q9P0K7 RAI14_HUMAN |
| 11958 | LSQMQSPIPLTETR102000000000                                      | sp Q2VPK5 CTU2_HUMAN  |
| 11959 | TRHSPTPQQSNR2020000000                                          | sp Q8IYB3 SRRM1_HUMAN |
| 11960 | EGMNPYSYDEYADSDDEDQHDAYLER1. 0000003E+22                        | sp Q08945 SSRP1_HUMAN |
| 11961 | GVAPADSPEAPR2000000                                             | sp Q9P2G1 AKIB1_HUMAN |
| 11962 | TGVTSTSDSEEGDDQEGEK2000020000000000000                          | sp 075475 PSIP1_HUMAN |
| 11963 | LPSSPASPSPK2200000000                                           | sp Q9H4G0 E41L1_HUMAN |
| 11964 | EIEMSVDDDDINSSK1000000000200                                    | sp Q9NQW6 ANLN_HUMAN  |
| 11965 | SLRGSDALSETSSVSHIEDLEK2000200000000000000                       | sp Q6P996 PDXD1_HUMAN |
| 11966 | VSPASPAGSPSADFAVHGESLGDR2E+23                                   | sp Q96C92 SDCG3_HUMAN |
| 11967 | DGSGTPSRHSLSGSSPGMK200000000002200000                           | sp Q9UQ35 SRRM2_HUMAN |
| 11968 | SEESSDDESHPLR22000000000                                        | sp Q9UQ84 EXO1_HUMAN  |
| 11969 | DDSHSAEDSEDEKEDHK20200000000000000                              | sp Q9H1E3 NUCKS_HUMAN |
| 11970 | QHEAPSNRPLNELLTPQGSPR200000000000002000                         | sp P10398 ARAF_HUMAN  |
| 11971 | SQPSPVTVKPKPPAR2002000000000000                                 | sp Q96AY4 TTC28_HUMAN |
| 11972 | TPNDFSEAPSSPSAQDHQPTLGLACSQLHSPQHK2. 02E+25                     | sp Q6T4R5 NHS_HUMAN   |
| 11973 | RVSPSPPR2020000                                                 | sp Q5VUA4 ZN318_HUMAN |
| 11974 | DGSDYDPYDFSDTEEMPQVHTPK3. 00000000001E+20                       | sp P25205 MCM3_HUMAN  |
| 11975 | SCTPSPDQISHRASLEDAPVDDLTR2. 000020002E+21                       | sp Q7Z2W4 ZCCHV_HUMAN |
| 11976 | EEATYGVWAERDSDDERPSFGGK2E+20                                    | sp Q9UBB9 TFP11_HUMAN |
| 11977 | DTPGHGSGWAETPR20000000002000                                    | sp 075533 SF3B1_HUMAN |
| 11978 | AKSPAPGLASGDRPPSVSSVHSEGCNR2. 0000002E+26                       | sp Q9Y618 NCOR2_HUMAN |
| 11979 | DGTAPPPQSPGSPGTGQDEEWSDEESPRK2000000000000000000                | sp Q9UKS6 PACN3_HUMAN |
| 11980 | ALEQQAESDSSDTEEKDDDDDEEDVGKR2. 02002E+22                        | sp Q9BXY0 MAK16_HUMAN |
| 11981 | SPAAPGQSPTGVCYER2000000000000000000                             | sp 075534 CSDE1_HUMAN |
| 11982 | SLSGTVVSR200000000                                              | sp Q70EL1 UBP54_HUMAN |
| 11983 | GTPPLTPGR200000000                                              | sp Q9Y3Q4 HCN4_HUMAN  |
| 11984 | SPAPGLASGDRPPSVSSVHSEGCNR2. 000000000002E+26                    | sp Q9Y618 NCOR2_HUMAN |
| 11985 | SFSPEER2020000                                                  | sp Q9UDY2 ZO2_HUMAN   |
| 11986 | SAPASPTHPLMSPR202000010000                                      | sp P85037 FOXK1_HUMAN |
| 11987 | DGQDAIAQSPEKESK20000000                                         | sp Q9NWH9 SLTM_HUMAN  |
| 11988 | SAPASPTHPLMSPR2000002000010000                                  | sp P85037 FOXK1_HUMAN |
| 11989 | NSSTETDQQPHSPDSSSVHSIR2E+21                                     | sp Q92613 JADE3_HUMAN |
| 11990 | AGLESGAEPGDGSDTTK200000000000200                                | sp 060832 DKC1_HUMAN  |
| 11991 | LLAASGSNSPTR20000                                               | sp Q9NS37 ZHANG_HUMAN |
| 11992 | QVVISPQVSR2000200                                               | sp Q6ZQY3 GADL1_HUMAN |
| 11993 | DTSQSDKDLDDALDKLSDSLGQR20000000                                 | sp P20810 ICAL_HUMAN  |
| 11994 | GHPAQRPEPSPPEPEPQAPEGSQAGAEGSSPEASRSPAR2. 000000000000<br>2E+19 | sp Q6ZW31 SYDE1_HUMAN |
| 11995 | QQGHEPVSPR2000                                                  | sp Q9BTA9 WAC_HUMAN   |

|       |                                               |                        |
|-------|-----------------------------------------------|------------------------|
| 11996 | RSSSSGDQSSDSLNSPTLLAL2E+20                    | sp P15408 FOSL2_HUMAN  |
| 11997 | GLSLEHQK2000000                               | sp Q765P7 MTSSL_HUMAN  |
| 11998 | NSTDSRPVSVTYR200000000000                     | sp Q8TBZ3 WDR20_HUMAN  |
| 11999 | AVRPEVTVASSDEVCDGDR20000000000                | sp Q75151 PHF2_HUMAN   |
| 12000 | GSSGSPAHAESYSSGGGGQK2.000000003E+20           | sp P15408 FOSL2_HUMAN  |
| 12001 | MSQPGSPSPK2000002000                          | sp Q14839 CHD4_HUMAN   |
| 12002 | SRSRHSSISPSTLTLK20200220200000000             | sp Q14004 CDK13_HUMAN  |
| 12003 | DGSGTPSRHSLSGSSPGMK200000020202200000         | sp Q9UQ35 SRRM2_HUMAN  |
| 12004 | EHHPEEGSSGSEVEEIPETPCESQGEELK2.202E+22        | sp Q12888 TP53B_HUMAN  |
| 12005 | KQGEDNSTAQDTEELEK200000000000                 | sp Q86UE4 LYRIC_HUMAN  |
| 12006 | TASRPDDIPDSPSSPK2000000000002000              | sp Q5VZK9 LR16A_HUMAN  |
| 12007 | AGAPGALSPSYDGGLHGLQSK300000000000             | sp P15923 TFE2_HUMAN   |
| 12008 | GGAPDPSPGATATPGAPAQSSPDAR200000000200000      | sp Q095365 ZBT7A_HUMAN |
| 12009 | SRTSPAPWK2000000                              | sp Q9UQ35 SRRM2_HUMAN  |
| 12010 | EQSTPPKSPQ20002000                            | sp Q92615 LAR4B_HUMAN  |
| 12011 | YTPTSPSYSPSSPEYTPTSPK2.022E+20                | sp P24928 RPB1_HUMAN   |
| 12012 | DGTAPPQSPGSPGTGQDEEWSDEESPRK200020000         | sp Q9UKS6 PACN3_HUMAN  |
| 12013 | VKIIPTPRSK200                                 | sp Q14703 MBTP1_HUMAN  |
| 12014 | YADEEIPRSPFK20000                             | sp Q075369 FLNB_HUMAN  |
| 12015 | SYSRSPPYPR23200000000                         | sp Q07Z6E9 RBBP6_HUMAN |
| 12016 | LVKPSSSSSGSR200000                            | sp Q09H6B4 CLMP_HUMAN  |
| 12017 | NDSGDHSDHMHYQK2000000000000000                | sp P78332 RBM6_HUMAN   |
| 12018 | SPSPGNHTSNSSNASNATVVPQNSSAR2.2E+20            | sp Q09BTA9 WAC_HUMAN   |
| 12019 | APKPPTDGSTSPTSTPSEDQALGK2E+20                 | sp Q08NHM5 KDM2B_HUMAN |
| 12020 | HSTPSNNSNPSGPPSPNSPHR2E+20                    | sp Q09Y5S2 MRCKB_HUMAN |
| 12021 | SPSESSPQHPTTPPARPR2000002000020000000         | sp Q014733 MP2K7_HUMAN |
| 12022 | TEMKSPFNPSPQDSR200020200000000                | sp P08651 NFIC_HUMAN   |
| 12023 | EEASLLSHSPGTSNQSQPCSPKPIR2E+22                | sp Q09H4Z3 PCIF1_HUMAN |
| 12024 | IDFSSIAVPGTSSPR2000                           | sp Q05TDH0 DDI2_HUMAN  |
| 12025 | WDCESICSTYSNLYNHPQLIK200023200000000000       | sp Q096GA3 LTV1_HUMAN  |
| 12026 | QGRPSPTSPVKPSSPASKPDGPAELPLTDR2.02E+26        | sp Q013905 RPGF1_HUMAN |
| 12027 | AGEAPTENPAPPTQSSAE20002000                    | sp P16989 YBOX3_HUMAN  |
| 12028 | SRSHSDNDRFK202020000000                       | sp Q075494 SRS10_HUMAN |
| 12029 | DTHEDHDTSTENTDESNHDPQFEPIVSLPEQEIK2.2E+26     | sp P43487 RANG_HUMAN   |
| 12030 | IVPQSQVNPESPCK20000                           | sp Q09ULM3 YETS2_HUMAN |
| 12031 | RESCGSSVLTDFEGK200000000000000                | sp Q015231 ZN185_HUMAN |
| 12032 | NIGRDTPTSAGPNSFNK2000000000000                | sp Q08WW12 PCNP_HUMAN  |
| 12033 | AGGPTTPLSPTR20000                             | sp P20700 LMNB1_HUMAN  |
| 12034 | NHKPSRFSR200020200                            | sp P84103 SRSF3_HUMAN  |
| 12035 | SPSPLRGNVPSPLPTR202000000002000000            | sp Q09Y2V2 CHSP1_HUMAN |
| 12036 | DYGNSPLHR200000                               | sp P26599 PTBP1_HUMAN  |
| 12037 | TPSVSAPLALSCPR2000000000000                   | sp Q09UGP4 LIMD1_HUMAN |
| 12038 | RLSLGQGDSTEAAATEER2000000000000000            | sp Q06ZRV2 FA83H_HUMAN |
| 12039 | SLSEYELSSDLQDK200000000000000                 | sp Q06DN90 IQEC1_HUMAN |
| 12040 | ENSPAVSPTTNSTAPFGLKPR2.000000002E+19          | sp Q09Y2L9 LRCH1_HUMAN |
| 12041 | LDSEMDSSENYDTMSSPLPGK2.2E+21                  | sp Q09NTI5 PDS5B_HUMAN |
| 12042 | TPTSTPVHVK200000000                           | sp Q09ULM3 YETS2_HUMAN |
| 12043 | DDGDEEGLLTHSEEELEHSQDTDADDGALQ2.000000002E+19 | sp Q09UKM9 RALY_HUMAN  |
| 12044 | SRSISRPR202020000                             | sp Q016629 SRSF7_HUMAN |
| 12045 | RHSSVSDSQPCEPPSVGTEYSQGASPPQHQLK2.2E+31       | sp P39880 CUX1_HUMAN   |
| 12046 | LDQPGNLPGSNRR20000                            | sp P46013 KI67_HUMAN   |
| 12047 | STFVQSPADACTPPDTSSASEDEGLR2220200000000       | sp Q09P265 DIP2B_HUMAN |
| 12048 | HQPWQSPERPLSR200000000                        | sp Q09BQ52 RNZ2_HUMAN  |
| 12049 | KPGPPLSPEIRSPAGSPELR200000000200000           | sp Q096JM3 CHAP1_HUMAN |

|       |                                                           |                       |
|-------|-----------------------------------------------------------|-----------------------|
| 12050 | ASLVALPEQTASEEETPPPLLTK20000000000200                     | sp Q9UKV3 ACINU_HUMAN |
| 12051 | EDSAPSSVAR2000020000                                      | sp Q9BZE4 NOG1_HUMAN  |
| 12052 | SLSRTPSPPPFR20202000000                                   | sp Q7L4I2 RSRC2_HUMAN |
| 12053 | ELESPLTPGK20020000                                        | sp O15014 ZN609_HUMAN |
| 12054 | AEGHMGSEPR1020000                                         | sp Q9P2N6 KANL3_HUMAN |
| 12055 | AISSDDSSDEDK22000220000000                                | sp Q6PD62 CTR9_HUMAN  |
| 12056 | SPGLPMSDLK20000100000                                     | sp Q6WCQ1 MPRIP_HUMAN |
| 12057 | HSSTPNSSEFSR2000000000                                    | sp Q8N9Q2 SR1IP_HUMAN |
| 12058 | EYVNSTSEESHDEDEIRPVQQDLHR200000000000000000               | sp Q8NBU5 ATAD1_HUMAN |
| 12059 | EGSTQQLQTTSPK2000                                         | sp Q5T8P6 RBM26_HUMAN |
| 12060 | DVDVSEDSPPPLPER200000000000                               | sp Q05209 PTN12_HUMAN |
| 12061 | IHLGSSPK2000                                              | sp Q9H410 DSN1_HUMAN  |
| 12062 | VQIPVSRPDPVSDNEEDSYDEEIHDP200000000000                    | sp Q07157 ZO1_HUMAN   |
| 12063 | SSSVGSSSYPIPAVSR22200000000000000000                      | sp Q15149 PLEC_HUMAN  |
| 12064 | LSTIQNSPTK20000                                           | sp Q5VYV7 SLX4I_HUMAN |
| 12065 | KPPAPSPVQSQSPSTNWSAPVVK220000000000                       | sp Q8IYB3 SRRM1_HUMAN |
| 12066 | HPSGGSSPPR2000200000                                      | sp Q6IQ23 PKHA7_HUMAN |
| 12067 | MISTPSPK2000                                              | sp Q53F19 CQ085_HUMAN |
| 12068 | SQSLQDPTR200000000                                        | sp Q8N4C8 MINK1_HUMAN |
| 12069 | SPGTTPRPPGASK2002000000000                                | sp Q9Y3X0 CCDC9_HUMAN |
| 12070 | RESTGSYDLYPDSDDSEDQVENS3. 2000002002E+20                  | sp Q70CQ2 UBP34_HUMAN |
| 12071 | GSASPHKSSPQLVATPSQHHQQQQQIK2. 0002E+26                    | sp Q9POU4 CXXC1_HUMAN |
| 12072 | VPGSSGHLHK22000000                                        | sp Q9UEW8 STK39_HUMAN |
| 12073 | RTPSDDEEDNLFAPPK2020000000000000                          | sp Q641Q2 FA21A_HUMAN |
| 12074 | SSITEPEGPNPNIQK20000000000000                             | sp Q9Y4E1 FA21C_HUMAN |
| 12075 | LGTLAQLHASHCLDDLPLSTPSSPR20020000                         | sp Q13625 ASPP2_HUMAN |
| 12076 | FTSSQTQSTPPKPPSPSFLGLSSFPPLPGAAGNLK2. 0000022E+20         | sp Q68DK2 ZFY26_HUMAN |
| 12077 | GSPPVPSGPPMEEDGLR200000000000000000                       | sp Q92615 LAR4B_HUMAN |
| 12078 | KSSTVATLQGTDPDHGDP20000000000000                          | sp Q9H4L4 SENP3_HUMAN |
| 12079 | SKPAPSESAGYGIPLKDGDEKTDEEAEGPYSDNEMLTHK2E+32              | sp Q8IVT2 MISP_HUMAN  |
| 12080 | DTHPGSPGSPALRPLPAR20000000000000                          | sp Q6NUK4 REEP3_HUMAN |
| 12081 | SHMSGSPGPGSNTAPSTPVIIGSDKPGMEEK1. 00000000202E+30         | sp Q8N0Y2 ZN444_HUMAN |
| 12082 | TVTPASSAKTSPAK220000                                      | sp A0FGR8 ESYT2_HUMAN |
| 12083 | SGSMEEDVDTSPGGDYTSPSSPTSSSR3000020000000                  | sp Q16555 DPYL2_HUMAN |
| 12084 | GLGTDEDSLIEIICSR2000000000                                | sp P08651 NFIC_HUMAN  |
| 12085 | GSPPVPSGPPMEEDGLR20000000010000000                        | sp P07355 ANXA2_HUMAN |
| 12086 | EGAASPAPETPQPTSPETSPK2000000002000                        | sp A6NMY6 AXA2L_HUMAN |
| 12087 | YNLDASEEEDSNKK20000                                       | sp Q9H4L4 SENP3_HUMAN |
| 12088 | SGNSDSIER2000000000                                       | sp Q9Y3X0 CCDC9_HUMAN |
| 12089 | GSPTDAEGSPGLSR2000000                                     | sp O95218 ZRAB2_HUMAN |
| 12090 | SPSRPILDGK20000000000                                     | sp Q7Z2E3 APTX_HUMAN  |
| 12091 | KVYEDSGIPLPAESPK3002000000000000                          | sp Q8TER5 ARH40_HUMAN |
| 12092 | SHSPSPDPDTPSPVGD2000000000                                | sp O60890 OPHN1_HUMAN |
| 12093 | GSSQPNLSTSHSEQEYK200000000000000000                       | sp Q8IXM2 BAP18_HUMAN |
| 12094 | AKSSDSDSSEDEPPKNQPK2. 20202022E+21                        | sp Q13586 STIM1_HUMAN |
| 12095 | SRSPSPELNNK2000220000000                                  | sp O95208 EPN2_HUMAN  |
| 12096 | VQMTSPSSTGSPMFK2000000001000                              | sp Q14978 NOLC1_HUMAN |
| 12097 | RESESEDETPPAAPQLIK202000020000000000                      | sp Q9UQ35 SRRM2_HUMAN |
| 12098 | LAEIEEEKPEPDISSEESVSTVEEQENETPPATSSEAEQPK2. 200000002E+22 | sp P49790 NU153_HUMAN |
| 12099 | MFGGPGTASRPSSSR20000                                      | sp O60832 DKC1_HUMAN  |
| 12100 | EASAPLAQGEPPGREDLPT200000000000000000                     | sp Q5SSJ5 HP1B3_HUMAN |
|       |                                                           | sp P08670 VIME_HUMAN  |
|       |                                                           | sp Q9P1Y6 PHRF1_HUMAN |

|       |                                                       |                        |
|-------|-------------------------------------------------------|------------------------|
| 12101 | RESTGSYSDLYPDSDDSSSEDQVENS2. 000002002E+19            | sp Q70CQ2 UBP34_HUMAN  |
| 12102 | SSTPPRQSPSR20000020000                                | sp Q9UQ35 SRRM2_HUMAN  |
| 12103 | STSAPQMSPGSSDNQSSSPQPAQQK2200020000000000             | sp Q14157 UBP2L_HUMAN  |
| 12104 | TVSSPPTSPRPGSAATVSASTSNIIPPR220000000                 | sp 076094 SRP72_HUMAN  |
| 12105 | DNSPEPNDPEEPQEVSSSTPSDKK2E+21                         | sp Q9HB58 SP110_HUMAN  |
| 12106 | STSPAGQHHSPISSR2220000000002000                       | sp Q5T200 ZC3HD_HUMAN  |
| 12107 | TFNSPNLK200000                                        | sp Q9Y6N7 ROBO1_HUMAN  |
| 12108 | KLSLPTDLKPDLDVK2000000000000000                       | sp Q5T5C0 STXB5_HUMAN  |
| 12109 | VDENENCSLGLSPSEPPQTLDLVR200000000000                  | sp Q96P16 RPR1A_HUMAN  |
| 12110 | DQRPSPIR20000                                         | sp Q5T200 ZC3HD_HUMAN  |
| 12111 | STSMDSGSSESPASLK2000000000000000                      | sp Q15811 ITSN1_HUMAN  |
| 12112 | RSSSPFLSK22000000                                     | sp Q9NYV4 CDK12_HUMAN  |
| 12113 | SYSPDGKESPSDKK2000000020000                           | sp P43243 MATR3_HUMAN  |
| 12114 | RSSQPSPTAVPASDSPPTKQEVK2020000200000000000            | sp Q3KQU3 MA7D1_HUMAN  |
| 12115 | SGGLQTPECLSR2000020000200                             | sp P85037 FO XK1_HUMAN |
| 12116 | SLENETLNKEEDCHSPTS KPPKPDQPLK2E+28                    | sp P23588 IF4B_HUMAN   |
| 12117 | SCDEPLTPPHSPTSMQLIHDVSPR221000000002000               | sp Q9Y2K7 KDM2A_HUMAN  |
| 12118 | SLSPGKENVSA LDMEK20000000020000000                    | sp Q9H307 PININ_HUMAN  |
| 12119 | REESPMVDVQSPSAQDTQSIASDGT PQGEK1. 00000000000202E+26  | sp Q7Z6Z7 HUWE1_HUMAN  |
| 12120 | TVSPGVSPIHGQGVVENLK20000000000000000                  | sp Q9NZM3 ITSN2_HUMAN  |
| 12121 | MVEPENAVTITPLRPEDDYSR1E+22                            | sp Q14160 SCRIB_HUMAN  |
| 12122 | SQDSYPGSPSLSPR200200020002000                         | sp Q6VN20 RBP10_HUMAN  |
| 12123 | SSSMSSLTGAYTSGIPSSSR2. 001E+20                        | sp A8CG34 P121C_HUMAN  |
| 12124 | SLRGSDALSETSSVSHIEDLEK2000202220000000000             | sp Q6P996 PDXD1_HUMAN  |
| 12125 | RSTLMSSPR122000                                       | sp Q8NBR9 CK072_HUMAN  |
| 12126 | TPESKPTILVK2000000000000                              | sp Q9Y3B9 RRP15_HUMAN  |
| 12127 | SEDEDSLEEAGSPAPGPCPR20000020000000000                 | sp Q8TBB5 KLDC4_HUMAN  |
| 12128 | KHSPSPPPPTPTESR2000000000200                          | sp Q92922 SMRC1_HUMAN  |
| 12129 | AQPFGFIDS DTAEEERIPATPVVIPMK2. 02E+20                 | sp Q14676 MDC1_HUMAN   |
| 12130 | TVNSTRET PPK20000000                                  | sp Q5SSJ5 HP1B3_HUMAN  |
| 12131 | KYSISSDNSDTTDSHATSTSASR2022000000000000               | sp Q9NQC1 JADE2_HUMAN  |
| 12132 | DYGHSSSRDDYPSR20000000000                             | sp Q96E39 RMXL1_HUMAN  |
| 12133 | TSSSETEEKKPEKPLILQSLGPK2. 2E+21                       | sp P38159 RBMX_HUMAN   |
| 12134 | SPILLPK20000000                                       | sp Q9Y5K6 CD2AP_HUMAN  |
| 12135 | VNPVTSLENYTCSDSEESSEKDK20000000000000000              | sp Q8TD16 BICD2_HUMAN  |
| 12136 | GPGGSQGSQGPSPQGAR2000000000000000                     | sp Q14432 PDE3A_HUMAN  |
| 12137 | EEAPASPLRPLYPQISPLK2000000000000000                   | sp Q96MG7 MAGG1_HUMAN  |
| 12138 | GSPSVAASSPPAIPK200000020000000                        | sp P85037 FO XK1_HUMAN |
| 12139 | SVCGHLENTSVGNPNSAENSFR20002000220000000               | sp Q92610 ZN592_HUMAN  |
| 12140 | SAASPVVSSMPERASESSSEEKDDYEIFVK2. 21E+23               | sp Q96HH9 GRAM3_HUMAN  |
| 12141 | EENVDGQEVAPSSPPLAAQSPEGNHGHQEPASTSFHPPR2. 0000002E+27 | sp P18583 SON_HUMAN    |
| 12142 | LHDFLAHSSESEETSSPPR20000                              | sp Q9NWS9 ZN446_HUMAN  |
| 12143 | NSSTETDQQPHSPDSSSVHSIR2000000000000000000             | sp P46100 ATRX_HUMAN   |
| 12144 | TPNDFSEAPSSPSAQDHQPTLGLACSQLHSPQHK20000200000         | sp Q92613 JADE3_HUMAN  |
| 12145 | HPSGGSSPPPR2200000                                    | sp Q6T4R5 NHS_HUMAN    |
| 12146 | SGGLQTPECLSR2000000000200                             | sp Q6IQ23 PKHA7_HUMAN  |
| 12147 | AASADSTTEGTPADGFTVLSTK2E+20                           | sp P85037 FO XK1_HUMAN |
| 12148 | TRSWDSSSPVDRPEPEAASPTR2. 002E+21                      | sp P85037 FO XK1_HUMAN |
| 12149 | DMPMDISALSSPSCSPSPQSETPLEK2000000000000               | sp 075367 H2AY_HUMAN   |
| 12150 | SFSISPSRR2020000000                                   | sp Q86WB0 NIPA_HUMAN   |
| 12151 | ASPVTSPAAAFPTASPANK2000000000200000                   | sp Q8NDZ2 SIMC1_HUMAN  |
| 12152 | RGSQSEDESCSLHSQTLSEDER2. 02E+20                       | sp P18583 SON_HUMAN    |
|       |                                                       | sp Q9UIF9 BAZ2A_HUMAN  |
|       |                                                       | sp Q9UPZ3 HPS5_HUMAN   |

|       |                                                     |                       |
|-------|-----------------------------------------------------|-----------------------|
| 12153 | SKSYSPGRR2020200000                                 | sp Q8IWX8 CHERP_HUMAN |
| 12154 | SQLPTLEQDGGTQNPVSSPGMSQELR2001000000                | sp P46937 YAP1_HUMAN  |
| 12155 | EVYQQQYQYSGGR20000                                  | sp Q99729 ROAA_HUMAN  |
| 12156 | EVEEDESEDEEMSEDEEDDSSGEEVVIPQKK2.00001000000022E+25 | sp P19338 NUCL_HUMAN  |
| 12157 | RPNTSPDR20000                                       | sp Q86VM9 ZCH18_HUMAN |
| 12158 | YTPTSPSYSPSSPEYTPSPK3.2E+21                         | sp P24928 RPB1_HUMAN  |
| 12159 | RYSPPIQR30000000                                    | sp Q8IYB3 SRRM1_HUMAN |
| 12160 | ENQGSHESTLNPETVAINLSDVDLSK2000000000000000000       | sp P25445 TNR6_HUMAN  |
| 12161 | DDSHSAEDSEDEKEDHKNR20000020000000000000             | sp Q9H1E3 NUCKS_HUMAN |
| 12162 | VDSPLPSDKAPTPPGK200000000200000                     | sp Q12893 TM115_HUMAN |
| 12163 | QKSPEIHR2000000                                     | sp Q9NYF8 BCLF1_HUMAN |
| 12164 | ASSPSASSSSFR200000000000                            | sp Q8IXZ2 ZC3H3_HUMAN |
| 12165 | KYLHRPSR200                                         | sp Q8TBK6 ZCH10_HUMAN |
| 12166 | SGSSQELDVKPSASPQER22000000020000000                 | sp Q9UQ35 SRRM2_HUMAN |
| 12167 | NSNFSVQHPSSTSPTEK200000000000000                    | sp Q03468 ERCC6_HUMAN |
| 12168 | GCLTTPNSPSMHSR20010000                              | sp 075128 COBL_HUMAN  |
| 12169 | LLSSNEDDANILSSPTDR200000                            | sp 075448 MED24_HUMAN |
| 12170 | SRSPGSPVGEETGSPPK20020000000000000                  | sp P35611 ADDA_HUMAN  |
| 12171 | HASSPESPKPAPAPGSHR20000000000000000                 | sp Q9UQ35 SRRM2_HUMAN |
| 12172 | ISDSESEDPPRHQASDSENEELPKPR2.0200000000002E+25       | sp Q96ST2 IWS1_HUMAN  |
| 12173 | ARSPDLGPQEQMNP200000000000000                       | sp Q8IWX8 ZSC29_HUMAN |
| 12174 | DRPGSPESPLLDAPFSR20000000000                        | sp Q8TF72 SHRM3_HUMAN |
| 12175 | RSSLSSHSHQSIYR2200202000000000                      | sp 015027 SC16A_HUMAN |
| 12176 | SRTHSTSSSLGSGESPFSR2.02E+19                         | sp Q9UGV2 NDRG3_HUMAN |
| 12177 | MGQAPSQSLPPAQDQPRSPVPSAFSDQSR1E+30                  | sp Q9UQ35 SRRM2_HUMAN |
| 12178 | TSGAGSPQTPPER20000000200000                         | sp Q96MH2 HEX12_HUMAN |
| 12179 | TVSASSTGDLPK220000000                               | sp P78362 SRPK2_HUMAN |
| 12180 | EFSFEAWNAK200000000                                 | sp P78347 GTF2I_HUMAN |
| 12181 | RVSSSGKPTSLK22000000000                             | sp Q9ULD2 MTUS1_HUMAN |
| 12182 | GTVPDDAVEALADSLGK20000                              | sp P20810 ICAL_HUMAN  |
| 12183 | QKSQTPPRR20200000                                   | sp Q9UQ35 SRRM2_HUMAN |
| 12184 | KRESESEDETTPAAPQLIK20020000000000                   | sp 060832 DKC1_HUMAN  |
| 12185 | SPPKSPEEEGAVSS2000000000000000                      | sp Q01130 SRSF2_HUMAN |
| 12186 | GPSQEEEDNHSDEEDRASEP2E+19                           | sp Q86VM9 ZCH18_HUMAN |
| 12187 | LSVGEQPDVTHDPYEFLLQSEPAASAK2000000000               | sp Q9H8M2 BRD9_HUMAN  |
| 12188 | QIPAAASLIQTAWR200000000                             | sp P51787 KCNQ1_HUMAN |
| 12189 | HEDLVPPAGSPELSPQPLFRPR200020000000000               | sp Q9UPS6 SET1B_HUMAN |
| 12190 | RPGAPSLSPAPR200000                                  | sp Q5QP82 DCA10_HUMAN |
| 12191 | ISPLSSPCSSPLQGTPASSLVSK2.0022E+22                   | sp Q14432 PDE3A_HUMAN |
| 12192 | WLKSPTPIDPEK20000000000                             | sp Q08AD1 CAMP2_HUMAN |
| 12193 | SQSLNIR200000                                       | sp 000443 P3C2A_HUMAN |
| 12194 | MPLLELGGETTPPLSTERSPEAVGSECPSR2.2E+21               | sp Q9Y4K1 AIM1_HUMAN  |
| 12195 | MALEVGMEDGQLSDSDMTVAPSDRPLQLPK1.0000001000002E+33   | sp Q9H814 PHAX_HUMAN  |
| 12196 | VKEEIKSDSSPLPSEK20220002000                         | sp 014646 CHD1_HUMAN  |
| 12197 | SRSRSTPPSSAGLGSNSAPPIDSR220000202000000000          | sp Q8IWX8 CHERP_HUMAN |
| 12198 | APELNTSSPSLK200000                                  | sp Q9UN79 SOX13_HUMAN |
| 12199 | HSLASSEYPVR20030000                                 | sp P51570 GALK1_HUMAN |
| 12200 | PGPTPSGTNVGSSGRSPSK200000000                        | sp P60468 SC61B_HUMAN |
| 12201 | LEGSDVDSELEDRVDGK2000200000000000                   | sp Q92614 MY18A_HUMAN |
| 12202 | DYTGCTSESLSPVK2000020000                            | sp 095297 MPZL1_HUMAN |
| 12203 | SQRSNSPLPVPPSK2020200000000000                      | sp Q13247 SRSF6_HUMAN |
| 12204 | GSLPQLVSPIVSR200                                    | sp 075970 MPDZ_HUMAN  |
| 12205 | LRKDLFSSR2200                                       | sp Q9BWF2 TRAI1_HUMAN |



|       |                                                             |    |         |             |
|-------|-------------------------------------------------------------|----|---------|-------------|
| 12206 | SPPGPAGSSPK200000002000                                     | sp | Q9H9D4  | ZN408_HUMAN |
| 12207 | NDKSEEEQSSSVK220000                                         | sp | P07910  | HNRPC_HUMAN |
| 12208 | TPTSSPASSPLVAK20000000                                      | sp | Q14684  | RRP1B_HUMAN |
| 12209 | HISECFPSPGGQLAEVHSVSPEQGA20000000                           | sp | Q5T1V6  | DDX59_HUMAN |
| 12210 | TPTSPLK220000                                               | sp | Q06264  | SMCA5_HUMAN |
| 12211 | SKSYSPGRR2023000000                                         | sp | Q8IWX8  | CHERP_HUMAN |
| 12212 | GHYTEGAELVDAVLVDVVR3200000000000000                         | sp | Q9BUF5  | TBB6_HUMAN  |
| 12213 | GEAVLRPGLDAEPELSPEEQ2000000                                 | sp | P04350  | TBB4A_HUMAN |
| 12214 | SRSPLDKDTYPPSASVVGASVGGHR300002000000000000                 | sp | Q9BRJ6  | CG050_HUMAN |
| 12215 | SLDGAEFSPASVSENHDAGPDGDKR2020000000000000                   | sp | Q96T37  | RBM15_HUMAN |
| 12216 | EKSATRPSPPER200002020000                                    | sp | Q9H4G0  | E41L1_HUMAN |
| 12217 | TPNNVSTPAPSPDASQLASSLSSQK2. 2E+20                           | sp | Q9UQ35  | SRRM2_HUMAN |
| 12218 | RISSSSVQPCSEEVSTPQDSLAAQCK2E+22                             | sp | Q8WWI1  | LM07_HUMAN  |
| 12219 | QRLATFFPRK2000000                                           | sp | P42694  | HELZ_HUMAN  |
| 12220 | NGLPGSRPGSPER200020000                                      | sp | Q9Y5P3  | RA12_HUMAN  |
| 12221 | STSAPQMSPGSSDNQSSSPQAQQK1. 000000002E+19                    | sp | Q92993  | KAT5_HUMAN  |
| 12222 | YIASVQGSTPSPR20000002000                                    | sp | Q14157  | UBP2L_HUMAN |
| 12223 | SRSLSSPR202020000                                           | sp | P49792  | RBP2_HUMAN  |
| 12224 | HSPATISSSTR20000000000                                      | sp | Q9UQ35  | SRRM2_HUMAN |
| 12225 | AASPESASTPESLQAR2002002200000000                            | sp | Q015119 | TBX3_HUMAN  |
| 12226 | AKSPAPGLASGDRPPSVSSVHSEGDCNR2E+26                           | sp | Q96BT3  | CENPT_HUMAN |
| 12227 | SGSMEEDVDTSPGGDYITSPSSPTSSSR20000000                        | sp | Q9Y618  | NCOR2_HUMAN |
| 12228 | ESSPFLSPLEASR200000000000                                   | sp | P08651  | NF1C_HUMAN  |
| 12229 | SKPNLPSESRSR2000200                                         | sp | Q9UP95  | S12A4_HUMAN |
| 12230 | SDILKDPPEANSIQSANATK2000200200000000                        | sp | Q08170  | SRSF4_HUMAN |
| 12231 | IKEEPEVVDSSPPDSPASSPCSPPLK220002000200000000                | sp | Q8N488  | RYBP_HUMAN  |
| 12232 | SLPLISASR2000000000                                         | sp | P17544  | ATF7_HUMAN  |
| 12233 | VQSTADIFGDEEGDLFK2000000000000000                           | sp | Q5VV41  | ARHGG_HUMAN |
| 12234 | TGGSSPEALHRPYGCDVEPQALNEAIR2E+23                            | sp | Q641Q2  | FA21A_HUMAN |
| 12235 | LHSYSSPSTK200200000                                         | sp | Q5SNT6  | FA21B_HUMAN |
| 12236 | NALFPEVFSPTPDENSQNSR200000000000                            | sp | Q9Y4E1  | FA21C_HUMAN |
| 12237 | LSLQHTQQNADGQEDGESERNSNSSGDPGR2000000000                    | sp | P42684  | ABL2_HUMAN  |
| 12238 | DPNSATATAPPSPLK20000                                        | sp | Q96T37  | RBM15_HUMAN |
| 12239 | YSPKTPPR20020000                                            | sp | Q8IVT2  | MTSP_HUMAN  |
| 12240 | ASQPDLDVTPTSSKPQPK200000020000000000                        | sp | Q075052 | CAPON_HUMAN |
| 12241 | DSAGVPAPAPDSALDSAPTASAPAPAPALAQAPALSPSLASAPPEAK200000000000 | sp | Q92766  | RREB1_HUMAN |
| 12242 | SRSSSVGSSSYPISPAISR22200220000000000000                     | sp | P49792  | RBP2_HUMAN  |
| 12243 | LSDCEGSVHCEVPSEYACEGKPPDPDSEGSTK2002000                     | sp | Q7Z3J3  | RGPD4_HUMAN |
| 12244 | EKPCVSPTVGEK200000                                          | sp | A6NKT7  | RGPD3_HUMAN |
| 12245 | GGHSSVSTESESSSFHSS200000000000                              | sp | PODJD1  | RGPD2_HUMAN |
| 12246 | GVQKPAGPSTSPDGNSR20000000                                   | sp | PODJD0  | RGPD1_HUMAN |
| 12247 | YSPSPPKR202000000                                           | sp | P46013  | KI67_HUMAN  |
| 12248 | CLLADLPLPELPGDDLSKSPEEK20000000                             | sp | Q7Z2T5  | TRM1L_HUMAN |
| 12249 | TRMTELSR201000000                                           | sp | Q15149  | PLEC_HUMAN  |
| 12250 | RQSSSYDDPWK23000000                                         | sp | Q9NSI6  | BRWD1_HUMAN |
| 12251 | SSLSSHQSQIYR2202200000000000                                | sp | Q68DQ2  | CRBG3_HUMAN |
|       |                                                             | sp | P61073  | CXCR4_HUMAN |
|       |                                                             | sp | Q86YV5  | SG223_HUMAN |
|       |                                                             | sp | Q8IYB3  | SRRM1_HUMAN |
|       |                                                             | sp | Q14004  | CDK13_HUMAN |
|       |                                                             | sp | Q8IVH4  | MMAA_HUMAN  |
|       |                                                             | sp | Q96D71  | REPS1_HUMAN |
|       |                                                             | sp | Q015027 | SC16A_HUMAN |

|       |                                                      |                       |
|-------|------------------------------------------------------|-----------------------|
| 12252 | SEAEDLAEPLSSTEGVAPLSQAPSPLAIPAIAIK2000000000         | sp Q6P4R8 NFRKB_HUMAN |
| 12253 | ITSPLMEPSSIEK2000100000000                           | sp P28066 PSA5_HUMAN  |
| 12254 | SDGAPASDSKPGSSEAAPSSK2000000000000000                | sp P80723 BASP1_HUMAN |
| 12255 | TDSEKPPFRGSQSPKR20000000020000                       | sp Q9Y2W1 TR150_HUMAN |
| 12256 | SSPASSPELPWRPR2200220000000000                       | sp Q9NYF3 FA53C_HUMAN |
| 12257 | NATQPPNAEEESGSSSASEEEDTKPKPTK20222020000000000000    | sp Q68E01 INT3_HUMAN  |
| 12258 | RSLTNSHLEK20000000                                   | sp Q9H2H9 S38A1_HUMAN |
| 12259 | NWTEDEMEGGISSPVK20000                                | sp P08651 NFIC_HUMAN  |
| 12260 | ASVLDTSMSAGSGSPSK20000                               | sp Q9UPQ0 LIMC1_HUMAN |
| 12261 | SFQDYTGQK2000000000                                  | sp Q9NP64 NO40_HUMAN  |
| 12262 | TTSRSPVLSR2002000000                                 | sp 095819 M4K4_HUMAN  |
| 12263 | IKEEPEVEVDSSPPDSPASSPCSPPLK2200020022000000000       | sp P17544 ATF7_HUMAN  |
| 12264 | GEGDAPFSEPGTTSTQRPSSPETATK2.0002E+19                 | sp Q9UQ35 SRRM2_HUMAN |
| 12265 | LPSSPASPSPK2000                                      | sp Q9H4G0 E41L1_HUMAN |
| 12266 | SSPINPAQSGSPNHVDSAYFPGSSTSSSSDNDEGSGGATNHISGNK2E+22  | sp Q9NZB2 F120A_HUMAN |
| 12267 | TPSPESHRSAPGSEER202000002000000000                   | sp Q66K74 MAP1S_HUMAN |
| 12268 | FHSSDSEEEHK22020000000                               | sp Q96ST2 IWS1_HUMAN  |
| 12269 | ERFSPRHELSPQK2000000200000                           | sp Q9BXP5 SRRT_HUMAN  |
| 12270 | QRSVSPYSR20200000                                    | sp Q9NYV4 CDK12_HUMAN |
| 12271 | SRTASGSSVTSLDGTR2022022000000                        | sp Q92597 NDRG1_HUMAN |
| 12272 | SGTTPRQGSITSPQANEQSVTPQRR2.02000002E+25              | sp Q9UQ35 SRRM2_HUMAN |
| 12273 | ASPAPGSGHPEGPGAHLDMNSLDR20000000000000000000         | sp 094826 TOM70_HUMAN |
| 12274 | SQSPHYFR2000000000                                   | sp Q9UKJ3 GPTC8_HUMAN |
| 12275 | DKDQPPSPSPPPQSEALSSTR2000000000000000                | sp Q7L1V2 MON1B_HUMAN |
| 12276 | TSLMSAESPTPR200200000                                | sp P49810 PSN2_HUMAN  |
| 12277 | DTLSNPQSPQSPYNSPKPQH2.02000000020002E+21             | sp Q96PU5 NED4L_HUMAN |
| 12278 | GADNDGSGSESGYTTTPK20300000                           | sp Q7Z417 NUFP2_HUMAN |
| 12279 | QICVVMLETLSQSPPK2000000                              | sp Q15366 PCBP2_HUMAN |
| 12280 | KSDGACDPSDDKENSQIAQDHQK200002000000000000            | sp Q9UIG0 BAZ1B_HUMAN |
| 12281 | RPTETNPVTSNSDEECNETVK20000200000000000000            | sp P46100 ATRX_HUMAN  |
| 12282 | KPPAPPSPVQSQSPSTNWSPAVPVKK2.00000000002E+20          | sp Q8IYB3 SRRM1_HUMAN |
| 12283 | ESSPEKEAEEGCEKESEEGCPK2E+22                          | sp 043719 HTSF1_HUMAN |
| 12284 | SSDQDSTNKEAEAAGVKPAGVRPR2.00002E+23                  | sp Q92625 ANS1A_HUMAN |
| 12285 | TLETQLAPDCCPSDQDPAPAHPSPHASP MNK2.00000000000002E+19 | sp Q9BUR4 WAP53_HUMAN |
| 12286 | RPACDPEPEGSGSSSDEGCTVVRPEK222000020000000            | sp 015541 R113A_HUMAN |
| 12287 | AGLGSPPERPKTSPGSPR200000022000000                    | sp Q9H6F5 CCD86_HUMAN |
| 12288 | SDGEAKPEPSPSPR202000                                 | sp P26358 DNMT1_HUMAN |
| 12289 | RGSQSDSDSLHSQTLSEDER20002000000000000000             | sp Q9UPZ3 HPS5_HUMAN  |
| 12290 | SPGLPMSDLK20000000000                                | sp Q6WCQ1 MPRIP_HUMAN |
| 12291 | LSEAVWQPEEHYSSSPEK20000                              | sp Q9Y485 DMXL1_HUMAN |
| 12292 | AEEHLSSGGLAK2000000                                  | sp Q52LW3 RHG29_HUMAN |
| 12293 | QSSSRFNLSK220000000                                  | sp Q14738 2A5D_HUMAN  |
| 12294 | EPLENSASESDTELPEKER2020220000000000                  | sp P78337 PITX1_HUMAN |
| 12295 | AEPKPEVVDSTESIPVSDSDAMVDDPNDEDFVPRPR2.0002001E+23    | sp Q14202 ZMYM3_HUMAN |
| 12296 | TPPPGQDTQQFHEK2000000000000000                       | sp Q12802 AKP13_HUMAN |
| 12297 | SMVSPVPSPTGTISVPNSCPASPR2000200000000                | sp P85037 FOXK1_HUMAN |
| 12298 | QPNLSSEEPPTSEDQVGR20220000000000000000               | sp 015013 ARHGA_HUMAN |
| 12299 | GVEPSPSPIKPGDIK2000000000                            | sp Q92890 UFD1_HUMAN  |
| 12300 | SDGEAKPEPSPSPR200000000002000                        | sp P26358 DNMT1_HUMAN |
| 12301 | RAPSTSPSFEGTQETYTVAHEENV2.2E+21                      | sp Q9BUT9 F195A_HUMAN |
| 12302 | CSVSLSNVEAR20000000000                               | sp P47712 PA24A_HUMAN |
| 12303 | TEVSETARPSPDTR20000000000                            | sp 075132 ZBED4_HUMAN |

|       |                                                  |                       |
|-------|--------------------------------------------------|-----------------------|
| 12304 | GGEKTPVSGSLKSPVPR2000000200000                   | sp Q8NI27 THOC2_HUMAN |
| 12305 | RSPSPAPPPRR20200000000                           | sp Q8IYB3 SRRM1_HUMAN |
| 12306 | EESEESDDDMGFLFD200200010000000                   | sp P05387 RLA2_HUMAN  |
| 12307 | VQIPVSRPDPPEVSDNEEDSYDEEIHDP3000000000           | sp P05386 RLA1_HUMAN  |
| 12308 | TSSKESPPIPSPTSDR2200220002000000                 | sp Q07157 ZO1_HUMAN   |
| 12309 | SPLEHSSPEKEAPSPEK2200000020000                   | sp Q01082 SPTB2_HUMAN |
| 12310 | NWDSLIPDEMPDSPIQEK2000000                        | sp Q13459 MYO9B_HUMAN |
| 12311 | RGSQSDEDECSLHSQTLSEDER2000202002000000000        | sp 095613 PCNT_HUMAN  |
| 12312 | SGSDAGEARPPTPASPR200000000000002000              | sp Q9UPZ3 HPS5_HUMAN  |
| 12313 | STPLASPSPPGRSPQR2000000020000                    | sp Q96FS4 SIPA1_HUMAN |
| 12314 | GSISTPNSPVK20000020000                           | sp Q8WYP5 ELYS_HUMAN  |
| 12315 | NTSVGSTSTGVESILEPCDEIEQK2000200000000000         | sp Q96AY4 TTC28_HUMAN |
| 12316 | YNAVLGFGALTPTSPQSSHPDSPAENEK200000000002000000   | sp Q5T8I3 F102B_HUMAN |
| 12317 | LDSSCLESVK20000000                               | sp Q96BD5 PF21A_HUMAN |
| 12318 | ATSPLCTSTASMVSSSPSTPSNIPQKPSQPAK2E+31            | sp Q9NZJ0 DTL_HUMAN   |
| 12319 | LYTSAPNTSQGK2000000000                           | sp P30622 CLIP1_HUMAN |
| 12320 | GSEGTPDSLHKAPK20000000                           | sp Q5QJE6 TDIF2_HUMAN |
| 12321 | SSQPSPTAVPASDSPPTK2020000000000000               | sp 075145 LIPA3_HUMAN |
| 12322 | MQAGQISVQSSEPSSPEPGK2000000000000000             | sp Q3KQU3 MA7D1_HUMAN |
| 12323 | DTHEDHDTSTENTDESNHDPQFEPVIVSLPEQEIK2.000002E+33  | sp P37275 ZEB1_HUMAN  |
| 12324 | RHSSVSDSQCEPPSVGTEYSQGASPPQHQHLK3200000000000000 | sp P43487 RANG_HUMAN  |
| 12325 | LPSSPASPSPK2000200000                            | sp P39880 CUX1_HUMAN  |
| 12326 | HDSGGLPLTPR20020002000                           | sp Q9H4G0 E4IL1_HUMAN |
| 12327 | SFVPEEEK200000000                                | sp Q96MH2 HEX12_HUMAN |
| 12328 | APSASDSKADSDGAKPEPVAMAR2.00020002E+21            | sp 094880 PHF14_HUMAN |
| 12329 | TNPPTQKPPSPMSG20010000                           | sp Q7Z4V5 HDGR2_HUMAN |
| 12330 | SAQGSSSPVPSMVQK20000010000                       | sp Q8IZP0 ABI1_HUMAN  |
| 12331 | MSHSSSDTDINEIHTNHK2022220200000000000            | sp P35658 NU214_HUMAN |
| 12332 | YPRPASVPPSPSLSRHSSPHQSEDEEDPR2.000202020022E+24  | sp P46100 ATRX_HUMAN  |
| 12333 | HTSCSSAGNDSKPVQEAPSVAR200002000000000000         | sp P13807 GYS1_HUMAN  |
| 12334 | TDSQSVRHSPVLAQK200002200000000000                | sp Q9P246 STIM2_HUMAN |
| 12335 | WLPSSPSGVAK20000000                              | sp Q9NQS7 INCE_HUMAN  |
| 12336 | SHHAPMSPGSSGGGQPLAR200000000000                  | sp Q8IWI9 MGAP_HUMAN  |
| 12337 | SRSTTELDYSTNK20000000000000                      | sp 014497 ARI1A_HUMAN |
| 12338 | DQKLELDDR2000000                                 | sp Q8WWI1 LMO7_HUMAN  |
| 12339 | SPVSGDTSR22000                                   | sp P63027 VAMP2_HUMAN |
| 12340 | SRPQGLTEAEQR20000000000000                       | sp Q15836 VAMP3_HUMAN |
| 12341 | SPTTPIDPEK20020000000                            | sp P23763 VAMP1_HUMAN |
| 12342 | SPTSPSPPR20200020000                             | sp TAU_HUMAN          |
| 12343 | FSEMNMNGDEDVDLPEVDGADDDSDSDEK2.011001E+32        | sp P10636 TAU_HUMAN   |
| 12344 | DELADEIANSSGK2000                                | sp Q00653 NFKB2_HUMAN |
| 12345 | RLSSIKR220000                                    | sp Q08AD1 CAMP2_HUMAN |
| 12346 | SPSILAAK2000000                                  | sp Q8IYB3 SRRM1_HUMAN |
| 12347 | RMSPKPELTEEK200000                               | sp Q15185 TEBP_HUMAN  |
| 12348 | GTFSDQELDAQSLDDEDDNMHHAVYPAVNR2.00000002E+27     | sp P35579 MYH9_HUMAN  |
| 12349 | TSTPSPQPSKR20020000000                           | sp 075558 STX11_HUMAN |
| 12350 | SNSPLPSIQLPQSPSASKK2000000000020000000           | sp Q569K4 Z385B_HUMAN |
| 12351 | SPHRSSPSDTRPK20000200000000                      | sp P41208 CETN2_HUMAN |
| 12352 | SRSRTPPVTR20200000000                            | sp Q9P270 SLAI2_HUMAN |
| 12353 | RSSPPPPSGSSSR200                                 | sp Q8IY18 SMC5_HUMAN  |
|       |                                                  | sp Q08174 PCDH1_HUMAN |
|       |                                                  | sp Q8IWS0 PHF6_HUMAN  |
|       |                                                  | sp Q9UQ35 SRRM2_HUMAN |
|       |                                                  | sp Q5VUA4 ZN318_HUMAN |

|       |                                                   |                       |
|-------|---------------------------------------------------|-----------------------|
| 12354 | NTSVGSTSTGVESILEPCDEIEQK2.002E+22                 | sp Q5T8I3 F102B_HUMAN |
| 12355 | QQAAYYAQTSPQGMPQHPPAPQGQ3.00000001E+19            | sp Q96AE4 FUBP1_HUMAN |
| 12356 | SKSNPDFLK20000000                                 | sp Q6WCQ1 MPRIP_HUMAN |
| 12357 | TGSNISGASSDISLDEQYK220000000000                   | sp P22059 OSBP1_HUMAN |
| 12358 | SSPVPPVPER2000000000                              | sp Q6ZRV2 FA83H_HUMAN |
| 12359 | RPSASSPNNNTAAK20000                               | sp 075151 PHF2_HUMAN  |
| 12360 | SAPASPTHPLMSPR2000000000010000                    | sp P85037 FOXK1_HUMAN |
| 12361 | STTPPPAEPVSLPQEPPK200000000000000000              | sp Q9UN86 G3BP2_HUMAN |
| 12362 | SEVQQPVHPKPLSPDSRASSLSESSPPK20020022020200000     | sp Q9UHB6 LIMA1_HUMAN |
| 12363 | DISGSPSKK200000                                   | sp Q96GX9 MTNB_HUMAN  |
| 12364 | RHSSPSSPTSPK20020000                              | sp 094921 CDK14_HUMAN |
| 12365 | SSSPLPTVQLHPQSPTAGK200000000000000000             | sp 060245 PCDH7_HUMAN |
| 12366 | IHRASDPGLPAEPPK200000000000                       | sp P27708 PYR1_HUMAN  |
| 12367 | TPASTPVSQTPQASPMIER200000200000000000             | sp Q9UHR4 BI2L1_HUMAN |
| 12368 | STPLASPSPPGRSPQR220000000200020000                | sp Q8WYP5 ELYS_HUMAN  |
| 12369 | SSPELPPSGSTTSGSR200000000000000000                | sp Q96D31 CRCM1_HUMAN |
| 12370 | TQSEESRPSLQQPATSTTETPASPAHTTPQTQSTSGR2.000002E+29 | sp P15336 ATF2_HUMAN  |
| 12371 | YLSFTPPEK20200000                                 | sp Q13177 PAK2_HUMAN  |
| 12372 | DGSGTPSRHSLSGSSPGMK20020202000000                 | sp Q9UQ35 SRRM2_HUMAN |
| 12373 | VSDSESEGPQKGPASDSETEDASR2.0202000000002E+23       | sp Q96ST2 IWS1_HUMAN  |
| 12374 | RGGADTYSVPSVLSR202002000000                       | sp P14543 NID1_HUMAN  |
| 12375 | SRSRSPPVSK200020000000                            | sp Q01130 SRSF2_HUMAN |
| 12376 | GVSMSLPSSPLLPR2100002000000                       | sp Q9C0D5 TANC1_HUMAN |
| 12377 | NSVLSDPGLDSPRTSPVIMAR200000200000000000           | sp 015085 ARHGB_HUMAN |
| 12378 | GGPASVPSSSPGTSVK200000000                         | sp 043237 DC1L2_HUMAN |
| 12379 | TPLSSLSATSNNSTVACIDR220000000000000000            | sp P00533 EGFR_HUMAN  |
| 12380 | SPALHGTPTAGCGSR2000000020000000                   | sp Q8IY92 SLX4_HUMAN  |
| 12381 | SSGKTPETLVPTAPK2002000000000000                   | sp Q14676 MDC1_HUMAN  |
| 12382 | KHSPSPPTPTESR20000000020000                       | sp Q92922 SMRC1_HUMAN |
| 12383 | DLGTQNHTSELILSSPPGQK2000000                       | sp Q9ULD2 MTUS1_HUMAN |
| 12384 | SELESR2000000                                     | sp Q92974 ARHG2_HUMAN |
| 12385 | LDVTILSPSR20000                                   | sp 075369 FLNB_HUMAN  |
| 12386 | RMSGEP1QTVESIR20000000000000                      | sp Q5VT52 RPRD2_HUMAN |
| 12387 | SRSKSPFR202020000                                 | sp Q14498 RBM39_HUMAN |
| 12388 | HCGLSLSTPPGK20200000                              | sp Q71F23 CENPU_HUMAN |
| 12389 | SPNREWEVLQAPHQVITNLPEGVR2E+25                     | sp 075376 NCOR1_HUMAN |
| 12390 | TLSPTPASATAPTSQGIPTSDEESTPKK2E+28                 | sp Q9NQS7 INCE_HUMAN  |
| 12391 | GGPASVPSSSPGTSVK20000000                          | sp 043237 DC1L2_HUMAN |
| 12392 | TKPTQAAGPSSPQKPPTPEETK2000200                     | sp P18887 XRCC1_HUMAN |
| 12393 | VASSPVMVSNPATR200010000000                        | sp P51610 HCFC1_HUMAN |
| 12394 | RHSSDINHLVTQGRESPEGSYTDANQEV2.0000002E+27         | sp Q5TON5 FBP1L_HUMAN |
| 12395 | SRSPSSPELNK2020200000000                          | sp Q9UQ35 SRRM2_HUMAN |
| 12396 | LDAEPKPCSDTNSDSPDEGLDHNHIK2.000202E+19            | sp Q13129 RLF_HUMAN   |
| 12397 | ESEKSLENETLNKEEDCHSPTSKPPKPDQPLK2.00002E+28       | sp P23588 IF4B_HUMAN  |
| 12398 | SSESPNHSLHNEVADDSQLEK2.2E+22                      | sp Q9ULH0 KDIS_HUMAN  |
|       |                                                   | sp P49792 RBP2_HUMAN  |
|       |                                                   | sp Q7Z3J3 RGPD4_HUMAN |
| 12399 | EDALDDSVSSSVHASPLASSPVRK2.00000000000002E+19      | sp A6NKT7 RGPD3_HUMAN |
|       |                                                   | sp Q99666 RGPD5_HUMAN |
|       |                                                   | sp 014715 RGPD8_HUMAN |
| 12400 | NLSPTAVINITSEK2000000000000                       | sp Q92870 APBB2_HUMAN |
| 12401 | GLQVDLQSDGAAAEDIVASEQSLGQK2E+19                   | sp P33991 MCM4_HUMAN  |
| 12402 | SRSRSPLAIR20202000000                             | sp Q9UQ35 SRRM2_HUMAN |
| 12403 | QLGDSSGEGPEFVEEEEEVALRSDSEGSYTPGKK20200200000000  | sp Q14839 CHD4_HUMAN  |

|       |                                              |                       |
|-------|----------------------------------------------|-----------------------|
| 12404 | GSSDGRGSDSESDLPHR20002000000                 | sp Q9UPQ0 LIMC1_HUMAN |
| 12405 | FNDPSGCAPSPGAYDVK200000000                   | sp 075330 HMMR_HUMAN  |
| 12406 | AGSSPCLGSSSAASSPPPPASR200000000              | sp Q6ZRS2 SRCAP_HUMAN |
| 12407 | AISSDDSSDEDK2200220000000                    | sp Q6PD62 CTR9_HUMAN  |
| 12408 | SSWLSTEGGR2002000000                         | sp Q9BXF6 RFIP5_HUMAN |
| 12409 | LEDAESSNPNLQSLSTDALPSASK2.000002E+19         | sp Q9Y294 ASF1A_HUMAN |
| 12410 | QSPGHQSPLASPK20002000                        | sp Q8N1G0 ZN687_HUMAN |
| 12411 | SAVSPDLHITPIYEGR2000000000000                | sp Q99569 PKP4_HUMAN  |
| 12412 | HSSISPSTLTLK20000002000                      | sp Q14004 CDK13_HUMAN |
| 12413 | TRSPSPDILER2020000000000                     | sp Q13523 PRP4B_HUMAN |
| 12414 | SPQTLAPVGEDAMKTPSPAEDAREPEAK202000000000000  | sp Q92797 SYMPK_HUMAN |
| 12415 | APAGPSLEETSVSPPK2000                         | sp Q6AI08 HEAT6_HUMAN |
| 12416 | RVSSDEEHTVDSICSDMK2000020000000000           | sp Q70CQ2 UBP34_HUMAN |
| 12417 | SPSPPTQHTGQPPGQPSAPLSAPR20000000000          | sp Q68EM7 RHG17_HUMAN |
| 12418 | VSVTPPEESQNSDTPPRPDR200002000000000000       | sp Q05209 PTN12_HUMAN |
| 12419 | LTPVSLNSPIKGADCQEVQDK2.0000002E+22           | sp P46100 ATRX_HUMAN  |
| 12420 | TNLTSQSSTNLPGSPGSPGSPGSPGSPGSPK2.002002E+19  | sp Q6IN85 P4R3A_HUMAN |
| 12421 | AVIVSSPK2000                                 | sp Q14966 ZN638_HUMAN |
| 12422 | LKSVEDEMDSPGEEPFTYTGQR2.00001E+20            | sp Q12857 NF1A_HUMAN  |
| 12423 | TPSPKEEDEEPESPPEKK20000000002000000          | sp Q9H1E3 NUCKS_HUMAN |
| 12424 | SGEQITSSPVSPK20000000002000                  | sp 043314 VIP2_HUMAN  |
| 12425 | SRSRTSPITR20200200000                        | sp Q9UQ35 SRRM2_HUMAN |
| 12426 | LSSSATLLNSPDR200000000                       | sp Q14244 MAP7_HUMAN  |
| 12427 | AKSQYSGQLHEVR200000000000                    | sp Q9BXB5 OSB10_HUMAN |
| 12428 | SSPAELSSSQHLLR2000020000000000               | sp Q9UQC2 GAB2_HUMAN  |
| 12429 | AGDTSQEGHSLEEK200000000000                   | sp Q99607 ELF4_HUMAN  |
| 12430 | LSPSPSSR20000000                             | sp Q03252 LMNB2_HUMAN |
| 12431 | RHSSQIEGVR220000000                          | sp P20700 LMNB1_HUMAN |
| 12432 | GPSSPPTTAPMR20000000100                      | sp Q6RI45 BRWD3_HUMAN |
| 12433 | ASGGAQSPLR20000                              | sp Q9NXL9 MCM9_HUMAN  |
| 12434 | LSLQHTQQNADGQEDGESERNSNSSGDPGR22000000       | sp Q6NXT1 ANR54_HUMAN |
| 12435 | TQSLSALPK20000000                            | sp 075052 CAPON_HUMAN |
| 12436 | YSPTSPTYSPK32000000                          | sp Q96RK0 CIC_HUMAN   |
| 12437 | ATKMLTATAMPTVATSVQSPYRSTK220020302000        | sp P24928 RPB1_HUMAN  |
| 12438 | NQSHSSPSVSPSR202202020000                    | sp Q9UPU5 UBP24_HUMAN |
| 12439 | ISDSESEDPPRHQASDSENEELPKPR2.020000000002E+23 | sp Q7Z6E9 RBBP6_HUMAN |
| 12440 | SSSVGSSSYPIPAVSR220000000000000              | sp Q96ST2 IWS1_HUMAN  |
| 12441 | SPVSPGSSSPQLQVK20000000020000000             | sp Q15149 PLEC_HUMAN  |
| 12442 | GTPPLTPSDSPQTR2000000000                     | sp Q8N3F8 MILK1_HUMAN |
| 12443 | GVGSGPHPPDTQQPSPSK200                        | sp Q6NZY4 ZCHC8_HUMAN |
| 12444 | SRSRSGPLR20200200000                         | sp Q68CZ2 TENS3_HUMAN |
| 12445 | SPSSESPQHPTPPARPR200000000000000000          | sp Q9UQ35 SRRM2_HUMAN |
| 12446 | SKSQSSGSSATHPIVPGAR2200000000000000          | sp 014733 MP2K7_HUMAN |
| 12447 | SCDEPLTPPHSPTSMLQLIHDPVSPR220000000002000    | sp Q9Y4H2 IRS2_HUMAN  |
| 12448 | SPQTPSQMVPLPSANPPGPK2.0000201E+21            | sp Q9Y2K7 KDM2A_HUMAN |
| 12449 | ADGSPVNTGVETTTPSK20000020000                 | sp Q86UU0 BCL9L_HUMAN |
| 12450 | NKQDDLNCEPLSPHNITPEPVSK2000020000000         | sp P0CF74 LAC6_HUMAN  |
| 12451 | DRGDAYYDTPRHSYEQR2000000                     | sp Q6VMQ6 MCAF1_HUMAN |
| 12452 | KGSRSDTSAR20000                              | sp P49760 CLK2_HUMAN  |
| 12453 | SRSSSVGSSSYPIPAVSR220000000000000000         | sp Q5SYE7 NHSL1_HUMAN |
|       |                                              | sp Q15149 PLEC_HUMAN  |

|       |                                                    |                       |
|-------|----------------------------------------------------|-----------------------|
| 12454 | SRSYSR20230000                                     | sp Q8IYB3 SRRM1_HUMAN |
|       |                                                    | sp Q13595 TRA2A_HUMAN |
|       |                                                    | sp P62995 TRA2B_HUMAN |
|       |                                                    | sp Q07955 SRSF1_HUMAN |
| 12455 | SATSTSASPTLR220000000                              | sp 075061 AUXI_HUMAN  |
| 12456 | HCGLSLSSTPPGK2020200000                            | sp Q71F23 CENPU_HUMAN |
| 12457 | FSPSQVPIQTR20000000000                             | sp Q08AD1 CAMP2_HUMAN |
| 12458 | QDKPMDTSVLSEEGEPFQK20020000000000                  | sp Q12888 TP53B_HUMAN |
| 12459 | SPAGPAATPAQAQAASPR2.0000002E+19                    | sp Q13428 TCOF_HUMAN  |
| 12460 | WSDQGAQTSR20000000000                              | sp Q9COC2 TB182_HUMAN |
| 12461 | SLDGAEFRPASVSENHDAGPDGDK2.000000000002E+25         | sp Q9H4G0 E41L1_HUMAN |
| 12462 | LQDSSDPDTGSEEGSSRLSPPHSPR20000200000000000         | sp Q92974 ARHG2_HUMAN |
| 12463 | SGSTSPLGFAR20000000                                | sp 075385 ULK1_HUMAN  |
| 12464 | TPMYGSQTPLQDGSR20000000000000000                   | sp 000267 SPT5H_HUMAN |
| 12465 | RSSDPWSNSHFPHEN20000000000000                      | sp Q92545 TM131_HUMAN |
| 12466 | TAPTSTIAPGVMASSPALPTQPAEEAAR2000000000000000       | sp P16220 CREB1_HUMAN |
| 12467 | DEPPPLSPALTPATPSSLDPFPSR2.00000002E+19             | sp Q7Z6Z7 HUWE1_HUMAN |
| 12468 | GYSPYSVSGSGSTAGSR300000000200200                   | sp Q15149 PLEC_HUMAN  |
| 12469 | GPSAAGEQEPDKESGASVDEVAR20020000000                 | sp P50579 MAP2_HUMAN  |
| 12470 | DDSHAEDSEDEKEDHK20000020000000000                  | sp Q9H1E3 NUCKS_HUMAN |
| 12471 | KSPSGPVKSPPLSPVGTTPVK2000220000                    | sp Q9BVC5 ASHWN_HUMAN |
| 12472 | EELMSSDLEETAGSTSIPKR22000000000000000              | sp 000567 NOP56_HUMAN |
| 12473 | GSISLNSSPR2000                                     | sp Q9NYL2 MLTK_HUMAN  |
| 12474 | HLSTPSSVSPEPQDSAK20000000000000000                 | sp Q9NZN5 ARHGC_HUMAN |
| 12475 | NSVQTPVENSTNSQHVK20000000000000000                 | sp Q9UHI6 DDX20_HUMAN |
| 12476 | SPDSCRPAALPCLPSTQDVPSR2E+19                        | sp Q9Y283 INVS_HUMAN  |
| 12477 | MQSLQLDCVAVPSSR1020000000000200                    | sp Q13546 RIPK1_HUMAN |
| 12478 | LHDFLAHSSESEETSSPPR20000000000000                  | sp P46100 ATRX_HUMAN  |
| 12479 | WGQPPSPTVPRPPDADPNTSPKPLEGRPER2.00000000000202E+25 | sp Q14839 CHD4_HUMAN  |
| 12480 | TISPSTSNLIPLMR2000200000100                        | sp 094806 KPCD3_HUMAN |
|       |                                                    | sp Q15139 KPCD1_HUMAN |
| 12481 | SYLEGSSDNQLK20000200000000                         | sp Q9UHI6 DDX20_HUMAN |
| 12482 | RASEELDGLFR20000000000                             | sp Q14814 MEF2D_HUMAN |
| 12483 | LVTSPQSEPPAPFPPPR20000000000000000                 | sp Q9H792 PEAK1_HUMAN |
|       |                                                    | sp Q9Y4E1 FA21C_HUMAN |
| 12484 | ETVSEAPLLFSDEEEK20000000                           | sp Q641Q2 FA21A_HUMAN |
|       |                                                    | sp Q5SNT6 FA21B_HUMAN |
| 12485 | VAEPGAEATSSSTGEESGSEHPPAVPMHNK2.0000002E+21        | sp Q14684 RRP1B_HUMAN |
| 12486 | GNVFSSTAAGTPNK20000020000                          | sp Q05682 CALD1_HUMAN |
| 12487 | SISNPPGSNLR20000000000                             | sp Q9H4A3 WNK1_HUMAN  |
| 12488 | ATRPASTSQPDSPDR2000020000                          | sp P20749 BCL3_HUMAN  |
| 12489 | SHMSGSPGPGSNTAPSTPVIGGSDKPGMEEK2E+21               | sp A0FGR8 ESYT2_HUMAN |
| 12490 | YTPTSPSYSPSSPEYTPTSPK2000000000000                 | sp P24928 RPB1_HUMAN  |
| 12491 | GSSPSIRPIQSGQSSSPVEK20020000000                    | sp Q92560 BAP1_HUMAN  |
| 12492 | QEPAAEYETPESPVPPARSPSPPK200000020200000            | sp P54259 ATN1_HUMAN  |
| 12493 | GPTTGEGALDLSDVHSPPKSPEGK2E+21                      | sp 095684 FR10P_HUMAN |
| 12494 | KRESESEDETTPAAPQLIK20200200000000000               | sp 060832 DKC1_HUMAN  |
| 12495 | IDAGTMAEPSASPSK20000000                            | sp Q8IXQ3 CI040_HUMAN |
| 12496 | KHHESI TPPSRSPK20020000000                         | sp Q8IY92 SLX4_HUMAN  |
| 12497 | TKPTQAAGPSSPKPPTPEETK2E+22                         | sp P18887 XRCC1_HUMAN |
| 12498 | TAMPSPGVSQNK102000000000                           | sp Q86UU0 BCL9L_HUMAN |
| 12499 | GEVPGGSAHYGGPSPEK20000                             | sp 094762 RECQ5_HUMAN |
| 12500 | AASPYSQRPASPTAIR200000002000000                    | sp Q99569 PKP4_HUMAN  |

|       |                                                     |                       |
|-------|-----------------------------------------------------|-----------------------|
| 12501 | NIIGSSPVADFSAIK20000000000                          | sp P42566 EPS15_HUMAN |
| 12502 | FSRSPIR2020000                                      | sp P18583 SON_HUMAN   |
| 12503 | DGYGSRDSYSSSRSDLYSSGR202200000000000                | sp P38159 RBMX_HUMAN  |
| 12504 | DTHEDHDTSTENTDESNHDPQFEP IVSLPEQEIK2. 002E+25       | sp P43487 RANG_HUMAN  |
| 12505 | QTESQIMGELPFTIASK200000000000000                    | sp 000370 LORF2_HUMAN |
| 12506 | TASPLPLRPDAPVEK20000000000000000                    | sp Q9HCK8 CHD8_HUMAN  |
| 12507 | SRPLATGPSSQSHQEK200000                              | sp Q96RL1 UIMC1_HUMAN |
| 12508 | NQKPSQVNGAPGSPTEPAGQK20000000                       | sp Q9BQG0 MBB1A_HUMAN |
| 12509 | KRSSLSPGR2020000                                    | sp Q9BUQ8 DDX23_HUMAN |
| 12510 | SRSRSTPPSSAGLGSNSAPPIPDSR2. 0202002E+24             | sp Q8IWX8 CHERP_HUMAN |
| 12511 | TESPATAAETASEELDNR2000000000                        | sp Q9NTJ3 SMC4_HUMAN  |
| 12512 | AASSSPGSPVASSPSR22000000000000000                   | sp Q92538 GBF1_HUMAN  |
| 12513 | QFSTASDHEQPGVSG200200000000000                      | sp Q66K14 TBC9B_HUMAN |
| 12514 | GSSDGRGSDSEDLPHR202000000                           | sp Q9UPQ0 LIMC1_HUMAN |
| 12515 | TISINSPK2000                                        | sp Q9P1Y6 PHRF1_HUMAN |
| 12516 | LSSLRASTSKSESSQK200022000000000                     | sp P62753 RS6_HUMAN   |
| 12517 | IGNEESDLEEACILPHSP INVDK20000000                    | sp 095714 HERC2_HUMAN |
| 12518 | ENSSPSVTSANLDHTKPCWYWDK2E+20                        | sp Q9BVR0 HRC23_HUMAN |
| 12519 | HKSGSMEEDVDTSPGGDYITSPSSPTSSSR1. 00000000000003E+25 | sp 075909 CCNK_HUMAN  |
| 12520 | SSSFSDTLEESSPIAAIFD TENLEK220000000000000           | sp P08651 NFIC_HUMAN  |
| 12521 | SPSESPQHIAHPER20000000000                           | sp P15924 DESP_HUMAN  |
| 12522 | APVPEPGLDLSLSPRPDSPQR20000200000                    | sp Q68DK2 ZFY26_HUMAN |
| 12523 | QRSHSGTSPDNTAPPPPPRPQPSHSR2. 0202E+25               | sp Q8TAP8 PPR35_HUMAN |
| 12524 | ISDSESEDPPRNQASDSENEELPKPR2. 0200000000202E+23      | sp Q96D71 REPS1_HUMAN |
| 12525 | RSPPADAIPK2000000000                                | sp Q96ST2 IWS1_HUMAN  |
| 12526 | LQDSSDPDTGSEEGSSRLSPHSPR2E+23                       | sp P18754 RCC1_HUMAN  |
| 12527 | KRSDAGSSTPTTSTR20002000000000                       | sp Q92974 ARHG2_HUMAN |
| 12528 | LYPPGDEEEAELADSSGLYHEGSPSPGSPWK20000                | sp P51532 SMCA4_HUMAN |
| 12529 | TSPINEDIR200000000                                  | sp Q8NCF5 NF2IP_HUMAN |
| 12530 | EYIPGQPPLSQSSDSSPTR20200000                         | sp Q9P2R6 RERE_HUMAN  |
| 12531 | SFISPIPSK2000000000                                 | sp P07814 SYEP_HUMAN  |
| 12532 | SIKPSDSPR2000                                       | sp Q9UGU0 TCF20_HUMAN |
| 12533 | GNVFSSPTAAGTPNKETAGLK200000020000000000             | sp Q92610 ZN592_HUMAN |
| 12534 | SRSRTPPVTR20202000000                               | sp Q05682 CALD1_HUMAN |
| 12535 | SEHSHSTTLPR200000220000                             | sp Q9UQ35 SRRM2_HUMAN |
| 12536 | QEKPAEKPAETPVATSPTATDSTSGDSSR2000000000000          | sp P16144 ITB4_HUMAN  |
| 12537 | GLSLSPQSPPER20000200000                             | sp P54727 RD23B_HUMAN |
| 12538 | LQSGVSLASK200000200                                 | sp Q7Z2Z1 TICRR_HUMAN |
| 12539 | SRSPSPAPEKK202000000000                             | sp Q09666 AHNK_HUMAN  |
| 12540 | VDKETNTETPAPSPTVVRPK20000000200000000               | sp Q8IYB3 SRRM1_HUMAN |
| 12541 | APSDTGSLSPPWDQDRR202000000000                       | sp Q8IX03 KIBRA_HUMAN |
| 12542 | STSPAGQHHSP ISSR220000000002200                     | sp 015320 CTGE5_HUMAN |
| 12543 | NESPPQVPVYNNSHK200000000000000                      | sp Q5T200 ZC3HD_HUMAN |
| 12544 | EHSPYGPSPLGWPSSETR20000200000000000                 | sp Q9UKL3 C8AP2_HUMAN |
| 12545 | TKPTQAAGPSSPQKPPTPEETK2E+19                         | sp 015320 CTGE5_HUMAN |
| 12546 | GYSSPEPDIQDSSGSEAQSVKPSTR2. 000000022E+22           | sp P18887 XRCC1_HUMAN |
| 12547 | GKPPAPSPR2000                                       | sp Q9BZF1 OSBL8_HUMAN |
| 12548 | DVYLSR2000                                          | sp Q9NP71 MLXPL_HUMAN |
| 12549 | YTPTSPSYSPSSPEYTPTSPK3. 0000003E+21                 | sp P38159 RBMX_HUMAN  |
| 12550 | NIVVDDITEQKPEPQDDGKSTESDVK20020000                  | sp Q96E39 RMXL1_HUMAN |
| 12551 | AGGGAQPSQTATGDPSDEDEDSLEEFVR2000200000000000000     | sp P24928 RPB1_HUMAN  |
| 12552 | SPRPQQDPARPQEPTMPPPETPSEGR2E+26                     | sp Q9Y4W2 LAS1L_HUMAN |
|       |                                                     | sp Q2YD98 UVSSA_HUMAN |
|       |                                                     | sp P29590 PML_HUMAN   |

|       |                                                  |                       |
|-------|--------------------------------------------------|-----------------------|
| 12553 | SLSPNHNTLQTLK200000000000                        | sp 075592 MYCB2_HUMAN |
| 12554 | LTNLSSNSDV2000000                                | sp Q13641 TPBG_HUMAN  |
| 12555 | DSGRGDSVSDSGSDALR202000000000                    | sp Q53EL6 PDCD4_HUMAN |
| 12556 | SPSDAGRSSGDESKKPLPSSSR2.0200002E+22              | sp Q8IVL1 NAV2_HUMAN  |
| 12557 | LASTSDIEEK2000000                                | sp O14974 MYPT1_HUMAN |
| 12558 | MDSLHDMLTDPLELGPCGDGHGTR2.0001E+22               | sp Q6P4R8 NFRKB_HUMAN |
| 12559 | RSSQPSPTAVPASDSPPTK20200000                      | sp Q3KQU3 MA7D1_HUMAN |
| 12560 | FDHESPGTDEDKSG220020000200                       | sp Q13427 PPIG_HUMAN  |
| 12561 | KRSELSQDAEPAGSQETK200000000000000000             | sp Q9BVJ6 UT14A_HUMAN |
| 12562 | STLESEKPGSPEAAETSPPSNIIDHCEK2E+27                | sp Q96T23 RSF1_HUMAN  |
| 12563 | RREEGPPPPSPDGASSDAEPEPPSGR20000000000000000000   | sp Q9NTJ3 SMC4_HUMAN  |
| 12564 | RSSLSHSHQSQIYR2000200000000000                   | sp O15027 SC16A_HUMAN |
| 12565 | NGFPHPPEPCNPSEAASEESNSEIEQEIPVEQK2.000200002E+21 | sp Q9NR30 DDX21_HUMAN |
| 12566 | RFTPPSTALSPGK200200000000                        | sp Q01196 RUNX1_HUMAN |
| 12567 | VCSSDSDSSLQVVK22000200000000                     | sp Q9NSI6 BRWD1_HUMAN |
| 12568 | LGPQNFIDETSDIENLLKEEEDYKEENNSK2E+21              | sp Q14692 BMS1_HUMAN  |
| 12569 | DSPAFPDSPWR20000                                 | sp Q9NQS7 INCE_HUMAN  |
| 12570 | TVSEKHQGK200000000                               | sp Q9NSC7 SIA7A_HUMAN |
| 12571 | VPEASSEPFDTSSPQAGR2000000                        | sp Q9H4I2 ZHX3_HUMAN  |
| 12572 | ISLEQPPNGSDTPNPEK202000000                       | sp Q9UHI6 DDX20_HUMAN |
| 12573 | SKSPSPPR202020000                                | sp Q9UKV3 ACINU_HUMAN |
| 12574 | YGNLTETRTLLAIQQQALR3.00020202E+19                | sp Q9Y2J4 AMOL2_HUMAN |
| 12575 | DGSGTPSRHSLSGSSPGMK200202000000000               | sp Q9UQ35 SRRM2_HUMAN |
| 12576 | SCTPSPDQISHRASLEDAPVDDLTR2.02000020002E+23       | sp Q7Z2W4 ZCCHV_HUMAN |
| 12577 | SESVVSGLDSPAK200000000                           | sp O14578 CTRO_HUMAN  |
| 12578 | QAAVTSTSLTIKSVFTR22220000000200                  | sp P20273 CD22_HUMAN  |
| 12579 | LSPERSDSESNENEPHLPHGVSQR2.2E+20                  | sp Q9BQ52 RNZ2_HUMAN  |
| 12580 | SDISDQEEDEESEGCVPVSNLSK20000000000000            | sp Q15154 PCM1_HUMAN  |
| 12581 | IEDVTPIPSDSTR2000                                | sp P62263 RS14_HUMAN  |
| 12582 | TSPPCSPANLSR200020000200                         | sp P49585 PCY1A_HUMAN |
| 12583 | HAPSLHGSTELLPLSR200000200                        | sp Q9H5N1 RABE2_HUMAN |
| 12584 | LLELTSSYSPDVSDYK200000000                        | sp P38432 COIL_HUMAN  |
| 12585 | DIFYYEDDSEGEDIEK200000000                        | sp Q15361 TTF1_HUMAN  |
| 12586 | KVATPPNQK200000000                               | sp Q6NUQ4 TM214_HUMAN |
| 12587 | STTTPPRCSPAR2000020000                           | sp Q6ZRS2 SRCAP_HUMAN |
| 12588 | LPQSSSESSPPSPQPTKVSRR2000200000                  | sp Q9UQ35 SRRM2_HUMAN |
| 12589 | SGSTSPLGFAR220000000                             | sp O75385 ULK1_HUMAN  |
| 12590 | RPPTPEAQSEEERSDEEPEAK20000200000000000000        | sp Q9BTK6 PAGR1_HUMAN |
| 12591 | YLVDTGKPNAGSEEISSEDELVEEK2.0000000022E+22        | sp Q9NY61 AATF_HUMAN  |
| 12592 | AEGEWEDQEALDYFSDKESGK2000                        | sp Q9NYF8 BCLF1_HUMAN |
| 12593 | IDGATQSSPAEPK2000000                             | sp Q32MZ4 LRRF1_HUMAN |
| 12594 | GPPASSPAPAPK200000000                            | sp Q15942 ZYX_HUMAN   |
| 12595 | EHPHSRSPSPEPR2020200000                          | sp Q9UDY2 ZO2_HUMAN   |
| 12596 | SQSPINCIRPSVLGPLK20200000000000000000            | sp Q96E09 F122A_HUMAN |
| 12597 | TFSDTTHGSVPSDPLGR20000000000000                  | sp Q86V48 LUZP1_HUMAN |
| 12598 | YIAKFQGEDTVVIASKPYAFDR3.000000002E+22            | sp P33176 KINH_HUMAN  |
| 12599 | QPPLSSQRPR2200000                                | sp Q8NFI3 ENASE_HUMAN |
| 12600 | DRTPPHLLYSR200000000000                          | sp Q8NDT2 RB15B_HUMAN |
| 12601 | DGDSYDPYDFSDTEEMPQVHTPK2.0000000000001E+21       | sp P25205 MCM3_HUMAN  |
| 12602 | RSRSASLR20202000                                 | sp Q16629 SRSF7_HUMAN |
| 12603 | ESESEDETTPAAPQLIK200200000000000                 | sp O60832 DKC1_HUMAN  |
| 12604 | TAHNSEADLEESFNEHELEPSSPK20000000002000           | sp Q8IWS0 PHF6_HUMAN  |
| 12605 | YTPTSPSYSPSPEYTPSPK300000000002000               | sp P24928 RPB1_HUMAN  |
| 12606 | APQSGSPSPGSLAPR22000000000                       | sp MQZC1 RN225_HUMAN  |



|       |                                                               |    |           |             |
|-------|---------------------------------------------------------------|----|-----------|-------------|
| 12607 | SETAPAAPAAPAPAEKTPVKK200000                                   | sp | P10412    | H14_HUMAN   |
| 12608 | SRTHSTSSSLGSGESPF202000000000000000                           | sp | Q9UGV2    | NDRG3_HUMAN |
| 12609 | SPQNDHSDTDSEENRDNQFLTTVK2. 000000202E+26                      | sp | Q86W56    | PARG_HUMAN  |
| 12610 | GGSGYVQLSAGYESVDSPTGSENSTHQSNDTSSHDPQEEK3. 00000000000202E+31 | sp | Q15007    | FL2D_HUMAN  |
| 12611 | TPTSSPASSPLVAK200000022000000                                 | sp | Q14684    | RRP1B_HUMAN |
| 12612 | RQSSGSATNVASTPDNR200000                                       | sp | Q7Z460    | CLAP1_HUMAN |
| 12613 | VSSPLSPLSPGIKSPTIPR200002000000                               | sp | Q9P2B4    | CT2NL_HUMAN |
| 12614 | KFELLTPPLSPSR200000200                                        | sp | P04198    | MYCN_HUMAN  |
| 12615 | SGSGSVGNSSRYSPSQNSPIHHIPSR2. 0202000022032E+27                | sp | P01106    | MYC_HUMAN   |
| 12616 | VNFSEEGETEEDDQDSSHSSVTTVK2. 0000200000022E+22                 | sp | Q9NYF8    | BCLF1_HUMAN |
| 12617 | KSPSPAGGGSPYSR202000000003000                                 | sp | Q5JTV8    | TOIP1_HUMAN |
| 12618 | RSSPSARPPDVPGQPQAAK2000000000000000000                        | sp | Q14004    | CDK13_HUMAN |
| 12619 | TPASGLQPTSTPAPGSATR2E+20                                      | sp | Q96JP5    | ZFP91_HUMAN |
| 12620 | QQSSSSKGDSPKPR202200000000000                                 | sp | Q96DF8    | DGC14_HUMAN |
| 12621 | YLSFTPPEK200000                                               | sp | Q5VWQ8    | DAB2P_HUMAN |
| 12622 | SDGAPASDSKPGSSEAAPSSKETPAATEAPSSTPK200000000000000000         | sp | Q13177    | PAK2_HUMAN  |
| 12623 | KQPPVSPGTALVGSQKEPSEVTPK2000000000000                         | sp | P80723    | BASP1_HUMAN |
| 12624 | FFTTGSDSESESSLGEELVTKPVGGNYGK2. 020202E+25                    | sp | P17096    | HMGA1_HUMAN |
| 12625 | SPGSGSQSSGWHEVEPGMPSPTTLK2E+22                                | sp | B5ME19    | EIFCL_HUMAN |
| 12626 | SALSPSKSPAK200000020000                                       | sp | Q99613    | EIF3C_HUMAN |
| 12627 | SESAPTLHPYSPLSPK200000000002000                               | sp | Q12857    | NFIA_HUMAN  |
| 12628 | SSTSFANIQENSN200000000000                                     | sp | P49792    | RBP2_HUMAN  |
| 12629 | TLGTPTQPGSTPR20000022000                                      | sp | Q7Z3J3    | RGPD4_HUMAN |
| 12630 | DLTHSDSESSLHMSDR200000000                                     | sp | Q8WUF5    | IASPP_HUMAN |
| 12631 | SPASPSQAPYAQR20020000000000                                   | sp | Q86WC4    | OSTM1_HUMAN |
| 12632 | RLSSSESPQRDPPPPPPPPPLLR2. 02E+19                              | sp | Q8NFH5    | NUP53_HUMAN |
| 12633 | STPLASPSPSGRSPQR2000200000000                                 | sp | Q13586    | STIM1_HUMAN |
| 12634 | EASTTAAAPGEETSPVQVPAR200000000                                | sp | Q8NE35    | CPEB3_HUMAN |
| 12635 | LASVPAGAVAVSAAPGSAAPAAGSAPAAAEK2000000000                     | sp | Q9H2G4    | TSYL2_HUMAN |
| 12636 | TPPPHSHAAPSTGSPVPATEPPAAK200000020000000                      | sp | Q8WYP5    | ELYS_HUMAN  |
| 12637 | RPESAPAESSPSK20000020000                                      | sp | Q5SXM2    | SNPC4_HUMAN |
| 12638 | SSTPLPTISSAENTR22000000000000200                              | sp | P05387    | RLA2_HUMAN  |
| 12639 | IEIPVTPTGQSVSPSPSIPGTPTLK2000200000                           | sp | Q9UKP4    | ATS7_HUMAN  |
| 12640 | VKSSTPPRQSPSR22000020000                                      | sp | Q07889    | SOS1_HUMAN  |
| 12641 | SSISLGWKPAPKDGGSPIK2000000000000020000                        | sp | P42166    | LAP2A_HUMAN |
| 12642 | TASISSPSEGTPVGSYGCTPQSLPK2E+27                                | sp | P42167    | LAP2B_HUMAN |
| 12643 | VLTANSNPSSPSAAK2000000                                        | sp | Q9H4Z3    | PCIF1_HUMAN |
| 12644 | SRDATPPVSPINMEDQER200020000000000                             | sp | Q9UQ35    | SRRM2_HUMAN |
| 12645 | SPVVGDTSPR20002000                                            | sp | Q8WZ42    | TITIN_HUMAN |
| 12646 | LNSSVLVPYGAESSEDSDEESK22002000000                             | sp | Q6PKG0    | LARP1_HUMAN |
| 12647 | VLSGNCNHQEGTSSDDELPSAEMIDFQK2. 00000000002E+26                | sp | Q9NV56    | MRGBP_HUMAN |
| 12648 | IGFPETEEEELEEIASENSDCIFPSAPDVK2000000000000000                | sp | P17275    | JUNB_HUMAN  |
| 12649 | ASINLLSDK2002000                                              | sp | P10636    | TAU_HUMAN   |
| 12650 | KEMDPVTQLYTMTSTLEYK100000030100200000                         | sp | TAU_HUMAN |             |
| 12651 | QEKPAEKPAETPVATSPTATDSTSGDSSR2E+19                            | sp | Q9H9J4    | UBP42_HUMAN |
| 12652 | DLSTSPKPSPIPSPVLGR20002000000                                 | sp | P16383    | GCFC2_HUMAN |
| 12653 | GMGSDFEDESREGDPEER1020000000000000000                         | sp | Q9Y3F4    | STRAP_HUMAN |
|       |                                                               | sp | Q04656    | ATP7A_HUMAN |
|       |                                                               | sp | Q13740    | CD166_HUMAN |
|       |                                                               | sp | P54727    | RD23B_HUMAN |
|       |                                                               | sp | Q8NDI1    | EHBP1_HUMAN |
|       |                                                               | sp | Q5TEC3    | ZN697_HUMAN |

|       |                                                         |    |           |             |
|-------|---------------------------------------------------------|----|-----------|-------------|
| 12654 | CSSLPPMTPKTMPR20000000                                  | sp | Q9NYZ3    | GTSE1_HUMAN |
| 12655 | GSSDGRGSDSEDLPHR200000200000000000                      | sp | Q9UPQ0    | LIMC1_HUMAN |
| 12656 | TDSREDEISPPPPNPVVK2000000020000000000                   | sp | P10644    | KAPO_HUMAN  |
| 12657 | SRSGSSQELDVKPSASPQER2022000000000000000                 | sp | Q9UQ35    | SRRM2_HUMAN |
| 12658 | SGYSSPGSPGTPGSR200200000000                             | sp | P10636    | TAU_HUMAN   |
|       |                                                         | sp | TAU_HUMAN |             |
| 12659 | RLSLPADIR20000000                                       | sp | Q00536    | CDK16_HUMAN |
|       |                                                         | sp | Q00537    | CDK17_HUMAN |
| 12660 | AADGGERPLAASPPGTVK20000000                              | sp | 095785    | WIZ_HUMAN   |
| 12661 | CVPAPGAGASGGTSPSATQPNPAVFIFEHK2000000000000000000       | sp | 060343    | TBCD4_HUMAN |
| 12662 | RVSSRSVSGSPEPAAK2202020200000000                        | sp | Q8IYB3    | SRRM1_HUMAN |
| 12663 | DRDYSDHPSGGSYRDSYESYGNSR300000000                       | sp | Q96E39    | RMXL1_HUMAN |
|       |                                                         | sp | P38159    | RBMX_HUMAN  |
| 12664 | ATSPSSVSGDFDDGHHSVSTPGPSR2. 2E+25                       | sp | Q86U86    | PB1_HUMAN   |
| 12665 | ETSVSKEDTDHEEKASNEVDTK2. 2E+21                          | sp | 075475    | PSIP1_HUMAN |
| 12666 | RGPDRGSPEYR200000                                       | sp | P49716    | CEBPD_HUMAN |
| 12667 | DGSGTPSRHSLSGSSPGMK20200202000000000                    | sp | Q9UQ35    | SRRM2_HUMAN |
| 12668 | LPSKELPDSSSPVANNIR2000000020000000000                   | sp | Q9BWT3    | PAPOG_HUMAN |
| 12669 | TPPITTK20000000                                         | sp | Q5T200    | ZC3HD_HUMAN |
| 12670 | SQSSSQDNPLAPGYLPPHYK2. 022E+21                          | sp | Q6ZRV2    | FA83H_HUMAN |
| 12671 | TQDPSSPGTTPQAR22000000                                  | sp | Q13112    | CAF1B_HUMAN |
| 12672 | SPPVQPHTPVTISLGTAPSLQNNQPVEFNHAINVVK2. 000000000002E+37 | sp | Q96ST3    | SIN3A_HUMAN |
| 12673 | SSGHSSSELSPDAVEK220022200000000000                      | sp | Q9UQ35    | SRRM2_HUMAN |
| 12674 | VHSTSSLDSQK2000000000                                   | sp | Q96JI7    | SPTCS_HUMAN |
| 12675 | STPLASPSPSGRSPQR200000002000000000                      | sp | Q8WYP5    | ELYS_HUMAN  |
| 12676 | TFSDENVL20020000                                        | sp | Q8NB49    | AT11C_HUMAN |
| 12677 | LSPVGVVSSSQGK200000000000000                            | sp | Q00587    | BORG5_HUMAN |
| 12678 | VSPASPAGSPSADFAVHGESLDR2. 000000002E+23                 | sp | Q96C92    | SDCG3_HUMAN |
| 12679 | SSEGGVGVGPGGGDEPPTS2E+20                                | sp | Q9Y4H2    | IRS2_HUMAN  |
| 12680 | HSPVQMN20000000                                         | sp | Q0JRZ9    | FCHO2_HUMAN |
| 12681 | SPPKSPEKLPQSSSESSPSPQPTK2. 0002E+26                     | sp | Q9UQ35    | SRRM2_HUMAN |
| 12682 | NTPSQHSHSIQHSPER2020000000020000                        | sp | Q9NYF8    | BCLF1_HUMAN |
| 12683 | GRSPDELPSAGDGGK20000000000000000                        | sp | 060610    | DIAP1_HUMAN |
| 12684 | TKSSSDLSPRR20020200200000                               | sp | Q9BRD0    | BUD13_HUMAN |
| 12685 | RGSVSSVSPKPPSSFK2020000000000000                        | sp | Q9NZJ0    | DTL_HUMAN   |
| 12686 | HRSNSFS200000                                           | sp | Q09666    | AHNK_HUMAN  |
| 12687 | RVSHSPPPKQR2020000000                                   | sp | Q8IYB3    | SRRM1_HUMAN |
| 12688 | YIASVQGSTPSR2002000                                     | sp | P49792    | RBP2_HUMAN  |
| 12689 | RLSSTSLASGHSVR22002000000                               | sp | Q9BZL6    | KPCD2_HUMAN |
| 12690 | TNSDSALHQSTMTPTQPESFSSGSQDVHQK2000000000000000000       | sp | Q6UUU9    | CRTC1_HUMAN |
| 12691 | GNULLHFPSSQGEEKEK20000000000                            | sp | Q12888    | TP53B_HUMAN |
| 12692 | IEIPVPTGQSVSPSPSIPGTPLK2000000000000                    | sp | Q9H4Z3    | PCIF1_HUMAN |
| 12693 | EPLENSASESSDTELPEKER2000220000000000                    | sp | P78337    | PITX1_HUMAN |
| 12694 | TESVSDKEDKPLAPSGGTEGPEQPPPCPSQTGSPPVGLIK20200000000     | sp | Q8WWM7    | ATX2L_HUMAN |
| 12695 | VAEPGAEATSSSTGEESGSEHPPAVPMHNK2. 20002E+19              | sp | Q14684    | RRP1B_HUMAN |
| 12696 | GGAPEGPNEAEVTSKGPEQVPDAEEKSVSGTDVQECCR2E+27             | sp | P49321    | NASP_HUMAN  |
| 12697 | EPALPLEPDSGGNTSPGVTANGEAR2000000000000000000            | sp | Q92974    | ARHG2_HUMAN |
| 12698 | SLAASSPPPCSQPSQCPEEKQESSPMK2000000000000000000          | sp | Q7Z6J9    | SEN54_HUMAN |
| 12699 | YPLCSADAAVSTTPPGSPPPPPLPEPPVLK2. 0000002E+27            | sp | Q9BTC0    | DIDO1_HUMAN |
| 12700 | RSLSPKPR20200000                                        | sp | Q13523    | PRP4B_HUMAN |
| 12701 | AGSSPCLGSSSAASSPPPPASR2002000000000                     | sp | Q6ZRS2    | SRCAP_HUMAN |
| 12702 | LLGLTPPEGGADRSEEEASSTEKPTK200000000000000               | sp | Q9UGY1    | NOL12_HUMAN |

|       |                                                   |                       |
|-------|---------------------------------------------------|-----------------------|
| 12703 | EVHDELEDLSPPPPPLSPPPTTSPHK2220000                 | sp Q9NQX3 GEPH_HUMAN  |
| 12704 | EELTPGAPQHQLPPVPGSPEPYPGQQAPGPEPSQPLLELTPR3E+21   | sp Q9H6F5 CCD86_HUMAN |
| 12705 | RFTPPSTALSPGK200000020000                         | sp Q01196 RUNX1_HUMAN |
| 12706 | SESGSPSAGGHSKPPHSPLVLK2000000000002000000         | sp P01106 MYC_HUMAN   |
| 12707 | VLHSPPAVR2000000                                  | sp Q9Y4B5 MTCL1_HUMAN |
| 12708 | SMGTGDTPGLEVPSSPLRK200000                         | sp Q86WB0 NIPA_HUMAN  |
| 12709 | RPGSVSSTDQER2200000                               | sp Q9H1B7 I2BPL_HUMAN |
| 12710 | SSSKESLVR20020000                                 | sp Q13439 GOGA4_HUMAN |
| 12711 | SPQPVCSPAGSEGTK2000000                            | sp Q6KC79 NIPBL_HUMAN |
| 12712 | DSTSQHDDDNISTTSGFSSRASDKDITVSK2. 2220022002E+19   | sp P49790 NU153_HUMAN |
| 12713 | KHHESITPPSRSPK2020000                             | sp Q8IY92 SLX4_HUMAN  |
| 12714 | HSHKPHPVETSQPSDK20000000                          | sp Q03188 CENPC_HUMAN |
| 12715 | GQSQTSPDHRSDTSSPEVR2200002020000000               | sp Q9UQ35 SRRM2_HUMAN |
| 12716 | GSPVSSPQNSPGTQR2000000                            | sp Q9P2P5 HECW2_HUMAN |
| 12717 | SVCPCGGSSPGSSSGGR200000                           | sp Q53LP3 SWAHC_HUMAN |
| 12718 | GHPAQRPEPSPPEPEQAPEGSQAGAEGPSSPEASR20000000       | sp Q6ZW31 SYDE1_HUMAN |
| 12719 | QKPESDDSDRENKGEDTEMQNSDFHSDSHMDR2E+25             | sp Q96ST2 IWS1_HUMAN  |
| 12720 | SDGSGESAQPPEDSSPPASSESSSTR20000000000000          | sp Q7Z6Z7 HUWE1_HUMAN |
| 12721 | DMESPTKLDVTLAK10002000000000                      | sp P27816 MAP4_HUMAN  |
| 12722 | SPEETATQVPSLESITLK2000000000000000000             | sp Q9HCK8 CHD8_HUMAN  |
| 12723 | SSSVGSSSYPISPAISR23000000000                      | sp Q15149 PLEC_HUMAN  |
| 12724 | SRSQSRYSADSYSSTR23000000000000                    | sp A7MD48 SRRM4_HUMAN |
| 12725 | DTLSNPQSPQSPYNSPKPKHK2. 000002000203E+21          | sp Q96PU5 NED4L_HUMAN |
| 12726 | SALNLNQPVSVSSVPVK20000                            | sp Q86XJ1 GA2L3_HUMAN |
| 12727 | NATQPPNAEEESGSSSASEEEDTKPKPKR2. 0000000020222E+28 | sp Q68E01 INT3_HUMAN  |
| 12728 | DSAAPSPIPGADNLSADPVVSPPTSIPFK2E+24                | sp Q5T1M5 FKB15_HUMAN |
| 12729 | GHSEIITNR20000000                                 | sp P0C091 FREM3_HUMAN |
| 12730 | SPVSGDTSR2000                                     | sp TAU_HUMAN          |
|       |                                                   | sp P10636 TAU_HUMAN   |
| 12731 | DTDMNKKDK201000000                                | sp Q6S545 POTEH_HUMAN |
|       |                                                   | sp A6NI47 POTEM_HUMAN |
|       |                                                   | sp Q6S5H5 POTEG_HUMAN |
| 12732 | KRESESEDETTPAAPQLIK2000020000000000               | sp O60832 DKC1_HUMAN  |
| 12733 | RFSPRR200000                                      | sp Q15287 RNPS1_HUMAN |
| 12734 | LKTPSTPVACSTPAQLK2002000000000000                 | sp Q6PL18 ATAD2_HUMAN |
| 12735 | VVLGDGVQLPPGDYSTTPGGTLFSTTPGGTR200200000000       | sp Q13541 4EBP1_HUMAN |
| 12736 | TPTSPLK20020000                                   | sp O60264 SMCA5_HUMAN |
| 12737 | DMSLKDSGDLSHRPK200000000                          | sp O95251 KAT7_HUMAN  |
| 12738 | KPGPPLSPEIRSPAGSPELR2000020000000000              | sp Q96JM3 CHAP1_HUMAN |
| 12739 | EAFEQPQTSSTPPR20000                               | sp P52564 MP2K6_HUMAN |
| 12740 | IKPVTENLVLSHTGFCQSSGDEALSK2200000000              | sp P46100 ATRX_HUMAN  |
|       |                                                   | sp Q09160 1A80_HUMAN  |
|       |                                                   | sp P05534 1A24_HUMAN  |
| 12741 | GGSYSQAASSDSAQGSVSLTACK20002002000000             | sp P30447 1A23_HUMAN  |
|       |                                                   | sp P01891 1A68_HUMAN  |
|       |                                                   | sp P01892 1A02_HUMAN  |
|       |                                                   | sp P10316 1A69_HUMAN  |
| 12742 | ARSRTPPSAPSQR20000000200                          | sp Q9UQ35 SRRM2_HUMAN |
| 12743 | SPAEGSERLSLPLR20002020000                         | sp Q66K74 MAP1S_HUMAN |
| 12744 | QGSITSPQANEQSVTPQRR200000000000200000             | sp Q9UQ35 SRRM2_HUMAN |
| 12745 | SCTSPDQISHRASLEDAPVDDLTR2. 0200000020002E+25      | sp Q7Z2W4 ZCCHV_HUMAN |
| 12746 | SPTAPSVFSPTGNR2000000000000000                    | sp Q9H3P2 NELFA_HUMAN |
| 12747 | VAHEPVAPPEDKESESEAKVDGETASDESER2000000000000200   | sp O95674 CDS2_HUMAN  |
| 12748 | FHALSSPQSPFPSTPTR20000000000                      | sp O43166 SI1L1_HUMAN |

|       |                                                                  |    |        |             |
|-------|------------------------------------------------------------------|----|--------|-------------|
| 12749 | HSSETFSSTTTVTPVSPSFAHNP2. 02E+22                                 | sp | Q9Y4H2 | IRS2_HUMAN  |
| 12750 | YRPASVPPSPSLSR20002020000                                        | sp | P13807 | GYS1_HUMAN  |
| 12751 | LSGEHSESSTPRPR20000002000000                                     | sp | Q7Z3K3 | POGZ_HUMAN  |
| 12752 | SPAEGSERLSLSPLR2020000                                           | sp | Q66K74 | MAP1S_HUMAN |
| 12753 | LDSQPQETSPELPR20000000                                           | sp | Q14545 | TRAD1_HUMAN |
| 12754 | TESVSDKEDKPPLAPSGGTEGPEQPPPCPSQTGSPPVGLIK2. 0000000000<br>02E+24 | sp | Q8WWM7 | ATX2L_HUMAN |
| 12755 | LDSSEMDHSENYDTMSSPLPGK1000000032000000000                        | sp | Q9NTI5 | PDS5B_HUMAN |
| 12756 | MMLTLISK200000                                                   | sp | Q07617 | SPAG1_HUMAN |
| 12757 | SETSSNPSSPEICPNK22000000000000                                   | sp | Q684P5 | RPGP2_HUMAN |
| 12758 | SKSPLPPEEEAK2000000000000                                        | sp | Q1KMD3 | HNRL2_HUMAN |
| 12759 | TQPSSGVDSAVGTLPATSPQSTSVQAK200000000000                          | sp | Q13428 | TCOF_HUMAN  |
| 12760 | SSTPLPTISSAENTR22000000                                          | sp | P42167 | LAP2B_HUMAN |
| 12761 | SFSADGFEMLQNPVK20000000000000                                    | sp | P42166 | LAP2A_HUMAN |
| 12762 | VGPGNHGTEGSGGERHSDTSDRR200000000000000                           | sp | Q9HCM1 | K1551_HUMAN |
| 12763 | SSSTEPPPPVR20200000000                                           | sp | Q99442 | SEC62_HUMAN |
| 12764 | TPTSSPASSPLVAK220000000000                                       | sp | Q8N684 | CPSF7_HUMAN |
| 12765 | VQIPVSRPDPPEVSDNEEDSYDEEIHDP2. 00000000000002E+24                | sp | Q14684 | RRP1B_HUMAN |
| 12766 | AAPEASSPPASPLQHLLPGK20000000000                                  | sp | Q07157 | ZO1_HUMAN   |
| 12767 | MISTPSPK2002000                                                  | sp | Q96TA1 | NIBL1_HUMAN |
| 12768 | TEMKSPFNPSQDSR2020002000                                         | sp | Q53F19 | CQ085_HUMAN |
| 12769 | DLDRPESQSPK202000                                                | sp | P08651 | NF1C_HUMAN  |
| 12770 | TLSVAAAFNEDEDSEPEEMPPEAK200000000000                             | sp | Q8WUA4 | TF3C2_HUMAN |
| 12771 | NCPSPVLIDCPHPNCNK200000000000000                                 | sp | Q8WW12 | PCNP_HUMAN  |
| 12772 | DSFSHSPGAVSSLK200000000000                                       | sp | Q15014 | ZN609_HUMAN |
| 12773 | DSDYVYPSLESDENPIFK2000000000000                                  | sp | Q9H6R7 | CB044_HUMAN |
| 12774 | WATDQEDCSQDLAGTDLGPQK200000000000000                             | sp | Q07515 | PHF2_HUMAN  |
| 12775 | HIAFTPESQRR20020000                                              | sp | Q07512 | COBL_HUMAN  |
| 12776 | KAPSASDSKADSDGAKPEPVAMAR2. 00020002E+21                          | sp | Q5H9R7 | PP6R3_HUMAN |
| 12777 | NQSPTEAEKPASSSLPSSPPQLTR20000000000000                           | sp | Q7Z4V5 | HDGR2_HUMAN |
| 12778 | IQSSLSVNSDISKK202000002000                                       | sp | Q99567 | NUP88_HUMAN |
| 12779 | SDSSGGYNLSDIIQSPSSTGLLK200002000000000                           | sp | Q9P1T7 | MDF1C_HUMAN |
| 12780 | GNEPGSDRSPSPSK2002000000                                         | sp | Q9P2D0 | IBTK_HUMAN  |
| 12781 | QGGSPSSPSPGQSQVTPQDQEK20000000000000000                          | sp | Q5VT52 | RPRD2_HUMAN |
| 12782 | SGSYGRSPSPYGR200000000200000                                     | sp | Q9H0L4 | CSTFT_HUMAN |
| 12783 | DYSTLTSVSSHDSR2000000200200                                      | sp | Q9NYV4 | CDK12_HUMAN |
| 12784 | SEHSHSTLPR2220000                                                | sp | P16144 | ITB4_HUMAN  |
| 12785 | GRSECDSSPEPK20002200000                                          | sp | P16144 | ITB4_HUMAN  |
| 12786 | SPYGGGRPGR20000000000                                            | sp | Q9UQ35 | SRRM2_HUMAN |
| 12787 | TSPPCSPANLSR2000000000000                                        | sp | P46781 | RS9_HUMAN   |
| 12788 | HSSISPVR20020000                                                 | sp | P49585 | PCY1A_HUMAN |
| 12789 | EKSEGGSEYGTGPR202002000000000                                    | sp | Q9NYV4 | CDK12_HUMAN |
| 12790 | SEPLPTFNQFSPISSPEPEDPIKDNGFGIKPK2. 000020002E+27                 | sp | Q12873 | CHD3_HUMAN  |
| 12791 | APSASDSKADSDGAKPEPVAMAR2. 02000002E+21                           | sp | Q92610 | ZN592_HUMAN |
| 12792 | QSISFSGLPGR200000000000                                          | sp | Q7Z4V5 | HDGR2_HUMAN |
| 12793 | EYVNSTSEESHDEDEIRPVQQDLHR2E+21                                   | sp | P26651 | TTP_HUMAN   |
| 12794 | STSTPTSPGPR2000000                                               | sp | Q8NBU5 | ATAD1_HUMAN |
| 12795 | LKLSPSSSR20000200                                                | sp | Q8WWM7 | ATX2L_HUMAN |
| 12796 | LDSQEPGRQTPDR20000                                               | sp | P20700 | LMNB1_HUMAN |
| 12797 | SKLSPSPSLRK202000000                                             | sp | Q03252 | LMNB2_HUMAN |
| 12798 | GRSPPERVPVGP2000000002000                                        | sp | Q8TB03 | CX038_HUMAN |
| 12799 | KAPPPPISPTQLSDVSSPR2000020020000                                 | sp | Q5T200 | ZC3HD_HUMAN |
|       |                                                                  | sp | Q9Y4B5 | MTCL1_HUMAN |
|       |                                                                  | sp | Q9P0K7 | RAI14_HUMAN |

|       |                                                     |                        |
|-------|-----------------------------------------------------|------------------------|
| 12800 | RWVGSSSPISKEK2200000000                             | sp Q96B77 TM186_HUMAN  |
| 12801 | GNLHFPSSQGEEKEK2000000000                           | sp Q12888 TP53B_HUMAN  |
| 12802 | LSLTSDEEGDPLALGPESGEPQPPQLK2E+25                    | sp Q5T1M5 FKB15_HUMAN  |
| 12803 | SSPGAVAGLSNAPGTPR220000000000000000                 | sp Q9BWG4 SSBP4_HUMAN  |
| 12804 | AALDGGVASAASPESKPSGTK200000000000                   | sp Q9Y4K1 AIM1_HUMAN   |
| 12805 | VETVSQPSESPKDTIDK2000000000000000                   | sp Q99590 SCAFB_HUMAN  |
| 12806 | AGSSGNSCITYQPSVSGEHK200000000000000000              | sp Q99755 PI51A_HUMAN  |
| 12807 | TPPHSHPAAPSTGSPVPATEPPAAK2000000020000000           | sp Q9UKP4 ATS7_HUMAN   |
| 12808 | TKCEILSDESSDEDEKK2220000000                         | sp P35659 DEK_HUMAN    |
| 12809 | SPLPGPSEEK200000000000                              | sp Q13112 CAF1B_HUMAN  |
| 12810 | KSRSPVDLR202000000                                  | sp Q13523 PRP4B_HUMAN  |
| 12811 | SYDVPPPPMEPDHPFYSNISK2E+21                          | sp Q8N0Y7 PGAM4_HUMAN  |
| 12812 | QGQSQAASSSSVTSPIK2000000000                         | sp P18669 PGAM1_HUMAN  |
| 12813 | NVSPEFVPCGEGGFLHK200000000000000000                 | sp O60583 CCNT2_HUMAN  |
| 12814 | SSPINPAQSGSPNHVDSAYFPGSSTSSSSDNDEGSGGATNHISGNK2E+36 | sp O94986 CE152_HUMAN  |
| 12815 | SKSQSSGSSATHPIVPGAR2E+20                            | sp Q9N9ZB2 F120A_HUMAN |
| 12816 | SDGPASVVEGPKDPSPCK20000200000000000000              | sp Q9Y4H2 IRS2_HUMAN   |
| 12817 | NAVASVQNGPGGGPSSSSIGSASKSDESSTEETDK200220000000     | sp Q15911 ZFH3_HUMAN   |
| 12818 | VGSLTPPSSPK20002000                                 | sp Q8NI27 THOC2_HUMAN  |
| 12819 | CVSPIPVSPTR20000200000                              | sp Q2M2I8 AAK1_HUMAN   |
| 12820 | KPVLSARNMFMFGLSPVRNPR2000200000020000000            | sp Q86TC9 MYPN_HUMAN   |
| 12821 | APSSPVAKPGPVK200000000000                           | sp A6NL46 YF016_HUMAN  |
| 12822 | THSVPATPTSTPVNPEAESK2.0002E+21                      | sp Q9GZR2 REX04_HUMAN  |
| 12823 | LHSYSSPSTK230000000                                 | sp Q96FF9 CDCA5_HUMAN  |
| 12824 | WAHDKFSGEEGEIEDDESSTENREEK2.000000000002E+20        | sp Q96T37 RBM15_HUMAN  |
| 12825 | APSASDSKADSDGAKPEPVAMAR2.0000020002E+23             | sp Q9Y2W1 TR150_HUMAN  |
| 12826 | VGPGNHGTEGSGGERHSDTSDRR202020000                    | sp Q7Z4V5 HDGR2_HUMAN  |
| 12827 | QEDSVTELTVEDSGESLEDLMAK2E+20                        | sp Q99442 SEC62_HUMAN  |
| 12828 | VRPSSDLNSTGQSPHHK2000000000000000                   | sp Q9GZZ9 UBA5_HUMAN   |
| 12829 | YQEDSDPERSDYEEQLQK200000000000000000                | sp P27448 MARK3_HUMAN  |
| 12830 | ISDSESEDPPRHQASDSENEELPKPR2.000000000002E+25        | sp Q6P6C2 ALKB5_HUMAN  |
| 12831 | AQPSSSEDELNVFFK2220000000000000                     | sp Q96ST2 IWS1_HUMAN   |
| 12832 | VGDSTPVSEKPVSAVDANASESP20200                        | sp Q5T5U3 RHG21_HUMAN  |
| 12833 | ASSHSSQTQGGGVTKK2020000000000000                    | sp Q9H8Y8 GORS2_HUMAN  |
| 12834 | ADSGTPPPLSLSPAPETK2020000000                        | sp P02545 LMNA_HUMAN   |
| 12835 | VAEPGAEATSTGEEGSEHPPAVPMHNK2.000002E+20             | sp O15027 SC16A_HUMAN  |
| 12836 | NVIPDTPPSTPLVPSR200000000000                        | sp Q14684 RRP1B_HUMAN  |
| 12837 | SGTTPKPVINSTPGR2000000020000                        | sp Q9UKA4 AKA11_HUMAN  |
| 12838 | YRPENTPEPVSTSVSHYGAEPSTVSPCPSSSAK2000200000         | sp Q99459 CDC5L_HUMAN  |
| 12839 | DMSPLSETEMALGK2000020000000                         | sp P07947 YES_HUMAN    |
| 12840 | HSCSGSPPR2000020000                                 | sp P27816 MAP4_HUMAN   |
| 12841 | VLLSPSIPSVGDDQTLSPGSK200000000000000000             | sp Q9UQ35 SRRM2_HUMAN  |
| 12842 | IEVLDSASK200000                                     | sp Q13625 ASPP2_HUMAN  |
| 12843 | KPIETGSPK200000                                     | sp Q8N5I9 CLO45_HUMAN  |
| 12844 | SKSPSPLKNK20202000000                               | sp Q05519 SRS11_HUMAN  |
| 12845 | VEAVEEPEAAPILGPGEPGPAPSRTPSR20202000                | sp O94913 PCF11_HUMAN  |
| 12846 | GYSSPEPDIQDSSGSEAQSVKPSTR3.000000000002E+24         | sp Q8IX07 FOG1_HUMAN   |
| 12847 | DSELSDTDSGCCLGQSESDK2000000000000000                | sp Q9BZF1 OSBL8_HUMAN  |
| 12848 | SMSVDETDKSPCEAGR2000000000000000                    | sp Q96T88 UHRF1_HUMAN  |
| 12849 | DNPAQDFSTLYGSSPLER200000                            | sp Q53SF7 COBL1_HUMAN  |
| 12850 | SAGGRPGSGPQLGTGR2000000000                          | sp Q15648 MED1_HUMAN   |
| 12851 | NINMDNDLEVLTSPPTR20000                              | sp O14908 GIPC1_HUMAN  |
| 12852 | QATPGVPAQQSPSM20000                                 | sp Q9Y5T5 UBP16_HUMAN  |
|       |                                                     | sp O60341 KDM1A_HUMAN  |

|       |                                               |                        |
|-------|-----------------------------------------------|------------------------|
| 12853 | SPSQESIGAR200000000                           | sp Q8WXE0 CSKI2_HUMAN  |
| 12854 | SKSPASVDR2020020000                           | sp Q13243 SRSF5_HUMAN  |
| 12855 | SSSPIPLTPSK20000000000                        | sp Q8N5Y2 MS3L1_HUMAN  |
| 12856 | SPASDSETEDALKPQISDSESEEP2. 020200000002E+23   | sp Q96ST2 IWS1_HUMAN   |
| 12857 | MPGMSPANPSLHSPVPDASHSPR200200000002000        | sp Q06244 MED14_HUMAN  |
| 12858 | SKSEDSALFTHHSLGSEVVK200000000000              | sp Q99708 COM1_HUMAN   |
| 12859 | SLPPQLLEGPSSTPSSHSDTR2000000000000000         | sp Q6ZRS2 SRCAP_HUMAN  |
| 12860 | VETVSPSESPKDTIDK20000000000000                | sp Q99590 SCAFB_HUMAN  |
| 12861 | SRSPSHTRPR20000020000                         | sp Q8IYB3 SRRM1_HUMAN  |
| 12862 | IEEVLSPEGSPSKSPSKK20002000200000              | sp Q9UEY8 ADDG_HUMAN   |
| 12863 | RLSGSEDEEDSGK2022000000000                    | sp Q9BW71 HIRP3_HUMAN  |
| 12864 | SPVGKSPSTGTYGSSQK200000000000                 | sp Q9Y2W1 TR150_HUMAN  |
|       |                                               | sp Q29960 1C16_HUMAN   |
|       |                                               | sp Q9TNN7 1C05_HUMAN   |
|       |                                               | sp Q07000 1C15_HUMAN   |
|       |                                               | sp Q29963 1C06_HUMAN   |
|       |                                               | sp P30505 1C08_HUMAN   |
| 12865 | GGSCSQAASSNSAQGSDESLIACK20002000000000        | sp P30508 1C12_HUMAN   |
|       |                                               | sp Q95604 1C17_HUMAN   |
|       |                                               | sp P04222 1C03_HUMAN   |
|       |                                               | sp Q29865 1C18_HUMAN   |
|       |                                               | sp P30504 1C04_HUMAN   |
|       |                                               | sp P30510 1C14_HUMAN   |
| 12866 | SRSIDKDR202000000                             | sp Q8TF01 PNISR_HUMAN  |
| 12867 | SPASDSETEDALKPQISDSESEEP2. 00202E+26          | sp Q96ST2 IWS1_HUMAN   |
| 12868 | QRSDDESPTSSGSSDADQRDPAAPEPEEQEER2E+31         | sp Q969T4 UB2E3_HUMAN  |
| 12869 | TSSPPSPQHSPALR2200000000200000                | sp Q13029 PRDM2_HUMAN  |
| 12870 | ALSPGRESFK200002000                           | sp Q13207 TBX2_HUMAN   |
| 12871 | SHTSEGAHLDITPNSGAAGNSAGPK2. 00000000002E+25   | sp Q92597 NDRG1_HUMAN  |
| 12872 | TVHPNSPGIPYR20000000                          | sp Q8WUI4 HDAC7_HUMAN  |
| 12873 | VQNHLPASGPTQPPVVSSTNEGSPSPPEPTGK20200000000   | sp Q043294 TGF11_HUMAN |
| 12874 | SRSHDRLPYQR202000000000                       | sp P49761 CLK3_HUMAN   |
| 12875 | YETPSDAIEVISPASSAPPQEK2200000000              | sp Q075376 NCOR1_HUMAN |
| 12876 | EGMNPYSDEYADSDEDQHDAYLER30000000000000000000  | sp Q08945 SSRP1_HUMAN  |
| 12877 | KRESESEDETTPAAPQLIK20000000000000             | sp Q060832 DKC1_HUMAN  |
| 12878 | IFDEVMGCFSDSPQSPTFPEAGHTSLYDEDK2. 000002E+23  | sp Q13085 ACACA_HUMAN  |
| 12879 | RPMSSPEMK2000000                              | sp P51610 HCFC1_HUMAN  |
| 12880 | KAPPPPISPTQLSDVSSPR2000020022000              | sp Q9P0K7 RAI14_HUMAN  |
| 12881 | DISGSPSKK2000                                 | sp Q96GX9 MTNB_HUMAN   |
| 12882 | TPASTPVSGTPQASPMIER20000000000010000          | sp Q9UHR4 BI2L1_HUMAN  |
| 12883 | LIPLDEECMSDETYPVETLEPGGSGGSPDGAGGSK2000000000 | sp Q96QC0 PP1RA_HUMAN  |
| 12884 | KADTEGKSPSHSSNRPFPTSTGGSK2. 02E+19            | sp Q15648 MED1_HUMAN   |
| 12885 | ASSPTKTSPTTPEASATNSPCTSKPATPAPSEK2. 2022E+27  | sp Q12873 CHD3_HUMAN   |
| 12886 | YPFKSPSIGFMNK30002000001000                   | sp P62256 UBE2H_HUMAN  |
| 12887 | ILSDVTHSAVFGVPASK2000000000000                | sp Q2M2I8 AAK1_HUMAN   |
| 12888 | ALSSGGITSPPLSPALPK20000000000000000000        | sp Q6Y7W6 PERQ2_HUMAN  |
| 12889 | MKTPVQYSQQNSPQK2000300000000000               | sp P46013 KI67_HUMAN   |
| 12890 | TYGGDTGSPEISFTK2000000000                     | sp Q094915 FRYL_HUMAN  |
| 12891 | LDSPTMSR20000                                 | sp P19634 SL9A1_HUMAN  |
| 12892 | AHFNAMFQSSPTR1000020000                       | sp Q8WUA4 TF3C2_HUMAN  |
| 12893 | TASPLPLRPDAPVEK2000000000000000               | sp Q9HCK8 CHD8_HUMAN   |
| 12894 | TKSPKPAESPQSATK20000020000000                 | sp Q5VUA4 ZN318_HUMAN  |
| 12895 | VGPGNHGTEGSGGERHSDTSDR20200000                | sp Q99442 SEC62_HUMAN  |
| 12896 | SPQGQLDTSESKPDSFFLEPLMPAVLKPAK2E+30           | sp Q5T5Y3 CAMP1_HUMAN  |

|       |                                                 |                       |
|-------|-------------------------------------------------|-----------------------|
| 12897 | IKEEEPVEVDSSPPDSPASSPCSPPLK220002000200200000   | sp P17544 ATF7_HUMAN  |
| 12898 | DQRSPSPIR200000                                 | sp Q5T200 ZC3HD_HUMAN |
| 12899 | RPTETNPVTSNSDEECNETVK2000                       | sp P46100 ATRX_HUMAN  |
| 12900 | TSPTTPEASATNSPCTSKPATPAPSEK2.000202E+23         | sp Q12873 CHD3_HUMAN  |
| 12901 | LKSSTSFANIQENSN220000000000                     | sp Q86WC4 OSTM1_HUMAN |
| 12902 | TVSSDGCSTPSR2000000000                          | sp Q12888 TP53B_HUMAN |
| 12903 | SLTWPPSGSPSHAGTTPPENGLSEHPCETEQINAK2.02E+29     | sp P23497 SP100_HUMAN |
| 12904 | RPFLSGDEDPK20000000                             | sp Q8WYR1 PI3R5_HUMAN |
| 12905 | STLESEKPGSPEAAETSPPSNIIDHCEK2000000000000       | sp Q96T23 RSF1_HUMAN  |
| 12906 | QQDLHLESPQRQPEYSPESPR2000000300000000           | sp Q9H6F5 CCD86_HUMAN |
| 12907 | LNNTPDSDWLQLKPLAGTDDSVVSEDR20020000             | sp Q9ULF5 S39AA_HUMAN |
| 12908 | LSPEPGR2000000                                  | sp Q9NWK9 BCD1_HUMAN  |
| 12909 | SDLSSSSGSLSLSHGSSSLEHR2000000000000             | sp O15013 ARHGA_HUMAN |
| 12910 | DTLSNPQSPQSPYNSPKPKQHK2000003000000000          | sp Q96PU5 NED4L_HUMAN |
| 12911 | SPGSTPTTPTSSQAPQK200200000002000000             | sp P35658 NU214_HUMAN |
| 12912 | LALSPEDKPIRLSPSK20000000000200                  | sp O15417 TNC18_HUMAN |
| 12913 | SYSPDGKESPSDKK30000002000000                    | sp P43243 MATR3_HUMAN |
| 12914 | GHSPTLRPK200000000                              | sp Q53LP3 SWAHC_HUMAN |
| 12915 | HGSFVNKPTR200000000                             | sp P29353 SHC1_HUMAN  |
| 12916 | RSSLSPSSAYER2002000000000                       | sp Q9BYW2 SETD2_HUMAN |
| 12917 | TDGSISGDRQPVTVADYISR200000000000000000          | sp P51116 FXR2_HUMAN  |
| 12918 | CLSDPGHPPEPGEPEFFPK200000000000000000           | sp P19634 SL9A1_HUMAN |
|       |                                                 | sp P01891 1A68_HUMAN  |
|       |                                                 | sp P01892 1A02_HUMAN  |
| 12919 | GGSYSQAASSDSAQGSVDVSLTACK2.3E+22                | sp P05534 1A24_HUMAN  |
|       |                                                 | sp Q09160 1A80_HUMAN  |
|       |                                                 | sp P10316 1A69_HUMAN  |
|       |                                                 | sp P30447 1A23_HUMAN  |
| 12920 | SPQEGPTWSR20000000000                           | sp Q9Y4F5 C170B_HUMAN |
| 12921 | SKEFVSSDESSGENK22200000                         | sp Q08945 SSRP1_HUMAN |
| 12922 | EWNGVSESDSPVKRPGR2000200000000                  | sp P18858 DNL11_HUMAN |
| 12923 | LTPSPDIIVLSDNEASSPR2000                         | sp Q8WXI9 P66B_HUMAN  |
| 12924 | EVTPILAQTQSSGPQTSTTPQVLSPTITSPNALPR2E+34        | sp P30260 CDC27_HUMAN |
| 12925 | RSSLPPNSPKPVR200002000000                       | sp Q7Z401 MYCPP_HUMAN |
| 12926 | AGPDLPSLPSHALEDEGWAAAAPSPGSAR2E+20              | sp Q9H3Q1 BORG4_HUMAN |
| 12927 | GFYPQYGALETR30000000200                         | sp Q63ZY3 KANK2_HUMAN |
| 12928 | SYSPDGKESPSDKK2000000                           | sp P43243 MATR3_HUMAN |
| 12929 | VENSPQVDGSPGLEGLLGGIGEK2E+21                    | sp Q8WVB6 CTF18_HUMAN |
| 12930 | AGSSGNSCITYQPSVSGEHK200000000000                | sp Q99755 PI51A_HUMAN |
| 12931 | GPGEPSPTPLHPPTPILSTDR20000000200000000          | sp Q03164 KMT2A_HUMAN |
| 12932 | QRSHSGTSPDNTAPPPPPRPQPSHSR2.0202E+25            | sp Q96D71 REPS1_HUMAN |
| 12933 | TEMKSPFNPSPPQDSR10020000020002000               | sp P08651 NFIC_HUMAN  |
| 12934 | GWGSPGRPK2000000                                | sp A7E2V4 ZSWM8_HUMAN |
| 12935 | SAPSSPTLDCEK2002000000000                       | sp Q9GZM8 NDEL1_HUMAN |
| 12936 | ASAGPAPGPVVTAEGLHPSLPSPTGNSTPLGSSK2000000000000 | sp Q4KMP7 TB10B_HUMAN |
| 12937 | GPTTGEALDLSDVHSPPKSPEGK20002000000000           | sp O95684 FR10P_HUMAN |
| 12938 | TGSNAAQYK20000000                               | sp Q8N556 AFAP1_HUMAN |
| 12939 | TSCKDDEAVVQAPR20000000000000                    | sp P35658 NU214_HUMAN |
| 12940 | VAEPGAEATSSTGEESGSEHPPAVPMHNK2.2020002E+21      | sp Q14684 RRP1B_HUMAN |
| 12941 | RVSSSGKPTSLK20000000000                         | sp Q9ULD2 MTUS1_HUMAN |
| 12942 | KPLTSSSAAPQRPISTQR2000000000000000              | sp Q15691 MARE1_HUMAN |
| 12943 | NMVDLVNTHHLHSSSDEDDRLK2000000000000000          | sp Q9UPN7 PP6R1_HUMAN |
| 12944 | SDSDSSTLPR20000                                 | sp Q9ULE0 WWC3_HUMAN  |
| 12945 | KSTYWMKMR23000100                               | sp Q96ME7 ZN512_HUMAN |

|       |                                                    |                          |
|-------|----------------------------------------------------|--------------------------|
| 12946 | SYESSEDCSEAAGSPAR20000                             | sp Q6P6C2 ALKB5_HUMAN    |
| 12947 | RQSSGSATNVASTPDNR2000020000000000                  | sp Q7Z460 CLAP1_HUMAN    |
| 12948 | EMEHNTVCAAGTSPVGEIGEEK200000000000000000           | sp P18583 SON_HUMAN      |
| 12949 | SPSEESAPTTSPESVSGSVPSSGSSGR2E+22                   | sp P54725 RD23A_HUMAN    |
| 12950 | KTSIKSHMSGSPGPGSNTAPSTPVIIGSDKPGMEEK2.02000002E+29 | sp A0FGR8 ESYT2_HUMAN    |
| 12951 | LSYLPATVEPASPTPAHSLPR20000000000                   | sp Q9NRA0 SPHK2_HUMAN    |
| 12952 | NHKPSRSFSR2020000                                  | sp P84103 SRSF3_HUMAN    |
| 12953 | RYPSSISSSPQK2000020000                             | sp Q14157 UBP2L_HUMAN    |
| 12954 | SSTPPRQSPSR22000020000                             | sp Q9UQ35 SRRM2_HUMAN    |
| 12955 | SGPSPLSSPNGK2200000                                | sp O75179 ANR17_HUMAN    |
| 12956 | YPSSISSSPQK200020000                               | sp Q14157 UBP2L_HUMAN    |
| 12957 | TVTPASSAKTSPAK200220000                            | sp Q16555 DPYL2_HUMAN    |
| 12958 | VDEDSAEDTQSNKGKEVVEVGQK2.0002E+19                  | sp Q9H2G2 SLK_HUMAN      |
| 12959 | VGDPPQPLPEEPMEVQGAERASPEPQR2000000                 | sp P46379 BAG6_HUMAN     |
| 12960 | QRGSETGSETHESDLAPSDK2000000000000000               | sp P48634 PRC2A_HUMAN    |
| 12961 | EANPTPLTPGASSLSQLGAYLSDSDSN200200000               | sp Q9BW85 CCD94_HUMAN    |
| 12962 | DGTAPPPQSPGSPGTGQDEEWSDEESPRK2002000000000000000   | sp Q9UKS6 PACN3_HUMAN    |
| 12963 | DVYLSR2000                                         | sp Q96E39 RMXL1_HUMAN    |
| 12964 | MPQPSSGRESRPH2000000000                            | sp P38159 RBMX_HUMAN     |
| 12965 | SPVSTRPLPSASQK200000000002000                      | sp P56181 NDUV3_HUMAN    |
| 12966 | ALSAQRLSPR2000                                     | sp Q8ND56 LS14A_HUMAN    |
| 12967 | NHSPSPVPTPTGAAPSLASPK2.000002E+19                  | sp O75912 DGKI_HUMAN     |
| 12968 | RNSNSPPSPSSMNQR20000000200000                      | sp Q5SYE7 NHSL1_HUMAN    |
| 12969 | SSLSSHSHQSQIYR20220000000000                       | sp Q7Z5L9 I2BP2_HUMAN    |
| 12970 | GSKPSPLSVK2002000                                  | sp O15027 SC16A_HUMAN    |
| 12971 | SSLGSHQLPR22000000000                              | sp Q96S94 CCNL2_HUMAN    |
| 12972 | SQSLPTLLSPVR20000000020000                         | sp O95817 BAG3_HUMAN     |
| 12973 | SEPLTFNFQFPISSPEPEDPIKDNFGFIKPK2.000000022E+27     | sp P28290 SSFA2_HUMAN    |
| 12974 | RLPSSPASPSPK2200200000                             | sp Q92610 ZN592_HUMAN    |
| 12975 | EGSEFSFSDGEVAEK200000000                           | sp sp Q9H4G0 E41L1_HUMAN |
| 12976 | KPLTSSSAAPQRPISTQR2000000000000000                 | sp Q9BVS4 RIOK2_HUMAN    |
| 12977 | REESPMDVDQPSAQTQSIASDGTQGEK1.00000000000002E+26    | sp Q15691 MARE1_HUMAN    |
| 12978 | DSQSASGEERPPEADGK2000000000000                     | sp Q7Z6Z7 HUWE1_HUMAN    |
| 12979 | HLGGSGSVVPGSPCLDR2000000                           | sp P48634 PRC2A_HUMAN    |
| 12980 | SPVVS GDTSR200020000000                            | sp Q9HBL0 TENS1_HUMAN    |
| 12981 | LQPSSPENSLDPFPPR200000000                          | sp P10636 TAU_HUMAN      |
| 12982 | AQPFIDSDTDAEEER20000000                            | sp TAU_HUMAN             |
| 12983 | LDSSPVSSPR220000000                                | sp Q8WWM7 ATX2L_HUMAN    |
| 12984 | RDSSESQLASTESDKPTTGR200000000                      | sp Q14676 MDC1_HUMAN     |
| 12985 | RNSVERPAEPVAGAATPSLVEQK2.000000000002E+22          | sp O60293 ZC3H1_HUMAN    |
| 12986 | RRSPSLSSK20002000                                  | sp Q96B23 CRO25_HUMAN    |
| 12987 | SSTATHPGPAVQLNK200000000000                        | sp Q9BTC0 DIDO1_HUMAN    |
| 12988 | YMSGQTSR2000                                       | sp Q8IYB3 SRRM1_HUMAN    |
| 12989 | ATLGPTPTTPPQPPDPSQPPPGPMQH200000000000000000       | sp Q14684 RRP1B_HUMAN    |
| 12990 | EQSSDLTPSGDVSPVKPLSR200000000                      | sp Q9UJ41 RABX5_HUMAN    |
| 12991 | YQESPGIQMK20000000                                 | sp O60927 PP1RB_HUMAN    |
| 12992 | RPPSPDIVLSDNEQPSSPR20000000000020000               | sp Q8WYQ5 DGCR8_HUMAN    |
| 12993 | DLHQPSLSPASPHSQGFER2002000000000                   | sp Q9UHI6 DDX20_HUMAN    |
| 12994 | SPSPGNHTSNSSNASNATVVPQNSSAR2.02E+19                | sp Q86YP4 P66A_HUMAN     |
| 12995 | TLLSESSSQSSKSPSLSSK20000000                        | sp Q9BZF1 OSBL8_HUMAN    |
| 12996 | LEPVSPSPPHTDPELELVPPR2000200000000000              | sp Q9BTA9 WAC_HUMAN      |
| 12997 | VLSSAASLPGSELSSRPEGSQGGELSR2E+26                   | sp Q9UPU5 UBP24_HUMAN    |
|       |                                                    | sp Q9Y618 NCOR2_HUMAN    |
|       |                                                    | sp O15027 SC16A_HUMAN    |



|       |                                                        |    |        |             |
|-------|--------------------------------------------------------|----|--------|-------------|
| 12998 | SSQQPSTPQQAPPGQPQQGTFVAHK2E+19                         | sp | Q86VM9 | ZCH18_HUMAN |
| 12999 | RHSSVSDSQCEPPSVGTEYSQGASQPQHQK2E+31                    | sp | P39880 | CUX1_HUMAN  |
| 13000 | AEPPKPEVVDSTESIPVSEDESDAMVDDPNDEDFVFRPR2. 00000002E+27 | sp | Q14202 | ZMYM3_HUMAN |
| 13001 | EPEPAAGPQAEESATVSAPAPMSPTR20000                        | sp | Q9BWG6 | SCNM1_HUMAN |
| 13002 | IGNEESDLEEACILPHSPINVDK2000000000020000000             | sp | O95714 | HERC2_HUMAN |
|       |                                                        | sp | Q9BVR0 | HRC23_HUMAN |
| 13003 | SGSPSDNSGAEEMEVSLAKPK2. 0000002E+21                    | sp | P31749 | AKT1_HUMAN  |
| 13004 | LQSEPEsir20000000                                      | sp | P09496 | CLCA_HUMAN  |
| 13005 | TASETRSEGSEYEEIPKR2030000000                           | sp | P48634 | PRC2A_HUMAN |
| 13006 | DMSLKDSGDLSHRPK200020200000000                         | sp | O95251 | KAT7_HUMAN  |
| 13007 | KVSSSPQSGCPSPTIPAGK2000000000002000000                 | sp | Q76L83 | ASXL2_HUMAN |
| 13008 | VQRPHSSPPR20000                                        | sp | Q9NUJ3 | T11L1_HUMAN |
| 13009 | SDGACDSPSSDKENSSQIAQDHQK22000000000                    | sp | Q9UIG0 | BAZ1B_HUMAN |
| 13010 | GTSPSSSRPQR20000000000                                 | sp | Q8N1F7 | NUP93_HUMAN |
| 13011 | ARGDSEALDEES200000000                                  | sp | Q7Z4V5 | HDGR2_HUMAN |
| 13012 | GPSPPASPTR200000200                                    | sp | Q6P5Z2 | PKN3_HUMAN  |
| 13013 | GPGPGQSGPGGPGPR2000000000                              | sp | Q8IYL2 | TRM44_HUMAN |
| 13014 | IKEEPVSEEGEEDEEQAEEEPMDTSPSGLHSHK2E+27                 | sp | Q9NVU0 | RPC5_HUMAN  |
| 13015 | TPLSSLSATSNNSTVACIDR20000000                           | sp | P00533 | EGFR_HUMAN  |
| 13016 | GNVFSSPTAAGTPNK200000020000                            | sp | Q05682 | CALD1_HUMAN |
| 13017 | SEVQQPVHPKPLSPDRASSLSESSPPK22020200000                 | sp | Q9UHB6 | LIMA1_HUMAN |
| 13018 | STPESGSDKESVGSSTSNEGGR20000000000000                   | sp | Q6GQQ9 | OTU7B_HUMAN |
| 13019 | IPGSPPEMGR200000000                                    | sp | P50395 | GDIB_HUMAN  |
| 13020 | YRLSSAGPR2200000                                       | sp | Q6PL18 | ATAD2_HUMAN |
| 13021 | AQTPPGPSLSGSKSPCQEK2000000202000000000                 | sp | Q9UQ35 | SRRM2_HUMAN |
| 13022 | LHNElQSGSLR2000                                        | sp | Q5JTH9 | RRP12_HUMAN |
| 13023 | RGSQDEDESCSLHSQTLSEDER2000000000000                    | sp | Q9UPZ3 | HPS5_HUMAN  |
| 13024 | SSSKTGRDTPENGETAIGAENSEK2. 202E+23                     | sp | Q8N3X1 | FNBP4_HUMAN |
| 13025 | HLDVDLDRQSLSSIDKNPSER22000002000                       | sp | Q9Y6D5 | BIG2_HUMAN  |
| 13026 | GNLELRPGGAHPGTCSRPGS20000000                           | sp | Q96SN8 | CK5P2_HUMAN |
| 13027 | QEAkpQQAAGMLSPK102000                                  | sp | Q13428 | TCOF_HUMAN  |
| 13028 | TASETRSEGSEYEEIPKR20000002000000000                    | sp | P48634 | PRC2A_HUMAN |
| 13029 | AVTIANSKPKSEK2000000                                   | sp | Q8NEF9 | SRFB1_HUMAN |
| 13030 | SPSPPLPHIPPEPRTPPFPAK2. 00000000000002E+21             | sp | Q8IZ21 | PHAR4_HUMAN |
| 13031 | SCTPSPDQISHR20000000000                                | sp | Q7Z2W4 | ZCCHV_HUMAN |
| 13032 | HSHSPASSPKPLK20002000000                               | sp | Q9HDC5 | JPH1_HUMAN  |
| 13033 | GSISSTSEVHSPNVGLR2002000000000000                      | sp | Q8WWQ0 | PHIP_HUMAN  |
| 13034 | THCAATPSSSEDTEtVNSSEGR20000                            | sp | O75143 | ATG13_HUMAN |
| 13035 | TPPPSSTFPK200000000000                                 | sp | Q86SQ0 | PHLB2_HUMAN |
| 13036 | TRSWDSSSPVDRPEPEAASPTTR20000000000200000               | sp | Q86WB0 | NIPA_HUMAN  |
| 13037 | EKGPTTGEGALDLSDVHSPPKSPEGK20002000000000               | sp | O95684 | FR10P_HUMAN |
| 13038 | SRTPPSAPSQR2020020000000                               | sp | Q9UQ35 | SRRM2_HUMAN |
| 13039 | LFAPQQILQCSPAN20000                                    | sp | P04183 | KITH_HUMAN  |
| 13040 | KPGSLFAALMATATSSLR1000022000                           | sp | Q96J66 | ABCCB_HUMAN |
| 13041 | NTSNIPVILEPETEESENEFYIK200200000000                    | sp | Q6PON0 | M18BP_HUMAN |
| 13042 | TSGGDHAPDSPSGENSPAPQGR20000020000000                   | sp | Q96NY9 | MUS81_HUMAN |
| 13043 | TMFAQVESDDEEAKNEPEWK1. 000002E+19                      | sp | Q9NW82 | WDR70_HUMAN |
| 13044 | SFSSSPSPSPTSPHRPSIR2220202000000000000                 | sp | Q86VM9 | ZCH18_HUMAN |
| 13045 | NMVDLVNTHHLHSSDDEDRK20000022000000000                  | sp | Q9UPN7 | PP6R1_HUMAN |

|       |                                               |                       |
|-------|-----------------------------------------------|-----------------------|
|       |                                               | sp Q29960 1C16_HUMAN  |
|       |                                               | sp Q9TNN7 1C05_HUMAN  |
|       |                                               | sp Q07000 1C15_HUMAN  |
|       |                                               | sp Q29963 1C06_HUMAN  |
|       |                                               | sp P30505 1C08_HUMAN  |
| 13046 | GGSCSQAASSNSAQGSDESLIACK20000000000000        | sp P30508 1C12_HUMAN  |
|       |                                               | sp Q95604 1C17_HUMAN  |
|       |                                               | sp P04222 1C03_HUMAN  |
|       |                                               | sp Q29865 1C18_HUMAN  |
|       |                                               | sp P30504 1C04_HUMAN  |
|       |                                               | sp P30510 1C14_HUMAN  |
| 13047 | AISSSDSSDEDK20200220000000                    | sp Q6PD62 CTR9_HUMAN  |
| 13048 | VLSGNCNHQEGTSSDDELPSAEMIDFK22000000001000000  | sp P16383 GCFC2_HUMAN |
| 13049 | SPSPASTSTVPMNTDAPTAPK2.00000000001E+21        | sp Q659A1 ICE2_HUMAN  |
| 13050 | AESSSSISSASLSAANTPTVGVSR2.2022E+21            | sp Q0JRZ9 FCHO2_HUMAN |
| 13051 | GTTPPRSPEASPK200020000000                     | sp Q9HDC5 JPH1_HUMAN  |
| 13052 | YWEETVPTTAGASPGPPR2000000000000000            | sp O15213 WDR46_HUMAN |
| 13053 | ATSPLCTSTASMVSSSPSTPSNIPQKPSQPAK2.0002E+31    | sp P30622 CLIP1_HUMAN |
| 13054 | EYIPGQPPLSQSSDSSPTR20020000000                | sp P07814 SYEP_HUMAN  |
| 13055 | ITSYFLNEGSQARPR23000000000000                 | sp O75792 RNH2A_HUMAN |
| 13056 | LCSSEVGLLK20000000                            | sp Q9NWC5 TM45A_HUMAN |
| 13057 | YTPTSPSYSPPSPEYTPSPK2000000000030000000       | sp P24928 RPB1_HUMAN  |
| 13058 | GSGVAQSPQQPPPPQQQQQQPPQPTPPK20000             | sp Q6VY07 PACS1_HUMAN |
| 13059 | SPVVSQDTSR200020002000                        | sp TAU_HUMAN          |
|       |                                               | sp P10636 TAU_HUMAN   |
| 13060 | RGTGSESSRASGLVGR2002002002000000              | sp Q9UH99 SUN2_HUMAN  |
| 13061 | VVFSSDESSEEDLSAEMTEDETPKK2.2002200002001E+22  | sp Q15021 CND1_HUMAN  |
| 13062 | EGQSPADEKGNDSGEGESDDPEK2000000000000          | sp O75351 VPS4B_HUMAN |
| 13063 | ISDSESEDPPRHQASDSENEELPKPR2.00000000202E+21   | sp Q96ST2 IWS1_HUMAN  |
| 13064 | RSSPSARPPDVPGQQPQAAK20000000000000000         | sp Q96JP5 ZFP91_HUMAN |
| 13065 | DKEPFTFSSPASGR2002000                         | sp Q6P1X5 TAF2_HUMAN  |
| 13066 | SRTVSASSTGDLPK202020200000000                 | sp P78362 SRPK2_HUMAN |
| 13067 | ISDSESEDPPRHQASDSENEELPKPR2.0200000000202E+23 | sp Q96ST2 IWS1_HUMAN  |
| 13068 | SRSRTPPAIR202000000                           | sp Q9UQ35 SRRM2_HUMAN |
| 13069 | RFSSGGEEDDFDR220000000000                     | sp O94929 ABLM3_HUMAN |
| 13070 | LVKPSSSSSGSRSSR2200                           | sp Q9H6B4 CLMP_HUMAN  |
| 13071 | RESESEDETPPAAPQLIK200000020000000000          | sp O60832 DKC1_HUMAN  |
| 13072 | SSPELPPSGGTTSGSR20000020000000000             | sp Q96D31 CRCM1_HUMAN |
| 13073 | NAASFPLRSPQVPCSPAGSETPK2.00000000002E+21      | sp Q6KC79 NIPBL_HUMAN |
| 13074 | TPTTPGFAAQLNPNGYPR22000000000000000           | sp Q8WU20 FRS2_HUMAN  |
| 13075 | SSPVPVSDTQK20000000000                        | sp Q76FK4 NOL8_HUMAN  |
| 13076 | RRSPSPYYSR200030000                           | sp P62995 TRA2B_HUMAN |
|       |                                               | sp Q13595 TRA2A_HUMAN |
| 13077 | SSWHQSSFHSTR2000000                           | sp Q99959 PKP2_HUMAN  |
| 13078 | HSTPSNSSNPSGPPSPNSPHR20000000000000000        | sp Q9Y5S2 MRCKB_HUMAN |
| 13079 | TCPSLSPTSPLNNK202002000000                    | sp O75925 PIAS1_HUMAN |
| 13080 | TGSNISGASSDISLDEQYK200020000000000            | sp P22059 OSBP1_HUMAN |
| 13081 | RLEISPDSSPER200020000                         | sp Q99959 PKP2_HUMAN  |
| 13082 | EVHDELEDLSPPPPPLSPPTTSPHK20000000002020000    | sp Q9NQX3 GEPH_HUMAN  |
| 13083 | QISYNYSDLQSNVTEETPEGEEHHPVADTENK3E+30         | sp Q8NC51 PAIRB_HUMAN |
| 13084 | ISDSESEDPPR202000000                          | sp Q96ST2 IWS1_HUMAN  |
| 13085 | FTDTRKDEQER20200000000                        | sp P13639 EF2_HUMAN   |
| 13086 | ASSESSYLSILPK200000000000                     | sp Q86SQ0 PHLB2_HUMAN |
| 13087 | VASPSQGVGSSSPKR200000                         | sp Q99569 PKP4_HUMAN  |

|       |                                                    |                       |
|-------|----------------------------------------------------|-----------------------|
| 13088 | VAHSDKPGSTSTASFR200000                             | sp Q9P0L0 VAPA_HUMAN  |
| 13089 | RSPSPLGTSVR20200000000                             | sp Q86SQ0 PHLB2_HUMAN |
| 13090 | KPEKPLFSSASPQDSSPR220000000000                     | sp 000712 NFIB_HUMAN  |
| 13091 | RDSL TGSSDLYK200000                                | sp Q14671 PUM1_HUMAN  |
| 13092 | IEEVLSPEGSPSKSPSK2000200000000                     | sp Q9UEY8 ADDG_HUMAN  |
| 13093 | ADAPDAGAQSDELPSYHQNDVSLDR2000000000020000          | sp Q92538 GBF1_HUMAN  |
| 13094 | SSSKGSVEEIMSQPK2200020000100000                    | sp Q8IWB9 TEX2_HUMAN  |
| 13095 | RLPGESGSCEDGQSAPAPPR202000000000000000             | sp Q6UXQ8 Y0002_HUMAN |
| 13096 | LFVTPPEGSSR2000000000                              | sp Q14244 MAP7_HUMAN  |
| 13097 | SPSHSSNRPTPTSTGGSK200000000000000000               | sp Q15648 MED1_HUMAN  |
| 13098 | KPSVSEEVQATPNK200000000000                         | sp Q9UKJ3 GPTC8_HUMAN |
| 13099 | HKSDSPESDAEREK200200000000                         | sp 075400 PR40A_HUMAN |
| 13100 | YESQLSTNEEK200000                                  | sp Q13433 S39A6_HUMAN |
| 13101 | SPGMEPPFHR2000000000000000                         | sp Q99973 TEP1_HUMAN  |
| 13102 | KLEGNPQGSNGVK200020000000                          | sp P61006 RAB8A_HUMAN |
| 13103 | SSSPCRTPEPDNDAHLR200020000000000000                | sp Q9Y2K6 UBP20_HUMAN |
| 13104 | GKDSLDDGVDLK202000000000                           | sp P07948 LYN_HUMAN   |
| 13105 | DGSDYDPYDFSDTEEEMPQVHTPK2020001000000000           | sp P25205 MCM3_HUMAN  |
| 13106 | TSSDPNLNHCQEV200000000000000000                    | sp Q9NYA4 MTMR4_HUMAN |
| 13107 | TPASTPVSGTPQASPMIER2000000002010000                | sp Q9UHR4 BI2L1_HUMAN |
| 13108 | TDSEKPFRRSQSPKR2020000                             | sp Q9Y2W1 TR150_HUMAN |
| 13109 | ESAAPASPAPSPAPSPTAPPQK2.00002E+22                  | sp Q3KQU3 MA7D1_HUMAN |
| 13110 | YTPTSPSYSPSSPEYTPSPK2020000000000000               | sp P24928 RPB1_HUMAN  |
| 13111 | NMVDLVNTHLHSSDDEDDLK1.000000000022E+22             | sp Q9UPN7 PP6R1_HUMAN |
| 13112 | SVPVNNLPERSPDSDPR2000000000                        | sp P49454 CENPF_HUMAN |
| 13113 | LPEPSVLSEVTKPPPCLNSSPPSR200000                     | sp Q9BZL4 PP12C_HUMAN |
| 13114 | EVQTPQYLNPFDPEAFVTIKDSPPQSTK200                    | sp Q8NDI1 EHBP1_HUMAN |
| 13115 | GHPAQRPEPSPPEPEPQAPEGSQAGAEGSSPEASRSPAR2E+19       | sp Q6ZW31 SYDE1_HUMAN |
| 13116 | AKSPTSPSPPRNSDQEGGK2.02020000002E+19               | sp Q8IYB3 SRRM1_HUMAN |
| 13117 | FSTYTSKDKENKLEASGGR20020000                        | sp Q8WU90 ZC3HF_HUMAN |
| 13118 | GPSQEEEDNHSDEEDRASEPKSQDQDSEVNLSR2.00000020002E+24 | sp Q86VM9 ZCH18_HUMAN |
| 13119 | LQDSSDPDTGSEEEGSSRLSPPHSPR2.2E+23                  | sp Q92974 ARHG2_HUMAN |
| 13120 | YTPTSPSYSPSSPEYTPSPK20000000000000000000           | sp P24928 RPB1_HUMAN  |
| 13121 | LQDSSDPDTGSEEEGSSRLSPPHSPR2.2000202E+23            | sp Q92974 ARHG2_HUMAN |
| 13122 | GSDALSETSSVSHIEDLEK20002020000000000000            | sp Q6P996 PDXD1_HUMAN |
| 13123 | IEHAPSPSSGGTLK20000000                             | sp Q14004 CDK13_HUMAN |
| 13124 | ELVEPLTPSGEAPNQALLR20000000000000                  | sp P00533 EGFR_HUMAN  |
| 13125 | EAAVSASDILQESAIHSPGTVEK2E+19                       | sp Q96C57 CL043_HUMAN |
| 13126 | SWEDSPER200020000                                  | sp Q9UDY2 ZO2_HUMAN   |
| 13127 | QLGDSSGEGPEFVEEEVALRSDSEGSDYTPGK2E+29              | sp Q14839 CHD4_HUMAN  |
| 13128 | VWSPLVTEEGK20000000000                             | sp 000151 PDL1_HUMAN  |
| 13129 | TSSAVWNSPPLQGAR2200002000000000                    | sp Q9NQS7 INCE_HUMAN  |
| 13130 | SGGGFGPDGSGTTVPAR20000000000000000000              | sp Q9H4L4 SENP3_HUMAN |
| 13131 | ESYTEEIVSEASHVSGISR2.00000000002E+19               | sp Q5QJE6 TDIF2_HUMAN |
| 13132 | FSSPTEELDYR20000000000                             | sp 095359 TACC2_HUMAN |
| 13133 | LSSAGPRSPYCK200000200000                           | sp Q6PL18 ATAD2_HUMAN |
| 13134 | AQGPAASAEKPKVEAPAANSQDQTVTVKE2000000               | sp P80723 BASP1_HUMAN |
| 13135 | HLDGEEDGSSDQSQASGTTGGR200000000000                 | sp Q9UNF1 MAGD2_HUMAN |
| 13136 | LDSSEMDSSENYDTMSSPLPGK2.0010000000021E+21          | sp Q9NTI5 PDS5B_HUMAN |
| 13137 | SPSPPDGSPAATPEIR202000020000000000                 | sp 000499 BIN1_HUMAN  |
| 13138 | QQPPEPEWIGDGESTSPSDK20000000                       | sp Q8NE71 ABCF1_HUMAN |
| 13139 | SAWSPELFS20                                        | sp Q8IXT1 DDIAS_HUMAN |
| 13140 | KRSPSPSPTPEAK2020200000000                         | sp Q8TAQ2 SMRC2_HUMAN |
| 13141 | GKSSEPVVIMK2000000000                              | sp P46013 KI67_HUMAN  |

|       |                                                                |                       |
|-------|----------------------------------------------------------------|-----------------------|
| 13142 | YPSSISSSPQKDLTQAK200020000000000                               | sp Q14157 UBP2L_HUMAN |
| 13143 | SRTSPVTR200000000                                              | sp Q9UQ35 SRRM2_HUMAN |
| 13144 | SRSLVDYENANK20000000000                                        | sp Q9UNH7 SNX6_HUMAN  |
| 13145 | EGEETEGSEEDDKENDKTEEMPNDVLENK2.000000002E+23                   | sp P49321 NASP_HUMAN  |
| 13146 | STSAPQMSPGSSDNQSSSPQPAQQK1.000020002E+19                       | sp Q14157 UBP2L_HUMAN |
| 13147 | EYIPGQPPLSQSSDSSPTR20000020000                                 | sp P07814 SYEP_HUMAN  |
| 13148 | SRSRSPTPSSAGLGSNSAPPIDSR2.020022E+22                           | sp Q8IWX8 CHERP_HUMAN |
| 13149 | SLENETLNKEEDCHSPTSKPPKPDQPLK2.000000002E+23                    | sp P23588 IF4B_HUMAN  |
| 13150 | TPSSEEISPTKFPGLYR200000200000000                               | sp Q15311 RBP1_HUMAN  |
| 13151 | MPDEPEEPVVAVSSPAVPPPTK20000000000                              | sp O60885 BRD4_HUMAN  |
| 13152 | VAFDPEQKPLHGVLKPTTSSPASSPLVAK220020000000                      | sp Q14684 RRP1B_HUMAN |
| 13153 | SRSGSSQELDVKPSASPQR2.02E+20                                    | sp Q9UQ35 SRRM2_HUMAN |
| 13154 | GEQVSQNGLPAEQGSPPR2000                                         | sp Q01082 SPTB2_HUMAN |
| 13155 | SIPLECLSSPK2000                                                | sp Q92667 AKAP1_HUMAN |
| 13156 | VVSSEGGPSVDLSFQPSQPLSK20000000000                              | sp P49815 TSC2_HUMAN  |
| 13157 | SRVSVSPGR2002020000                                            | sp Q8IYB3 SRRM1_HUMAN |
| 13158 | RVPGSSGHLHK22000000                                            | sp Q9UEW8 STK39_HUMAN |
| 13159 | SLENETLNKEEDCHSPTSKPPKPDQPLK2.00002E+28                        | sp P23588 IF4B_HUMAN  |
| 13160 | LSPYPSSPMR30020000                                             | sp O94967 WDR47_HUMAN |
| 13161 | RHSSVSDSQCEPPSVGTEYSQGASPPQHQHLK2.02000000000003E+28           | sp P39880 CUX1_HUMAN  |
| 13162 | KPPGTPPPSALPLGAPPPDALPPGPTPEDSPSLETGSR2E+30                    | sp Q9BQQ3 GORS1_HUMAN |
| 13163 | ISDSESEDPPRHQASDSENEELPKPR2.0202E+25                           | sp Q96ST2 IWS1_HUMAN  |
| 13164 | AQTTPGPSLSGSKSPCPQEK2000000000000000000                        | sp Q9UQ35 SRRM2_HUMAN |
| 13165 | DDGDEEGLLTHSEEELEHSQDADADDGALQ2E+19                            | sp Q9UKM9 RALY_HUMAN  |
| 13166 | RESESEDETPPAAPQLIKK2000200200000000000                         | sp O60832 DKC1_HUMAN  |
| 13167 | QRSHSGTSPDNTAPPPPPRPPQPSHSR2.20002E+21                         | sp Q96D71 REPS1_HUMAN |
| 13168 | HIVNHDDVFEESEELSSDEEMK22000100                                 | sp Q96RT1 LAP2_HUMAN  |
| 13169 | LNETELTDLEGQESPPKNYLCIEEEK2E+24                                | sp Q9ULF5 S39AA_HUMAN |
| 13170 | NATQPPNAEEESGSSSASEEEDTKPKPTK2.000000002022E+27                | sp Q68E01 INT3_HUMAN  |
| 13171 | DILKPSPGKSPGTRPEDEAEGKPPQR2.0002E+21                           | sp P31641 SC6A6_HUMAN |
| 13172 | TRSWDSSSPVDRPEPEAASPTR2E+21                                    | sp Q86WB0 NIPA_HUMAN  |
| 13173 | DEPQTVPDVPSFGESPLSPIDMDTQER2000000020000000000                 | sp P17535 JUND_HUMAN  |
| 13174 | RQPTVHFSDVSSDDDED200220000000                                  | sp P15822 ZEP1_HUMAN  |
| 13175 | RSFISPV202000000                                               | sp P18583 SON_HUMAN   |
| 13176 | SISSDGRPLER2000000000                                          | sp O43166 SIIL1_HUMAN |
| 13177 | HASPDKWNDKPK20000000000                                        | sp Q96JM3 CHAP1_HUMAN |
| 13178 | ATSVKGYTGANQSR2000300000000                                    | sp Q5VTH9 WDR78_HUMAN |
| 13179 | SNPEGAEDR2000000000                                            | sp Q9NWX8 BABA1_HUMAN |
| 13180 | ISETLAGIYDDNSLSQDFPGDESPPDAQPTQPTPAPGTPPQVDSTR2.0000002002E+25 | sp Q9H7N4 SFR19_HUMAN |
| 13181 | ESDKEDGRESYDTPSQR20000000000                                   | sp Q9Y6M7 S4A7_HUMAN  |
| 13182 | GVPAGNSDTEGGQGR200000000                                       | sp Q9UKV3 ACINU_HUMAN |
| 13183 | RSSLSSHSHQSIYR20020000000000                                   | sp O15027 SC16A_HUMAN |
| 13184 | NKSNEDQSMGNWQIK2000001000000                                   | sp P02545 LMNA_HUMAN  |
| 13185 | LEDAFIVISDSGEEPKEENGLQK20200000000000000                       | sp Q96RL1 UIMC1_HUMAN |
| 13186 | TSIDSIDSGVELTTPK20020000000000                                 | sp O15403 MOT7_HUMAN  |
| 13187 | SPPADPPR200000000                                              | sp O60566 BUB1B_HUMAN |
| 13188 | LSPLPGPGAGDPR20000000000000                                    | sp Q15742 NAB2_HUMAN  |
| 13189 | GLSLSPQSPERR200002000000                                       | sp Q7Z2Z1 TICRR_HUMAN |
| 13190 | TVIIHDRPDITHPR200000000020000                                  | sp Q9NWH9 SLTM_HUMAN  |
| 13191 | ATLSNPKPK20000000                                              | sp Q96JM3 CHAP1_HUMAN |
| 13192 | VQMTSPSSTGSPMFK2200000001000                                   | sp P49790 NU153_HUMAN |
| 13193 | TANSPGSGARPDPVR2000000000000                                   | sp Q13206 DDX10_HUMAN |

|       |                                                      |    |           |              |
|-------|------------------------------------------------------|----|-----------|--------------|
| 13194 | TASISSSPSEGTPTVGSYGCTPQSLPK2E+27                     | sp | Q6PKG0    | LARP1_HUMAN  |
| 13195 | SGYSSPGSPGTPGSR200000000000                          | sp | P10636    | TAU_HUMAN    |
| 13196 | SMVSPVPSPTGTISVPNSCPASPR1.000000000202E+23           | sp | TAU_HUMAN |              |
| 13196 | SMVSPVPSPTGTISVPNSCPASPR1.000000000202E+23           | sp | P85037    | FO XK1_HUMAN |
| 13197 | QHSNPGHAGFPVSVHNTTINPTSPTTATMANANR200020000000000000 | sp | Q9UPN9    | TRI33_HUMAN  |
| 13198 | HRSLSPVPR20200000                                    | sp | A2AJT9    | CX023_HUMAN  |
| 13199 | SPESQNLIDGTK20000000000000                           | sp | Q9HCE3    | ZN532_HUMAN  |
| 13200 | QRGSETDSEIHEASDKDSLK2.020202E+21                     | sp | Q9Y520    | PRC2C_HUMAN  |
| 13201 | LNLAPAAATTSNEPSGNNPPTHLSLDPTNAENTASQSPR200000        | sp | Q9UER7    | DAXX_HUMAN   |
| 13202 | QSHSGSISPYPK2000200000                               | sp | Q9UQ35    | SRRM2_HUMAN  |
| 13203 | GPEENYSRPEAPNEFYDGDHDNDKESDVEI300000000000000000     | sp | 015379    | HDAC3_HUMAN  |
| 13204 | MVSQSQPGSR2000000                                    | sp | 075122    | CLAP2_HUMAN  |
| 13205 | VLSTSSTLTR200000000                                  | sp | P16144    | ITB4_HUMAN   |
| 13206 | NFSPNAPAHFSFVPAR2000000000000000                     | sp | Q6P0Q8    | MAST2_HUMAN  |
| 13207 | LLQTTNNSPMNSKPQIK200000000000                        | sp | 000178    | GTPB1_HUMAN  |
| 13208 | KDSSSEVFSDAAK200000                                  | sp | Q5T5U3    | RHG21_HUMAN  |
| 13209 | SQGITHHTR200                                         | sp | 014512    | SOC S7_HUMAN |
| 13210 | TPTPSTPGDTQPNT PAPVPPAEDGIK2.02E+26                  | sp | Q14839    | CHD4_HUMAN   |
| 13211 | LQDSSDPDTGSEEEGSSRLSPPHSPR2.000202E+22               | sp | Q92974    | ARHG2_HUMAN  |
| 13212 | LSTIQNSPTK200000000                                  | sp | Q5VYV7    | SLX4I_HUMAN  |
| 13213 | IFDEVMGCFSDSPPQSPTFPEAGHTSLYDEDKVP R1.000202E+30     | sp | Q13085    | ACACA_HUMAN  |
| 13214 | GHTASESDEQQWPEEK200000000000                         | sp | Q9NTI5    | PDS5B_HUMAN  |
| 13215 | HGSYEDAVHSGALND20000002000000                        | sp | P17987    | TCPA_HUMAN   |
| 13216 | TFSDGLATR20000000                                    | sp | Q86UU1    | PHLB1_HUMAN  |
| 13217 | HSSVSDSQCEPPSVGTEYSQGASQPQHQ LK2E+30                 | sp | P39880    | CUX1_HUMAN   |
| 13218 | SHISDQSPLSSK2000000000                               | sp | P42166    | LAP2A_HUMAN  |
| 13219 | TRDDGDEEGLLTHSEEELEHSQD TDADDGALQ2E+21               | sp | Q9UKM9    | RALY_HUMAN   |
| 13220 | GTPPLTPSDSPQTR200000                                 | sp | Q6NZY4    | ZCHC8_HUMAN  |
| 13221 | QVPVMQGTGMQGASIQGGSQPGGFSPGQNVTPQDHEK1.00001E+34     | sp | P33240    | CSTF2_HUMAN  |
| 13222 | SRSHSPMSNR20002000000                                | sp | Q13595    | TRA2A_HUMAN  |
| 13223 | SLRSPLPSR20200000000                                 | sp | Q9NYV4    | CDK12_HUMAN  |
| 13224 | LLGDSDEEEQKEAASSGDDSGRDR2.020000000022E+21           | sp | Q9BW71    | HIRP3_HUMAN  |
| 13225 | SVSASSGPCSPAAPHPPPPR2.022E+19                        | sp | Q86UY5    | FA83A_HUMAN  |
| 13226 | SHMSGSPGPGSNTAPSTPVI GSDKPGMEEK1.202E+30             | sp | A0FGR8    | ESYT2_HUMAN  |
| 13227 | QGSITSPQANEQSVTPQR202000000000000000                 | sp | Q9UQ35    | SRRM2_HUMAN  |
| 13228 | SKSPASVDR2020000000                                  | sp | Q13243    | SRSF5_HUMAN  |
| 13229 | RSSDTSGNEASEIESVK202200000000000000                  | sp | Q71F23    | CENPU_HUMAN  |
| 13230 | VAAAAGSGSPPGSPGHDR2000000000000000                   | sp | Q9BTU6    | P4K2A_HUMAN  |
| 13231 | STSGPRPGCQPSSPCVPK20000000002000000                  | sp | 014545    | TRAD1_HUMAN  |
| 13232 | GYSSPEPDIQDSSGSEAQSVKPSTR2.2000000022E+23            | sp | Q9BZF1    | OSBL8_HUMAN  |
| 13233 | ESSPIPSPTSDR220000000000                             | sp | Q01082    | SPTB2_HUMAN  |
| 13234 | SSPHSTYYMGQSSSGSIHSNLEQEK3E+19                       | sp | Q9ULH0    | KDIS_HUMAN   |
| 13235 | QGSITSPQANEQSVTPQRR200000                            | sp | Q9UQ35    | SRRM2_HUMAN  |
| 13236 | NEENTEPGAESSENADDPNKDTS ENADGQSDENKDDY TIPDEYR2E+40  | sp | P43243    | MATR3_HUMAN  |
| 13237 | AGMSSNQSISSPVLDVPR102000000000000000                 | sp | Q9UQ35    | SRRM2_HUMAN  |
| 13238 | VHGEPTSDLS DID200020000                              | sp | 095696    | BRD1_HUMAN   |
| 13239 | RPTETNPVTSNSDEECNETVK200022020000000000              | sp | P46100    | ATRX_HUMAN   |
| 13240 | NTPSQHSHSIQHSPER20000200020000                       | sp | Q9NYF8    | BCLF1_HUMAN  |
| 13241 | SRSFTLDESLK200000000                                 | sp | Q86WR7    | PRSR2_HUMAN  |
| 13242 | KPSPAASPA TK2000000000                               | sp | Q8N3F8    | MILK1_HUMAN  |
| 13243 | TVSASSTGDLPK20000000000                              | sp | P78362    | SRPK2_HUMAN  |
| 13244 | GPTSSPCEEEGDEGEEDRTSDLRDEASSVTR2.00000000000002E+27  | sp | Q86VM9    | ZCH18_HUMAN  |
| 13245 | QESCSPHHPQVLAQQGSGSSPK2E+20                          | sp | Q8N1G0    | ZN687_HUMAN  |

|       |                                               |                       |
|-------|-----------------------------------------------|-----------------------|
| 13246 | RQSPSPSTRPIR20002000000                       | sp Q8IYB3 SRRM1_HUMAN |
| 13247 | SPSGLRPR200000000                             | sp P49815 TSC2_HUMAN  |
| 13248 | HEAPSSPISGQPCGDDQNASPSK20000                  | sp 075376 NCOR1_HUMAN |
| 13249 | SSSPFLSKR220000000                            | sp Q9NYV4 CDK12_HUMAN |
| 13250 | HSHSPASSPKPLKK200020000000                    | sp Q9HDC5 JPH1_HUMAN  |
| 13251 | RHSSNTDNIPPER200200000000                     | sp Q96EX2 RNFT2_HUMAN |
| 13252 | FSSVSSPQPR2000000                             | sp Q9P206 K1522_HUMAN |
| 13253 | GSGDISSDSIDHSPAK20000                         | sp Q9H5I1 SUV92_HUMAN |
| 13254 | IPMTPTSSFVSPPPPTASPHSNR20000200000000         | sp Q7Z5L9 I2BP2_HUMAN |
| 13255 | NAVASVQNGPGGGPSSSIGASKSDESSTEETDK200200000000 | sp Q8NI27 THOC2_HUMAN |
| 13256 | SGSSPDSEITELK200220020000000                  | sp P17812 PYRG1_HUMAN |
| 13257 | KSDGACDPSDDKENSQIAQDHQK2000000000000000000    | sp Q9UIG0 BAZ1B_HUMAN |
| 13258 | ASIGQSPGLPSTTFK2000000000000000               | sp Q5VT52 RPRD2_HUMAN |
| 13259 | STPLASPSPPGR2000002020000                     | sp Q8WYP5 ELYS_HUMAN  |
| 13260 | SPQPVPSPRPQSQPPHSSPSPR2.00000200002E+22       | sp Q09472 EP300_HUMAN |
| 13261 | LDPFADGGKTPDPK200000                          | sp 075533 SF3B1_HUMAN |
| 13262 | TVLPTVPESPEEVK20000000                        | sp 075152 ZC11A_HUMAN |
| 13263 | KSPA KSPNPSTPR2000000002000                   | sp 076021 RL1D1_HUMAN |
|       |                                               | sp P49792 RBP2_HUMAN  |
|       |                                               | sp Q7Z3J3 RGPD4_HUMAN |
| 13264 | EDALDDSVSSSVHASPLASSPVRK2.02222000000002E+19  | sp A6NKT7 RGPD3_HUMAN |
|       |                                               | sp O14715 RGPD8_HUMAN |
|       |                                               | sp Q99666 RGPD5_HUMAN |
| 13265 | LLEDGEDFNLGDALDSSNSMQTIQK20000000             | sp P05783 K1C18_HUMAN |
| 13266 | SLTNSHLEKK202000000                           | sp Q9H2H9 S38A1_HUMAN |
| 13267 | ALRPPTSPGVFGALQNFK2000000000000               | sp 075151 PHF2_HUMAN  |
| 13268 | ERPISLGFPLPAGDGLLTPDAQK2.00000000000002E+20   | sp 060271 JIP4_HUMAN  |
| 13269 | LHSYSSPSTK2000000                             | sp Q96T37 RBM15_HUMAN |
| 13270 | KNSSTDQGSDEEGLQK20000000020000                | sp Q12789 TF3C1_HUMAN |
| 13271 | SLPSSPLR200200000                             | sp O14830 PPE2_HUMAN  |
| 13272 | NMTVEQLLTGSPTSPTVEPEKPTR2E+22                 | sp Q9C0C9 UBE20_HUMAN |
| 13273 | STPLASPSPPGRSPQR20000020000                   | sp Q8WYP5 ELYS_HUMAN  |
| 13274 | LFSLSNPSLSTTNLSGPSR2000000000000000           | sp Q6UUV7 CRT3_HUMAN  |
| 13275 | TSSLDITGPYLTGQWPR300000000                    | sp Q86VQ1 GLC11_HUMAN |
| 13276 | SRASPSR200000                                 | sp Q9UQ35 SRRM2_HUMAN |
| 13277 | RYSPPPK300200000                              | sp Q8IYB3 SRRM1_HUMAN |
| 13278 | SLSSSIGSNSTYLTSK2200000000000000              | sp Q86SQ4 GP126_HUMAN |
| 13279 | SHSGTSPDNTAPPPPPRPQPSHSR2.20002E+21           | sp Q96D71 REPS1_HUMAN |
| 13280 | SRGSSPGLR20002200000                          | sp Q9UQ35 SRRM2_HUMAN |
| 13281 | GEIKDSSPSSPSPK22000002000                     | sp Q6WKZ4 RFIP1_HUMAN |
| 13282 | TASETRSEGSEYEEIPK20200000000000               | sp P48634 PRC2A_HUMAN |
| 13283 | RSTSPIIGSPPVR220000000000                     | sp Q86TB9 PATL1_HUMAN |
| 13284 | GTGGSESRASGLVGR2002022000000000               | sp Q9UH99 SUN2_HUMAN  |
| 13285 | ESAAPASPAPSPAPTAPPQK2.0000200000002E+22       | sp Q3KQU3 MA7D1_HUMAN |
| 13286 | LCSPLEPGDPSK200000000000                      | sp Q5VUA4 ZN318_HUMAN |
|       |                                               | sp Q9UQ88 CD11A_HUMAN |
| 13287 | RGTSPRPPEGLGYSQLGDDDLK2.000000000002E+21      | sp P21127 CD11B_HUMAN |
|       |                                               | sp O95685 PPR3D_HUMAN |
| 13288 | SLPSSPER200020000                             | sp P02545 LMNA_HUMAN  |
| 13289 | ASSHSSQTQGGGSVTK2000000000000                 | sp O60245 PCDH7_HUMAN |
| 13290 | SSSPLPTVQLHPQSPTAGK2.000000000002E+19         | sp Q9NTI5 PDS5B_HUMAN |
| 13291 | LDSEMDSSENYDTMSSPLPGK32000000000              | sp Q8WWQ0 PHIP_HUMAN  |
| 13292 | LSRGSISSTSEVHSPNVGLR2220000000000000          | sp Q8IYB3 SRRM1_HUMAN |
| 13293 | KPPAPSPVQSQSPSTNWSAPVPVK2020220000000000      | sp P55198 AF17_HUMAN  |
| 13294 | YSKPTAPAPSAPPSPAPEPPK2000000000               |                       |

|       |                                                   |                       |
|-------|---------------------------------------------------|-----------------------|
|       |                                                   | sp P30505 1C08_HUMAN  |
|       |                                                   | sp Q9TNN7 1C05_HUMAN  |
|       |                                                   | sp Q29960 1C16_HUMAN  |
|       |                                                   | sp P30508 1C12_HUMAN  |
|       |                                                   | sp Q95604 1C17_HUMAN  |
| 13295 | GGSCSQAASSNSAQGSDESLIACK2000000000000000          | sp Q07000 1C15_HUMAN  |
|       |                                                   | sp Q29963 1C06_HUMAN  |
|       |                                                   | sp P30510 1C14_HUMAN  |
|       |                                                   | sp P04222 1C03_HUMAN  |
|       |                                                   | sp Q29865 1C18_HUMAN  |
|       |                                                   | sp P30504 1C04_HUMAN  |
| 13296 | SLGSAMKDCPYCGKTFR200201000000000000               | sp O15090 ZN536_HUMAN |
| 13297 | TADSSSEDEEEYVVEK20000000000000                    | sp P45973 CBX5_HUMAN  |
| 13298 | VYSLPDGTFSSDEDEEEEEEEEEEEEEET2E+20                | sp O15371 EIF3D_HUMAN |
| 13299 | RTSLPCIPR20000000                                 | sp Q14432 PDE3A_HUMAN |
| 13300 | SVSSFPVPQDNVDTHPGSGK2E+20                         | sp Q676U5 A16L1_HUMAN |
| 13301 | EKEPGEQASVPLSPK2000                               | sp P42858 HD_HUMAN    |
| 13302 | RGGADTYSVPSVLSR232000000000                       | sp P14543 NID1_HUMAN  |
| 13303 | ETSVSKEDTDHEEKASNEVDTK2000200000020000000         | sp O75475 PSIP1_HUMAN |
| 13304 | DLEPGEVPSDSDEDEGEHK20200000000                    | sp Q96T58 MINT_HUMAN  |
| 13305 | FVCVGGSPSR20000                                   | sp Q16831 UPP1_HUMAN  |
| 13306 | AGEAPTENPAPPTQSSAE20000000                        | sp P16989 YBOX3_HUMAN |
| 13307 | DSFIENSSNCTSGSSKPNSPSISPSILSNTEHK2.022E+22        | sp Q99700 ATX2_HUMAN  |
| 13308 | SVCPGGSSPGSSSGGR20000200000                       | sp Q53LP3 SWAHC_HUMAN |
| 13309 | RNSNSPPSPSMNR20000200010000                       | sp Q7Z5L9 I2BP2_HUMAN |
| 13310 | LEPTNVQTVTCSR2000                                 | sp Q99741 CDC6_HUMAN  |
| 13311 | LPNLSSPAEGPPGPPSGPAPR20000000000000000000         | sp O60784 TOM1_HUMAN  |
| 13312 | HSLSGSSPGMK20002200000                            | sp Q9UQ35 SRRM2_HUMAN |
| 13313 | LSPIPEEVPK2000000000                              | sp Q96T23 RSF1_HUMAN  |
| 13314 | TVSLTPSPTTQVETPDLVDHNTSPLFR200000                 | sp Q05209 PTN12_HUMAN |
| 13315 | IWDPTPSHTPAGAATPGRGDTPGHATPGHGGATSSAR2.000002E+23 | sp O75533 SF3B1_HUMAN |
| 13316 | ELPAAAAIGATSLVAAPHSSSSSPSK2200000000              | sp Q14C86 GAPD1_HUMAN |
| 13317 | TGVTSTSDSEEEGDDQEGEKK220000000000000000           | sp O75475 PSIP1_HUMAN |
| 13318 | APPPSRPPRPSV200                                   | sp Q9H6X2 ANTR1_HUMAN |
| 13319 | SKHEEEWTDDDLVESL2000000000                        | sp P51946 CCNH_HUMAN  |
| 13320 | LKSSTSFANIQENSN220000000200                       | sp Q86WC4 OSTM1_HUMAN |
| 13321 | NSSGSESSLPNLAR20000000000000                      | sp Q2M2I8 AAK1_HUMAN  |
| 13322 | KPVSEKTESDTIPYLK202000000                         | sp Q96PC5 MIA2_HUMAN  |
| 13323 | LKSSTSFANIQENSN20020000000000                     | sp Q86WC4 OSTM1_HUMAN |
| 13324 | RPLSGPDVGTQPAGLASGAK20000000000000000000          | sp O96013 PAK4_HUMAN  |
| 13325 | RHSSVSDSQPEPPSVGTEYSQGASPPQHQLK2.02E+28           | sp P39880 CUX1_HUMAN  |
| 13326 | ADTEGKSPSHSSSNRPFTPPTSTGGSK2.02E+19               | sp Q15648 MED1_HUMAN  |
| 13327 | EKSATRPSPPER2002020000                            | sp Q9UQ35 SRRM2_HUMAN |
| 13328 | ALPTSKPEGLHSSPVGPSSSK2000000000                   | sp Q9UPT8 ZC3H4_HUMAN |
| 13329 | HSLSGSSPGMK20000200100                            | sp Q9UQ35 SRRM2_HUMAN |
| 13330 | DRPGSPESPLLDAPFSR20000000000000                   | sp Q8TF72 SHRM3_HUMAN |
| 13331 | CSPTVAFVEFPSSPQLK200000000200000                  | sp Q9UPQ0 LIMC1_HUMAN |
| 13332 | SRLTPVSPESSTEEK200200000000000000                 | sp Q13501 SQSTM_HUMAN |
| 13333 | SRSPRPK2000000000                                 | sp Q8WUQ7 CATIN_HUMAN |
| 13334 | RSSLSSHSHQSQIYR20220200000000                     | sp O15027 SC16A_HUMAN |
| 13335 | AESSGGGTVPSAGILEQGSPGSGSPPKPK2E+29                | sp Q68EM7 RHG17_HUMAN |
| 13336 | VRPSSDLNNTGQSPHHK200000                           | sp P27448 MARK3_HUMAN |
| 13337 | DRSPHRSSPSDTRPK2000020000                         | sp Q8IWS0 PHF6_HUMAN  |
| 13338 | SPDSCRQALPCLPSTQDVPSR2E+22                        | sp Q9Y283 INVS_HUMAN  |

|       |                                                                 |                       |
|-------|-----------------------------------------------------------------|-----------------------|
| 13339 | RSPASPHPPFFTHR20020000000000                                    | sp Q17RY0 CPEB4_HUMAN |
| 13340 | TPLSSLSATSNNSTVACIDR2020000000000000                            | sp P00533 EGFR_HUMAN  |
| 13341 | YSEFTSTSTSGTGHNQTR2020000000                                    | sp P48960 CD97_HUMAN  |
| 13342 | VAEPGAEATSSTGEESGSEHPPAVPMHNC20000020000000000000               | sp Q14684 RRP1B_HUMAN |
| 13343 | SGSDAGEARPPTPASPR2000000002000000                               | sp Q96FS4 SIPA1_HUMAN |
| 13344 | ITSPLMEPSSIEK200100000000                                       | sp P28066 PSA5_HUMAN  |
| 13345 | ATNESEDEIPQLVPIGKK200000000000000000                            | sp 076021 RL1D1_HUMAN |
| 13346 | KLPSDSGDLEALEGK20000000000                                      | sp 060524 NEMF_HUMAN  |
| 13347 | QPSSPYEDKDKDK20000000000                                        | sp Q9UQ35 SRRM2_HUMAN |
| 13348 | IKPVTENLVLSSTGFCQSSGDEALSK202000000000000000                    | sp P46100 ATRX_HUMAN  |
| 13349 | APSASDSKADSDGAKPEPVAMAR2.0000020002E+23                         | sp Q7Z4V5 HDGR2_HUMAN |
| 13350 | NACILQASGSPPAKSPTDPK200002000000                                | sp P41182 BCL6_HUMAN  |
| 13351 | RRSPSPYYSR200003000                                             | sp P62995 TRA2B_HUMAN |
| 13352 | NLSPTPASPNOGPPPQVPVSPGPPK2000000                                | sp Q13595 TRA2A_HUMAN |
| 13353 | SYLLGNSSPR20000                                                 | sp Q9COE8 LNP_HUMAN   |
| 13354 | ATAPQTQHVSPMR2000000000100                                      | sp P02545 LMNA_HUMAN  |
| 13355 | KWEDSETPK202000                                                 | sp P29692 EF1D_HUMAN  |
| 13356 | MEQQYESSSDGTEKLPK200020000000                                   | sp P31629 ZEP2_HUMAN  |
| 13357 | SRTVSASSTGDLPK202020000000                                      | sp P46100 ATRX_HUMAN  |
| 13358 | RLSSTSLASGHSVR2222000002000                                     | sp P78362 SRPK2_HUMAN |
| 13359 | YFQSPSR30000000                                                 | sp Q9BZL6 KPCD2_HUMAN |
| 13360 | AGASIPSSGAASPR2000                                              | sp Q16629 SRSF7_HUMAN |
| 13361 | SEDESETEDEEEKSQEDQEQK2E+21                                      | sp Q9P270 SLAI2_HUMAN |
| 13362 | VPAQCTVPSHPQSTP VHSPDR200020000                                 | sp P25205 MCM3_HUMAN  |
| 13363 | LSPLLPGGGGR20000000000                                          | sp Q9NXL9 MCM9_HUMAN  |
| 13364 | GLGHPPSSPLLK200000                                              | sp 015320 CTGE5_HUMAN |
| 13365 | IPRPSVSGCSR200                                                  | sp 095785 WIZ_HUMAN   |
| 13366 | LGDDNLCNTPHLPPCSPPK20000                                        | sp 075122 CLAP2_HUMAN |
| 13367 | QQLEEEENFSRPQIDENPLDDNSEEMEDAPK20000000000                      | sp Q99741 CDC6_HUMAN  |
| 13368 | DSSKGEDSAEETEAKPAVVAPVVEAVSTPSAAFPDATAEQGPILTK2.2E+48           | sp Q5F1R6 DJC21_HUMAN |
| 13369 | KSASSRELMIVGR2022000100000                                      | sp Q12906 ILF3_HUMAN  |
| 13370 | EDALDDSVSSSVHASPLASSPVR202000000000020000                       | sp P53794 SC5A3_HUMAN |
| 13371 | SQSNPILGSPFFSHFDGQDSYAAAVR2E+24                                 | sp P49792 RBP2_HUMAN  |
| 13372 | IISPGSSTPSSTR200000000200                                       | sp Q7Z3J3 RGPD4_HUMAN |
| 13373 | DYDDMSPR12000                                                   | sp A6NKT7 RGPD3_HUMAN |
| 13374 | GTSPAGPGTFKPGSPTVGPGLPPAGPSGLPSLPPPAAPASGPPLSATQIK2.0000002E+51 | sp 014715 RGPD8_HUMAN |
| 13375 | SRSYSR20202000                                                  | sp Q99666 RGPD5_HUMAN |
| 13376 | WSPAYSFSSDSPLDSSPK200020000                                     | sp Q9NYL2 MLTK_HUMAN  |
| 13377 | SKKEDSSSENAEPDLDNEDEEPAVEIEPEPEPQVTPAPPPAK2.202E+41             | sp Q5VT52 RPRD2_HUMAN |
| 13378 | ILDATDQESLELKPTSR20002000000000                                 | sp P61978 HNRPK_HUMAN |
| 13379 | EPSVPASCAVSATYERSPSPAHLPPDDPK2300000000000000                   | sp P54259 ATN1_HUMAN  |
| 13380 | HSSPHISR2000000                                                 | sp Q8IYB3 SRRM1_HUMAN |
| 13381 | EGTPPPPPSR2000000000                                            | sp Q13595 TRA2A_HUMAN |
|       |                                                                 | sp P62995 TRA2B_HUMAN |
|       |                                                                 | sp Q07955 SRSF1_HUMAN |
|       |                                                                 | sp Q8NCG7 DGLB_HUMAN  |
|       |                                                                 | sp P49711 CTCF_HUMAN  |
|       |                                                                 | sp Q8IZA0 K319L_HUMAN |
|       |                                                                 | sp Q92615 LAR4B_HUMAN |
|       |                                                                 | sp 060583 CCNT2_HUMAN |
|       |                                                                 | sp Q9Y618 NCOR2_HUMAN |



|       |                                                           |                       |
|-------|-----------------------------------------------------------|-----------------------|
| 13382 | RLSDCESTDVKR20000000000                                   | sp Q7Z333 SETX_HUMAN  |
| 13383 | SKFDSDEEEEDTENVEAASSGK200000000000020000                  | sp Q8TF01 PNISR_HUMAN |
| 13384 | TPEKLDNTPASPPRSPAEPNDIPIAK20002000000000000               | sp 095359 TACC2_HUMAN |
| 13385 | LAWPINSNPPNTFV200000000                                   | sp Q15760 GPR19_HUMAN |
| 13386 | EASEVKPPR20000000                                         | sp 060341 KDM1A_HUMAN |
| 13387 | SRSPQRPGWSR200000000200                                   | sp Q9UQ35 SRRM2_HUMAN |
| 13388 | VGSLTPSSPK2020002000                                      | sp Q2M2I8 AAK1_HUMAN  |
| 13389 | SHSLSPSPVVK2020000000                                     | sp Q96GE4 CEP95_HUMAN |
| 13390 | SHSGTSPDNTAPPPPPRPQPSHSR2. 02E+25                         | sp Q96D71 REPS1_HUMAN |
| 13391 | VAEPGAEATSSTGEESGSEHPPAVPMHNK2. 2020002E+21               | sp Q14684 RRP1B_HUMAN |
| 13392 | RSTSLPSR22000000                                          | sp P18054 LOX12_HUMAN |
| 13393 | TPSSEEISPTK200000000                                      | sp Q15311 RBP1_HUMAN  |
| 13394 | NTPSQHSHSIQHSPER20020200020000                            | sp Q9NYF8 BCLF1_HUMAN |
| 13395 | MTPNSTGEVPSPIPK12000200000000000                          | sp Q8TDU6 GPBAR_HUMAN |
| 13396 | EDFDSTSSSSSTPPLQPR20000000                                | sp Q13620 CUL4B_HUMAN |
| 13397 | SFSPLQPGQAPTGR2000000000000                               | sp Q7Z3C6 ATG9A_HUMAN |
| 13398 | TLETQLAPDCCPSDQDPAPAHPSPHASPMNK2000201000                 | sp Q9BUR4 WAP53_HUMAN |
| 13399 | ILATDVSSKNTPDSKK2002000                                   | sp Q03188 CENPC_HUMAN |
| 13400 | VEMYSGSDDDDFNKLPK2000000000000000                         | sp 060841 IF2P_HUMAN  |
| 13401 | HAASYSDSENQGSYSGVIPPPGR200000000000000000                 | sp Q96D71 REPS1_HUMAN |
| 13402 | ADGYEPPVQESV200                                           | sp P61247 RS3A_HUMAN  |
| 13403 | LVKPSSSSSGSRSSR200000002200                               | sp Q9H6B4 CLMP_HUMAN  |
| 13404 | MPGMSPANPSLHSPVPDASHSPR2E+19                              | sp 060244 MED14_HUMAN |
| 13405 | LQLSDEESVFEEALMSPDTR20000001200000                        | sp Q86SQ0 PHLB2_HUMAN |
| 13406 | MHNLHGTKPPPSEGSDEEEEEDEEDEEER2E+24                        | sp Q9BQ67 GRWD1_HUMAN |
| 13407 | QPGQVIGATTPSTGSPTNK20000000                               | sp Q9ULM3 YETS2_HUMAN |
| 13408 | SPSSESSQHTPPARPR200000000000000000                        | sp 014733 MP2K7_HUMAN |
| 13409 | DSSDSADGRATPSENLPSSAR2E+20                                | sp Q8N684 CPSF7_HUMAN |
| 13410 | HSTASHSSHTSGIEADTKPR202220000000000000                    | sp Q96NE9 FRMD6_HUMAN |
| 13411 | YSPSQNSPIHHIPSR32000020000000000                          | sp Q9NYF8 BCLF1_HUMAN |
| 13412 | KYSTSWTAPR3002000000                                      | sp Q8NEM8 CBPC3_HUMAN |
| 13413 | ERSPSPSFR20000000                                         | sp P49585 PCY1A_HUMAN |
| 13414 | TFVLTPELSPGK20000                                         | sp Q96DY7 MTBP_HUMAN  |
| 13415 | DQHLNNSSSPQR20000                                         | sp Q15154 PCM1_HUMAN  |
| 13416 | LDIPTGTPQR200000                                          | sp P52732 KIF11_HUMAN |
| 13417 | KVTDQISDIVYK20000000300                                   | sp P20929 NEBU_HUMAN  |
| 13418 | SFSSSPSPSPTSPHRPSIR2. 02220202E+20                        | sp Q86VM9 ZCH18_HUMAN |
| 13419 | SPESDRPR200200000                                         | sp Q96T37 RBM15_HUMAN |
| 13420 | SKSHESQLGMR2000000                                        | sp Q8IVT5 KSR1_HUMAN  |
| 13421 | RGGHSSVSTESSESSFHSS2000000000000000                       | sp P61073 CXCR4_HUMAN |
| 13422 | GPTSSPCEEEGDEGEEDRTSDLRDEASSVTR2. 2E+29                   | sp Q86VM9 ZCH18_HUMAN |
| 13423 | SPDTLAPVASER20000000000000                                | sp 043310 CTIF_HUMAN  |
| 13424 | LKWTNTGTPHQTPYQLDPANITLPEMEIR30000000200010000            | sp 000754 MA2B1_HUMAN |
| 13425 | GSSPSIRPIQGSQGSSSPVEK2E+20                                | sp Q92560 BAP1_HUMAN  |
| 13426 | NQSPTEAEKPASSSLPSSPPPQLLTR22000000000                     | sp Q99567 NUP88_HUMAN |
| 13427 | DTGSEVPSGSGHGCPPTPPAPANFEDVAPTGSGEFGATRESPK20000020000000 | sp 015047 SET1A_HUMAN |
| 13428 | SPAGSQQFGYSPGQQQTHPQGSRR2. 00000000002E+25                | sp Q8TAP9 MPLKI_HUMAN |
| 13429 | HSSSPLSPGGPHTLTKPTTSSSER2. 2E+23                          | sp Q9Y618 NCOR2_HUMAN |
| 13430 | TFSDENVL20000000                                          | sp Q8NB49 AT11C_HUMAN |
| 13431 | SVCPGGSSPGSSSGGR200002000000                              | sp Q53LP3 SWAHC_HUMAN |
| 13432 | DQPDGSSLSPAQSPSQSPPAASSLR202000000000000                  | sp Q6WCQ1 MPRIP_HUMAN |
| 13433 | VAPSPDSSDTDSSEDPRLR202000000000000                        | sp Q9NP71 MLXPL_HUMAN |
| 13434 | SRSRSPHEAGFCVYLK202020000000000000                        | sp Q9NTZ6 RBM12_HUMAN |

|       |                                                  |                       |
|-------|--------------------------------------------------|-----------------------|
| 13435 | LNLGTDSOSSPQK20000                               | sp Q16512 PKN1_HUMAN  |
| 13436 | SQDADSPGSSGAPENLTFK200000000000                  | sp P55196 AFAD_HUMAN  |
| 13437 | SPTPPSSAGLGSNSAPPIPDSR220000202000000000         | sp Q8IWX8 CHERP_HUMAN |
| 13438 | LTTEATQTPVSNK2002000                             | sp Q9BXS6 NUSAP_HUMAN |
| 13439 | LPLVPESPRR20000                                  | sp Q86WB0 NIPA_HUMAN  |
| 13440 | YSPSQNSPIHHIPSR3200000000000000                  | sp Q9NYF8 BCLF1_HUMAN |
| 13441 | VVPGQFDDADSSDSENRLK220200000000                  | sp Q9BRS2 RIOK1_HUMAN |
| 13442 | YSPTSPTYSPPTPK320000030002000                    | sp P24928 RPB1_HUMAN  |
| 13443 | VAGGAAPSKPASAKK20000                             | sp Q14978 NOLC1_HUMAN |
| 13444 | AAPSTAPAEATPPKPGAEAEAPPK2E+19                    | sp O95817 BAG3_HUMAN  |
| 13445 | ITEVSCKSPQDPVK2000000000000000                   | sp P46013 KI67_HUMAN  |
| 13446 | EVHDELEDLSPPPPPLSPPTTSPHK20000200000             | sp Q9NQX3 GEPH_HUMAN  |
| 13447 | YSRSPYSR20200000                                 | sp Q9BRL6 SRSF8_HUMAN |
| 13448 | KAEGEPQEE SPLKSK2000200                          | sp Q9NYF8 BCLF1_HUMAN |
| 13449 | EELMSSDLEETAGSTSIPK20000000000                   | sp O00567 NOP56_HUMAN |
| 13450 | RHSSDINHLVTQGRESPEGSYTDDANQEV2.0000000000002E+28 | sp Q5TON5 FBP1L_HUMAN |
